# Supplementary material for: Elucidation of factors shaping reactivity of 5′-deoxyadenosyl – a prominent organic radical in biology
Source: Royal Society of Chemistry journal article supplement (doi:10.1039/d4cp01725k), 2024-01-01
Supplement: d4cp01725k1.pdf [file d4cp01725k1.pdf]

## ELECTRONIC SUPPORTING INFORMATION

Elucidation of factors shaping reactivity of 5'-deoxyadenosyl –  
a prominent organic radical in biology

Zuzanna Wojdyla,<sup>a</sup> Mauricio Maldonado-Domínguez,<sup>a</sup> Priyam Bharadwaz,<sup>a</sup> Martin Culka,<sup>b</sup>

and Martin Srnec<sup>a,\*</sup>

<sup>a</sup> *J. Heyrovský Institute of Physical Chemistry, Czech Academy of Sciences, Dolejškova 3, 18200 Prague, Czech Republic*

<sup>b</sup> *Institute of Organic Chemistry and Biochemistry, Czech Academy of Sciences, Flemingovo nám. 2, 166 10 Prague, Czech Republic*

**email address:** martin.srnec@jh-inst.cas.cz

**Table S1:** The list of substrates (in different protonation states) native to radical SAM enzymes (also listed).

| Number | Radical SAM enzyme | Substrates                                   | Optimized structures of Substrates with highlighted HAA hydrogen                      | Total charge |
|--------|--------------------|----------------------------------------------|---------------------------------------------------------------------------------------|--------------|
| 1A     | BioB               | Dethiobiotin <sup>1</sup>                    | 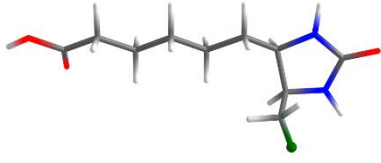   | 0            |
| 1B     | BioB               | Dethiobiotin <sup>1</sup>                    |    | -1           |
| 2A     | ThiC               | 5-aminoimidazole ribonucleotide <sup>2</sup> |    | 0            |
| 2B     | ThiC               | 5-aminoimidazole ribonucleotide <sup>2</sup> |   | -1           |
| 2C     | ThiC               | 5-aminoimidazole ribonucleotide <sup>2</sup> |  | -2           |

|    |        |                                                   |                                                                                       |    |
|----|--------|---------------------------------------------------|---------------------------------------------------------------------------------------|----|
| 3  | LipA   | Octanoyl derivative of the H-protein <sup>3</sup> | 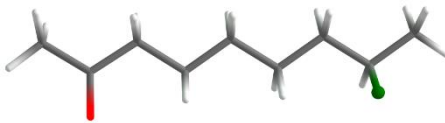   | 0  |
| 4  | Pfl-AE | PFL (Glycine residue) <sup>4</sup>                |    | 0  |
| 5  | LAM    | Lysine <sup>5</sup>                               |    | 0  |
| 6A | EAM    | Glutamic acid <sup>6</sup>                        |    | -1 |
| 6B | EAM    | Glutamic acid <sup>6</sup>                        |   | -1 |
| 6C | EAM    | Glutamic acid <sup>6</sup>                        |  | 0  |

|           |      |                                                 |                                                                                       |    |
|-----------|------|-------------------------------------------------|---------------------------------------------------------------------------------------|----|
| <b>6D</b> | EAM  | Glutamic acid <sup>6</sup>                      | 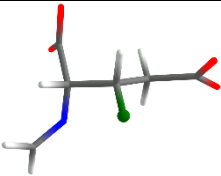   | -2 |
| <b>7A</b> | QueE | 6-carboxy-5,6,7,8 tetrahydropterin <sup>7</sup> |    | 0  |
| <b>7B</b> | QueE | 6-carboxy-5,6,7,8-Tetrahydropterin <sup>7</sup> |    | -1 |
| <b>8A</b> | MqnC | Dehypoxanthine Futosine <sup>8</sup>            |    | 0  |
| <b>8B</b> | MqnC | Dehypoxanthine Futosine <sup>8</sup>            |   | -1 |
| <b>9</b>  | SkfB | SkfB (cyclotriene) <sup>9</sup>                 |  | 0  |

|            |       |                                              |                                                                                       |    |
|------------|-------|----------------------------------------------|---------------------------------------------------------------------------------------|----|
| <b>10A</b> | NosL  | CH <sub>3</sub> -Tryptophan <sup>10,11</sup> | 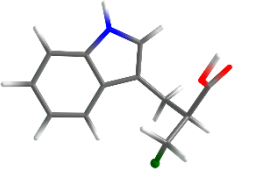   | 0  |
| <b>10B</b> | NosL  | CH <sub>3</sub> -Tryptophan <sup>10,11</sup> |    | -1 |
| <b>11A</b> | NosL  | CH <sub>2</sub> -Tryptophan <sup>10,11</sup> |    | 0  |
| <b>11B</b> | NosL  | CH <sub>2</sub> -Tryptophan <sup>10,11</sup> |    | -1 |
| <b>12A</b> | anSME | Thiol-based amino acid <sup>12</sup>         |   | 0  |
| <b>12B</b> | anSME | Alcohol-based amino acid <sup>12</sup>       |  | 0  |

|            |      |                                                   |                                                                                       |    |
|------------|------|---------------------------------------------------|---------------------------------------------------------------------------------------|----|
| <b>13A</b> | BlsE | cytosylglucuronic acid (CGA), chair <sup>13</sup> | 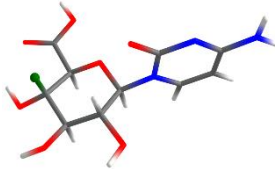   | 0  |
| <b>13B</b> | BlsE | cytosylglucuronic acid (CGA), boat <sup>13</sup>  |    | 0  |
| <b>13C</b> | BlsE | cytosylglucuronic acid (CGA), chair <sup>13</sup> |    | -1 |
| <b>13D</b> | BlsE | cytosylglucuronic acid (CGA), boat <sup>13</sup>  |    | -1 |
| <b>14A</b> | RimO | S12 aspartate 89 <sup>14</sup>                    |   | 0  |
| <b>14B</b> | RimO | S12 aspartate 89 <sup>14</sup>                    |  | -1 |

|            |       |                                                         |                                                                                       |    |
|------------|-------|---------------------------------------------------------|---------------------------------------------------------------------------------------|----|
| <b>15</b>  | MoaA  | Guanosine 5'-triphosphate (GTP) <sup>15</sup>           | 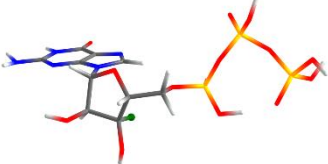   | 0  |
| <b>16</b>  | GenK  | GenX2 <sup>16</sup>                                     |    | 0  |
| <b>17A</b> | DesII | TDP-ADG <sup>17</sup>                                   |    | 0  |
| <b>17B</b> | DesII | TDP-ADG <sup>17</sup>                                   |    | -1 |
| <b>17C</b> | DesII | TDP-ADG <sup>17</sup>                                   |   | -2 |
| <b>18</b>  | OxsB  | 2'-deoxyadenosine-5'-monophosphate (dAMP) <sup>18</sup> |  | -2 |

|     |          |                                               |                                                                                       |    |
|-----|----------|-----------------------------------------------|---------------------------------------------------------------------------------------|----|
| 19  | RlmN/Cfr | Methyl- cysteinyl 355 <sup>19</sup>           | 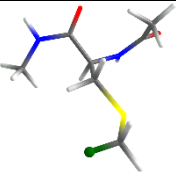   | 0  |
| 20  | TYW1     | N-methylguanosine <sup>20</sup>               |    | 0  |
| 21A | Fom3     | 2-hydroxyethylphosphonate (HEP) <sup>21</sup> |    | 0  |
| 21B | Fom3     | 2-hydroxyethylphosphonate (HEP) <sup>21</sup> |    | -1 |
| 21C | Fom3     | 2-hydroxyethylphosphonate (HEP) <sup>21</sup> |   | -2 |
| 22A | MftC     | Tyrosine <sup>22</sup>                        |  | 0  |



|            |      |                                 |                                                                                       |    |
|------------|------|---------------------------------|---------------------------------------------------------------------------------------|----|
| <b>22B</b> | MftC | Tyrosine <sup>22</sup>          | 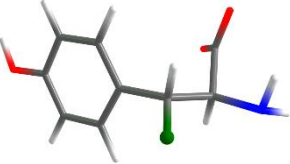   | -1 |
| <b>22C</b> | MftC | Tyrosine <sup>22</sup>          |    | 1  |
| <b>22D</b> | MftC | Tyrosine <sup>22</sup>          |    | 0  |
| <b>23A</b> | PqqE | PqqE (Glu-cgamma) <sup>23</sup> |    | 0  |
| <b>23B</b> | PqqE | PqqE (Glu-cgamma) <sup>23</sup> |   | -1 |
| <b>24</b>  | PoyD | L-valine <sup>24</sup>          |  | 0  |

|    |       |                          |                                                                                     |   |
|----|-------|--------------------------|-------------------------------------------------------------------------------------|---|
| 25 | AprD4 | Paromamine <sup>25</sup> | 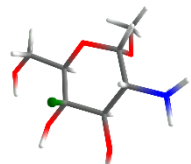 | 0 |
| 26 | NosN  | MTA <sup>26</sup>        |  | 0 |
| 27 | Alba  | Alba <sup>27</sup>       |  | 0 |
| 28 | SkfB  | Methionine <sup>9</sup>  |  | 0 |

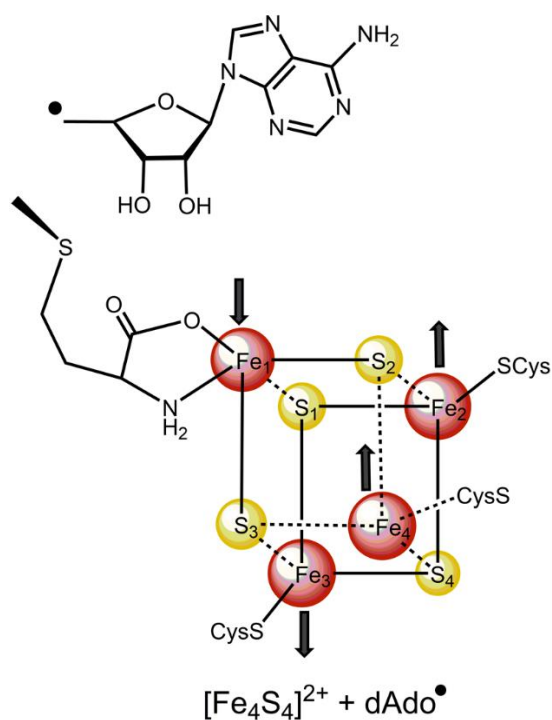

|                       | PFL-AE                                               | LAM                                                  |
|-----------------------|------------------------------------------------------|------------------------------------------------------|
|                       | $[\text{Fe}_4\text{S}_4]^{2+} + \text{dAdo}^\bullet$ | $[\text{Fe}_4\text{S}_4]^{2+} + \text{dAdo}^\bullet$ |
| <b>Fe<sub>1</sub></b> | -3.649                                               | -3.648                                               |
| <b>Fe<sub>2</sub></b> | 3.657                                                | 3.631                                                |
| <b>Fe<sub>3</sub></b> | -3.743                                               | -3.749                                               |
| <b>Fe<sub>4</sub></b> | 3.674                                                | 3.729                                                |
| <b>S<sub>1</sub></b>  | -0.137                                               | -0.199                                               |
| <b>S<sub>2</sub></b>  | 0.260                                                | 0.264                                                |
| <b>S<sub>3</sub></b>  | -0.134                                               | -0.083                                               |
| <b>S<sub>4</sub></b>  | -0.137                                               | 0.068                                                |
| <b>C<sub>5</sub></b>  | 1.014                                                | 1.025                                                |

**Figure S1:** Schematic representation of antiferromagnetic coupling present in PFL-AE and LAM with their corresponding Mulliken spin densities of key atoms.

***Dihedral Dependence of Reactivity of the 5'dAdo•.*** The 5'dAdo• radical is relatively flexible molecule. we selected HAA from the beta position of lysimine (representant of lysine), a reaction carried out by the lysine aminomutase (LAM) enzyme, as a model reaction. We explored all three routes along the entire torsional coordinate  $\alpha$  of the adenyl-ribosyl C–N bond and the resulting reaction profiles are presented in **Figure 5**.

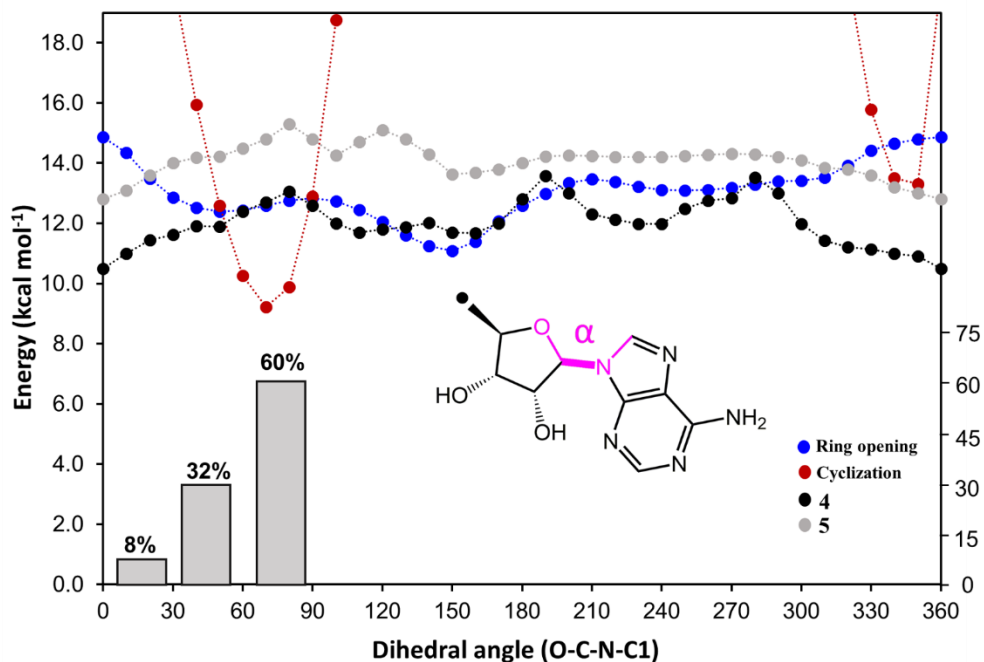

**Figure S2.** Potential energy barriers for the ring opening, cyclization and HAA reaction paths of the 5'dAdo' radical in homogeneous aqueous solution, as a function of the ribosyl-adenyl dihedral angle (shown in magenta). The histogram shows the population of different conformers in nature (determined by the dihedral angle as depicted in the figure), extracted from a snapshot of the PDB database (see the table below). The RC-to-TS HAA reaction involves the abstraction of H-atom from the beta position in lysimine. For each point, the reactant complex (RC) and the corresponding transition state (TS) were optimized with constraints on a given dihedral angle.

**Table S2:** The dihedral angle within the SAM or SAH, which defines the position of the adenine relative to the ribose ring – Y[O4'-C1'-N9-C8]

| PDB ID | resolution (Å) | (residue name)_ (residue id)_ (chain id) | dihedral angle O4'-C1'-N9-C8 (deg) |
|--------|----------------|------------------------------------------|------------------------------------|
| 2a5h   | 2.1            | SAM_417_A                                | 69.4                               |
| 2a5h   | 2.1            | SAM_417_B                                | 65.9                               |

|      |      |            |      |
|------|------|------------|------|
| 2a5h | 2.1  | SAM_417_C  | 63.5 |
| 2a5h | 2.1  | SAM_417_D  | 62.8 |
| 1r30 | 3.4  | SAM_501_A  | 26.7 |
| 1r30 | 3.4  | SAM_501_B  | 32.4 |
| 1olt | 2.07 | SAM_501_A  | 43.2 |
| 2fb2 | 2.25 | SAM_501_A  | 40.9 |
| 2fb2 | 2.25 | SAM_501_B  | 42.7 |
| 4r34 | 1.8  | SAH_503_A  | 78.7 |
| 4r34 | 1.8  | SAH_503_B  | 80.4 |
| 3rfa | 2.05 | SAM_406_A  | 76.2 |
| 3rfa | 2.05 | SAM_406_B  | 65.8 |
| 5wgg | 2.04 | SAM_504_A  | 71.2 |
| 3cix | 1.7  | SAH_1501_A | 56.2 |
| 4jye | 1.65 | SAH_402_A  | 54   |
| 5fep | 1.45 | SAM_407_A  | 53.6 |
| 5vsl | 1.97 | SAH_402_A  | 81.7 |
| 5vsl | 1.97 | SAH_402_B  | 85.5 |
| 3ciw | 1.35 | SAH_1501_A | 57   |
| 3cb8 | 2.77 | SAM_501_A  | 62.8 |
| 5fes | 1.27 | SAM_408_A  | 54.2 |
| 4njh | 1.9  | SAM_302_A  | 69   |
| 4njh | 1.9  | SAM_302_B  | 71   |
| 3iiz | 1.62 | SAM_1501_A | 49.5 |

|      |      |           |      |
|------|------|-----------|------|
| 5ff2 | 1.47 | SAH_408_A | 56.7 |
| 5ff3 | 1.18 | SAH_410_A | 66.7 |
| 3t7v | 1.5  | SAM_992_A | 41.9 |
| 4k37 | 1.62 | SAM_504_A | 85.1 |
| 4k37 | 1.62 | SAM_504_B | 89.5 |
| 2a5h | 2.1  | SAM_417_A | 69.4 |
| 2a5h | 2.1  | SAM_417_B | 65.9 |
| 2a5h | 2.1  | SAM_417_C | 63.5 |
| 2a5h | 2.1  | SAM_417_D | 62.8 |
| 1r30 | 3.4  | SAM_501_A | 26.7 |
| 1r30 | 3.4  | SAM_501_B | 32.4 |
| 1olt | 2.07 | SAM_501_A | 43.2 |
| 6htk | 2    | SAH_508_A | 76.1 |
| 6htk | 2    | SAH_502_B | 79.4 |
| 6q2p | 1.45 | SAH_402_A | 78.1 |
| 6q2p | 1.45 | SAH_403_B | 80.8 |
| 2fb2 | 2.25 | SAM_501_A | 40.9 |
| 2fb2 | 2.25 | SAM_501_B | 42.7 |
| 6bxo | 1.66 | SAH_901_A | 13.3 |
| 6bxo | 1.66 | SAH_901_B | 19.1 |
| 6fz6 | 1.42 | SAH_402_A | 78.8 |
| 6fz6 | 1.42 | SAH_402_B | 75.3 |
| 6efn | 1.29 | SAM_501_A | 77.2 |

|      |      |           |      |
|------|------|-----------|------|
| 6q2q | 1.89 | SAH_402_A | 78.9 |
| 6q2q | 1.89 | SAH_402_B | 82.2 |

**Comment on Dihedral Dependence of Reactivity of the 5'dAdo<sup>•</sup>.** The 5'dAdo<sup>•</sup> radical is relatively flexible molecule. we selected HAA from the beta position of lysimine (representant of lysine), a reaction carried out by the lysine aminomutase (LAM) enzyme, as a model reaction. We explored all three routes along the entire torsional coordinate  $\alpha$  of the adeny-ribosyl C–N bond and the resulting reaction profiles are presented in **Figure S1**. To better understand **Figure S1**, let first focus on the histogram at the bottom-left corner. It shows a narrow range of conformations, mostly within the 60-90°, for adeny-ribosyl torsion that SAM occupies in structurally characterized radical SAM enzymes (**Table associated with Figure S1**). Since the initial reductive cleavage of SAM into methionine and 5'dAdo<sup>•</sup> is unlikely to change this torsion angle, we conclude that the 5'dAdo<sup>•</sup> keeps this narrow torsional window while abstracting hydrogen atom from a wide range of natural substrates. Now, we observe that the undesired cyclization (CYC) and ring-opening decay (ROD) routes for 5'dAdo<sup>•</sup> show conformation-dependent reaction barrier profiles (in red and and blue in **Figure S1**), and that the barrier for both is accessible within this narrow torsional window. The final and most striking observation is that the favored conformational range lies precisely in the domain where HAA is the least accessible process of all. This single example highlights that 5'dAdo<sup>•</sup>-containing enzymes must have evolved to guarantee their metabolic proficiency by favoring a costly process while simultaneously disfavoring two very competitive unwanted side reactions.

**Table S3:** Free energies of all substrates and their oxidized, deprotonated and dehydrogenated conjugates, all together forming half-reaction thermodynamic cycles along with the key half-reaction thermodynamic properties, as depicted in **Scheme 4**. Two off-diagonal thermodynamic factors ( $\eta'$  and  $\sigma'$  - see the equations in the main text) associated with the reaction of the substrate with the methyl radical. The blue highlighted lines indicate species, for which the half-reaction off-diagonal thermodynamic properties are inaccessible due to the instability of the oxidized and/or deprotonated conjugate of the AH species. For these species, the  $\eta'$  and  $\sigma'$  were obtained employing the calibration lines from **Figure 6** in the main text.

| Subst.     | $G_{A-H}$<br>(au) | $G_{A-H^+}$<br>(au) | $G_{A^-}$<br>(au) | $G_{A\cdot}$<br>(au) | $(RT/F)\ln 10$<br>$pK_{a,AH}$<br>(mV) | $(RT/F)\ln 10$<br>$pK_{a,A\cdot}$<br>(mV) | $E_{AH}^\circ$<br>(mV) | $E_{A\cdot}^\circ$<br>(mV) | $\eta'$<br>(mV) | $\sigma'$<br>(mV) |
|------------|-------------------|---------------------|-------------------|----------------------|---------------------------------------|-------------------------------------------|------------------------|----------------------------|-----------------|-------------------|
| <b>1A</b>  | -727,241716       | -727,004272         | -726,688835       | -726,584547          | 3511                                  | -109                                      | 2181                   | -1442                      | 1922            | -1864             |
| <b>1B</b>  | -726,782138       | -726,577009         | -726,229176       | -726,126680          | 3513                                  | 723                                       | 1302                   | -1491                      | 2544            | -2418             |
| <b>2A</b>  | -1345,866283      | -1345,676379        | -                 | -1345,212363         | -                                     | -                                         | -                      | -                          | 1341            | -2090             |
| <b>2B</b>  | -1345,425120      | -1345,244703        | -                 | -1344,778612         | -                                     | -                                         | -                      | -                          | 2313            | -1835             |
| <b>2C</b>  | -1344,948090      | -                   | -                 | -1344,307529         | -                                     | -                                         | -                      | -                          | 3035            | -1646             |
| <b>3</b>   | -484,400052       | -484,14888          | -483,827204       | -483,750066          | 4054                                  | -678                                      | 2555                   | -2181                      | 2042            | -940              |
| <b>4</b>   | -456,641906       | -456,391488         | -456,12886        | -456,001921          | 2428                                  | -929                                      | 2534                   | -826                       | 906             | -1720             |
| <b>5</b>   | -535,180756       | -534,965715         | -534,613003       | -534,529912          | 3915                                  | 328                                       | 1572                   | -2019                      | 2638            | -1765             |
| <b>6A</b>  | -589,418483       | -589,210585         | -588,85792        | -588,766181          | 3720                                  | 562                                       | 1377                   | -1784                      | 2637            | -2097             |
| <b>6B</b>  | -589,425053       | -589,210664         | -588,860766       | -588,773336          | 3821                                  | 369                                       | 1554                   | -1901                      | 2584            | -1878             |
| <b>6C</b>  | -589,875855       | -589,630162         | -589,328978       | -589,223152          | 3348                                  | -455                                      | 2406                   | -1400                      | 1647            | -1649             |
| <b>6D</b>  | -588,964250       | -588,760754         | -588,385362       | -588,311994          | 4218                                  | 680                                       | 1257                   | -2284                      | 3075            | -1827             |
| <b>7A</b>  | -771,855779       | -771,685957         | -771,356969       | -771,247420          | 2041                                  | 402                                       | 341                    | -1299                      | 2182            | -2327             |
| <b>7B</b>  | -771,405695       | -771,250929         | -770,854407       | -770,783421          | 3467                                  | 1190                                      | -69                    | -2348                      | 3481            | -2142             |
| <b>8A</b>  | -1069,948519      | -1069,689838        | -1069,401735      | -1069,308628         | 3345                                  | -1156                                     | 2759                   | -1746                      | 1396            | -909              |
| <b>8B</b>  | -1069,496615      | -1069,282688        | -1068,946286      | -1068,856390         | 3441                                  | 70                                        | 1541                   | -1834                      | 2325            | -1714             |
| <b>9</b>   | -972,762990       | -972,537685         | -972,264725       | -972,130414          | 2026                                  | -448                                      | 1851                   | -625                       | 1104            | -2202             |
| <b>10A</b> | -670,443099       | -670,242837         | -669,883323       | -669,785617          | 3698                                  | 910                                       | 1169                   | -1621                      | 2769            | -2458             |



|            |              |              |              |              |      |       |      |       |      |       |
|------------|--------------|--------------|--------------|--------------|------|-------|------|-------|------|-------|
| <b>10B</b> | -669,985024  | -669,797472  | -669,40747   | -669,329376  | 4181 | 1206  | 824  | -2155 | 3355 | -2290 |
| <b>11A</b> | -670,443099  | -670,24284   | -669,901474  | -669,808166  | 3205 | 297   | 1169 | -1741 | 2420 | -1940 |
| <b>11B</b> | -669,983578  | -669,790495  | -669,42661   | -669,352163  | 3622 | 397   | 974  | -2254 | 2853 | -1648 |
| <b>12A</b> | -894,155892  | -893,924928  | -893,631427  | -893,512954  | 2738 | -320  | 2005 | -1056 | 1500 | -1988 |
| <b>12B</b> | -571,176637  | -570,932453  | -570,627427  | -570,535147  | 3411 | -719  | 2365 | -1769 | 1722 | -1202 |
| <b>13A</b> | -1080,031227 | -1079,792117 | -1079,492002 | -1079,383738 | 3140 | -418  | 2227 | -1334 | 1627 | -1723 |
| <b>13B</b> | -1080,026310 | -1079,791009 | -1079,496838 | -1079,386351 | 2874 | -519  | 2123 | -1273 | 1513 | -1694 |
| <b>13C</b> | -1079,588831 | -            | -1079,031741 | -1078,945807 | -    | -     | -    | -     | 2667 | -1742 |
| <b>13D</b> | -1079,580517 | -            | -1079,032899 | -1078,942906 | -    | -     | -    | -     | 1992 | -1919 |
| <b>14A</b> | -515,79764   | -515,589376  | -515,30602   | -515,155083  | 1845 | 287   | 1387 | -173  | 1304 | -3042 |
| <b>14B</b> | -515,344869  | -            | -514,80753   | -514,700463  | -    | -     | -    | -     | 2024 | -1911 |
| <b>15</b>  | -2742,720036 | -2742,508517 | -            | -2742,077613 | -    | -     | -    | -     | 1810 | -1967 |
| <b>16</b>  | -706,757144  | -706,528665  | -706,19786   | -706,110260  | 3685 | -145  | 1937 | -1896 | 2217 | -1518 |
| <b>17A</b> | -1160,106434 | -1159,877227 | -1159,558704 | -1159,459630 | 3371 | -167  | 1957 | -1584 | 1981 | -1723 |
| <b>17B</b> | -1159,670880 | -1159,447136 | -1159,11618  | -1159,021162 | 3560 | 61    | 1808 | -1694 | 2220 | -1806 |
| <b>17C</b> | -1159,193514 | -1159,007542 | -1158,626863 | -1158,543155 | 3885 | 1105  | 781  | -2002 | 3176 | -2327 |
| <b>18</b>  | -1455,495986 | -1455,316621 | -1454,954704 | -1454,840884 | 3195 | 1414  | 601  | -1183 | 2815 | -3124 |
| <b>19</b>  | -933,455907  | -933,224711  | -932,919626  | -932,810726  | 3059 | -265  | 2011 | -1317 | 1722 | -1843 |
| <b>20</b>  | -1039,049308 | -1038,841039 | -1038,517326 | -1038,398924 | 2943 | 500   | 1387 | -1058 | 2080 | -2566 |
| <b>21A</b> | -722,934997  | -            | -722,380179  | -722,290040  | -    | -     | -    | -     | 2138 | -1881 |
| <b>21B</b> | -722,494297  | -722,258646  | -721,924407  | -721,851339  | 3973 | -447  | 2132 | -2292 | 2284 | -1025 |
| <b>21C</b> | -722,012937  | -721,83451   | -721,427179  | -721,372732  | 4405 | 1034  | 575  | -2798 | 3689 | -1714 |
| <b>22A</b> | -630,153928  | -629,938968  | -            | -629,521975  | -    | -     | -    | -     | 1818 | -1965 |
| <b>22B</b> | -629,701211  | -            | -629,161444  | -629,067571  | -    | -     | -    | -     | 2424 | -1806 |
| <b>22C</b> | -630,584311  | -630,355225  | -            | -629,951037  | -    | -     | -    | -     | 1292 | -2103 |
| <b>22D</b> | -630,156547  | -629,936176  | -629,628494  | -629,520584  | 2836 | -221  | 1717 | -1344 | 1772 | -1854 |
| <b>23A</b> | -555,108983  | -554,89837   | -554,610202  | -554,466237  | 2040 | 228   | 1451 | -362  | 1397 | -2866 |
| <b>23B</b> | -554,651992  | -554,451049  | -554,103312  | -554,007930  | 3397 | 527   | 1188 | -1685 | 2543 | -2143 |
| <b>24</b>  | -574,540862  | -574,29670   | -574,032564  | -573,911419  | 2299 | -1045 | 2364 | -983  | 935  | -1526 |
| <b>25</b>  | -707,190411  | -706,92947   | -706,654836  | -706,541845  | 3040 | -982  | 2821 | -1205 | 1137 | -1415 |

|                 |              |              |              |              |      |       |      |       |      |       |
|-----------------|--------------|--------------|--------------|--------------|------|-------|------|-------|------|-------|
| <b>26</b>       | -1326,048574 | -1325,824093 | -1325,509848 | -1325,403981 | 3126 | -99   | 1828 | -1399 | 1899 | -1902 |
| <b>27</b>       | -727,001719  | -726,758711  | -726,50146   | -726,371342  | 2080 | -989  | 2333 | -739  | 803  | -1739 |
| <b>28</b>       | -573,313651  | -573,061033  | -572,81281   | -572,686886  | 2096 | -1348 | 2594 | -853  | 629  | -1404 |
| 5'dAdo'         | -888,524515  | -            | -            | -887,866057  | -    | -     | -    | -     | 2060 | -1902 |
| CH <sub>3</sub> | -40,510798   | -40,16991    | -39,954431   | -39,848654   | 3606 | -2786 | 4996 | -1402 | 0    | 0     |

**Table S4:** The AIM charge of H-atom in the substrate ( $q_{\text{H}}(\text{substrate})$ ) as well as in the TS of the reaction between AH (substrate or 5'dAdoH) and the methyl radical ( $q_{\text{H}}(\text{substrate})|_{\text{TS}}$ );  $\Delta q_{\text{H}}(\text{substrate})|_{\text{polarization}}$  – charge polarization on H-atom, *i.e.*, the change of the charge on H along the R-to-TS trajectory but in the absence of the methyl radical at the TS (single point calculation of the substrate geometry at the TS);  $\Delta q_{\text{H}}|_{\text{R-to-TS}}$  – the change of charge of H-atom in going from separated reactants to TS; charge polarization corrected  $\Delta q_{\text{H}}|_{\text{R-to-TS}}$  – the difference of the 4<sup>th</sup> and 3<sup>rd</sup> column;  $\Delta q_{\text{CH}_3}|_{\text{R-to-TS}}$  – the change of charge on the methyl radical going from separated reactants to TS; the  $\Delta Q'$  and  $\Delta Q''$  are the charge redistribution descriptors defined in the main text.

| Substrates | $q_{\text{H}}(\text{substrate})$ | $q_{\text{H}}(\text{substrate}) _{\text{TS}}$ | $\Delta q_{\text{H}}(\text{substrate}) _{\text{polarization}}$ | $\Delta q_{\text{H}} _{\text{R-to-TS}}$ | <b>Polarization-</b><br><b>corrected</b>       | $\Delta q_{\text{CH}_3} _{\text{R-to-TS}}$ | $\Delta Q'$ | $\Delta Q''$ |
|------------|----------------------------------|-----------------------------------------------|----------------------------------------------------------------|-----------------------------------------|------------------------------------------------|--------------------------------------------|-------------|--------------|
|            | (e)                              | (e)                                           | (e)                                                            | (e)                                     | $\Delta q_{\text{H}} _{\text{R-to-TS}}$<br>(e) | (e)                                        | (e)         | (e)          |
| <b>1A</b>  | 0,012                            | -0,002                                        | -0,014                                                         | 0,128                                   | 0,142                                          | -0,068                                     | 0,1049      | 0,0056       |
| <b>1B</b>  | 0,011                            | -0,003                                        | -0,014                                                         | 0,129                                   | 0,143                                          | -0,069                                     | 0,1056      | 0,0063       |
| <b>2A</b>  | 0,069                            | 0,060                                         | -0,009                                                         | 0,084                                   | 0,093                                          | -0,034                                     | 0,0634      | -0,0359      |
| <b>2B</b>  | 0,027                            | 0,002                                         | -0,026                                                         | 0,115                                   | 0,140                                          | -0,083                                     | 0,1119      | 0,0127       |
| <b>2C</b>  | -0,007                           | -0,042                                        | -0,034                                                         | 0,137                                   | 0,172                                          | -0,124                                     | 0,1479      | 0,0487       |
| <b>3</b>   | -0,019                           | -0,041                                        | -0,022                                                         | 0,15004                                 | 0,172                                          | -0,10114                                   | 0,1366      | 0,0373       |
| <b>4</b>   | 0,063                            | 0,063                                         | 0,000                                                          | 0,087                                   | 0,087                                          | -0,031                                     | 0,0590      | -0,0402      |
| <b>5</b>   | 0,009                            | -0,013                                        | -0,022                                                         | 0,1323                                  | 0,154                                          | -0,0879                                    | 0,1211      | 0,0218       |
| <b>6A</b>  | 0,012                            | -0,009                                        | -0,020                                                         | 0,1265                                  | 0,147                                          | -0,0774                                    | 0,1122      | 0,0129       |
| <b>6B</b>  | 0,019                            | -0,013                                        | -0,032                                                         | 0,1179                                  | 0,150                                          | -0,0815                                    | 0,1158      | 0,0166       |
| <b>6C</b>  | 0,033                            | 0,018                                         | -0,015                                                         | 0,11058                                 | 0,126                                          | -0,057                                     | 0,0915      | -0,0078      |
| <b>6D</b>  | 0,008                            | -0,031                                        | -0,039                                                         | 0,1295                                  | 0,169                                          | -0,1025                                    | 0,1355      | 0,0363       |
| <b>7A</b>  | 0,042                            | 0,036                                         | -0,006                                                         | 0,085                                   | 0,091                                          | -0,054                                     | 0,0725      | -0,0268      |
| <b>7B</b>  | -0,008                           | -0,027                                        | -0,020                                                         | 0,124                                   | 0,143                                          | -0,122                                     | 0,1327      | 0,0334       |
| <b>8A</b>  | 0,031                            | 0,009                                         | -0,021                                                         | 0,111                                   | 0,132                                          | -0,078                                     | 0,1050      | 0,0058       |
| <b>8B</b>  | 0,029                            | 0,007                                         | -0,022                                                         | 0,112                                   | 0,134                                          | -0,081                                     | 0,1071      | 0,0079       |
| <b>9</b>   | 0,053                            | 0,060                                         | 0,007                                                          | 0,084                                   | 0,077                                          | -0,010                                     | 0,0435      | -0,0557      |

|            |        |        |        |       |       |        |        |         |
|------------|--------|--------|--------|-------|-------|--------|--------|---------|
| <b>10A</b> | 0,011  | -0,006 | -0,017 | 0,131 | 0,148 | -0,077 | 0,1126 | 0,0133  |
| <b>10B</b> | -0,010 | -0,036 | -0,026 | 0,150 | 0,176 | -0,105 | 0,1407 | 0,0414  |
| <b>11A</b> | 0,022  | 0,004  | -0,018 | 0,114 | 0,132 | -0,084 | 0,1081 | 0,0089  |
| <b>11B</b> | 0,007  | -0,011 | -0,018 | 0,129 | 0,147 | -0,102 | 0,1246 | 0,0254  |
| <b>12A</b> | 0,057  | 0,045  | -0,012 | 0,097 | 0,109 | -0,065 | 0,0869 | -0,0124 |
| <b>12B</b> | 0,027  | 0,004  | -0,023 | 0,113 | 0,136 | -0,080 | 0,1083 | 0,0091  |
| <b>13A</b> | 0,035  | 0,008  | -0,027 | 0,105 | 0,132 | -0,072 | 0,1021 | 0,0028  |
| <b>13B</b> | 0,062  | 0,052  | -0,010 | 0,092 | 0,103 | -0,053 | 0,0777 | -0,0216 |
| <b>13C</b> | 0,006  | -0,024 | -0,030 | 0,127 | 0,157 | -0,102 | 0,1296 | 0,0303  |
| <b>13D</b> | 0,055  | 0,037  | -0,019 | 0,099 | 0,118 | -0,074 | 0,0959 | -0,0034 |
| <b>14A</b> | 0,071  | 0,084  | 0,013  | 0,080 | 0,067 | 0,005  | 0,0357 | -0,0635 |
| <b>14B</b> | 0,018  | 0,015  | -0,003 | 0,124 | 0,127 | -0,068 | 0,0975 | -0,0018 |
| <b>15</b>  | 0,042  | 0,026  | -0,016 | 0,097 | 0,113 | -0,060 | 0,0867 | -0,0125 |
| <b>16</b>  | 0,031  | -0,004 | -0,034 | 0,112 | 0,146 | -0,090 | 0,1179 | 0,0186  |
| <b>17A</b> | 0,028  | 0,006  | -0,022 | 0,115 | 0,137 | -0,081 | 0,1091 | 0,0099  |
| <b>17B</b> | 0,0183 | -0,010 | -0,029 | 0,121 | 0,150 | -0,098 | 0,1243 | 0,0250  |
| <b>17C</b> | 0,0139 | -0,018 | -0,032 | 0,127 | 0,159 | -0,108 | 0,1334 | 0,0341  |
| <b>18</b>  | 0,024  | 0,030  | 0,006  | 0,116 | 0,111 | -0,047 | 0,0789 | -0,0204 |
| <b>19</b>  | 0,043  | 0,027  | -0,016 | 0,112 | 0,128 | -0,080 | 0,1039 | 0,0047  |
| <b>20</b>  | 0,042  | 0,027  | -0,015 | 0,100 | 0,115 | -0,048 | 0,0813 | -0,0179 |
| <b>21A</b> | 0,036  | 0,010  | -0,026 | 0,107 | 0,133 | -0,073 | 0,1031 | 0,0039  |
| <b>21B</b> | 0,009  | -0,025 | -0,034 | 0,126 | 0,160 | -0,107 | 0,1335 | 0,0343  |
| <b>21C</b> | -0,021 | -0,062 | -0,041 | 0,145 | 0,186 | -0,142 | 0,1639 | 0,0647  |
| <b>22A</b> | 0,023  | 0,014  | -0,009 | 0,107 | 0,116 | -0,058 | 0,0871 | -0,0121 |
| <b>22B</b> | 0,002  | -0,008 | -0,011 | 0,133 | 0,144 | -0,091 | 0,1174 | 0,0182  |
| <b>22C</b> | 0,049  | 0,043  | -0,005 | 0,088 | 0,093 | -0,029 | 0,0609 | -0,0383 |
| <b>22D</b> | 0,019  | 0,007  | -0,011 | 0,118 | 0,130 | -0,065 | 0,0973 | -0,0019 |
| <b>23A</b> | 0,049  | 0,058  | 0,009  | 0,089 | 0,080 | -0,002 | 0,0413 | -0,0580 |
| <b>23B</b> | -0,004 | -0,012 | -0,008 | 0,135 | 0,143 | -0,077 | 0,1099 | 0,0107  |
| <b>24</b>  | 0,049  | 0,049  | 0,000  | 0,090 | 0,090 | -0,029 | 0,0599 | -0,0393 |

|                |       |       |        |       |       |        |        |         |
|----------------|-------|-------|--------|-------|-------|--------|--------|---------|
| <b>25</b>      | 0,041 | 0,013 | -0,027 | 0,098 | 0,125 | -0,064 | 0,0943 | -0,0049 |
| <b>26</b>      | 0,040 | 0,024 | -0,016 | 0,115 | 0,131 | -0,084 | 0,1074 | 0,0082  |
| <b>27</b>      | 0,049 | 0,056 | 0,008  | 0,086 | 0,078 | -0,017 | 0,0476 | -0,0517 |
| <b>28</b>      | 0,049 | 0,058 | 0,008  | 0,088 | 0,080 | -0,018 | 0,0487 | -0,0505 |
| <b>5'dAdoH</b> | 0,012 | 0,010 | -0,001 | 0,134 | 0,135 | -0,064 | 0,0992 | -       |

**Table S5:** The AIM charge of H-atom in the substrate ( $q_{\text{H}}(\text{substrate})$ ) as well as in the TS of the reaction between substrate and the 5'-deoxyadenosyl radical ( $q_{\text{H}}(\text{substrate})|_{\text{TS}}$ );  $\Delta q_{\text{H}}(\text{substrate})|_{\text{polarization}}$  – charge polarization on H-atom, *i.e.*, the change of the charge on H along the R-to-TS trajectory but in the absence of the 5'-deoxyadenosyl at the TS (single point calculation of the substrate geometry at the TS);  $\Delta q_{\text{H}}|_{\text{R-to-TS}}$  – the change of charge of H-atom in going from separated reactants to TS; charge polarization corrected  $\Delta q_{\text{H}}|_{\text{R-to-TS}}$  – the difference of the 4<sup>th</sup> and 3<sup>rd</sup> column;  $\Delta q_{5'/\text{dAdo}}|_{\text{R-to-TS}}$  – the change of charge on the 5'-deoxyadenosyl radical going from separated reactants to TS; the  $\Delta Q^*$  and  $\Delta Q^{**}$  are the charge redistribution descriptors defined in the main text.

| Substrates | $q_{\text{H}}(\text{substrate})$ | $q_{\text{H}}(\text{substrate}) _{\text{TS}}$ | $\Delta q_{\text{H}}(\text{substrate}) _{\text{polarization}}$ | $\Delta q_{\text{H}} _{\text{R-to-TS}}$ | <b>Polarization-<br/>corrected</b>             | $\Delta q_{5'/\text{dAdo}} _{\text{R-to-TS}}$ | $\Delta Q^*$ | $\Delta Q^{**}$ |
|------------|----------------------------------|-----------------------------------------------|----------------------------------------------------------------|-----------------------------------------|------------------------------------------------|-----------------------------------------------|--------------|-----------------|
|            | (e)                              | (e)                                           | (e)                                                            | (e)                                     | $\Delta q_{\text{H}} _{\text{R-to-TS}}$<br>(e) | (e)                                           | (e)          | (e)             |
| <b>1A</b>  | 0,012                            | -0,005                                        | -0,017                                                         | 0,130                                   | 0,147                                          | -0,079                                        | 0,1130       | 0,0086          |
| <b>1B</b>  | 0,011                            | -0,006                                        | -0,017                                                         | 0,130                                   | 0,148                                          | -0,079                                        | 0,1135       | 0,0090          |
| <b>2A</b>  | 0,069                            | 0,056                                         | -0,013                                                         | 0,084                                   | 0,097                                          | -0,047                                        | 0,0720       | -0,0325         |
| <b>2B</b>  | 0,027                            | -0,004                                        | -0,031                                                         | 0,117                                   | 0,148                                          | -0,104                                        | 0,1259       | 0,0214          |
| <b>2C</b>  | -0,007                           | -0,049                                        | -0,042                                                         | 0,142                                   | 0,184                                          | -0,151                                        | 0,1672       | 0,0628          |
| <b>3</b>   | -0,019                           | -0,046                                        | -0,027                                                         | 0,153                                   | 0,180                                          | -0,103                                        | 0,1415       | 0,0371          |
| <b>4</b>   | 0,063                            | 0,052                                         | -0,011                                                         | 0,092                                   | 0,103                                          | -0,059                                        | 0,0811       | -0,0233         |
| <b>5</b>   | 0,009                            | -0,015                                        | -0,024                                                         | 0,134                                   | 0,158                                          | -0,107                                        | 0,1324       | 0,0280          |
| <b>6A</b>  | 0,012                            | -0,007                                        | -0,019                                                         | 0,131                                   | 0,150                                          | -0,071                                        | 0,1102       | 0,0058          |
| <b>6B</b>  | 0,019                            | -0,016                                        | -0,035                                                         | 0,121                                   | 0,156                                          | -0,102                                        | 0,1288       | 0,0244          |
| <b>6C</b>  | 0,033                            | 0,014                                         | -0,019                                                         | 0,109                                   | 0,128                                          | -0,074                                        | 0,1009       | -0,0036         |
| <b>6D</b>  | 0,008                            | -0,035                                        | -0,043                                                         | 0,133                                   | 0,176                                          | -0,141                                        | 0,1584       | 0,0539          |
| <b>7A</b>  | 0,042                            | 0,030                                         | -0,012                                                         | 0,092                                   | 0,103                                          | -0,088                                        | 0,0957       | -0,0087         |
| <b>7B</b>  | -0,008                           | -0,036                                        | -0,028                                                         | 0,134                                   | 0,162                                          | -0,160                                        | 0,1609       | 0,0564          |
| <b>8A</b>  | 0,031                            | 0,001                                         | -0,030                                                         | 0,110                                   | 0,140                                          | -0,105                                        | 0,1226       | 0,0181          |
| <b>8B</b>  | 0,029                            | -0,001                                        | -0,030                                                         | 0,112                                   | 0,142                                          | -0,111                                        | 0,1263       | 0,0219          |
| <b>9</b>   | 0,053                            | 0,057                                         | 0,004                                                          | 0,087                                   | 0,082                                          | -0,015                                        | 0,0486       | -0,0559         |

|            |        |        |        |       |       |        |        |         |
|------------|--------|--------|--------|-------|-------|--------|--------|---------|
| <b>10A</b> | 0,011  | -0,010 | -0,021 | 0,134 | 0,154 | -0,091 | 0,1226 | 0,0181  |
| <b>10B</b> | -0,010 | -0,039 | -0,028 | 0,152 | 0,180 | -0,131 | 0,1553 | 0,0509  |
| <b>11A</b> | 0,022  | 0,006  | -0,016 | 0,119 | 0,135 | -0,104 | 0,1195 | 0,0150  |
| <b>11B</b> | 0,007  | -0,017 | -0,024 | 0,132 | 0,155 | -0,141 | 0,1483 | 0,0438  |
| <b>12A</b> | 0,057  | 0,037  | -0,020 | 0,098 | 0,118 | -0,086 | 0,1020 | -0,0025 |
| <b>12B</b> | 0,027  | -0,002 | -0,030 | 0,114 | 0,143 | -0,095 | 0,1194 | 0,0149  |
| <b>13A</b> | 0,035  | -0,010 | -0,045 | 0,101 | 0,146 | -0,074 | 0,1097 | 0,0053  |
| <b>13B</b> | 0,062  | 0,049  | -0,013 | 0,078 | 0,092 | -0,064 | 0,0777 | -0,0267 |
| <b>13C</b> | 0,006  | -0,032 | -0,038 | 0,130 | 0,168 | -0,122 | 0,1451 | 0,0406  |
| <b>13D</b> | 0,055  | 0,030  | -0,025 | 0,104 | 0,129 | -0,103 | 0,1161 | 0,0116  |
| <b>14A</b> | 0,071  | 0,081  | 0,010  | 0,080 | 0,070 | -0,008 | 0,0392 | -0,0652 |
| <b>14B</b> | 0,018  | 0,013  | -0,005 | 0,128 | 0,133 | -0,102 | 0,1175 | 0,0130  |
| <b>15</b>  | 0,042  | 0,016  | -0,026 | 0,106 | 0,132 | -0,093 | 0,1126 | 0,0081  |
| <b>16</b>  | 0,031  | -0,012 | -0,042 | 0,115 | 0,158 | -0,113 | 0,1354 | 0,0309  |
| <b>17A</b> | 0,028  | 0,000  | -0,028 | 0,115 | 0,143 | -0,104 | 0,1237 | 0,0193  |
| <b>17B</b> | 0,0183 | -0,005 | -0,023 | 0,129 | 0,152 | -0,115 | 0,1334 | 0,0290  |
| <b>17C</b> | 0,0139 | -0,010 | -0,024 | 0,136 | 0,160 | -0,124 | 0,1420 | 0,0376  |
| <b>18</b>  | 0,024  | 0,025  | 0,000  | 0,118 | 0,118 | -0,081 | 0,0996 | -0,0049 |
| <b>19</b>  | 0,043  | 0,022  | -0,020 | 0,115 | 0,135 | -0,097 | 0,1159 | 0,0114  |
| <b>20</b>  | 0,042  | 0,023  | -0,019 | 0,104 | 0,123 | -0,049 | 0,0856 | -0,0188 |
| <b>21A</b> | 0,036  | 0,001  | -0,034 | 0,109 | 0,143 | -0,110 | 0,1267 | 0,0222  |
| <b>21B</b> | 0,009  | -0,035 | -0,044 | 0,130 | 0,174 | -0,137 | 0,1554 | 0,0509  |
| <b>21C</b> | -0,021 | -0,070 | -0,049 | 0,148 | 0,197 | -0,164 | 0,1805 | 0,0761  |
| <b>22A</b> | 0,023  | 0,013  | -0,010 | 0,112 | 0,122 | -0,046 | 0,0839 | -0,0205 |
| <b>22B</b> | 0,002  | -0,016 | -0,018 | 0,135 | 0,153 | -0,110 | 0,1311 | 0,0267  |
| <b>22C</b> | 0,049  | 0,044  | -0,004 | 0,090 | 0,095 | 0,017  | 0,0558 | -0,0487 |
| <b>22D</b> | 0,019  | 0,005  | -0,013 | 0,120 | 0,133 | -0,083 | 0,1082 | 0,0037  |
| <b>23A</b> | 0,049  | 0,061  | 0,011  | 0,094 | 0,082 | -0,002 | 0,0418 | -0,0626 |
| <b>23B</b> | -0,004 | -0,014 | -0,010 | 0,139 | 0,149 | -0,076 | 0,1125 | 0,0081  |
| <b>24</b>  | 0,049  | 0,045  | -0,004 | 0,090 | 0,095 | -0,029 | 0,0618 | -0,0427 |

|           |       |       |        |       |       |        |        |         |
|-----------|-------|-------|--------|-------|-------|--------|--------|---------|
| <b>25</b> | 0,041 | 0,016 | -0,025 | 0,096 | 0,120 | -0,054 | 0,0872 | -0,0172 |
| <b>26</b> | 0,040 | 0,019 | -0,021 | 0,117 | 0,138 | -0,111 | 0,1246 | 0,0202  |
| <b>27</b> | 0,049 | 0,050 | 0,001  | 0,086 | 0,084 | -0,025 | 0,0546 | -0,0499 |
| <b>28</b> | 0,049 | 0,052 | 0,003  | 0,088 | 0,085 | -0,028 | 0,0563 | -0,0481 |

---



**Table S6:** The key off-diagonal thermodynamic characteristics for the HAA reactions of substrates with the 5'-deoxyadenosyl radical.

| Reaction:<br>5'dAdo'<br>+<br>Substrates | $\sigma$<br>(mV) | $\eta$<br>(mV) | $\Delta E^\circ$<br>$=\frac{1}{\sqrt{2}}(\sigma + \eta)$<br>(mV) | $(RT/F)\ln 10 \Delta pK_{a,A^\cdot}$<br>$=\frac{1}{\sqrt{2}}(\sigma - \eta)$<br>(mV) | $\frac{1}{4}( \sigma  -  \eta )$<br>$=\Delta G_{\text{offdiag}}^\ddagger$<br>(kcal mol <sup>-1</sup> ) |
|-----------------------------------------|------------------|----------------|------------------------------------------------------------------|--------------------------------------------------------------------------------------|--------------------------------------------------------------------------------------------------------|
| <b>1A</b>                               | -37,6            | 138,3          | 71,2                                                             | -124,3                                                                               | -0,6                                                                                                   |
| <b>1B</b>                               | 516,2            | -484,5         | 22,4                                                             | 707,6                                                                                | 0,2                                                                                                    |
| <b>2A</b>                               | 188,2            | 718,7          | 641,3                                                            | -375,1                                                                               | -3,1                                                                                                   |
| <b>2B</b>                               | -66,9            | -253,4         | -226,4                                                           | 131,9                                                                                | -1,1                                                                                                   |
| <b>2C</b>                               | -256,2           | -975,0         | -870,6                                                           | 508,3                                                                                | -4,1                                                                                                   |
| <b>3</b>                                | -962,0           | 17,8           | -667,6                                                           | -692,8                                                                               | 5,4                                                                                                    |
| <b>4</b>                                | -181,5           | 1153,8         | 687,6                                                            | -944,2                                                                               | -5,6                                                                                                   |
| <b>5</b>                                | -136,4           | -578,7         | -505,6                                                           | 312,7                                                                                | -2,5                                                                                                   |
| <b>6A</b>                               | 195,4            | -577,6         | -270,3                                                           | 546,6                                                                                | -2,2                                                                                                   |
| <b>6B</b>                               | -23,6            | -524,5         | -387,5                                                           | 354,2                                                                                | -2,9                                                                                                   |
| <b>6C</b>                               | -252,4           | 412,3          | 113,1                                                            | -470,0                                                                               | -0,9                                                                                                   |
| <b>6D</b>                               | -74,4            | -1014,8        | -770,2                                                           | 665,0                                                                                | -5,4                                                                                                   |
| <b>7A</b>                               | 425,3            | -122,1         | 214,4                                                            | 387,1                                                                                | 1,7                                                                                                    |
| <b>7B</b>                               | 240,2            | -1421,0        | -835,0                                                           | 1174,6                                                                               | -6,8                                                                                                   |
| <b>8A</b>                               | -993,1           | 663,5          | -233,0                                                           | -1171,4                                                                              | 1,9                                                                                                    |
| <b>8B</b>                               | -188,1           | -265,0         | -320,4                                                           | 54,3                                                                                 | -0,4                                                                                                   |
| <b>9</b>                                | 300,7            | 955,4          | 888,2                                                            | -462,9                                                                               | -3,8                                                                                                   |
| <b>10A</b>                              | 556,5            | -709,1         | -107,9                                                           | 895,0                                                                                | -0,9                                                                                                   |
| <b>10B</b>                              | 388,2            | -1295,6        | -641,6                                                           | 1190,6                                                                               | -5,2                                                                                                   |
| <b>11A</b>                              | 38,5             | -360,4         | -227,6                                                           | 282,0                                                                                | -1,9                                                                                                   |
| <b>11B</b>                              | -254,1           | -793,6         | -740,8                                                           | 381,5                                                                                | -3,1                                                                                                   |
| <b>12A</b>                              | 86,4             | 560,2          | 457,2                                                            | -335,1                                                                               | -2,7                                                                                                   |
| <b>12B</b>                              | -699,6           | 338,2          | -255,6                                                           | -733,8                                                                               | 2,1                                                                                                    |
| <b>13A</b>                              | -179,2           | 432,9          | 179,4                                                            | -432,8                                                                               | -1,5                                                                                                   |

|            |        |         |         |         |      |
|------------|--------|---------|---------|---------|------|
| <b>13B</b> | -207,9 | 547,2   | 239,9   | -533,9  | -2,0 |
| <b>13C</b> | -159,7 | -607,1  | -542,2  | 316,4   | -2,6 |
| <b>13D</b> | 17,4   | 67,6    | 60,1    | -35,5   | -0,3 |
| <b>14A</b> | 1140,1 | 755,8   | 1340,6  | 271,7   | 2,2  |
| <b>14B</b> | 9,0    | 35,7    | 31,6    | -18,9   | -0,2 |
| <b>15</b>  | 65,3   | 250,2   | 223,1   | -130,8  | -1,1 |
| <b>16</b>  | -384,1 | -157,5  | -382,9  | -160,2  | 1,3  |
| <b>17A</b> | -178,8 | 78,9    | -70,7   | -182,2  | 0,6  |
| <b>17B</b> | -95,8  | -160,2  | -181,0  | 45,5    | -0,4 |
| <b>17C</b> | 425,0  | -1116,2 | -488,8  | 1089,8  | -4,0 |
| <b>18</b>  | 1222,5 | -755,0  | 330,6   | 1398,4  | 2,7  |
| <b>19</b>  | -59,2  | 337,4   | 196,7   | -280,4  | -1,6 |
| <b>20</b>  | 664,4  | -20,5   | 455,3   | 484,3   | 3,7  |
| <b>21A</b> | -20,9  | -78,1   | -69,9   | 40,4    | -0,3 |
| <b>21B</b> | -877,0 | -223,7  | -778,3  | -461,9  | 3,8  |
| <b>21C</b> | -188,2 | -1629,1 | -1285,0 | 1018,9  | -8,3 |
| <b>22A</b> | 63,2   | 242,2   | 215,9   | -126,6  | -1,0 |
| <b>22B</b> | -96,1  | -364,7  | -325,8  | 189,9   | -1,5 |
| <b>22C</b> | 201,1  | 767,8   | 685,1   | -400,7  | -3,3 |
| <b>22D</b> | -47,3  | 287,4   | 169,8   | -236,7  | -1,4 |
| <b>23A</b> | 964,4  | 663,2   | 1150,9  | 213,0   | 1,7  |
| <b>23B</b> | 240,8  | -482,8  | -171,1  | 511,6   | -1,4 |
| <b>24</b>  | -375,3 | 1124,7  | 529,9   | -1060,7 | -4,3 |
| <b>25</b>  | -487,2 | 922,8   | 308,0   | -997,0  | -2,5 |
| <b>26</b>  | 0,2    | 161,2   | 114,2   | -113,8  | -0,9 |
| <b>27</b>  | -162,5 | 1257,3  | 774,1   | -1003,9 | -6,3 |
| <b>28</b>  | -497,4 | 1430,7  | 660,0   | -1363,4 | -5,4 |

---

**Table S7:** Energetics of the HAA reactions of substrates with the 5'-deoxyadenosyl radical: free energies of separated reactants, separated products, reactant complexes (RC) and product complexes (PC), free energies of formation of RC and PC, the free energy of reaction in going from separated reactants to separated products as well as the free energy of reaction in going from RC to PC.

| Substrates | $G_{A-H}$<br>(au) | $G_{A\cdot}$<br>(au) | $G_{RC}$<br>(au) | $G_{TS}$<br>(au) | $G_{PC}$<br>(au) | $w_R$<br>(kcal mol <sup>-1</sup> ) | $w_P$<br>(kcal mol <sup>-1</sup> ) | $\Delta G_{0,inf}$<br>(kcal mol <sup>-1</sup> ) | $\Delta G_0$<br>(kcal mol <sup>-1</sup> ) |
|------------|-------------------|----------------------|------------------|------------------|------------------|------------------------------------|------------------------------------|-------------------------------------------------|-------------------------------------------|
| <b>1A</b>  | -727,241716       | -726,584547          | -1615,102289     | -1615,07224      | -1615,107969     | 1,5                                | -1,2                               | -0,8                                            | -3,6                                      |
| <b>1B</b>  | -726,782138       | -726,126680          | -1614,640354     | -1614,611336     | -1614,647614     | 3,0                                | 0,3                                | -1,9                                            | -4,6                                      |
| <b>2A</b>  | -1345,866283      | -1345,212363         | -2233,72678      | -2233,700594     | -2233,731977     | 1,6                                | 1,2                                | -2,8                                            | -3,3                                      |
| <b>2B</b>  | -1345,425120      | -1344,778612         | -2233,283188     | -2233,263866     | -2233,296494     | 3,1                                | 2,3                                | -7,5                                            | -8,3                                      |
| <b>2C</b>  | -1344,948090      | -1344,307529         | -2232,805574     | -2232,789297     | -2232,822895     | 3,5                                | 3,8                                | -11,2                                           | -10,9                                     |
| <b>3</b>   | -484,400052       | -483,750066          | -1372,258855     | -1372,236261     | -1372,267719     | 2,7                                | 2,4                                | -5,3                                            | -5,6                                      |
| <b>4</b>   | -456,641906       | -456,001921          | -1344,488977     | -1344,470505     | -1344,507733     | 10,0                               | 9,8                                | -11,6                                           | -11,8                                     |
| <b>5</b>   | -535,180756       | -534,529912          | -1423,034405     | -1423,012618     | -1423,039191     | 5,9                                | 7,7                                | -4,8                                            | -3,0                                      |
| <b>6A</b>  | -589,418483       | -588,766181          | -1477,277073     | -1477,254172     | -1477,284418     | 2,8                                | 2,0                                | -3,9                                            | -4,6                                      |
| <b>6B</b>  | -589,425053       | -588,773336          | -1477,276038     | -1477,25757      | -1477,285193     | 7,6                                | 6,0                                | -4,2                                            | -5,7                                      |
| <b>6C</b>  | -589,875855       | -589,223152          | -1477,730261     | -1477,708813     | -1477,738028     | 5,4                                | 4,1                                | -3,6                                            | -4,9                                      |
| <b>6D</b>  | -588,964250       | -588,311994          | -1476,816445     | -1476,795815     | -1476,824231     | 6,8                                | 5,8                                | -3,9                                            | -4,9                                      |
| <b>7A</b>  | -771,855779       | -771,247420          | -1659,718224     | -1659,709848     | -1659,767953     | 0,4                                | 0,6                                | -31,4                                           | -31,2                                     |
| <b>7B</b>  | -771,405695       | -770,783421          | -1659,266811     | -1659,25677      | -1659,303143     | 1,2                                | 1,1                                | -22,7                                           | -22,8                                     |
| <b>8A</b>  | -1069,948519      | -1069,308628         | -1957,812229     | -1957,791351     | -1957,833103     | -0,4                               | -1,9                               | -11,7                                           | -13,1                                     |
| <b>8B</b>  | -1069,496615      | -1068,856390         | -1957,355857     | -1957,338495     | -1957,376448     | 2,4                                | 0,9                                | -11,4                                           | -12,9                                     |
| <b>9</b>   | -972,762990       | -972,130414          | -1860,623963     | -1860,602025     | -1860,647509     | 1,3                                | 2,8                                | -16,2                                           | -14,8                                     |
| <b>10A</b> | -670,443099       | -669,785617          | -1558,305099     | -1558,274514     | -1558,309823     | 0,6                                | -1,7                               | -0,6                                            | -3,0                                      |
| <b>10B</b> | -669,985024       | -669,329376          | -1557,845117     | -1557,815884     | -1557,84967      | 1,8                                | 0,7                                | -1,8                                            | -2,9                                      |
| <b>11A</b> | -670,443099       | -669,808166          | -1558,30783      | -1558,282821     | -1558,330327     | -1,1                               | -0,4                               | -14,8                                           | -14,1                                     |
| <b>11B</b> | -669,983578       | -669,352163          | -1557,844267     | -1557,82528      | -1557,866343     | 1,5                                | 4,6                                | -17,0                                           | -13,9                                     |
| <b>12A</b> | -894,155892       | -893,512954          | -1782,01745      | -1781,994069     | -1782,030903     | 0,9                                | 2,2                                | -9,7                                            | -8,4                                      |
| <b>12B</b> | -571,176637       | -570,535147          | -1459,037145     | -1459,01587      | -1459,053932     | 1,6                                | 1,7                                | -10,6                                           | -10,5                                     |

|                  |              |              |              |              |              |      |      |       |       |
|------------------|--------------|--------------|--------------|--------------|--------------|------|------|-------|-------|
| <b>13A</b>       | -1080,031227 | -1079,383738 | -1967,894206 | -1967,87483  | -1967,905332 | 0,0  | -0,1 | -6,9  | -7,0  |
| <b>13B</b>       | -1080,026310 | -1079,386351 | -1967,887872 | -1967,866582 | -1967,910026 | 0,9  | -1,4 | -11,6 | -13,9 |
| <b>13C</b>       | -1079,588831 | -1078,945807 | -1967,446619 | -1967,430627 | -1967,459894 | 3,3  | 4,6  | -9,7  | -8,3  |
| <b>13D</b>       | -1079,580517 | -1078,942906 | -1967,442405 | -1967,41579  | -1967,458659 | 0,7  | 3,6  | -13,1 | -10,2 |
| <b>14A</b>       | -515,79764   | -515,155083  | -1403,65575  | -1403,638947 | -1403,671901 | 3,1  | 2,9  | -10,0 | -10,1 |
| <b>14B</b>       | -515,344869  | -514,700463  | -1403,203144 | -1403,182577 | -1403,216572 | 3,0  | 3,4  | -8,8  | -8,4  |
| <b>15</b>        | -2742,720036 | -2742,077613 | -3630,584984 | -3630,56273  | -3630,595577 | -1,2 | 2,2  | -10,1 | -6,6  |
| <b>16</b>        | -706,757144  | -706,110260  | -1594,613379 | -1594,592807 | -1594,624169 | 4,3  | 4,8  | -7,3  | -6,8  |
| <b>17A</b>       | -1160,106434 | -1159,459630 | -2047,966362 | -2047,943972 | -2047,983763 | 1,9  | -1,7 | -7,3  | -10,9 |
| <b>17B</b>       | -1159,670880 | -1159,021162 | -2047,525748 | -2047,506459 | -2047,537634 | 5,1  | 3,1  | -5,5  | -7,5  |
| <b>17C</b>       | -1159,193514 | -1158,543155 | -2047,044223 | -2047,026166 | -2047,05617  | 7,7  | 5,3  | -5,1  | -7,5  |
| <b>18</b>        | -1455,495986 | -1454,840884 | -2343,35596  | -2343,330349 | -2343,363707 | 1,9  | -0,8 | -2,1  | -4,9  |
| <b>19</b>        | -933,455907  | -932,810726  | -1821,315023 | -1821,293126 | -1821,32603  | 2,5  | 3,9  | -8,3  | -6,9  |
| <b>20</b>        | -1039,049308 | -1038,398924 | -1926,908908 | -1926,886022 | -1926,919307 | 2,2  | 0,7  | -5,1  | -6,5  |
| <b>21A</b>       | -722,934997  | -722,290040  | -1610,792547 | -1610,768673 | -1610,803034 | 3,4  | 5,3  | -8,5  | -6,6  |
| <b>21B</b>       | -722,494297  | -721,851339  | -1610,349972 | -1610,3286   | -1610,365423 | 4,6  | 4,6  | -9,7  | -9,7  |
| <b>21C</b>       | -722,012937  | -721,372732  | -1609,876135 | -1609,851684 | -1609,893492 | -0,1 | 0,5  | -11,5 | -10,9 |
| <b>22A</b>       | -630,153928  | -629,521975  | -1518,019064 | -1517,998845 | -1518,044813 | -1,3 | -0,8 | -16,6 | -16,2 |
| <b>22B</b>       | -629,701211  | -629,067571  | -1517,558565 | -1517,53948  | -1517,585442 | 3,6  | 2,3  | -15,6 | -16,9 |
| <b>22C</b>       | -630,584311  | -629,951037  | -1518,449007 | -1518,432273 | -1518,474593 | -1,0 | -1,3 | -15,8 | -16,1 |
| <b>22D</b>       | -630,156547  | -629,520584  | -1518,013697 | -1517,993204 | -1518,036245 | 3,7  | 3,7  | -14,1 | -14,1 |
| <b>23A</b>       | -555,108983  | -554,466237  | -1442,969198 | -1442,948563 | -1442,984691 | 1,8  | 1,9  | -9,9  | -9,7  |
| <b>23B</b>       | -554,651992  | -554,007930  | -1442,510501 | -1442,491932 | -1442,523026 | 2,8  | 4,0  | -9,0  | -7,9  |
| <b>24</b>        | -574,540862  | -573,911419  | -1462,401991 | -1462,381252 | -1462,431638 | 1,2  | 0,8  | -18,2 | -18,6 |
| <b>25</b>        | -707,190411  | -706,541845  | -1595,053365 | -1595,03141  | -1595,062787 | 0,0  | 0,3  | -6,2  | -5,9  |
| <b>26</b>        | -1326,048574 | -1325,403981 | -2213,906221 | -2213,882316 | -2213,921201 | 3,4  | 2,7  | -8,7  | -9,4  |
| <b>27</b>        | -727,001719  | -726,371342  | -1614,863037 | -1614,841397 | -1614,889588 | 1,1  | 2,0  | -17,6 | -16,7 |
| <b>28</b>        | -573,313651  | -572,686886  | -1461,172623 | -1461,156028 | -1461,201239 | 2,5  | 4,5  | -19,9 | -18,0 |
| <b>5'dAdo(H)</b> | -888,524515  | -887,866057  | -            | -            | -            | -    | -    | -     | -     |

**Table S8:** Energetics of the HAA reactions of substrates with the 5'-deoxyadenosyl radical: the total HAA barrier for the reaction between a substrate and 5'dAdo• in going from separated reactants to TS (non-tunneling regime); the RC-to-TS part of the HAA barrier (non-tunneling regime); the diagonal thermodynamic contribution to the barrier; the off-diagonal thermodynamic contribution to the barrier; the three-component thermodynamic contribution to the barrier; the intrinsic barrier in the non-tunneling regime (all contributions besides the diagonal one); the  $\Delta G_{00}^\ddagger$  - the intrinsic barrier without the off-diagonal thermodynamic contribution (non-tunneling regime); the tunneling contribution to the barrier. See eq 8 in the main text.

| Reaction:<br>5'dAdo•<br>+<br>Substrates | $\Delta G_{\text{HAA},\text{total}}^\ddagger$<br>(kcal mol <sup>-1</sup> ) | $\Delta G_{\text{HAA}}^\ddagger$<br>(kcal mol <sup>-1</sup> ) | $\Delta G_{\text{diag}}^\ddagger$<br>(kcal mol <sup>-1</sup> ) | $\Delta G_{\text{offdiag}}^\ddagger$<br>$= \frac{1}{4}( \sigma  -  \eta )$<br>(kcal mol <sup>-1</sup> ) | $\Delta G_{\text{thermo}}^\ddagger$<br>(kcal mol <sup>-1</sup> ) | $\Delta G_{\text{intrinsic}}^\ddagger$<br>(kcal mol <sup>-1</sup> ) | $\Delta G_{00}^\ddagger$<br>(kcal mol <sup>-1</sup> ) | $\Delta G_{\text{tun}}^\ddagger$<br>$-RT \ln(\kappa)$<br>(kcal mol <sup>-1</sup> ) |
|-----------------------------------------|----------------------------------------------------------------------------|---------------------------------------------------------------|----------------------------------------------------------------|---------------------------------------------------------------------------------------------------------|------------------------------------------------------------------|---------------------------------------------------------------------|-------------------------------------------------------|------------------------------------------------------------------------------------|
| <b>1A</b>                               | 20,4                                                                       | 18,9                                                          | -1,8                                                           | -0,6                                                                                                    | -2,4                                                             | 20,6                                                                | 21,2                                                  | -2,48                                                                              |
| <b>1B</b>                               | 21,2                                                                       | 18,2                                                          | -2,3                                                           | 0,2                                                                                                     | -2,1                                                             | 20,5                                                                | 20,3                                                  | -2,45                                                                              |
| <b>2A</b>                               | 18,0                                                                       | 16,4                                                          | -1,6                                                           | -3,1                                                                                                    | -4,7                                                             | 18,1                                                                | 21,1                                                  | -2,25                                                                              |
| <b>2B</b>                               | 15,2                                                                       | 12,1                                                          | -4,2                                                           | -1,1                                                                                                    | -5,2                                                             | 16,3                                                                | 17,4                                                  | -1,85                                                                              |
| <b>2C</b>                               | 13,7                                                                       | 10,2                                                          | -5,4                                                           | -4,1                                                                                                    | -9,6                                                             | 15,6                                                                | 19,8                                                  | -1,26                                                                              |
| <b>3</b>                                | 16,8                                                                       | 14,2                                                          | -2,8                                                           | 5,4                                                                                                     | 2,7                                                              | 17,0                                                                | 11,5                                                  | -1,99                                                                              |
| <b>4</b>                                | 21,6                                                                       | 11,6                                                          | -5,9                                                           | -5,6                                                                                                    | -11,5                                                            | 17,5                                                                | 23,1                                                  | -1,62                                                                              |
| <b>5</b>                                | 19,6                                                                       | 13,7                                                          | -1,5                                                           | -2,5                                                                                                    | -4,1                                                             | 15,2                                                                | 17,7                                                  | -1,98                                                                              |
| <b>6A</b>                               | 17,2                                                                       | 14,4                                                          | -2,3                                                           | -2,2                                                                                                    | -4,5                                                             | 16,7                                                                | 18,9                                                  | -1,89                                                                              |
| <b>6B</b>                               | 19,1                                                                       | 11,6                                                          | -2,9                                                           | -2,9                                                                                                    | -5,8                                                             | 14,5                                                                | 17,3                                                  | -1,73                                                                              |
| <b>6C</b>                               | 18,9                                                                       | 13,5                                                          | -2,4                                                           | -0,9                                                                                                    | -3,4                                                             | 15,9                                                                | 16,8                                                  | -1,92                                                                              |
| <b>6D</b>                               | 19,7                                                                       | 12,9                                                          | -2,4                                                           | -5,4                                                                                                    | -7,9                                                             | 15,4                                                                | 20,8                                                  | -1,83                                                                              |
| <b>7A</b>                               | 5,6                                                                        | 5,3                                                           | -15,6                                                          | 1,7                                                                                                     | -13,9                                                            | 20,9                                                                | 19,1                                                  | -0,38                                                                              |
| <b>7B</b>                               | 7,5                                                                        | 6,3                                                           | -11,4                                                          | -6,8                                                                                                    | -18,2                                                            | 17,7                                                                | 24,5                                                  | -0,41                                                                              |
| <b>8A</b>                               | 12,7                                                                       | 13,1                                                          | -6,5                                                           | 1,9                                                                                                     | -4,6                                                             | 19,7                                                                | 17,8                                                  | -2,35                                                                              |
| <b>8B</b>                               | 13,3                                                                       | 10,9                                                          | -6,5                                                           | -0,4                                                                                                    | -6,9                                                             | 17,4                                                                | 17,8                                                  | -1,70                                                                              |

|            |      |      |      |      |       |      |      |       |
|------------|------|------|------|------|-------|------|------|-------|
| <b>9</b>   | 15,1 | 13,8 | -7,4 | -3,8 | -11,2 | 21,2 | 24,9 | -2,05 |
| <b>10A</b> | 19,8 | 19,2 | -1,5 | -0,9 | -2,4  | 20,7 | 21,6 | -2,35 |
| <b>10B</b> | 20,2 | 18,3 | -1,4 | -5,2 | -6,7  | 19,8 | 25,0 | -2,25 |
| <b>11A</b> | 14,6 | 15,7 | -7,1 | -1,9 | -8,9  | 22,8 | 24,6 | -2,08 |
| <b>11B</b> | 13,4 | 11,9 | -6,9 | -3,1 | -10,0 | 18,8 | 22,0 | -1,49 |
| <b>12A</b> | 15,6 | 14,7 | -4,2 | -2,7 | -7,0  | 18,9 | 21,6 | -2,31 |
| <b>12B</b> | 14,9 | 13,4 | -5,3 | 2,1  | -3,2  | 18,6 | 16,5 | -2,10 |
| <b>13A</b> | 12,2 | 12,2 | -3,5 | -1,5 | -5,0  | 15,6 | 17,1 | -1,98 |
| <b>13B</b> | 14,3 | 13,4 | -7,0 | -2,0 | -8,9  | 20,3 | 22,3 | -2,07 |
| <b>13C</b> | 13,3 | 10,0 | -4,2 | -2,6 | -6,7  | 14,2 | 16,8 | -1,53 |
| <b>13D</b> | 17,4 | 16,7 | -5,1 | -0,3 | -5,4  | 21,8 | 22,1 | -2,36 |
| <b>14A</b> | 13,6 | 10,5 | -5,1 | 2,2  | -2,9  | 15,6 | 13,4 | -1,42 |
| <b>14B</b> | 15,9 | 12,9 | -4,2 | -0,2 | -4,4  | 17,1 | 17,3 | -1,79 |
| <b>15</b>  | 12,8 | 14,0 | -3,3 | -1,1 | -4,4  | 17,3 | 18,4 | -2,29 |
| <b>16</b>  | 17,2 | 12,9 | -3,4 | 1,3  | -2,1  | 16,3 | 15,0 | -1,78 |
| <b>17A</b> | 16,0 | 14,0 | -5,5 | 0,6  | -4,9  | 19,5 | 18,9 | -1,99 |
| <b>17B</b> | 17,2 | 12,1 | -3,7 | -0,4 | -4,1  | 15,8 | 16,2 | -1,73 |
| <b>17C</b> | 19,1 | 11,3 | -3,7 | -4,0 | -7,7  | 15,1 | 19,1 | -1,67 |
| <b>18</b>  | 18,0 | 16,1 | -2,4 | 2,7  | 0,3   | 18,5 | 15,8 | -2,51 |
| <b>19</b>  | 16,2 | 13,7 | -3,5 | -1,6 | -5,1  | 17,2 | 18,8 | -2,29 |
| <b>20</b>  | 16,5 | 14,4 | -3,3 | 3,7  | 0,4   | 17,6 | 13,9 | -2,00 |
| <b>21A</b> | 18,4 | 15,0 | -3,3 | -0,3 | -3,6  | 18,3 | 18,6 | -2,01 |
| <b>21B</b> | 18,0 | 13,4 | -4,8 | 3,8  | -1,1  | 18,3 | 14,5 | -1,68 |
| <b>21C</b> | 15,2 | 15,3 | -5,4 | -8,3 | -13,8 | 20,8 | 29,1 | -1,30 |
| <b>22A</b> | 11,4 | 12,7 | -8,1 | -1,0 | -9,1  | 20,8 | 21,8 | -1,71 |
| <b>22B</b> | 15,5 | 12,0 | -8,4 | -1,5 | -10,0 | 20,4 | 22,0 | -1,72 |
| <b>22C</b> | 9,5  | 10,5 | -8,0 | -3,3 | -11,3 | 18,5 | 21,8 | -1,71 |
| <b>22D</b> | 16,5 | 12,9 | -7,1 | -1,4 | -8,5  | 19,9 | 21,3 | -1,91 |
| <b>23A</b> | 14,7 | 12,9 | -4,9 | 1,7  | -3,1  | 17,8 | 16,1 | -1,69 |
| <b>23B</b> | 14,5 | 11,7 | -3,9 | -1,4 | -5,3  | 15,6 | 17,0 | -1,62 |

|           |      |      |      |      |       |      |      |       |
|-----------|------|------|------|------|-------|------|------|-------|
| <b>24</b> | 14,2 | 13,0 | -9,3 | -4,3 | -13,6 | 22,3 | 26,6 | -1,97 |
| <b>25</b> | 13,8 | 13,8 | -3,0 | -2,5 | -5,5  | 16,7 | 19,2 | -1,90 |
| <b>26</b> | 18,4 | 15,0 | -4,7 | -0,9 | -5,6  | 19,7 | 20,6 | -2,29 |
| <b>27</b> | 14,7 | 13,6 | -8,3 | -6,3 | -14,6 | 21,9 | 28,2 | -2,37 |
| <b>28</b> | 13,0 | 10,4 | -9,0 | -5,4 | -14,4 | 19,4 | 24,8 | -1,81 |

**Table S9.** Free energies of substrates and their oxidized, deprotonated and dehydrogenated conjugates, all together forming half-reaction thermodynamic cycles along with the key half-reaction thermodynamic properties, as depicted in **Scheme 4**, calculated with M06 functional. Two off-diagonal thermodynamic factors ( $\eta'$  and  $\sigma'$  - see the equations in the main text) associated with the reaction of the substrate with the methyl radical.

| Subst.     | $G_{A-H}$<br>(au) | $G_{A-H^{++}}$<br>(au) | $G_{A^-}$<br>(au) | $G_{A^\bullet}$<br>(au) | $\left(\frac{RT}{F}\right) \ln 10 pK_{a,AH}$<br>(mV) | $\left(\frac{RT}{F}\right) \ln 10 pK_{a,A}$<br>(mV) | $E_{AH}^\circ$<br>(mV) | $E_A^\circ$<br>(mV) | $\eta'$<br>(mV) | $\sigma'$<br>(mV) |
|------------|-------------------|------------------------|-------------------|-------------------------|------------------------------------------------------|-----------------------------------------------------|------------------------|---------------------|-----------------|-------------------|
| <b>1A</b>  | -726.73722        | -726.493415            | -726.186194       | -726.082069             | 3460                                                 | -337                                                | 2354                   | -1447               | 1767            | -1732             |
| <b>4</b>   | -456.333168       | -456.079726            | -455.822657       | -455.691873             | 2359                                                 | -976                                                | 2617                   | -721                | 803             | -1793             |
| <b>5</b>   | -534.797119       | --                     | -534.233608       | -534.145891             | 3800                                                 | ---                                                 | ---                    | -1893               | ---             | ---               |
| <b>6C</b>  | -589.513097       | -589.266699            | -588.970471       | -588.862057             | 3232                                                 | -519                                                | 2425                   | -1330               | 1556            | -1685             |
| <b>7A</b>  | -771.372853       | -771.200659            | -770.873075       | -770.763976             | 2067                                                 | 352                                                 | 406                    | -1311               | 2158            | -2314             |
| <b>7B</b>  | -770.922147       | -770.765109            | -770.371605       | -770.300596             | 3447                                                 | 1108                                                | -7                     | -2348               | 3426            | -2116             |
| <b>11A</b> | -669.953535       | -669.751476            | -669.408275       | -669.315966             | 3304                                                 | 320                                                 | 1218                   | -1768               | 2459            | -1969             |
| <b>12B</b> | -570.800932       | -570.551141            | -570.254903       | -570.16531              | 3325                                                 | -1031                                               | 2517                   | -1842               | 1556            | -961              |

|                  |              |              |              |              |      |      |      |       |       |       |
|------------------|--------------|--------------|--------------|--------------|------|------|------|-------|-------|-------|
| <b>13D</b>       | -1078.931267 | -1078.76032  | -1078.383448 | -1078.297692 | 3373 | 1057 | 372  | -1946 | 3106  | -2364 |
| <b>15</b>        | -2741.695807 | -2741.48019  | -2741.155562 | -2741.053796 | 3167 | 72   | 1587 | -1511 | -1119 | -1017 |
| <b>16</b>        | -706.313878  | -706.080193  | -705.755454  | -705.668459  | 3661 | -326 | 2079 | -1913 | 2104  | -1409 |
| <b>17C</b>       | -1158.702009 | -1158.506944 | -1158.137738 | -1158.056696 | 3820 | 721  | 1028 | -2075 | 2959  | -2035 |
| <b>21C</b>       | -721.770847  | -721.587962  | -721.185524  | -721.131558  | 4393 | 888  | 697  | -2811 | 3598  | -1633 |
| <b>22A</b>       | -629.721297  | -629.505764  | -629.204359  | -629.08942   | 2534 | -201 | 1585 | -1152 | 1655  | -2036 |
| <b>26</b>        | -1325.39439  | -1325.162103 | -1324.859179 | -1324.750233 | 3030 | -323 | 2041 | -1315 | 1684  | -1834 |
| $CH_3^{\bullet}$ | -40.468304   | -40.126484   | -39.911188   | -39.806139   | 3511 | -109 | 2181 | -1442 |       |       |

**Table S10:** Energetics of the HAA reactions of substrates with the 5'-deoxyadenosyl radical calculated with M06 functional: free energies of separated reactants, separated products, reactant complexes (RC) and product complexes (PC), free energies of formation of RC and PC, the free energy of reaction in going from separated reactants to separated products as well as the free energy of reaction in going from RC to PC.

| Substrates | $G_{A-H}$<br>(au) | $G_{A^{\bullet}}$<br>(au) | $G_{RC}$<br>(au) | $G_{TS}$<br>(au) | $G_{PC}$<br>(au) | $w_R$<br>(kcal mol <sup>-1</sup> ) | $w_P$<br>(kcal mol <sup>-1</sup> ) | $\Delta G_{0,inf}$<br>(kcal mol <sup>-1</sup> ) | $\Delta G_0$<br>(kcal mol <sup>-1</sup> ) |
|------------|-------------------|---------------------------|------------------|------------------|------------------|------------------------------------|------------------------------------|-------------------------------------------------|-------------------------------------------|
| <b>1A</b>  | -726.73722        | -726.082069               | -1614.012234     | -1613.982649     | -1614.018491     | 4.3                                | 2.3                                | -1.9                                            | -3.9                                      |
| <b>4</b>   | -456.333168       | -455.691873               | -1343.596956     | -1343.578016     | -1343.615475     | 11.3                               | 10.3                               | -10.6                                           | -11.6                                     |
| <b>5</b>   | -534.797119       | -534.145891               | -1422.072951     | -1422.047759     | -1422.081911     | 3.8                                | 2.5                                | -4.4                                            | -5.6                                      |
| <b>6C</b>  | -589.513097       | -588.862057               | -1476.788135     | -1476.762274     | -1476.797273     | 4.3                                | 3.0                                | -4.5                                            | -5.7                                      |
| <b>7A</b>  | -771.372853       | -770.763976               | -1658.654544     | -1658.642044     | -1658.701605     | 0.1                                | 1.5                                | -31.0                                           | -29.5                                     |
| <b>7B</b>  | -770.922147       | -770.300596               | -1658.202079     | -1658.191387     | -1658.236445     | 1.2                                | 2.6                                | -23.0                                           | -21.6                                     |
| <b>11A</b> | -669.953535       | -669.315966               | -1557.229194     | -1557.208024     | -1557.259112     | 3.9                                | -1.9                               | -13.0                                           | -18.8                                     |
| <b>12B</b> | -570.800932       | -570.16531                | -1458.081026     | -1458.055431     | -1458.101836     | 1.1                                | 2.2                                | -14.2                                           | -13.1                                     |
| <b>13D</b> | -1078.931267      | -1078.297692              | -1966.210588     | -1966.183413     | -1966.230213     | 1.6                                | 4.7                                | -15.5                                           | -12.3                                     |



|            |              |              |              |              |              |      |      |       |       |
|------------|--------------|--------------|--------------|--------------|--------------|------|------|-------|-------|
| <b>15</b>  | -2741.695807 | -2741.053796 | -3628.980247 | -3628.95338  | -3628.992515 | -1.6 | 0.8  | -10.2 | -7.7  |
| <b>16</b>  | -706.313878  | -705.668459  | -1593.589517 | -1593.566467 | -1593.59942  | 3.9  | 5.7  | -8.0  | -6.2  |
| <b>17C</b> | -1158.702009 | -1158.056696 | -2045.96568  | -2045.943201 | -2045.976266 | 11.4 | 12.9 | -8.1  | -6.6  |
| <b>21C</b> | -721.770847  | -721.131558  | -1609.049579 | -1609.025789 | -1609.070393 | 1.9  | 0.8  | -11.9 | -13.1 |
| <b>22A</b> | -629.721297  | -629.08942   | -1517.001168 | -1516.983373 | -1517.030634 | 1.2  | -0.7 | -16.5 | -18.5 |
| <b>26</b>  | -1325.39439  | -1324.750233 | -2212.671204 | -2212.645428 | -2212.681814 | 3.1  | 5.3  | -8.8  | -6.7  |
| 5'dAdo·    | -887.940052  | -887.281825  |              |              |              |      |      |       |       |

**Table S11.** Energetics of the HAA reactions of substrates with the 5'-deoxyadenosyl radical calculated with M06 functional: the total HAA barrier for the reaction between a substrate and 5'dAdo• in going from separated reactants to TS (non-tunneling regime); the RC-to-TS part of the HAA barrier (non-tunneling regime); the diagonal thermodynamic contribution to the barrier; the off-diagonal thermodynamic contribution to the barrier; the three-component thermodynamic contribution to the barrier; the intrinsic barrier in the non-tunneling regime (all contributions besides the diagonal one); the  $\Delta G_{00}^\ddagger$  - the intrinsic barrier without the off-diagonal thermodynamic contribution (non-tunneling regime);

| Reaction:<br>5'dAdo•<br>+ Substrates | $\Delta G_{\text{HAA, total}}^\ddagger$<br>(kcal mol <sup>-1</sup> ) | $\Delta G_{\text{HAA}}^\ddagger$<br>(kcal mol <sup>-1</sup> ) | $\Delta G_{\text{diag}}^\ddagger$<br>(kcal mol <sup>-1</sup> ) | $\Delta G_{\text{offdiag}}^\ddagger$<br>(kcal mol <sup>-1</sup> ) | $\Delta G_{\text{thermo}}^\ddagger$<br>(kcal mol <sup>-1</sup> ) | $\Delta G_{\text{intrinsic}}^\ddagger$<br>(kcal mol <sup>-1</sup> ) | $\Delta G_{00}^\ddagger$<br>(kcal mol <sup>-1</sup> ) |
|--------------------------------------|----------------------------------------------------------------------|---------------------------------------------------------------|----------------------------------------------------------------|-------------------------------------------------------------------|------------------------------------------------------------------|---------------------------------------------------------------------|-------------------------------------------------------|
| <b>1A</b>                            | 22.8                                                                 | 18.6                                                          | -2.0                                                           | -0.7                                                              | -2.7                                                             | 20.5                                                                | 21.2                                                  |
| <b>4</b>                             | 23.2                                                                 | 11.9                                                          | -5.8                                                           | -6.6                                                              | -12.4                                                            | 17.7                                                                | 24.3                                                  |
| <b>5</b>                             | 19.6                                                                 | 15.8                                                          | -2.8                                                           | -2.9                                                              | -5.7                                                             | 18.6                                                                | 21.6                                                  |
| <b>6C</b>                            | 20.5                                                                 | 16.2                                                          | -2.9                                                           | -1.7                                                              | -4.5                                                             | 19.1                                                                | 20.8                                                  |
| <b>7A</b>                            | 7.9                                                                  | 7.8                                                           | -14.8                                                          | 1.8                                                               | -13.0                                                            | 22.6                                                                | 20.8                                                  |
| <b>7B</b>                            | 7.9                                                                  | 6.7                                                           | -10.8                                                          | -6.6                                                              | -17.4                                                            | 17.5                                                                | 24.1                                                  |
| <b>11A</b>                           | 17.2                                                                 | 13.3                                                          | -9.4                                                           | -1.9                                                              | -11.3                                                            | 22.7                                                                | 24.6                                                  |
| <b>12B</b>                           | 17.1                                                                 | 16.1                                                          | -6.5                                                           | 2.5                                                               | -4.0                                                             | 22.6                                                                | 20.1                                                  |

|            |      |      |      |      |       |      |      |
|------------|------|------|------|------|-------|------|------|
| <b>13D</b> | 18.6 | 17.1 | -6.2 | ---  | ---   | 23.2 | ---  |
| <b>15</b>  | 15.2 | 16.9 | -3.8 | ---  | ---   | 20.7 | ---  |
| <b>16</b>  | 18.3 | 14.5 | -3.1 | 2.6  | -0.5  | 17.6 | 15.0 |
| <b>17C</b> | 25.5 | 14.1 | -3.3 | -4.4 | -7.7  | 17.4 | 21.8 |
| <b>21C</b> | 16.9 | 14.9 | -6.5 | ---  | ---   | 21.5 | ---  |
| <b>22A</b> | 12.4 | 11.2 | -9.2 | -7.3 | -16.6 | 20.4 | 27.7 |
| <b>26</b>  | 19.3 | 16.2 | -3.3 | -1.6 | -4.9  | 19.5 | 21.1 |

---

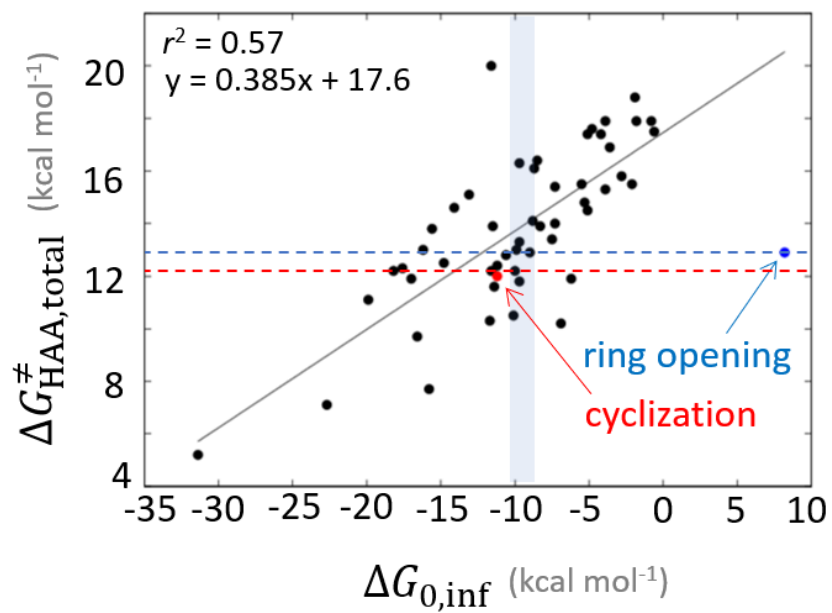

**Figure S3.** Correlation plot between the tunneling-corrected bimolecular free-energy barrier  $\Delta G_{\text{HAA,total}}^{\ddagger}$  and the free energy of HAA reaction  $\Delta G_{0,\text{inf}}$ , known as linear free-energy relationship. The grey zone exemplifies points that do not follow LFER.

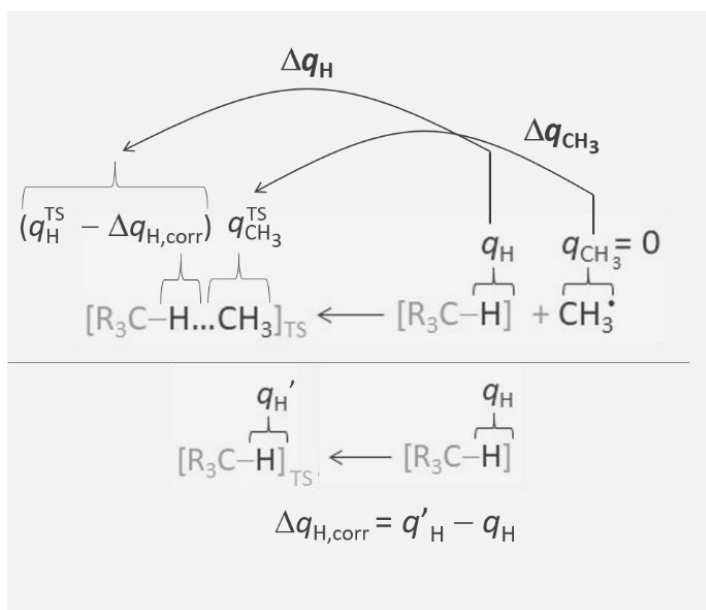

**Figure S4.** The description of the change of charge on the transferred hydrogen and the methyl radical in going from separated reactants to transition state in reactions between substrates/5'-deoxyadenosine and the methyl radical. The charge polarization on H-atom is also depicted. This polarization serves as a correction to the change of charge on H-atom along the reaction coordinate. The analogous approach was adopted for the evaluation of the change of charges in the reaction between substrates and 5'-deoxyadenosyl radical.

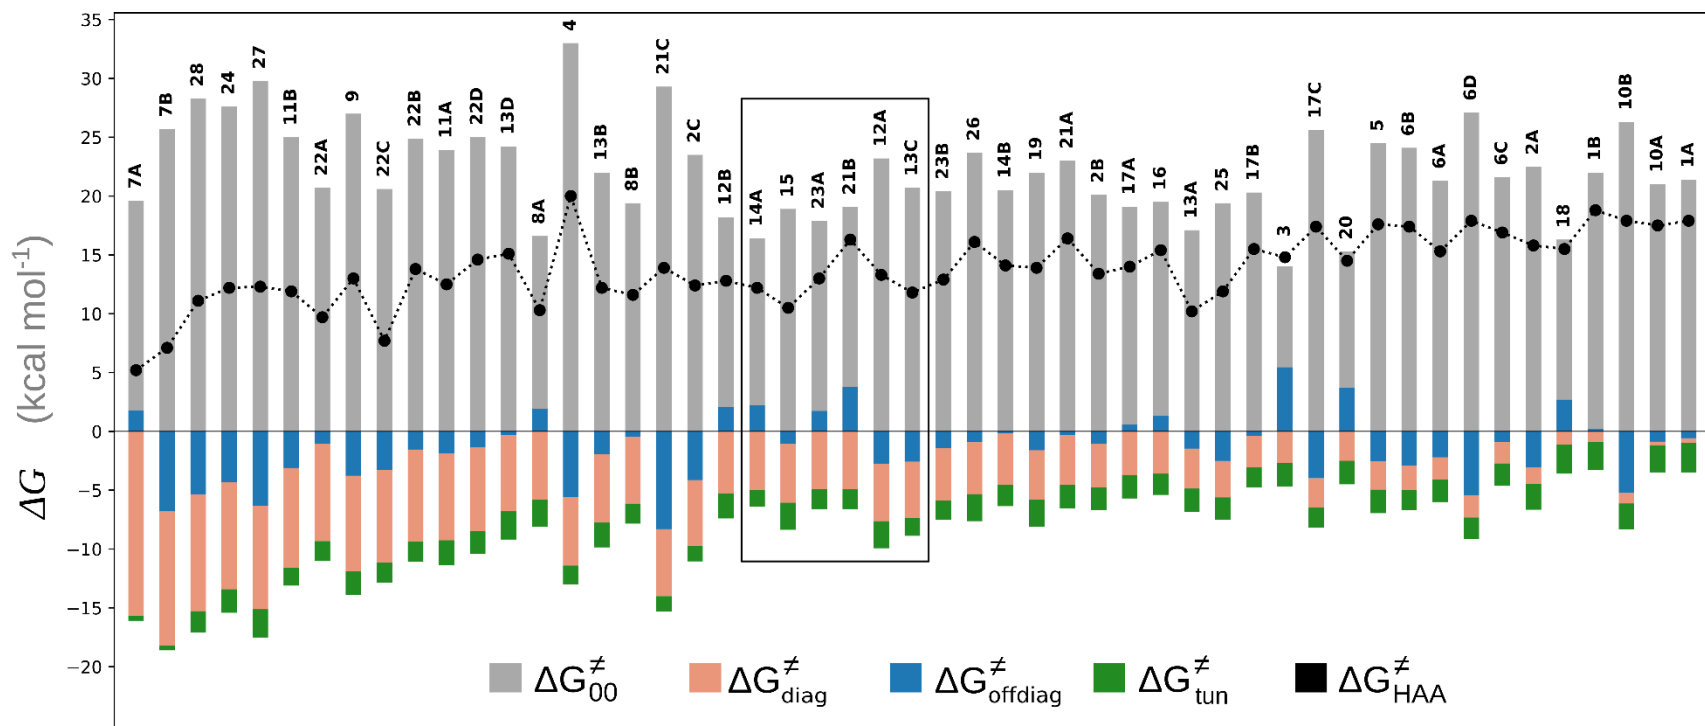

**Figure S5.** The free energy barrier  $\Delta G^\ddagger$  for bimolecular (total) HAA reactions between 5'dAdo<sup>•</sup> and C–H bond substrates from **Figure 2** of the main text (in black), calculated in aqueous solution. The total (bimolecular) barrier  $\Delta G^\ddagger_{\text{HAA,total}}$  was decomposed into four terms (following the eq 8 from the main text). Bimolecular HAA reactions are indicated by the labels used for the substrates in **Figure 2**. The reactions are ordered following the decrease in the magnitude of the diagonal contribution to the barrier. The reactions in a black frame correspond to the vertical grey zone in **Figure S4**.

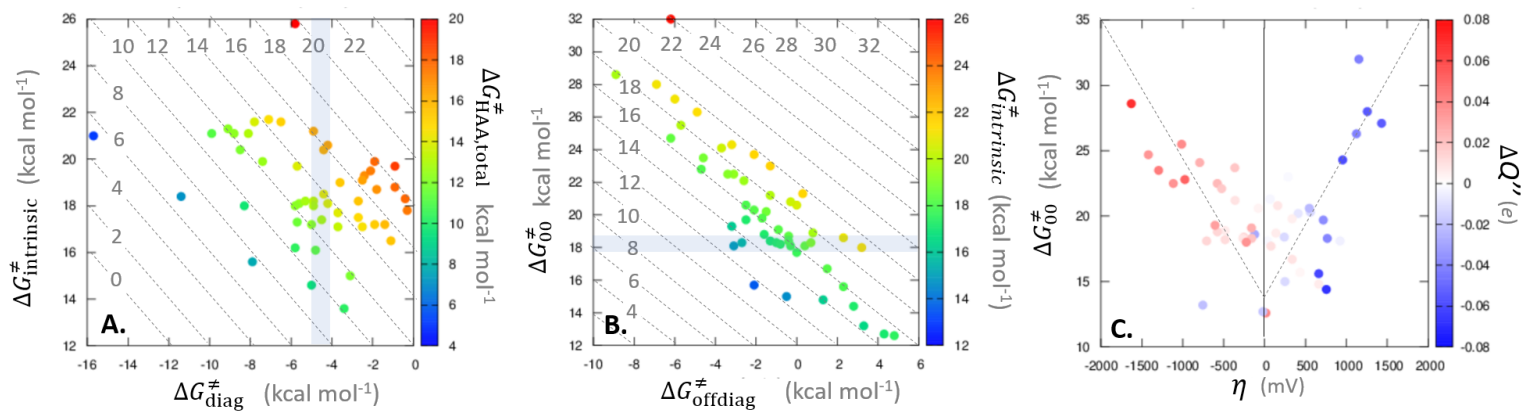

**Figure S6.** **A.**  $\Delta G_{\text{intrinsic}}^{\ddagger}$  vs.  $\Delta G_{\text{diag}}^{\ddagger}$  ( $\Delta G_{0,\text{int}}/2$ ) and their effects on the total (tunneling-corrected) barriers  $\Delta G_{\text{HAA,total}}^{\ddagger}$  for bimolecular R-to-P HAA reactions between the C–H substrates from **Figure 2** and the 5'dAdo<sup>•</sup> radical. The iso-contours for  $\Delta G_{\text{HAA,total}}^{\ddagger}$  are indicated. **B.** The tunneling corrected  $\Delta G_{00}^{\ddagger}$  vs.  $\Delta G_{\text{offdiag}}^{\ddagger}$  and their effects on  $\Delta G_{\text{intrinsic}}^{\ddagger}$ . The iso-contours for  $\Delta G_{\text{intrinsic}}^{\ddagger}$  are indicated. **C.** the tunneling corrected  $\Delta G_{00}^{\ddagger}$  vs. asynchronicity  $\eta$ ; the points are color coded according to the charge redistribution  $\Delta Q''$  defined by eq 12. The analogous plots for the reactions going from reactant complexes to product complexes are given in **Figure 9**.

## References:

1. Farrar, C. E., Siu, K. K., Howell, P. L., & Jarrett, J. T. (2010). Biotin synthase exhibits burst kinetics and multiple turnovers in the absence of inhibition by products and product-related biomolecules. *Biochemistry*, 49(46), 9985-9996.
2. Fenwick, M. K., Mehta, A. P., Zhang, Y., Abdelwahed, S. H., Begley, T. P., & Ealick, S. E. (2015). Non-canonical active site architecture of the radical SAM thiamin pyrimidine synthase. *Nature communications*, 6(1), 6480.
3. McLaughlin, M. I., Lanz, N. D., Goldman, P. J., Lee, K. H., Booker, S. J., & Drennan, C. L. (2016). Crystallographic snapshots of sulfur insertion by lipoyl synthase. *Proceedings of the National Academy of Sciences*, 113(34), 9446-9450.
4. Vey, J. L., Yang, J., Li, M., Broderick, W. E., Broderick, J. B., & Drennan, C. L. (2008). Structural basis for glycyl radical formation by pyruvate formate-lyase activating enzyme. *Proceedings of the National Academy of Sciences*, 105(42), 16137-16141.
5. Lepore, B. W., Ruzicka, F. J., Frey, P. A., & Ringe, D. (2005). The x-ray crystal structure of lysine-2, 3-aminomutase from *Clostridium subterminale*. *Proceedings of the National Academy of Sciences*, 102(39), 13819-13824.
6. Ruzicka, F. J., & Frey, P. A. (2007). Glutamate 2, 3-aminomutase: a new member of the radical SAM superfamily of enzymes. *Biochimica et Biophysica Acta (BBA)-Proteins and Proteomics*, 1774(2), 286-296.
7. Dowling, D. P., Bruender, N. A., Young, A. P., McCarty, R. M., Bandarian, V., & Drennan, C. L. (2014). Radical SAM enzyme QueE defines a new minimal core fold and metal-dependent mechanism. *Nature chemical biology*, 10(2), 106-112.
8. Cooper, L. E., Fedoseyenko, D., Abdelwahed, S. H., Kim, S. H., Dairi, T., & Begley, T. P. (2013). In vitro reconstitution of the radical S-adenosylmethionine enzyme MqnC involved in the biosynthesis of fufalosine-derived menaquinone. *Biochemistry*, 52(27), 4592-4594.
9. Grell, T. A., Kincannon, W. M., Bruender, N. A., Blaes, E. J., Krebs, C., Bandarian, V., & Drennan, C. L. (2018). Structural and spectroscopic analyses of the sporulation killing factor biosynthetic enzyme SkfB, a bacterial AdoMet radical sactisynthase. *Journal of Biological Chemistry*, 293(45), 17349-17361.

10. Nicolet, Y., Zeppieri, L., Amara, P., & Fontecilla-Camps, J. C. (2014). Crystal structure of tryptophan lyase (NosL): evidence for radical formation at the amino group of tryptophan. *Angewandte Chemie International Edition*, 53(44), 11840-11844.
11. Ding, W., Ji, X., Li, Y., & Zhang, Q. (2016). Catalytic promiscuity of the radical S-adenosyl-L-methionine enzyme NosL. *Frontiers in Chemistry*, 4, 27.
12. Benjdia, A., Leprince, J., Sandstrom, C., Vaudry, H., & Berteau, O. (2009). Mechanistic investigations of anaerobic sulfatase-maturating enzyme: direct C $\beta$  H-atom abstraction catalyzed by a radical AdoMet enzyme. *Journal of the American Chemical Society*, 131(24), 8348-8349.
13. Feng, J., Wu, J., Dai, N., Lin, S., Xu, H. H., Deng, Z., & He, X. (2013). Discovery and characterization of BlsE, a radical S-adenosyl-L-methionine decarboxylase involved in the blasticidin S biosynthetic pathway. *PloS one*, 8(7), e68545.
14. Landgraf, B. J., Arcinas, A. J., Lee, K. H., & Booker, S. J. (2013). Identification of an intermediate methyl carrier in the radical S-adenosylmethionine methylthiotransferases RimO and MiaB. *Journal of the American Chemical Society*, 135(41), 15404-15416.
15. Hover, B. M., Lokszejn, A., Ribeiro, A. A., & Yokoyama, K. (2013). Identification of a cyclic nucleotide as a cryptic intermediate in molybdenum cofactor biosynthesis. *Journal of the American Chemical Society*, 135(18), 7019-7032.
16. Kim, H. J., McCarty, R. M., Ogasawara, Y., Liu, Y. N., Mansoorabadi, S. O., LeVieux, J., & Liu, H. W. (2013). GenK-catalyzed C-6' methylation in the biosynthesis of gentamicin: isolation and characterization of a cobalamin-dependent radical SAM enzyme. *Journal of the American Chemical Society*, 135(22), 8093-8096.
17. Szu, P. H., Rusczycky, M. W., Choi, S. H., Yan, F., & Liu, H. W. (2009). Characterization and mechanistic studies of DesII: a radical S-adenosyl-L-methionine enzyme involved in the biosynthesis of TDP-D-desosamine. *Journal of the American Chemical Society*, 131(39), 14030-14042.
18. Bridwell-Rabb, J., Zhong, A., Sun, H. G., Drennan, C. L., & Liu, H. W. (2017). A B12-dependent radical SAM enzyme involved in oxetanocin A biosynthesis. *Nature*, 544(7650), 322-326.



19. Grove, T. L., Radle, M. I., Krebs, C., & Booker, S. J. (2011). Cfr and RlmN contain a single [4Fe-4S] cluster, which directs two distinct reactivities for S-adenosylmethionine: methyl transfer by SN2 displacement and radical generation. *Journal of the American Chemical Society*, 133(49), 19586-19589.
20. Sjekloća, L., & Ferré-D'Amaré, A. R. (2022). Biochemical and structural characterization of the flavodoxin-like domain of the *Schizosaccharomyces japonicus* putative tRNA Phe 4-demethylwyosine synthase Tyw1 in complex with FMN. *microPublication Biology*, 2022.
21. Sato, S., Kudo, F., Kuzuyama, T., Hammerschmidt, F., & Eguchi, T. (2018). C-methylation catalyzed by Fom3, a cobalamin-dependent radical S-adenosyl-L-methionine enzyme in fosfomycin biosynthesis, proceeds with inversion of configuration. *Biochemistry*, 57(33), 4963-4966.
22. Bruender, N. A., & Bandarian, V. (2016). The radical S-adenosyl-L-methionine enzyme MftC catalyzes an oxidative decarboxylation of the C-terminus of the MftA peptide. *Biochemistry*, 55(20), 2813-2816.
23. Barr, I., Stich, T.A., Gizzi, A.S., Grove, T.L., Bonanno, J.B., Latham, J.A., Chung, T., Wilmot, C.M., Britt, R.D., Almo, S.C. and Klinman, J.P., 2018. X-ray and EPR characterization of the auxiliary Fe-S clusters in the radical SAM enzyme PqqE. *Biochemistry*, 57(8), pp.1306-1315.
24. Parent, A., Benjdia, A., Guillot, A., Kubiak, X., Balty, C., Lefranc, B., Leprince, J. and Berteau, O., 2018. Mechanistic investigations of PoyD, a radical S-adenosyl-L-methionine enzyme catalyzing iterative and directional epimerizations in polytheonamide A biosynthesis. *Journal of the American Chemical Society*, 140(7), pp.2469-2477.
25. Liu, W.Q., Amara, P., Mouesca, J.M., Ji, X., Renoux, O., Martin, L., Zhang, C., Zhang, Q. and Nicolet, Y., 2018. 1, 2-Diol dehydration by the radical SAM enzyme AprD4: a matter of proton circulation and substrate flexibility. *Journal of the American Chemical Society*, 140(4), pp.1365-1371.
26. Ding, W., Li, Y., Zhao, J., Ji, X., Mo, T., Qianzhu, H., Tu, T., Deng, Z., Yu, Y., Chen, F. and Zhang, Q., 2017. The catalytic mechanism of the class c radical S-adenosylmethionine methyltransferase NosN. *Angewandte Chemie*, 129(14), pp.3915-3919.

27. Benjdia, A., Guillot, A., Lefranc, B., Vaudry, H., Leprince, J. and Berteau, O., 2016. Thioether bond formation by SPASM domain radical SAM enzymes: C  $\alpha$  H-atom abstraction in subtilisin A biosynthesis. *Chemical Communications*, 52(37), pp.6249-6252.
