# Supplementary material for: Elucidation of factors shaping reactivity of 5′-deoxyadenosyl – a prominent organic radical in biology
Source: Royal Society of Chemistry journal article supplement (doi:10.1039/d4cp01725k), 2024-01-01
Supplement: d4cp01725k2.pdf [file d4cp01725k2.pdf]

Cartesian Coordinates of all the substrates from **Figure 2** in main text.

**1A**

|   |              |              |              |
|---|--------------|--------------|--------------|
| H | 7.164106533  | 0.138728010  | 0.158455011  |
| H | 4.144087300  | -1.548703112 | 0.383910027  |
| H | 3.994319285  | -0.228837016 | 1.511527109  |
| H | 2.678459195  | 1.083651076  | -0.191270014 |
| H | 2.830539201  | -0.239685017 | -1.326540094 |
| H | 1.588977115  | -1.741245128 | 0.252728018  |
| H | 1.441664102  | -0.418443030 | 1.393978098  |
| H | 0.144359011  | 0.893628066  | -0.292012021 |
| H | 0.284415021  | -0.424189030 | -1.435681102 |
| H | -0.952814070 | -1.935714142 | 0.097158007  |
| H | -1.091851079 | -0.662668047 | 1.291695095  |
| H | -1.353095097 | 1.770957128  | 1.291546094  |
| H | -2.816623205 | 1.009897071  | 1.937431142  |
| H | -2.886849206 | 2.639014190  | 1.251204092  |
| H | -3.598152257 | -2.091861150 | -0.128498009 |
| H | -2.205607160 | -0.541341039 | -1.543785114 |
| H | -2.314617165 | 1.722315124  | -1.002338070 |
| H | -4.811390347 | 1.718243126  | -0.227941017 |
| O | 5.354649384  | 0.941076066  | -1.021625072 |
| O | 6.382623445  | -0.285587021 | 0.548952042  |
| C | 5.288041383  | 0.152161011  | -0.108324008 |
| C | 4.029169290  | -0.462156033 | 0.443037032  |
| C | 2.758494200  | -0.004458000 | -0.261320019 |
| C | 1.505468109  | -0.651228044 | 0.325312023  |
| C | 0.222417016  | -0.195515014 | -0.366349026 |
| C | -1.029559075 | -0.850394062 | 0.217086015  |
| C | -2.427490175 | 1.654449121  | 1.147732080  |
| O | -5.786324402 | -0.681985049 | -0.010846001 |
| C | -4.621303333 | -0.317565023 | -0.132179009 |
| N | -3.501309253 | -1.099198081 | 0.016098001  |
| C | -2.310902166 | -0.391197028 | -0.461302033 |
| C | -2.745795195 | 1.083206080  | -0.232166016 |
| N | -4.192798304 | 0.951255066  | -0.442179032 |

**1B**

|   |             |              |              |
|---|-------------|--------------|--------------|
| H | 4.201386300 | -1.563953112 | 0.356693026  |
| H | 4.055240292 | -0.273260020 | 1.518005112  |
| H | 2.742230197 | 1.077627075  | -0.148618011 |
| H | 2.886992206 | -0.218423016 | -1.309739092 |
| H | 1.647734121 | -1.752250125 | 0.247097018  |
| H | 1.500147110 | -0.447500032 | 1.407724102  |
| H | 0.206393015 | 0.890709066  | -0.264907019 |

|   |              |              |              |
|---|--------------|--------------|--------------|
| H | 0.342855024  | -0.415500030 | -1.421542100 |
| H | -0.897251062 | -1.938963142 | 0.102379007  |
| H | -1.041137076 | -0.669835049 | 1.300476093  |
| H | -1.301256095 | 1.765955128  | 1.303556095  |
| H | -2.769989200 | 1.006654071  | 1.939430141  |
| H | -2.833328203 | 2.636909192  | 1.255003093  |
| H | -3.544079253 | -2.090721149 | -0.132327010 |
| H | -2.141862156 | -0.541247041 | -1.539665109 |
| H | -2.247998163 | 1.721832123  | -0.996082073 |
| H | -4.749763344 | 1.721460122  | -0.236859017 |
| O | 5.368825407  | 0.960400069  | -1.024344075 |
| O | 6.470900477  | -0.245844017 | 0.512615037  |
| C | 5.424973389  | 0.139205010  | -0.075057006 |
| C | 4.105095298  | -0.475957034 | 0.442760032  |
| C | 2.823978202  | -0.009711001 | -0.237781017 |
| C | 1.566393111  | -0.662465049 | 0.334760024  |
| C | 0.281883020  | -0.198134014 | -0.349484025 |
| C | -0.973714068 | -0.853821062 | 0.225408016  |
| C | -2.374935169 | 1.651690117  | 1.153069082  |
| O | -5.730614420 | -0.676791047 | -0.027852002 |
| C | -4.564002327 | -0.314667022 | -0.141926010 |
| N | -3.446484247 | -1.098213081 | 0.012857001  |
| C | -2.251662165 | -0.392079028 | -0.457461033 |
| C | -2.685311194 | 1.082629076  | -0.229477017 |
| N | -4.131429296 | 0.953675068  | -0.448978032 |

## 2A

|   |              |              |              |
|---|--------------|--------------|--------------|
| O | 4.291938307  | -0.721047050 | -0.422502030 |
| P | 2.769793198  | -0.507006037 | -0.056743004 |
| O | 2.633060190  | 1.076191079  | 0.053242004  |
| O | 2.111564150  | -0.920251068 | -1.432549103 |
| O | 2.278915163  | -1.214109090 | 1.141487080  |
| C | 1.501452108  | 1.699766125  | 0.694994051  |
| C | 0.357604026  | 1.867900135  | -0.285993021 |
| C | -0.880868062 | 2.529550183  | 0.321089023  |
| O | -0.068242005 | 0.554815040  | -0.747832055 |
| C | -1.476641104 | 0.401129029  | -0.563923043 |
| C | -1.808931131 | 1.333920095  | 0.602182045  |
| N | -1.809480131 | -0.980821072 | -0.384163028 |
| O | -1.455533107 | 3.390477243  | -0.650099045 |
| O | -3.181588228 | 1.672343122  | 0.558366042  |
| C | -1.464636104 | -1.839350134 | 0.653388045  |
| C | -2.126693152 | -3.008681219 | 0.386077028  |
| N | -2.863996205 | -2.895178207 | -0.778213058 |
| C | -2.644554189 | -1.686117119 | -1.217745088 |
| N | -0.662643049 | -1.432368103 | 1.718339124  |

|   |              |              |              |
|---|--------------|--------------|--------------|
| H | 4.861905348  | -0.827393061 | 0.351370025  |
| H | 1.200382084  | -0.557743041 | -1.477613107 |
| H | 1.198193084  | 1.110481082  | 1.561468111  |
| H | 1.845197135  | 2.677807190  | 1.026803072  |
| H | 0.695646050  | 2.437083174  | -1.152694085 |
| H | -0.642901049 | 3.081329222  | 1.235201090  |
| H | -2.010875144 | 0.741418051  | -1.454431106 |
| H | -1.536591113 | 0.853121061  | 1.541076112  |
| H | -2.401001170 | 3.451744247  | -0.447604032 |
| H | -3.493666251 | 1.851484131  | 1.452600105  |
| H | -2.107085151 | -3.914959282 | 0.969475067  |
| H | -3.041902220 | -1.246225090 | -2.118747154 |
| H | 0.312873023  | -1.281247093 | 1.462149103  |
| H | -0.695529049 | -2.109302150 | 2.469041178  |

## 2B

|   |              |              |              |
|---|--------------|--------------|--------------|
| O | 4.181013299  | -0.024843002 | 1.035986075  |
| P | 3.193180232  | -0.578705043 | -0.146103011 |
| O | 2.416484172  | 0.774083057  | -0.615886042 |
| O | 4.041513291  | -0.977394073 | -1.300068092 |
| O | 2.215080157  | -1.524640110 | 0.484348035  |
| C | 1.488767105  | 1.411442101  | 0.258241019  |
| C | 0.228157016  | 1.751364124  | -0.511652037 |
| C | -0.824287060 | 2.465549179  | 0.339181025  |
| O | -0.389463028 | 0.533492039  | -0.996534070 |
| C | -1.733975126 | 0.467306033  | -0.556035042 |
| C | -1.781725129 | 1.323249093  | 0.711359053  |
| N | -2.140227152 | -0.903257065 | -0.391184028 |
| O | -1.491483108 | 3.432059245  | -0.463823033 |
| O | -3.110909225 | 1.753608126  | 0.949347070  |
| C | -1.626287117 | -1.862888134 | 0.468318034  |
| C | -2.432746175 | -2.961352214 | 0.303388022  |
| N | -3.421162247 | -2.702274193 | -0.628567045 |
| C | -3.212151231 | -1.476592107 | -1.029822076 |
| N | -0.562452041 | -1.600724115 | 1.324990097  |
| H | 3.793029272  | -0.186552013 | 1.904047138  |
| H | 1.242489088  | 0.765518053  | 1.104130082  |
| H | 1.934302138  | 2.334649170  | 0.640530044  |
| H | 0.484849035  | 2.369706173  | -1.374591097 |
| H | -0.387069028 | 2.938697210  | 1.223509088  |
| H | -2.412629174 | 0.901607064  | -1.297795096 |
| H | -1.383587100 | 0.752658057  | 1.550286109  |
| H | -2.380613172 | 3.537045254  | -0.094090007 |
| H | -3.229356233 | 1.908148140  | 1.893339136  |
| H | -2.347606170 | -3.912394281 | 0.804100060  |

|   |              |              |              |
|---|--------------|--------------|--------------|
| H | -3.778445274 | -0.937321067 | -1.772526128 |
| H | 0.331349024  | -1.419304103 | 0.858129062  |
| H | -0.429928031 | -2.367477172 | 1.970985144  |

## 2C

|   |              |              |              |
|---|--------------|--------------|--------------|
| O | 4.034347290  | 0.006212000  | 1.170831085  |
| P | 3.255605234  | -0.512115037 | -0.030805002 |
| O | 2.390202171  | 0.815538056  | -0.618300043 |
| O | 4.093582295  | -0.894464065 | -1.237783088 |
| O | 2.183972155  | -1.543238114 | 0.342037024  |
| C | 1.456239104  | 1.426529103  | 0.240636017  |
| C | 0.199631014  | 1.792445127  | -0.531153038 |
| C | -0.863335060 | 2.468479175  | 0.332279024  |
| O | -0.423102031 | 0.597538044  | -1.072822077 |
| C | -1.731254123 | 0.449775033  | -0.558328041 |
| C | -1.770054130 | 1.291954095  | 0.718763053  |
| N | -2.059084150 | -0.943932068 | -0.386771028 |
| O | -1.583619116 | 3.410701244  | -0.457465033 |
| O | -3.108889223 | 1.672785123  | 0.997073074  |
| C | -1.491473106 | -1.879362136 | 0.468915034  |
| C | -2.244210164 | -3.016583216 | 0.300825021  |
| N | -3.248065231 | -2.806305201 | -0.626491045 |
| C | -3.102199221 | -1.569543113 | -1.023116072 |
| N | -0.438509031 | -1.572377111 | 1.322310094  |
| H | 1.189170088  | 0.766092057  | 1.070755079  |
| H | 1.872757136  | 2.349684169  | 0.667374047  |
| H | 0.462543033  | 2.438311177  | -1.372072097 |
| H | -0.429626031 | 2.958339211  | 1.209221085  |
| H | -2.472518179 | 0.848407060  | -1.259434090 |
| H | -1.330610096 | 0.728638050  | 1.541311109  |
| H | -2.470645177 | 3.475058252  | -0.073904006 |
| H | -3.201193229 | 1.829584131  | 1.943550140  |
| H | -2.110303152 | -3.963296285 | 0.799555057  |
| H | -3.698133265 | -1.057682078 | -1.762212125 |
| H | 0.476746034  | -1.419618101 | 0.856017063  |
| H | -0.314675023 | -2.316238167 | 1.997091146  |

## 3

|   |              |              |              |
|---|--------------|--------------|--------------|
| H | 4.078032295  | 1.229412086  | -0.789810057 |
| H | -5.685570429 | -0.118520008 | -0.071679005 |
| H | -4.822523347 | -1.215583087 | 1.032662075  |
| H | -4.752072340 | -1.508656111 | -0.697005052 |
| H | -2.219694160 | -1.192557087 | -0.953678068 |
| H | -2.226090161 | -1.304825094 | 0.780477058  |
| H | -1.034888075 | 0.917649067  | 0.928222065  |

|   |              |              |              |
|---|--------------|--------------|--------------|
| H | -1.031657072 | 1.025479076  | -0.816692060 |
| H | 0.336683024  | -1.074003079 | -0.946710068 |
| H | 0.332448024  | -1.184290084 | 0.802375058  |
| H | 1.521032111  | 1.015397074  | 0.944910067  |
| H | 1.524179107  | 1.127394079  | -0.804378058 |
| H | 2.889023209  | -0.969077068 | -0.936892068 |
| H | 2.885054205  | -1.082977078 | 0.812167060  |
| O | -3.630337261 | 1.358708096  | -0.041024003 |
| C | 5.407475402  | -0.279322020 | -0.009475001 |
| C | 4.104203296  | 0.515979037  | 0.040877003  |
| C | -4.788861345 | -0.720905051 | 0.058111004  |
| C | -3.554869256 | 0.145217011  | -0.013817001 |
| C | -2.228006158 | -0.581363042 | -0.042799003 |
| C | -0.999595074 | 0.316462023  | 0.014985001  |
| C | 0.307823022  | -0.472595034 | -0.030806002 |
| C | 1.549800113  | 0.415009030  | 0.028283002  |
| C | 2.859916206  | -0.369209027 | -0.019646001 |
| H | 4.075114295  | 1.113961078  | 0.958093068  |
| H | 6.279549454  | 0.376487027  | 0.035884003  |
| H | 5.471651373  | -0.978888072 | 0.828166062  |
| H | 5.475107377  | -0.861700061 | -0.932198065 |

#### 4

|   |              |              |              |
|---|--------------|--------------|--------------|
| C | 3.077506699  | 0.810721057  | -0.297544120 |
| C | 1.889614855  | 0.022465309  | 0.201208853  |
| O | 1.684062991  | -0.150521408 | 1.398713960  |
| N | 1.054193805  | -0.474716120 | -0.747392283 |
| C | -0.088525377 | -1.297115987 | -0.414119170 |
| C | -1.383150201 | -0.559636670 | -0.067391765 |
| O | -2.353229281 | -1.201604706 | 0.332396228  |
| N | -1.392979213 | 0.769386148  | -0.232194622 |
| C | -2.562195254 | 1.580274033  | 0.059275855  |
| H | 3.138908654  | 0.867954211  | -1.383173251 |
| H | 0.150193926  | -1.922798163 | 0.445314668  |
| H | -0.309939315 | -1.954598345 | -1.254361915 |
| H | 1.282368901  | -0.339804404 | -1.718274289 |
| H | -3.390496336 | 1.325684652  | -0.604314783 |
| H | -0.557783841 | 1.214750389  | -0.574506106 |
| H | -2.304291678 | 2.627153550  | -0.079614670 |
| H | -2.888291653 | 1.426042123  | 1.088576573  |
| H | 3.986406863  | 0.349376846  | 0.089518831  |
| H | 3.018248315  | 1.820311347  | 0.110483826  |

#### 5

|   |             |             |              |
|---|-------------|-------------|--------------|
| C | 2.915059233 | 2.099921821 | -0.154532395 |
|---|-------------|-------------|--------------|

|   |              |              |              |
|---|--------------|--------------|--------------|
| N | 1.935948223  | 1.339692567  | -0.387340579 |
| C | 1.689403855  | 0.232618446  | 0.523332606  |
| C | 2.004628620  | -1.159391109 | -0.122024574 |
| O | 2.432179394  | -1.191415980 | -1.296969823 |
| C | 0.237555620  | 0.286644898  | 1.022398047  |
| C | -0.806480061 | 0.090959393  | -0.075611122 |
| C | -2.234873720 | 0.158997452  | 0.465908232  |
| C | -3.247309111 | 0.002734860  | -0.653591752 |
| N | -4.659658206 | 0.065541841  | -0.126071641 |
| O | 1.804838204  | -2.137134428 | 0.639410056  |
| H | 3.593753016  | 1.965832344  | 0.698020098  |
| H | 2.349156675  | 0.301307216  | 1.401732302  |
| H | 0.070769376  | 1.249471354  | 1.516256165  |
| H | -0.670744112 | 0.852911009  | -0.846477516 |
| H | -0.649684805 | -0.878195045 | -0.558402888 |
| H | -2.393345023 | 1.117767551  | 0.969255723  |
| H | -2.386752406 | -0.626451315 | 1.212442986  |
| H | -3.160100753 | 0.798923108  | -1.390243922 |
| H | -3.151176179 | -0.955980799 | -1.159705245 |
| H | -5.345652577 | -0.002015509 | -0.879835447 |
| H | -4.846306399 | -0.695543189 | 0.529014667  |
| H | -4.831510105 | 0.943078246  | 0.367731635  |
| H | 0.122852951  | -0.491361673 | 1.779259448  |
| H | 3.120662856  | 2.937104556  | -0.819958560 |

## 6A

|   |              |              |              |
|---|--------------|--------------|--------------|
| C | -2.240055916 | 2.302617303  | 0.266977763  |
| N | -1.537035601 | 1.297382168  | 0.563079058  |
| C | -1.215202645 | 0.364161729  | -0.503495945 |
| C | -1.657279928 | -1.058927766 | -0.195087519 |
| O | -2.062764016 | -1.262935761 | 1.065894427  |
| C | 0.304491836  | 0.372988425  | -0.790324830 |
| C | 1.173496831  | -0.093423496 | 0.370759009  |
| O | -1.630828490 | -1.937548344 | -1.025720396 |
| H | -2.636528941 | 2.489257489  | -0.738092003 |
| H | -1.732323268 | 0.622820915  | -1.438098987 |
| H | 0.576586345  | 1.390309545  | -1.071900806 |
| H | 0.949931382  | 0.491940676  | 1.266232948  |
| H | 0.950732784  | -1.132442213 | 0.629734637  |
| H | 0.479295256  | -0.254622629 | -1.665525123 |
| H | -2.475108025 | 3.035318070  | 1.035988441  |
| C | 2.697227461  | 0.007510497  | 0.128802054  |
| O | 3.094576735  | 0.631982106  | -0.886021804 |
| O | 3.421028328  | -0.543197520 | 0.998494777  |
| H | -2.305502685 | -2.200221045 | 1.153148283  |

**6B**

|   |              |              |              |
|---|--------------|--------------|--------------|
| C | -2.566327795 | 2.095281673  | 0.157309417  |
| N | -1.616153272 | 1.313279330  | 0.433160617  |
| C | -1.280483543 | 0.266939527  | -0.519217138 |
| C | -1.681410162 | -1.162567940 | -0.013104064 |
| O | -2.300054138 | -1.261825108 | 1.068734225  |
| C | 0.217632169  | 0.334802073  | -0.847033940 |
| C | 1.104515651  | 0.023064841  | 0.351851373  |
| O | -1.345533837 | -2.093944971 | -0.784473320 |
| H | -3.157179314 | 2.024588090  | -0.765135098 |
| H | -1.835390031 | 0.406268844  | -1.459390375 |
| H | 0.456770261  | 1.329545572  | -1.230126984 |
| H | 0.893867487  | 0.700206696  | 1.182950525  |
| H | 0.910465184  | -0.983891332 | 0.731563612  |
| H | 0.419283309  | -0.378284631 | -1.645333148 |
| H | -2.834949174 | 2.887407763  | 0.854517194  |
| C | 2.574876156  | 0.112944902  | 0.053189660  |
| O | 3.072629146  | 0.425320518  | -1.003711766 |
| O | 3.321583149  | -0.203576620 | 1.133490291  |
| H | 4.258395714  | -0.129377358 | 0.888542694  |

**6C**

|   |              |              |              |
|---|--------------|--------------|--------------|
| C | -2.268654141 | 2.267814316  | 0.158952902  |
| N | -1.524383486 | 1.303941225  | 0.489102329  |
| C | -1.210894428 | 0.305147134  | -0.524109045 |
| C | -1.701546462 | -1.079244199 | -0.102471484 |
| O | -2.858400870 | -1.030136121 | 0.572290415  |
| C | 0.289978207  | 0.300191116  | -0.835782716 |
| C | 1.167052003  | 0.018467043  | 0.378179877  |
| O | -1.147978751 | -2.113059324 | -0.389859660 |
| H | -2.707846127 | 2.378470920  | -0.838778770 |
| H | -1.749923275 | 0.506696015  | -1.463761565 |
| H | 0.544963479  | 1.272831455  | -1.257934264 |
| H | 0.986814899  | 0.744786460  | 1.173196878  |
| H | 0.945072995  | -0.961138234 | 0.808154568  |
| H | 0.477504642  | -0.444311529 | -1.608856870 |
| H | -2.497194936 | 3.038794150  | 0.891217489  |
| C | 2.636470166  | 0.047019495  | 0.056939779  |
| O | 3.123030702  | 0.276677871  | -1.025347205 |
| O | 3.385135596  | -0.219824627 | 1.146279457  |
| H | 4.321415866  | -0.189186963 | 0.889775116  |
| H | -3.138848545 | -1.940162665 | 0.766111187  |

**6D**

|   |              |              |              |
|---|--------------|--------------|--------------|
| C | -2.523088706 | 2.111018076  | -0.178070057 |
| N | -1.609324182 | 1.360076316  | 0.259769268  |
| C | -1.228979484 | 0.200868038  | -0.533969161 |
| C | -1.638728143 | -1.150035488 | 0.140454676  |
| O | -2.214488918 | -1.119817351 | 1.251904474  |
| C | 0.280124145  | 0.239040735  | -0.826214827 |
| C | 1.168843046  | 0.095266551  | 0.404504291  |
| O | -1.357066398 | -2.171263905 | -0.534517626 |
| H | -3.050628178 | 1.930426814  | -1.124362867 |
| H | -1.758607745 | 0.211849505  | -1.499836387 |
| H | 0.510883529  | 1.179627017  | -1.336893214 |
| H | 0.948725847  | 0.876693240  | 1.132577629  |
| H | 0.947721496  | -0.855519435 | 0.904307461  |
| H | 0.501494683  | -0.563618591 | -1.527077115 |
| H | -2.823996866 | 2.988990941  | 0.392084389  |
| C | 2.688290890  | 0.099922682  | 0.129450542  |
| O | 3.086067660  | -0.262885394 | -1.007154281 |
| O | 3.424350911  | 0.445783244  | 1.092752739  |

## 7A

|   |              |              |              |
|---|--------------|--------------|--------------|
| C | 0.821801060  | -0.917176067 | -0.043828003 |
| C | 0.408103030  | 0.403842029  | -0.135357010 |
| C | 1.371529098  | 1.434111102  | -0.099521007 |
| N | -0.101921007 | -1.911278139 | -0.031738002 |
| C | -1.513275108 | -1.643800116 | -0.230687016 |
| C | -1.845178132 | -0.259915019 | 0.334614024  |
| N | -0.964795071 | 0.727823054  | -0.280418020 |
| C | -3.305940236 | 0.081065006  | 0.105977008  |
| O | -3.538502254 | 1.395231100  | 0.243612018  |
| O | -4.171379299 | -0.726466053 | -0.127270009 |
| O | 1.146966080  | 2.654633190  | -0.142674010 |
| N | 4.343415315  | -0.659954045 | 0.215792016  |
| H | -1.717024124 | -0.299864022 | 1.429012104  |
| H | 3.408390248  | 1.686764123  | 0.039136003  |
| H | 0.230448017  | -2.860707204 | -0.019069001 |
| H | -2.098895149 | -2.401641173 | 0.285912021  |
| H | -1.783028127 | -1.671419121 | -1.290477093 |
| H | -1.145270083 | 1.670213120  | 0.042934003  |
| H | 4.574420330  | -1.629330119 | 0.068886005  |
| H | 5.042352361  | -0.000649000 | -0.086162006 |
| N | 2.127302151  | -1.294540095 | 0.047285003  |
| C | 3.026463220  | -0.344676025 | 0.067574005  |
| N | 2.695699192  | 0.971780068  | -0.003368000 |
| H | -4.486992321 | 1.561920113  | 0.114982008  |



**7B**

|   |              |              |              |
|---|--------------|--------------|--------------|
| C | 0.769091053  | -0.907498066 | -0.105890007 |
| C | 0.378493027  | 0.426457031  | -0.159611011 |
| C | 1.360182098  | 1.433959101  | -0.067399005 |
| N | -0.167873012 | -1.883552135 | -0.188978014 |
| C | -1.594334114 | -1.592602117 | -0.289769021 |
| C | -1.884758135 | -0.212137015 | 0.295818021  |
| N | -0.983049072 | 0.746097052  | -0.334438024 |
| C | -3.368220244 | 0.214733016  | 0.153746011  |
| O | -3.584985258 | 1.442821106  | 0.020926002  |
| O | -4.219514304 | -0.702776052 | 0.235016017  |
| O | 1.169108084  | 2.663455194  | -0.086294006 |
| N | 4.290203309  | -0.723565050 | 0.281337020  |
| H | -1.693100121 | -0.273455019 | 1.381620100  |
| H | 3.397988242  | 1.641806118  | 0.137322010  |
| H | 0.147245010  | -2.835936206 | -0.113119008 |
| H | -2.152981154 | -2.348437169 | 0.257771019  |
| H | -1.922647136 | -1.621075118 | -1.333188095 |
| H | -1.203680086 | 1.697630122  | -0.073309005 |
| H | 4.503245323  | -1.690730121 | 0.094795007  |
| H | 5.002451359  | -0.073766005 | -0.012067001 |
| N | 2.066812148  | -1.312150092 | 0.015881001  |
| C | 2.979670214  | -0.380654027 | 0.094036007  |
| N | 2.674460192  | 0.942085070  | 0.051542004  |

**8A**

|   |              |              |              |
|---|--------------|--------------|--------------|
| O | -2.810001202 | -1.368372100 | 1.810407128  |
| O | -4.598584330 | 1.650776117  | -0.763775055 |
| C | -1.342806097 | 1.108367082  | -0.845632060 |
| C | -0.750514053 | 1.256649088  | 0.571576041  |
| C | 0.736728054  | 1.517262110  | 0.530331041  |
| C | 3.931612284  | -0.394724029 | -0.108704008 |
| C | 2.099847149  | -1.957246142 | -0.247128018 |
| O | 1.180190082  | 2.636770188  | 0.723555054  |
| H | -5.660932413 | -0.211772015 | -1.151180083 |
| O | 5.738938431  | 1.127671082  | 0.025380002  |
| O | -5.298836371 | -1.003068070 | -0.725824050 |
| H | -2.975085216 | 0.244899018  | -1.926195137 |
| C | 1.661676121  | 0.375466027  | 0.228438016  |
| O | 6.218123459  | -1.017978073 | -0.416376030 |
| C | 3.032067217  | 0.632031044  | 0.158421011  |
| C | 3.459196248  | -1.695248120 | -0.311775022 |
| H | -3.552114254 | -2.536550182 | 0.267868020  |
| H | -3.420078244 | 1.239895088  | 0.897205066  |
| H | -5.063996367 | -0.485904035 | 1.275652092  |

|   |              |              |              |
|---|--------------|--------------|--------------|
| H | -5.116122368 | 2.190983156  | -0.154926011 |
| H | -2.077329149 | -1.985591145 | 1.926533139  |
| C | 5.397147397  | -0.157073012 | -0.186734013 |
| C | 1.202096089  | -0.929647066 | 0.021793002  |
| H | -1.548198113 | 2.094054151  | -1.267916092 |
| H | -1.210066086 | 2.094214153  | 1.093417079  |
| H | -0.622665046 | 0.630407047  | -1.512476109 |
| H | -0.954246071 | 0.350449025  | 1.144019082  |
| H | 3.382222242  | 1.640884117  | 0.317411023  |
| H | 4.166623298  | -2.486220181 | -0.519219038 |
| H | 1.734635127  | -2.962954213 | -0.406404029 |
| H | 0.145087010  | -1.154248083 | 0.059426004  |
| O | -2.347444167 | -1.068728076 | -0.464621034 |
| C | -3.780446273 | 0.762059054  | -0.014786001 |
| C | -4.489322320 | -0.554442039 | 0.348927025  |
| C | -3.303434237 | -1.498131108 | 0.495262036  |
| C | -2.619111189 | 0.281925020  | -0.891888062 |
| H | 6.704755492  | 1.197401085  | -0.041800003 |

## 8B

|   |              |              |              |
|---|--------------|--------------|--------------|
| O | -2.809391204 | -1.415174103 | 1.783939127  |
| O | -4.556803326 | 1.679471119  | -0.731203052 |
| C | -1.309482097 | 1.081430076  | -0.835244062 |
| C | -0.711358053 | 1.203895085  | 0.580509040  |
| C | 0.773732054  | 1.491625107  | 0.534773039  |
| C | 4.016280289  | -0.349990025 | -0.107901008 |
| C | 2.195549156  | -1.942964140 | -0.258549019 |
| O | 1.184809085  | 2.626137191  | 0.728463051  |
| H | -5.651639425 | -0.153558011 | -1.141899081 |
| O | 5.843077444  | 1.170913087  | 0.000267000  |
| O | -5.306292373 | -0.959239070 | -0.729735051 |
| H | -2.962327212 | 0.266679019  | -1.922959139 |
| C | 1.717143125  | 0.373549027  | 0.229792017  |
| O | 6.288205471  | -0.995620069 | -0.387048028 |
| C | 3.087082220  | 0.648070047  | 0.160370012  |
| C | 3.553866254  | -1.651704119 | -0.316830023 |
| H | -3.581080258 | -2.541352185 | 0.224688016  |
| H | -3.378027242 | 1.222503090  | 0.917670065  |
| H | -5.048088362 | -0.480916035 | 1.278351091  |
| H | -5.061782363 | 2.219186160  | -0.111514008 |
| H | -2.072407150 | -2.031389145 | 1.876216135  |
| C | 5.515870376  | -0.029228002 | -0.170796012 |
| C | 1.275654092  | -0.938461068 | 0.015308001  |
| H | -1.497810110 | 2.075033150  | -1.247623092 |
| H | -1.180840087 | 2.022769144  | 1.123432081  |
| H | -0.598173046 | 0.596240041  | -1.506316110 |

|   |              |              |              |
|---|--------------|--------------|--------------|
| H | -0.900555065 | 0.282165020  | 1.131682081  |
| H | 3.435815245  | 1.657666121  | 0.321587023  |
| H | 4.276913309  | -2.428514175 | -0.525867038 |
| H | 1.850362132  | -2.955648212 | -0.425801031 |
| H | 0.222823016  | -1.182282084 | 0.050832004  |
| O | -2.353243167 | -1.083721080 | -0.487843035 |
| C | -3.750314269 | 0.765125054  | 0.000178000  |
| C | -4.480869322 | -0.544223039 | 0.346611025  |
| C | -3.311506238 | -1.511727111 | 0.468668034  |
| C | -2.600995186 | 0.279481020  | -0.889757065 |

## 9

|   |              |              |              |
|---|--------------|--------------|--------------|
| H | 2.024976146  | -0.542639037 | -1.814223131 |
| C | 1.961188142  | -1.754821128 | 1.314593097  |
| H | 1.236544088  | -2.572068183 | 1.315656092  |
| H | 2.834745202  | -2.076105152 | 1.876885136  |
| H | 1.501940110  | -0.898521066 | 1.801510129  |
| C | 2.387785170  | -1.499326107 | -0.111036008 |
| H | -0.672869050 | -1.049050075 | 0.749399055  |
| H | 0.339083024  | 0.803195055  | -1.428267101 |
| H | 1.990931142  | 2.749777196  | 1.135043082  |
| H | -0.763629055 | -1.423191101 | -0.970606067 |
| O | 3.336444240  | -2.107234151 | -0.604293044 |
| C | 0.836613059  | 1.224659090  | 0.600367041  |
| C | 0.526476038  | 0.214504016  | -0.528377038 |
| N | 1.693338124  | -0.604794043 | -0.863064063 |
| C | -0.735187053 | -0.608375043 | -0.244784018 |
| O | 0.231245017  | 1.193591083  | 1.670075122  |
| N | 1.793306130  | 2.140069155  | 0.355141026  |
| C | -2.004751145 | 0.229530016  | -0.359246026 |
| H | -1.982453140 | 1.056353076  | 0.350232025  |
| H | -2.102787152 | 0.638675045  | -1.367431096 |
| S | -3.472679251 | -0.796382057 | -0.005996000 |
| C | -4.766595345 | 0.459986033  | -0.215047016 |
| H | -5.723130425 | -0.025434002 | -0.026241002 |
| H | -4.632182334 | 1.274316094  | 0.496973036  |
| H | -4.760892343 | 0.855072063  | -1.230991088 |
| C | 2.606359186  | 2.304032165  | -0.841069060 |
| H | 3.417936245  | 1.576202115  | -0.884733062 |
| H | 2.002997145  | 2.212023159  | -1.743280126 |
| H | 3.032301220  | 3.304599237  | -0.827180062 |

## 10A

|   |              |              |              |
|---|--------------|--------------|--------------|
| C | -2.220407162 | 1.021785074  | -0.369193027 |
| C | -2.882556208 | -0.131807009 | 0.358278026  |

|   |              |              |              |
|---|--------------|--------------|--------------|
| O | -2.599473188 | -0.190174014 | 1.671503122  |
| C | -1.237194087 | 0.434069031  | -1.421090103 |
| C | -0.105081008 | -0.361377026 | -0.846429059 |
| C | -0.105732008 | -1.710012123 | -0.596916043 |
| C | 1.180822084  | 0.124084009  | -0.422345030 |
| N | 1.093335077  | -2.089797153 | -0.038776003 |
| C | 1.906373137  | -0.989916073 | 0.077784006  |
| C | 1.796226130  | 1.384064100  | -0.426029031 |
| C | 3.206011229  | -0.871991061 | 0.570707042  |
| C | 3.087382221  | 1.504590108  | 0.059885004  |
| C | 3.785101270  | 0.387015028  | 0.555862038  |
| O | -3.591540261 | -0.949963069 | -0.184338013 |
| H | -0.847013059 | 1.271749092  | -2.003505145 |
| H | -1.813007129 | -0.188940014 | -2.106814154 |
| H | -0.880742065 | -2.436876176 | -0.777707059 |
| H | 1.268297089  | 2.251718162  | -0.800925060 |
| H | 3.571501255  | 2.473197177  | 0.061602005  |
| H | 3.741337269  | -1.733517124 | 0.949525069  |
| H | 4.792729345  | 0.513437037  | 0.931356065  |
| H | -3.030878220 | 1.492665110  | -0.933110065 |
| H | 1.340801098  | -3.030047216 | 0.216981015  |
| C | -1.575259116 | 2.062036149  | 0.542285038  |
| H | -0.747429055 | 1.635618115  | 1.106950078  |
| H | -1.188578087 | 2.885425206  | -0.059816004 |
| H | -2.297828165 | 2.467805178  | 1.250248091  |
| H | -3.048561217 | -0.967792072 | 2.042536147  |

## 10B

|   |              |              |              |
|---|--------------|--------------|--------------|
| C | -2.241450160 | 1.012796073  | -0.294324021 |
| C | -2.982968216 | -0.155232011 | 0.412204029  |
| O | -2.867096205 | -0.269832020 | 1.657936118  |
| C | -1.251012091 | 0.453675033  | -1.346301096 |
| C | -0.119373009 | -0.352712025 | -0.782551057 |
| C | -0.132024010 | -1.692814122 | -0.495585035 |
| C | 1.185523083  | 0.121160009  | -0.406242029 |
| N | 1.079334079  | -2.079213147 | 0.039076003  |
| C | 1.911089138  | -0.989967070 | 0.102949008  |
| C | 1.815710130  | 1.372778099  | -0.454267032 |
| C | 3.225427230  | -0.876272063 | 0.556612041  |
| C | 3.121300223  | 1.489530105  | -0.005956000 |
| C | 3.819674277  | 0.374920027  | 0.496021036  |
| O | -3.656971266 | -0.908885066 | -0.339656025 |
| H | -0.841825058 | 1.291431094  | -1.919449138 |
| H | -1.822915132 | -0.160867011 | -2.042727148 |
| H | -0.927553069 | -2.408027173 | -0.624337045 |
| H | 1.285358091  | 2.237758159  | -0.832511062 |

|   |              |              |              |
|---|--------------|--------------|--------------|
| H | 3.616092260  | 2.452372179  | -0.038529003 |
| H | 3.761081269  | -1.735047123 | 0.941727066  |
| H | 4.838860351  | 0.497086036  | 0.840845059  |
| H | -3.012219218 | 1.547612113  | -0.861204063 |
| H | 1.318817096  | -3.015437219 | 0.315547022  |
| C | -1.577689114 | 1.997189144  | 0.663643045  |
| H | -0.789965058 | 1.513706107  | 1.241597091  |
| H | -1.130491083 | 2.829769206  | 0.113075008  |
| H | -2.303291168 | 2.403569172  | 1.368977098  |

### 11A

|   |              |              |              |
|---|--------------|--------------|--------------|
| C | -2.220318160 | 1.021676075  | -0.369434027 |
| C | -2.882432206 | -0.131803009 | 0.358392026  |
| O | -2.599220188 | -0.189711014 | 1.671694118  |
| C | -1.237279089 | 0.433730031  | -1.421210105 |
| C | -0.105130007 | -0.361651026 | -0.846482061 |
| C | -0.105650008 | -1.710242125 | -0.596855045 |
| C | 1.180713084  | 0.124002009  | -0.422393030 |
| N | 1.093509076  | -2.089889150 | -0.038811003 |
| C | 1.906382138  | -0.989888069 | 0.077804005  |
| C | 1.795981127  | 1.384046098  | -0.426103031 |
| C | 3.205980230  | -0.871804060 | 0.570808041  |
| C | 3.087097222  | 1.504737109  | 0.059878004  |
| C | 3.784923271  | 0.387269028  | 0.555954041  |
| O | -3.591391260 | -0.950141069 | -0.183870013 |
| H | -0.847084059 | 1.271218089  | -2.003889142 |
| H | -1.813116129 | -0.189414014 | -2.106769153 |
| H | -0.880518065 | -2.437239175 | -0.777734057 |
| H | 1.267999093  | 2.251640161  | -0.801063058 |
| H | 3.571104256  | 2.473400180  | 0.061552004  |
| H | 3.741383271  | -1.733270125 | 0.949648066  |
| H | 4.792508345  | 0.513839037  | 0.931513066  |
| H | -3.030850216 | 1.492386106  | -0.933409066 |
| H | 1.340977097  | -3.030050216 | 0.217272016  |
| C | -1.575248114 | 2.062158151  | 0.541839037  |
| H | -0.747429055 | 1.635937119  | 1.106646081  |
| H | -1.188597084 | 2.885418205  | -0.060467005 |
| H | -2.297926163 | 2.468042176  | 1.249626091  |
| H | -3.048235218 | -0.967253068 | 2.042965146  |

### 11B

|   |             |              |              |
|---|-------------|--------------|--------------|
| C | 2.474687176 | -0.919809068 | 0.357288026  |
| C | 3.134029227 | 0.139074010  | -0.572025043 |
| O | 3.521177255 | 1.222807086  | -0.064719005 |
| C | 1.038357075 | -1.247160088 | -0.096428007 |
| C | 0.018485001 | -0.148774010 | 0.006887000  |

|   |              |              |              |
|---|--------------|--------------|--------------|
| C | 0.208970015  | 1.202276089  | 0.135993010  |
| C | -1.406125103 | -0.345073025 | -0.049586004 |
| N | -1.008407071 | 1.854188132  | 0.163972012  |
| C | -2.018158147 | 0.933142070  | 0.053290004  |
| C | -2.222762160 | -1.477412105 | -0.177443013 |
| C | -3.402901245 | 1.097676077  | 0.034661002  |
| C | -3.599658258 | -1.317786094 | -0.197082014 |
| C | -4.183770302 | -0.041751003 | -0.091903007 |
| O | 3.231266235  | -0.185458014 | -1.784146130 |
| H | 0.678976051  | -2.102758153 | 0.486592035  |
| H | 1.085776077  | -1.592518115 | -1.133546082 |
| H | 1.131544083  | 1.753243126  | 0.211513015  |
| H | -1.782803126 | -2.463901178 | -0.260747019 |
| H | -4.239774305 | -2.185811157 | -0.295640021 |
| H | -3.851173278 | 2.080181150  | 0.115374008  |
| H | -5.262402380 | 0.052280004  | -0.110292008 |
| H | 3.049481218  | -1.835835132 | 0.182557013  |
| H | -1.130033080 | 2.846577204  | 0.265208019  |
| C | 2.560239182  | -0.590793044 | 1.846214134  |
| H | 2.014898146  | 0.320549023  | 2.087927151  |
| H | 2.139655153  | -1.406185101 | 2.442202175  |
| H | 3.596812258  | -0.445589032 | 2.152781157  |

## 12A

|   |              |              |              |
|---|--------------|--------------|--------------|
| O | -0.932575892 | 0.824957285  | 1.637376344  |
| H | -1.075718338 | -1.920825893 | -1.059003851 |
| N | 0.303996416  | 2.214544185  | 0.369537250  |
| C | -0.291942978 | 0.005413121  | -0.550242816 |
| C | 1.649015936  | -1.405040289 | 1.355412322  |
| H | -3.056170172 | 0.030554562  | 0.687587273  |
| C | 1.994040016  | -1.062154319 | -0.073722782 |
| N | 1.072079049  | -0.431228127 | -0.851724837 |
| H | 1.246562747  | -2.420323300 | 1.374820321  |
| C | -0.335273815 | 1.051490201  | 0.585644266  |
| H | 1.378022092  | -0.302469166 | -1.805003906 |
| H | -0.634039923 | 0.506849212  | -1.455914882 |
| H | 0.281826516  | 2.849493235  | 1.154025305  |
| H | 2.568367006  | -1.396562436 | 1.936407364  |
| H | -1.056564291 | -1.616968872 | 0.680521270  |
| O | 3.085039045  | -1.368559514 | -0.549235818 |
| H | 0.918060989  | -0.743553123 | 1.812163356  |
| C | -1.241494235 | -1.167053813 | -0.290567797 |
| C | 1.060854538  | 2.629301094  | -0.803383834 |
| H | 2.046694533  | 2.163690903  | -0.836104837 |
| H | 0.527457460  | 2.389505165  | -1.722439899 |
| H | 1.183147717  | 3.708983155  | -0.761675830 |

S -3.011942289 -0.730906501 -0.417126807

**12B**

O 0.212583015 -1.034899076 1.550902114  
H -0.338517025 2.273537161 -0.711443049  
N 2.128676154 -1.129438079 0.371599027  
C 0.245594018 0.216175016 -0.505266036  
C -2.500000179 0.565829039 0.932075068  
H 1.743237125 2.880790206 0.454769033  
C -2.286853166 -0.255127018 -0.316228023  
N -1.066592079 -0.261954019 -0.922942067  
H -2.483664181 1.629173117 0.687124048  
C 0.866114061 -0.708478053 0.560943040  
H -1.052470073 -0.854544061 -1.740275124  
H 0.847538061 0.193463014 -1.411396100  
H 2.481109181 -1.724135123 1.107340081  
H -3.478266251 0.318157023 1.335431097  
H -0.116473008 1.770387125 0.978562073  
O -3.212796229 -0.886331066 -0.824956057  
H -1.730087124 0.362821026 1.671918119  
O 1.642534118 2.083741148 -0.076728005  
C 0.277352020 1.674422122 -0.032998002  
C 3.023080216 -0.840046059 -0.744747052  
H 2.662739191 -1.284420093 -1.674457122  
H 3.147130227 0.232733017 -0.878898062  
H 3.992845288 -1.274955091 -0.515695037

**13A**

H 0.015629001 0.432821031 -1.651454120  
H -6.116924448 -0.682298052 -0.533278039  
H -5.826632415 -0.665473046 1.173033087  
C 2.672448191 -2.075948150 -0.033916002  
O 2.375541172 2.841724204 0.518495037  
O -0.308779022 2.660838191 -0.438624032  
C 2.005461142 -0.776522056 -0.461867033  
O -1.290116093 -0.009068001 1.937884139  
H -1.856186136 0.012094001 -2.396814172  
H -4.290216311 -0.394070028 -2.168016154  
C -2.044566145 -0.085076006 0.972714071  
N -1.512748111 0.048084003 -0.345349025  
O 3.839498279 -2.141989153 0.282787021  
O 1.860521134 -3.128996223 -0.082701006  
C -0.100821007 0.301657022 -0.570308043  
O 4.009216286 0.621316046 -0.227752016  
C 0.425259031 1.571415114 0.103241008  
C 1.911377137 1.702006121 -0.194024014

|   |              |              |              |
|---|--------------|--------------|--------------|
| C | -4.161908302 | -0.395158028 | 0.031496002  |
| C | 2.670449192  | 0.443588032  | 0.203086015  |
| O | 0.625715044  | -0.841772061 | -0.148838011 |
| N | -5.473150373 | -0.598069041 | 0.233399017  |
| N | -3.379339242 | -0.292587021 | 1.095353079  |
| C | -2.329875165 | -0.078551006 | -1.429846103 |
| C | -3.653852263 | -0.299184022 | -1.302127094 |
| H | 2.158173156  | -0.700507051 | -1.550031109 |
| H | 2.618647190  | 0.324008023  | 1.291388093  |
| H | 2.043857148  | 1.854981135  | -1.273621094 |
| H | 0.279449020  | 1.496339108  | 1.180740083  |
| H | 4.503189326  | -0.167911012 | 0.038467003  |
| H | 0.098197007  | 3.474866250  | -0.115794008 |
| H | 3.308887240  | 2.967713216  | 0.306191022  |
| H | 2.363999171  | -3.920348281 | 0.174660013  |

### 13B

|   |              |              |              |
|---|--------------|--------------|--------------|
| H | -0.032730002 | -1.368020097 | 1.158468081  |
| H | -5.547245401 | 1.893094137  | -0.270492020 |
| H | -5.959877447 | 0.231712017  | -0.015234001 |
| C | 2.331096168  | 1.804032130  | -0.099969007 |
| O | 3.006409217  | -1.008816073 | -1.648432116 |
| O | 0.026202002  | -1.886346138 | -1.521468111 |
| C | 2.049299149  | 0.741457052  | 0.965543069  |
| O | -2.039120149 | -2.257430165 | 0.338085024  |
| H | -0.827779059 | 1.894065135  | -0.068377005 |
| H | -3.195745228 | 2.644655188  | -0.379908028 |
| C | -2.379003171 | -1.065242079 | 0.263599019  |
| N | -1.369744098 | -0.079536006 | 0.258816019  |
| O | 3.633551262  | 2.113134150  | -0.119822009 |
| O | 1.500720108  | 2.318934166  | -0.804474056 |
| C | 0.017980001  | -0.501291036 | 0.499024036  |
| O | 2.588493189  | -1.468071105 | 1.795536131  |
| C | 0.721792053  | -0.878500063 | -0.807130060 |
| C | 2.172109155  | -1.303918094 | -0.532238037 |
| C | -3.959348284 | 0.612083046  | -0.031513002 |
| C | 2.766187199  | -0.591953043 | 0.689271052  |
| O | 0.659050046  | 0.570922042  | 1.166505082  |
| N | -5.256593379 | 0.945050066  | -0.109641008 |
| N | -3.662879265 | -0.668027046 | 0.173465012  |
| C | -1.668820119 | 1.219704086  | -0.008272001 |
| C | -2.951429214 | 1.614014116  | -0.173908013 |
| H | 2.438635177  | 1.150200084  | 1.901298136  |
| H | 3.823494276  | -0.394746029 | 0.501156036  |
| H | 2.175134154  | -2.376663171 | -0.318234023 |
| H | 0.746562056  | 0.014786001  | -1.437117104 |



|   |              |              |              |
|---|--------------|--------------|--------------|
| H | 2.994264213  | -1.077489076 | 2.579421186  |
| H | -0.606772044 | -2.320784165 | -0.918768065 |
| H | 2.625973189  | -1.429207105 | -2.430003174 |
| H | 3.788976271  | 2.795049199  | -0.794574059 |

### 13C

|   |              |              |              |
|---|--------------|--------------|--------------|
| 1 | 0.029033002  | 0.395824029  | -1.641147118 |
| 1 | -6.118870445 | -0.701125051 | -0.584517045 |
| 1 | -5.846616423 | -0.682224051 | 1.124680082  |
| 6 | 2.719111194  | -2.140345153 | -0.045928003 |
| 8 | 2.380183173  | 2.812657201  | 0.531041038  |
| 8 | -0.301177022 | 2.630121187  | -0.449905032 |
| 6 | 2.011161143  | -0.820495061 | -0.446734032 |
| 8 | -1.321129098 | -0.022773002 | 1.941500139  |
| 1 | -1.832909131 | -0.014407001 | -2.398184175 |
| 1 | -4.271656308 | -0.410731030 | -2.199919160 |
| 6 | -2.060488147 | -0.103122007 | 0.964540071  |
| 7 | -1.513128108 | 0.022539002  | -0.345622025 |
| 8 | 3.982149288  | -2.087970152 | -0.158215011 |
| 8 | 2.041835146  | -3.110023223 | 0.323808023  |
| 6 | -0.090246007 | 0.262401019  | -0.559215038 |
| 8 | 4.016039291  | 0.543119037  | -0.111206008 |
| 6 | 0.427456031  | 1.540639113  | 0.107633008  |
| 6 | 1.915911138  | 1.661610122  | -0.172857013 |
| 6 | -4.169069298 | -0.411810029 | 0.000531000  |
| 6 | 2.651558189  | 0.398798029  | 0.243595017  |
| 8 | 0.621351046  | -0.878232061 | -0.134211010 |
| 7 | -5.483756408 | -0.613727047 | 0.188840013  |
| 7 | -3.398494247 | -0.308428022 | 1.072703076  |
| 6 | -2.318322168 | -0.101679008 | -1.436702102 |
| 6 | -3.645884261 | -0.317328023 | -1.326139094 |
| 1 | 2.143920153  | -0.704804050 | -1.533054108 |
| 1 | 2.543150181  | 0.273438020  | 1.330737094  |
| 1 | 2.064064147  | 1.803563131  | -1.252147091 |
| 1 | 0.268132019  | 1.477143108  | 1.183983087  |
| 1 | 4.339270312  | -0.391351028 | -0.161035011 |
| 1 | 0.123774009  | 3.443696250  | -0.150275011 |
| 1 | 3.325222237  | 2.901073210  | 0.354590026  |

### 13D

|   |              |              |              |
|---|--------------|--------------|--------------|
| H | 0.020975002  | -1.347317095 | 1.229104089  |
| H | -5.562021406 | 1.729118126  | -0.279180020 |
| H | -5.924818449 | 0.057806004  | -0.014125001 |
| C | 2.128393156  | 1.995044145  | -0.323014023 |
| O | 3.038222221  | -1.420081100 | -1.532236111 |
| O | 0.168817012  | -1.964078143 | -1.402123099 |

|   |              |              |              |
|---|--------------|--------------|--------------|
| C | 2.029703144  | 0.948263066  | 0.835158060  |
| O | -1.938301141 | -2.312945166 | 0.386319028  |
| H | -0.824493058 | 1.854297132  | -0.071043005 |
| H | -3.229838234 | 2.547874183  | -0.380615027 |
| C | -2.307550167 | -1.128332082 | 0.294133021  |
| N | -1.328847095 | -0.117207008 | 0.280867020  |
| O | 3.295986237  | 2.382391171  | -0.552272042 |
| O | 1.071091075  | 2.369158173  | -0.877683061 |
| C | 0.077171006  | -0.487799035 | 0.556543042  |
| O | 3.144221229  | -0.995877070 | 1.823694134  |
| C | 0.814514056  | -0.896974064 | -0.718524050 |
| C | 2.240823159  | -1.296077095 | -0.355676026 |
| C | -3.935144283 | 0.499253036  | -0.020470001 |
| C | 2.902091210  | -0.289656021 | 0.597951045  |
| O | 0.692312048  | 0.587323044  | 1.218935086  |
| N | -5.243678380 | 0.792360056  | -0.105937007 |
| N | -3.603522257 | -0.771177054 | 0.194741014  |
| C | -1.661066117 | 1.170833086  | 0.008283001  |
| C | -2.956552211 | 1.526318110  | -0.164674012 |
| H | 2.420337175  | 1.466679104  | 1.713258123  |
| H | 3.841322278  | 0.045801003  | 0.156954011  |
| H | 2.191065157  | -2.258881164 | 0.165000012  |
| H | 0.841682058  | -0.037308003 | -1.391297101 |
| H | 3.592923260  | -0.399460029 | 2.435142173  |
| H | -0.485441035 | -2.370474173 | -0.800931055 |
| H | 2.577564186  | -2.028341147 | -2.125289155 |

#### 14A

|   |              |              |              |
|---|--------------|--------------|--------------|
| O | -2.040008146 | 1.591529115  | 0.028056002  |
| H | 0.493572036  | -1.987067142 | -0.052870004 |
| C | -0.564774039 | -0.229681017 | 0.524126038  |
| N | -1.738622123 | -1.081202080 | 0.662930048  |
| C | -0.890059062 | 1.206209087  | 0.054555004  |
| H | -2.415051175 | -0.585529043 | 1.231574087  |
| H | -0.146847010 | -0.091142006 | 1.527658109  |
| H | 0.296964021  | -0.865199061 | -1.393739101 |
| C | 0.511794037  | -0.929129065 | -0.329315024 |
| C | 1.936807141  | -0.478392034 | -0.131346010 |
| O | 2.730930199  | -0.304148022 | -1.024600075 |
| O | 2.258008164  | -0.328558024 | 1.166892086  |
| H | 3.192633232  | -0.070673005 | 1.226080090  |
| C | 0.257177019  | 2.117583154  | -0.294912021 |
| H | 1.024747075  | 2.085996152  | 0.480926035  |
| H | 0.724639053  | 1.787335127  | -1.225898090 |
| H | -0.103506007 | 3.136178227  | -0.418388030 |
| C | -2.384468170 | -1.473099104 | -0.593908041 |

|   |              |              |              |
|---|--------------|--------------|--------------|
| H | -3.328241241 | -1.964652141 | -0.358467026 |
| H | -2.594066187 | -0.633544047 | -1.267606089 |
| H | -1.764798130 | -2.194824157 | -1.127767080 |

### 14B

|   |              |              |              |
|---|--------------|--------------|--------------|
| O | -2.056958148 | 1.551731112  | -0.028941002 |
| H | 0.556904041  | -1.957747140 | -0.051746004 |
| C | -0.529561040 | -0.217216016 | 0.515557037  |
| N | -1.689396124 | -1.090246079 | 0.692319049  |
| C | -0.896985066 | 1.184239087  | 0.001913000  |
| H | -2.385658173 | -0.577437039 | 1.221584089  |
| H | -0.103218007 | -0.026068002 | 1.508746108  |
| H | 0.423418030  | -0.805144057 | -1.364948096 |
| C | 0.588208040  | -0.890615063 | -0.290648021 |
| C | 2.032376145  | -0.429129031 | 0.031873002  |
| O | 2.860238205  | -0.530347038 | -0.906711063 |
| O | 2.268534161  | -0.033705002 | 1.200314085  |
| C | 0.226104016  | 2.105045152  | -0.396500028 |
| H | 1.002378070  | 2.103386149  | 0.370005027  |
| H | 0.694193051  | 1.736416126  | -1.312708094 |
| H | -0.154888011 | 3.110660226  | -0.562420042 |
| C | -2.310510167 | -1.549386111 | -0.552875039 |
| H | -3.237568233 | -2.070848151 | -0.311330022 |
| H | -2.546816183 | -0.741335055 | -1.257290091 |
| H | -1.655273118 | -2.259220165 | -1.059338074 |

### 15

|   |              |              |              |
|---|--------------|--------------|--------------|
| P | -5.890054414 | -0.281841020 | -0.522836038 |
| O | -6.685769459 | -1.157097084 | -1.552206112 |
| O | -6.827325484 | 0.060908004  | 0.693621048  |
| O | -5.245903380 | 0.860475063  | -1.191462087 |
| O | -4.877284350 | -1.320238095 | 0.142293010  |
| P | -3.655995262 | -1.238896091 | 1.191022087  |
| O | -4.236103307 | -0.542708041 | 2.476603179  |
| O | -3.031861219 | -2.546962183 | 1.343280097  |
| O | -2.766201201 | -0.046043003 | 0.654236047  |
| P | -1.929265138 | 0.190339014  | -0.729280053 |
| O | -2.699830193 | 1.379883097  | -1.384713099 |
| O | -1.744787128 | -1.042196076 | -1.494748110 |
| O | -0.581129040 | 0.806515060  | -0.225829016 |
| C | -0.495496036 | 2.012240146  | 0.576023041  |
| C | 0.948167068  | 2.425497177  | 0.686393047  |
| O | 1.695805122  | 1.433094103  | 1.407337099  |
| C | 1.698172121  | 2.592927186  | -0.632733046 |
| O | 1.346656095  | 3.820807272  | -1.225674089 |
| C | 3.156586228  | 2.439302178  | -0.176173013 |

|   |              |              |              |
|---|--------------|--------------|--------------|
| O | 3.576569260  | 3.656089265  | 0.411582030  |
| C | 3.010063218  | 1.335991094  | 0.895052066  |
| N | 3.222141229  | -0.008820001 | 0.363519026  |
| C | 2.282904165  | -0.921878066 | -0.078397006 |
| N | 2.823231205  | -2.029600145 | -0.513685037 |
| C | 4.183599304  | -1.845743135 | -0.360361026 |
| C | 5.283445378  | -2.703602195 | -0.659326049 |
| O | 5.287811381  | -3.833854275 | -1.135467080 |
| N | 6.508026494  | -2.076556148 | -0.328085024 |
| C | 6.657780480  | -0.823509059 | 0.207475015  |
| N | 7.920506566  | -0.381671028 | 0.412299029  |
| N | 5.638066399  | -0.039891003 | 0.483494035  |
| C | 4.446584320  | -0.593437042 | 0.183114013  |
| H | -0.911395065 | 1.805424131  | 1.562106114  |
| H | -1.064055076 | 2.808921204  | 0.096137007  |
| H | 0.973243069  | 3.375665244  | 1.230909086  |
| H | 1.458444106  | 1.752755124  | -1.290578092 |
| H | 1.668660123  | 3.835688276  | -2.134248153 |
| H | 3.824398275  | 2.127471154  | -0.981518073 |
| H | 4.516405326  | 3.592309256  | 0.618623042  |
| H | 3.738219267  | 1.482497106  | 1.693642120  |
| H | 1.230901090  | -0.700293052 | -0.036108003 |
| H | 8.688448642  | -1.030372076 | 0.455318033  |
| H | 8.018481564  | 0.464672034  | 0.948519066  |
| H | 7.330378522  | -2.628243190 | -0.533327036 |
| H | -3.694271266 | 1.252767091  | -1.388370100 |
| H | -4.559301328 | -1.159585084 | 3.149146229  |
| H | -7.358512548 | 0.863790063  | 0.588558043  |
| H | -7.230143514 | -1.867863135 | -1.182415087 |

## 16

|   |              |              |              |
|---|--------------|--------------|--------------|
| C | -1.244075805 | -0.865169252 | 0.576840937  |
| C | -1.515582104 | 0.644146806  | 0.596315935  |
| C | -0.493973160 | 1.364467047  | -0.285400126 |
| C | 0.915556012  | 0.987731275  | 0.129011904  |
| C | 1.086386303  | -0.532415803 | 0.103702901  |
| O | 0.100537340  | -1.138891026 | 0.945009965  |
| N | -2.858021270 | 1.045970591  | 0.191257908  |
| O | -0.634821428 | 2.776208123  | -0.165597118 |
| O | 1.891436976  | 1.553493495  | -0.751839160 |
| C | 2.441250482  | -0.990712585 | 0.633797941  |
| O | 3.506910499  | -0.670196366 | -0.252592124 |
| O | -1.553477741 | -1.343096341 | -0.703583159 |
| C | -1.532863477 | -2.764313441 | -0.820223164 |
| H | -1.844979754 | -1.380389398 | 1.334544990  |
| H | -1.359254154 | 0.980098862  | 1.623882012  |

|   |              |              |              |
|---|--------------|--------------|--------------|
| H | -0.640522117 | 1.061788996  | -1.330186199 |
| H | 1.086178955  | 1.343533335  | 1.152996976  |
| H | 0.974952359  | -0.884888846 | -0.927539173 |
| H | -3.536875283 | 0.832094452  | 0.911894957  |
| H | -3.132791201 | 0.540901504  | -0.644823153 |
| H | -1.589223527 | 2.945764959  | -0.184446119 |
| H | 1.796336792  | 2.513721549  | -0.728111159 |
| H | 2.605075413  | -0.557671523 | 1.628824014  |
| H | 2.423834682  | -2.076307668 | 0.737464949  |
| H | 3.400758321  | 0.261107680  | -0.498881142 |
| H | -1.838098460 | -3.001454515 | -1.837205236 |
| H | -0.531058337 | -3.160447285 | -0.639074150 |
| H | -2.233059446 | -3.222193602 | -0.113612114 |

### 17A

|   |              |              |              |
|---|--------------|--------------|--------------|
| O | -3.127685223 | -1.035061073 | -0.495367036 |
| O | -0.974596069 | -0.215128016 | 0.352550025  |
| H | 2.993842215  | 0.337241024  | -0.901915066 |
| O | -3.003910215 | 0.259201019  | 1.771435129  |
| C | 1.341157096  | 1.422874103  | -0.075454005 |
| O | 2.937744209  | -1.932637140 | 0.350215025  |
| H | 3.974699287  | -0.016182001 | 1.366897098  |
| H | 0.815011059  | 1.491533110  | 0.881258066  |
| C | 0.853211063  | -1.341367095 | -0.735161054 |
| H | -0.069899005 | -3.015612218 | -1.182081087 |
| H | 3.946136284  | 1.539440113  | 0.905187064  |
| C | 1.823168132  | 2.794175199  | -0.497994036 |
| H | -2.624848190 | 2.239908159  | -0.085356006 |
| O | -2.755240200 | 1.395971102  | -0.539276041 |
| H | 2.544928185  | -2.806778201 | 0.469456034  |
| C | -0.193886014 | -0.232556017 | -0.871067065 |
| H | -4.081895294 | -0.970351067 | -0.638531045 |
| P | -2.514758181 | 0.127804009  | 0.394760028  |
| O | 0.282412020  | -2.594766188 | -0.389627028 |
| O | 0.397519028  | 1.001213071  | -1.090400080 |
| H | 2.367284171  | 2.734854196  | -1.442658103 |
| C | 2.468684179  | 0.391662028  | 0.063077005  |
| H | 1.369996098  | -1.403619099 | -1.697987121 |
| H | -0.857313060 | -0.422072030 | -1.714938123 |
| H | 2.478819177  | 3.220880232  | 0.260842019  |
| C | 1.873315137  | -0.984341069 | 0.335088024  |
| N | 3.353697239  | 0.760969055  | 1.169469084  |
| H | 1.371750098  | -0.970849071 | 1.310319097  |
| H | 0.973125067  | 3.464733247  | -0.625357045 |

**17B**

|   |              |              |              |
|---|--------------|--------------|--------------|
| O | 2.753625579  | 1.261472359  | -0.011832714 |
| O | 0.938226029  | -0.486080683 | 0.294358499  |
| H | -3.047119564 | 0.136992365  | -0.839273651 |
| O | 2.974907110  | -0.671508789 | 1.725899024  |
| C | -1.750127706 | -1.336139814 | 0.025711055  |
| O | -2.244507196 | 2.370629254  | 0.237103757  |
| H | -3.769466702 | 0.919687034  | 1.419174958  |
| H | -1.236656517 | -1.498479847 | 0.978175466  |
| C | -0.506742702 | 1.098686541  | -0.880067407 |
| H | 1.253930456  | 1.916151390  | -0.446717097 |
| H | -4.232942066 | -0.596010547 | 1.072662382  |
| C | -2.640681644 | -2.521147150 | -0.286339944 |
| H | 3.220514258  | -1.992734244 | -0.557173096 |
| O | 3.165743794  | -1.061068775 | -0.804794679 |
| H | -1.582804109 | 3.073778302  | 0.190820215  |
| C | 0.188140842  | -0.267751429 | -0.901963846 |
| P | 2.535179004  | -0.165752181 | 0.399714057  |
| O | 0.376008773  | 2.203078925  | -0.805245125 |
| O | -0.765244675 | -1.285186945 | -1.030147594 |
| H | -3.173461839 | -2.362661120 | -1.226381298 |
| C | -2.515612273 | -0.007341781 | 0.113208501  |
| H | -1.054554302 | 1.181292983  | -1.824958524 |
| H | 0.844817386  | -0.353717007 | -1.769918666 |
| H | -3.369667877 | -2.675615306 | 0.509389517  |
| C | -1.522991665 | 1.137231912  | 0.256061355  |
| N | -3.421363414 | -0.020495457 | 1.265713354  |
| H | -0.992147989 | 1.036395494  | 1.210508832  |
| H | -2.040566724 | -3.427240981 | -0.374400986 |

**17C**

|   |              |              |              |
|---|--------------|--------------|--------------|
| O | 2.638712189  | 1.260040093  | 0.365236026  |
| O | 0.936349069  | -0.618294042 | 0.244225018  |
| H | -3.023393219 | 0.241226017  | -0.817306059 |
| O | 2.994771218  | -0.937652067 | 1.628974115  |
| C | -1.799719129 | -1.301185095 | 0.033825002  |
| O | -2.056760146 | 2.435796178  | 0.225877016  |
| H | -3.658474261 | 1.087562076  | 1.441775102  |
| H | -1.277255091 | -1.484326107 | 0.978353069  |
| C | -0.424804031 | 1.044981078  | -0.911128063 |
| H | 1.338719098  | 1.799804131  | -0.342837024 |
| H | -4.218452304 | -0.400176029 | 1.120413083  |
| C | -2.771319197 | -2.432308175 | -0.240304017 |
| O | 3.198168230  | -0.868177064 | -0.936241069 |
| H | -1.346226096 | 3.076483223  | 0.081381006  |
| C | 0.198194015  | -0.360129026 | -0.916561068 |

|   |              |              |              |
|---|--------------|--------------|--------------|
| P | 2.597115185  | -0.279431020 | 0.326696024  |
| O | 0.519828037  | 2.095203153  | -0.865328063 |
| O | -0.844205059 | -1.316844095 | -1.040899073 |
| H | -3.317024239 | -2.251835163 | -1.169316083 |
| C | -2.483379177 | 0.072564005  | 0.126760009  |
| H | -0.983669072 | 1.150742083  | -1.848306131 |
| H | 0.826504059  | -0.491565035 | -1.801986130 |
| H | -3.489336253 | -2.534698183 | 0.574022042  |
| C | -1.419522103 | 1.153215082  | 0.239542017  |
| N | -3.370064241 | 0.126275009  | 1.294900094  |
| H | -0.878579064 | 1.025863073  | 1.184951085  |
| H | -2.230707158 | -3.374941245 | -0.333445024 |

## 18

|   |              |              |              |
|---|--------------|--------------|--------------|
| H | -1.973146140 | -0.707394050 | 2.028350143  |
| C | 4.997705359  | -1.010737071 | -0.088174006 |
| C | 1.487897106  | -1.228740089 | 0.001634000  |
| C | -2.248115164 | -0.256679019 | 1.066736078  |
| C | 0.644939048  | 1.159658084  | 0.104750008  |
| N | 1.672871119  | 0.134684010  | 0.027819002  |
| N | 2.605959187  | -1.907339139 | -0.042566003 |
| O | -1.510070109 | 3.133012223  | -0.420608030 |
| N | 3.706430267  | 1.491394105  | 0.014046001  |
| C | 3.033437220  | 0.335592024  | 0.002353000  |
| C | -1.550080111 | 1.095354079  | 0.957552069  |
| C | 3.592907258  | -0.939962069 | -0.046585003 |
| O | -5.919767452 | -0.520572037 | 0.068123005  |
| O | -3.643277264 | -0.082049006 | 0.986628073  |
| O | -4.154898301 | -2.388633171 | -0.003828000 |
| C | 5.022311360  | 1.297535095  | -0.026655002 |
| H | -1.883153135 | -0.924616066 | 0.279802020  |
| H | 5.163801371  | -3.047124221 | -0.203548015 |
| H | 0.021937002  | 1.788085130  | -1.898013136 |
| N | 5.692956421  | 0.140479010  | -0.077976005 |
| H | -2.502944183 | 1.366812096  | -0.974887069 |
| C | -0.329280024 | 1.169564087  | -1.074940077 |
| O | -0.144334010 | 0.939641070  | 1.266808090  |
| H | -1.980963141 | 1.782314129  | 1.690387119  |
| O | -3.929777282 | -0.366038026 | -1.545711112 |
| H | 1.180606084  | 2.106165150  | 0.190638014  |
| H | -0.488630035 | 0.156923011  | -1.444681105 |
| C | -1.607937118 | 1.700170125  | -0.447446032 |
| H | 5.636643389  | 2.191876158  | -0.019033001 |
| H | 0.500177036  | -1.659141118 | 0.032498002  |
| N | 5.663660427  | -2.178967154 | -0.125314009 |
| H | 6.664523469  | -2.180313159 | -0.221800016 |

|   |              |              |              |
|---|--------------|--------------|--------------|
| P | -4.484095325 | -0.918083066 | -0.234331017 |
| H | -2.316282168 | 3.482465251  | -0.023462002 |

## 19

|   |              |              |              |
|---|--------------|--------------|--------------|
| H | -0.241074017 | 1.489484109  | -1.861655135 |
| C | 0.846295061  | 2.047256149  | 1.260015089  |
| H | 1.722597122  | 1.398974103  | 1.321463093  |
| H | 1.090729081  | 3.012637215  | 1.694942124  |
| H | 0.029644002  | 1.591505117  | 1.814303132  |
| C | 0.479531034  | 2.261544163  | -0.187010014 |
| H | 0.019412001  | -1.952731138 | 0.377711027  |
| H | -0.698028052 | -0.602028044 | -1.454386105 |
| H | -3.545898257 | -0.892910062 | 0.748295054  |
| H | 0.539556039  | -0.570957042 | 1.328264095  |
| O | 0.671325048  | 3.344765240  | -0.737552052 |
| C | -1.881804135 | 0.048314003  | 0.224819016  |
| C | -0.528845038 | -0.078133005 | -0.514386037 |
| N | -0.013960001 | 1.220742089  | -0.915623064 |
| S | 2.071723151  | -1.051264073 | -0.477121034 |
| C | 0.430488031  | -0.946455069 | 0.312794022  |
| O | -2.178091154 | 1.079729078  | 0.820404058  |
| N | -2.708195194 | -1.016207075 | 0.197366014  |
| C | 2.801608202  | -2.321929167 | 0.595703042  |
| H | 2.828180203  | -1.982468142 | 1.631007119  |
| H | 2.245486163  | -3.256603236 | 0.526525038  |
| H | 3.820754275  | -2.484386180 | 0.247926018  |
| C | -2.535792183 | -2.311428168 | -0.444926032 |
| H | -2.073123148 | -3.039487219 | 0.224912016  |
| H | -3.514876252 | -2.685747193 | -0.738042054 |
| H | -1.930594140 | -2.227784158 | -1.344398095 |

## 20

|   |              |              |              |
|---|--------------|--------------|--------------|
| N | 0.386143028  | -0.446458032 | -0.470767034 |
| H | 4.303481308  | -2.207909160 | -0.939670069 |
| H | -4.196115303 | 2.655911190  | 0.065282005  |
| O | 2.760134200  | 2.351898168  | -0.002417000 |
| H | 4.306654308  | 1.624453116  | 1.317837097  |
| C | 2.057321148  | 1.183784085  | 0.395175028  |
| C | -4.943936357 | 0.369130026  | 0.331010024  |
| H | -5.134675370 | 1.010057073  | 1.192977084  |
| C | 3.600192261  | -0.476551034 | -0.409307030 |
| N | -3.505051251 | 0.171436012  | 0.138655010  |
| H | 1.364781098  | -2.345909167 | -0.289721021 |
| O | -3.744966272 | -2.075456147 | 0.632789043  |
| N | -0.729444051 | -2.302134165 | 0.102728007  |
| O | 4.123487298  | 0.744152056  | 1.677974119  |



|   |              |              |              |
|---|--------------|--------------|--------------|
| H | 1.290813094  | 1.406182101  | 1.137325079  |
| C | -2.712495193 | 1.244986090  | -0.204591015 |
| H | 2.158634154  | 3.104695223  | -0.009286001 |
| H | 2.617900188  | -0.592485041 | 1.487333109  |
| C | -1.597473114 | -1.225943086 | 0.058313004  |
| C | -0.918948065 | -0.070328005 | -0.294201021 |
| C | 1.484441108  | 0.453752032  | -0.829307058 |
| C | -2.996778218 | -1.158580082 | 0.309825023  |
| N | -3.313890240 | 2.450531176  | -0.369326027 |
| H | 1.101845078  | 1.158110082  | -1.566982112 |
| C | 0.436467031  | -1.804091128 | -0.213783015 |
| O | 3.819805275  | -1.837881132 | -0.190716014 |
| H | 4.500700324  | 0.009232001  | -0.792017059 |
| O | 2.555442185  | -0.274845020 | -1.380079099 |
| H | -5.387056410 | 0.807333057  | -0.562792043 |
| H | -2.686728193 | 3.230286230  | -0.481893034 |
| C | 3.104254223  | 0.180183013  | 0.889967064  |
| N | -1.414961103 | 1.169565082  | -0.425716031 |
| H | -5.389312398 | -0.601526045 | 0.513584037  |

#### 21A

|   |              |              |              |
|---|--------------|--------------|--------------|
| C | -0.631428147 | -0.814928159 | -0.746693102 |
| P | 0.715561911  | 0.096291959  | 0.022080956  |
| O | -2.440156339 | 0.674901879  | 0.008597955  |
| O | 1.963421000  | 0.065015006  | -0.978258118 |
| H | -0.345956088 | -1.865900221 | -0.821901106 |
| H | -1.723730308 | 1.251969944  | 0.318912978  |
| O | 0.332153830  | 1.459066043  | 0.462515988  |
| H | -0.752008174 | -0.425182136 | -1.759747170 |
| O | 1.182578984  | -0.899248092 | 1.174863040  |
| H | -1.822014229 | -1.017571220 | 1.057890029  |
| H | -2.710754279 | -1.279283274 | -0.443324077 |
| C | -1.947734249 | -0.660330200 | 0.028822957  |
| H | 1.775380013  | -0.501241042 | 1.828163089  |
| H | 2.016648976  | 0.846500064  | -1.545738159 |

#### 21B

|   |              |              |              |
|---|--------------|--------------|--------------|
| C | -0.585721045 | -1.039948073 | -0.487160035 |
| P | 0.813942058  | 0.077345006  | -0.110543008 |
| O | -2.330248166 | 0.659351047  | -0.159309011 |
| O | 2.019597144  | -0.317249023 | -0.900385067 |
| H | -0.304384022 | -2.059095146 | -0.211171015 |
| H | -1.521073112 | 1.215156088  | -0.162430011 |
| O | 0.288077021  | 1.495382107  | -0.164945012 |
| H | -0.735982052 | -1.020707072 | -1.570198112 |
| O | 1.146247082  | -0.268314019 | 1.464755106  |

|   |              |              |              |
|---|--------------|--------------|--------------|
| H | -1.750921128 | -0.705691052 | 1.305180092  |
| H | -2.685069196 | -1.339699097 | -0.049337004 |
| C | -1.886209134 | -0.643499046 | 0.216005016  |
| H | 0.630501045  | 0.297173022  | 2.052105148  |

### 21C

|   |              |              |              |
|---|--------------|--------------|--------------|
| C | -0.578679040 | -1.012802074 | -0.529059038 |
| P | 0.845807059  | 0.051441004  | 0.029808002  |
| O | -2.258498161 | 0.714230051  | -0.079927006 |
| O | 1.990500143  | -0.215054015 | -0.945751067 |
| H | -0.340205024 | -2.062766149 | -0.331999024 |
| H | -1.380773099 | 1.193628083  | -0.070938005 |
| O | 0.270931020  | 1.488484107  | -0.087156006 |
| H | -0.688341049 | -0.900660064 | -1.613217116 |
| O | 1.142673082  | -0.349358025 | 1.475369105  |
| H | -1.829642134 | -0.855161060 | 1.222917086  |
| H | -2.722769196 | -1.267041092 | -0.243140018 |
| C | -1.903025138 | -0.651538047 | 0.143890010  |

### 22A

|   |              |              |              |
|---|--------------|--------------|--------------|
| H | 3.937109282  | -1.435699105 | -0.736037054 |
| H | 3.875576276  | -0.235909017 | 0.433881031  |
| C | 2.045377146  | -0.584361043 | -0.306098022 |
| N | 3.412641245  | -1.100758080 | 0.070048005  |
| C | 1.050565078  | -0.960137068 | 0.804261056  |
| C | 2.217982160  | 0.959195069  | -0.458396033 |
| O | 3.224417231  | 1.429985102  | 0.138925010  |
| H | 1.371187101  | -0.484495035 | 1.734083126  |
| H | 1.754611129  | -1.031056075 | -1.252971089 |
| H | 1.111380080  | -2.041672149 | 0.958261071  |
| O | 1.354012098  | 1.552938113  | -1.117836079 |
| C | -0.376857027 | -0.586040043 | 0.498494036  |
| C | -0.999415069 | 0.478820034  | 1.144331085  |
| C | -1.115728081 | -1.306088092 | -0.442841032 |
| C | -2.316793168 | 0.824170059  | 0.863904063  |
| H | -0.449398032 | 1.055787078  | 1.877893134  |
| C | -2.429717175 | -0.973505070 | -0.737524053 |
| H | -0.659068049 | -2.145074156 | -0.955317068 |
| C | -3.035421217 | 0.097170007  | -0.081757006 |
| H | -2.784415202 | 1.655708118  | 1.378153100  |
| H | -2.997542217 | -1.536907111 | -1.466581106 |
| O | -4.333505312 | 0.381541027  | -0.403068029 |
| H | -4.647001334 | 1.132783082  | 0.115971008  |
| H | 3.399737247  | -1.839223131 | 0.771920056  |

### 22B

|   |              |              |              |
|---|--------------|--------------|--------------|
| H | -4.099734277 | -0.994634736 | 0.700871210  |
| H | -3.817498227 | -0.589337728 | -0.835915900 |
| C | -2.135070108 | -0.616990864 | 0.283722178  |
| N | -3.459723245 | -1.157404800 | -0.071156847 |
| C | -1.131791071 | -1.036467976 | -0.806570899 |
| C | -2.138394987 | 0.926608249  | 0.456119191  |
| O | -2.655541973 | 1.584425334  | -0.483991877 |
| H | -1.458026056 | -0.589903916 | -1.749462970 |
| H | -1.830983122 | -1.065039922 | 1.232076245  |
| H | -1.202693160 | -2.121554048 | -0.919285907 |
| O | -1.631275914 | 1.392717238  | 1.506936269  |
| C | 0.293668065  | -0.641917060 | -0.519386879 |
| C | 0.862550195  | 0.500902978  | -1.079944919 |
| C | 1.085301061  | -1.400381175 | 0.347334183  |
| C | 2.170031319  | 0.880421902  | -0.792154899 |
| H | 0.271876203  | 1.113321070  | -1.750413970 |
| C | 2.391839186  | -1.038571254 | 0.646194203  |
| H | 0.672195963  | -2.296227208 | 0.797091213  |
| C | 2.938864313  | 0.108269785  | 0.074400163  |
| H | 2.591787423  | 1.772326930  | -1.241630932 |
| H | 2.997633183  | -1.636302347 | 1.315347254  |
| O | 4.233118435  | 0.421678705  | 0.396287186  |
| H | 4.501112517  | 1.227367742  | -0.062704846 |

## 22C

|   |              |              |              |
|---|--------------|--------------|--------------|
| H | 4.074770293  | -0.941399066 | -0.738519054 |
| H | 3.777108270  | -0.659276047 | 0.859159063  |
| C | 2.026954147  | -0.620823044 | -0.315532023 |
| N | 3.412219247  | -1.117124082 | 0.019962001  |
| C | 1.055061073  | -1.025646073 | 0.811389058  |
| C | 2.042538148  | 0.887251062  | -0.522423038 |
| O | 2.890959209  | 1.486326106  | 0.321257023  |
| H | 1.391020098  | -0.569304040 | 1.744205128  |
| H | 1.742500124  | -1.085090078 | -1.255653092 |
| H | 1.129349082  | -2.108757150 | 0.930848065  |
| O | 1.335797097  | 1.447672105  | -1.313185094 |
| C | -0.371449027 | -0.635853048 | 0.518224037  |
| C | -0.937920069 | 0.498397036  | 1.095451077  |
| C | -1.152106085 | -1.395531101 | -0.355756026 |
| C | -2.245485163 | 0.873072064  | 0.811508060  |
| H | -0.354913026 | 1.102847081  | 1.779867129  |
| C | -2.457704179 | -1.034475073 | -0.649604047 |
| H | -0.737111051 | -2.286901162 | -0.811686059 |
| C | -3.008960217 | 0.105701008  | -0.065489005 |
| H | -2.671486195 | 1.756854126  | 1.271283093  |
| H | -3.061586222 | -1.627666116 | -1.323594095 |

|   |              |              |              |
|---|--------------|--------------|--------------|
| O | -4.298316311 | 0.414432030  | -0.385926028 |
| H | -4.576351329 | 1.214477085  | 0.077736006  |
| H | 2.863781206  | 2.449484178  | 0.192576014  |
| H | 3.404296247  | -2.125397155 | 0.190267014  |

### 22D

|   |              |              |              |
|---|--------------|--------------|--------------|
| H | -4.107582124 | -0.921103086 | 0.680539114  |
| H | -3.788514104 | -0.652702062 | -0.896664003 |
| C | -2.108841982 | -0.674408040 | 0.276900082  |
| N | -3.454440077 | -1.131201091 | -0.066470942 |
| C | -1.116583908 | -1.084726051 | -0.828260996 |
| C | -2.030159004 | 0.827071067  | 0.537223103  |
| O | -2.436995045 | 1.545958116  | -0.526481975 |
| H | -1.447933937 | -0.645004026 | -1.771403066 |
| H | -1.813415956 | -1.149060072 | 1.213006152  |
| H | -1.193685896 | -2.168809131 | -0.929868002 |
| O | -1.660468983 | 1.336151111  | 1.569030176  |
| C | 0.305953189  | -0.677969001 | -0.536258974 |
| C | 0.861394213  | 0.471701089  | -1.096139018 |
| C | 1.097121256  | -1.425193042 | 0.340466087  |
| C | 2.160097297  | 0.869757139  | -0.796611995 |
| H | 0.271469159  | 1.072362121  | -1.777983068 |
| C | 2.394515346  | -1.043709994 | 0.649578107  |
| H | 0.692494244  | -2.325535113 | 0.788421120  |
| C | 2.930468366  | 0.110349095  | 0.080073068  |
| H | 2.573503312  | 1.765875206  | -1.244624027 |
| H | 3.002512398  | -1.630820028 | 1.325696157  |
| O | 4.213713453  | 0.442222139  | 0.415237092  |
| H | 4.477208458  | 1.251625201  | -0.040215940 |
| H | -2.378759051 | 2.489694182  | -0.305706959 |

### 23A

|   |              |              |              |
|---|--------------|--------------|--------------|
| C | 1.070337076  | -0.354757026 | -0.360952026 |
| N | 1.985996141  | -1.441040101 | -0.033685002 |
| C | -0.353984025 | -0.756638057 | 0.051612004  |
| C | -1.426264102 | 0.262774019  | -0.313303023 |
| C | -2.821132202 | -0.217590015 | -0.005266000 |
| O | -3.742245269 | 0.712369051  | -0.326139024 |
| H | 1.099776080  | -0.204336014 | -1.444200104 |
| H | -0.366612026 | -0.930455066 | 1.130514081  |
| H | -0.576540042 | -1.709746122 | -0.428421031 |
| O | -3.113894224 | -1.289837095 | 0.467335033  |
| C | 1.455354102  | 0.968541069  | 0.331333024  |
| O | 1.755358126  | 0.966203069  | 1.508496109  |
| H | -1.396736101 | 0.509582037  | -1.378516100 |
| H | -1.293502092 | 1.209453087  | 0.216754015  |

|   |              |              |              |
|---|--------------|--------------|--------------|
| H | -4.621928334 | 0.360232026  | -0.112675008 |
| C | 3.354441241  | -1.233588088 | -0.506457037 |
| H | 3.354957242  | -1.169432083 | -1.596509117 |
| H | 3.835552278  | -0.326876024 | -0.113200008 |
| H | 3.965648287  | -2.089679151 | -0.219684016 |
| H | 1.993568143  | -1.559228114 | 0.974583072  |
| C | 1.465525106  | 2.220075162  | -0.498958036 |
| H | 1.581877112  | 3.102316222  | 0.126999009  |
| H | 2.302467165  | 2.156067157  | -1.201556085 |
| H | 0.560094038  | 2.296603167  | -1.103877082 |

### 23B

|   |              |              |              |
|---|--------------|--------------|--------------|
| C | 1.018757075  | -0.371204027 | -0.341917024 |
| N | 1.927807138  | -1.450576103 | 0.031515002  |
| C | -0.413790030 | -0.730629053 | 0.087422006  |
| C | -1.481807107 | 0.284474021  | -0.302055022 |
| C | -2.940583213 | -0.151457011 | -0.022317002 |
| O | -3.802466275 | 0.761102053  | -0.109707008 |
| H | 1.047431073  | -0.269558020 | -1.431311103 |
| H | -0.417266030 | -0.870487060 | 1.172925082  |
| H | -0.655424050 | -1.696842124 | -0.354716026 |
| O | -3.157415226 | -1.358732100 | 0.245670018  |
| C | 1.416984100  | 0.976201069  | 0.284700021  |
| O | 1.747389124  | 1.028049073  | 1.453869104  |
| H | -1.419867100 | 0.501218036  | -1.374604099 |
| H | -1.328671096 | 1.240043088  | 0.205025015  |
| C | 3.300317235  | -1.267664092 | -0.438010032 |
| H | 3.309352238  | -1.246611088 | -1.529969111 |
| H | 3.782599273  | -0.347277025 | -0.078624006 |
| H | 3.907552283  | -2.113553152 | -0.113725008 |
| H | 1.927611136  | -1.529153109 | 1.043559073  |
| C | 1.402410099  | 2.193303159  | -0.596739044 |
| H | 1.513435110  | 3.102215223  | -0.008622001 |
| H | 2.235208160  | 2.111277150  | -1.302599094 |
| H | 0.489592035  | 2.231257159  | -1.193108087 |

### 24

|   |              |              |              |
|---|--------------|--------------|--------------|
| H | -1.207908265 | -0.488342780 | -1.801771130 |
| C | -3.362982447 | -0.610170293 | -0.587484041 |
| H | -3.736248659 | -1.425511268 | 0.032487002  |
| H | -4.077432308 | 0.211220928  | -0.520653038 |
| H | -3.303333519 | -0.945187334 | -1.621819115 |
| C | -2.043415243 | -0.139076563 | -0.011532001 |
| H | 0.672970149  | 0.706823877  | -1.665326121 |
| H | 2.005176503  | -2.523931665 | 0.359738026  |
| O | -1.968365156 | 0.225385446  | 1.159529082  |

|   |              |              |              |
|---|--------------|--------------|--------------|
| C | 1.336248813  | -0.954930398 | -0.629863047 |
| C | 0.395501027  | 0.271011908  | -0.703924049 |
| N | -1.001528169 | -0.148404802 | -0.876545065 |
| C | 0.664653298  | 1.366248925  | 0.348508025  |
| O | 2.086582819  | -1.169786585 | -1.585002116 |
| N | 1.330755626  | -1.775457453 | 0.436741031  |
| H | 0.338307195  | 1.021957973  | 1.326191096  |
| C | -0.117611469 | 2.635331196  | 0.003238000  |
| H | 0.182664641  | 3.020858153  | -0.975150070 |
| H | -1.191476586 | 2.455320426  | -0.012376001 |
| H | 0.081420723  | 3.411650207  | 0.744347053  |
| C | 2.167439473  | 1.660541602  | 0.410475030  |
| H | 2.547904574  | 1.979098537  | -0.563580041 |
| H | 2.358167669  | 2.463445615  | 1.124007080  |
| H | 2.743589315  | 0.790326407  | 0.729785053  |
| C | 0.627379597  | -1.674597285 | 1.705997123  |
| H | 0.291312346  | -2.667735280 | 2.003683144  |
| H | 1.283221734  | -1.281098405 | 2.486766181  |
| H | -0.241947318 | -1.032805043 | 1.623593118  |

## 25

|   |              |              |              |
|---|--------------|--------------|--------------|
| H | -2.229241311 | -3.235495197 | -0.135227962 |
| H | 2.691340099  | -0.533349103 | 1.587068161  |
| H | 2.471534052  | -2.063274207 | 0.723748098  |
| H | 2.012469111  | 2.519339131  | -0.462091985 |
| H | -0.547035060 | 3.213819234  | -0.909756018 |
| H | -3.041625296 | 0.353577077  | -0.715443005 |
| H | -3.564215331 | 0.609058105  | 0.832949110  |
| H | 1.001449968  | -0.863642094 | -0.928783020 |
| H | 1.100481018  | 1.332953066  | 1.190504133  |
| H | -0.616283110 | 1.060217080  | -1.306852049 |
| H | -1.396401164 | 0.974053091  | 1.642592163  |
| H | -1.773627240 | -1.425313075 | 1.370978145  |
| C | -1.523295254 | -2.774381176 | -0.831283011 |
| O | -1.523073222 | -1.350179076 | -0.675506003 |
| O | 3.529635154  | -0.680574130 | -0.321307976 |
| C | 2.494384074  | -0.979689130 | 0.604579091  |
| O | 1.893531084  | 1.595589069  | -0.713013002 |
| O | -0.762884084 | 2.742480202  | -0.096936959 |
| N | -2.858929275 | 0.877873110  | 0.145331058  |
| O | 0.154046902  | -1.145253097 | 0.954663116  |
| C | 1.128149987  | -0.522229070 | 0.103573055  |
| C | 0.940531003  | 0.995761042  | 0.160470059  |
| C | -0.481584093 | 1.357644101  | -0.262534971 |
| C | -1.186142189 | -0.905973051 | 0.607093090  |
| H | 3.441288165  | 0.254861939  | -0.556169993 |

|   |              |              |              |
|---|--------------|--------------|--------------|
| H | -1.833273279 | -2.972627187 | -1.853868085 |
| H | -0.524744188 | -3.180693226 | -0.663192001 |
| C | -1.463425177 | 0.601450066  | 0.622580092  |
| H | -2.961368259 | 1.879403184  | -0.043830956 |

## 26

|   |              |              |              |
|---|--------------|--------------|--------------|
| N | -0.890212063 | -0.120847009 | -0.372814027 |
| N | -1.844886132 | -2.000658145 | 0.396515028  |
| N | -4.890062351 | 0.058975004  | -0.064941005 |
| N | -2.890598210 | 1.240855089  | -0.684372051 |
| N | -4.898635350 | -2.113662152 | 0.747588052  |
| C | 0.131618009  | 0.827408058  | -0.825860061 |
| C | 0.362579026  | 1.958134143  | 0.181701013  |
| C | 1.539182113  | 1.408756103  | 1.007026072  |
| C | 2.343354167  | 0.651164046  | -0.051404004 |
| C | -0.720151053 | -1.410619104 | 0.074642005  |
| C | -2.815284201 | -1.050709077 | 0.146559010  |
| C | -2.241916159 | 0.123416009  | -0.336646024 |
| C | -4.217028304 | -1.053084078 | 0.280845020  |
| C | -4.205481302 | 1.115943080  | -0.517501037 |
| O | 0.754578055  | 3.111634224  | -0.540270037 |
| O | 2.341754168  | 2.426288175  | 1.578480112  |
| O | 1.355387096  | 0.141105010  | -0.969702068 |
| H | -0.193921014 | 1.230957088  | -1.785448129 |
| H | 1.374034101  | 3.599785260  | 0.022518002  |
| H | -0.527903038 | 2.151731153  | 0.783649058  |
| H | 1.987075144  | 2.662762189  | 2.443748177  |
| H | 1.168301084  | 0.721038054  | 1.771198126  |
| H | 2.978815217  | 1.368093097  | -0.581066042 |
| H | -4.422812318 | -2.973506214 | 0.957038068  |
| H | -5.903556424 | -2.090565153 | 0.774086057  |
| H | 0.258635018  | -1.855633135 | 0.122335009  |
| H | -4.804520346 | 1.981261142  | -0.781037055 |
| C | 3.183156228  | -0.474344034 | 0.509831037  |
| H | 3.866900278  | -0.048069003 | 1.246906088  |
| H | 2.547824181  | -1.207205089 | 1.010653074  |
| S | 4.166230299  | -1.303830092 | -0.785435057 |
| C | 5.167937372  | -2.385312171 | 0.274627020  |
| H | 5.779541408  | -1.797716129 | 0.959233069  |
| H | 4.533167328  | -3.068006222 | 0.839308058  |
| H | 5.817933429  | -2.963011211 | -0.380974028 |

## 27

|   |              |             |              |
|---|--------------|-------------|--------------|
| H | -0.630840030 | 1.023541075 | -1.907079096 |
| C | -1.322221076 | 2.429771183 | 1.064358120  |
| H | -0.377810006 | 2.619059192 | 1.578843154  |

|   |              |              |              |
|---|--------------|--------------|--------------|
| H | -1.943510113 | 3.316026248  | 1.174174125  |
| H | -1.819702116 | 1.583674124  | 1.523950153  |
| C | -1.043005056 | 2.243328168  | -0.407580987 |
| H | -0.179072012 | -1.578984111 | 1.249236135  |
| H | -0.594771039 | -0.992590069 | -1.127465036 |
| H | -3.647494262 | -2.185744142 | 0.342968067  |
| H | -0.233434008 | 0.108722009  | 1.683209163  |
| O | -0.970338044 | 3.222468234  | -1.151200038 |
| C | -2.390067167 | -0.692912040 | -0.007091958 |
| C | -0.928148060 | -0.324172019 | -0.334014981 |
| N | -0.814715043 | 1.002949074  | -0.915331022 |
| C | 0.012099007  | -0.574113039 | 0.873265103  |
| O | -3.244654223 | 0.169670028  | 0.174430055  |
| N | -2.690925193 | -2.006302132 | 0.073830048  |
| C | 1.465968112  | -0.444098039 | 0.493857078  |
| C | 2.109158155  | -1.479858115 | -0.188156971 |
| C | 2.189413172  | 0.712471040  | 0.782343101  |
| C | 3.438556251  | -1.361217116 | -0.576254000 |
| H | 1.565908109  | -2.390453181 | -0.413585987 |
| C | 3.521161264  | 0.836289044  | 0.396925071  |
| H | 1.712246140  | 1.523451102  | 1.317936137  |
| C | 4.149396308  | -0.199561034 | -0.286041978 |
| H | 3.921025278  | -2.176306176 | -1.101043036 |
| H | 4.066378309  | 1.742057108  | 0.631198088  |
| H | 5.185279379  | -0.105503032 | -0.586313998 |
| C | -1.845120140 | -3.170168218 | -0.147559968 |
| H | -1.109614083 | -2.981606209 | -0.926605027 |
| H | -1.324111101 | -3.480087245 | 0.760912094  |
| H | -2.474203190 | -3.993450276 | -0.479953992 |

## 28

|   |              |              |              |
|---|--------------|--------------|--------------|
| H | -1.226546184 | -0.429604217 | -1.903117082 |
| C | -2.282675317 | 0.084957707  | 1.235621145  |
| H | -2.125603418 | 1.155095799  | 1.374563151  |
| H | -3.252046353 | -0.187847417 | 1.644465170  |
| H | -1.497027202 | -0.450628247 | 1.763041182  |
| C | -2.281415277 | -0.249457317 | -0.236260963 |
| H | 0.812269895  | 0.208134048  | -1.407321049 |
| H | 2.413407281  | -2.304799964 | 0.640386102  |
| O | -3.321358318 | -0.565669450 | -0.816397006 |
| C | 0.790492050  | -1.274292064 | 0.155848066  |
| C | 0.253298874  | 0.023357974  | -0.489944981 |
| N | -1.122707203 | -0.150072185 | -0.938822015 |
| O | 0.024807084  | -2.085399203 | 0.670967102  |
| N | 2.123436167  | -1.472441934 | 0.148135065  |
| C | 0.485430764  | 1.210510087  | 0.438441086  |



|   |              |              |              |
|---|--------------|--------------|--------------|
| C | 1.506231722  | 2.264041272  | 0.090706061  |
| C | 0.041232585  | 2.578441134  | 0.002025054  |
| H | 0.381688780  | 0.992880058  | 1.492955162  |
| H | 2.052844774  | 2.154456320  | -0.836484003 |
| H | 2.081403719  | 2.691520364  | 0.900968119  |
| H | -0.399095516 | 3.226881133  | 0.747450106  |
| H | -0.397915455 | 2.660445096  | -0.983640015 |
| C | 3.177188157  | -0.621926759 | -0.386450974 |
| H | 2.905746094  | -0.224000759 | -1.362899042 |
| H | 3.408889082  | 0.209265326  | 0.280109075  |
| H | 4.070590285  | -1.229441704 | -0.512135983 |

### Ado-H

|   |              |              |              |
|---|--------------|--------------|--------------|
| N | -0.220422015 | -0.292878997 | -0.430681046 |
| N | -1.654634073 | -1.892738154 | 0.217838001  |
| N | -3.993743323 | 0.977957985  | 0.091850992  |
| N | -1.753043182 | 1.603625096  | -0.513634052 |
| N | -4.606809306 | -1.175437192 | 0.697718033  |
| C | 1.023549055  | 0.372399087  | -0.823467074 |
| C | 1.679056080  | 1.127635161  | 0.339830009  |
| C | 2.696975186  | 0.094401116  | 0.853457046  |
| C | 3.130463234  | -0.601832920 | -0.435681046 |
| C | 3.642890314  | -2.012903010 | -0.272420034 |
| C | -0.415223990 | -1.614585098 | -0.104125022 |
| C | -2.318455155 | -0.687542087 | 0.100790992  |
| C | -1.443735122 | 0.319043011  | -0.302677037 |
| C | -3.659531261 | -0.308083100 | 0.301026007  |
| C | -3.044911281 | 1.838838075  | -0.294663037 |
| O | 2.343179094  | 2.261455262  | -0.190728029 |
| O | 3.822966247  | 0.688795195  | 1.478639092  |
| O | 1.941671148  | -0.605757955 | -1.258693104 |
| H | 0.778266018  | 1.063088131  | -1.631483135 |
| H | 3.140291146  | 2.394522294  | 0.344092010  |
| H | 0.944839019  | 1.419774161  | 1.094549063  |
| H | 3.633037229  | 0.823786194  | 2.414572159  |
| H | 2.203784170  | -0.615200948 | 1.522969096  |
| H | 3.887681269  | 0.023189147  | -0.920551080 |
| H | 2.895460280  | -2.645488076 | 0.209421000  |
| H | 4.541528376  | -2.002548980 | 0.346513010  |
| H | -4.390203262 | -2.149306251 | 0.816500043  |
| H | -5.560597390 | -0.869950194 | 0.786771039  |
| H | 0.396121089  | -2.320796124 | -0.143420025 |
| H | -3.376868334 | 2.860371135  | -0.447631047 |
| H | 3.898229344  | -2.445303032 | -1.240114103 |

Cartesian Coordinates of all the transition states between substrates and CH<sub>3</sub> radical.

**1A-TS-CH<sub>3</sub>**

|   |              |              |              |
|---|--------------|--------------|--------------|
| H | -7.414761550 | 0.446216032  | -0.151757011 |
| H | -4.533381327 | -1.418143104 | -0.647372046 |
| H | -4.259147304 | 0.058845004  | -1.530106109 |
| H | -2.880766208 | 0.949477067  | 0.387781028  |
| H | -3.149628224 | -0.540359039 | 1.266141094  |
| H | -2.001396146 | -1.823908133 | -0.560540039 |
| H | -1.731164126 | -0.329511024 | -1.436660101 |
| H | -0.369171026 | 0.541333038  | 0.472953034  |
| H | -0.628807048 | -0.954633069 | 1.345421096  |
| H | 0.511578037  | -2.236418161 | -0.459380033 |
| H | 0.781730054  | -0.761213053 | -1.368216099 |
| H | 1.247794090  | 1.697715123  | -0.853287064 |
| H | 2.690547196  | 0.967610072  | -1.663642120 |
| H | 2.947633214  | 2.492221178  | -0.532030038 |
| H | 3.132405225  | -2.650944190 | -0.251416018 |
| H | 1.837865130  | -1.303929096 | 1.439393106  |
| H | 2.137048156  | 1.001021069  | 1.365659099  |
| H | 4.637859331  | 0.959311070  | 0.585134044  |
| O | -5.571554375 | 0.879569065  | 1.161965086  |
| O | -6.661457468 | 0.035075003  | -0.606447044 |
| C | -5.549281411 | 0.259725019  | 0.124580009  |
| C | -4.332376312 | -0.350354025 | -0.517951037 |
| C | -3.042939217 | -0.124210009 | 0.260817019  |
| C | -1.832638134 | -0.749287055 | -0.429786031 |
| C | -0.531159039 | -0.532822037 | 0.339344024  |
| C | 0.677214050  | -1.159413086 | -0.355699026 |
| C | 2.274929162  | 1.360706100  | -0.737912051 |
| O | 5.424700386  | -1.421149101 | -0.097304007 |
| C | 4.290258307  | -0.997495071 | 0.096924007  |
| N | 3.115175224  | -1.644704120 | -0.197335014 |
| C | 1.975408140  | -0.954019070 | 0.407898029  |
| C | 2.529470182  | 0.503911036  | 0.478339035  |
| N | 3.959505286  | 0.216432016  | 0.651370049  |
| C | 3.646703264  | 3.636069262  | -0.267635019 |
| H | 4.631607335  | 3.466745248  | -0.693121049 |
| H | 3.641882263  | 3.715893268  | 0.815762057  |
| H | 3.080469224  | 4.415759317  | -0.768172057 |

**1B-TS-CH<sub>3</sub>**

|   |              |              |              |
|---|--------------|--------------|--------------|
| H | -4.596781328 | -1.431678104 | -0.634192045 |
| H | -4.315604309 | 0.031298002  | -1.540366110 |
| H | -2.943116210 | 0.944568070  | 0.357816026  |
| H | -3.203493229 | -0.531745039 | 1.253667089  |

|   |              |              |              |
|---|--------------|--------------|--------------|
| H | -2.058510146 | -1.837816134 | -0.561231039 |
| H | -1.789596127 | -0.352745025 | -1.452110103 |
| H | -0.429239031 | 0.538702037  | 0.449738032  |
| H | -0.688455050 | -0.948021068 | 1.337004098  |
| H | 0.458432033  | -2.246545164 | -0.453043033 |
| H | 0.731756053  | -0.778885055 | -1.373005100 |
| H | 1.194757088  | 1.684445120  | -0.876804060 |
| H | 2.643866190  | 0.948945070  | -1.670772122 |
| H | 2.892132210  | 2.483302176  | -0.550881041 |
| H | 3.081116223  | -2.655136189 | -0.229238016 |
| H | 1.774009126  | -1.297813093 | 1.444229103  |
| H | 2.067951149  | 1.007265070  | 1.353980098  |
| H | 4.574704329  | 0.963255070  | 0.592675042  |
| O | -5.542928373 | 1.111059081  | 1.015313073  |
| O | -6.770217469 | -0.090280007 | -0.426881031 |
| C | -5.679157383 | 0.276451020  | 0.085620006  |
| C | -4.407943316 | -0.359759026 | -0.520102038 |
| C | -3.107143224 | -0.129826009 | 0.239839017  |
| C | -1.892663138 | -0.760975056 | -0.439863031 |
| C | -0.590026044 | -0.537113040 | 0.326153024  |
| C | 0.622475045  | -1.168408083 | -0.357502026 |
| C | 2.221436158  | 1.349737097  | -0.751430053 |
| O | 5.370522373  | -1.420648103 | -0.066441005 |
| C | 4.233786305  | -0.997628070 | 0.116490008  |
| N | 3.062044220  | -1.648613121 | -0.181751013 |
| C | 1.916626136  | -0.955574068 | 0.410801030  |
| C | 2.467936176  | 0.503531036  | 0.473831034  |
| N | 3.897188283  | 0.219712016  | 0.660069046  |
| C | 3.589718256  | 3.629487260  | -0.292069021 |
| H | 4.580125332  | 3.453217249  | -0.701717052 |
| H | 3.570224255  | 3.723638270  | 0.790012059  |
| H | 3.031815218  | 4.403466317  | -0.810517059 |

### 2A-TS-CH<sub>3</sub>

|   |              |              |              |
|---|--------------|--------------|--------------|
| O | 3.552166256  | -2.348103168 | -0.559899042 |
| P | 2.215105161  | -1.621900116 | -0.140336010 |
| O | 2.614324188  | -0.072801005 | -0.155911011 |
| O | 1.354342098  | -1.863301135 | -1.441200103 |
| O | 1.608754115  | -2.044310145 | 1.135470080  |
| C | 1.779309128  | 0.913332065  | 0.430101031  |
| C | 0.745516053  | 1.427623103  | -0.528844038 |
| C | -0.149038011 | 2.520554180  | 0.052618004  |
| O | -0.154378011 | 0.330815024  | -0.904104066 |
| C | -1.508773106 | 0.678939051  | -0.612984045 |
| C | -1.408688099 | 1.746632125  | 0.479060034  |
| N | -2.270106161 | -0.490953035 | -0.284208020 |

|   |              |              |              |
|---|--------------|--------------|--------------|
| O | -0.456483033 | 3.447265249  | -0.977511068 |
| O | -2.580572183 | 2.539161185  | 0.465860033  |
| C | -2.156992154 | -1.336893097 | 0.813823057  |
| C | -3.182309227 | -2.235569160 | 0.680527049  |
| N | -3.917272284 | -1.970570142 | -0.459929033 |
| C | -3.342884243 | -0.939067066 | -1.016637074 |
| N | -1.198339084 | -1.142762085 | 1.808393132  |
| H | 4.090711292  | -2.628734187 | 0.192635014  |
| H | 0.626048045  | -1.204097088 | -1.485097108 |
| H | 1.399270098  | 0.601186043  | 1.401861098  |
| H | 2.600579190  | 1.926540140  | 0.675396051  |
| H | 1.227139090  | 1.779350128  | -1.441649105 |
| H | 0.323559023  | 3.024697218  | 0.900210062  |
| H | -1.976716144 | 1.120216080  | -1.496189107 |
| H | -1.251559091 | 1.267543091  | 1.444791105  |
| H | -1.306221095 | 3.851865278  | -0.747895054 |
| H | -2.741688198 | 2.882903206  | 1.351912095  |
| H | -3.422976246 | -3.050070219 | 1.344521097  |
| H | -3.632571262 | -0.460964033 | -1.939074142 |
| H | -0.249226018 | -1.371825098 | 1.514944107  |
| H | -1.419224102 | -1.692528123 | 2.628104191  |
| C | 3.502557254  | 2.930611212  | 0.878469064  |
| H | 4.452256322  | 2.409264172  | 0.944196069  |
| H | 3.178418229  | 3.392879242  | 1.805606131  |
| H | 3.398248243  | 3.563499259  | 0.002524000  |

### 2B-TS-CH<sub>3</sub>

|   |              |              |              |
|---|--------------|--------------|--------------|
| O | 3.992970285  | -0.831977059 | 0.882306065  |
| P | 2.882354205  | -1.344508096 | -0.199005014 |
| O | 2.274218165  | 0.069462005  | -0.771088057 |
| O | 3.608009257  | -1.956577140 | -1.340616097 |
| O | 1.798637131  | -2.063891148 | 0.543055039  |
| C | 1.495611108  | 0.889205065  | 0.047035003  |
| C | 0.321557023  | 1.449927104  | -0.704811051 |
| C | -0.534108038 | 2.399259172  | 0.133108010  |
| O | -0.559710041 | 0.364829026  | -1.120403081 |
| C | -1.858416136 | 0.567507039  | -0.592832044 |
| C | -1.668295117 | 1.484328107  | 0.618187042  |
| N | -2.491430180 | -0.696100053 | -0.316860023 |
| O | -1.046955073 | 3.424379248  | -0.709365050 |
| O | -2.876892207 | 2.174634156  | 0.886418063  |
| C | -2.103896149 | -1.687218120 | 0.572918040  |
| C | -3.094942222 | -2.634589189 | 0.509076037  |
| N | -4.073336291 | -2.253873162 | -0.390858028 |
| C | -3.678455264 | -1.105188082 | -0.872383065 |
| N | -0.968501069 | -1.573297112 | 1.369090099  |

|   |              |              |              |
|---|--------------|--------------|--------------|
| H | 3.619571261  | -0.798819056 | 1.771189125  |
| H | 1.216562086  | 0.416026030  | 0.989917073  |
| H | 2.223477158  | 1.914574140  | 0.389039028  |
| H | 0.670660047  | 1.957229139  | -1.606346115 |
| H | 0.028392002  | 2.831649203  | 0.965135068  |
| H | -2.498922182 | 1.077872079  | -1.319542095 |
| H | -1.339731096 | 0.895448065  | 1.474428106  |
| H | -1.881272138 | 3.719096267  | -0.315427023 |
| H | -2.904571209 | 2.412387175  | 1.820133131  |
| H | -3.147936228 | -3.559110258 | 1.061297078  |
| H | -4.182608303 | -0.513591037 | -1.620028114 |
| H | -0.079488006 | -1.581017115 | 0.863171063  |
| H | -0.941777068 | -2.313368169 | 2.057790147  |
| C | 3.050457217  | 3.015600216  | 0.713702049  |
| H | 4.051479292  | 2.632121191  | 0.543544041  |
| H | 2.821131202  | 3.226789231  | 1.753632124  |
| H | 2.743294198  | 3.793381275  | 0.021086002  |

### 2C-TS-CH<sub>3</sub>

|   |              |              |              |
|---|--------------|--------------|--------------|
| O | 3.865436277  | -0.876108065 | 0.999088070  |
| P | 2.927778209  | -1.356631097 | -0.095760007 |
| O | 2.270897165  | 0.068429005  | -0.779969058 |
| O | 3.591346259  | -1.991898144 | -1.301046096 |
| O | 1.702501124  | -2.107208153 | 0.428770031  |
| C | 1.509903106  | 0.891754064  | 0.017697001  |
| C | 0.341357025  | 1.481161108  | -0.731372055 |
| C | -0.513137037 | 2.415098172  | 0.120658009  |
| O | -0.556616042 | 0.421791030  | -1.184319083 |
| C | -1.832300133 | 0.575717044  | -0.594797043 |
| C | -1.622734115 | 1.481133104  | 0.621635045  |
| N | -2.423696175 | -0.709110050 | -0.311185022 |
| O | -1.060336076 | 3.437480248  | -0.707113051 |
| O | -2.835506202 | 2.151867157  | 0.928903069  |
| C | -2.010385142 | -1.688049119 | 0.583336043  |
| C | -2.975413215 | -2.663411193 | 0.513310037  |
| N | -3.959593282 | -2.313670165 | -0.392613028 |
| C | -3.594684256 | -1.153951082 | -0.872384065 |
| N | -0.884631063 | -1.545180110 | 1.386104100  |
| H | 1.211449085  | 0.430271031  | 0.962838068  |
| H | 2.207964157  | 1.905590139  | 0.373503027  |
| H | 0.700055049  | 2.003106145  | -1.621015115 |
| H | 0.057425004  | 2.853887205  | 0.943566068  |
| H | -2.519478183 | 1.076160079  | -1.285343095 |
| H | -1.266189090 | 0.886881066  | 1.462236105  |
| H | -1.892402137 | 3.713502266  | -0.295561021 |
| H | -2.838764203 | 2.381830174  | 1.864919132  |

|   |              |              |              |
|---|--------------|--------------|--------------|
| H | -3.005346217 | -3.587721257 | 1.067998076  |
| H | -4.111908296 | -0.578360041 | -1.623746119 |
| H | 0.024282002  | -1.597149115 | 0.892409064  |
| H | -0.879347064 | -2.259364165 | 2.102858152  |
| C | 3.021297217  | 3.068103220  | 0.733875053  |
| H | 2.738078198  | 3.290758236  | 1.758080129  |
| H | 2.732939199  | 3.828112273  | 0.013864001  |
| H | 4.034813288  | 2.697523192  | 0.617376047  |

### 3-TS-CH<sub>3</sub>

|   |              |              |              |
|---|--------------|--------------|--------------|
| H | 3.617572000  | -2.076604000 | 0.040087000  |
| H | -5.810838000 | 0.428558000  | 0.117043000  |
| H | -2.466748000 | 0.437347000  | 1.544535000  |
| H | -2.349739000 | 1.521573000  | 0.185980000  |
| H | -1.369086000 | -0.327909000 | -1.207456000 |
| H | -1.481995000 | -1.412989000 | 0.158353000  |
| H | 0.054477000  | 0.078042000  | 1.470948000  |
| H | 0.164598000  | 1.165326000  | 0.101430000  |
| H | 1.155412000  | -0.687960000 | -1.278400000 |
| H | 1.048383000  | -1.762178000 | 0.100355000  |
| H | 2.586410000  | -0.081574000 | 1.367187000  |
| H | 2.679982000  | 0.971509000  | -0.191205000 |
| O | -4.019469000 | -0.929555000 | -0.784670000 |
| C | 5.073631000  | -0.506168000 | 0.298740000  |
| C | 3.735216000  | -1.018577000 | -0.231249000 |
| C | -3.855667000 | 0.023639000  | -0.021456000 |
| C | -2.481917000 | 0.467073000  | 0.449915000  |
| C | -1.337907000 | -0.364541000 | -0.115363000 |
| C | 0.026520000  | 0.114487000  | 0.376043000  |
| C | 1.186739000  | -0.708880000 | -0.182391000 |
| C | 2.545695000  | -0.241408000 | 0.286044000  |
| H | 3.734258000  | -0.990524000 | -1.326767000 |
| H | 5.907461000  | -1.092258000 | -0.092637000 |
| H | 5.233975000  | 0.536325000  | 0.015671000  |
| H | 5.107146000  | -0.562433000 | 1.389736000  |
| C | 2.793209000  | 2.231878000  | -0.798291000 |
| H | 2.714084000  | 2.937912000  | 0.022979000  |
| H | 3.767201000  | 2.220365000  | -1.278030000 |
| H | 1.959550000  | 2.269168000  | -1.493200000 |
| N | -4.907494000 | 0.735028000  | 0.444330000  |
| C | -4.855689000 | 1.882478000  | 1.336803000  |
| H | -4.390579000 | 1.630140000  | 2.291498000  |
| H | -4.308049000 | 2.716420000  | 0.893085000  |
| H | -5.874156000 | 2.209625000  | 1.531553000  |

### 4-TS-CH<sub>3</sub>

|   |              |              |              |
|---|--------------|--------------|--------------|
| C | -0.540137208 | 2.885428148  | 0.626624065  |
| C | -3.002030138 | -1.320075220 | -0.134131344 |
| C | -1.750520060 | -0.517334266 | 0.130437733  |
| O | -1.372777877 | -0.259498831 | 1.266969346  |
| N | -1.050900126 | -0.115293653 | -0.970536491 |
| C | 0.083851501  | 0.747411285  | -0.909480978 |
| C | 1.388401639  | 0.227998795  | -0.368223046 |
| O | 2.343121853  | 0.999926297  | -0.249506509 |
| N | 1.455678155  | -1.071694453 | -0.035586200 |
| C | 2.657435443  | -1.666030551 | 0.520556121  |
| H | -2.888056461 | -2.301706177 | 0.327301160  |
| H | -0.193100238 | 1.746427419  | -0.145804498 |
| H | 0.250388690  | 1.232599686  | -1.866955639 |
| H | -1.462355017 | -0.282501960 | -1.874916825 |
| H | 3.494380053  | -1.578386575 | -0.174352250 |
| H | 0.643392697  | -1.648558706 | -0.171183602 |
| H | -0.137499447 | 3.714073587  | 0.053980493  |
| H | -1.622555327 | 2.830016702  | 0.660947623  |
| H | 2.467439464  | -2.718460926 | 0.716286588  |
| H | 2.936903537  | -1.174447345 | 1.454099825  |
| H | -3.224578487 | -1.448209532 | -1.192190330 |
| H | -3.840891893 | -0.821045813 | 0.351717423  |
| H | -0.041672655 | 2.691307486  | 1.569530894  |

### 5-TS-CH<sub>3</sub>

|   |              |              |              |
|---|--------------|--------------|--------------|
| C | 3.069091056  | -1.696971042 | -1.351360385 |
| N | 2.098819794  | -1.446437683 | -0.583263635 |
| C | 1.725792750  | -0.048711955 | -0.382127879 |
| C | 1.969867072  | 0.426952680  | 1.088748799  |
| O | 2.294136571  | -0.424405767 | 1.945938793  |
| C | 0.268059573  | 0.113225277  | -0.792473385 |
| C | -0.778640940 | -0.362002722 | 0.188680783  |
| C | -2.200101033 | -0.204697969 | -0.353535815 |
| C | -3.228197758 | -0.695320781 | 0.648370233  |
| N | -4.628120306 | -0.536415738 | 0.107294688  |
| O | 1.810675119  | 1.658582667  | 1.265632644  |
| H | 3.651660427  | -0.919163540 | -1.861662236 |
| H | 2.337401526  | 0.607391906  | -1.018881421 |
| H | 0.102861135  | -0.278979764 | -1.798688445 |
| H | -0.595435786 | -1.415047941 | 0.433699106  |
| H | -0.679812596 | 0.195214620  | 1.125024010  |
| H | -2.301119748 | -0.766709337 | -1.286505596 |
| H | -2.388803270 | 0.846376411  | -0.587192210 |
| H | -3.104468127 | -1.752549179 | 0.874469553  |
| H | -3.191870211 | -0.130516360 | 1.577719076  |
| H | -5.328241640 | -0.868010632 | 0.772454054  |

|   |              |              |              |
|---|--------------|--------------|--------------|
| H | -4.837911361 | 0.442337883  | -0.097423428 |
| H | -4.753168229 | -1.063786555 | -0.758827729 |
| H | 0.051594726  | 1.397565566  | -0.984807338 |
| H | 3.363382368  | -2.729949215 | -1.530632207 |
| C | -0.250201552 | 2.719068654  | -1.260756890 |
| H | -0.958967226 | 2.686479035  | -2.083181373 |
| H | 0.710576940  | 3.152803775  | -1.519050692 |
| H | -0.665083894 | 3.093849201  | -0.330574784 |

### 6A-TS-CH<sub>3</sub>

|   |              |              |              |
|---|--------------|--------------|--------------|
| C | 2.479880807  | -2.213672932 | -0.765626307 |
| N | 1.806464620  | -1.506293377 | 0.035754422  |
| C | 1.306047567  | -0.227868577 | -0.458875498 |
| C | 1.710948735  | 0.933050136  | 0.439220557  |
| O | 1.942897554  | 0.592802510  | 1.715094299  |
| C | -0.217409281 | -0.288958665 | -0.587096757 |
| C | -1.036854788 | -0.345581177 | 0.676198024  |
| O | 1.787345737  | 2.070904159  | 0.039288711  |
| H | 2.727018865  | -1.903620256 | -1.787491039 |
| H | 1.720987042  | 0.014409837  | -1.445768252 |
| H | -0.502117408 | -1.057828263 | -1.302415088 |
| H | -0.732540071 | -1.214850091 | 1.273029415  |
| H | -0.860797290 | 0.532989082  | 1.299780479  |
| H | -0.577983600 | 0.809573679  | -1.209482239 |
| H | 2.840362228  | -3.187722657 | -0.442187329 |
| C | -2.558778341 | -0.484458009 | 0.428689369  |
| O | -2.918507473 | -1.211043719 | -0.530929551 |
| O | -3.311783035 | 0.121184530  | 1.232416289  |
| H | 2.158660994  | 1.403632059  | 2.205805188  |
| C | -1.029458780 | 1.962257207  | -1.836700586 |
| H | -0.258138627 | 2.190746793  | -2.565374853 |
| H | -1.982727709 | 1.672718320  | -2.267754307 |
| H | -1.103854486 | 2.684617358  | -1.030233670 |

### 6B-TS-CH<sub>3</sub>

|   |              |              |              |
|---|--------------|--------------|--------------|
| C | 2.465001031  | -2.277495635 | -0.755530775 |
| N | 1.666084342  | -1.619414226 | -0.030483646 |
| C | 1.334771822  | -0.256143220 | -0.441614657 |
| C | 1.853915976  | 0.752196640  | 0.644467784  |
| O | 1.361461453  | 0.670233001  | 1.793125258  |
| C | -0.160570471 | -0.138474069 | -0.692455805 |
| C | -1.090298177 | -0.522645760 | 0.429919178  |
| O | 2.725520214  | 1.562006972  | 0.248708411  |
| H | 2.912872630  | -1.880708252 | -1.674775311 |
| H | 1.850642755  | -0.002066888 | -1.375271979 |
| H | -0.445025747 | -0.592445289 | -1.641739791 |



|   |              |              |              |
|---|--------------|--------------|--------------|
| H | -0.923549467 | -1.561410558 | 0.738024141  |
| H | -0.887363967 | 0.072542342  | 1.320996787  |
| H | -0.374483373 | 1.140222992  | -0.915105650 |
| H | 2.735432323  | -3.293058654 | -0.471339004 |
| C | -2.545494505 | -0.398981338 | 0.076079555  |
| O | -3.002830455 | -0.155950000 | -1.016886301 |
| O | -3.334727568 | -0.610365909 | 1.152589954  |
| H | -4.260552291 | -0.539106271 | 0.868456353  |
| C | -0.587967137 | 2.504113410  | -1.060373500 |
| H | 0.372955492  | 2.936484847  | -0.801012406 |
| H | -0.870876254 | 2.625816081  | -2.101481418 |
| H | -1.384182885 | 2.726816544  | -0.356615396 |

### 6C-TS-CH<sub>3</sub>

|   |              |              |              |
|---|--------------|--------------|--------------|
| C | 2.381217413  | -2.242914161 | -0.813298166 |
| N | 1.691456354  | -1.550779519 | -0.013251581 |
| C | 1.277442759  | -0.214244321 | -0.448574537 |
| C | 1.784495879  | 0.829211970  | 0.547381544  |
| O | 3.083928260  | 0.644791519  | 0.828243459  |
| C | -0.225288147 | -0.178659105 | -0.643037545 |
| C | -1.079817297 | -0.408229245 | 0.577764801  |
| O | 1.135495105  | 1.739679684  | 0.999573886  |
| H | 2.708024889  | -1.886160328 | -1.795970067 |
| H | 1.754257353  | 0.055519039  | -1.403678330 |
| H | -0.513152181 | -0.811431419 | -1.479744750 |
| H | -0.817307541 | -1.353117931 | 1.067830396  |
| H | -0.921292368 | 0.368312194  | 1.327495063  |
| H | -0.519031229 | 1.024828839  | -1.105816247 |
| H | 2.674079613  | -3.250295560 | -0.526405057 |
| C | -2.551944673 | -0.470039488 | 0.268638258  |
| O | -3.049018384 | -0.480725538 | -0.832560032 |
| O | -3.287537758 | -0.528432873 | 1.397144378  |
| H | -4.224868223 | -0.584512711 | 1.149124864  |
| H | 3.370562959  | 1.347206519  | 1.435153904  |
| C | -0.859283827 | 2.259300912  | -1.596957235 |
| H | 0.093854284  | 2.735683714  | -1.803199771 |
| H | -1.454419020 | 2.044786283  | -2.478898787 |
| H | -1.414773447 | 2.715576312  | -0.783846372 |

### 6D-TS-CH<sub>3</sub>

|   |              |              |              |
|---|--------------|--------------|--------------|
| C | 2.679900340  | -2.031729623 | -0.780080503 |
| N | 1.875194484  | -1.453018827 | 0.002675563  |
| C | 1.334605348  | -0.158887611 | -0.407282934 |
| C | 1.728602004  | 0.989418721  | 0.576595700  |
| O | 2.072881615  | 0.693496146  | 1.743198966  |
| C | -0.179149948 | -0.294538321 | -0.539653265 |

|   |              |              |              |
|---|--------------|--------------|--------------|
| C | -1.003768605 | -0.355547571 | 0.723103089  |
| O | 1.646638322  | 2.141761596  | 0.084226941  |
| H | 3.002938915  | -1.604746073 | -1.738587102 |
| H | 1.736775575  | 0.126122776  | -1.390131705 |
| H | -0.442291994 | -1.094802888 | -1.231556127 |
| H | -0.677416428 | -1.214232187 | 1.324086092  |
| H | -0.840081355 | 0.535396706  | 1.331041693  |
| H | -0.609381512 | 0.753699335  | -1.193585749 |
| H | 3.088518434  | -3.005185886 | -0.512486556 |
| C | -2.516478124 | -0.529546292 | 0.461750068  |
| O | -2.854108057 | -1.435140907 | -0.343901740 |
| O | -3.296360011 | 0.234526942  | 1.087978835  |
| C | -1.206417440 | 1.807947920  | -1.888091576 |
| H | -0.470888335 | 2.093066854  | -2.633998654 |
| H | -2.116554810 | 1.381631165  | -2.299269696 |
| H | -1.374156262 | 2.560328439  | -1.124308573 |

### 7A-TS-CH<sub>3</sub>

|   |              |              |              |
|---|--------------|--------------|--------------|
| C | 0.916557067  | -0.846993061 | -0.375399027 |
| C | 0.527581038  | 0.484858035  | -0.301208022 |
| C | 1.498593107  | 1.481683105  | -0.066553005 |
| N | -0.017101001 | -1.808078129 | -0.572868044 |
| C | -1.416138099 | -1.492449105 | -0.796702056 |
| C | -1.755510127 | -0.180123013 | -0.092493006 |
| N | -0.827075057 | 0.845395062  | -0.452141033 |
| C | -3.192882231 | 0.198535014  | -0.230785017 |
| O | -3.395412244 | 1.521971110  | -0.092844007 |
| O | -4.094402293 | -0.597217045 | -0.373484027 |
| O | 1.290198095  | 2.699487196  | 0.047890003  |
| N | 4.409675318  | -0.702822048 | 0.163121012  |
| H | -1.647113121 | -0.438263032 | 1.090392079  |
| H | 3.524960254  | 1.669411120  | 0.226467016  |
| H | 0.293132021  | -2.764134198 | -0.614397043 |
| H | -2.034465146 | -2.290289167 | -0.390502028 |
| H | -1.637779116 | -1.402677100 | -1.865258133 |
| H | -1.027913074 | 1.758263124  | -0.065609005 |
| H | 4.643243334  | -1.649012121 | -0.090424006 |
| H | 5.141326372  | -0.023057002 | 0.035473003  |
| N | 2.206279156  | -1.259837090 | -0.246620018 |
| C | 3.114005224  | -0.340377024 | -0.034751003 |
| N | 2.807119202  | 0.982016071  | 0.045064003  |
| H | -4.350283311 | 1.694033124  | -0.130350009 |
| C | -1.294109096 | -0.847111062 | 2.601768187  |
| H | -1.428716103 | -1.920835138 | 2.559578182  |
| H | -2.045955146 | -0.282386020 | 3.139622223  |
| H | -0.274376020 | -0.489852035 | 2.673360191  |

**7B-TS-CH<sub>3</sub>**

|   |              |              |              |
|---|--------------|--------------|--------------|
| C | 0.876134064  | -0.848707061 | -0.375123027 |
| C | 0.501389036  | 0.490450035  | -0.308218022 |
| C | 1.485106109  | 1.474069107  | -0.078052005 |
| N | -0.065148005 | -1.797226127 | -0.590154042 |
| C | -1.476238104 | -1.475950104 | -0.777308054 |
| C | -1.798584128 | -0.150078011 | -0.104380008 |
| N | -0.845372059 | 0.843045060  | -0.477912035 |
| C | -3.250777233 | 0.325613024  | -0.223429016 |
| O | -3.437288247 | 1.564742115  | -0.129753009 |
| O | -4.123724295 | -0.568141041 | -0.345613025 |
| O | 1.301501093  | 2.699822197  | 0.019096001  |
| N | 4.372294317  | -0.746592055 | 0.197230014  |
| H | -1.675893118 | -0.389551028 | 1.091453080  |
| H | 3.512544253  | 1.635335117  | 0.231818017  |
| H | 0.238935017  | -2.755895199 | -0.616342045 |
| H | -2.083258152 | -2.261660164 | -0.332830024 |
| H | -1.724905124 | -1.423587100 | -1.843156130 |
| H | -1.087099078 | 1.773060126  | -0.164422012 |
| H | 4.590360329  | -1.694127122 | -0.066860005 |
| H | 5.107724368  | -0.079006006 | 0.028546002  |
| N | 2.162195157  | -1.277552092 | -0.233907017 |
| C | 3.078339222  | -0.369251026 | -0.020538001 |
| N | 2.787620201  | 0.956356070  | 0.047933003  |
| C | -1.367743099 | -0.749670052 | 2.599132186  |
| H | -1.578859114 | -1.812445133 | 2.632589190  |
| H | -2.067761148 | -0.112412008 | 3.127945224  |
| H | -0.322580023 | -0.476172034 | 2.686588194  |

**8A-TS-CH<sub>3</sub>**

|   |              |              |              |
|---|--------------|--------------|--------------|
| O | 2.653760223  | -1.552044168 | -2.045627183 |
| O | 4.411538424  | 1.692383022  | 0.292006985  |
| C | 1.176286178  | 1.104285056  | 0.502143000  |
| C | 0.502054131  | 1.185946081  | -0.889983098 |
| C | -0.976412967 | 1.464582133  | -0.768667092 |
| C | -4.140214241 | -0.389302924 | 0.138106973  |
| C | -2.315804146 | -1.964063082 | 0.224847980  |
| O | -1.419559977 | 2.583751226  | -0.966356107 |
| H | 5.482010441  | -0.100241132 | 0.794211023  |
| O | -5.940404359 | 1.145129232  | 0.055707968  |
| O | 5.186636417  | -0.930131183 | 0.390756992  |
| H | 2.879110280  | 0.329567961  | 1.703473085  |
| C | -1.889722061 | 0.343859076  | -0.369474063 |
| O | -6.407539439 | -0.976050910 | 0.613494008  |
| C | -3.251127151 | 0.616849129  | -0.224930053 |

|   |              |              |              |
|---|--------------|--------------|--------------|
| C | -3.666333237 | -1.685577030 | 0.363417990  |
| H | 3.437497251  | -2.566043262 | -0.414379066 |
| H | 3.234555325  | 1.167324011  | -1.335685134 |
| H | 4.878719405  | -0.564008151 | -1.631165152 |
| H | 4.914210471  | 2.201786050  | -0.354815062 |
| H | 1.923957151  | -2.181894198 | -2.094699186 |
| C | -5.596100315 | -0.133539870 | 0.298000985  |
| C | -1.428789061 | -0.957090028 | -0.140174047 |
| H | 1.391999219  | 2.108842125  | 0.869637027  |
| H | 0.940871180  | 1.991391129  | -1.476112144 |
| H | 0.501040118  | 0.643600039  | 1.226063050  |
| H | 0.667589120  | 0.248921008  | -1.423423140 |
| H | -3.602488155 | 1.622342207  | -0.401472065 |
| H | -4.365599304 | -2.460370069 | 0.645947009  |
| H | -1.949203145 | -2.966394162 | 0.401126992  |
| H | -0.378365989 | -1.195023069 | -0.235648054 |
| O | 2.202762202  | -1.059657121 | 0.190525977  |
| C | 3.602977342  | 0.746309972  | -0.395846065 |
| C | 4.333641364  | -0.579289139 | -0.684608085 |
| C | 3.168259259  | -1.559058180 | -0.737206091 |
| C | 2.450901251  | 0.299530969  | 0.490627999  |
| H | -6.899463403 | 1.227743257  | 0.180664977  |
| C | 3.268402307  | 0.261163947  | 3.082748184  |
| H | 3.635528358  | 1.258601011  | 3.299261199  |
| H | 4.029534343  | -0.511483127 | 3.069619186  |
| H | 2.352837235  | -0.009339051 | 3.599299222  |

### 8B-TS-CH<sub>3</sub>

|   |              |              |              |
|---|--------------|--------------|--------------|
| O | 2.673068265  | -1.618827041 | -1.999927139 |
| O | 4.360500263  | 1.720973257  | 0.255835025  |
| C | 1.135665056  | 1.068272095  | 0.477117040  |
| C | 0.463540005  | 1.109106073  | -0.915892061 |
| C | -1.012684115 | 1.418397041  | -0.803188054 |
| C | -4.226457279 | -0.341337204 | 0.141380016  |
| C | -2.419912092 | -1.954043254 | 0.243747024  |
| O | -1.420827181 | 2.549332109  | -1.023446067 |
| H | 5.469420415  | -0.031805825 | 0.797773063  |
| O | -6.043339441 | 1.192817839  | 0.051987010  |
| O | 5.194893418  | -0.878328895 | 0.414580036  |
| H | 2.853777205  | 0.365026107  | 1.697928128  |
| C | -1.947321142 | 0.329366928  | -0.387401022 |
| O | -6.473596423 | -0.927216327 | 0.654039055  |
| C | -3.306185250 | 0.627540901  | -0.240371011 |
| C | -3.766870199 | -1.638409282 | 0.382369034  |
| H | 3.480241358  | -2.572562080 | -0.343759018 |
| H | 3.196071201  | 1.133259172  | -1.359228092 |

|   |              |              |              |
|---|--------------|--------------|--------------|
| H | 4.874163384  | -0.570502886 | -1.614827112 |
| H | 4.853004280  | 2.224803313  | -0.402987023 |
| H | 1.942915233  | -2.249780114 | -2.025237142 |
| C | -5.713487387 | 0.006134766  | 0.295914027  |
| C | -1.508820060 | -0.977903152 | -0.139781004 |
| H | 1.328059034  | 2.084074175  | 0.827230064  |
| H | 0.915127008  | 1.887183143  | -1.529282106 |
| H | 0.467159024  | 0.604852035  | 1.205537090  |
| H | 0.616955049  | 0.151858009  | -1.414985096 |
| H | -3.653752312 | 1.632850958  | -0.428426025 |
| H | -4.483457221 | -2.391810362 | 0.680296058  |
| H | -2.076588026 | -2.963042316 | 0.435139038  |
| H | -0.464322976 | -1.240674132 | -0.235445011 |
| O | 2.212822211  | -1.079693020 | 0.223394022  |
| C | 3.571973244  | 0.742053159  | -0.409697024 |
| C | 4.331406346  | -0.574014908 | -0.666769044 |
| C | 3.187956300  | -1.580255020 | -0.691562045 |
| C | 2.428440175  | 0.292824086  | 0.486791041  |
| C | 3.237835235  | 0.346330120  | 3.082120225  |
| H | 3.517941215  | 1.373478206  | 3.289932243  |
| H | 4.061041318  | -0.359893901 | 3.085307227  |
| H | 2.343603182  | 0.005849062  | 3.594675266  |

### 9-TS-CH<sub>3</sub>

|   |              |              |              |
|---|--------------|--------------|--------------|
| H | -1.850423131 | -0.234819017 | 1.805995129  |
| C | -2.045642148 | -2.111338154 | -0.970391068 |
| H | -1.385976102 | -2.970095212 | -0.827586057 |
| H | -2.970245212 | -2.467155179 | -1.419246100 |
| H | -1.552256114 | -1.418119101 | -1.646660118 |
| C | -2.367669168 | -1.537588109 | 0.388614028  |
| H | 0.721988054  | -1.394830100 | -0.550963037 |
| H | -0.277872020 | 1.131624084  | 1.083824079  |
| H | -2.085803150 | 2.014041143  | -2.077604152 |
| H | 0.826341062  | -1.171180083 | 1.189970088  |
| O | -3.270398236 | -2.007694143 | 1.076658078  |
| C | -0.826770061 | 0.860587064  | -1.077701075 |
| C | -0.503251036 | 0.176394013  | 0.238260017  |
| N | -1.619227115 | -0.501740036 | 0.858565062  |
| C | 0.785167055  | -0.639516045 | 0.237174017  |
| O | -0.089610006 | 0.711957050  | -2.055699146 |
| N | -1.928238137 | 1.637952120  | -1.154453081 |
| C | 2.059158150  | 0.181872013  | 0.054142004  |
| H | 2.038451148  | 0.714205053  | -0.893952065 |
| H | 2.170748159  | 0.907782065  | 0.860023061  |
| S | 3.515022252  | -0.921202069 | 0.075226005  |
| C | 4.822114346  | 0.318457023  | -0.150037011 |

|   |              |              |              |
|---|--------------|--------------|--------------|
| H | 5.773532441  | -0.211585015 | -0.160530012 |
| H | 4.695611339  | 0.844874061  | -1.096111078 |
| H | 4.821081345  | 1.034532076  | 0.671891051  |
| C | -0.014157001 | 2.044679146  | 2.148908156  |
| H | 0.732726050  | 1.523852107  | 2.737721199  |
| H | -0.969087069 | 2.176535156  | 2.645895188  |
| H | 0.346927025  | 2.914447207  | 1.611068117  |
| C | -2.915552209 | 1.965218144  | -0.135937010 |
| H | -3.657498263 | 1.174595086  | -0.014248001 |
| H | -2.443615174 | 2.152563157  | 0.824149062  |
| H | -3.423063248 | 2.877795206  | -0.441896032 |

### 10A-TS-CH<sub>3</sub>

|   |              |              |              |
|---|--------------|--------------|--------------|
| C | 1.990641142  | 0.131866009  | 0.844552062  |
| C | 2.444669178  | -0.865628065 | -0.202640015 |
| O | 2.130805151  | -0.519393037 | -1.462409104 |
| C | 0.800859055  | -0.508445036 | 1.634084115  |
| C | -0.408043029 | -0.823061057 | 0.811221060  |
| C | -0.690440052 | -2.025852146 | 0.216271016  |
| C | -1.484475107 | 0.062733005  | 0.457162033  |
| N | -1.868038134 | -1.940740140 | -0.489943035 |
| C | -2.382894169 | -0.674693050 | -0.359218026 |
| C | -1.786839129 | 1.398472099  | 0.758034053  |
| C | -3.550364254 | -0.113936008 | -0.877205066 |
| C | -2.946419213 | 1.957988143  | 0.247742018  |
| C | -3.818983273 | 1.209270087  | -0.564431043 |
| O | 3.010745216  | -1.903070139 | 0.060558005  |
| H | 0.542340041  | 0.184894013  | 2.437205176  |
| H | 1.172451082  | -1.420303100 | 2.105354154  |
| H | -0.132763009 | -2.947885214 | 0.243132017  |
| H | -1.121063082 | 1.984937140  | 1.378207098  |
| H | -3.188969230 | 2.988813216  | 0.473884034  |
| H | -4.220942305 | -0.692892048 | -1.499709110 |
| H | -4.716766337 | 1.675339123  | -0.950520071 |
| H | 2.821582204  | 0.194575014  | 1.552293114  |
| H | -2.295503166 | -2.696806193 | -0.996201074 |
| C | 1.686737119  | 1.509488110  | 0.312234023  |
| H | 0.933529068  | 1.546030111  | -0.468702034 |
| H | 1.496862110  | 2.236037159  | 1.099334079  |
| H | 2.791117200  | 1.961793140  | -0.275767020 |
| H | 2.426675173  | -1.230690086 | -2.054308150 |
| C | 3.956321284  | 2.376479171  | -0.857249061 |
| H | 4.148360301  | 3.356002240  | -0.429282031 |
| H | 4.685385338  | 1.622858117  | -0.573369042 |
| H | 3.736967271  | 2.394100170  | -1.920484140 |

**10B-TS-CH<sub>3</sub>**

|   |              |              |              |
|---|--------------|--------------|--------------|
| C | 2.016845147  | 0.115308008  | 0.738166051  |
| C | 2.503412182  | -0.929580066 | -0.303457022 |
| O | 2.331016167  | -0.683866051 | -1.522277112 |
| C | 0.833692059  | -0.483223035 | 1.556836112  |
| C | -0.394093029 | -0.809065060 | 0.764013057  |
| C | -0.686158050 | -2.010364144 | 0.173078012  |
| C | -1.486911106 | 0.068781005  | 0.440584032  |
| N | -1.886134133 | -1.932927140 | -0.501777036 |
| C | -2.404775172 | -0.671311046 | -0.353278026 |
| C | -1.787729126 | 1.402936101  | 0.749820053  |
| C | -3.588858258 | -0.114831008 | -0.837327062 |
| C | -2.963428213 | 1.958920141  | 0.272311020  |
| C | -3.855388275 | 1.207213085  | -0.515782037 |
| O | 3.029476218  | -1.968455142 | 0.176966013  |
| H | 0.576096041  | 0.221849016  | 2.352856169  |
| H | 1.204807085  | -1.389946101 | 2.038235148  |
| H | -0.117489009 | -2.925684212 | 0.174640012  |
| H | -1.106234080 | 1.991319145  | 1.350790096  |
| H | -3.203499230 | 2.988935213  | 0.505494037  |
| H | -4.274146309 | -0.695818049 | -1.441974104 |
| H | -4.765732341 | 1.669465118  | -0.876564063 |
| H | 2.836138203  | 0.231563017  | 1.456574105  |
| H | -2.321566167 | -2.689824192 | -0.999498071 |
| C | 1.695247120  | 1.465246108  | 0.153377011  |
| H | 1.031060075  | 1.440937102  | -0.705875052 |
| H | 1.390331099  | 2.210509161  | 0.888809066  |
| H | 2.819842201  | 1.966167144  | -0.327175024 |
| C | 4.025470288  | 2.470922180  | -0.767265053 |
| H | 4.076665293  | 3.481850252  | -0.372630027 |
| H | 4.765626342  | 1.797382129  | -0.344697025 |
| H | 3.963147284  | 2.424629173  | -1.850507132 |

**11A-TS-CH<sub>3</sub>**

|   |              |              |              |
|---|--------------|--------------|--------------|
| C | -2.247968163 | 0.298541022  | 0.908292065  |
| C | -3.095821222 | -0.235718017 | -0.229751017 |
| O | -4.360954313 | -0.477516034 | 0.176004013  |
| C | -0.882290062 | 0.821882061  | 0.474099034  |
| C | 0.181328013  | -0.098567007 | 0.051015004  |
| C | 0.094163007  | -1.327058095 | -0.567019042 |
| C | 1.593281115  | 0.178594013  | 0.175473012  |
| N | 1.352569095  | -1.822561134 | -0.814657061 |
| C | 2.294321164  | -0.924651066 | -0.375055027 |
| C | 2.325592169  | 1.252363091  | 0.697877051  |
| C | 3.686772263  | -0.980308072 | -0.410640030 |
| C | 3.710567269  | 1.202924087  | 0.664115050  |

|   |              |              |              |
|---|--------------|--------------|--------------|
| C | 4.384355314  | 0.096722007  | 0.115310008  |
| O | -2.740861200 | -0.429145031 | -1.367876097 |
| H | -0.511278037 | 1.499111108  | 1.244305092  |
| H | -1.109814080 | 1.642033119  | -0.460785033 |
| H | -0.776478055 | -1.885843134 | -0.860079064 |
| H | 1.818913129  | 2.111477153  | 1.120216080  |
| H | 4.286604306  | 2.027670145  | 1.064726078  |
| H | 4.202860302  | -1.832789130 | -0.834060059 |
| H | 5.466952385  | 0.086326006  | 0.102645007  |
| H | -2.812765201 | 1.154237082  | 1.291653094  |
| H | 1.547336110  | -2.707031194 | -1.251213088 |
| C | -2.156183153 | -0.733698054 | 2.050121146  |
| H | -1.645952116 | -1.637784117 | 1.718454125  |
| H | -1.585818112 | -0.307572022 | 2.875961204  |
| H | -3.146821225 | -1.002741070 | 2.414314174  |
| H | -4.862218351 | -0.819823059 | -0.581837042 |
| C | -1.412017100 | 2.654022192  | -1.489825105 |
| H | -2.475300180 | 2.833092206  | -1.371238098 |
| H | -1.134189080 | 2.132994156  | -2.399370172 |
| H | -0.772096055 | 3.487578252  | -1.220173085 |

### 11B-TS-CH<sub>3</sub>

|   |              |              |              |
|---|--------------|--------------|--------------|
| C | -2.406798175 | 0.329089024  | 0.861398060  |
| C | -3.064183223 | -0.280286020 | -0.413544030 |
| O | -3.299278238 | -1.516378108 | -0.426057030 |
| C | -0.976178071 | 0.814453058  | 0.622056043  |
| C | 0.059981004  | -0.130032009 | 0.178663013  |
| C | -0.077402005 | -1.374934099 | -0.394941028 |
| C | 1.478994106  | 0.133126010  | 0.213210015  |
| N | 1.161833082  | -1.891954136 | -0.704830048 |
| C | 2.136257153  | -0.994049069 | -0.345020025 |
| C | 2.249855162  | 1.214561087  | 0.657749048  |
| C | 3.523927252  | -1.064235075 | -0.459669033 |
| C | 3.630609264  | 1.150340083  | 0.545237038  |
| C | 4.260995308  | 0.020808001  | -0.007689001 |
| O | -3.315687236 | 0.527900038  | -1.342150098 |
| H | -0.625494044 | 1.390935102  | 1.482696109  |
| H | -1.022845075 | 1.741317127  | -0.237566017 |
| H | -0.978009072 | -1.931626142 | -0.591534041 |
| H | 1.773433127  | 2.090373151  | 1.081031077  |
| H | 4.236569306  | 1.980814141  | 0.885661064  |
| H | 4.007709290  | -1.933725139 | -0.886998062 |
| H | 5.340966395  | -0.001854000 | -0.083095006 |
| H | -2.993715218 | 1.226757088  | 1.081915078  |
| H | 1.322929094  | -2.794828204 | -1.116214082 |
| C | -2.477747180 | -0.594664045 | 2.081391151  |



|   |              |              |              |
|---|--------------|--------------|--------------|
| H | -1.902043138 | -1.504593109 | 1.914879137  |
| H | -2.078971149 | -0.092252006 | 2.967143212  |
| H | -3.508910255 | -0.886246064 | 2.288277166  |
| C | -0.980155071 | 2.885692208  | -1.163965085 |
| H | -1.641975116 | 3.614722262  | -0.707934049 |
| H | -1.360354097 | 2.428295175  | -2.068971149 |
| H | 0.068674005  | 3.164199226  | -1.179081086 |

### 12A-TS-CH<sub>3</sub>

|   |              |              |              |
|---|--------------|--------------|--------------|
| O | 0.517515037  | -1.608026115 | 1.519830112  |
| H | -0.716486050 | 1.912788135  | -0.202394014 |
| N | 2.147073155  | -1.657550120 | -0.033954002 |
| C | 0.219304016  | -0.135805010 | -0.365703026 |
| C | -2.436447177 | -0.362306026 | 1.262744093  |
| H | 1.602222115  | 2.697122192  | 1.528504110  |
| C | -2.269331165 | -0.827569060 | -0.162251011 |
| N | -1.079363078 | -0.649141049 | -0.800284057 |
| H | -2.550962181 | 0.723058051  | 1.280868091  |
| C | 0.980252069  | -1.202455088 | 0.455844033  |
| H | -1.097692079 | -0.990550070 | -1.750121123 |
| H | 0.748134051  | 0.056951004  | -1.296880095 |
| H | 2.607425187  | -2.333452165 | 0.558275039  |
| H | -3.343899242 | -0.810544057 | 1.658954118  |
| H | -0.195187014 | 1.077096078  | 1.418583099  |
| O | -3.205426229 | -1.339631097 | -0.775430056 |
| H | -1.582597116 | -0.636825046 | 1.876314133  |
| C | 0.165600012  | 1.178930085  | 0.401917029  |
| C | -1.655312119 | 2.717499194  | -0.883639062 |
| H | -1.181964086 | 2.863421206  | -1.849599133 |
| H | -1.706907123 | 3.609264259  | -0.266872019 |
| H | -2.569243186 | 2.133994153  | -0.914954068 |
| C | 2.823822201  | -1.280908092 | -1.269859093 |
| H | 2.190783159  | -1.450112104 | -2.141112153 |
| H | 3.144885225  | -0.238610017 | -1.253250093 |
| H | 3.706991269  | -1.906717139 | -1.370437098 |
| S | 1.750405128  | 2.031056144  | 0.373392027  |

### 12B-TS-CH<sub>3</sub>

|   |              |              |              |
|---|--------------|--------------|--------------|
| O | 0.767739058  | -1.845965135 | 1.000292070  |
| H | -0.829245060 | 1.957892140  | 0.143240010  |
| N | 2.565593186  | -0.928455067 | 0.000342000  |
| C | 0.341764024  | 0.099255007  | -0.360427026 |
| C | -2.220062160 | -0.703737049 | 1.201935087  |
| H | 1.316348092  | 2.576537186  | 1.428591101  |
| C | -2.017422146 | -0.934932070 | -0.275517020 |
| N | -0.889735062 | -0.475675034 | -0.882422065 |

|   |              |              |              |
|---|--------------|--------------|--------------|
| H | -2.469517178 | 0.343680024  | 1.380034098  |
| C | 1.247714089  | -0.985267071 | 0.264837019  |
| H | -0.867480063 | -0.691492051 | -1.868127137 |
| H | 0.835566061  | 0.534868037  | -1.227395090 |
| H | 3.106117223  | -1.652012117 | 0.451468032  |
| H | -3.055434219 | -1.317874097 | 1.527731109  |
| H | -0.164110012 | 0.954456070  | 1.616435117  |
| O | -2.879744208 | -1.495278108 | -0.952377070 |
| H | -1.329814097 | -0.957811069 | 1.770944126  |
| O | 1.303801093  | 2.039604145  | 0.628082043  |
| C | 0.147380010  | 1.252562088  | 0.616655043  |
| C | -1.812296132 | 2.821110204  | -0.424570031 |
| H | -1.421237103 | 3.017255218  | -1.418048101 |
| H | -1.809657131 | 3.680604263  | 0.238577017  |
| H | -2.730811198 | 2.243459161  | -0.411144030 |
| C | 3.270520233  | -0.044309003 | -0.922953069 |
| H | 2.978923216  | -0.229677016 | -1.958801140 |
| H | 3.094626224  | 1.000462073  | -0.677505050 |
| H | 4.334756314  | -0.246413018 | -0.829175060 |

### 13A-TS-CH<sub>3</sub>

|   |              |              |              |
|---|--------------|--------------|--------------|
| H | -0.230879017 | 0.465195034  | -1.787714129 |
| H | -6.292357449 | -0.698669049 | -0.390329028 |
| H | -5.923185408 | -0.687289050 | 1.300679096  |
| C | 2.534127180  | -2.055470149 | -0.369564026 |
| O | 2.251558160  | 2.826999201  | 0.280367020  |
| O | -0.505495036 | 2.664140193  | -0.471597034 |
| C | 1.808415130  | -0.779602058 | -0.768919054 |
| O | -1.359904100 | -0.014043001 | 1.857379134  |
| H | -2.125669152 | 0.019047001  | -2.446838175 |
| H | -4.543596327 | -0.403864029 | -2.107314152 |
| C | -2.156867157 | -0.091088006 | 0.927360067  |
| N | -1.687249119 | 0.050317004  | -0.413162030 |
| O | 3.744291269  | -2.135206154 | -0.393041028 |
| O | 1.734156126  | -3.057321217 | -0.025992002 |
| C | -0.289480021 | 0.311563023  | -0.704860053 |
| O | 3.824833274  | 0.626404043  | -0.635299047 |
| C | 0.276375020  | 1.563013113  | -0.031504002 |
| C | 1.732630127  | 1.718802122  | -0.445834032 |
| C | -4.313838313 | -0.409827029 | 0.084035006  |
| C | 2.518169184  | 0.451560033  | -0.189183013 |
| O | 0.461736033  | -0.838553060 | -0.345893025 |
| N | -5.613207398 | -0.620034046 | 0.345780025  |
| N | -3.483333250 | -0.306452022 | 1.110619081  |
| C | -2.553329186 | -0.078065006 | -1.459262103 |
| C | -3.868494276 | -0.307467022 | -1.271402089 |

|   |              |              |              |
|---|--------------|--------------|--------------|
| H | 1.871224136  | -0.734666051 | -1.869554137 |
| H | 2.520793183  | 0.259595019  | 1.098611080  |
| H | 1.767732126  | 1.934277140  | -1.525163112 |
| H | 0.220605016  | 1.447054105  | 1.050106075  |
| H | 4.277692310  | -0.231261016 | -0.568634044 |
| H | -0.081308006 | 3.469404252  | -0.148833011 |
| H | 3.155602228  | 2.987838213  | -0.016817001 |
| H | 2.281972162  | -3.831049276 | 0.192567014  |
| C | 2.579430187  | -0.025826002 | 2.490069179  |
| H | 2.201527161  | 0.880300065  | 2.951492213  |
| H | 1.939232138  | -0.893519066 | 2.613125188  |
| H | 3.634912263  | -0.214129015 | 2.658929189  |

### 13B-TS-CH<sub>3</sub>

|   |              |              |              |
|---|--------------|--------------|--------------|
| H | 0.297482021  | -1.356119096 | -1.126019080 |
| H | 5.893210427  | 1.821030129  | 0.188164014  |
| H | 6.275112462  | 0.154861011  | -0.083100006 |
| C | -2.005294145 | 1.852873131  | 0.141747010  |
| O | -2.668729192 | -0.886976064 | 1.754369125  |
| O | 0.300090022  | -1.865872132 | 1.550596112  |
| C | -1.756437129 | 0.770219058  | -0.913485066 |
| O | 2.311216164  | -2.273378165 | -0.368370027 |
| H | 1.170918082  | 1.893817136  | 0.082039006  |
| H | 3.555536258  | 2.608352190  | 0.344552025  |
| C | 2.670110191  | -1.086910077 | -0.295929021 |
| N | 1.676140123  | -0.085865006 | -0.265605019 |
| O | -3.277969233 | 2.259916160  | 0.110497008  |
| O | -1.165393085 | 2.308104168  | 0.875906063  |
| C | 0.277021020  | -0.484688035 | -0.470909034 |
| O | -2.341309167 | -1.446275104 | -1.682113121 |
| C | -0.398499029 | -0.846625061 | 0.856612064  |
| C | -1.872100136 | -1.242018088 | 0.626969046  |
| C | 4.281403309  | 0.565716038  | -0.027016002 |
| C | -2.442440178 | -0.555179040 | -0.603709044 |
| O | -0.359396026 | 0.596243041  | -1.130841081 |
| N | 5.584890383  | 0.878854061  | 0.025603002  |
| N | 3.961467284  | -0.708810049 | -0.231009016 |
| C | 2.000435144  | 1.207544085  | 0.000659000  |
| C | 3.291889236  | 1.582231116  | 0.140069010  |
| H | -2.155714154 | 1.165957082  | -1.850393132 |
| H | -3.715019269 | -0.345306025 | -0.399055029 |
| H | -1.908518135 | -2.320867166 | 0.450093033  |
| H | -0.389645028 | 0.048163003  | 1.484006108  |
| H | -2.655806191 | -1.021928074 | -2.491119177 |
| H | 0.901538064  | -2.317376168 | 0.928952065  |
| H | -2.272107166 | -1.285694093 | 2.539238185  |

|   |              |              |              |
|---|--------------|--------------|--------------|
| H | -3.408099248 | 2.947117214  | 0.785120054  |
| C | -5.117262369 | -0.301757022 | -0.354111026 |
| H | -5.322948386 | 0.248333018  | 0.556538041  |
| H | -5.397217407 | -1.350136097 | -0.329597023 |
| H | -5.387245379 | 0.218018016  | -1.268085090 |

### 13C-TS-CH<sub>3</sub>

|   |              |              |              |
|---|--------------|--------------|--------------|
| H | -0.211059015 | 0.383640027  | -1.781765129 |
| H | -6.289386436 | -0.731377051 | -0.417715030 |
| H | -5.941416411 | -0.665690046 | 1.276588090  |
| C | 2.565876185  | -2.138052154 | -0.326941024 |
| O | 2.271888166  | 2.808065202  | 0.211251015  |
| O | -0.491099035 | 2.626425191  | -0.547232041 |
| C | 1.818624129  | -0.837865061 | -0.727440051 |
| O | -1.387791101 | 0.038429003  | 1.869693136  |
| H | -2.095659151 | -0.071260005 | -2.441047177 |
| H | -4.519828325 | -0.477921034 | -2.121232154 |
| C | -2.169540158 | -0.071739005 | 0.929598069  |
| N | -1.682925122 | 0.023060002  | -0.406612029 |
| O | 3.819930278  | -2.074622148 | -0.517986037 |
| O | 1.924075137  | -3.102700225 | 0.107841008  |
| C | -0.273063020 | 0.259673019  | -0.693852049 |
| O | 3.836733274  | 0.524931038  | -0.571501041 |
| C | 0.288134021  | 1.537241112  | -0.063561004 |
| C | 1.746805124  | 1.671201121  | -0.472840034 |
| C | -4.317359310 | -0.418438030 | 0.071315005  |
| C | 2.512130181  | 0.404805029  | -0.167361012 |
| O | 0.461401033  | -0.878299066 | -0.298381022 |
| N | -5.620733410 | -0.622550045 | 0.323979023  |
| N | -3.499746254 | -0.281782020 | 1.104012080  |
| C | -2.536163184 | -0.135835010 | -1.456417103 |
| C | -3.855497275 | -0.357006026 | -1.279873090 |
| H | 1.855196135  | -0.785902056 | -1.828996130 |
| H | 2.479881178  | 0.256720019  | 1.110823078  |
| H | 1.789861128  | 1.847161134  | -1.559719112 |
| H | 0.223713016  | 1.462969106  | 1.021044073  |
| H | 4.150362300  | -0.420771030 | -0.613242045 |
| H | -0.054423004 | 3.440563245  | -0.266780019 |
| H | 3.201013230  | 2.896514211  | -0.035062003 |
| C | 2.537250183  | 0.016261001  | 2.538909185  |
| H | 1.901104135  | 0.782780059  | 2.968843215  |
| H | 2.156269155  | -0.994786070 | 2.639062192  |
| H | 3.593925257  | 0.126965009  | 2.760847198  |

### 13D-TS-CH<sub>3</sub>

|   |              |              |             |
|---|--------------|--------------|-------------|
| H | -0.314755022 | -1.336963097 | 1.230800086 |
|---|--------------|--------------|-------------|

|   |              |              |              |
|---|--------------|--------------|--------------|
| H | -5.862947415 | 1.786466128  | -0.280940020 |
| H | -6.243409453 | 0.123691009  | 0.014089001  |
| C | 1.874810137  | 1.987031142  | -0.301790022 |
| O | 2.714539193  | -1.388226100 | -1.576257112 |
| O | -0.172638013 | -2.011952147 | -1.382504102 |
| C | 1.748729128  | 0.914188068  | 0.831730060  |
| O | -2.284340167 | -2.290959163 | 0.410199030  |
| H | -1.123779078 | 1.853306136  | -0.121683009 |
| H | -3.521633253 | 2.573966183  | -0.416347030 |
| C | -2.639002189 | -1.103179081 | 0.302894022  |
| N | -1.646736119 | -0.106777007 | 0.261925019  |
| O | 3.004132215  | 2.516663182  | -0.374973027 |
| O | 0.859179061  | 2.245247161  | -0.986755070 |
| C | -0.242898017 | -0.491690035 | 0.541589038  |
| O | 2.720348194  | -1.079871078 | 1.830651132  |
| C | 0.487819035  | -0.934736068 | -0.728036053 |
| C | 1.927322137  | -1.329691096 | -0.385365028 |
| C | -4.249349307 | 0.540548040  | -0.018511001 |
| C | 2.548235183  | -0.365345026 | 0.621843043  |
| O | 0.379305027  | 0.593278045  | 1.182353084  |
| N | -5.554813377 | 0.848965061  | -0.094097007 |
| N | -3.931125282 | -0.730202055 | 0.212568015  |
| C | -1.966977140 | 1.181325083  | -0.024970002 |
| C | -3.259482236 | 1.552015111  | -0.188702013 |
| H | 2.129797153  | 1.407616102  | 1.727978125  |
| H | 3.749583269  | -0.074804005 | 0.221200016  |
| H | 1.902982137  | -2.317597168 | 0.086502006  |
| H | 0.517108037  | -0.086699006 | -1.415144104 |
| H | 3.014446218  | -0.467955034 | 2.517482179  |
| H | -0.840464062 | -2.384873171 | -0.773204056 |
| H | 2.260662163  | -1.985908144 | -2.184845155 |
| C | 5.151338373  | 0.042384003  | 0.012596001  |
| H | 5.225372377  | 0.549769039  | -0.941960068 |
| H | 5.500037393  | -0.985514070 | 0.011734001  |
| H | 5.488260395  | 0.631061047  | 0.860179063  |

#### 14A-TS-CH<sub>3</sub>

|   |              |              |              |
|---|--------------|--------------|--------------|
| O | -2.673595892 | -1.063219468 | -0.077514890 |
| H | 1.064191895  | 1.454192463  | 0.089799121  |
| C | -0.621131035 | 0.114274382  | -0.487934920 |
| N | -1.411014357 | 1.335574943  | -0.569057925 |
| C | -1.463862844 | -1.134164203 | -0.100671892 |
| H | -2.215421530 | 1.144022415  | -1.154225969 |
| H | -0.267788145 | -0.113686847 | -1.499652991 |
| H | 0.386974207  | 0.393360795  | 1.457571218  |
| C | 0.602992162  | 0.294458658  | 0.398248144  |

|   |              |              |              |
|---|--------------|--------------|--------------|
| C | 1.789482735  | -0.563386119 | 0.205388129  |
| O | 2.565616602  | -0.870190604 | 1.087065195  |
| O | 1.987000530  | -0.921320260 | -1.083348963 |
| H | 2.807433280  | -1.437680794 | -1.131232969 |
| C | 1.596037700  | 2.733151235  | -0.258094904 |
| H | 1.679635661  | 2.656627183  | -1.336133982 |
| H | 2.535363777  | 2.744611675  | 0.284047136  |
| H | 0.838148059  | 3.418702743  | 0.100683122  |
| C | -0.739460566 | -2.424103731 | 0.176948127  |
| H | 0.012474369  | -2.617675197 | -0.589486929 |
| H | -0.214391487 | -2.350248040 | 1.132924198  |
| H | -1.450290114 | -3.246094363 | 0.223348131  |
| C | -1.882487070 | 1.869988269  | 0.710885164  |
| H | -2.594282637 | 2.670233754  | 0.509306152  |
| H | -2.374540551 | 1.126815508  | 1.349831211  |
| H | -1.052002746 | 2.304325800  | 1.268410206  |

### 14B-TS-CH<sub>3</sub>

|   |              |              |              |
|---|--------------|--------------|--------------|
| O | 2.729651199  | -0.872148063 | 0.018994001  |
| H | -1.195746084 | 1.351150096  | -0.089599006 |
| C | 0.599817041  | 0.143081010  | 0.490156035  |
| N | 1.309290095  | 1.417674100  | 0.587169043  |
| C | 1.525400110  | -1.027559076 | 0.084938006  |
| H | 2.153050154  | 1.259154091  | 1.126022081  |
| H | 0.256131018  | -0.130416009 | 1.495711107  |
| H | -0.451826033 | 0.300578022  | -1.437550103 |
| C | -0.648413049 | 0.216213016  | -0.370633027 |
| C | -1.791363129 | -0.745777054 | -0.071030005 |
| O | -2.531291181 | -1.047185074 | -1.043575075 |
| O | -1.933248139 | -1.121462081 | 1.122170083  |
| C | -1.869539135 | 2.563173185  | 0.227627017  |
| H | -1.841030134 | 2.584281187  | 1.311759094  |
| H | -2.856241208 | 2.409491174  | -0.197515014 |
| H | -1.281243093 | 3.336194241  | -0.254368018 |
| C | 0.892122064  | -2.368971172 | -0.171526012 |
| H | 0.149085011  | -2.592103188 | 0.594698044  |
| H | 0.356346026  | -2.335909167 | -1.123914082 |
| H | 1.656997120  | -3.141890224 | -0.213736015 |
| C | 1.691520119  | 2.016025145  | -0.693423051 |
| H | 2.348001169  | 2.865245206  | -0.500006036 |
| H | 2.214749157  | 1.327167095  | -1.369006097 |
| H | 0.808532057  | 2.392588173  | -1.210036087 |

### 15-TS-CH<sub>3</sub>

|   |             |              |             |
|---|-------------|--------------|-------------|
| P | 5.485431836 | -0.757175801 | 0.234027586 |
| O | 6.173288334 | -1.773719217 | 1.210872626 |

|   |              |              |              |
|---|--------------|--------------|--------------|
| O | 6.280547853  | -0.726965173 | -1.123729468 |
| O | 5.266414533  | 0.537555824  | 0.898638887  |
| O | 4.149792291  | -1.502815375 | -0.221430779 |
| P | 2.814766824  | -1.092870216 | -1.023414268 |
| O | 3.304467461  | -0.516523194 | -2.402460726 |
| O | 1.865929030  | -2.199193865 | -1.042149514 |
| O | 2.355305281  | 0.258655602  | -0.341957251 |
| P | 1.927090013  | 0.619938916  | 1.195647773  |
| O | 3.020930989  | 1.662432013  | 1.596940714  |
| O | 1.751682678  | -0.577065859 | 2.017567210  |
| O | 0.612900260  | 1.442779925  | 1.008279524  |
| C | 0.530550760  | 2.662046032  | 0.231915503  |
| C | -0.873881018 | 2.831474802  | -0.290667998 |
| O | -1.190460211 | 1.787728660  | -1.225446199 |
| C | -2.004497998 | 2.812331186  | 0.719099212  |
| O | -2.086546062 | 4.009479213  | 1.414304744  |
| C | -3.206073588 | 2.361917123  | -0.095740038 |
| O | -3.758521777 | 3.479568757  | -0.776075235 |
| C | -2.537106543 | 1.390319023  | -1.093250092 |
| N | -2.578921896 | -0.005045744 | -0.644455666 |
| C | -1.517618177 | -0.848922632 | -0.381545461 |
| N | -1.899956328 | -2.049037841 | -0.033275973 |
| C | -3.279591765 | -2.007201786 | -0.074255608 |
| C | -4.253571750 | -3.014841964 | 0.192475421  |
| O | -4.098801809 | -4.179164560 | 0.545765162  |
| N | -5.559849874 | -2.508773102 | -0.004319965 |
| C | -5.884960289 | -1.237875800 | -0.401659358 |
| N | -7.200548906 | -0.934021038 | -0.497411653 |
| N | -4.980907410 | -0.314817016 | -0.647821212 |
| C | -3.716453461 | -0.745682162 | -0.463380181 |
| H | 1.230656574  | 2.618596611  | -0.602704824 |
| H | 0.785395750  | 3.503383824  | 0.876056174  |
| H | -0.892691787 | 3.798868526  | -0.811660590 |
| H | -1.845078276 | 1.851963989  | 1.597674233  |
| H | -2.898862339 | 4.028696195  | 1.935623933  |
| H | -3.960585384 | 1.858165878  | 0.508758083  |
| H | -4.631143300 | 3.235807078  | -1.108155914 |
| H | -3.035728986 | 1.446806779  | -2.062202771 |
| H | -0.502807898 | -0.510206273 | -0.472101740 |
| H | -7.889455186 | -1.664470552 | -0.565465351 |
| H | -7.427886998 | -0.060881184 | -0.943966411 |
| H | -6.299724072 | -3.173476412 | 0.177570806  |
| H | 3.943429489  | 1.321807990  | 1.417118559  |
| H | 3.268212263  | -1.150829831 | -3.132833430 |
| H | 7.125084844  | -0.253292655 | -1.099307499 |
| H | 6.435600756  | -2.624940187 | 0.830934072  |

|   |              |             |             |
|---|--------------|-------------|-------------|
| C | -1.894512332 | 0.950647343 | 2.688745845 |
| H | -1.380935017 | 0.069210427 | 2.324234374 |
| H | -2.955520326 | 0.817663460 | 2.876667714 |
| H | -1.360377756 | 1.491862448 | 3.463083473 |

### 16-TS-CH<sub>3</sub>

|   |              |              |              |
|---|--------------|--------------|--------------|
| C | 0.795370043  | 1.317853141  | 0.566790025  |
| C | 1.911763198  | 0.268375149  | 0.626861025  |
| C | 1.550042259  | -0.918975963 | -0.265845037 |
| C | 0.181951199  | -1.465405099 | 0.098218989  |
| C | -0.864785958 | -0.343891096 | 0.070128987  |
| O | -0.453642006 | 0.735549010  | 0.910504047  |
| N | 3.241596262  | 0.743972279  | 0.261747001  |
| O | 2.503066401  | -1.966276969 | -0.120651026 |
| O | -0.245519760 | -2.458111201 | -0.842510078 |
| C | -2.223711022 | -0.765776223 | 0.582194025  |
| O | -2.819019991 | -1.823582345 | -0.110902026 |
| O | 0.788585001  | 1.872493182  | -0.719443072 |
| C | -0.081160143 | 2.993549199  | -0.869313080 |
| H | 0.949232995  | 2.097540212  | 1.321031078  |
| H | 1.952841228  | -0.090415874 | 1.657860102  |
| H | 1.517274233  | -0.585323939 | -1.310824112 |
| H | 0.226415233  | -1.894085127 | 1.106287061  |
| H | -0.963395990 | -0.003281079 | -0.968102085 |
| H | 3.635560246  | 1.325448348  | 0.991467055  |
| H | 3.188387214  | 1.306994318  | -0.580754060 |
| H | 3.368712432  | -1.529453877 | -0.106631025 |
| H | 0.357158338  | -3.210001215 | -0.790001074 |
| H | -2.232956013 | -0.912767237 | 1.666967105  |
| H | -2.978665153 | 0.273855796  | 0.391940011  |
| H | -2.118665904 | -2.328829331 | -0.559268056 |
| H | 0.041484840  | 3.352918237  | -1.888826153 |
| H | -1.122561198 | 2.708765107  | -0.705694068 |
| H | 0.187987819  | 3.789830279  | -0.167473030 |
| C | -3.784123293 | 1.386052817  | 0.056935986  |
| H | -3.551797287 | 1.568274849  | -0.988082088 |
| H | -3.449174324 | 2.168169896  | 0.730926033  |
| H | -4.798847343 | 1.043289721  | 0.235139999  |

### 17A-TS-CH<sub>3</sub>

|   |              |              |              |
|---|--------------|--------------|--------------|
| O | -3.185223232 | -0.947025066 | -0.708991048 |
| O | -1.026457075 | -0.184032013 | 0.176630013  |
| H | 2.889974209  | 0.722056054  | -1.120513081 |
| O | -3.008830219 | -0.011095001 | 1.723926125  |
| C | 1.258446089  | 1.543280109  | -0.003020000 |
| O | 2.914866210  | -1.786791128 | -0.313102023 |



|   |              |              |              |
|---|--------------|--------------|--------------|
| H | 3.977764287  | -0.087788006 | 1.008831075  |
| H | 0.779481056  | 1.387368098  | 0.967154069  |
| C | 0.777037057  | -1.049701074 | -1.171257084 |
| H | -0.115701008 | -2.653818189 | -1.865704135 |
| H | 3.957227283  | 1.522485110  | 0.803595060  |
| C | 1.683293123  | 2.988798214  | -0.143664010 |
| H | -2.770253202 | 2.244408161  | 0.180442013  |
| O | -2.892709209 | 1.474503106  | -0.391816028 |
| H | 2.515721183  | -2.659971192 | -0.430357031 |
| C | -0.289082021 | 0.044298003  | -1.047466073 |
| H | -4.147394298 | -0.904730067 | -0.796230056 |
| P | -2.572366184 | 0.088551006  | 0.326852023  |
| O | 0.249717018  | -2.360777169 | -1.023235073 |
| O | 0.279361020  | 1.308829092  | -1.044857076 |
| H | 2.175645154  | 3.152410226  | -1.104368079 |
| C | 2.419154172  | 0.548094039  | -0.137932010 |
| H | 1.219693090  | -0.929546067 | -2.168823155 |
| H | -0.977185069 | 0.008162001  | -1.892181137 |
| H | 2.370294168  | 3.263755236  | 0.656473048  |
| C | 1.873592135  | -0.862790060 | -0.147564011 |
| N | 3.363799243  | 0.718024051  | 0.968156072  |
| H | 1.358774100  | -1.086875077 | 1.031390075  |
| H | 0.812209061  | 3.641306264  | -0.081334006 |
| C | 0.917626064  | -1.443980104 | 2.332059170  |
| H | 0.422641030  | -0.550389039 | 2.695882192  |
| H | 1.833319132  | -1.701290123 | 2.854711203  |
| H | 0.250491018  | -2.278865161 | 2.145774157  |

### 17B-TS-CH<sub>3</sub>

|   |              |              |              |
|---|--------------|--------------|--------------|
| O | -2.673836191 | -1.245110087 | -0.136159010 |
| O | -0.968043071 | 0.609640041  | 0.210193015  |
| H | 3.045131217  | 0.198120014  | -1.030635072 |
| O | -2.985569217 | 0.597538044  | 1.677194122  |
| C | 1.734154126  | 1.411732101  | 0.152356011  |
| O | 2.186384156  | -2.238213162 | -0.506908036 |
| H | 3.708431266  | -1.131132081 | 1.010500073  |
| H | 1.208064086  | 1.338522095  | 1.107897077  |
| C | 0.457855033  | -0.733934051 | -1.283442094 |
| H | -1.243439088 | -1.686684122 | -0.892324062 |
| H | 4.243401307  | 0.400216029  | 0.967964070  |
| C | 2.626894190  | 2.634942187  | 0.146764011  |
| H | -3.357610240 | 1.992031142  | -0.543351039 |
| O | -3.244030234 | 1.077681078  | -0.832178062 |
| H | 1.508970108  | -2.878304205 | -0.769817057 |
| C | -0.214608015 | 0.616670045  | -0.998125073 |
| P | -2.534351181 | 0.177160013  | 0.324889023  |

|   |              |              |              |
|---|--------------|--------------|--------------|
| O | -0.431081031 | -1.821498133 | -1.446711103 |
| O | 0.764589056  | 1.614496117  | -0.899907066 |
| H | 3.168353230  | 2.710199193  | -0.798736060 |
| C | 2.501911181  | 0.100376007  | -0.074743006 |
| H | 0.973962072  | -0.605978045 | -2.244809161 |
| H | -0.861013062 | 0.900120065  | -1.831369130 |
| H | 3.348555239  | 2.587117185  | 0.962464067  |
| C | 1.516702108  | -1.033231073 | -0.239794017 |
| N | 3.405800248  | -0.164162012 | 1.049156074  |
| H | 0.911715064  | -1.203852084 | 0.902989063  |
| H | 2.027530146  | 3.536334252  | 0.277764020  |
| C | 0.322097023  | -1.577626115 | 2.139623154  |
| H | 0.255452018  | -0.647951045 | 2.694125196  |
| H | 1.017193075  | -2.302636163 | 2.551811183  |
| H | -0.637368046 | -1.984229144 | 1.838073134  |

### 17C-TS-CH<sub>3</sub>

|   |              |              |              |
|---|--------------|--------------|--------------|
| O | -2.612590190 | -1.244432089 | 0.057604004  |
| O | -0.974657073 | 0.688090050  | 0.220786016  |
| H | 3.021898219  | 0.149206011  | -1.053171075 |
| O | -3.050042220 | 0.737802051  | 1.618757115  |
| C | 1.770247126  | 1.382779099  | 0.170634013  |
| O | 2.080755149  | -2.271710161 | -0.548412038 |
| H | 3.681849264  | -1.241512089 | 0.943817067  |
| H | 1.246447090  | 1.304039096  | 1.127868079  |
| C | 0.393169028  | -0.696037049 | -1.270076093 |
| H | -1.330929095 | -1.593994112 | -0.785821055 |
| H | 4.265088308  | 0.272366020  | 0.922693068  |
| C | 2.708328197  | 2.572928186  | 0.193620014  |
| O | -3.236186234 | 1.026684076  | -0.932088065 |
| H | 1.366363100  | -2.863438204 | -0.828447060 |
| C | -0.231051017 | 0.676607047  | -0.959846068 |
| P | -2.619828187 | 0.285485021  | 0.240352017  |
| O | -0.539713041 | -1.748188124 | -1.405285103 |
| O | 0.812416059  | 1.636696118  | -0.871550061 |
| H | 3.247206234  | 2.654524190  | -0.753255053 |
| C | 2.492834177  | 0.051160004  | -0.088742007 |
| H | 0.895948063  | -0.587960041 | -2.242963163 |
| H | -0.853953060 | 0.996118073  | -1.800296128 |
| H | 3.433274247  | 2.479094180  | 1.002822071  |
| C | 1.464587108  | -1.040980074 | -0.253923018 |
| N | 3.411481246  | -0.266492019 | 1.011035072  |
| H | 0.872062061  | -1.208219088 | 0.897246066  |
| H | 2.142894152  | 3.492184253  | 0.350901025  |
| C | 0.260323019  | -1.594613112 | 2.114478154  |
| H | 0.373449027  | -0.729506054 | 2.759743196  |

|   |              |              |             |
|---|--------------|--------------|-------------|
| H | 0.822188058  | -2.468479175 | 2.432035177 |
| H | -0.757205054 | -1.781835129 | 1.788931131 |

### 18-TS-CH<sub>3</sub>

|   |              |              |              |
|---|--------------|--------------|--------------|
| H | 1.935646137  | -0.382300027 | -2.211271161 |
| C | -4.518549325 | -1.148984082 | 0.093083007  |
| C | -1.459317106 | -0.555460038 | -1.544316111 |
| C | 2.106448154  | -0.055657004 | -1.177497083 |
| C | -0.625094044 | 1.689834124  | -0.634183044 |
| N | -1.592861112 | 0.584834043  | -0.793380056 |
| N | -2.458662175 | -1.394920103 | -1.399836101 |
| O | 1.844557132  | 3.283813234  | 0.531796036  |
| N | -3.318974236 | 1.311025093  | 0.769653055  |
| C | -2.771561201 | 0.457895033  | -0.105560008 |
| C | 1.668217122  | 1.400130101  | -1.054770074 |
| C | -3.295494240 | -0.774826054 | -0.494311035 |
| O | 5.451432410  | -1.096745080 | 0.334692024  |
| O | 3.473938248  | -0.151330011 | -0.853619059 |
| O | 3.408518245  | -2.595970188 | -0.093948007 |
| C | -4.468557320 | 0.848617059  | 1.253707090  |
| H | 1.493069110  | -0.687218051 | -0.528353038 |
| H | -4.680275338 | -2.994875217 | -0.770256058 |
| H | -0.320369023 | 2.296421167  | 1.475158106  |
| N | -5.085698365 | -0.306462022 | 0.973909070  |
| H | 2.210502160  | 1.283853090  | 1.037772075  |
| C | 0.097334007  | 1.661730118  | 0.701056052  |
| O | 0.353056026  | 1.589179113  | -1.637992116 |
| H | 2.358193170  | 2.029603145  | -1.619144119 |
| O | 3.271851235  | -0.720053054 | 1.636738119  |
| H | -1.199077085 | 2.610440185  | -0.771667056 |
| H | -0.030185002 | 0.440083032  | 1.229444091  |
| C | 1.556820115  | 1.877980137  | 0.394134028  |
| H | -4.975412360 | 1.485223105  | 1.971448142  |
| H | -0.605229042 | -0.700454049 | -2.182641158 |
| N | -5.143219371 | -2.304382168 | -0.205280015 |
| H | -5.954530428 | -2.577411185 | 0.322886023  |
| P | 3.938613283  | -1.242560088 | 0.366472026  |
| H | 2.798562200  | 3.400307245  | 0.443878032  |
| C | -0.116188008 | -0.777307053 | 1.825106132  |
| H | -0.648888049 | -0.580383043 | 2.750966199  |
| H | -0.670580046 | -1.394861099 | 1.124543083  |
| H | 0.934125069  | -1.035556076 | 1.934673139  |

### 19-TS-CH<sub>3</sub>

|   |              |             |              |
|---|--------------|-------------|--------------|
| H | -1.383997281 | 1.477196978 | -1.765012028 |
| C | 0.362024813  | 2.153441110 | 1.016786170  |

|   |              |              |              |
|---|--------------|--------------|--------------|
| H | 1.346723904  | 1.743789126  | 0.783918155  |
| H | 0.488125775  | 3.130125185  | 1.476206205  |
| H | -0.144302191 | 1.485591036  | 1.709135224  |
| C | -0.423910252 | 2.330705085  | -0.258227919 |
| H | 0.230186000  | -1.885905185 | -0.015153902 |
| H | -1.241305165 | -0.678039175 | -1.472800007 |
| H | -3.243441259 | -1.733230347 | 1.344504196  |
| H | 0.670856964  | -0.447396063 | 0.888851162  |
| O | -0.632463324 | 3.449479157  | -0.724869954 |
| C | -2.036610235 | -0.399464191 | 0.511424136  |
| C | -0.942898167 | -0.166867121 | -0.558222942 |
| N | -0.856144229 | 1.232489982  | -0.940236966 |
| S | 1.722556042  | -0.494439015 | -1.277291991 |
| C | 0.370977958  | -0.808994102 | -0.091751907 |
| O | -2.379372304 | 0.507224857  | 1.264019188  |
| N | -2.581851215 | -1.629560306 | 0.588088139  |
| C | 2.992178180  | -1.450323024 | -0.488435936 |
| H | 3.282729172  | -0.929143971 | 0.665985147  |
| H | 2.705310209  | -2.478617111 | -0.271434920 |
| H | 3.912066244  | -1.391914974 | -1.065720979 |
| C | -2.304110139 | -2.820912377 | -0.201503916 |
| H | -1.532113051 | -3.442235387 | 0.257620117  |
| H | -3.218020172 | -3.406974466 | -0.278088921 |
| H | -1.992205125 | -2.561297346 | -1.210217986 |
| C | 3.603914166  | -0.355555913 | 1.918835240  |
| H | 2.748357117  | -0.581827972 | 2.547734285  |
| H | 4.521488259  | -0.853394905 | 2.216444260  |
| H | 3.719899124  | 0.697982167  | 1.683132221  |

### 20-TS-CH<sub>3</sub>

|   |              |              |              |
|---|--------------|--------------|--------------|
| N | -0.775513058 | 0.582968042  | -0.495766036 |
| H | -4.816494346 | 2.086518148  | -0.322064023 |
| H | 3.988853286  | -2.246372160 | -0.693349051 |
| O | -2.907602210 | -2.432881173 | -0.282079020 |
| H | -4.355388315 | -2.046441147 | 1.270446094  |
| C | -2.244083161 | -1.289833095 | 0.236811017  |
| C | 4.617583334  | 0.068224005  | -0.265444019 |
| H | 4.948254354  | -0.683180047 | 0.756782057  |
| C | -3.961223286 | 0.350844025  | -0.146683010 |
| N | 3.190377227  | 0.178666013  | -0.317582023 |
| H | -1.850783135 | 2.354944170  | 0.052707004  |
| O | 3.329594242  | 2.327269168  | 0.531820040  |
| N | 0.268570019  | 2.410764173  | 0.270064019  |
| O | -4.196283301 | -1.220290086 | 1.750434126  |
| H | -1.394847103 | -1.564338115 | 0.862475062  |
| C | 2.429575175  | -0.902940067 | -0.724945055 |

|   |              |              |              |
|---|--------------|--------------|--------------|
| H | -2.262948161 | -3.124271225 | -0.469028034 |
| H | -2.804689199 | 0.243854017  | 1.649248118  |
| C | 1.194723083  | 1.421602103  | -0.008658001 |
| C | 0.560484042  | 0.283708020  | -0.481724035 |
| C | -1.844226132 | -0.335045024 | -0.898412066 |
| C | 2.610274188  | 1.424259102  | 0.121786009  |
| N | 3.087354222  | -2.036148147 | -1.086303079 |
| H | -1.492861106 | -0.883603062 | -1.771376126 |
| C | -0.887352066 | 1.879350134  | -0.028651002 |
| O | -4.239400304 | 1.640462119  | 0.310174022  |
| H | -4.864331350 | -0.135665010 | -0.522133038 |
| O | -3.008597217 | 0.383431028  | -1.226857086 |
| H | 5.039426365  | -0.413010030 | -1.143074082 |
| H | 2.492183178  | -2.833092206 | -1.246994090 |
| C | -3.298238235 | -0.461348033 | 0.978811072  |
| N | 1.117733080  | -0.887411064 | -0.828106058 |
| H | 5.064382364  | 1.028677074  | -0.048354003 |
| C | 5.227668376  | -1.478563108 | 1.870932136  |
| H | 4.245122308  | -1.753987128 | 2.241637161  |
| H | 5.808244405  | -2.305444168 | 1.473713108  |
| H | 5.783408423  | -0.811938058 | 2.522342180  |

### 21A-TS-CH<sub>3</sub>

|   |              |              |              |
|---|--------------|--------------|--------------|
| C | -0.441441174 | -0.690109851 | -0.145071059 |
| P | 1.239715585  | -0.048433839 | -0.049454606 |
| O | -1.512128810 | 1.528305012  | -0.155235839 |
| O | 2.209209608  | -1.057399100 | -0.823192013 |
| H | -0.486955830 | -1.659544283 | 0.353447945  |
| H | -0.608525726 | 1.788726895  | -0.411648620 |
| O | 1.336717077  | 1.356244850  | -0.516862831 |
| H | -0.652112665 | -0.845148058 | -1.207067603 |
| O | 1.624619579  | -0.309707074 | 1.472077247  |
| H | -1.412704289 | 0.325184397  | 1.543398354  |
| H | -2.614341841 | -0.266696555 | 0.218627379  |
| C | -1.456653577 | 0.266943831  | 0.451662843  |
| H | 2.437636963  | 0.129195601  | 1.760541714  |
| H | 2.357433663  | -0.812170103 | -1.747190148 |
| C | -3.866716727 | -0.804119258 | -0.135866203 |
| H | -3.903527069 | -1.754895334 | 0.387007001  |
| H | -3.814060601 | -0.888018020 | -1.216972457 |
| H | -4.577047150 | -0.065964809 | 0.223029530  |

### 21B-TS-CH<sub>3</sub>

|   |              |              |              |
|---|--------------|--------------|--------------|
| C | -0.412878983 | -0.764777078 | -0.041692625 |
| P | 1.317893703  | -0.162328623 | -0.133311123 |
| O | -1.365070368 | 1.492073061  | -0.236580312 |

|   |              |              |              |
|---|--------------|--------------|--------------|
| O | 2.220839299  | -1.239901977 | -0.636314115 |
| H | -0.453813077 | -1.652563593 | 0.592203879  |
| H | -0.450113987 | 1.586400064  | -0.597544150 |
| O | 1.263490085  | 1.183904510  | -0.824219024 |
| H | -0.679311582 | -1.070762466 | -1.058655621 |
| O | 1.717289771  | 0.090883322  | 1.440582172  |
| H | -1.368074517 | 0.416309523  | 1.541151727  |
| H | -2.567900071 | -0.210996902 | 0.254358764  |
| C | -1.397628538 | 0.273115294  | 0.454237598  |
| H | 1.433319305  | 0.966453650  | 1.730531199  |
| C | -3.867265976 | -0.731291858 | -0.077529838 |
| H | -3.955077480 | -1.632004417 | 0.522574531  |
| H | -3.802453299 | -0.909813285 | -1.146585358 |
| H | -4.550730170 | 0.063957305  | 0.203791278  |

### 21C-TS-CH<sub>3</sub>

|   |              |              |              |
|---|--------------|--------------|--------------|
| C | -0.386371240 | -0.777721426 | 0.040876134  |
| P | 1.370148173  | -0.132717604 | -0.015403713 |
| O | -1.297768494 | 1.483707435  | -0.162569005 |
| O | 2.187852681  | -1.182654429 | -0.760673145 |
| H | -0.438464850 | -1.659228544 | 0.685450143  |
| H | -0.347618946 | 1.520319643  | -0.514397603 |
| O | 1.195230538  | 1.186692829  | -0.817192196 |
| H | -0.635113978 | -1.098585405 | -0.977021341 |
| O | 1.804013111  | 0.103859348  | 1.429186213  |
| H | -1.413886567 | 0.380749872  | 1.592043724  |
| H | -2.546585896 | -0.199540368 | 0.248031824  |
| C | -1.391782251 | 0.254454997  | 0.500405941  |
| C | -3.879331487 | -0.697899128 | -0.148698516 |
| H | -3.788899175 | -0.807850259 | -1.225287144 |
| H | -4.564073793 | 0.083636092  | 0.166592344  |
| H | -3.987292171 | -1.634585098 | 0.390127490  |

### 22A-TS-CH<sub>3</sub>

|   |              |              |              |
|---|--------------|--------------|--------------|
| H | -3.790056274 | 0.789423059  | -1.156298084 |
| H | -3.813509273 | -0.051695004 | 0.294831021  |
| C | -1.954516143 | 0.001425000  | -0.456347033 |
| N | -3.299358239 | 0.661204046  | -0.273818020 |
| C | -0.948457068 | 0.614324043  | 0.500235036  |
| C | -2.193229159 | -1.516733107 | -0.137298010 |
| O | -3.255427235 | -1.750553128 | 0.498714036  |
| H | -1.251081090 | 0.454994033  | 1.536370113  |
| H | -1.653963119 | 0.122223009  | -1.492551109 |
| H | -1.065941074 | 1.873271136  | 0.359280026  |
| O | -1.315064097 | -2.303601166 | -0.513552037 |
| C | 0.479395034  | 0.298181022  | 0.278302020  |

|   |              |              |              |
|---|--------------|--------------|--------------|
| C | 1.292640094  | -0.104353007 | 1.341788098  |
| C | 1.082168077  | 0.457820033  | -0.977417071 |
| C | 2.646933190  | -0.357604026 | 1.165305083  |
| H | 0.858380061  | -0.230589016 | 2.326145169  |
| C | 2.430770174  | 0.209533015  | -1.168106082 |
| H | 0.491324035  | 0.789149056  | -1.822156133 |
| C | 3.220758230  | -0.203550015 | -0.094836007 |
| H | 3.256078234  | -0.676309051 | 2.003225146  |
| H | 2.887293207  | 0.335060024  | -2.141323152 |
| O | 4.543566328  | -0.436884031 | -0.340037024 |
| H | 4.988798359  | -0.713216053 | 0.470800034  |
| C | -1.185148087 | 3.324796239  | 0.173333012  |
| H | -1.485022107 | 3.428661245  | -0.864384064 |
| H | -0.165440012 | 3.625390258  | 0.387650028  |
| H | -1.919566139 | 3.649359262  | 0.903596066  |
| H | -3.254261235 | 1.561122114  | 0.200767015  |

### 22B-TS-CH<sub>3</sub>

|   |              |              |              |
|---|--------------|--------------|--------------|
| H | -4.106642295 | 0.204403015  | -0.710700053 |
| H | -3.701887264 | 0.194432014  | 0.851161062  |
| C | -2.103672154 | 0.024286002  | -0.369726027 |
| N | -3.429904245 | 0.577179039  | -0.051576004 |
| C | -1.056459075 | 0.712974049  | 0.494321036  |
| C | -2.019298143 | -1.520464108 | -0.148149011 |
| O | -2.495484181 | -1.948322139 | 0.934172066  |
| H | -1.337968094 | 0.655971050  | 1.547501113  |
| H | -1.901394134 | 0.220269016  | -1.423840105 |
| H | -1.175075087 | 1.943085142  | 0.228357017  |
| O | -1.479268104 | -2.198950157 | -1.055182075 |
| C | 0.370045027  | 0.371438027  | 0.290910021  |
| C | 1.206853085  | 0.096019007  | 1.377423100  |
| C | 0.953067069  | 0.370444026  | -0.984909072 |
| C | 2.558991187  | -0.181464013 | 1.209154086  |
| H | 0.791464058  | 0.091622007  | 2.378347172  |
| C | 2.299187166  | 0.098301007  | -1.169366084 |
| H | 0.342328025  | 0.590201043  | -1.851109135 |
| C | 3.109817225  | -0.181763013 | -0.069628005 |
| H | 3.183231228  | -0.399296029 | 2.068480147  |
| H | 2.736992200  | 0.100626007  | -2.159544153 |
| O | 4.431697320  | -0.446333032 | -0.308389022 |
| H | 4.889436350  | -0.616783045 | 0.524076037  |
| C | -1.250034092 | 3.363856241  | -0.137691010 |
| H | -1.470159106 | 3.321129237  | -1.199206088 |
| H | -0.256789019 | 3.723924269  | 0.110066008  |
| H | -2.050761149 | 3.757244269  | 0.478601034  |

**22C-TS-CH<sub>3</sub>**

|   |              |              |              |
|---|--------------|--------------|--------------|
| H | -4.021163415 | 0.318960256  | -0.866427112 |
| H | -3.682388390 | 0.376348246  | 0.745775006  |
| C | -1.968418280 | 0.043341151  | -0.436900079 |
| N | -3.333097353 | 0.634919251  | -0.180234060 |
| C | -0.956902181 | 0.685067157  | 0.504812989  |
| C | -1.997272347 | -1.468128955 | -0.241397064 |
| O | -2.882610428 | -1.825870947 | 0.696929003  |
| H | -1.256606209 | 0.557776157  | 1.544982065  |
| H | -1.731770257 | 0.243452156  | -1.478412154 |
| H | -1.092490140 | 1.941168250  | 0.303717975  |
| O | -1.263354325 | -2.214964040 | -0.827650109 |
| C | 0.467190907  | 0.351484072  | 0.284696973  |
| C | 1.281268954  | 0.009491013  | 1.369228050  |
| C | 1.060775955  | 0.426032053  | -0.983250117 |
| C | 2.631699035  | -0.262244062 | 1.202332038  |
| H | 0.851087919  | -0.050713973 | 2.361342124  |
| C | 2.405730036  | 0.155851977  | -1.163411131 |
| H | 0.470294922  | 0.706937100  | -1.846133181 |
| C | 3.199044082  | -0.191931081 | -0.068976052 |
| H | 3.243093071  | -0.530860107 | 2.055738098  |
| H | 2.857670071  | 0.214082963  | -2.144772202 |
| O | 4.515842165  | -0.447860154 | -0.305806069 |
| H | 4.967742189  | -0.671371187 | 0.517748990  |
| C | -1.202545085 | 3.364594358  | 0.031262955  |
| H | -1.355445099 | 3.412536367  | -1.042197124 |
| H | -0.222871004 | 3.684981342  | 0.368119979  |
| H | -2.031431135 | 3.712592419  | 0.638941999  |
| H | -2.850717465 | -2.787502014 | 0.835131013  |
| H | -3.295769311 | 1.655392321  | -0.230091064 |

**22D-TS-CH<sub>3</sub>**

|   |              |              |              |
|---|--------------|--------------|--------------|
| H | 3.965095181  | -0.032863971 | -1.417068065 |
| H | 3.590855156  | -0.869265031 | -0.067638967 |
| C | 1.959787034  | -0.028379977 | -0.978542033 |
| N | 3.279116135  | -0.658506020 | -1.009406036 |
| C | 0.920785966  | -1.041065055 | -0.491890997 |
| C | 1.930006028  | 1.283355118  | -0.197684976 |
| O | 2.449261066  | 1.160617112  | 1.038026112  |
| H | 1.358068998  | -1.495366083 | 0.647606085  |
| H | 1.698855019  | 0.254717043  | -2.002028105 |
| H | 0.991324971  | -1.921437114 | -1.129826045 |
| O | 1.506552996  | 2.329722191  | -0.628332005 |
| C | -0.483534138 | -0.606751025 | -0.292124983 |
| C | -0.853425168 | 0.263967035  | 0.740405090  |
| C | -1.503675209 | -1.099002063 | -1.116985041 |



|   |              |              |              |
|---|--------------|--------------|--------------|
| C | -2.173642261 | 0.648863061  | 0.927653105  |
| H | -0.103064114 | 0.634593067  | 1.426476143  |
| C | -2.827428306 | -0.723317041 | -0.942147031 |
| H | -1.253668190 | -1.786291113 | -1.916426102 |
| C | -3.167210334 | 0.158485020  | 0.081620044  |
| H | -2.435203282 | 1.321830104  | 1.735956165  |
| H | -3.605043361 | -1.106648071 | -1.590147079 |
| O | -4.483844431 | 0.498497041  | 0.213841053  |
| H | -4.598111437 | 1.104214083  | 0.956968106  |
| H | 2.417981061  | 2.027255175  | 1.475306143  |
| C | 1.800982032  | -2.030868122 | 1.878458174  |
| H | 2.128200054  | -1.156807057 | 2.430419213  |
| H | 0.905497967  | -2.505444159 | 2.266978200  |
| H | 2.593768091  | -2.721357171 | 1.608417156  |

### 23A-TS-CH<sub>3</sub>

|   |              |              |              |
|---|--------------|--------------|--------------|
| C | -1.182084087 | -0.322810023 | 0.252067018  |
| N | -2.135848152 | -1.422038103 | 0.336793024  |
| C | 0.187143013  | -0.878952065 | -0.169291012 |
| C | 1.308989094  | 0.133145010  | -0.176490013 |
| C | 2.663085194  | -0.419978030 | -0.383773028 |
| O | 3.560242258  | 0.542408040  | -0.698468052 |
| H | -1.097444081 | 0.124582009  | 1.245695087  |
| H | 0.084485006  | -1.317353095 | -1.168360081 |
| H | 0.437839032  | -1.694312122 | 0.509497037  |
| O | 2.981987216  | -1.582940113 | -0.244947018 |
| C | -1.629371120 | 0.765413054  | -0.745830056 |
| O | -2.029646146 | 0.442282032  | -1.846132133 |
| H | 1.379565099  | 0.622480046  | 1.012014071  |
| H | 1.143797081  | 1.025294075  | -0.775649056 |
| H | 4.435322317  | 0.128045009  | -0.769096053 |
| C | -3.445099247 | -1.038379073 | 0.863991060  |
| H | -3.328874238 | -0.664828048 | 1.883441135  |
| H | -3.959883287 | -0.265309019 | 0.276167020  |
| H | -4.088281294 | -1.917964140 | 0.898976063  |
| H | -2.249546159 | -1.819632132 | -0.590451043 |
| C | 1.423740101  | 1.113616081  | 2.353799168  |
| H | 0.739627051  | 1.954553143  | 2.347086168  |
| H | 2.471759180  | 1.371261101  | 2.459335178  |
| H | 1.096311080  | 0.254167018  | 2.928387212  |
| C | -1.576362112 | 2.197458158  | -0.297126021 |
| H | -1.786572128 | 2.873099207  | -1.123470081 |
| H | -2.320517168 | 2.337795171  | 0.493023035  |
| H | -0.607567042 | 2.431308173  | 0.148148011  |

### 23B-TS-CH<sub>3</sub>

|   |              |              |              |
|---|--------------|--------------|--------------|
| C | -1.136667079 | -0.341604025 | 0.239620017  |
| N | -2.088298152 | -1.447385106 | 0.273333020  |
| C | 0.237208017  | -0.861158062 | -0.219688016 |
| C | 1.355294098  | 0.154127011  | -0.214904015 |
| C | 2.771512199  | -0.358599026 | -0.435732032 |
| O | 3.610204258  | 0.487679035  | -0.847465061 |
| H | -1.045423073 | 0.053424004  | 1.254923092  |
| H | 0.117471009  | -1.271723093 | -1.230740088 |
| H | 0.510971037  | -1.696541123 | 0.424832031  |
| O | 3.003795214  | -1.563924113 | -0.157187011 |
| C | -1.591080113 | 0.796026058  | -0.691925050 |
| O | -2.035695145 | 0.536274040  | -1.793393127 |
| H | 1.411356099  | 0.619812045  | 0.986607070  |
| H | 1.163247086  | 1.049857076  | -0.804269058 |
| C | -3.398747246 | -1.091686076 | 0.815543057  |
| H | -3.285744239 | -0.771457057 | 1.853587134  |
| H | -3.911712282 | -0.287989021 | 0.268062019  |
| H | -4.043815292 | -1.970897142 | 0.803566056  |
| H | -2.200569159 | -1.799612129 | -0.672101049 |
| C | 1.462213107  | 1.069944078  | 2.342943171  |
| H | 0.760531055  | 1.895802138  | 2.396713173  |
| H | 2.503224181  | 1.354783098  | 2.455690178  |
| H | 1.169032084  | 0.193283014  | 2.911621210  |
| C | -1.488749108 | 2.205948161  | -0.182687013 |
| H | -1.673251122 | 2.923064208  | -0.980063068 |
| H | -2.234376161 | 2.337222167  | 0.607927042  |
| H | -0.515194037 | 2.384444172  | 0.275657020  |

### 24-TS-CH<sub>3</sub>

|   |              |              |              |
|---|--------------|--------------|--------------|
| H | -1.243501129 | -1.785244094 | 0.336795995  |
| C | -3.489754282 | -0.753893992 | -0.237630046 |
| H | -4.114934317 | -0.271704949 | 0.515371008  |
| H | -3.966709314 | -0.610528975 | -1.206999117 |
| H | -3.430767291 | -1.819024071 | -0.018963030 |
| C | -2.145697172 | -0.063063959 | -0.255848048 |
| H | 0.796036023  | -1.147289074 | 1.021880046  |
| H | 0.905442080  | 2.836972213  | 1.135365054  |
| O | -2.033733151 | 1.117376124  | -0.579675073 |
| C | 0.355188018  | 0.959887085  | 0.972858039  |
| C | 0.275237996  | -0.338695008 | 0.173644983  |
| N | -1.084354109 | -0.815139025 | 0.117416979  |
| C | 1.102073053  | -0.569535037 | -1.097341108 |
| O | 0.022260994  | 0.921928084  | 2.159599124  |
| N | 0.861257071  | 2.101122160  | 0.445396003  |
| H | 0.789216039  | 0.158961021  | -1.848835160 |
| C | 0.838787014  | -1.958633131 | -1.690266149 |

|   |              |              |              |
|---|--------------|--------------|--------------|
| H | 1.083140023  | -2.747265192 | -0.974920100 |
| H | -0.201279060 | -2.081502130 | -1.991668175 |
| H | 1.463094061  | -2.105582150 | -2.572971213 |
| C | 2.599908161  | -0.393254041 | -0.821138091 |
| H | 2.960923178  | -1.190572101 | -0.167897041 |
| H | 3.163412202  | -0.444703052 | -1.753702156 |
| H | 2.827273193  | 0.557040024  | -0.339136054 |
| C | 1.255158046  | -2.090425148 | 2.006372116  |
| H | 0.366211980  | -2.239327149 | 2.608846161  |
| H | 2.046643108  | -1.529368113 | 2.489883152  |
| H | 1.582034056  | -2.955898212 | 1.441155076  |
| C | 0.875880075  | 2.543880192  | -0.945230097 |
| H | 0.880255090  | 3.631955268  | -0.944643097 |
| H | 1.764668137  | 2.205600159  | -1.478324136 |
| H | -0.018386994 | 2.203563181  | -1.462850136 |

### 25-TS-CH<sub>3</sub>

|   |              |              |              |
|---|--------------|--------------|--------------|
| H | 3.049059221  | 2.725572195  | 0.540624041  |
| H | -2.525151180 | 0.983940069  | 1.266536093  |
| H | -1.914666138 | 2.565296185  | 0.757781053  |
| H | -2.029626149 | -1.758991129 | -1.452550103 |
| H | 0.351483025  | -2.873145209 | -1.722135124 |
| H | 3.131571226  | -0.820396057 | -0.641148049 |
| H | 3.346726239  | -1.398424103 | 0.893237062  |
| H | -0.523284037 | 1.440824102  | -0.989545072 |
| H | -1.348372095 | -1.126083079 | 0.759559057  |
| H | 0.755413054  | -0.767831055 | -1.624365119 |
| H | 1.039343075  | -1.382944102 | 1.353174098  |
| H | 1.993094143  | 0.862772063  | 1.604484115  |
| C | 2.357909171  | 2.583394185  | -0.294634021 |
| O | 2.014294143  | 1.198999084  | -0.430029031 |
| O | -3.105017222 | 1.670160118  | -0.619260045 |
| C | -2.138839152 | 1.554917114  | 0.415452030  |
| O | -1.926379138 | -0.804777057 | -1.335582098 |
| O | 0.288009021  | -2.614407189 | -0.795855055 |
| N | 2.711748196  | -1.398270102 | 0.092944007  |
| O | 0.126836009  | 1.128906081  | 0.965246068  |
| C | -0.839008062 | 0.920277067  | -0.076373005 |
| C | -0.955687068 | -0.567718043 | -0.358437026 |
| C | 0.384944028  | -1.196781086 | -0.686527051 |
| C | 1.416290100  | 0.637272048  | 0.702037051  |
| H | -3.234755233 | 0.789396055  | -0.997574072 |
| H | 2.840218202  | 2.873998205  | -1.224129087 |
| H | 1.464006103  | 3.189010230  | -0.137749010 |
| C | 1.352725096  | -0.872453065 | 0.445454032  |
| C | -1.821179129 | -1.754789128 | 1.934906141  |

|   |              |              |              |
|---|--------------|--------------|--------------|
| H | -1.433500103 | -1.141026082 | 2.741644197  |
| H | -2.899431210 | -1.715586122 | 1.817369132  |
| H | -1.399129099 | -2.753232200 | 1.882907137  |
| H | 2.629903187  | -2.361021168 | -0.246159018 |

### 26-TS-CH<sub>3</sub>

|   |              |              |              |
|---|--------------|--------------|--------------|
| N | -1.296616078 | -0.116039957 | -0.372946106 |
| N | -2.171415208 | -2.031338063 | 0.403650950  |
| N | -5.283131364 | -0.042471812 | 0.102661929  |
| N | -3.340708181 | 1.199665207  | -0.577130122 |
| N | -5.205148434 | -2.227811971 | 0.876215986  |
| C | -0.322491975 | 0.865427078  | -0.855880138 |
| C | -0.056164916 | 1.978594152  | 0.163974933  |
| C | 1.196121154  | 1.453408069  | 0.888329985  |
| C | 1.942095183  | 0.745769989  | -0.244363096 |
| C | -1.076028108 | -1.408182057 | 0.045378924  |
| C | -3.174664251 | -1.102416960 | 0.210533936  |
| C | -2.651115167 | 0.093418106  | -0.275770098 |
| C | -4.569270350 | -1.142732916 | 0.401186950  |
| C | -4.644110280 | 1.038872245  | -0.358716104 |
| O | 0.242290147  | 3.162995226  | -0.552697119 |
| O | 2.005529248  | 2.486129115  | 1.421050023  |
| O | 0.904893090  | 0.208185989  | -1.087472159 |
| H | -0.711760990 | 1.286637123  | -1.783759207 |
| H | 0.880652211  | 3.661514236  | -0.020975080 |
| H | -0.906946970 | 2.124950191  | 0.832980982  |
| H | 1.715824236  | 2.687206140  | 2.318784086  |
| H | 0.906996110  | 0.737611028  | 1.661970042  |
| H | 2.504479252  | 1.496637024  | -0.808779135 |
| H | -4.700917426 | -3.079990049 | 1.047103999  |
| H | -6.208706485 | -2.231351934 | 0.939573986  |
| H | -0.085665052 | -1.829399125 | 0.044738924  |
| H | -5.274619294 | 1.893036330  | -0.582174123 |
| C | 2.866492212  | -0.352842120 | 0.227972938  |
| H | 3.590694281  | 0.084478886  | 0.917406989  |
| H | 2.303716145  | -1.124124155 | 0.756668977  |
| S | 3.783237249  | -1.117198209 | -1.154015160 |
| C | 4.873361295  | -2.159403318 | -0.219870095 |
| H | 5.680287388  | -1.434390296 | 0.493639957  |
| H | 4.360829231  | -2.799022346 | 0.497922957  |
| H | 5.512471312  | -2.727204384 | -0.892304144 |
| C | 6.552615445  | -0.635364268 | 1.272220012  |
| H | 7.515130493  | -1.131865341 | 1.197728006  |
| H | 6.118406462  | -0.646851256 | 2.267151082  |
| H | 6.503726505  | 0.327504802  | 0.772360977  |

**27-TS-CH<sub>3</sub>**

|   |              |              |              |
|---|--------------|--------------|--------------|
| H | 0.726927167  | 1.105312078  | 1.709637217  |
| C | 1.847522308  | 2.347441114  | -1.199278993 |
| H | 0.981389260  | 2.669637175  | -1.782172035 |
| H | 2.610722401  | 3.118117132  | -1.280046999 |
| H | 2.226955292  | 1.418394024  | -1.612452021 |
| C | 1.444361276  | 2.240067124  | 0.251011113  |
| H | 0.022151001  | -1.330481067 | -1.528615015 |
| H | 0.363592045  | -0.918820051 | 1.092890172  |
| H | 3.316140180  | -2.485357305 | -0.508449942 |
| H | 0.213640096  | 0.372125048  | -1.822815038 |
| O | 1.503805328  | 3.219497190  | 0.992646167  |
| C | 2.276359184  | -0.860043138 | -0.075267911 |
| C | 0.897231117  | -0.240823029 | 0.117972103  |
| N | 0.953922183  | 1.062449060  | 0.726220144  |
| C | -0.079463960 | -0.353878990 | -1.062231981 |
| O | 3.292274291  | -0.173949139 | 0.042954098  |
| N | 2.365760130  | -2.177963236 | -0.361139931 |
| C | -1.520445053 | -0.126054904 | -0.671891956 |
| C | -2.370098166 | -1.209519943 | -0.443824938 |
| C | -2.027425025 | 1.164172215  | -0.506510942 |
| C | -3.688552252 | -1.012669864 | -0.046885909 |
| H | -1.998710185 | -2.218415032 | -0.578753945 |
| C | -3.344644111 | 1.366288290  | -0.108484913 |
| H | -1.389168941 | 2.018671243  | -0.690689956 |
| C | -4.179224225 | 0.277604252  | 0.126420103  |
| H | -4.331639338 | -1.866769897 | 0.124766103  |
| H | -3.719906094 | 2.374537381  | 0.014861096  |
| H | -5.205095289 | 0.433848312  | 0.435134126  |
| C | -0.213562021 | -1.427503059 | 2.288951259  |
| H | -0.739864017 | -0.570231974 | 2.695177291  |
| H | -0.862693105 | -2.227362086 | 1.952918234  |
| H | 0.657066028  | -1.744704126 | 2.853312302  |
| C | 1.339088008  | -3.206045261 | -0.434129937 |
| H | 0.465790956  | -2.928785201 | 0.145672105  |
| H | 1.031876977  | -3.402224264 | -1.463936013 |
| H | 1.737529991  | -4.127485348 | -0.011883906 |

**28-TS-CH<sub>3</sub>**

|   |              |              |              |
|---|--------------|--------------|--------------|
| H | 1.241897087  | -0.081104006 | 1.782671128  |
| C | 2.376674172  | -0.144437010 | -1.366181100 |
| H | 2.185450158  | 0.862982062  | -1.737418123 |
| H | 3.357106241  | -0.468319034 | -1.705076122 |
| H | 1.612179114  | -0.804997057 | -1.771026128 |
| C | 2.368039169  | -0.145713011 | 0.142892010  |
| H | -0.841115061 | 0.231883017  | 1.278527090  |

|   |              |              |              |
|---|--------------|--------------|--------------|
| H | -2.063316149 | -2.555414181 | -0.837093060 |
| O | 3.406637247  | -0.252765018 | 0.793254059  |
| C | -0.585968043 | -1.410824102 | -0.182769013 |
| C | -0.151651011 | -0.004004000 | 0.219938016  |
| N | 1.176011085  | 0.013818001  | 0.779005056  |
| O | 0.213051016  | -2.347551167 | -0.152712011 |
| N | -1.869543136 | -1.606422115 | -0.553893039 |
| C | -0.459438033 | 1.079277076  | -0.790724057 |
| C | -1.355954099 | 2.254517161  | -0.464623033 |
| C | 0.118441009  | 2.458471179  | -0.627060043 |
| H | -0.540314038 | 0.722114052  | -1.810892130 |
| H | -1.766090126 | 2.311690164  | 0.534094036  |
| H | -2.020370145 | 2.601444188  | -1.244385088 |
| H | 0.480408035  | 2.959576210  | -1.514797107 |
| H | 0.703014050  | 2.639957190  | 0.264886019  |
| C | -2.977853215 | -0.665148047 | -0.619343046 |
| H | -2.924846212 | 0.058996004  | 0.187530013  |
| H | -3.003106214 | -0.125979009 | -1.567711112 |
| H | -3.904442281 | -1.225434086 | -0.510537036 |
| C | -1.372561099 | 0.464393033  | 2.600077186  |
| H | -1.109756082 | -0.452310032 | 3.117427223  |
| H | -0.833570062 | 1.348189095  | 2.923835209  |
| H | -2.434281175 | 0.608298043  | 2.436607174  |

Cartesian Coordinates of all the transition states between substrates and 5'-dAdo<sup>•</sup> radical.

### 1A-TS-Ado

|   |              |              |              |
|---|--------------|--------------|--------------|
| N | 11.673095000 | 1.401737000  | 3.232226000  |
| N | 10.237344000 | 2.824514000  | 2.256898000  |
| N | 13.010919000 | 3.016220000  | -0.192329000 |
| N | 13.504378000 | 1.522033000  | 1.624870000  |
| N | 11.030779000 | 4.211337000  | -0.371620000 |
| C | 12.243777000 | 0.452352000  | 4.190705000  |
| C | 13.290816000 | 1.100396000  | 5.104694000  |
| C | 12.450292000 | 1.464343000  | 6.341553000  |
| C | 11.451006000 | 0.301137000  | 6.402463000  |
| C | 10.153764000 | 0.587991000  | 7.083415000  |
| C | 10.446674000 | 2.023398000  | 3.272581000  |
| C | 11.389336000 | 2.729790000  | 1.501444000  |
| C | 12.293111000 | 1.848163000  | 2.090546000  |
| C | 11.797962000 | 3.331640000  | 0.295935000  |
| C | 13.775749000 | 2.150366000  | 0.483041000  |
| O | 14.256976000 | 0.116881000  | 5.429707000  |
| O | 13.210393000 | 1.503061000  | 7.536307000  |
| O | 11.208889000 | -0.032753000 | 5.016041000  |

|   |              |              |              |
|---|--------------|--------------|--------------|
| H | 12.693040000 | -0.359289000 | 3.616710000  |
| H | 14.553137000 | 0.302116000  | 6.333567000  |
| H | 13.755847000 | 1.969235000  | 4.632643000  |
| H | 13.577467000 | 2.387575000  | 7.651563000  |
| H | 11.925316000 | 2.407880000  | 6.174124000  |
| H | 11.957435000 | -0.544224000 | 6.882093000  |
| H | 9.563502000  | 1.376119000  | 6.620928000  |
| H | 10.245239000 | 0.708627000  | 8.160279000  |
| H | 10.095788000 | 4.409360000  | -0.061294000 |
| H | 11.336698000 | 4.566997000  | -1.261063000 |
| H | 9.752004000  | 1.827232000  | 4.071010000  |
| H | 14.741830000 | 1.936230000  | 0.038142000  |
| H | -0.891979000 | -2.173157000 | 4.988482000  |
| H | 1.894096000  | -4.167297000 | 5.507217000  |
| H | 2.476140000  | -2.852477000 | 4.523010000  |
| H | 3.395585000  | -1.717194000 | 6.580103000  |
| H | 2.816401000  | -3.042689000 | 7.565506000  |
| H | 4.290262000  | -4.629841000 | 6.297084000  |
| H | 4.870646000  | -3.300169000 | 5.312629000  |
| H | 5.775641000  | -2.181391000 | 7.357644000  |
| H | 5.203372000  | -3.510236000 | 8.344365000  |
| H | 6.663150000  | -5.098120000 | 7.100600000  |
| H | 7.252059000  | -3.796546000 | 6.083543000  |
| H | 7.750296000  | -1.291169000 | 6.333479000  |
| H | 9.283113000  | -2.205515000 | 6.033197000  |
| H | 9.392021000  | -0.520308000 | 6.930485000  |
| H | 9.120957000  | -5.548098000 | 8.023740000  |
| H | 7.540669000  | -3.916119000 | 9.116208000  |
| H | 7.999839000  | -1.657929000 | 8.781203000  |
| H | 10.605439000 | -1.897610000 | 8.716885000  |
| O | 0.599882000  | -1.581661000 | 6.642162000  |
| O | -0.079506000 | -2.672437000 | 4.804582000  |
| C | 0.833524000  | -2.361537000 | 5.748808000  |
| C | 2.127763000  | -3.098610000 | 5.530699000  |
| C | 3.196777000  | -2.792184000 | 6.571622000  |
| C | 4.494619000  | -3.553537000 | 6.309981000  |
| C | 5.576731000  | -3.257622000 | 7.346144000  |
| C | 6.872687000  | -4.023902000 | 7.083018000  |
| C | 8.684833000  | -1.653026000 | 6.754124000  |
| O | 11.377883000 | -4.374530000 | 8.591026000  |
| C | 10.262452000 | -3.894536000 | 8.420460000  |
| N | 9.158353000  | -4.545657000 | 7.926493000  |
| C | 7.952118000  | -3.737594000 | 8.114160000  |
| C | 8.567994000  | -2.302180000 | 8.110259000  |
| N | 9.884175000  | -2.600719000 | 8.689505000  |

**1B-TS- Ado**

|   |              |              |              |
|---|--------------|--------------|--------------|
| N | 12.046517000 | 1.142380000  | 3.327314000  |
| N | 10.770866000 | 2.638231000  | 2.244813000  |
| N | 13.676837000 | 2.570951000  | -0.052903000 |
| N | 13.964216000 | 1.091779000  | 1.820076000  |
| N | 11.799197000 | 3.896229000  | -0.366895000 |
| C | 12.497221000 | 0.182734000  | 4.337699000  |
| C | 13.523459000 | 0.787450000  | 5.303647000  |
| C | 12.631783000 | 1.229516000  | 6.477487000  |
| C | 11.562424000 | 0.128961000  | 6.497417000  |
| C | 10.246066000 | 0.505925000  | 7.092194000  |
| C | 10.867892000 | 1.850481000  | 3.287467000  |
| C | 11.951336000 | 2.442933000  | 1.555523000  |
| C | 12.756694000 | 1.514681000  | 2.211848000  |
| C | 12.465552000 | 2.983787000  | 0.361510000  |
| C | 14.340176000 | 1.670200000  | 0.681489000  |
| O | 14.405416000 | -0.244506000 | 5.708180000  |
| O | 13.316921000 | 1.250002000  | 7.717161000  |
| O | 11.385261000 | -0.220366000 | 5.105316000  |
| H | 12.930690000 | -0.667017000 | 3.808485000  |
| H | 14.655859000 | -0.056534000 | 6.625219000  |
| H | 14.069264000 | 1.615706000  | 4.845253000  |
| H | 13.729010000 | 2.113442000  | 7.839249000  |
| H | 12.175984000 | 2.198288000  | 6.259117000  |
| H | 11.988500000 | -0.733830000 | 7.022267000  |
| H | 9.726838000  | 1.307050000  | 6.570582000  |
| H | 10.283364000 | 0.659608000  | 8.168094000  |
| H | 10.872667000 | 4.181936000  | -0.103398000 |
| H | 12.183515000 | 4.219920000  | -1.237844000 |
| H | 10.119026000 | 1.723770000  | 4.050077000  |
| H | 15.310448000 | 1.376926000  | 0.294583000  |
| H | 1.856835000  | -3.930758000 | 5.344948000  |
| H | 2.503075000  | -2.620775000 | 4.393797000  |
| H | 3.413664000  | -1.555629000 | 6.482725000  |
| H | 2.759987000  | -2.866524000 | 7.432961000  |
| H | 4.211759000  | -4.494677000 | 6.192953000  |
| H | 4.861062000  | -3.181992000 | 5.230272000  |
| H | 5.756641000  | -2.104083000 | 7.298976000  |
| H | 5.113738000  | -3.412799000 | 8.267887000  |
| H | 6.551386000  | -5.049386000 | 7.066349000  |
| H | 7.205851000  | -3.772565000 | 6.058140000  |
| H | 7.781612000  | -1.284174000 | 6.306882000  |
| H | 9.287177000  | -2.254842000 | 6.049042000  |
| H | 9.437516000  | -0.567984000 | 6.933485000  |
| H | 8.974579000  | -5.571576000 | 8.050908000  |
| H | 7.419342000  | -3.885734000 | 9.097178000  |



|   |              |              |             |
|---|--------------|--------------|-------------|
| H | 7.954679000  | -1.643818000 | 8.760348000 |
| H | 10.551134000 | -1.965697000 | 8.774685000 |
| O | 0.588863000  | -1.467148000 | 6.627932000 |
| O | -0.028092000 | -2.180454000 | 4.592717000 |
| C | 0.778327000  | -2.097373000 | 5.557395000 |
| C | 2.108474000  | -2.864514000 | 5.385267000 |
| C | 3.171473000  | -2.622586000 | 6.449825000 |
| C | 4.451091000  | -3.425047000 | 6.217495000 |
| C | 5.520087000  | -3.172835000 | 7.279161000 |
| C | 6.796045000  | -3.982466000 | 7.049492000 |
| C | 8.692759000  | -1.675382000 | 6.751841000 |
| O | 11.250369000 | -4.465584000 | 8.675795000 |
| C | 10.155206000 | -3.952332000 | 8.472505000 |
| N | 9.045455000  | -4.571251000 | 7.950667000 |
| C | 7.859760000  | -3.725587000 | 8.104329000 |
| C | 8.519976000  | -2.310188000 | 8.109019000 |
| N | 9.809852000  | -2.646378000 | 8.725929000 |

#### **2A-TS- Ado**

|   |              |              |              |
|---|--------------|--------------|--------------|
| O | 2.300260000  | -1.960844000 | 2.811326000  |
| P | 1.451326000  | -1.322621000 | 1.644022000  |
| O | 2.292644000  | -0.020348000 | 1.247498000  |
| O | 1.720328000  | -2.378833000 | 0.502456000  |
| O | 0.038978000  | -1.022479000 | 1.941275000  |
| C | 1.747289000  | 0.987106000  | 0.414316000  |
| C | 1.933144000  | 0.695762000  | -1.045034000 |
| C | 1.403744000  | 1.797559000  | -1.961012000 |
| O | 1.185639000  | -0.517335000 | -1.399244000 |
| C | 0.295461000  | -0.250197000 | -2.482435000 |
| C | 0.034030000  | 1.256010000  | -2.405201000 |
| N | -0.861621000 | -1.093283000 | -2.399749000 |
| O | 2.282408000  | 1.921459000  | -3.069037000 |
| O | -0.368220000 | 1.729995000  | -3.675706000 |
| C | -1.857887000 | -1.123109000 | -1.430912000 |
| C | -2.768005000 | -2.043116000 | -1.880887000 |
| N | -2.362679000 | -2.577200000 | -3.090024000 |
| C | -1.222521000 | -2.003476000 | -3.363710000 |
| N | -1.843162000 | -0.277050000 | -0.322507000 |
| H | 2.015573000  | -1.681317000 | 3.692161000  |
| H | 1.524160000  | -1.978974000 | -0.374412000 |
| H | 0.740790000  | 1.271308000  | 0.717532000  |
| H | 2.522909000  | 2.053586000  | 0.665215000  |
| H | 2.986105000  | 0.507025000  | -1.247568000 |
| H | 1.308490000  | 2.751978000  | -1.436396000 |
| H | 0.783869000  | -0.477120000 | -3.433454000 |
| H | -0.715240000 | 1.454809000  | -1.639592000 |

|   |              |              |              |
|---|--------------|--------------|--------------|
| H | 1.767924000  | 2.293497000  | -3.800488000 |
| H | -0.948678000 | 2.491070000  | -3.561696000 |
| H | -3.684010000 | -2.341857000 | -1.397353000 |
| H | -0.599036000 | -2.187480000 | -4.224247000 |
| H | -1.121715000 | -0.505138000 | 0.360194000  |
| H | -2.739550000 | -0.286483000 | 0.145781000  |
| N | 6.484889000  | 2.170618000  | -1.845771000 |
| N | 5.947019000  | 3.156659000  | -3.788230000 |
| N | 9.563167000  | 2.616678000  | -4.388047000 |
| N | 8.866277000  | 1.800332000  | -2.237364000 |
| N | 8.132731000  | 3.649141000  | -5.894902000 |
| C | 6.349537000  | 1.556082000  | -0.521006000 |
| C | 7.090540000  | 2.344967000  | 0.563698000  |
| C | 5.973795000  | 3.247318000  | 1.115979000  |
| C | 4.747151000  | 2.330141000  | 1.023161000  |
| C | 3.431422000  | 3.024676000  | 0.910896000  |
| C | 5.502362000  | 2.730983000  | -2.630577000 |
| C | 7.294619000  | 2.856631000  | -3.773258000 |
| C | 7.646973000  | 2.235364000  | -2.577156000 |
| C | 8.329669000  | 3.046855000  | -4.708210000 |
| C | 9.755927000  | 2.031071000  | -3.200325000 |
| O | 7.524924000  | 1.426066000  | 1.550579000  |
| O | 6.185032000  | 3.630023000  | 2.462879000  |
| O | 4.985320000  | 1.540640000  | -0.166668000 |
| H | 6.736966000  | 0.537945000  | -0.583739000 |
| H | 7.493995000  | 1.890646000  | 2.400224000  |
| H | 7.930533000  | 2.908911000  | 0.153294000  |
| H | 6.708453000  | 4.439919000  | 2.484948000  |
| H | 5.844353000  | 4.118102000  | 0.468631000  |
| H | 4.754600000  | 1.663549000  | 1.891254000  |
| H | 3.337540000  | 3.685655000  | 0.051899000  |
| H | 3.085400000  | 3.471216000  | 1.838833000  |
| H | 7.206039000  | 3.907153000  | -6.185546000 |
| H | 8.883895000  | 3.694224000  | -6.561977000 |
| H | 4.476538000  | 2.766621000  | -2.306582000 |
| H | 10.770873000 | 1.703399000  | -3.001166000 |

## 2B-TS- Ado

|   |              |              |              |
|---|--------------|--------------|--------------|
| O | 4.199299000  | -0.627278000 | 0.446042000  |
| P | 3.024833000  | -1.139426000 | -0.565330000 |
| O | 2.226187000  | 0.256582000  | -0.902646000 |
| O | 3.670184000  | -1.547008000 | -1.838462000 |
| O | 2.100580000  | -2.038768000 | 0.195185000  |
| C | 1.506104000  | 0.909804000  | 0.094285000  |
| C | 0.229276000  | 1.489342000  | -0.440790000 |
| C | -0.563082000 | 2.259864000  | 0.613883000  |

|   |              |              |              |
|---|--------------|--------------|--------------|
| O | -0.642798000 | 0.414423000  | -0.904088000 |
| C | -1.879312000 | 0.464142000  | -0.217175000 |
| C | -1.596340000 | 1.224345000  | 1.081234000  |
| N | -2.410700000 | -0.864002000 | -0.048652000 |
| O | -1.204740000 | 3.366265000  | -0.008896000 |
| O | -2.795310000 | 1.801122000  | 1.569344000  |
| C | -1.860575000 | -1.938123000 | 0.634760000  |
| C | -2.802150000 | -2.933732000 | 0.556980000  |
| N | -3.907791000 | -2.501547000 | -0.151966000 |
| C | -3.637741000 | -1.273504000 | -0.507883000 |
| N | -0.639603000 | -1.856143000 | 1.297470000  |
| H | 3.918710000  | -0.696011000 | 1.366545000  |
| H | 1.371892000  | 0.310078000  | 0.996005000  |
| H | 2.226699000  | 1.941551000  | 0.481727000  |
| H | 0.451871000  | 2.133709000  | -1.291167000 |
| H | 0.071936000  | 2.600422000  | 1.435977000  |
| H | -2.625035000 | 1.021759000  | -0.793458000 |
| H | -1.147375000 | 0.547622000  | 1.808240000  |
| H | -1.989126000 | 3.572555000  | 0.520282000  |
| H | -2.733420000 | 1.896378000  | 2.526513000  |
| H | -2.735790000 | -3.926339000 | 0.972642000  |
| H | -4.264502000 | -0.621486000 | -1.095340000 |
| H | 0.176936000  | -1.723846000 | 0.697948000  |
| H | -0.483033000 | -2.682024000 | 1.859572000  |
| N | 1.806784000  | 5.796122000  | -2.133669000 |
| N | 0.040714000  | 6.887646000  | -1.281751000 |
| N | 1.009452000  | 9.309264000  | -3.912823000 |
| N | 2.443709000  | 7.380680000  | -3.879789000 |
| N | -0.754827000 | 9.623074000  | -2.438866000 |
| C | 2.798009000  | 4.737966000  | -2.369670000 |
| C | 4.223520000  | 5.206433000  | -2.061631000 |
| C | 4.387164000  | 4.761266000  | -0.599532000 |
| C | 3.603209000  | 3.442178000  | -0.569923000 |
| C | 3.048172000  | 3.041230000  | 0.753763000  |
| C | 0.784813000  | 5.810036000  | -1.212011000 |
| C | 0.594206000  | 7.623898000  | -2.310108000 |
| C | 1.688020000  | 6.957607000  | -2.859046000 |
| C | 0.263607000  | 8.865065000  | -2.885696000 |
| C | 2.031296000  | 8.558890000  | -4.341679000 |
| O | 5.110083000  | 4.492286000  | -2.905836000 |
| O | 5.737338000  | 4.524229000  | -0.239818000 |
| O | 2.519553000  | 3.657504000  | -1.512452000 |
| H | 2.712992000  | 4.427439000  | -3.412382000 |
| H | 5.925509000  | 4.352885000  | -2.401518000 |
| H | 4.335621000  | 6.284046000  | -2.196347000 |
| H | 6.136079000  | 5.350464000  | 0.058257000  |

|   |              |              |              |
|---|--------------|--------------|--------------|
| H | 3.920070000  | 5.491820000  | 0.065629000  |
| H | 4.251229000  | 2.653526000  | -0.965275000 |
| H | 2.382733000  | 3.770666000  | 1.210522000  |
| H | 3.786210000  | 2.637370000  | 1.440686000  |
| H | -1.378750000 | 9.268387000  | -1.735396000 |
| H | -1.009279000 | 10.457857000 | -2.938658000 |
| H | 0.623409000  | 4.984430000  | -0.540588000 |
| H | 2.593290000  | 8.968543000  | -5.174463000 |

## 2C-TS- Ado

|   |              |              |              |
|---|--------------|--------------|--------------|
| O | 3.914754000  | -0.837083000 | 0.770826000  |
| P | 3.010028000  | -1.221147000 | -0.387746000 |
| O | 2.252240000  | 0.241703000  | -0.858135000 |
| O | 3.711031000  | -1.620595000 | -1.669644000 |
| O | 1.839820000  | -2.119922000 | 0.013199000  |
| C | 1.506079000  | 0.919397000  | 0.072666000  |
| C | 0.273144000  | 1.544563000  | -0.524973000 |
| C | -0.551838000 | 2.328486000  | 0.490949000  |
| O | -0.617180000 | 0.509720000  | -1.049551000 |
| C | -1.857000000 | 0.541364000  | -0.373530000 |
| C | -1.603375000 | 1.301700000  | 0.930886000  |
| N | -2.385244000 | -0.791717000 | -0.212700000 |
| O | -1.171259000 | 3.433658000  | -0.160845000 |
| O | -2.814296000 | 1.886182000  | 1.385534000  |
| C | -1.870937000 | -1.855040000 | 0.517604000  |
| C | -2.809427000 | -2.851872000 | 0.402429000  |
| N | -3.874764000 | -2.433233000 | -0.372873000 |
| C | -3.584820000 | -1.209988000 | -0.731389000 |
| N | -0.687102000 | -1.766129000 | 1.241619000  |
| H | 1.298297000  | 0.342361000  | 0.977376000  |
| H | 2.193981000  | 1.930877000  | 0.505772000  |
| H | 0.559648000  | 2.186521000  | -1.358033000 |
| H | 0.055468000  | 2.674629000  | 1.331061000  |
| H | -2.603373000 | 1.091765000  | -0.956504000 |
| H | -1.179392000 | 0.623873000  | 1.671201000  |
| H | -1.973400000 | 3.641860000  | 0.340024000  |
| H | -2.772616000 | 1.991071000  | 2.342692000  |
| H | -2.766340000 | -3.837479000 | 0.837938000  |
| H | -4.178844000 | -0.567881000 | -1.362467000 |
| H | 0.179034000  | -1.724929000 | 0.676643000  |
| H | -0.603424000 | -2.559119000 | 1.864463000  |
| N | 1.966153000  | 5.884323000  | -2.024831000 |
| N | 0.152668000  | 6.955543000  | -1.250066000 |
| N | 1.263412000  | 9.435343000  | -3.768562000 |
| N | 2.696017000  | 7.506437000  | -3.698826000 |
| N | -0.604204000 | 9.697438000  | -2.417057000 |

|   |              |              |              |
|---|--------------|--------------|--------------|
| C | 2.971934000  | 4.830947000  | -2.225009000 |
| C | 4.373947000  | 5.291854000  | -1.813739000 |
| C | 4.439826000  | 4.812485000  | -0.355454000 |
| C | 3.654239000  | 3.494210000  | -0.401565000 |
| C | 3.009330000  | 3.066694000  | 0.870301000  |
| C | 0.895289000  | 5.878036000  | -1.160867000 |
| C | 0.759929000  | 7.713131000  | -2.231513000 |
| C | 1.884753000  | 7.060007000  | -2.731843000 |
| C | 0.459387000  | 8.965975000  | -2.798021000 |
| C | 2.308897000  | 8.694937000  | -4.156002000 |
| O | 5.315984000  | 4.597748000  | -2.614019000 |
| O | 5.764035000  | 4.562724000  | 0.086595000  |
| O | 2.640014000  | 3.728793000  | -1.418772000 |
| H | 2.953802000  | 4.550992000  | -3.279765000 |
| H | 6.090459000  | 4.435102000  | -2.054973000 |
| H | 4.493249000  | 6.372331000  | -1.916886000 |
| H | 6.144056000  | 5.380613000  | 0.428431000  |
| H | 3.932751000  | 5.529773000  | 0.294597000  |
| H | 4.328595000  | 2.712604000  | -0.766343000 |
| H | 2.316545000  | 3.788870000  | 1.297160000  |
| H | 3.698100000  | 2.644564000  | 1.596280000  |
| H | -1.166932000 | 9.405555000  | -1.637356000 |
| H | -0.733153000 | 10.621256000 | -2.792773000 |
| H | 0.699542000  | 5.038182000  | -0.516882000 |
| H | 2.917630000  | 9.124611000  | -4.944709000 |

### 3-TS- Ado

|   |              |              |              |
|---|--------------|--------------|--------------|
| N | 0.903041000  | -1.071330000 | 0.413652000  |
| N | 2.201064000  | -0.745929000 | 2.216537000  |
| N | 4.758593000  | -0.302367000 | -0.426525000 |
| N | 2.583894000  | -0.773400000 | -1.334691000 |
| N | 5.202457000  | -0.190431000 | 1.845921000  |
| C | -0.279627000 | -1.332025000 | -0.390009000 |
| C | -0.865297000 | -2.747980000 | -0.231308000 |
| C | -2.105521000 | -2.503673000 | 0.650800000  |
| C | -2.539197000 | -1.092406000 | 0.228343000  |
| C | -3.338559000 | -0.327382000 | 1.230866000  |
| C | 0.992236000  | -1.004538000 | 1.786115000  |
| C | 2.960128000  | -0.633436000 | 1.066631000  |
| C | 2.170748000  | -0.826928000 | -0.065029000 |
| C | 4.324090000  | -0.367249000 | 0.843617000  |
| C | 3.883728000  | -0.500102000 | -1.419086000 |
| O | -1.252325000 | -3.209805000 | -1.514602000 |
| O | -3.149557000 | -3.429445000 | 0.401913000  |
| O | -1.289746000 | -0.416481000 | -0.008318000 |
| H | 0.021518000  | -1.177673000 | -1.426810000 |

|   |              |              |              |
|---|--------------|--------------|--------------|
| H | -2.055543000 | -3.737902000 | -1.388392000 |
| H | -0.145317000 | -3.430980000 | 0.226968000  |
| H | -3.040682000 | -4.195388000 | 0.977796000  |
| H | -1.823481000 | -2.503706000 | 1.706266000  |
| H | -3.091570000 | -1.180929000 | -0.715406000 |
| H | -2.826277000 | -0.164893000 | 2.177137000  |
| H | -4.348877000 | -0.706872000 | 1.356143000  |
| H | 4.888445000  | -0.165094000 | 2.799895000  |
| H | 6.148741000  | 0.078257000  | 1.637230000  |
| H | 0.125342000  | -1.137833000 | 2.412049000  |
| H | 4.292287000  | -0.429840000 | -2.421565000 |
| H | -4.945204000 | 2.980933000  | -1.325617000 |
| H | 4.602536000  | 2.872874000  | 0.941702000  |
| H | 1.125120000  | 3.627205000  | 1.746600000  |
| H | 1.210177000  | 1.889254000  | 1.681949000  |
| H | 0.305172000  | 1.917130000  | -0.653390000 |
| H | 0.207487000  | 3.663269000  | -0.600932000 |
| H | -1.416521000 | 3.511574000  | 1.306719000  |
| H | -1.253505000 | 1.762969000  | 1.291623000  |
| H | -2.076608000 | 1.791848000  | -1.126533000 |
| H | -2.443234000 | 3.494673000  | -0.921282000 |
| H | -3.958998000 | 2.768097000  | 1.086149000  |
| H | -3.530935000 | 0.962264000  | 0.734229000  |
| O | 2.863269000  | 2.982065000  | -0.742140000 |
| C | -6.172191000 | 1.680403000  | -0.120604000 |
| C | -4.837541000 | 2.037069000  | -0.773346000 |
| C | 2.657782000  | 2.879175000  | 0.468184000  |
| C | 1.262245000  | 2.786713000  | 1.057726000  |
| C | 0.149814000  | 2.764551000  | 0.018718000  |
| C | -1.233126000 | 2.649784000  | 0.654985000  |
| C | -2.353420000 | 2.541903000  | -0.379460000 |
| C | -3.695421000 | 2.172250000  | 0.207695000  |
| H | -4.578010000 | 1.282923000  | -1.524970000 |
| H | -6.970545000 | 1.610650000  | -0.862024000 |
| H | -6.113244000 | 0.721611000  | 0.398224000  |
| H | -6.461112000 | 2.437240000  | 0.613019000  |
| N | 3.681602000  | 2.847728000  | 1.351216000  |
| C | 3.576493000  | 2.697068000  | 2.793528000  |
| H | 3.014810000  | 3.518050000  | 3.242735000  |
| H | 3.096128000  | 1.755322000  | 3.066235000  |
| H | 4.580209000  | 2.703056000  | 3.211036000  |

**4-TS- Ado**

|   |             |              |              |
|---|-------------|--------------|--------------|
| C | 2.347869000 | -0.084665000 | -1.449989000 |
| C | 0.924134000 | 0.121168000  | -0.999008000 |
| O | 0.003747000 | 0.304076000  | -1.791009000 |

|   |              |              |              |
|---|--------------|--------------|--------------|
| N | 0.713466000  | 0.104614000  | 0.343883000  |
| C | -0.527739000 | 0.479392000  | 0.921953000  |
| C | -1.791679000 | -0.273994000 | 0.572346000  |
| O | -2.867830000 | 0.326704000  | 0.622504000  |
| H | 2.967330000  | -0.574433000 | -0.699726000 |
| H | -0.798292000 | 1.686761000  | 0.523398000  |
| H | -0.435543000 | 0.595181000  | 1.998746000  |
| N | -1.740777000 | -1.582720000 | 0.244713000  |
| H | -2.642364000 | -1.966857000 | 0.003212000  |
| H | 1.518276000  | 0.056241000  | 0.947470000  |
| H | 2.779383000  | 0.893764000  | -1.670733000 |
| H | 2.350361000  | -0.669862000 | -2.367439000 |
| C | -0.625222000 | -2.516556000 | 0.306739000  |
| H | -0.005560000 | -2.476917000 | -0.590798000 |
| H | 0.001384000  | -2.323013000 | 1.174392000  |
| H | -1.034122000 | -3.520808000 | 0.399909000  |
| N | 2.232105000  | 3.846887000  | -2.392720000 |
| N | 1.655960000  | 3.093067000  | -4.425861000 |
| N | 4.538182000  | 5.216581000  | -5.381733000 |
| N | 4.135110000  | 5.243634000  | -3.012100000 |
| N | 3.249677000  | 4.014313000  | -6.890385000 |
| C | 2.236567000  | 4.042505000  | -0.938496000 |
| C | 1.745340000  | 5.437046000  | -0.541951000 |
| C | 0.243327000  | 5.187765000  | -0.323790000 |
| C | 0.231682000  | 3.770349000  | 0.272521000  |
| C | -1.017631000 | 2.993122000  | 0.037890000  |
| C | 1.383583000  | 3.064538000  | -3.143635000 |
| C | 2.743496000  | 3.937614000  | -4.530382000 |
| C | 3.119815000  | 4.412547000  | -3.275782000 |
| C | 3.511206000  | 4.382150000  | -5.623524000 |
| C | 4.785942000  | 5.589675000  | -4.120713000 |
| O | 2.375754000  | 5.793305000  | 0.675326000  |
| O | -0.342118000 | 6.095812000  | 0.592046000  |
| O | 1.360335000  | 3.110013000  | -0.353262000 |
| H | 3.256289000  | 3.879543000  | -0.586874000 |
| H | 1.740595000  | 6.328560000  | 1.174224000  |
| H | 1.946963000  | 6.175033000  | -1.321925000 |
| H | -0.646953000 | 6.876185000  | 0.114148000  |
| H | -0.279055000 | 5.199291000  | -1.283377000 |
| H | 0.434519000  | 3.857819000  | 1.345096000  |
| H | -1.258886000 | 2.800365000  | -1.003230000 |
| H | -1.864360000 | 3.320107000  | 0.633061000  |
| H | 2.529345000  | 3.341876000  | -7.086831000 |
| H | 3.862517000  | 4.306053000  | -7.632289000 |
| H | 0.611394000  | 2.474820000  | -2.678721000 |
| H | 5.627551000  | 6.261846000  | -3.990231000 |

**5-TS- Ado**

|   |              |              |              |
|---|--------------|--------------|--------------|
| N | -2.481089000 | -0.094213000 | -0.106614000 |
| N | -3.176760000 | -2.227964000 | -0.074355000 |
| N | -6.401097000 | -0.569609000 | -0.837099000 |
| N | -4.600043000 | 1.006181000  | -0.608800000 |
| N | -6.142461000 | -2.861269000 | -0.587789000 |
| C | -1.598596000 | 1.075242000  | -0.016815000 |
| C | -1.763620000 | 1.818807000  | 1.312659000  |
| C | -0.665290000 | 1.167534000  | 2.170302000  |
| C | 0.450170000  | 0.927793000  | 1.145826000  |
| C | 1.396411000  | -0.184401000 | 1.442460000  |
| C | -2.154274000 | -1.419032000 | 0.061506000  |
| C | -4.241407000 | -1.391823000 | -0.346630000 |
| C | -3.828013000 | -0.061235000 | -0.372738000 |
| C | -5.607080000 | -1.627876000 | -0.594734000 |
| C | -5.865045000 | 0.656672000  | -0.831211000 |
| O | -1.479329000 | 3.188968000  | 1.090529000  |
| O | -0.191091000 | 2.019625000  | 3.200398000  |
| O | -0.263098000 | 0.643741000  | -0.091167000 |
| H | -1.842041000 | 1.729724000  | -0.855009000 |
| H | -1.039778000 | 3.515964000  | 1.889907000  |
| H | -2.766460000 | 1.688182000  | 1.727096000  |
| H | -0.750863000 | 1.916249000  | 3.979080000  |
| H | -1.023896000 | 0.218772000  | 2.577220000  |
| H | 1.016460000  | 1.853331000  | 1.017058000  |
| H | 0.938856000  | -1.167881000 | 1.534133000  |
| H | 2.096576000  | 0.042679000  | 2.240498000  |
| H | -5.559108000 | -3.669732000 | -0.462877000 |
| H | -7.112089000 | -2.987492000 | -0.822128000 |
| H | -1.140484000 | -1.717102000 | 0.266346000  |
| H | -6.556015000 | 1.468175000  | -1.034177000 |
| C | 2.726011000  | 1.395457000  | -3.643220000 |
| N | 3.474338000  | 0.951651000  | -2.727948000 |
| C | 3.003496000  | 1.060723000  | -1.348961000 |
| C | 3.891738000  | 2.017401000  | -0.488437000 |
| O | 4.956684000  | 2.451900000  | -0.979857000 |
| C | 2.953781000  | -0.338962000 | -0.754064000 |
| C | 4.263721000  | -0.955859000 | -0.326836000 |
| C | 4.094277000  | -2.383807000 | 0.194217000  |
| C | 5.423280000  | -2.963811000 | 0.640697000  |
| N | 5.259048000  | -4.384793000 | 1.121366000  |
| O | 3.428577000  | 2.260670000  | 0.652597000  |
| H | 1.754114000  | 1.868145000  | -3.452027000 |
| H | 1.987123000  | 1.476836000  | -1.321931000 |
| H | 2.350546000  | -1.008439000 | -1.370726000 |



|   |             |              |              |
|---|-------------|--------------|--------------|
| H | 4.959929000 | -0.956030000 | -1.174194000 |
| H | 4.722197000 | -0.334488000 | 0.448434000  |
| H | 3.663677000 | -3.012504000 | -0.590745000 |
| H | 3.392752000 | -2.388848000 | 1.033132000  |
| H | 6.146652000 | -2.996726000 | -0.171674000 |
| H | 5.851689000 | -2.405445000 | 1.470638000  |
| H | 6.146268000 | -4.779745000 | 1.436999000  |
| H | 4.602241000 | -4.440074000 | 1.901848000  |
| H | 4.901155000 | -4.987914000 | 0.378434000  |
| H | 2.205093000 | -0.260326000 | 0.342137000  |
| H | 3.040553000 | 1.318646000  | -4.682926000 |

### 6A-TS- Ado

|   |              |              |              |
|---|--------------|--------------|--------------|
| C | 2.638874000  | -1.268825000 | 0.742144000  |
| N | 1.376535000  | -1.308515000 | 0.778322000  |
| C | 0.663201000  | -0.066802000 | 0.495179000  |
| C | -0.352006000 | 0.275760000  | 1.575817000  |
| O | -0.828672000 | -0.782026000 | 2.247165000  |
| C | -0.028893000 | -0.165229000 | -0.862281000 |
| C | -1.150998000 | -1.148401000 | -1.044033000 |
| O | -0.721465000 | 1.407627000  | 1.785232000  |
| H | 3.210852000  | -0.355543000 | 0.542132000  |
| H | 1.344211000  | 0.792581000  | 0.456722000  |
| H | 0.711955000  | -0.208305000 | -1.655382000 |
| H | -0.794300000 | -2.169628000 | -0.862523000 |
| H | -1.946978000 | -0.982488000 | -0.313980000 |
| H | -0.560514000 | 1.028136000  | -1.075095000 |
| H | 3.205359000  | -2.181547000 | 0.913427000  |
| C | -1.791751000 | -1.141577000 | -2.455005000 |
| O | -1.185687000 | -0.537651000 | -3.376425000 |
| O | -2.874204000 | -1.769297000 | -2.559710000 |
| N | 2.059162000  | 2.297065000  | -3.916892000 |
| N | 1.998763000  | 0.449916000  | -5.188043000 |
| N | 5.198848000  | 1.875243000  | -6.393337000 |
| N | 4.171252000  | 3.244379000  | -4.705780000 |
| N | 4.263020000  | -0.093396000 | -7.191319000 |
| C | 1.661358000  | 3.293770000  | -2.940894000 |
| C | 0.457613000  | 4.157180000  | -3.374192000 |
| C | -0.150670000 | 4.523930000  | -2.019326000 |
| C | 0.029013000  | 3.218567000  | -1.231140000 |
| C | -1.094110000 | 2.239344000  | -1.398287000 |
| C | 1.382042000  | 1.145680000  | -4.263374000 |
| C | 3.139105000  | 1.176117000  | -5.471714000 |
| C | 3.197515000  | 2.327107000  | -4.688441000 |
| C | 4.207588000  | 0.966929000  | -6.362302000 |
| C | 5.125422000  | 2.936221000  | -5.580676000 |

|   |              |              |              |
|---|--------------|--------------|--------------|
| O | 0.801737000  | 5.248891000  | -4.190619000 |
| O | 0.653372000  | 5.586160000  | -1.505974000 |
| O | 1.277501000  | 2.655088000  | -1.743457000 |
| H | 2.534076000  | 3.933429000  | -2.788813000 |
| H | 1.141940000  | 5.943421000  | -3.607708000 |
| H | -0.242760000 | 3.540018000  | -3.937206000 |
| H | 0.192260000  | 6.010885000  | -0.774657000 |
| H | -1.197025000 | 4.823040000  | -2.093268000 |
| H | 0.193018000  | 3.433934000  | -0.175041000 |
| H | -1.415101000 | 2.052059000  | -2.419316000 |
| H | -1.918381000 | 2.375551000  | -0.704475000 |
| H | 3.590671000  | -0.835425000 | -7.104096000 |
| H | 5.096068000  | -0.256169000 | -7.730837000 |
| H | 0.458048000  | 0.846462000  | -3.784851000 |
| H | 5.954365000  | 3.633127000  | -5.647952000 |
| H | -1.489778000 | -0.460154000 | 2.882936000  |

#### **6B-TS- Ado**

|   |              |              |              |
|---|--------------|--------------|--------------|
| C | 2.460933000  | -2.227979000 | -0.885217000 |
| N | 1.692597000  | -1.588956000 | -0.111683000 |
| C | 1.380668000  | -0.202406000 | -0.455249000 |
| C | 1.910853000  | 0.755693000  | 0.669051000  |
| O | 1.483596000  | 0.575222000  | 1.832241000  |
| C | -0.113785000 | -0.052954000 | -0.685440000 |
| C | -1.042889000 | -0.437426000 | 0.435156000  |
| O | 2.717104000  | 1.636305000  | 0.284381000  |
| H | 2.897543000  | -1.796816000 | -1.794379000 |
| H | 1.888579000  | 0.087663000  | -1.382237000 |
| H | -0.418893000 | -0.464514000 | -1.646673000 |
| H | -0.916458000 | -1.492448000 | 0.705201000  |
| H | -0.805722000 | 0.116330000  | 1.344826000  |
| H | -0.299937000 | 1.246843000  | -0.878703000 |
| H | 2.715218000  | -3.261422000 | -0.655901000 |
| C | -2.495898000 | -0.238261000 | 0.104622000  |
| O | -2.951546000 | 0.089588000  | -0.966648000 |
| O | -3.283348000 | -0.484235000 | 1.174526000  |
| H | -4.208076000 | -0.357578000 | 0.906486000  |
| N | -0.467792000 | 2.854454000  | -5.190985000 |
| N | -2.627306000 | 2.613797000  | -5.754289000 |
| N | -1.311129000 | 3.851886000  | -8.988575000 |
| N | 0.407759000  | 3.669149000  | -7.317913000 |
| N | -3.539468000 | 3.334036000  | -8.601680000 |
| C | 0.766362000  | 2.830226000  | -4.393923000 |
| C | 1.213851000  | 4.237225000  | -3.986942000 |
| C | 0.536611000  | 4.392755000  | -2.614654000 |
| C | 0.617726000  | 2.971829000  | -2.041545000 |

|   |              |             |              |
|---|--------------|-------------|--------------|
| C | -0.445744000 | 2.596989000 | -1.065264000 |
| C | -1.735143000 | 2.489549000 | -4.801920000 |
| C | -1.910543000 | 3.085698000 | -6.835940000 |
| C | -0.565151000 | 3.238569000 | -6.505983000 |
| C | -2.273422000 | 3.419054000 | -8.154651000 |
| C | -0.056139000 | 3.949182000 | -8.533713000 |
| O | 2.624175000  | 4.228344000 | -3.851627000 |
| O | 1.224209000  | 5.290533000 | -1.758247000 |
| O | 0.530291000  | 2.109556000 | -3.212077000 |
| H | 1.533710000  | 2.341357000 | -4.996052000 |
| H | 2.837573000  | 4.823015000 | -3.116844000 |
| H | 0.893403000  | 4.989638000 | -4.711686000 |
| H | 0.908213000  | 6.187429000 | -1.919568000 |
| H | -0.505637000 | 4.693603000 | -2.746405000 |
| H | 1.601161000  | 2.831132000 | -1.585545000 |
| H | -1.466980000 | 2.698883000 | -1.424673000 |
| H | -0.295836000 | 3.009495000 | -0.071507000 |
| H | -4.256382000 | 2.934893000 | -8.021489000 |
| H | -3.737246000 | 3.504994000 | -9.572755000 |
| H | -1.925105000 | 2.127015000 | -3.806464000 |
| H | 0.674361000  | 4.302711000 | -9.253817000 |

#### 6C-TS- Ado

|   |              |              |              |
|---|--------------|--------------|--------------|
| C | 2.385199000  | -2.194917000 | -1.092899000 |
| N | 1.581259000  | -1.662186000 | -0.276631000 |
| C | 1.421851000  | -0.212147000 | -0.348701000 |
| C | 1.686368000  | 0.455380000  | 0.996497000  |
| O | 1.290983000  | -0.270028000 | 2.051171000  |
| C | 0.021842000  | 0.130740000  | -0.842744000 |
| C | -1.149634000 | -0.333588000 | -0.019211000 |
| O | 2.168994000  | 1.558029000  | 1.093648000  |
| H | 2.974604000  | -1.627330000 | -1.821382000 |
| H | 2.137392000  | 0.244952000  | -1.041679000 |
| H | -0.077204000 | -0.101672000 | -1.899320000 |
| H | -1.126348000 | -1.419594000 | 0.124746000  |
| H | -1.140685000 | 0.090593000  | 0.987658000  |
| H | -0.039482000 | 1.467001000  | -0.866168000 |
| H | 2.508871000  | -3.275424000 | -1.086856000 |
| C | -2.473820000 | 0.006180000  | -0.654475000 |
| O | -2.630111000 | 0.520542000  | -1.737283000 |
| O | -3.502833000 | -0.344481000 | 0.138535000  |
| H | -4.332052000 | -0.117159000 | -0.313500000 |
| N | -0.347320000 | 2.759686000  | -4.989813000 |
| N | -2.496978000 | 2.222541000  | -5.346145000 |
| N | -1.704839000 | 3.690432000  | -8.654307000 |
| N | 0.186276000  | 3.719046000  | -7.170711000 |

|   |              |             |              |
|---|--------------|-------------|--------------|
| N | -3.789561000 | 2.862535000 | -8.061926000 |
| C | 0.961458000  | 2.868859000 | -4.327017000 |
| C | 1.343588000  | 4.324244000 | -4.054495000 |
| C | 0.729039000  | 4.547104000 | -2.662149000 |
| C | 0.912312000  | 3.179439000 | -1.986437000 |
| C | -0.132663000 | 2.811693000 | -0.982926000 |
| C | -1.504401000 | 2.205817000 | -4.488973000 |
| C | -1.967982000 | 2.811577000 | -6.477075000 |
| C | -0.630034000 | 3.146178000 | -6.277648000 |
| C | -2.507455000 | 3.114648000 | -7.741556000 |
| C | -0.434309000 | 3.951986000 | -8.324944000 |
| O | 2.756985000  | 4.399622000 | -3.998225000 |
| O | 1.404488000  | 5.542175000 | -1.911212000 |
| O | 0.900006000  | 2.222710000 | -3.083401000 |
| H | 1.700713000  | 2.383392000 | -4.965280000 |
| H | 2.975662000  | 5.067085000 | -3.330841000 |
| H | 0.942113000  | 5.001426000 | -4.811406000 |
| H | 1.032587000  | 6.406580000 | -2.123837000 |
| H | -0.333134000 | 4.782265000 | -2.762668000 |
| H | 1.904787000  | 3.148905000 | -1.529757000 |
| H | -1.159421000 | 2.943730000 | -1.314587000 |
| H | 0.051760000  | 3.187991000 | 0.018271000  |
| H | -4.383086000 | 2.362215000 | -7.423803000 |
| H | -4.109451000 | 3.024134000 | -9.001500000 |
| H | -1.546827000 | 1.794118000 | -3.494088000 |
| H | 0.163474000  | 4.413949000 | -9.103687000 |
| H | 1.461555000  | 0.246459000 | 2.856908000  |

#### 6D-TS- Ado

|   |              |              |              |
|---|--------------|--------------|--------------|
| C | 3.038151000  | -1.141115000 | 0.073097000  |
| N | 1.821704000  | -1.116427000 | 0.412922000  |
| C | 1.067227000  | 0.108073000  | 0.154046000  |
| C | 0.496121000  | 0.728586000  | 1.469618000  |
| O | 0.129698000  | -0.038349000 | 2.386332000  |
| C | -0.036120000 | -0.195268000 | -0.854510000 |
| C | -1.166080000 | -1.099931000 | -0.442257000 |
| O | 0.436143000  | 1.986228000  | 1.470010000  |
| H | 3.553176000  | -0.290192000 | -0.391535000 |
| H | 1.723396000  | 0.870366000  | -0.287691000 |
| H | 0.380704000  | -0.469119000 | -1.823644000 |
| H | -0.762565000 | -2.065600000 | -0.111294000 |
| H | -1.689798000 | -0.691522000 | 0.422130000  |
| H | -0.572427000 | 0.981084000  | -1.141752000 |
| H | 3.626951000  | -2.041998000 | 0.239768000  |
| C | -2.215170000 | -1.408962000 | -1.533944000 |
| O | -1.957304000 | -1.089856000 | -2.722682000 |

|   |              |              |              |
|---|--------------|--------------|--------------|
| O | -3.260840000 | -1.985216000 | -1.133161000 |
| N | -3.742454000 | 2.666143000  | 1.775520000  |
| N | -2.693734000 | 2.767345000  | 3.755363000  |
| N | -6.193948000 | 3.011703000  | 4.944145000  |
| N | -6.056766000 | 2.825632000  | 2.551527000  |
| N | -4.335051000 | 3.071503000  | 6.333841000  |
| C | -3.941778000 | 2.611481000  | 0.341366000  |
| C | -3.606417000 | 3.921110000  | -0.396265000 |
| C | -3.329399000 | 3.392988000  | -1.802388000 |
| C | -2.582385000 | 2.079039000  | -1.511115000 |
| C | -1.092505000 | 2.215803000  | -1.460829000 |
| C | -2.542940000 | 2.662590000  | 2.456493000  |
| C | -4.059530000 | 2.849503000  | 3.944541000  |
| C | -4.730581000 | 2.784273000  | 2.724734000  |
| C | -4.858409000 | 2.971991000  | 5.095434000  |
| C | -6.703969000 | 2.936028000  | 3.708748000  |
| O | -4.605401000 | 4.907419000  | -0.308435000 |
| O | -4.612796000 | 3.176345000  | -2.394448000 |
| O | -3.089185000 | 1.636930000  | -0.212678000 |
| H | -4.997205000 | 2.366679000  | 0.189758000  |
| H | -5.294437000 | 4.671815000  | -0.946482000 |
| H | -2.692136000 | 4.340350000  | 0.025688000  |
| H | -4.503479000 | 3.007004000  | -3.336518000 |
| H | -2.734722000 | 4.080999000  | -2.404635000 |
| H | -2.867183000 | 1.320744000  | -2.243104000 |
| H | -0.706002000 | 2.832742000  | -0.655000000 |
| H | -0.643579000 | 2.426506000  | -2.429392000 |
| H | -3.351625000 | 2.918035000  | 6.474764000  |
| H | -4.947294000 | 3.032995000  | 7.130976000  |
| H | -1.591985000 | 2.538742000  | 1.951473000  |
| H | -7.786866000 | 2.969915000  | 3.648707000  |

#### 7A-TS- Ado

|   |              |              |              |
|---|--------------|--------------|--------------|
| C | 0.859288000  | -0.710672000 | -0.835972000 |
| C | 0.369291000  | 0.587044000  | -0.782333000 |
| C | 1.270004000  | 1.671786000  | -0.792266000 |
| N | 0.000577000  | -1.751489000 | -0.742889000 |
| C | -1.438893000 | -1.570319000 | -0.749524000 |
| C | -1.800130000 | -0.226404000 | -0.116106000 |
| N | -1.007511000 | 0.827483000  | -0.648601000 |
| C | -3.271398000 | 0.033732000  | -0.136803000 |
| O | -3.567888000 | 1.345359000  | -0.086998000 |
| O | -4.112918000 | -0.836545000 | -0.112109000 |
| O | 0.977155000  | 2.873624000  | -0.684397000 |
| N | 4.351229000  | -0.246633000 | -1.167349000 |
| H | -1.612741000 | -0.372681000 | 1.093958000  |

|   |              |              |              |
|---|--------------|--------------|--------------|
| H | 3.285482000  | 2.045632000  | -0.953083000 |
| H | 0.383491000  | -2.680576000 | -0.788172000 |
| H | -1.904244000 | -2.371838000 | -0.179522000 |
| H | -1.838044000 | -1.609352000 | -1.768954000 |
| H | -1.222016000 | 1.757589000  | -0.316632000 |
| H | 4.646411000  | -1.186921000 | -0.957873000 |
| H | 5.014326000  | 0.469088000  | -0.917347000 |
| N | 2.182002000  | -1.007886000 | -0.940142000 |
| C | 3.022027000  | -0.005572000 | -0.993165000 |
| N | 2.615636000  | 1.289620000  | -0.925850000 |
| H | -4.532473000 | 1.442228000  | -0.031710000 |
| N | 3.001582000  | 0.148400000  | 2.455256000  |
| N | 3.652981000  | 2.294140000  | 2.391201000  |
| N | 6.906530000  | 0.669536000  | 1.677930000  |
| N | 5.144854000  | -0.931285000 | 2.011348000  |
| N | 6.597622000  | 2.964604000  | 1.813165000  |
| C | 2.133500000  | -1.013886000 | 2.525713000  |
| C | 1.946496000  | -1.622048000 | 3.935510000  |
| C | 0.452942000  | -1.346314000 | 4.229466000  |
| C | -0.155886000 | -1.294141000 | 2.815934000  |
| C | -1.437964000 | -0.568212000 | 2.665941000  |
| C | 2.645686000  | 1.474301000  | 2.559556000  |
| C | 4.736403000  | 1.467483000  | 2.163515000  |
| C | 4.351456000  | 0.128615000  | 2.201755000  |
| C | 6.092701000  | 1.721672000  | 1.882897000  |
| C | 6.399360000  | -0.566514000 | 1.756057000  |
| O | 2.196149000  | -3.014553000 | 3.863429000  |
| O | -0.152019000 | -2.374065000 | 4.994175000  |
| O | 0.861874000  | -0.604151000 | 2.074605000  |
| H | 2.566554000  | -1.771531000 | 1.868084000  |
| H | 1.551758000  | -3.440584000 | 4.449913000  |
| H | 2.609285000  | -1.147398000 | 4.663660000  |
| H | -0.108546000 | -2.145495000 | 5.929864000  |
| H | 0.338308000  | -0.371836000 | 4.707848000  |
| H | -0.248790000 | -2.325015000 | 2.449540000  |
| H | -1.433161000 | 0.477895000  | 2.959077000  |
| H | -2.336502000 | -1.119794000 | 2.916168000  |
| H | 5.999608000  | 3.765268000  | 1.917788000  |
| H | 7.562490000  | 3.100911000  | 1.565102000  |
| H | 1.622479000  | 1.759570000  | 2.734932000  |
| H | 7.105306000  | -1.371903000 | 1.583645000  |

**7B-TS- Ado**

|   |             |              |              |
|---|-------------|--------------|--------------|
| C | 0.905394000 | -0.612502000 | -0.959979000 |
| C | 0.416480000 | 0.681016000  | -0.809410000 |
| C | 1.317127000 | 1.762977000  | -0.763573000 |

|   |              |              |              |
|---|--------------|--------------|--------------|
| N | 0.043796000  | -1.652638000 | -0.995185000 |
| C | -1.396394000 | -1.501523000 | -0.806599000 |
| C | -1.734287000 | -0.176091000 | -0.137554000 |
| N | -0.960533000 | 0.883685000  | -0.676851000 |
| C | -3.230106000 | 0.152870000  | -0.052263000 |
| O | -3.524283000 | 1.370164000  | 0.048871000  |
| O | -4.015657000 | -0.825485000 | -0.027761000 |
| O | 1.031437000  | 2.962840000  | -0.601727000 |
| N | 4.407803000  | -0.133345000 | -1.220516000 |
| H | -1.467525000 | -0.328093000 | 1.070034000  |
| H | 3.335520000  | 2.139561000  | -0.878713000 |
| H | 0.446514000  | -2.573902000 | -0.958734000 |
| H | -1.763209000 | -2.318364000 | -0.187468000 |
| H | -1.913035000 | -1.565328000 | -1.770175000 |
| H | -1.244628000 | 1.804339000  | -0.373624000 |
| H | 4.691390000  | -1.087169000 | -1.060365000 |
| H | 5.059569000  | 0.553357000  | -0.874841000 |
| N | 2.231302000  | -0.904572000 | -1.070703000 |
| C | 3.070607000  | 0.097044000  | -1.050680000 |
| N | 2.664186000  | 1.385907000  | -0.916724000 |
| N | 2.977617000  | -0.070703000 | 2.399935000  |
| N | 3.461039000  | 2.117568000  | 2.278012000  |
| N | 6.827766000  | 0.734188000  | 1.588106000  |
| N | 5.199199000  | -0.990221000 | 1.978436000  |
| N | 6.341477000  | 3.001417000  | 1.672157000  |
| C | 2.197457000  | -1.300129000 | 2.530532000  |
| C | 1.963800000  | -1.729223000 | 3.986425000  |
| C | 0.556523000  | -1.172066000 | 4.263183000  |
| C | -0.138397000 | -1.320848000 | 2.897769000  |
| C | -1.258817000 | -0.388522000 | 2.614484000  |
| C | 2.520698000  | 1.225469000  | 2.464691000  |
| C | 4.605629000  | 1.372120000  | 2.072871000  |
| C | 4.325365000  | 0.008230000  | 2.147554000  |
| C | 5.935748000  | 1.724394000  | 1.775637000  |
| C | 6.419337000  | -0.535516000 | 1.702752000  |
| O | 1.956419000  | -3.146354000 | 4.030833000  |
| O | -0.147306000 | -1.912415000 | 5.246478000  |
| O | 0.934721000  | -1.084128000 | 1.952450000  |
| H | 2.751345000  | -2.072282000 | 1.994959000  |
| H | 1.304170000  | -3.399888000 | 4.701368000  |
| H | 2.725854000  | -1.320543000 | 4.655691000  |
| H | 0.068494000  | -1.566054000 | 6.120454000  |
| H | 0.619538000  | -0.115388000 | 4.534970000  |
| H | -0.469274000 | -2.361011000 | 2.803051000  |
| H | -1.053223000 | 0.665307000  | 2.788416000  |
| H | -2.238232000 | -0.712914000 | 2.948425000  |

|   |             |              |             |
|---|-------------|--------------|-------------|
| H | 5.678236000 | 3.753161000  | 1.741905000 |
| H | 7.285623000 | 3.205258000  | 1.392288000 |
| H | 1.477107000 | 1.440749000  | 2.618853000 |
| H | 7.184984000 | -1.287352000 | 1.544001000 |

### 8A-TS- Ado

|   |              |              |              |
|---|--------------|--------------|--------------|
| N | -1.128758000 | -1.654946000 | 0.102937000  |
| N | -0.955743000 | -2.180728000 | -2.070467000 |
| N | -4.633178000 | -2.437612000 | -1.691391000 |
| N | -3.547593000 | -1.826096000 | 0.364211000  |
| N | -3.496496000 | -2.851226000 | -3.671341000 |
| C | -0.758971000 | -1.191069000 | 1.444369000  |
| C | -0.800951000 | -2.310597000 | 2.487405000  |
| C | 0.651536000  | -2.818462000 | 2.460312000  |
| C | 1.457266000  | -1.534976000 | 2.201765000  |
| C | 2.756231000  | -1.717865000 | 1.486320000  |
| C | -0.306171000 | -1.828058000 | -0.986474000 |
| C | -2.279733000 | -2.234154000 | -1.678949000 |
| C | -2.407036000 | -1.902758000 | -0.331365000 |
| C | -3.474294000 | -2.511371000 | -2.370194000 |
| C | -4.604504000 | -2.107032000 | -0.394912000 |
| O | -1.104570000 | -1.727199000 | 3.742173000  |
| O | 1.057623000  | -3.397424000 | 3.688971000  |
| O | 0.559431000  | -0.714843000 | 1.403126000  |
| H | -1.447927000 | -0.388107000 | 1.711551000  |
| H | -0.616139000 | -2.231033000 | 4.410414000  |
| H | -1.528115000 | -3.083161000 | 2.225078000  |
| H | 0.819213000  | -4.332043000 | 3.693467000  |
| H | 0.783200000  | -3.518009000 | 1.631324000  |
| H | 1.611186000  | -1.029847000 | 3.159603000  |
| H | 2.725209000  | -2.384956000 | 0.628373000  |
| H | 3.612569000  | -1.887064000 | 2.131083000  |
| H | -2.651478000 | -2.832258000 | -4.214899000 |
| H | -4.377936000 | -2.958322000 | -4.143524000 |
| H | 0.751530000  | -1.634961000 | -0.919450000 |
| H | -5.570818000 | -2.061322000 | 0.096142000  |
| O | 3.565826000  | 0.820397000  | -3.145120000 |
| O | 5.452979000  | 0.264448000  | 0.760974000  |
| C | 2.487847000  | 1.645986000  | 0.615375000  |
| C | 2.324665000  | 2.878922000  | -0.310557000 |
| C | 1.064021000  | 3.634134000  | 0.039978000  |
| C | -2.646864000 | 2.919375000  | 0.151334000  |
| C | -1.633109000 | 1.316828000  | -1.336156000 |
| O | 1.110302000  | 4.726134000  | 0.580473000  |
| H | 5.395318000  | -1.659318000 | -0.197552000 |
| O | -3.655881000 | 4.485945000  | 1.610717000  |



|   |              |              |              |
|---|--------------|--------------|--------------|
| O | 4.957480000  | -1.716965000 | -1.059861000 |
| H | 3.068437000  | -0.513003000 | 0.808691000  |
| C | -0.259221000 | 2.982520000  | -0.242735000 |
| O | -4.981233000 | 2.946051000  | 0.661655000  |
| C | -1.400688000 | 3.498566000  | 0.372484000  |
| C | -2.760408000 | 1.825447000  | -0.712456000 |
| H | 3.147476000  | -1.167918000 | -2.728138000 |
| H | 4.902425000  | 1.613141000  | -0.719883000 |
| H | 5.645033000  | -0.129530000 | -2.211133000 |
| H | 6.329062000  | 0.655741000  | 0.661193000  |
| H | 2.727928000  | 0.898258000  | -3.617838000 |
| C | -3.878410000 | 3.425148000  | 0.811834000  |
| C | -0.385435000 | 1.878460000  | -1.091366000 |
| H | 3.041938000  | 1.924492000  | 1.513476000  |
| H | 3.165693000  | 3.562612000  | -0.213193000 |
| H | 1.512033000  | 1.294068000  | 0.943054000  |
| H | 2.279342000  | 2.546040000  | -1.348849000 |
| H | -1.300164000 | 4.348319000  | 1.031056000  |
| H | -3.731909000 | 1.381330000  | -0.879193000 |
| H | -1.719320000 | 0.471749000  | -2.004503000 |
| H | 0.485251000  | 1.439855000  | -1.556767000 |
| O | 2.534078000  | 0.040082000  | -1.203600000 |
| C | 4.665347000  | 0.602322000  | -0.373343000 |
| C | 4.823611000  | -0.391028000 | -1.540327000 |
| C | 3.477342000  | -0.249721000 | -2.239834000 |
| C | 3.189402000  | 0.483497000  | -0.036610000 |
| H | -4.503755000 | 4.751795000  | 2.001307000  |

### 8B-TS- Ado

66

symmetry c1

|   |              |              |              |
|---|--------------|--------------|--------------|
| N | -1.127947000 | -1.654669000 | 0.079466000  |
| N | -0.939916000 | -2.164085000 | -2.096685000 |
| N | -4.608859000 | -2.524636000 | -1.720820000 |
| N | -3.541714000 | -1.891633000 | 0.337880000  |
| N | -3.459751000 | -2.901495000 | -3.701416000 |
| C | -0.772312000 | -1.176379000 | 1.420071000  |
| C | -0.824029000 | -2.286816000 | 2.472191000  |
| C | 0.628257000  | -2.795804000 | 2.461195000  |
| C | 1.437020000  | -1.514914000 | 2.199232000  |
| C | 2.741251000  | -1.703642000 | 1.494787000  |
| C | -0.300830000 | -1.799135000 | -1.010428000 |
| C | -2.262244000 | -2.254389000 | -1.706403000 |
| C | -2.398973000 | -1.932983000 | -0.357184000 |
| C | -3.448005000 | -2.562656000 | -2.398929000 |
| C | -4.589990000 | -2.198759000 | -0.422828000 |

|   |              |              |              |
|---|--------------|--------------|--------------|
| O | -1.137478000 | -1.692741000 | 3.719686000  |
| O | 1.023761000  | -3.365710000 | 3.697794000  |
| O | 0.545960000  | -0.699613000 | 1.388816000  |
| H | -1.463771000 | -0.370518000 | 1.671769000  |
| H | -0.654812000 | -2.191369000 | 4.395923000  |
| H | -1.549624000 | -3.060995000 | 2.210676000  |
| H | 0.783464000  | -4.299789000 | 3.707639000  |
| H | 0.766193000  | -3.502056000 | 1.638924000  |
| H | 1.584507000  | -1.003401000 | 3.154785000  |
| H | 2.714561000  | -2.373779000 | 0.639041000  |
| H | 3.591724000  | -1.873432000 | 2.147210000  |
| H | -2.617967000 | -2.838893000 | -4.246914000 |
| H | -4.338883000 | -3.014705000 | -4.176660000 |
| H | 0.751683000  | -1.580118000 | -0.940917000 |
| H | -5.557408000 | -2.182446000 | 0.067964000  |
| O | 3.586988000  | 0.788821000  | -3.150416000 |
| O | 5.448431000  | 0.275346000  | 0.774694000  |
| C | 2.481680000  | 1.654907000  | 0.590117000  |
| C | 2.320809000  | 2.873074000  | -0.353261000 |
| C | 1.076894000  | 3.658676000  | 0.002937000  |
| C | -2.657645000 | 3.050715000  | 0.158848000  |
| C | -1.672664000 | 1.365973000  | -1.276777000 |
| O | 1.165638000  | 4.759100000  | 0.526522000  |
| H | 5.399527000  | -1.654690000 | -0.163420000 |
| O | -3.698155000 | 4.721345000  | 1.497380000  |
| O | 4.972931000  | -1.723312000 | -1.030581000 |
| H | 3.062519000  | -0.502405000 | 0.813267000  |
| C | -0.258694000 | 3.034520000  | -0.253568000 |
| O | -4.977489000 | 3.066097000  | 0.682668000  |
| C | -1.391726000 | 3.595485000  | 0.344601000  |
| C | -2.785286000 | 1.927507000  | -0.662279000 |
| H | 3.170906000  | -1.196252000 | -2.715511000 |
| H | 4.907176000  | 1.609436000  | -0.722714000 |
| H | 5.662177000  | -0.145016000 | -2.193038000 |
| H | 6.324690000  | 0.666827000  | 0.677309000  |
| H | 2.742438000  | 0.875107000  | -3.609874000 |
| C | -3.886230000 | 3.667924000  | 0.840427000  |
| C | -0.410056000 | 1.903839000  | -1.065248000 |
| H | 3.030354000  | 1.945873000  | 1.487942000  |
| H | 3.174959000  | 3.544113000  | -0.281783000 |
| H | 1.503857000  | 1.306509000  | 0.914738000  |
| H | 2.253467000  | 2.521639000  | -1.383883000 |
| H | -1.283613000 | 4.465784000  | 0.975430000  |
| H | -3.768046000 | 1.499872000  | -0.806603000 |
| H | -1.785324000 | 0.498769000  | -1.913764000 |
| H | 0.447065000  | 1.430832000  | -1.522562000 |

|   |             |              |              |
|---|-------------|--------------|--------------|
| O | 2.544745000 | 0.025352000  | -1.208185000 |
| C | 4.668420000 | 0.601731000  | -0.368672000 |
| C | 4.837261000 | -0.402545000 | -1.524918000 |
| C | 3.494926000 | -0.272226000 | -2.233947000 |
| C | 3.190052000 | 0.485193000  | -0.041511000 |

**9-TS- Ado**

|   |              |              |              |
|---|--------------|--------------|--------------|
| H | -1.801168000 | 0.069922000  | 1.471428000  |
| C | -2.626240000 | -0.537269000 | -1.722845000 |
| H | -1.613197000 | -0.665728000 | -2.098834000 |
| H | -3.254787000 | -1.350597000 | -2.075546000 |
| H | -3.012850000 | 0.402304000  | -2.122760000 |
| C | -2.699301000 | -0.501390000 | -0.215629000 |
| H | 0.514063000  | -0.772852000 | -1.204000000 |
| H | -0.089912000 | 1.418720000  | 1.009049000  |
| H | -1.617835000 | 3.258507000  | -1.891952000 |
| H | 0.526571000  | -1.074181000 | 0.528851000  |
| O | -3.642989000 | -0.998438000 | 0.393518000  |
| C | -0.639881000 | 1.709005000  | -1.162381000 |
| C | -0.481890000 | 0.713889000  | -0.029806000 |
| N | -1.703243000 | 0.131393000  | 0.466514000  |
| C | 0.645076000  | -0.297197000 | -0.227819000 |
| O | 0.141024000  | 1.681029000  | -2.116328000 |
| N | -1.643994000 | 2.611327000  | -1.118288000 |
| C | 2.048166000  | 0.297193000  | -0.132759000 |
| H | 2.143344000  | 1.164153000  | -0.783243000 |
| H | 2.264316000  | 0.598879000  | 0.892029000  |
| S | 3.291956000  | -0.944602000 | -0.623856000 |
| C | 4.797765000  | 0.023624000  | -0.321111000 |
| H | 5.647108000  | -0.605179000 | -0.584516000 |
| H | 4.810247000  | 0.920015000  | -0.941224000 |
| H | 4.871993000  | 0.303231000  | 0.729922000  |
| C | -2.557336000 | 2.930702000  | -0.032031000 |
| H | -3.396214000 | 2.236232000  | 0.019260000  |
| H | -2.045859000 | 2.938962000  | 0.926261000  |
| H | -2.950148000 | 3.928991000  | -0.209203000 |
| N | -0.430380000 | 5.855369000  | 0.488539000  |
| N | -2.452439000 | 6.708580000  | 0.971389000  |
| N | -2.694159000 | 6.705752000  | -2.725827000 |
| N | -0.591197000 | 5.837792000  | -1.949432000 |
| N | -4.368574000 | 7.459551000  | -1.309713000 |
| C | 0.851392000  | 5.186505000  | 0.632614000  |
| C | 1.610733000  | 5.523639000  | 1.920121000  |
| C | 1.275940000  | 4.326089000  | 2.833807000  |
| C | 1.167974000  | 3.169217000  | 1.828573000  |
| C | 0.265914000  | 2.046925000  | 2.229299000  |

|   |             |            |             |
|---|-------------|------------|-------------|
| C | -1.33466000 | 6.23730800 | 1.45782800  |
| C | -2.29576600 | 6.62263200 | -0.39922100 |
| C | -1.05189200 | 6.08711100 | -0.71932300 |
| C | -3.14201300 | 6.94118200 | -1.47942400 |
| C | -1.47443400 | 6.18117100 | -2.88579800 |
| O | 2.99248600  | 5.53359800 | 1.60781800  |
| O | 2.29529100  | 4.05206100 | 3.77620700  |
| O | 0.64844400  | 3.78008900 | 0.63352400  |
| H | 1.44159700  | 5.46438600 | -0.23940100 |
| H | 3.45984900  | 5.22061900 | 2.39723600  |
| H | 1.30455100  | 6.48119700 | 2.34856500  |
| H | 2.13108300  | 4.55831600 | 4.58062400  |
| H | 0.31529400  | 4.48574000 | 3.32860500  |
| H | 2.17977800  | 2.80228300 | 1.63174900  |
| H | -0.70814500 | 2.34762600 | 2.60623200  |
| H | 0.72792900  | 1.25269000 | 2.80684300  |
| H | -4.72831600 | 7.63448100 | -0.38800000 |
| H | -4.94554800 | 7.65740400 | -2.10911500 |
| H | -1.10999600 | 6.15245000 | 2.50820200  |
| H | -1.17076400 | 6.00921400 | -3.91288400 |

#### 10A-TS- Ado

|   |             |             |             |
|---|-------------|-------------|-------------|
| C | 2.01445600  | -0.19766700 | 0.50054900  |
| C | 2.36534000  | -0.73899000 | -0.87100000 |
| O | 2.08129500  | 0.10255700  | -1.88013200 |
| C | 0.75865000  | -0.97897400 | 1.01565300  |
| C | -0.46956500 | -0.81941800 | 0.17727500  |
| C | -0.87134500 | -1.65163500 | -0.83583700 |
| C | -1.44188000 | 0.23866900  | 0.23750700  |
| N | -2.02560400 | -1.17411100 | -1.41223500 |
| C | -2.40452600 | -0.01849800 | -0.77474300 |
| C | -1.60304800 | 1.36886600  | 1.05166200  |
| C | -3.49990400 | 0.81786100  | -0.99020600 |
| C | -2.69044200 | 2.20042100  | 0.84200600  |
| C | -3.62910900 | 1.92835500  | -0.17110500 |
| O | 2.82754600  | -1.84156000 | -1.05993900 |
| H | 0.56865100  | -0.63822700 | 2.03555000  |
| H | 1.03029000  | -2.03458200 | 1.07534900  |
| H | -0.41439400 | -2.55943300 | -1.19499800 |
| H | -0.88499400 | 1.58982100  | 1.83099700  |
| H | -2.82383600 | 3.07618200  | 1.46475400  |
| H | -4.22219200 | 0.60581100  | -1.76836900 |
| H | -4.46788000 | 2.59833900  | -0.31211200 |
| H | 2.84360300  | -0.50090600 | 1.14505600  |
| H | -2.52333500 | -1.61822800 | -2.16446100 |
| C | 1.85213200  | 1.29863300  | 0.56467100  |

|   |             |              |              |
|---|-------------|--------------|--------------|
| H | 1.106189000 | 1.715502000  | -0.103764000 |
| H | 1.756112000 | 1.676770000  | 1.579836000  |
| H | 2.996014000 | 1.857488000  | 0.132944000  |
| H | 2.301949000 | -0.340700000 | -2.716018000 |
| N | 2.917182000 | 6.255656000  | -1.568980000 |
| N | 3.229492000 | 7.609413000  | 0.193635000  |
| N | 2.510519000 | 10.164970000 | -2.391038000 |
| N | 2.443642000 | 7.931535000  | -3.277455000 |
| N | 2.990254000 | 10.654018000 | -0.174766000 |
| C | 2.816707000 | 5.036275000  | -2.375716000 |
| C | 4.068268000 | 4.797796000  | -3.228587000 |
| C | 4.887365000 | 3.857266000  | -2.327584000 |
| C | 3.792374000 | 3.013079000  | -1.662976000 |
| C | 4.134794000 | 2.417679000  | -0.338323000 |
| C | 3.206769000 | 6.369194000  | -0.229339000 |
| C | 2.940358000 | 8.360225000  | -0.928638000 |
| C | 2.741255000 | 7.535959000  | -2.034280000 |
| C | 2.811935000 | 9.744835000  | -1.149364000 |
| C | 2.347040000 | 9.256666000  | -3.360125000 |
| O | 3.671733000 | 4.133492000  | -4.415380000 |
| O | 5.763029000 | 3.015146000  | -3.057602000 |
| O | 2.681474000 | 3.932592000  | -1.511425000 |
| H | 1.937197000 | 5.140347000  | -3.012805000 |
| H | 4.393321000 | 3.532625000  | -4.654712000 |
| H | 4.586003000 | 5.733168000  | -3.455259000 |
| H | 6.605830000 | 3.466750000  | -3.184409000 |
| H | 5.429286000 | 4.437148000  | -1.576638000 |
| H | 3.498733000 | 2.226510000  | -2.363718000 |
| H | 4.412068000 | 3.140171000  | 0.426864000  |
| H | 4.830337000 | 1.584720000  | -0.404178000 |
| H | 3.148381000 | 10.359966000 | 0.772982000  |
| H | 2.826105000 | 11.627871000 | -0.363998000 |
| H | 3.373273000 | 5.495740000  | 0.377241000  |
| H | 2.104681000 | 9.657670000  | -4.338692000 |

### 10B-TS- Ado

|   |              |              |              |
|---|--------------|--------------|--------------|
| C | 0.489471000  | 2.340811000  | -0.852706000 |
| C | -0.158015000 | 3.562379000  | -0.149746000 |
| O | -0.336500000 | 3.514558000  | 1.090717000  |
| C | -0.594594000 | 1.558227000  | -1.652647000 |
| C | -1.709514000 | 0.971918000  | -0.844480000 |
| C | -2.927744000 | 1.549861000  | -0.601618000 |
| C | -1.722951000 | -0.288984000 | -0.152228000 |
| N | -3.692911000 | 0.734123000  | 0.204916000  |
| C | -2.983648000 | -0.404337000 | 0.494076000  |
| C | -0.801677000 | -1.338042000 | -0.023239000 |

|   |              |              |              |
|---|--------------|--------------|--------------|
| C | -3.331603000 | -1.520662000 | 1.254855000  |
| C | -1.144337000 | -2.449692000 | 0.729340000  |
| C | -2.397342000 | -2.539110000 | 1.364838000  |
| O | -0.464631000 | 4.523983000  | -0.906483000 |
| H | -0.093132000 | 0.762291000  | -2.211933000 |
| H | -1.010652000 | 2.249917000  | -2.388471000 |
| H | -3.311065000 | 2.498432000  | -0.940759000 |
| H | 0.166472000  | -1.276132000 | -0.503464000 |
| H | -0.439027000 | -3.264775000 | 0.834725000  |
| H | -4.297232000 | -1.587961000 | 1.740467000  |
| H | -2.636072000 | -3.419328000 | 1.948611000  |
| H | 1.170200000  | 2.748700000  | -1.604152000 |
| H | -4.631229000 | 0.931303000  | 0.506261000  |
| C | 1.289266000  | 1.469597000  | 0.076905000  |
| H | 0.755207000  | 1.114685000  | 0.953378000  |
| H | 1.860794000  | 0.682416000  | -0.415203000 |
| H | 2.228612000  | 2.270221000  | 0.585182000  |
| N | 3.660931000  | 5.568450000  | -2.398034000 |
| N | 1.951452000  | 7.018711000  | -2.488407000 |
| N | 4.320225000  | 8.770717000  | -4.734024000 |
| N | 5.223781000  | 6.710119000  | -3.888182000 |
| N | 2.217716000  | 9.576850000  | -4.172869000 |
| C | 4.449556000  | 4.370026000  | -2.079683000 |
| C | 5.693343000  | 4.704586000  | -1.249564000 |
| C | 5.177827000  | 4.488978000  | 0.181709000  |
| C | 4.215808000  | 3.305597000  | 0.013220000  |
| C | 3.117490000  | 3.212617000  | 1.018246000  |
| C | 2.382804000  | 5.882962000  | -1.992212000 |
| C | 2.993818000  | 7.476105000  | -3.268710000 |
| C | 4.062865000  | 6.583310000  | -3.233070000 |
| C | 3.161904000  | 8.623030000  | -4.066718000 |
| C | 5.261566000  | 7.827293000  | -4.610625000 |
| O | 6.700365000  | 3.758590000  | -1.567918000 |
| O | 6.207004000  | 4.144466000  | 1.094821000  |
| O | 3.659577000  | 3.493226000  | -1.315996000 |
| H | 4.735557000  | 3.901789000  | -3.023278000 |
| H | 7.200923000  | 3.600183000  | -0.753569000 |
| H | 6.041814000  | 5.723278000  | -1.431083000 |
| H | 6.600279000  | 4.951466000  | 1.447442000  |
| H | 4.630028000  | 5.373235000  | 0.516433000  |
| H | 4.811640000  | 2.386537000  | 0.008384000  |
| H | 2.492466000  | 4.099533000  | 1.088920000  |
| H | 3.447098000  | 2.846818000  | 1.987486000  |
| H | 1.312469000  | 9.439866000  | -3.758450000 |
| H | 2.344040000  | 10.330324000 | -4.826844000 |
| H | 1.805251000  | 5.228067000  | -1.359835000 |

|   |             |             |              |
|---|-------------|-------------|--------------|
| H | 6.171889000 | 8.000410000 | -5.175094000 |
|---|-------------|-------------|--------------|

**11A-TS- Ado**

|   |              |              |              |
|---|--------------|--------------|--------------|
| C | -2.194579000 | 0.220274000  | 1.096612000  |
| C | -2.769718000 | -0.886821000 | 0.231250000  |
| O | -3.257420000 | -0.427694000 | -0.937953000 |
| C | -0.932306000 | 0.858000000  | 0.507928000  |
| C | 0.249844000  | 0.043162000  | 0.220975000  |
| C | 0.365575000  | -1.318714000 | 0.041219000  |
| C | 1.556261000  | 0.590344000  | -0.058401000 |
| N | 1.650203000  | -1.636619000 | -0.331633000 |
| C | 2.404925000  | -0.490688000 | -0.403317000 |
| C | 2.076115000  | 1.890072000  | -0.065233000 |
| C | 3.742913000  | -0.305597000 | -0.747477000 |
| C | 3.405347000  | 2.081006000  | -0.409210000 |
| C | 4.230107000  | 0.992939000  | -0.747009000 |
| O | -2.823928000 | -2.057151000 | 0.530799000  |
| H | -0.675600000 | 1.740269000  | 1.096045000  |
| H | -1.267877000 | 1.448166000  | -0.587284000 |
| H | -0.370352000 | -2.095262000 | 0.154598000  |
| H | 1.448763000  | 2.735764000  | 0.188079000  |
| H | 3.818362000  | 3.081795000  | -0.420346000 |
| H | 4.375483000  | -1.144300000 | -1.009321000 |
| H | 5.264294000  | 1.172436000  | -1.012438000 |
| H | -2.958299000 | 1.004020000  | 1.101121000  |
| H | 1.987400000  | -2.569826000 | -0.493851000 |
| C | -1.976773000 | -0.267060000 | 2.531733000  |
| H | -1.228210000 | -1.057531000 | 2.565188000  |
| H | -1.631010000 | 0.561723000  | 3.150145000  |
| H | -2.902690000 | -0.654243000 | 2.958463000  |
| H | -3.619440000 | -1.185406000 | -1.426465000 |
| N | -1.066455000 | -0.376376000 | -4.964736000 |
| N | -3.110051000 | -1.231649000 | -5.323925000 |
| N | -1.407913000 | -2.472385000 | -8.372454000 |
| N | 0.063161000  | -1.190865000 | -6.967956000 |
| N | -3.632568000 | -2.887549000 | -7.863285000 |
| C | 0.033593000  | 0.345487000  | -4.316001000 |
| C | 0.296020000  | 1.707381000  | -4.966011000 |
| C | -0.576234000 | 2.635096000  | -4.103342000 |
| C | -0.439005000 | 2.003283000  | -2.708751000 |
| C | -1.564485000 | 2.249735000  | -1.764969000 |
| C | -2.358057000 | -0.523490000 | -4.516988000 |
| C | -2.269168000 | -1.572722000 | -6.365072000 |
| C | -0.993245000 | -1.051240000 | -6.158409000 |
| C | -2.456470000 | -2.319313000 | -7.543982000 |
| C | -0.236487000 | -1.914666000 | -8.044218000 |

|   |              |              |              |
|---|--------------|--------------|--------------|
| O | 1.669177000  | 2.015174000  | -4.800554000 |
| O | -0.099744000 | 3.969525000  | -4.069061000 |
| O | -0.315998000 | 0.583586000  | -2.976057000 |
| H | 0.920299000  | -0.287084000 | -4.377947000 |
| H | 1.728259000  | 2.974388000  | -4.676620000 |
| H | 0.015400000  | 1.713335000  | -6.022270000 |
| H | -0.471965000 | 4.459504000  | -4.811768000 |
| H | -1.614907000 | 2.592276000  | -4.440159000 |
| H | 0.503184000  | 2.353948000  | -2.277353000 |
| H | -2.533618000 | 1.872748000  | -2.076832000 |
| H | -1.590006000 | 3.256791000  | -1.358795000 |
| H | -4.443935000 | -2.736684000 | -7.290125000 |
| H | -3.735643000 | -3.363635000 | -8.742960000 |
| H | -2.668173000 | -0.094939000 | -3.579582000 |
| H | 0.570379000  | -2.074937000 | -8.751636000 |

### 11B-TS- Ado

|   |              |              |              |
|---|--------------|--------------|--------------|
| C | -2.274973000 | 0.164510000  | 0.842203000  |
| C | -2.810179000 | -0.813083000 | -0.246070000 |
| O | -3.355677000 | -0.278785000 | -1.247679000 |
| C | -0.961180000 | 0.840504000  | 0.447634000  |
| C | 0.254899000  | 0.055297000  | 0.215393000  |
| C | 0.399993000  | -1.296568000 | -0.001427000 |
| C | 1.568827000  | 0.626602000  | 0.042010000  |
| N | 1.714401000  | -1.589076000 | -0.293651000 |
| C | 2.456396000  | -0.433226000 | -0.276466000 |
| C | 2.067660000  | 1.933232000  | 0.098581000  |
| C | 3.810994000  | -0.219020000 | -0.524869000 |
| C | 3.414137000  | 2.153340000  | -0.151390000 |
| C | 4.277316000  | 1.086458000  | -0.459068000 |
| O | -2.671420000 | -2.047251000 | -0.056565000 |
| H | -0.758548000 | 1.689298000  | 1.106363000  |
| H | -1.183026000 | 1.484060000  | -0.638981000 |
| H | -0.354523000 | -2.064310000 | 0.018474000  |
| H | 1.409265000  | 2.762470000  | 0.327134000  |
| H | 3.810235000  | 3.160493000  | -0.112433000 |
| H | 4.473177000  | -1.040812000 | -0.767517000 |
| H | 5.324041000  | 1.287276000  | -0.650375000 |
| H | -3.017130000 | 0.966712000  | 0.893668000  |
| H | 2.075181000  | -2.511271000 | -0.465815000 |
| C | -2.174265000 | -0.480571000 | 2.228633000  |
| H | -1.457421000 | -1.300371000 | 2.225234000  |
| H | -1.854546000 | 0.254797000  | 2.972037000  |
| H | -3.140511000 | -0.882568000 | 2.540436000  |
| N | -1.011872000 | -0.406179000 | -4.861963000 |
| N | -3.029722000 | -1.376366000 | -4.995687000 |



|   |              |              |              |
|---|--------------|--------------|--------------|
| N | -1.732597000 | -2.263016000 | -8.350935000 |
| N | -0.144004000 | -0.995021000 | -7.067825000 |
| N | -3.847665000 | -2.828823000 | -7.579799000 |
| C | 0.149353000  | 0.305537000  | -4.304920000 |
| C | 0.402691000  | 1.632584000  | -5.023121000 |
| C | -0.436971000 | 2.601110000  | -4.176102000 |
| C | -0.278718000 | 2.032826000  | -2.755463000 |
| C | -1.419002000 | 2.287523000  | -1.831943000 |
| C | -2.209061000 | -0.683990000 | -4.238910000 |
| C | -2.337875000 | -1.572022000 | -6.173953000 |
| C | -1.076791000 | -0.982211000 | -6.106928000 |
| C | -2.654853000 | -2.237203000 | -7.372454000 |
| C | -0.557331000 | -1.655721000 | -8.146663000 |
| O | 1.783615000  | 1.934704000  | -4.910920000 |
| O | 0.050930000  | 3.933430000  | -4.211935000 |
| O | -0.100660000 | 0.604465000  | -2.959717000 |
| H | 1.014864000  | -0.353586000 | -4.391375000 |
| H | 1.850873000  | 2.896736000  | -4.817128000 |
| H | 0.092977000  | 1.597125000  | -6.069828000 |
| H | -0.332109000 | 4.390585000  | -4.969941000 |
| H | -1.483098000 | 2.555509000  | -4.487960000 |
| H | 0.651524000  | 2.428402000  | -2.336716000 |
| H | -2.375869000 | 1.881766000  | -2.142728000 |
| H | -1.457666000 | 3.301098000  | -1.442365000 |
| H | -4.501046000 | -2.919652000 | -6.821376000 |
| H | -3.984521000 | -3.387902000 | -8.404656000 |
| H | -2.412759000 | -0.373757000 | -3.222758000 |
| H | 0.146413000  | -1.712898000 | -8.970571000 |

### 12A-TS- Ado

|   |              |              |              |
|---|--------------|--------------|--------------|
| N | -2.053545000 | -0.061990000 | 0.185586000  |
| N | -2.444584000 | -1.576535000 | 1.793807000  |
| N | -5.619241000 | -1.888472000 | -0.091129000 |
| N | -4.141052000 | -0.260123000 | -1.061371000 |
| N | -5.114641000 | -3.104513000 | 1.818858000  |
| C | -1.403902000 | 0.979133000  | -0.609883000 |
| C | -1.943489000 | 2.379643000  | -0.296040000 |
| C | -0.921541000 | 2.890597000  | 0.733980000  |
| C | 0.386489000  | 2.277897000  | 0.214095000  |
| C | 1.474017000  | 2.107660000  | 1.217859000  |
| C | -1.593316000 | -0.702099000 | 1.315476000  |
| C | -3.527940000 | -1.510100000 | 0.940510000  |
| C | -3.302807000 | -0.575977000 | -0.067605000 |
| C | -4.761884000 | -2.187089000 | 0.901467000  |
| C | -5.268382000 | -0.965247000 | -0.993919000 |
| O | -1.883998000 | 3.149356000  | -1.483249000 |

|   |              |              |              |
|---|--------------|--------------|--------------|
| O | -0.812304000 | 4.301750000  | 0.752669000  |
| O | -0.023362000 | 0.987726000  | -0.309037000 |
| H | -1.566945000 | 0.736892000  | -1.660645000 |
| H | -1.705872000 | 4.063817000  | -1.216923000 |
| H | -2.962157000 | 2.337919000  | 0.097005000  |
| H | -1.454641000 | 4.662651000  | 1.375085000  |
| H | -1.156796000 | 2.493719000  | 1.724519000  |
| H | 0.736054000  | 2.895349000  | -0.620715000 |
| H | 1.271819000  | 1.383612000  | 2.003118000  |
| H | 1.871561000  | 3.050393000  | 1.584212000  |
| H | -4.465665000 | -3.387352000 | 2.531952000  |
| H | -5.980676000 | -3.605419000 | 1.717910000  |
| H | -0.612112000 | -0.511064000 | 1.717891000  |
| H | -6.001444000 | -0.768954000 | -1.769274000 |
| O | 5.332593000  | -0.900643000 | -1.067686000 |
| H | 2.568706000  | 1.597125000  | 0.507548000  |
| N | 3.748734000  | -2.192941000 | -2.015473000 |
| C | 3.026727000  | -0.213250000 | -0.744217000 |
| C | 3.889336000  | -1.322531000 | 1.978256000  |
| H | 4.597535000  | 3.156159000  | -0.810689000 |
| C | 2.459278000  | -1.295113000 | 1.500545000  |
| N | 2.179368000  | -0.908277000 | 0.227494000  |
| H | 4.066540000  | -0.413543000 | 2.557830000  |
| C | 4.146986000  | -1.132094000 | -1.289033000 |
| H | 1.191653000  | -0.766135000 | 0.067386000  |
| H | 2.354163000  | -0.005668000 | -1.578446000 |
| H | 4.501236000  | -2.792190000 | -2.321189000 |
| H | 4.007567000  | -2.171380000 | 2.648760000  |
| H | 4.384604000  | 1.021281000  | 0.458692000  |
| O | 1.539177000  | -1.608121000 | 2.255833000  |
| H | 4.628624000  | -1.370935000 | 1.184225000  |
| C | 3.547957000  | 1.117246000  | -0.226032000 |
| C | 2.389941000  | -2.600612000 | -2.346433000 |
| H | 1.863118000  | -2.995320000 | -1.477242000 |
| H | 1.815404000  | -1.770490000 | -2.757871000 |
| H | 2.447002000  | -3.375622000 | -3.106706000 |
| S | 3.886821000  | 2.284155000  | -1.542869000 |

### 12B-TS- Ado

|   |              |              |              |
|---|--------------|--------------|--------------|
| O | 0.916180000  | -1.799878000 | 0.010522000  |
| H | -0.997713000 | 1.938378000  | 0.461462000  |
| N | 2.720160000  | -0.457718000 | -0.121346000 |
| C | 0.483982000  | 0.526381000  | -0.471984000 |
| C | -2.185239000 | -0.976208000 | 0.035908000  |
| H | 0.789183000  | 2.083964000  | 2.323311000  |
| C | -1.793968000 | -0.353615000 | -1.280586000 |

|   |              |              |              |
|---|--------------|--------------|--------------|
| N | -0.564404000 | 0.201372000  | -1.430186000 |
| H | -2.639659000 | -0.209601000 | 0.667334000  |
| C | 1.394792000  | -0.684093000 | -0.184463000 |
| H | -0.457230000 | 0.666208000  | -2.318703000 |
| H | 1.058342000  | 1.311821000  | -0.958058000 |
| H | 3.267932000  | -1.279346000 | 0.088649000  |
| H | -2.938156000 | -1.735780000 | -0.161935000 |
| H | -0.460089000 | 0.443608000  | 1.533492000  |
| O | -2.587192000 | -0.325900000 | -2.224248000 |
| H | -1.339010000 | -1.417069000 | 0.553904000  |
| O | 0.990883000  | 1.924112000  | 1.394063000  |
| C | -0.018837000 | 1.144778000  | 0.826743000  |
| C | 3.447015000  | 0.771545000  | -0.425040000 |
| H | 3.354009000  | 1.044013000  | -1.478331000 |
| H | 3.101335000  | 1.596018000  | 0.194311000  |
| H | 4.498690000  | 0.597084000  | -0.211451000 |
| N | -1.198141000 | 3.501933000  | -4.108790000 |
| N | -2.665301000 | 2.228708000  | -5.231458000 |
| N | -1.348875000 | 4.235667000  | -8.054144000 |
| N | -0.325056000 | 4.827711000  | -5.961437000 |
| N | -2.988191000 | 2.608121000  | -8.267354000 |
| C | -0.415239000 | 4.077478000  | -3.012976000 |
| C | -0.947331000 | 5.445867000  | -2.571282000 |
| C | -1.857596000 | 5.064780000  | -1.391349000 |
| C | -1.094262000 | 3.890462000  | -0.762817000 |
| C | -1.910026000 | 2.926988000  | 0.029170000  |
| C | -2.145723000 | 2.503910000  | -4.059658000 |
| C | -2.031138000 | 3.091056000  | -6.103336000 |
| C | -1.112813000 | 3.888697000  | -5.424470000 |
| C | -2.133458000 | 3.298688000  | -7.492171000 |
| C | -0.509705000 | 4.929189000  | -7.275942000 |
| O | 0.151214000  | 6.220956000  | -2.125112000 |
| O | -1.996756000 | 6.105142000  | -0.440233000 |
| O | -0.493500000 | 3.217445000  | -1.898569000 |
| H | 0.614986000  | 4.165878000  | -3.360469000 |
| H | -0.175148000 | 6.781721000  | -1.405391000 |
| H | -1.482594000 | 5.949539000  | -3.379879000 |
| H | -2.735493000 | 6.671082000  | -0.693507000 |
| H | -2.829772000 | 4.729573000  | -1.760712000 |
| H | -0.293300000 | 4.307240000  | -0.142558000 |
| H | -2.665647000 | 2.388396000  | -0.537855000 |
| H | -2.278342000 | 3.335256000  | 0.966317000  |
| H | -3.534274000 | 1.858667000  | -7.880340000 |
| H | -2.981267000 | 2.744559000  | -9.263585000 |
| H | -2.389807000 | 1.997502000  | -3.140678000 |
| H | 0.096473000  | 5.669403000  | -7.787570000 |

**13A-TS- Ado**

|   |              |              |              |
|---|--------------|--------------|--------------|
| H | -2.566423000 | -1.505689000 | 1.965260000  |
| H | -3.892377000 | -5.951164000 | -2.362607000 |
| H | -2.933495000 | -5.114713000 | -3.535897000 |
| C | -3.004181000 | 2.361842000  | 0.902285000  |
| O | 1.148629000  | 0.109916000  | 2.437572000  |
| O | -0.192423000 | -2.388432000 | 1.857110000  |
| C | -2.386029000 | 1.094168000  | 1.473609000  |
| O | -1.224649000 | -1.239519000 | -1.634650000 |
| H | -3.593078000 | -3.223364000 | 1.459649000  |
| H | -4.212054000 | -5.067859000 | -0.075087000 |
| C | -1.932956000 | -2.181909000 | -1.287541000 |
| N | -2.434004000 | -2.230477000 | 0.048080000  |
| O | -2.778927000 | 3.453627000  | 1.382366000  |
| O | -3.810028000 | 2.164748000  | -0.132752000 |
| C | -2.075781000 | -1.216557000 | 1.029254000  |
| O | -0.626169000 | 2.329413000  | 2.667225000  |
| C | -0.574082000 | -1.140832000 | 1.292240000  |
| C | -0.253308000 | 0.008306000  | 2.249385000  |
| C | -3.038750000 | -4.194345000 | -1.722646000 |
| C | -0.890061000 | 1.301346000  | 1.777953000  |
| O | -2.592050000 | 0.023377000  | 0.578879000  |
| N | -3.316006000 | -5.165304000 | -2.606617000 |
| N | -2.265902000 | -3.195059000 | -2.123145000 |
| C | -3.240537000 | -3.257068000 | 0.438926000  |
| C | -3.574478000 | -4.260070000 | -0.398734000 |
| H | -2.909583000 | 0.916242000  | 2.428330000  |
| H | -0.382123000 | 1.583580000  | 0.579267000  |
| H | -0.666087000 | -0.233400000 | 3.237149000  |
| H | -0.060777000 | -0.965708000 | 0.349379000  |
| H | -1.207744000 | 3.075329000  | 2.436337000  |
| H | 0.728563000  | -2.307833000 | 2.137172000  |
| H | 1.541952000  | 0.335220000  | 1.572897000  |
| H | -4.166114000 | 3.024460000  | -0.416850000 |
| N | 2.572882000  | -1.652764000 | -0.760019000 |
| N | 1.548821000  | -3.633978000 | -1.022183000 |
| N | 3.732058000  | -4.487497000 | 1.847704000  |
| N | 4.015821000  | -2.210670000 | 1.132939000  |
| N | 2.266829000  | -5.974239000 | 0.833948000  |
| C | 2.871889000  | -0.243243000 | -0.884757000 |
| C | 2.947317000  | 0.282783000  | -2.324496000 |
| C | 1.602206000  | 1.012280000  | -2.495045000 |
| C | 1.324762000  | 1.560566000  | -1.088860000 |
| C | -0.118225000 | 1.812469000  | -0.787830000 |
| C | 1.641697000  | -2.403704000 | -1.451057000 |

|   |              |              |              |
|---|--------------|--------------|--------------|
| C | 2.453953000  | -3.709595000 | 0.020631000  |
| C | 3.096896000  | -2.489581000 | 0.204336000  |
| C | 2.808922000  | -4.746248000 | 0.903998000  |
| C | 4.271281000  | -3.264778000 | 1.905791000  |
| O | 4.023882000  | 1.202137000  | -2.393731000 |
| O | 1.672463000  | 2.079441000  | -3.424106000 |
| O | 1.848637000  | 0.511671000  | -0.229132000 |
| H | 3.823764000  | -0.085289000 | -0.379965000 |
| H | 3.764539000  | 1.884734000  | -3.031427000 |
| H | 3.083535000  | -0.527383000 | -3.045307000 |
| H | 1.469067000  | 1.747626000  | -4.306579000 |
| H | 0.818336000  | 0.300019000  | -2.763130000 |
| H | 1.925102000  | 2.462288000  | -0.938911000 |
| H | -0.801473000 | 1.080752000  | -1.208551000 |
| H | -0.432452000 | 2.842606000  | -0.926260000 |
| H | 1.524049000  | -6.165583000 | 0.184677000  |
| H | 2.497283000  | -6.662279000 | 1.530168000  |
| H | 1.038875000  | -1.977021000 | -2.234723000 |
| H | 5.009066000  | -3.116095000 | 2.687028000  |

**13B-TS- Ado**

|   |              |              |              |
|---|--------------|--------------|--------------|
| H | -0.159376000 | -1.807155000 | -0.449715000 |
| H | 5.660323000  | 1.044860000  | -1.500148000 |
| H | 5.943099000  | -0.615015000 | -1.098887000 |
| C | -2.105382000 | 1.846473000  | -0.300641000 |
| O | -2.544417000 | 0.073465000  | 2.386541000  |
| O | 0.326246000  | -1.165175000 | 2.156504000  |
| C | -2.083297000 | 0.411896000  | -0.834137000 |
| O | 1.934417000  | -2.530890000 | 0.299355000  |
| H | 1.005233000  | 1.546381000  | -0.875408000 |
| H | 3.415759000  | 2.060841000  | -1.315188000 |
| C | 2.331259000  | -1.462103000 | -0.192235000 |
| N | 1.386346000  | -0.441808000 | -0.431446000 |
| O | -3.357797000 | 2.315512000  | -0.256294000 |
| O | -1.132778000 | 2.487985000  | 0.005866000  |
| C | -0.036425000 | -0.746124000 | -0.228924000 |
| O | -2.878332000 | -1.844764000 | -0.520337000 |
| C | -0.466866000 | -0.463102000 | 1.215532000  |
| C | -1.965079000 | -0.781943000 | 1.403069000  |
| C | 4.006410000  | -0.017012000 | -0.902847000 |
| C | -2.728177000 | -0.605283000 | 0.103353000  |
| O | -0.754769000 | 0.026836000  | -1.175102000 |
| N | 5.304344000  | 0.156468000  | -1.194700000 |
| N | 3.621669000  | -1.223503000 | -0.496954000 |
| C | 1.787576000  | 0.807222000  | -0.789205000 |
| C | 3.091866000  | 1.073355000  | -1.025217000 |

|   |              |              |              |
|---|--------------|--------------|--------------|
| H | -2.644264000 | 0.421684000  | -1.770834000 |
| H | -3.956890000 | -0.194214000 | 0.374128000  |
| H | -2.053207000 | -1.831061000 | 1.699171000  |
| H | -0.328171000 | 0.605448000  | 1.397700000  |
| H | -3.534544000 | -1.733656000 | -1.231034000 |
| H | 0.786232000  | -1.894940000 | 1.700669000  |
| H | -2.027563000 | -0.007605000 | 3.198261000  |
| H | -3.344334000 | 3.227348000  | 0.079059000  |
| N | -6.096834000 | -2.522008000 | -3.044718000 |
| N | -6.476959000 | -4.625813000 | -2.360995000 |
| N | -6.288490000 | -5.223299000 | -6.012830000 |
| N | -5.975825000 | -2.906790000 | -5.452910000 |
| N | -6.677612000 | -6.882191000 | -4.439430000 |
| C | -5.903214000 | -1.081441000 | -3.002093000 |
| C | -7.203801000 | -0.280721000 | -2.844585000 |
| C | -7.238889000 | 0.007292000  | -1.332013000 |
| C | -5.752746000 | 0.189243000  | -1.001100000 |
| C | -5.344005000 | -0.070526000 | 0.408871000  |
| C | -6.313462000 | -3.382135000 | -1.990167000 |
| C | -6.369677000 | -4.592387000 | -3.738071000 |
| C | -6.132704000 | -3.294198000 | -4.183175000 |
| C | -6.446625000 | -5.590598000 | -4.728572000 |
| C | -6.066270000 | -3.934477000 | -6.294462000 |
| O | -7.064245000 | 0.923606000  | -3.576227000 |
| O | -7.945685000 | 1.191654000  | -1.013662000 |
| O | -5.092454000 | -0.767534000 | -1.879597000 |
| H | -5.404095000 | -0.803745000 | -3.930088000 |
| H | -7.561881000 | 1.603233000  | -3.096869000 |
| H | -8.068768000 | -0.853836000 | -3.188278000 |
| H | -8.878838000 | 0.981966000  | -0.888481000 |
| H | -7.644595000 | -0.853235000 | -0.794774000 |
| H | -5.455746000 | 1.196275000  | -1.303200000 |
| H | -5.642440000 | -1.037316000 | 0.808220000  |
| H | -5.513509000 | 0.758942000  | 1.086299000  |
| H | -6.758364000 | -7.186180000 | -3.485181000 |
| H | -6.686796000 | -7.567062000 | -5.175614000 |
| H | -6.315434000 | -3.029932000 | -0.972126000 |
| H | -5.945799000 | -3.701141000 | -7.347089000 |

### 13C-TS- Ado

|   |              |              |              |
|---|--------------|--------------|--------------|
| H | -0.543136000 | -0.351642000 | -1.625989000 |
| H | -6.102616000 | -1.279115000 | 1.269844000  |
| H | -5.428953000 | -0.742505000 | 2.771190000  |
| C | 2.705960000  | -2.190491000 | -0.084186000 |
| O | 1.999049000  | 2.680749000  | -0.882027000 |
| O | -0.818244000 | 2.125056000  | -1.093571000 |

|   |              |              |              |
|---|--------------|--------------|--------------|
| C | 1.776856000  | -1.097473000 | -0.676164000 |
| O | -0.944909000 | 0.298107000  | 2.147780000  |
| H | -2.483873000 | -1.014617000 | -1.725576000 |
| H | -4.744102000 | -1.418294000 | -0.790158000 |
| C | -1.883560000 | -0.100627000 | 1.463807000  |
| N | -1.685615000 | -0.355069000 | 0.075339000  |
| O | 3.888630000  | -2.139233000 | -0.542682000 |
| O | 2.257517000  | -2.997185000 | 0.740853000  |
| C | -0.388179000 | -0.150957000 | -0.558715000 |
| O | 3.659790000  | 0.366639000  | -1.204254000 |
| C | 0.132418000  | 1.285287000  | -0.445107000 |
| C | 1.495173000  | 1.366330000  | -1.115424000 |
| C | -4.113803000 | -0.759912000 | 1.215343000  |
| C | 2.417218000  | 0.288700000  | -0.594551000 |
| O | 0.515255000  | -1.088871000 | -0.018739000 |
| N | -5.312762000 | -0.944286000 | 1.792429000  |
| N | -3.123797000 | -0.313668000 | 1.973657000  |
| C | -2.710891000 | -0.827649000 | -0.685755000 |
| C | -3.940403000 | -1.046284000 | -0.174168000 |
| H | 1.637514000  | -1.352764000 | -1.740551000 |
| H | 2.529039000  | 0.523971000  | 0.694232000  |
| H | 1.361750000  | 1.213520000  | -2.198604000 |
| H | 0.232955000  | 1.552402000  | 0.605373000  |
| H | 4.046768000  | -0.542495000 | -1.068064000 |
| H | -0.442892000 | 3.013860000  | -1.127138000 |
| H | 2.871502000  | 2.738238000  | -1.291176000 |
| N | 6.570563000  | 1.248663000  | 3.369806000  |
| N | 6.914287000  | 3.461203000  | 3.525607000  |
| N | 10.096956000 | 2.266654000  | 4.999225000  |
| N | 8.662450000  | 0.453163000  | 4.341818000  |
| N | 9.534101000  | 4.503753000  | 4.754168000  |
| C | 5.914757000  | -0.031413000 | 3.088364000  |
| C | 5.251121000  | -0.634356000 | 4.333211000  |
| C | 3.800780000  | -0.144965000 | 4.183817000  |
| C | 3.601262000  | -0.186670000 | 2.661522000  |
| C | 2.553608000  | 0.715422000  | 2.110240000  |
| C | 6.088788000  | 2.516818000  | 3.145267000  |
| C | 8.003294000  | 2.780624000  | 4.033339000  |
| C | 7.808473000  | 1.403628000  | 3.944088000  |
| C | 9.221987000  | 3.205184000  | 4.595958000  |
| C | 9.775124000  | 0.975921000  | 4.852120000  |
| O | 5.315605000  | -2.046139000 | 4.228517000  |
| O | 2.861623000  | -1.001432000 | 4.811923000  |
| O | 4.902781000  | 0.182495000  | 2.134324000  |
| H | 6.680493000  | -0.706805000 | 2.703467000  |
| H | 4.499034000  | -2.392379000 | 4.619078000  |

|   |              |              |             |
|---|--------------|--------------|-------------|
| H | 5.729742000  | -0.287375000 | 5.252634000 |
| H | 2.758005000  | -0.737487000 | 5.733714000 |
| H | 3.710598000  | 0.880229000  | 4.551170000 |
| H | 3.391221000  | -1.224852000 | 2.383892000 |
| H | 2.749757000  | 1.778320000  | 2.235107000 |
| H | 1.538835000  | 0.426706000  | 2.367848000 |
| H | 8.925057000  | 5.220426000  | 4.400504000 |
| H | 10.441753000 | 4.760719000  | 5.102408000 |
| H | 5.129551000  | 2.670550000  | 2.681677000 |
| H | 10.521673000 | 0.267474000  | 5.195549000 |

### 13D-TS- Ado

|   |              |              |              |
|---|--------------|--------------|--------------|
| H | 0.115955000  | -1.818201000 | 0.787821000  |
| H | -5.986410000 | 0.599989000  | 0.963092000  |
| H | -6.091279000 | -1.096431000 | 0.637425000  |
| C | 1.634474000  | 2.134509000  | 0.594105000  |
| O | 2.646428000  | 0.030607000  | -1.944948000 |
| O | -0.063597000 | -1.345796000 | -1.878558000 |
| C | 1.752467000  | 0.708689000  | 1.224949000  |
| O | -1.810967000 | -2.748845000 | -0.163815000 |
| H | -1.321821000 | 1.441046000  | 0.838504000  |
| H | -3.817150000 | 1.786841000  | 0.965551000  |
| C | -2.340897000 | -1.689934000 | 0.213975000  |
| N | -1.514428000 | -0.587976000 | 0.502766000  |
| O | 2.701571000  | 2.784445000  | 0.613215000  |
| O | 0.514592000  | 2.500851000  | 0.171377000  |
| C | -0.049846000 | -0.775853000 | 0.507079000  |
| O | 2.927628000  | -1.412864000 | 1.211066000  |
| C | 0.533806000  | -0.521195000 | -0.885519000 |
| C | 2.057032000  | -0.705517000 | -0.870074000 |
| C | -4.194360000 | -0.351444000 | 0.630259000  |
| C | 2.642167000  | -0.254754000 | 0.460147000  |
| O | 0.478512000  | 0.076786000  | 1.493555000  |
| N | -5.529472000 | -0.270809000 | 0.758458000  |
| N | -3.675002000 | -1.543357000 | 0.349711000  |
| C | -2.044357000 | 0.642455000  | 0.726584000  |
| C | -3.386092000 | 0.813971000  | 0.786087000  |
| H | 2.182580000  | 0.865886000  | 2.216564000  |
| H | 3.795369000  | 0.322999000  | 0.218574000  |
| H | 2.275837000  | -1.771484000 | -0.982403000 |
| H | 0.325491000  | 0.518992000  | -1.142157000 |
| H | 3.134932000  | -1.158481000 | 2.118827000  |
| H | -0.523436000 | -2.084717000 | -1.438616000 |
| H | 2.190011000  | -0.230917000 | -2.755063000 |
| N | 6.485189000  | -1.677322000 | -2.875846000 |
| N | 5.672346000  | -0.718147000 | -4.734709000 |



|   |             |              |              |
|---|-------------|--------------|--------------|
| N | 8.448369000 | -2.654384000 | -6.242069000 |
| N | 8.309468000 | -2.967345000 | -3.862841000 |
| N | 7.024062000 | -1.269572000 | -7.440881000 |
| C | 6.595055000 | -2.076077000 | -1.463078000 |
| C | 7.892667000 | -1.573561000 | -0.828920000 |
| C | 7.459851000 | -0.196490000 | -0.300929000 |
| C | 6.001617000 | -0.437254000 | 0.128235000  |
| C | 5.108106000 | 0.752587000  | 0.028534000  |
| C | 5.540325000 | -0.847664000 | -3.435693000 |
| C | 6.756904000 | -1.511351000 | -5.052513000 |
| C | 7.271041000 | -2.123487000 | -3.910413000 |
| C | 7.402956000 | -1.808728000 | -6.267064000 |
| C | 8.831364000 | -3.173943000 | -5.069586000 |
| O | 8.220524000 | -2.442580000 | 0.241606000  |
| O | 8.220378000 | 0.231925000  | 0.817154000  |
| O | 5.536413000 | -1.501249000 | -0.746233000 |
| H | 6.533091000 | -3.164342000 | -1.416655000 |
| H | 8.617221000 | -1.893698000 | 0.934540000  |
| H | 8.707726000 | -1.517628000 | -1.553614000 |
| H | 9.009296000 | 0.691651000  | 0.506055000  |
| H | 7.499735000 | 0.537609000  | -1.109188000 |
| H | 6.010152000 | -0.826533000 | 1.150821000  |
| H | 5.052676000 | 1.208716000  | -0.955649000 |
| H | 5.227719000 | 1.474138000  | 0.829719000  |
| H | 6.190543000 | -0.710762000 | -7.495053000 |
| H | 7.455919000 | -1.582663000 | -8.293456000 |
| H | 4.772850000 | -0.394469000 | -2.828619000 |
| H | 9.677806000 | -3.851297000 | -5.114133000 |

#### 14A-TS- Ado

|   |             |              |              |
|---|-------------|--------------|--------------|
| O | 5.819356000 | 0.368950000  | -1.991984000 |
| H | 2.311829000 | -0.189456000 | 0.858273000  |
| C | 4.251681000 | 0.116743000  | -0.195652000 |
| N | 3.752729000 | 1.447220000  | -0.521177000 |
| C | 5.297162000 | -0.409668000 | -1.224025000 |
| H | 4.553175000 | 2.058658000  | -0.627505000 |
| H | 4.831120000 | 0.205911000  | 0.730377000  |
| H | 2.478510000 | -1.069138000 | -0.781260000 |
| C | 3.111737000 | -0.851130000 | 0.072088000  |
| C | 3.333193000 | -2.070450000 | 0.870360000  |
| O | 2.690501000 | -3.094323000 | 0.754440000  |
| O | 4.279191000 | -1.918997000 | 1.825157000  |
| H | 4.326034000 | -2.741770000 | 2.337854000  |
| C | 5.677440000 | -1.864462000 | -1.190334000 |
| H | 5.932118000 | -2.169171000 | -0.173958000 |
| H | 4.827847000 | -2.475069000 | -1.506581000 |

|   |              |              |              |
|---|--------------|--------------|--------------|
| H | 6.518066000  | -2.043520000 | -1.856866000 |
| C | 2.932943000  | 1.536857000  | -1.734148000 |
| H | 2.730839000  | 2.589162000  | -1.934149000 |
| H | 3.407353000  | 1.104427000  | -2.623070000 |
| H | 1.973417000  | 1.044289000  | -1.580431000 |
| N | -2.274577000 | -0.082423000 | -0.148224000 |
| N | -3.103361000 | -2.020300000 | 0.622171000  |
| N | -6.149352000 | -0.684627000 | -1.011451000 |
| N | -4.274080000 | 0.803397000  | -1.228842000 |
| N | -6.056203000 | -2.714431000 | 0.106547000  |
| C | -1.332997000 | 1.001786000  | -0.437090000 |
| C | -1.584711000 | 2.238110000  | 0.432373000  |
| C | -0.613433000 | 2.003122000  | 1.603344000  |
| C | 0.579716000  | 1.346257000  | 0.892473000  |
| C | 1.439048000  | 0.479728000  | 1.742088000  |
| C | -2.044901000 | -1.252415000 | 0.538166000  |
| C | -4.089489000 | -1.321277000 | -0.045527000 |
| C | -3.592511000 | -0.115135000 | -0.534470000 |
| C | -5.445007000 | -1.593353000 | -0.313135000 |
| C | -5.538611000 | 0.433660000  | -1.420082000 |
| O | -1.203710000 | 3.381013000  | -0.311513000 |
| O | -0.197021000 | 3.203013000  | 2.227657000  |
| O | -0.027427000 | 0.551430000  | -0.153693000 |
| H | -1.432099000 | 1.252204000  | -1.494229000 |
| H | -0.866452000 | 4.031029000  | 0.322938000  |
| H | -2.627892000 | 2.302826000  | 0.750865000  |
| H | -0.815478000 | 3.425888000  | 2.933502000  |
| H | -1.058217000 | 1.310943000  | 2.322480000  |
| H | 1.180524000  | 2.136154000  | 0.434777000  |
| H | 0.942340000  | -0.362061000 | 2.218204000  |
| H | 2.133714000  | 1.010790000  | 2.384205000  |
| H | -5.541502000 | -3.424902000 | 0.596147000  |
| H | -7.016330000 | -2.884086000 | -0.139121000 |
| H | -1.070465000 | -1.480035000 | 0.934338000  |
| H | -6.159214000 | 1.126157000  | -1.979022000 |

#### 14B-TS- Ado

|   |             |              |              |
|---|-------------|--------------|--------------|
| O | 5.778929000 | -0.235484000 | -1.953253000 |
| H | 2.180775000 | 0.153131000  | 0.784325000  |
| C | 4.207003000 | -0.143575000 | -0.136461000 |
| N | 4.239551000 | 1.312560000  | -0.269936000 |
| C | 5.026806000 | -0.864376000 | -1.234262000 |
| H | 5.208890000 | 1.590269000  | -0.374044000 |
| H | 4.731680000 | -0.409537000 | 0.789845000  |
| H | 2.195869000 | -0.636410000 | -0.895000000 |
| C | 2.801263000 | -0.688646000 | 0.005329000  |

|   |              |              |              |
|---|--------------|--------------|--------------|
| C | 2.568905000  | -1.970546000 | 0.787074000  |
| O | 1.470484000  | -2.550397000 | 0.569998000  |
| O | 3.444159000  | -2.317646000 | 1.621265000  |
| C | 4.902086000  | -2.359503000 | -1.342314000 |
| H | 4.944201000  | -2.814454000 | -0.352282000 |
| H | 3.920729000  | -2.606667000 | -1.756420000 |
| H | 5.679732000  | -2.755253000 | -1.992601000 |
| C | 3.486425000  | 1.847271000  | -1.407747000 |
| H | 3.671356000  | 2.920097000  | -1.475128000 |
| H | 3.754844000  | 1.393429000  | -2.370529000 |
| H | 2.417896000  | 1.703223000  | -1.253442000 |
| N | -2.019243000 | 0.034099000  | -0.272825000 |
| N | -2.395943000 | -2.105117000 | 0.288803000  |
| N | -5.843222000 | -1.137808000 | -0.662870000 |
| N | -4.286428000 | 0.675673000  | -0.918578000 |
| N | -5.240955000 | -3.250544000 | 0.084186000  |
| C | -1.298796000 | 1.282398000  | -0.570742000 |
| C | -1.738879000 | 2.428565000  | 0.341159000  |
| C | -0.771008000 | 2.266935000  | 1.524454000  |
| C | 0.522965000  | 1.785999000  | 0.846927000  |
| C | 1.383690000  | 0.890620000  | 1.673727000  |
| C | -1.492659000 | -1.159584000 | 0.172835000  |
| C | -3.576600000 | -1.511496000 | -0.109272000 |
| C | -3.361523000 | -0.183215000 | -0.471149000 |
| C | -4.897295000 | -1.985016000 | -0.219756000 |
| C | -5.490970000 | 0.113321000  | -0.982205000 |
| O | -1.497190000 | 3.645632000  | -0.343674000 |
| O | -0.523401000 | 3.485150000  | 2.207705000  |
| O | 0.070932000  | 1.085187000  | -0.347066000 |
| H | -1.474014000 | 1.528636000  | -1.619019000 |
| H | -1.228981000 | 4.293757000  | 0.324681000  |
| H | -2.787687000 | 2.342271000  | 0.632030000  |
| H | -1.198197000 | 3.611153000  | 2.885411000  |
| H | -1.149109000 | 1.502699000  | 2.207355000  |
| H | 1.084268000  | 2.665835000  | 0.521974000  |
| H | 0.861065000  | 0.075037000  | 2.168033000  |
| H | 2.099146000  | 1.401002000  | 2.309914000  |
| H | -4.568460000 | -3.872110000 | 0.497962000  |
| H | -6.209452000 | -3.520720000 | 0.068509000  |
| H | -0.437065000 | -1.284595000 | 0.370031000  |
| H | -6.296065000 | 0.748047000  | -1.337529000 |

**15-TS- Ado**

|   |             |              |              |
|---|-------------|--------------|--------------|
| P | 3.020468000 | -3.183518000 | -1.626013000 |
| O | 3.016093000 | -4.746296000 | -1.497216000 |
| O | 4.301744000 | -2.737787000 | -2.422648000 |

|   |              |              |              |
|---|--------------|--------------|--------------|
| O | 2.810834000  | -2.547844000 | -0.314672000 |
| O | 1.871804000  | -2.892759000 | -2.693995000 |
| P | 1.151113000  | -1.582390000 | -3.295944000 |
| O | 2.305020000  | -0.672574000 | -3.856585000 |
| O | 0.080826000  | -1.970237000 | -4.205450000 |
| O | 0.775223000  | -0.729612000 | -2.017693000 |
| P | -0.221167000 | -0.993268000 | -0.750165000 |
| O | 0.779140000  | -1.114394000 | 0.443496000  |
| O | -1.169264000 | -2.079927000 | -0.992429000 |
| O | -0.914272000 | 0.395510000  | -0.554378000 |
| C | -0.192664000 | 1.624513000  | -0.277437000 |
| C | -1.190936000 | 2.757252000  | -0.249944000 |
| O | -1.681614000 | 2.995936000  | -1.598593000 |
| C | -2.430888000 | 2.539111000  | 0.599141000  |
| O | -2.821541000 | 3.711711000  | 1.239138000  |
| C | -3.467273000 | 1.998084000  | -0.371137000 |
| O | -4.769596000 | 2.333358000  | 0.043021000  |
| C | -3.042647000 | 2.668156000  | -1.701265000 |
| N | -3.239469000 | 1.779144000  | -2.845199000 |
| C | -2.318402000 | 1.342341000  | -3.775562000 |
| N | -2.848067000 | 0.557610000  | -4.677750000 |
| C | -4.181200000 | 0.466204000  | -4.329932000 |
| C | -5.259375000 | -0.254731000 | -4.925087000 |
| O | -5.267598000 | -0.973384000 | -5.916816000 |
| N | -6.458012000 | -0.052692000 | -4.196007000 |
| C | -6.606550000 | 0.707255000  | -3.067291000 |
| N | -7.822838000 | 0.735125000  | -2.485809000 |
| N | -5.604281000 | 1.371601000  | -2.525807000 |
| C | -4.436004000 | 1.218776000  | -3.191000000 |
| H | 0.534559000  | 1.797762000  | -1.070595000 |
| H | 0.313483000  | 1.542136000  | 0.681658000  |
| H | -0.668840000 | 3.656037000  | 0.080465000  |
| H | -2.239164000 | 1.615146000  | 1.522734000  |
| H | -3.788010000 | 3.690705000  | 1.322234000  |
| H | -3.340722000 | 0.917012000  | -0.469026000 |
| H | -5.365473000 | 2.065702000  | -0.686321000 |
| H | -3.642128000 | 3.568462000  | -1.865654000 |
| H | -1.286117000 | 1.639841000  | -3.715100000 |
| H | -8.638511000 | 0.400168000  | -2.969436000 |
| H | -7.972250000 | 1.405654000  | -1.750764000 |
| H | -7.259114000 | -0.546596000 | -4.566315000 |
| H | 1.579400000  | -1.687379000 | 0.247485000  |
| H | 2.491637000  | -0.805029000 | -4.797345000 |
| H | 5.097717000  | -2.613345000 | -1.885269000 |
| H | 3.261621000  | -5.242820000 | -2.291823000 |
| N | -0.245606000 | 3.449758000  | 4.828023000  |

|   |              |              |             |
|---|--------------|--------------|-------------|
| N | -1.834378000 | 4.979285000  | 5.245822000 |
| N | 0.439772000  | 5.712414000  | 8.077165000 |
| N | 1.268332000  | 3.939058000  | 6.681874000 |
| N | -1.552913000 | 6.832309000  | 7.681940000 |
| C | 0.505348000  | 2.394516000  | 4.130134000 |
| C | 0.641980000  | 1.130147000  | 4.979080000 |
| C | -0.632986000 | 0.361815000  | 4.593418000 |
| C | -0.807464000 | 0.712478000  | 3.107874000 |
| C | -2.215910000 | 0.750060000  | 2.611085000 |
| C | -1.439845000 | 4.018911000  | 4.445076000 |
| C | -0.844280000 | 5.058380000  | 6.204710000 |
| C | 0.157427000  | 4.121553000  | 5.957340000 |
| C | -0.667490000 | 5.881992000  | 7.332824000 |
| C | 1.324156000  | 4.775238000  | 7.715870000 |
| O | 1.798097000  | 0.438437000  | 4.540597000 |
| O | -0.496192000 | -1.042514000 | 4.732864000 |
| O | -0.196864000 | 2.031264000  | 2.970850000 |
| H | 1.483773000  | 2.795551000  | 3.862733000 |
| H | 1.607120000  | -0.507770000 | 4.623803000 |
| H | 0.697665000  | 1.355968000  | 6.045767000 |
| H | -0.722863000 | -1.294662000 | 5.635842000 |
| H | -1.477975000 | 0.735423000  | 5.176235000 |
| H | -0.209993000 | 0.011366000  | 2.521018000 |
| H | -2.925516000 | 1.249172000  | 3.267708000 |
| H | -2.585790000 | -0.190205000 | 2.214344000 |
| H | -2.417380000 | 6.931818000  | 7.179510000 |
| H | -1.416302000 | 7.355327000  | 8.529823000 |
| H | -1.953109000 | 3.691672000  | 3.555601000 |
| H | 2.198376000  | 4.689040000  | 8.352656000 |

### 16-TS- Ado

|   |              |              |              |
|---|--------------|--------------|--------------|
| C | 1.521221000  | 0.138612000  | -1.597341000 |
| C | 0.295144000  | -0.698593000 | -1.975293000 |
| C | -0.735808000 | -0.628158000 | -0.848431000 |
| C | -0.112175000 | -1.047522000 | 0.469059000  |
| C | 1.157998000  | -0.232988000 | 0.757424000  |
| O | 2.056261000  | -0.294593000 | -0.351967000 |
| N | -0.350862000 | -0.331641000 | -3.230073000 |
| O | -1.834883000 | -1.491722000 | -1.115554000 |
| O | -1.006909000 | -0.810692000 | 1.563249000  |
| C | 1.934795000  | -0.754033000 | 1.947204000  |
| O | 1.229914000  | -0.793421000 | 3.150108000  |
| O | 1.136810000  | 1.484011000  | -1.576697000 |
| C | 2.217336000  | 2.406470000  | -1.443053000 |
| H | 2.339276000  | -0.016898000 | -2.308694000 |
| H | 0.630795000  | -1.734787000 | -2.058113000 |

|   |              |              |              |
|---|--------------|--------------|--------------|
| H | -1.087540000 | 0.406269000  | -0.747824000 |
| H | 0.145429000  | -2.111714000 | 0.415329000  |
| H | 0.855209000  | 0.804934000  | 0.943744000  |
| H | 0.198215000  | -0.631991000 | -4.026391000 |
| H | -0.447008000 | 0.676807000  | -3.288592000 |
| H | -2.032068000 | -1.377025000 | -2.058177000 |
| H | -1.778313000 | -1.381074000 | 1.457957000  |
| H | 2.453920000  | -1.691687000 | 1.730253000  |
| H | 2.921537000  | 0.094532000  | 2.116885000  |
| H | 0.277371000  | -0.761146000 | 2.952093000  |
| H | 1.805789000  | 3.400082000  | -1.606902000 |
| H | 2.652119000  | 2.358369000  | -0.442256000 |
| H | 2.999009000  | 2.203161000  | -2.180924000 |
| N | 6.359226000  | -0.255025000 | -0.611792000 |
| N | 5.353049000  | 0.575211000  | -2.437896000 |
| N | 8.759303000  | 0.097669000  | -3.815002000 |
| N | 8.605484000  | -0.583950000 | -1.514955000 |
| N | 6.980090000  | 0.980731000  | -5.014513000 |
| C | 6.523252000  | -0.781626000 | 0.753496000  |
| C | 7.470730000  | 0.082187000  | 1.586098000  |
| C | 6.496854000  | 1.107528000  | 2.189424000  |
| C | 5.219777000  | 0.280458000  | 2.414065000  |
| C | 3.937599000  | 1.039369000  | 2.303928000  |
| C | 5.201845000  | 0.218354000  | -1.184895000 |
| C | 6.681380000  | 0.315415000  | -2.712359000 |
| C | 7.322723000  | -0.209067000 | -1.591045000 |
| C | 7.467720000  | 0.468284000  | -3.869717000 |
| C | 9.242095000  | -0.396534000 | -2.668801000 |
| O | 8.031019000  | -0.736577000 | 2.597544000  |
| O | 6.944621000  | 1.635124000  | 3.427236000  |
| O | 5.278160000  | -0.763798000 | 1.399549000  |
| H | 6.890062000  | -1.806006000 | 0.676959000  |
| H | 8.133749000  | -0.179272000 | 3.383413000  |
| H | 8.249929000  | 0.541825000  | 0.974456000  |
| H | 7.517013000  | 2.393177000  | 3.259230000  |
| H | 6.308544000  | 1.904936000  | 1.466758000  |
| H | 5.296264000  | -0.204772000 | 3.391066000  |
| H | 3.850675000  | 1.660395000  | 1.415638000  |
| H | 3.641526000  | 1.555144000  | 3.212945000  |
| H | 5.998732000  | 1.178420000  | -5.102801000 |
| H | 7.554118000  | 0.988238000  | -5.840255000 |
| H | 4.281661000  | 0.248919000  | -0.626613000 |
| H | 10.289151000 | -0.680203000 | -2.687800000 |

**17A-TS- Ado**

|   |             |             |             |
|---|-------------|-------------|-------------|
| O | 5.679185000 | 0.962559000 | 1.586749000 |
|---|-------------|-------------|-------------|

|   |              |              |              |
|---|--------------|--------------|--------------|
| O | 3.654736000  | -0.055147000 | 0.644876000  |
| H | 2.160154000  | -1.719280000 | -2.959237000 |
| O | 3.691066000  | 0.282155000  | 3.141320000  |
| C | 2.440908000  | -2.147964000 | -0.875289000 |
| O | 1.517097000  | 0.813017000  | -2.961674000 |
| H | -0.208402000 | -0.766673000 | -2.221760000 |
| H | 1.994096000  | -1.843604000 | 0.074778000  |
| C | 3.543282000  | 0.377094000  | -1.723879000 |
| H | 4.576094000  | 2.046383000  | -1.784921000 |
| H | 0.013887000  | -2.359690000 | -2.517539000 |
| C | 2.336333000  | -3.648142000 | -1.039184000 |
| H | 4.799027000  | -2.131466000 | 2.477666000  |
| O | 5.301151000  | -1.424051000 | 2.050255000  |
| H | 1.844641000  | 1.721829000  | -2.910624000 |
| C | 4.160055000  | -0.505152000 | -0.634682000 |
| H | 6.363335000  | 1.059751000  | 2.263236000  |
| P | 4.511103000  | -0.042491000 | 1.969061000  |
| O | 3.706794000  | 1.767367000  | -1.475713000 |
| O | 3.856153000  | -1.841750000 | -0.838073000 |
| H | 2.793402000  | -3.961726000 | -1.980020000 |
| C | 1.742503000  | -1.369739000 | -2.001688000 |
| H | 4.045706000  | 0.097442000  | -2.659207000 |
| H | 5.246752000  | -0.420863000 | -0.640299000 |
| H | 1.290513000  | -3.954099000 | -1.036753000 |
| C | 2.066191000  | 0.103062000  | -1.887884000 |
| N | 0.296594000  | -1.592399000 | -1.922005000 |
| H | 1.463061000  | 0.534444000  | -0.797365000 |
| H | 2.844521000  | -4.153401000 | -0.217599000 |
| N | -3.161108000 | 0.068479000  | -0.264056000 |
| N | -3.298901000 | -2.025118000 | 0.532828000  |
| N | -6.871773000 | -1.074664000 | 0.770252000  |
| N | -5.517158000 | 0.698676000  | -0.123168000 |
| N | -6.022366000 | -3.128773000 | 1.435825000  |
| C | -2.592146000 | 1.284567000  | -0.865768000 |
| C | -2.691871000 | 2.485756000  | 0.075606000  |
| C | -1.367164000 | 2.379877000  | 0.847439000  |
| C | -0.392915000 | 1.855478000  | -0.221622000 |
| C | 0.735927000  | 1.034552000  | 0.302746000  |
| C | -2.504142000 | -1.100674000 | 0.048978000  |
| C | -4.549903000 | -1.441123000 | 0.532160000  |
| C | -4.486750000 | -0.142015000 | 0.031384000  |
| C | -5.822550000 | -1.903006000 | 0.917150000  |
| C | -6.664029000 | 0.148741000  | 0.269043000  |
| O | -2.719754000 | 3.659323000  | -0.717973000 |
| O | -0.907846000 | 3.629365000  | 1.335090000  |
| O | -1.227039000 | 1.073430000  | -1.118803000 |

|   |              |              |              |
|---|--------------|--------------|--------------|
| H | -3.120638000 | 1.475433000  | -1.800710000 |
| H | -2.248778000 | 4.344484000  | -0.220644000 |
| H | -3.569422000 | 2.426561000  | 0.722487000  |
| H | -1.293719000 | 3.792433000  | 2.204029000  |
| H | -1.467993000 | 1.652822000  | 1.656717000  |
| H | -0.014021000 | 2.716775000  | -0.780720000 |
| H | 0.440866000  | 0.133671000  | 0.834827000  |
| H | 1.494856000  | 1.608969000  | 0.823516000  |
| H | -5.269352000 | -3.793604000 | 1.467223000  |
| H | -6.960116000 | -3.447569000 | 1.610181000  |
| H | -1.447890000 | -1.212087000 | -0.137764000 |
| H | -7.548862000 | 0.769012000  | 0.171368000  |

### 17B-TS- Ado

|   |              |              |              |
|---|--------------|--------------|--------------|
| O | 5.877639000  | -0.529321000 | 1.796468000  |
| O | 3.703310000  | 0.064449000  | 0.586628000  |
| H | 2.224543000  | -1.661184000 | -2.991265000 |
| O | 3.875725000  | 0.643562000  | 3.001618000  |
| C | 2.538295000  | -2.068505000 | -0.908447000 |
| O | 1.547419000  | 0.856763000  | -3.017176000 |
| H | -0.152001000 | -0.746354000 | -2.258179000 |
| H | 2.096660000  | -1.766059000 | 0.044494000  |
| C | 3.581520000  | 0.468848000  | -1.769067000 |
| H | 4.596648000  | 2.148782000  | -1.833074000 |
| H | 0.095540000  | -2.340575000 | -2.521078000 |
| C | 2.450106000  | -3.572221000 | -1.059672000 |
| H | 2.889492000  | -1.737989000 | 2.653993000  |
| O | 3.792389000  | -1.810865000 | 2.321500000  |
| H | 1.878009000  | 1.765231000  | -2.981992000 |
| C | 4.206992000  | -0.373667000 | -0.650395000 |
| P | 4.415788000  | -0.332069000 | 2.010610000  |
| O | 3.711675000  | 1.874585000  | -1.567719000 |
| O | 3.938417000  | -1.736029000 | -0.900428000 |
| H | 2.902779000  | -3.888567000 | -2.002187000 |
| C | 1.809887000  | -1.312232000 | -2.031670000 |
| H | 4.090959000  | 0.177904000  | -2.697731000 |
| H | 5.294797000  | -0.284800000 | -0.660366000 |
| H | 1.409013000  | -3.894882000 | -1.044733000 |
| C | 2.110346000  | 0.166313000  | -1.934065000 |
| N | 0.366687000  | -1.557138000 | -1.941165000 |
| H | 1.497365000  | 0.596955000  | -0.852428000 |
| H | 2.974057000  | -4.063171000 | -0.239151000 |
| N | -3.104722000 | 0.048652000  | -0.254179000 |
| N | -3.170504000 | -2.037486000 | 0.571150000  |
| N | -6.754236000 | -1.163103000 | 0.913024000  |
| N | -5.469295000 | 0.628115000  | -0.045413000 |



|   |              |              |              |
|---|--------------|--------------|--------------|
| N | -5.837247000 | -3.188975000 | 1.575914000  |
| C | -2.579677000 | 1.268639000  | -0.889327000 |
| C | -2.693478000 | 2.482195000  | 0.034086000  |
| C | -1.357273000 | 2.415410000  | 0.789765000  |
| C | -0.384122000 | 1.892608000  | -0.281380000 |
| C | 0.761047000  | 1.094806000  | 0.242130000  |
| C | -2.412225000 | -1.102011000 | 0.050815000  |
| C | -4.433459000 | -1.480958000 | 0.604071000  |
| C | -4.415315000 | -0.187129000 | 0.086010000  |
| C | -5.682247000 | -1.965809000 | 1.035846000  |
| C | -6.590216000 | 0.058019000  | 0.390315000  |
| O | -2.756001000 | 3.642509000  | -0.777237000 |
| O | -0.917606000 | 3.682345000  | 1.251101000  |
| O | -1.215424000 | 1.090177000  | -1.165510000 |
| H | -3.130686000 | 1.428288000  | -1.817130000 |
| H | -2.286953000 | 4.342693000  | -0.299319000 |
| H | -3.561589000 | 2.415540000  | 0.692747000  |
| H | -1.296866000 | 3.852021000  | 2.121629000  |
| H | -1.433569000 | 1.700807000  | 1.612645000  |
| H | -0.022707000 | 2.752765000  | -0.853654000 |
| H | 0.485297000  | 0.194288000  | 0.784962000  |
| H | 1.516502000  | 1.683696000  | 0.750426000  |
| H | -5.068553000 | -3.836190000 | 1.590901000  |
| H | -6.761295000 | -3.526489000 | 1.784718000  |
| H | -1.360078000 | -1.192909000 | -0.169142000 |
| H | -7.491511000 | 0.657209000  | 0.313639000  |

### 17C-TS- Ado

|   |              |              |              |
|---|--------------|--------------|--------------|
| O | 6.096163000  | -0.330148000 | 1.560692000  |
| O | 3.737970000  | -0.054143000 | 0.593109000  |
| H | 2.192105000  | -1.623053000 | -3.042328000 |
| O | 4.226253000  | 0.837516000  | 2.881512000  |
| C | 2.515469000  | -2.098597000 | -0.976140000 |
| O | 1.555270000  | 0.901651000  | -2.991958000 |
| H | -0.168539000 | -0.704770000 | -2.286162000 |
| H | 2.089382000  | -1.809285000 | -0.011365000 |
| C | 3.581083000  | 0.446834000  | -1.748510000 |
| H | 4.636836000  | 2.101926000  | -1.696590000 |
| H | 0.058015000  | -2.297318000 | -2.575498000 |
| C | 2.390185000  | -3.596860000 | -1.164156000 |
| O | 4.158707000  | -1.693002000 | 2.535569000  |
| H | 1.913858000  | 1.798289000  | -2.936193000 |
| C | 4.202792000  | -0.426396000 | -0.646448000 |
| P | 4.643927000  | -0.344684000 | 2.019915000  |
| O | 3.722919000  | 1.850969000  | -1.522238000 |
| O | 3.914380000  | -1.791402000 | -0.981713000 |

|   |              |              |              |
|---|--------------|--------------|--------------|
| H | 2.823653000  | -3.899920000 | -2.120411000 |
| C | 1.786245000  | -1.300012000 | -2.069463000 |
| H | 4.085534000  | 0.176401000  | -2.687260000 |
| H | 5.293619000  | -0.362525000 | -0.684619000 |
| H | 1.343242000  | -3.900600000 | -1.142241000 |
| C | 2.107836000  | 0.169987000  | -1.926882000 |
| N | 0.339061000  | -1.527460000 | -1.982110000 |
| H | 1.496305000  | 0.580415000  | -0.839463000 |
| H | 2.916315000  | -4.119034000 | -0.364034000 |
| N | -3.105616000 | 0.064625000  | -0.258021000 |
| N | -3.173459000 | -2.032745000 | 0.538370000  |
| N | -6.750593000 | -1.149525000 | 0.922086000  |
| N | -5.466671000 | 0.649919000  | -0.022391000 |
| N | -5.835348000 | -3.187267000 | 1.550600000  |
| C | -2.578829000 | 1.290009000  | -0.882822000 |
| C | -2.687048000 | 2.494396000  | 0.052876000  |
| C | -1.351736000 | 2.412456000  | 0.808561000  |
| C | -0.379154000 | 1.891503000  | -0.264495000 |
| C | 0.754025000  | 1.073469000  | 0.254546000  |
| C | -2.415529000 | -1.093234000 | 0.024577000  |
| C | -4.433598000 | -1.471460000 | 0.589840000  |
| C | -4.414398000 | -0.170592000 | 0.089510000  |
| C | -5.680504000 | -1.957479000 | 1.025398000  |
| C | -6.586156000 | 0.077926000  | 0.414422000  |
| O | -2.742936000 | 3.663496000  | -0.746535000 |
| O | -0.904738000 | 3.673296000  | 1.280627000  |
| O | -1.216528000 | 1.111702000  | -1.164549000 |
| H | -3.131802000 | 1.459824000  | -1.807677000 |
| H | -2.264709000 | 4.354048000  | -0.263677000 |
| H | -3.556017000 | 2.425951000  | 0.710189000  |
| H | -1.284595000 | 3.838520000  | 2.151754000  |
| H | -1.433782000 | 1.692387000  | 1.626056000  |
| H | -0.004808000 | 2.754240000  | -0.824376000 |
| H | 0.464320000  | 0.169639000  | 0.784224000  |
| H | 1.512665000  | 1.646800000  | 0.775702000  |
| H | -5.068790000 | -3.837202000 | 1.550170000  |
| H | -6.758891000 | -3.524742000 | 1.761639000  |
| H | -1.365867000 | -1.185843000 | -0.207145000 |
| H | -7.485891000 | 0.681200000  | 0.352752000  |

### 18-TS- Ado

|   |              |              |              |
|---|--------------|--------------|--------------|
| H | 1.500273000  | -0.444554000 | -2.396116000 |
| C | -4.759271000 | -0.810384000 | 0.701043000  |
| C | -1.992814000 | -0.335815000 | -1.423803000 |
| C | 1.807103000  | -0.139688000 | -1.388063000 |
| C | -0.784838000 | 1.735639000  | -0.520767000 |

|   |              |              |              |
|---|--------------|--------------|--------------|
| N | -1.861779000 | 0.725257000  | -0.563293000 |
| N | -3.039717000 | -1.086243000 | -1.169460000 |
| O | 1.839421000  | 3.199617000  | 0.354693000  |
| N | -3.188236000 | 1.435117000  | 1.359032000  |
| C | -2.910510000 | 0.641185000  | 0.316038000  |
| C | 1.429061000  | 1.327621000  | -1.202212000 |
| C | -3.629731000 | -0.487707000 | -0.074662000 |
| O | 5.288499000  | -1.323547000 | -0.353120000 |
| O | 3.200815000  | -0.293793000 | -1.244757000 |
| O | 3.058829000  | -2.576776000 | -0.087081000 |
| C | -4.273308000 | 1.027948000  | 2.014059000  |
| H | 1.258689000  | -0.766369000 | -0.679841000 |
| H | -5.287970000 | -2.517881000 | -0.291157000 |
| H | -0.221806000 | 2.224885000  | 1.570124000  |
| N | -5.057025000 | -0.024790000 | 1.751157000  |
| H | 2.208988000  | 1.190032000  | 0.814875000  |
| C | 0.079833000  | 1.628276000  | 0.717746000  |
| O | 0.058157000  | 1.551892000  | -1.629996000 |
| H | 2.065798000  | 1.943326000  | -1.839677000 |
| O | 3.517934000  | -0.481780000 | 1.298281000  |
| H | -1.280145000 | 2.709378000  | -0.591082000 |
| H | -0.056273000 | 0.381213000  | 1.200841000  |
| C | 1.498995000  | 1.800751000  | 0.250849000  |
| H | -4.552990000 | 1.613022000  | 2.883262000  |
| H | -1.282209000 | -0.493373000 | -2.216654000 |
| N | -5.551036000 | -1.863188000 | 0.424609000  |
| H | -6.284501000 | -2.113586000 | 1.065635000  |
| P | 3.815779000  | -1.257876000 | 0.015533000  |
| H | 2.788804000  | 3.282495000  | 0.202831000  |
| N | -0.908108000 | 0.506144000  | 5.546107000  |
| N | -3.088001000 | 1.038567000  | 5.477678000  |
| N | -2.689211000 | 0.682885000  | 9.143484000  |
| N | -0.634296000 | 0.280304000  | 7.962569000  |
| N | -4.691958000 | 1.205032000  | 8.094422000  |
| C | 0.472859000  | 0.263199000  | 5.092102000  |
| C | 0.908532000  | -1.181526000 | 5.342485000  |
| C | 0.465374000  | -1.867299000 | 4.038686000  |
| C | 0.700505000  | -0.776902000 | 2.983539000  |
| C | -0.243255000 | -0.802651000 | 1.827056000  |
| C | -1.999529000 | 0.834253000  | 4.775478000  |
| C | -2.694440000 | 0.843723000  | 6.786566000  |
| C | -1.340304000 | 0.518999000  | 6.850437000  |
| C | -3.379501000 | 0.919496000  | 8.013894000  |
| C | -1.387189000 | 0.385427000  | 9.055013000  |
| O | 2.319975000  | -1.198761000 | 5.463904000  |
| O | 1.248300000  | -3.008006000 | 3.722251000  |

|   |              |              |              |
|---|--------------|--------------|--------------|
| O | 0.545960000  | 0.480049000  | 3.710654000  |
| H | 1.122542000  | 0.964062000  | 5.618160000  |
| H | 2.626666000  | -2.009792000 | 5.030902000  |
| H | 0.433502000  | -1.603852000 | 6.230555000  |
| H | 0.876432000  | -3.779121000 | 4.166759000  |
| H | -0.594623000 | -2.125603000 | 4.101635000  |
| H | 1.731038000  | -0.831360000 | 2.622500000  |
| H | -1.298919000 | -0.782840000 | 2.086801000  |
| H | -0.007086000 | -1.554959000 | 1.080529000  |
| H | -5.204767000 | 1.466949000  | 7.270823000  |
| H | -5.119821000 | 1.331012000  | 8.995735000  |
| H | -1.922085000 | 0.920042000  | 3.705136000  |
| H | -0.884503000 | 0.208066000  | 10.000040000 |

### 19-TS- Ado

|   |               |              |              |
|---|---------------|--------------|--------------|
| H | 1.357294000   | -1.465295000 | -1.804090000 |
| C | -0.356295000  | -2.163091000 | 0.992548000  |
| H | -1.344300000  | -1.754690000 | 0.772071000  |
| H | -0.475578000  | -3.142875000 | 1.447097000  |
| H | 0.155534000   | -1.498397000 | 1.683824000  |
| C | 0.415926000   | -2.330515000 | -0.292169000 |
| H | -0.233279000  | 1.885539000  | -0.010395000 |
| H | 1.219954000   | 0.687528000  | -1.493117000 |
| H | 3.254393000   | 1.718017000  | 1.310763000  |
| H | -0.663492000  | 0.441643000  | 0.889845000  |
| O | 0.620506000   | -3.445661000 | -0.768789000 |
| C | 2.037755000   | 0.391922000  | 0.479700000  |
| C | 0.931617000   | 0.169210000  | -0.579372000 |
| N | 0.838404000   | -1.226818000 | -0.971794000 |
| S | -1.743849000  | 0.504444000  | -1.261284000 |
| C | -0.375535000  | 0.809265000  | -0.092205000 |
| O | 2.388436000   | -0.521642000 | 1.220180000  |
| N | 2.584164000   | 1.621137000  | 0.561073000  |
| C | -2.991950000  | 1.469078000  | -0.457924000 |
| H | -3.264078000  | 0.938460000  | 0.711912000  |
| H | -2.697427000  | 2.494236000  | -0.237258000 |
| H | -3.927529000  | 1.410939000  | -1.007885000 |
| C | 2.298557000   | 2.819257000  | -0.215448000 |
| H | 1.531902000   | 3.437038000  | 0.257216000  |
| H | 3.211884000   | 3.405563000  | -0.296788000 |
| H | 1.975790000   | 2.568409000  | -1.222970000 |
| N | -7.517138000  | -1.023835000 | 1.335166000  |
| N | -7.330430000  | -3.140554000 | 0.613039000  |
| N | -10.985776000 | -3.042887000 | 1.211666000  |
| N | -9.923220000  | -0.950044000 | 1.730634000  |
| N | -9.845899000  | -4.900880000 | 0.418947000  |

|   |               |              |             |
|---|---------------|--------------|-------------|
| C | -7.154466000  | 0.337629000  | 1.737184000 |
| C | -7.093903000  | 0.497681000  | 3.260646000 |
| C | -5.600415000  | 0.259214000  | 3.541511000 |
| C | -4.936221000  | 0.891782000  | 2.309404000 |
| C | -3.591601000  | 0.362797000  | 1.945672000 |
| C | -6.693390000  | -2.026959000 | 0.880182000 |
| C | -8.649957000  | -2.860884000 | 0.908925000 |
| C | -8.786212000  | -1.548996000 | 1.357942000 |
| C | -9.830784000  | -3.625006000 | 0.842231000 |
| C | -10.966710000 | -1.769625000 | 1.622997000 |
| O | -7.456559000  | 1.829843000  | 3.577250000 |
| O | -5.145588000  | 0.908377000  | 4.715376000 |
| O | -5.871766000  | 0.631544000  | 1.233463000 |
| H | -7.900598000  | 1.011138000  | 1.313291000 |
| H | -6.938658000  | 2.084529000  | 4.355560000 |
| H | -7.744628000  | -0.219215000 | 3.767513000 |
| H | -5.282195000  | 0.327550000  | 5.473250000 |
| H | -5.393388000  | -0.813418000 | 3.574312000 |
| H | -4.887817000  | 1.973283000  | 2.476633000 |
| H | -3.558680000  | -0.702400000 | 1.726077000 |
| H | -2.794041000  | 0.690723000  | 2.606546000 |
| H | -8.989056000  | -5.372390000 | 0.188670000 |
| H | -10.704420000 | -5.424009000 | 0.436393000 |
| H | -5.637307000  | -1.862161000 | 0.753979000 |
| H | -11.929307000 | -1.356775000 | 1.906001000 |

### 20-TS- Ado

|   |              |              |              |
|---|--------------|--------------|--------------|
| N | -0.626301000 | 0.670870000  | -0.816904000 |
| H | -4.640607000 | 2.270879000  | -0.861176000 |
| H | 4.008531000  | -2.361003000 | -0.721018000 |
| O | -2.839654000 | -2.288618000 | -0.978579000 |
| H | -4.396090000 | -1.964504000 | 0.481821000  |
| C | -2.192697000 | -1.202220000 | -0.332604000 |
| C | 4.715410000  | -0.002046000 | -0.207863000 |
| H | 5.015556000  | -0.635032000 | 0.914367000  |
| C | -3.835468000 | 0.507386000  | -0.736579000 |
| N | 3.298038000  | 0.123921000  | -0.339893000 |
| H | -1.695735000 | 2.438012000  | -0.241913000 |
| O | 3.425542000  | 2.205582000  | 0.660126000  |
| N | 0.397982000  | 2.409569000  | 0.155292000  |
| O | -4.256185000 | -1.176286000 | 1.027056000  |
| H | -1.402705000 | -1.542590000 | 0.336706000  |
| C | 2.543398000  | -0.912002000 | -0.870148000 |
| H | -2.197739000 | -2.983015000 | -1.163817000 |
| H | -2.827451000 | 0.251263000  | 1.132289000  |
| C | 1.317244000  | 1.410414000  | -0.111373000 |

|   |              |              |              |
|---|--------------|--------------|--------------|
| C | 0.694940000  | 0.326998000  | -0.710909000 |
| C | -1.681037000 | -0.185845000 | -1.364827000 |
| C | 2.715806000  | 1.356218000  | 0.134143000  |
| N | 3.193285000  | -2.046625000 | -1.236589000 |
| H | -1.274333000 | -0.684659000 | -2.243617000 |
| C | -0.742252000 | 1.937188000  | -0.274408000 |
| O | -4.124023000 | 1.770656000  | -0.217218000 |
| H | -4.714625000 | 0.069641000  | -1.214907000 |
| O | -2.797732000 | 0.587198000  | -1.732655000 |
| H | 5.165733000  | -0.591262000 | -0.998558000 |
| H | 2.573383000  | -2.788062000 | -1.523799000 |
| C | -3.282589000 | -0.394530000 | 0.379860000  |
| N | 1.245275000  | -0.839577000 | -1.080565000 |
| H | 5.176573000  | 0.966516000  | -0.068983000 |
| N | 6.416816000  | -5.121124000 | 0.085991000  |
| N | 8.622573000  | -5.382750000 | -0.238290000 |
| N | 7.372385000  | -7.608448000 | -2.924096000 |
| N | 5.585308000  | -6.586065000 | -1.683915000 |
| N | 9.617793000  | -7.246140000 | -2.469896000 |
| C | 5.170162000  | -4.647953000 | 0.646049000  |
| C | 4.913499000  | -5.062226000 | 2.106841000  |
| C | 5.185214000  | -3.762037000 | 2.890466000  |
| C | 4.748124000  | -2.684452000 | 1.890788000  |
| C | 5.345291000  | -1.330857000 | 2.065872000  |
| C | 7.698370000  | -4.793305000 | 0.473614000  |
| C | 7.920302000  | -6.146514000 | -1.151727000 |
| C | 6.548267000  | -5.996061000 | -0.969901000 |
| C | 8.325735000  | -7.005633000 | -2.191192000 |
| C | 6.088215000  | -7.368907000 | -2.636207000 |
| O | 3.550952000  | -5.432545000 | 2.220186000  |
| O | 4.415426000  | -3.662865000 | 4.073750000  |
| O | 5.174970000  | -3.220644000 | 0.616644000  |
| H | 4.377598000  | -5.045839000 | 0.012318000  |
| H | 3.262953000  | -5.170721000 | 3.108093000  |
| H | 5.568666000  | -5.882917000 | 2.409391000  |
| H | 4.907438000  | -4.047563000 | 4.808648000  |
| H | 6.252067000  | -3.662472000 | 3.102300000  |
| H | 3.653438000  | -2.631359000 | 1.912389000  |
| H | 6.432631000  | -1.308107000 | 2.056063000  |
| H | 4.899525000  | -0.740088000 | 2.860130000  |
| H | 10.346779000 | -6.780917000 | -1.958387000 |
| H | 9.862156000  | -7.841695000 | -3.242282000 |
| H | 7.881127000  | -4.100650000 | 1.278990000  |
| H | 5.366109000  | -7.881930000 | -3.262585000 |

**21A-TS- Ado**

|   |              |              |              |
|---|--------------|--------------|--------------|
| N | -0.028133000 | 0.046185000  | 0.251915000  |
| N | -1.180892000 | 1.909925000  | -0.233570000 |
| N | -3.987797000 | -0.506258000 | -0.154633000 |
| N | -1.875867000 | -1.551354000 | 0.320542000  |
| N | -4.223054000 | 1.750825000  | -0.638808000 |
| C | 1.103494000  | -0.821887000 | 0.618007000  |
| C | 1.357985000  | -1.900917000 | -0.434890000 |
| C | 2.328191000  | -1.178860000 | -1.383702000 |
| C | 3.157575000  | -0.303686000 | -0.428870000 |
| C | 3.649691000  | 0.983598000  | -1.006778000 |
| C | 0.001942000  | 1.403413000  | 0.021015000  |
| C | -2.041706000 | 0.833456000  | -0.156857000 |
| C | -1.345428000 | -0.333357000 | 0.153669000  |
| C | -3.434522000 | 0.708568000  | -0.317302000 |
| C | -3.195684000 | -1.541337000 | 0.149376000  |
| O | 1.997635000  | -2.990774000 | 0.206165000  |
| O | 3.186459000  | -2.067523000 | -2.080014000 |
| O | 2.267939000  | -0.044071000 | 0.695374000  |
| H | 0.886984000  | -1.265844000 | 1.590586000  |
| H | 2.621472000  | -3.364564000 | -0.433986000 |
| H | 0.437100000  | -2.219029000 | -0.927492000 |
| H | 2.746141000  | -2.366609000 | -2.884544000 |
| H | 1.764077000  | -0.551898000 | -2.078213000 |
| H | 3.992805000  | -0.902291000 | -0.055647000 |
| H | 2.905599000  | 1.558628000  | -1.553925000 |
| H | 4.603169000  | 0.915390000  | -1.522184000 |
| H | -3.842951000 | 2.680478000  | -0.674048000 |
| H | -5.221660000 | 1.632604000  | -0.653290000 |
| H | 0.924627000  | 1.957784000  | 0.079869000  |
| H | -3.700079000 | -2.494173000 | 0.271494000  |
| H | 3.891008000  | 1.834557000  | 0.068687000  |
| C | 5.083992000  | 3.657299000  | 0.625277000  |
| P | 5.171798000  | 5.131319000  | 1.658820000  |
| O | 2.662536000  | 3.343116000  | 0.956252000  |
| O | 6.339137000  | 6.069154000  | 1.099919000  |
| H | 6.029531000  | 3.116411000  | 0.682115000  |
| H | 2.747004000  | 4.288735000  | 1.178903000  |
| O | 3.858258000  | 5.810770000  | 1.778545000  |
| H | 4.960464000  | 4.014926000  | -0.401242000 |
| O | 5.802040000  | 4.574183000  | 3.008609000  |
| H | 4.090929000  | 2.175070000  | 1.916363000  |
| C | 3.929074000  | 2.751436000  | 1.002444000  |
| H | 5.778686000  | 5.195563000  | 3.750473000  |
| H | 6.028245000  | 6.731931000  | 0.467386000  |

**21B-TS- Ado**

|   |              |              |              |
|---|--------------|--------------|--------------|
| N | 0.001887000  | 0.038032000  | 0.277766000  |
| N | -1.101304000 | 1.941757000  | -0.165494000 |
| N | -3.970318000 | -0.401444000 | -0.147390000 |
| N | -1.887306000 | -1.512285000 | 0.305994000  |
| N | -4.145166000 | 1.871844000  | -0.580349000 |
| C | 1.112429000  | -0.865726000 | 0.626193000  |
| C | 1.337712000  | -1.928850000 | -0.449208000 |
| C | 2.315873000  | -1.206695000 | -1.388755000 |
| C | 3.170179000  | -0.364143000 | -0.426132000 |
| C | 3.679126000  | 0.926699000  | -0.978647000 |
| C | 0.067969000  | 1.399208000  | 0.079524000  |
| C | -1.989702000 | 0.886388000  | -0.116073000 |
| C | -1.324328000 | -0.305098000 | 0.168168000  |
| C | -3.384806000 | 0.801733000  | -0.280981000 |
| C | -3.205995000 | -1.463744000 | 0.133420000  |
| O | 1.959103000  | -3.044750000 | 0.165368000  |
| O | 3.152913000  | -2.098769000 | -2.108082000 |
| O | 2.295224000  | -0.120935000 | 0.718006000  |
| H | 0.884205000  | -1.323295000 | 1.589854000  |
| H | 2.579212000  | -3.410295000 | -0.483155000 |
| H | 0.407362000  | -2.219019000 | -0.941292000 |
| H | 2.698547000  | -2.379878000 | -2.911243000 |
| H | 1.759846000  | -0.556373000 | -2.068207000 |
| H | 3.998424000  | -0.984963000 | -0.074171000 |
| H | 2.948260000  | 1.512294000  | -1.532678000 |
| H | 4.641259000  | 0.859526000  | -1.477769000 |
| H | -3.741295000 | 2.792161000  | -0.584432000 |
| H | -5.146788000 | 1.781494000  | -0.589757000 |
| H | 1.004277000  | 1.929343000  | 0.155615000  |
| H | -3.735414000 | -2.405606000 | 0.232822000  |
| H | 3.913182000  | 1.787349000  | 0.122735000  |
| C | 5.091743000  | 3.628048000  | 0.661805000  |
| P | 5.110679000  | 5.159417000  | 1.678044000  |
| O | 2.692715000  | 3.285942000  | 1.047119000  |
| O | 6.154253000  | 6.137453000  | 0.876833000  |
| H | 6.048881000  | 3.111547000  | 0.750565000  |
| H | 2.825716000  | 4.257764000  | 1.171414000  |
| O | 3.717511000  | 5.741515000  | 1.559075000  |
| H | 4.970169000  | 3.935475000  | -0.381973000 |
| O | 5.710906000  | 4.905992000  | 3.022250000  |
| H | 4.147046000  | 2.115402000  | 1.953612000  |
| C | 3.962403000  | 2.698215000  | 1.045640000  |
| H | 5.722540000  | 6.562605000  | 0.125302000  |

**21C-TS- Ado**

|   |             |              |              |
|---|-------------|--------------|--------------|
| N | 0.295867000 | -0.252363000 | -0.297497000 |
|---|-------------|--------------|--------------|



|   |              |              |              |
|---|--------------|--------------|--------------|
| N | -0.869561000 | 1.567126000  | -0.919431000 |
| N | -2.071479000 | 1.278984000  | 2.570572000  |
| N | -0.511413000 | -0.457980000 | 1.998621000  |
| N | -2.749402000 | 2.934144000  | 1.089556000  |
| C | 1.294625000  | -1.315621000 | -0.273529000 |
| C | 1.698886000  | -1.816118000 | -1.662258000 |
| C | 2.976779000  | -1.002915000 | -1.942865000 |
| C | 3.604758000  | -0.883988000 | -0.553324000 |
| C | 4.480669000  | 0.307514000  | -0.347477000 |
| C | 0.010206000  | 0.671220000  | -1.281882000 |
| C | -1.176537000 | 1.239873000  | 0.387056000  |
| C | -0.463741000 | 0.114446000  | 0.791927000  |
| C | -2.007985000 | 1.839334000  | 1.350798000  |
| C | -1.340972000 | 0.185104000  | 2.817241000  |
| O | 2.006762000  | -3.195938000 | -1.548637000 |
| O | 3.870611000  | -1.671287000 | -2.819123000 |
| O | 2.478558000  | -0.851687000 | 0.356537000  |
| H | 0.867088000  | -2.124070000 | 0.318193000  |
| H | 2.733082000  | -3.368627000 | -2.166865000 |
| H | 0.917197000  | -1.662370000 | -2.409729000 |
| H | 3.642009000  | -1.455783000 | -3.731137000 |
| H | 2.723653000  | -0.012035000 | -2.327164000 |
| H | 4.156096000  | -1.817516000 | -0.365854000 |
| H | 5.202220000  | 0.459574000  | -1.146981000 |
| H | 4.927911000  | 0.376770000  | 0.641433000  |
| H | -2.573711000 | 3.458249000  | 0.249177000  |
| H | -3.194598000 | 3.409914000  | 1.856700000  |
| H | 0.472500000  | 0.628761000  | -2.253987000 |
| H | -1.435932000 | -0.223124000 | 3.817911000  |
| H | 3.652105000  | 1.515307000  | -0.381046000 |
| C | 2.305365000  | 2.674172000  | 1.003827000  |
| P | 1.742071000  | 4.381040000  | 1.510422000  |
| O | 4.061321000  | 3.617093000  | -0.412438000 |
| O | 1.216594000  | 4.249771000  | 2.936813000  |
| H | 1.454240000  | 1.995905000  | 0.955757000  |
| H | 3.835388000  | 4.316185000  | 0.285236000  |
| O | 3.068562000  | 5.185156000  | 1.414926000  |
| H | 2.961495000  | 2.315383000  | 1.804661000  |
| O | 0.700848000  | 4.838428000  | 0.490848000  |
| H | 2.402395000  | 2.644692000  | -1.187540000 |
| C | 3.056354000  | 2.650675000  | -0.305500000 |

**22A-TS- Ado**

|   |              |              |              |
|---|--------------|--------------|--------------|
| N | -0.544463000 | -0.263948000 | -0.470759000 |
| N | -1.826403000 | 0.891170000  | -1.907548000 |
| N | -3.716508000 | 1.542629000  | 1.213639000  |

|   |              |              |              |
|---|--------------|--------------|--------------|
| N | -1.776799000 | 0.175267000  | 1.591403000  |
| N | -4.332434000 | 2.343879000  | -0.873490000 |
| C | 0.571879000  | -0.996698000 | 0.068299000  |
| C | 1.073272000  | -2.173334000 | -0.786719000 |
| C | 2.407507000  | -1.650714000 | -1.361507000 |
| C | 2.907046000  | -0.722435000 | -0.246568000 |
| C | 3.868341000  | 0.341841000  | -0.635688000 |
| C | -0.757271000 | 0.154653000  | -1.769012000 |
| C | -2.352236000 | 0.983587000  | -0.631373000 |
| C | -1.567123000 | 0.281515000  | 0.276965000  |
| C | -3.484431000 | 1.637810000  | -0.108140000 |
| C | -2.870107000 | 0.835221000  | 1.969517000  |
| O | 1.302508000  | -3.269624000 | 0.080042000  |
| O | 3.345736000  | -2.684317000 | -1.588415000 |
| O | 1.682218000  | -0.096799000 | 0.211738000  |
| H | 0.263225000  | -1.360592000 | 1.047494000  |
| H | 2.052199000  | -3.762875000 | -0.287089000 |
| H | 0.356454000  | -2.441601000 | -1.566520000 |
| H | 3.254332000  | -3.007691000 | -2.492437000 |
| H | 2.227194000  | -1.069580000 | -2.268715000 |
| H | 3.317847000  | -1.346057000 | 0.555293000  |
| H | 3.541721000  | 0.984046000  | -1.449905000 |
| H | 4.903515000  | 0.024643000  | -0.705643000 |
| H | -4.166225000 | 2.450502000  | -1.858619000 |
| H | -5.113764000 | 2.816399000  | -0.452435000 |
| H | -0.086498000 | -0.119614000 | -2.567446000 |
| H | -3.108104000 | 0.797632000  | 3.027240000  |
| H | 3.939732000  | 1.289107000  | 0.452904000  |
| H | 2.062642000  | 0.538980000  | 3.353349000  |
| H | 1.684248000  | 2.062140000  | 2.843128000  |
| C | 3.667907000  | 1.711781000  | 2.681705000  |
| N | 2.246789000  | 1.223306000  | 2.621908000  |
| C | 4.085743000  | 2.241808000  | 1.323542000  |
| C | 3.680932000  | 2.870294000  | 3.743799000  |
| O | 2.577754000  | 3.456951000  | 3.880132000  |
| H | 3.376943000  | 2.990352000  | 0.967072000  |
| H | 4.297695000  | 0.891435000  | 3.013396000  |
| O | 4.766350000  | 3.096644000  | 4.298877000  |
| C | 5.488516000  | 2.680101000  | 1.166770000  |
| C | 5.786212000  | 3.902380000  | 0.557010000  |
| C | 6.563428000  | 1.865138000  | 1.549864000  |
| C | 7.097712000  | 4.312304000  | 0.352907000  |
| H | 4.977709000  | 4.551054000  | 0.242199000  |
| C | 7.875153000  | 2.260094000  | 1.351904000  |
| H | 6.374463000  | 0.902041000  | 2.006628000  |
| C | 8.148861000  | 3.490948000  | 0.753908000  |

|   |             |             |              |
|---|-------------|-------------|--------------|
| H | 7.304282000 | 5.268263000 | -0.114014000 |
| H | 8.698638000 | 1.625094000 | 1.651964000  |
| O | 9.460448000 | 3.831713000 | 0.586126000  |
| H | 9.528077000 | 4.696950000 | 0.163116000  |
| H | 1.976161000 | 0.800873000 | 1.714452000  |

### 22B-TS- Ado

|   |              |              |              |
|---|--------------|--------------|--------------|
| H | -3.624406000 | -1.945190000 | -0.936486000 |
| H | -3.659259000 | -0.861636000 | 0.259958000  |
| C | -1.871067000 | -0.928578000 | -0.681801000 |
| N | -3.344427000 | -0.998729000 | -0.697313000 |
| C | -1.470695000 | 0.542023000  | -0.588573000 |
| C | -1.238859000 | -1.823913000 | 0.421670000  |
| O | -1.731681000 | -1.723799000 | 1.574335000  |
| H | -2.086345000 | 0.987492000  | 0.465581000  |
| H | -1.513588000 | -1.309233000 | -1.644247000 |
| H | -1.970798000 | 1.100174000  | -1.381007000 |
| O | -0.292460000 | -2.571454000 | 0.072758000  |
| C | -0.056959000 | 0.952581000  | -0.444298000 |
| C | 0.745229000  | 0.532778000  | 0.627173000  |
| C | 0.507616000  | 1.867777000  | -1.344605000 |
| C | 2.046429000  | 0.989622000  | 0.782860000  |
| H | 0.337554000  | -0.146444000 | 1.362895000  |
| C | 1.807772000  | 2.330928000  | -1.203007000 |
| H | -0.088363000 | 2.226231000  | -2.175756000 |
| C | 2.585049000  | 1.890649000  | -0.134690000 |
| H | 2.643666000  | 0.654117000  | 1.623398000  |
| H | 2.228670000  | 3.034525000  | -1.909973000 |
| O | 3.860068000  | 2.378195000  | -0.031951000 |
| H | 4.293167000  | 2.007318000  | 0.746891000  |
| N | -3.029174000 | 5.673454000  | 1.137146000  |
| N | -5.142252000 | 6.057147000  | 0.485411000  |
| N | -4.054472000 | 9.554739000  | 1.044130000  |
| N | -2.305119000 | 7.973217000  | 1.510227000  |
| N | -6.181620000 | 8.948986000  | 0.344697000  |
| C | -1.803922000 | 4.956765000  | 1.502283000  |
| C | -1.638280000 | 4.825648000  | 3.021102000  |
| C | -2.251891000 | 3.439902000  | 3.284060000  |
| C | -1.832665000 | 2.659862000  | 2.029744000  |
| C | -2.679216000 | 1.495706000  | 1.656028000  |
| C | -4.229615000 | 5.146686000  | 0.722015000  |
| C | -4.512100000 | 7.254424000  | 0.761747000  |
| C | -3.196931000 | 7.036217000  | 1.167509000  |
| C | -4.935576000 | 8.596009000  | 0.707013000  |
| C | -2.819816000 | 9.197258000  | 1.416794000  |
| O | -0.252127000 | 4.822241000  | 3.314875000  |

|   |              |              |             |
|---|--------------|--------------|-------------|
| O | -1.720152000 | 2.809531000  | 4.436850000 |
| O | -1.869642000 | 3.654010000  | 0.973410000 |
| H | -0.966168000 | 5.509608000  | 1.074569000 |
| H | -0.127796000 | 4.226794000  | 4.069273000 |
| H | -2.150995000 | 5.630782000  | 3.553537000 |
| H | -2.230010000 | 3.078664000  | 5.210042000 |
| H | -3.340678000 | 3.515217000  | 3.338412000 |
| H | -0.794297000 | 2.341195000  | 2.168929000 |
| H | -3.705901000 | 1.734555000  | 1.388005000 |
| H | -2.574669000 | 0.629788000  | 2.300347000 |
| H | -6.834930000 | 8.255383000  | 0.025718000 |
| H | -6.420318000 | 9.922073000  | 0.259384000 |
| H | -4.355126000 | 4.084603000  | 0.599639000 |
| H | -2.156024000 | 10.015445000 | 1.675859000 |

### 22C-TS- Ado

|   |              |              |              |
|---|--------------|--------------|--------------|
| N | 0.101837000  | -0.838311000 | -0.225956000 |
| N | -1.621582000 | -0.280332000 | -1.555341000 |
| N | -2.683319000 | 1.468688000  | 1.534278000  |
| N | -0.579545000 | 0.339205000  | 1.803881000  |
| N | -3.895914000 | 1.461978000  | -0.441126000 |
| C | 1.354987000  | -1.380574000 | 0.268505000  |
| C | 2.039718000  | -2.368792000 | -0.671456000 |
| C | 2.963671000  | -1.452526000 | -1.501427000 |
| C | 3.419346000  | -0.413616000 | -0.462788000 |
| C | 3.741645000  | 0.943107000  | -0.983723000 |
| C | -0.487590000 | -0.922008000 | -1.473756000 |
| C | -1.799458000 | 0.273736000  | -0.302238000 |
| C | -0.739262000 | -0.053707000 | 0.534535000  |
| C | -2.815545000 | 1.076568000  | 0.253135000  |
| C | -1.601333000 | 1.090985000  | 2.218253000  |
| O | 2.804933000  | -3.245119000 | 0.133357000  |
| O | 4.092463000  | -2.132140000 | -2.010724000 |
| O | 2.295018000  | -0.318168000 | 0.452848000  |
| H | 1.160476000  | -1.827844000 | 1.241176000  |
| H | 3.569961000  | -3.517907000 | -0.395154000 |
| H | 1.333292000  | -2.928731000 | -1.287659000 |
| H | 3.876672000  | -2.510360000 | -2.871633000 |
| H | 2.396535000  | -0.967489000 | -2.299420000 |
| H | 4.266881000  | -0.835522000 | 0.083751000  |
| H | 2.926252000  | 1.448584000  | -1.495197000 |
| H | 4.702800000  | 1.025034000  | -1.481591000 |
| H | -4.019518000 | 1.178585000  | -1.397296000 |
| H | -4.598006000 | 2.032883000  | -0.002375000 |
| H | -0.039752000 | -1.479288000 | -2.279232000 |
| H | -1.545384000 | 1.446645000  | 3.241499000  |

|   |              |             |             |
|---|--------------|-------------|-------------|
| H | 3.977437000  | 1.788894000 | 0.154573000 |
| H | 1.393964000  | 1.718584000 | 2.695194000 |
| H | 1.594950000  | 2.770388000 | 1.445602000 |
| C | 3.421066000  | 2.202527000 | 2.324503000 |
| N | 2.002143000  | 1.958485000 | 1.910833000 |
| C | 4.250541000  | 2.626473000 | 1.116982000 |
| C | 3.505507000  | 3.274235000 | 3.404219000 |
| O | 2.515411000  | 4.169078000 | 3.289847000 |
| H | 3.876751000  | 3.562084000 | 0.700992000 |
| H | 3.784505000  | 1.273112000 | 2.754042000 |
| O | 4.390781000  | 3.320814000 | 4.215021000 |
| C | 5.718576000  | 2.625206000 | 1.274574000 |
| C | 6.473926000  | 3.700209000 | 0.793218000 |
| C | 6.408440000  | 1.539092000 | 1.833196000 |
| C | 7.858572000  | 3.706699000 | 0.876686000 |
| H | 5.969485000  | 4.550518000 | 0.350910000 |
| C | 7.789047000  | 1.533621000 | 1.922941000 |
| H | 5.865060000  | 0.676888000 | 2.198363000 |
| C | 8.522534000  | 2.621238000 | 1.446147000 |
| H | 8.423301000  | 4.552886000 | 0.503906000 |
| H | 8.314182000  | 0.692552000 | 2.356064000 |
| O | 9.878423000  | 2.563342000 | 1.562772000 |
| H | 10.280761000 | 3.364025000 | 1.202671000 |
| H | 1.975819000  | 1.137292000 | 1.265896000 |
| H | 2.621026000  | 4.862925000 | 3.962340000 |

### 22D-TS- Ado

|   |              |              |              |
|---|--------------|--------------|--------------|
| H | -3.690728000 | -1.847539000 | -1.048152000 |
| H | -3.764969000 | -0.739439000 | 0.146872000  |
| C | -1.929154000 | -0.830215000 | -0.762261000 |
| N | -3.390668000 | -0.916989000 | -0.779059000 |
| C | -1.513025000 | 0.615707000  | -0.499715000 |
| C | -1.290579000 | -1.840613000 | 0.186876000  |
| O | -1.759555000 | -1.732094000 | 1.444455000  |
| H | -2.086056000 | 0.965397000  | 0.627328000  |
| H | -1.565990000 | -1.113039000 | -1.754108000 |
| H | -2.038995000 | 1.248840000  | -1.212363000 |
| O | -0.474355000 | -2.670006000 | -0.137593000 |
| C | -0.084135000 | 0.981999000  | -0.384800000 |
| C | 0.749523000  | 0.472086000  | 0.619793000  |
| C | 0.465971000  | 1.937247000  | -1.251602000 |
| C | 2.071851000  | 0.875196000  | 0.741418000  |
| H | 0.358919000  | -0.228749000 | 1.345040000  |
| C | 1.784475000  | 2.349611000  | -1.142356000 |
| H | -0.155816000 | 2.366269000  | -2.027995000 |
| C | 2.596433000  | 1.815978000  | -0.143334000 |

|   |              |              |              |
|---|--------------|--------------|--------------|
| H | 2.693649000  | 0.469142000  | 1.530855000  |
| H | 2.195593000  | 3.085402000  | -1.821377000 |
| O | 3.887253000  | 2.256530000  | -0.074370000 |
| H | 4.346958000  | 1.826491000  | 0.657569000  |
| H | -1.343832000 | -2.417860000 | 1.992284000  |
| N | -3.061279000 | 5.636125000  | 1.143469000  |
| N | -5.203353000 | 5.999033000  | 0.581174000  |
| N | -4.076335000 | 9.513853000  | 0.906301000  |
| N | -2.310539000 | 7.947180000  | 1.360063000  |
| N | -6.232030000 | 8.886852000  | 0.323713000  |
| C | -1.821185000 | 4.935909000  | 1.482009000  |
| C | -1.574833000 | 4.874847000  | 2.995312000  |
| C | -2.140007000 | 3.488776000  | 3.352806000  |
| C | -1.773388000 | 2.668278000  | 2.108571000  |
| C | -2.605028000 | 1.463099000  | 1.839367000  |
| C | -4.283759000 | 5.096011000  | 0.818289000  |
| C | -4.555295000 | 7.205047000  | 0.761816000  |
| C | -3.222121000 | 6.999892000  | 1.110836000  |
| C | -4.976421000 | 8.544854000  | 0.660866000  |
| C | -2.825375000 | 9.168168000  | 1.232391000  |
| O | -0.175892000 | 4.914767000  | 3.215310000  |
| O | -1.529569000 | 2.921037000  | 4.498214000  |
| O | -1.915132000 | 3.608419000  | 1.017705000  |
| H | -1.005009000 | 5.465273000  | 0.987876000  |
| H | 0.001011000  | 4.366271000  | 3.994392000  |
| H | -2.079258000 | 5.690984000  | 3.518671000  |
| H | -2.011433000 | 3.198949000  | 5.286127000  |
| H | -3.225411000 | 3.542511000  | 3.465358000  |
| H | -0.718260000 | 2.386904000  | 2.194368000  |
| H | -3.654316000 | 1.661114000  | 1.633583000  |
| H | -2.436510000 | 0.638822000  | 2.524477000  |
| H | -6.933370000 | 8.181171000  | 0.183715000  |
| H | -6.500741000 | 9.855671000  | 0.309970000  |
| H | -4.420197000 | 4.030053000  | 0.757453000  |
| H | -2.146731000 | 9.994249000  | 1.417243000  |

### 23A-TS- Ado

|   |              |              |              |
|---|--------------|--------------|--------------|
| C | -1.271589000 | 1.099359000  | 0.133265000  |
| N | -1.597356000 | 0.277949000  | 1.286787000  |
| C | -0.223906000 | 0.384279000  | -0.753422000 |
| C | 1.201569000  | 0.676071000  | -0.350865000 |
| C | 2.225785000  | -0.284492000 | -0.792920000 |
| O | 3.477958000  | 0.217588000  | -0.662841000 |
| H | -0.842551000 | 2.037126000  | 0.494199000  |
| H | -0.344468000 | 0.679066000  | -1.801213000 |
| H | -0.417092000 | -0.688211000 | -0.714540000 |

|   |              |              |              |
|---|--------------|--------------|--------------|
| O | 2.023910000  | -1.419282000 | -1.178872000 |
| C | -2.488107000 | 1.450085000  | -0.734988000 |
| O | -3.477641000 | 0.745371000  | -0.738561000 |
| H | 1.319775000  | 0.631733000  | 0.954732000  |
| H | 1.505283000  | 1.708693000  | -0.506437000 |
| H | 4.108035000  | -0.477381000 | -0.911921000 |
| C | -2.299403000 | 1.002945000  | 2.343065000  |
| H | -1.628434000 | 1.748545000  | 2.768274000  |
| H | -3.209616000 | 1.517995000  | 2.006695000  |
| H | -2.575415000 | 0.307945000  | 3.136405000  |
| H | -2.170182000 | -0.498544000 | 0.972243000  |
| C | -2.389751000 | 2.703427000  | -1.560911000 |
| H | -1.408011000 | 2.799646000  | -2.026979000 |
| H | -3.173536000 | 2.735253000  | -2.314806000 |
| H | -2.499374000 | 3.555764000  | -0.884586000 |
| N | -0.672079000 | 4.274479000  | 3.325986000  |
| N | -2.427338000 | 3.856558000  | 4.666445000  |
| N | -4.244147000 | 5.254800000  | 1.757517000  |
| N | -1.866971000 | 5.196884000  | 1.404979000  |
| N | -5.268677000 | 4.504891000  | 3.698058000  |
| C | 0.665085000  | 4.240494000  | 2.756232000  |
| C | 1.794625000  | 4.239825000  | 3.789300000  |
| C | 2.143668000  | 2.741766000  | 3.901312000  |
| C | 1.910561000  | 2.249768000  | 2.464186000  |
| C | 1.560966000  | 0.807719000  | 2.327789000  |
| C | -1.129313000 | 3.784193000  | 4.532858000  |
| C | -2.866669000 | 4.411057000  | 3.479777000  |
| C | -1.794888000 | 4.673641000  | 2.632644000  |
| C | -4.149381000 | 4.721825000  | 2.988653000  |
| C | -3.124502000 | 5.460567000  | 1.055569000  |
| O | 2.880933000  | 4.958213000  | 3.231470000  |
| O | 3.489601000  | 2.517451000  | 4.275519000  |
| O | 0.818904000  | 3.055617000  | 1.981520000  |
| H | 0.744479000  | 5.107311000  | 2.102003000  |
| H | 3.690968000  | 4.552259000  | 3.575479000  |
| H | 1.491911000  | 4.679246000  | 4.742884000  |
| H | 3.551972000  | 2.482937000  | 5.237568000  |
| H | 1.455140000  | 2.241148000  | 4.585727000  |
| H | 2.812069000  | 2.482258000  | 1.885762000  |
| H | 0.608654000  | 0.510358000  | 2.753193000  |
| H | 2.382515000  | 0.121061000  | 2.509168000  |
| H | -5.224116000 | 4.083795000  | 4.609199000  |
| H | -6.166114000 | 4.717767000  | 3.297666000  |
| H | -0.458195000 | 3.393754000  | 5.279656000  |
| H | -3.264852000 | 5.894657000  | 0.071229000  |

**23B-TS- Ado**

|   |              |              |              |
|---|--------------|--------------|--------------|
| C | -1.373762000 | 0.884964000  | 0.405916000  |
| N | -2.618560000 | 0.305435000  | 0.906560000  |
| C | -0.384950000 | -0.241615000 | 0.056101000  |
| C | 1.027830000  | 0.200812000  | -0.244296000 |
| C | 2.040704000  | -0.867110000 | -0.621754000 |
| O | 3.089345000  | -0.461371000 | -1.192929000 |
| H | -0.945739000 | 1.506167000  | 1.193772000  |
| H | -0.789343000 | -0.796287000 | -0.799654000 |
| H | -0.372922000 | -0.942733000 | 0.892006000  |
| O | 1.777477000  | -2.056230000 | -0.302244000 |
| C | -1.608462000 | 1.756447000  | -0.843050000 |
| O | -2.322729000 | 1.341583000  | -1.737611000 |
| H | 1.512427000  | 0.626559000  | 0.888246000  |
| H | 1.117808000  | 1.081895000  | -0.876524000 |
| C | -3.559970000 | 1.293669000  | 1.430573000  |
| H | -3.122520000 | 1.781940000  | 2.302389000  |
| H | -3.842313000 | 2.078438000  | 0.713409000  |
| H | -4.472172000 | 0.789565000  | 1.751726000  |
| H | -3.057023000 | -0.207470000 | 0.147911000  |
| C | -0.971387000 | 3.112683000  | -0.900609000 |
| H | -1.016393000 | 3.518985000  | -1.909591000 |
| H | -1.519596000 | 3.771858000  | -0.218607000 |
| H | 0.051052000  | 3.086808000  | -0.525612000 |
| N | -0.736825000 | 4.121277000  | 3.227995000  |
| N | -2.319399000 | 3.375931000  | 4.638350000  |
| N | -4.478007000 | 5.271774000  | 2.299822000  |
| N | -2.156714000 | 5.380062000  | 1.687541000  |
| N | -5.259156000 | 4.114601000  | 4.152008000  |
| C | 0.540666000  | 4.236993000  | 2.547350000  |
| C | 1.740296000  | 4.488858000  | 3.471862000  |
| C | 2.386494000  | 3.093219000  | 3.580604000  |
| C | 2.084398000  | 2.474565000  | 2.206103000  |
| C | 1.998486000  | 0.986913000  | 2.168351000  |
| C | -1.045539000 | 3.374559000  | 4.345107000  |
| C | -2.897989000 | 4.156603000  | 3.655118000  |
| C | -1.934369000 | 4.623003000  | 2.765881000  |
| C | -4.232591000 | 4.510254000  | 3.380896000  |
| C | -3.450404000 | 5.655162000  | 1.534574000  |
| O | 2.614556000  | 5.387290000  | 2.810370000  |
| O | 3.786848000  | 3.151138000  | 3.787338000  |
| O | 0.804236000  | 3.029897000  | 1.847546000  |
| H | 0.432595000  | 5.061537000  | 1.843536000  |
| H | 3.516297000  | 5.124354000  | 3.050555000  |
| H | 1.431604000  | 4.891160000  | 4.440258000  |
| H | 3.968018000  | 3.185428000  | 4.734094000  |



|   |              |             |             |
|---|--------------|-------------|-------------|
| H | 1.900123000  | 2.510800000 | 4.366299000 |
| H | 2.844467000  | 2.834938000 | 1.503197000 |
| H | 1.250221000  | 0.559985000 | 2.832584000 |
| H | 2.956883000  | 0.477338000 | 2.201164000 |
| H | -5.104315000 | 3.501960000 | 4.933266000 |
| H | -6.201811000 | 4.343427000 | 3.887138000 |
| H | -0.285666000 | 2.851364000 | 4.902198000 |
| H | -3.709547000 | 6.265235000 | 0.675844000 |

#### 24-TS- Ado

|   |              |              |              |
|---|--------------|--------------|--------------|
| H | -0.803835000 | -0.527866000 | 0.400058000  |
| C | -0.725095000 | -1.943921000 | 2.501643000  |
| H | -0.887908000 | -1.404689000 | 3.437107000  |
| H | -0.654493000 | -3.005002000 | 2.738552000  |
| H | 0.213075000  | -1.606493000 | 2.061877000  |
| C | -1.928102000 | -1.724284000 | 1.612123000  |
| H | -2.283273000 | 0.617835000  | -0.822009000 |
| H | -5.927028000 | -0.103720000 | 0.652885000  |
| O | -3.019493000 | -2.234823000 | 1.863191000  |
| C | -3.989547000 | -0.027746000 | 0.334021000  |
| C | -2.743931000 | -0.525083000 | -0.391524000 |
| N | -1.725571000 | -0.921093000 | 0.544931000  |
| C | -2.815105000 | -1.361962000 | -1.673500000 |
| O | -3.875784000 | 0.980637000  | 1.036245000  |
| N | -5.203280000 | -0.600519000 | 0.154177000  |
| H | -3.277418000 | -2.322223000 | -1.430300000 |
| C | -1.411745000 | -1.666534000 | -2.211971000 |
| H | -0.860790000 | -0.747073000 | -2.421391000 |
| H | -0.827230000 | -2.256995000 | -1.506915000 |
| H | -1.488918000 | -2.231008000 | -3.142463000 |
| C | -3.652423000 | -0.663487000 | -2.751169000 |
| H | -3.147480000 | 0.239820000  | -3.099862000 |
| H | -3.785149000 | -1.322663000 | -3.610059000 |
| H | -4.638675000 | -0.372419000 | -2.391199000 |
| C | -5.517950000 | -1.978055000 | -0.209731000 |
| H | -6.490425000 | -2.218881000 | 0.215157000  |
| H | -5.579619000 | -2.117395000 | -1.289405000 |
| H | -4.780808000 | -2.658893000 | 0.210450000  |
| N | 2.593955000  | 0.814393000  | -0.073053000 |
| N | 4.132888000  | 0.301199000  | -1.625442000 |
| N | 4.562933000  | -2.622196000 | 0.613258000  |
| N | 2.860478000  | -1.117677000 | 1.395564000  |
| N | 5.802857000  | -2.263771000 | -1.313479000 |
| C | 1.463696000  | 1.439905000  | 0.561726000  |
| C | 1.456129000  | 2.983356000  | 0.575708000  |
| C | 0.233679000  | 3.338602000  | -0.304950000 |

|   |              |              |              |
|---|--------------|--------------|--------------|
| C | -0.670064000 | 2.112484000  | -0.122669000 |
| C | -1.690270000 | 1.867935000  | -1.176860000 |
| C | 3.215340000  | 1.154695000  | -1.257044000 |
| C | 4.113102000  | -0.673983000 | -0.644176000 |
| C | 3.157426000  | -0.379806000 | 0.322739000  |
| C | 4.844262000  | -1.863742000 | -0.461882000 |
| C | 3.609626000  | -2.216652000 | 1.459140000  |
| O | 1.254845000  | 3.411090000  | 1.910720000  |
| O | -0.427647000 | 4.511485000  | 0.130929000  |
| O | 0.282032000  | 1.029243000  | -0.132117000 |
| H | 1.440526000  | 1.075262000  | 1.589162000  |
| H | 0.705456000  | 4.209149000  | 1.865173000  |
| H | 2.385401000  | 3.399780000  | 0.180049000  |
| H | -0.090517000 | 5.271116000  | -0.357998000 |
| H | 0.536029000  | 3.415269000  | -1.351557000 |
| H | -1.151220000 | 2.178204000  | 0.860365000  |
| H | -1.290829000 | 1.708100000  | -2.174513000 |
| H | -2.552298000 | 2.524397000  | -1.136557000 |
| H | 6.012645000  | -1.727938000 | -2.137104000 |
| H | 6.280111000  | -3.135153000 | -1.158724000 |
| H | 2.944620000  | 2.047528000  | -1.797688000 |
| H | 3.424462000  | -2.871806000 | 2.303742000  |

### 25-TS- Ado

|   |              |              |              |
|---|--------------|--------------|--------------|
| H | 2.357974000  | 3.464301000  | -0.419055000 |
| H | -2.737141000 | 0.692056000  | 0.615184000  |
| H | -2.427922000 | 2.119929000  | -0.382349000 |
| H | -1.633169000 | -2.478600000 | -0.674092000 |
| H | 0.991876000  | -3.123848000 | -0.580246000 |
| H | 3.385502000  | -0.111429000 | -0.255174000 |
| H | 3.531096000  | -0.115079000 | 1.393224000  |
| H | -0.592093000 | 0.877149000  | -1.544959000 |
| H | -1.082725000 | -1.111170000 | 0.968220000  |
| H | 1.210631000  | -1.040007000 | -1.279482000 |
| H | 1.243097000  | -0.500877000 | 1.724311000  |
| H | 1.618331000  | 1.859999000  | 1.194846000  |
| C | 1.832049000  | 2.877516000  | -1.177037000 |
| O | 1.829989000  | 1.489053000  | -0.822986000 |
| O | -3.177439000 | 0.542940000  | -1.420513000 |
| C | -2.369555000 | 1.031554000  | -0.359755000 |
| O | -1.403672000 | -1.648306000 | -1.137444000 |
| O | 1.093014000  | -2.521114000 | 0.166026000  |
| N | 3.016381000  | -0.518916000 | 0.609202000  |
| O | -0.159697000 | 1.408727000  | 0.422115000  |
| C | -0.905676000 | 0.626445000  | -0.522999000 |
| C | -0.656911000 | -0.849192000 | -0.269039000 |

|   |              |               |              |
|---|--------------|---------------|--------------|
| C | 0.821760000  | -1.192777000  | -0.264834000 |
| C | 1.230373000  | 1.205549000   | 0.407636000  |
| H | -2.993601000 | -0.404333000  | -1.505164000 |
| H | 2.353720000  | 2.952726000   | -2.127409000 |
| H | 0.811982000  | 3.249151000   | -1.285557000 |
| C | 1.540585000  | -0.265393000  | 0.704862000  |
| H | 3.186717000  | -1.528983000  | 0.601240000  |
| N | -1.527841000 | -5.639348000  | 1.255230000  |
| N | 0.552053000  | -6.321788000  | 1.745685000  |
| N | -1.088783000 | -9.627289000  | 1.407636000  |
| N | -2.616249000 | -7.810662000  | 1.027608000  |
| N | 1.149739000  | -9.333968000  | 1.938618000  |
| C | -2.661900000 | -4.761448000  | 0.968966000  |
| C | -3.659531000 | -4.696143000  | 2.127798000  |
| C | -3.143299000 | -3.484765000  | 2.925428000  |
| C | -2.662146000 | -2.541609000  | 1.815294000  |
| C | -1.577637000 | -1.583505000  | 2.181760000  |
| C | -0.228801000 | -5.288149000  | 1.549180000  |
| C | -0.271755000 | -7.416655000  | 1.572375000  |
| C | -1.568457000 | -7.012982000  | 1.262913000  |
| C | -0.049821000 | -8.805587000  | 1.642393000  |
| C | -2.282695000 | -9.096445000  | 1.119909000  |
| O | -4.938705000 | -4.429534000  | 1.584361000  |
| O | -4.156083000 | -2.846919000  | 3.680027000  |
| O | -2.176750000 | -3.448006000  | 0.779740000  |
| H | -3.146628000 | -5.120662000  | 0.061179000  |
| H | -5.421796000 | -3.905764000  | 2.240869000  |
| H | -3.659567000 | -5.620130000  | 2.710689000  |
| H | -4.216934000 | -3.264160000  | 4.547593000  |
| H | -2.304113000 | -3.786346000  | 3.556957000  |
| H | -3.530910000 | -2.009972000  | 1.417709000  |
| H | -0.702419000 | -2.037244000  | 2.639937000  |
| H | -1.922006000 | -0.692747000  | 2.697867000  |
| H | 1.948441000  | -8.741360000  | 2.081273000  |
| H | 1.271321000  | -10.332068000 | 1.942162000  |
| H | 0.075698000  | -4.255362000  | 1.574590000  |
| H | -3.079406000 | -9.810426000  | 0.939634000  |

### 26-TS- Ado

|   |              |              |              |
|---|--------------|--------------|--------------|
| N | 0.703816000  | 0.308246000  | 0.436989000  |
| N | 2.019135000  | -1.419542000 | -0.129307000 |
| N | 4.626321000  | 1.163856000  | 0.378923000  |
| N | 2.413466000  | 2.015044000  | 0.774763000  |
| N | 5.066834000  | -1.020298000 | -0.265471000 |
| C | -0.493710000 | 1.095277000  | 0.735495000  |
| C | -0.869036000 | 2.045603000  | -0.408558000 |

|   |               |              |              |
|---|---------------|--------------|--------------|
| C | -1.892728000  | 1.204719000  | -1.191342000 |
| C | -2.607361000  | 0.461336000  | -0.062720000 |
| C | 0.789140000   | -1.015753000 | 0.072052000  |
| C | 2.792667000   | -0.301943000 | 0.114694000  |
| C | 1.993131000   | 0.781823000  | 0.470765000  |
| C | 4.180695000   | -0.068172000 | 0.074251000  |
| C | 3.739454000   | 2.111504000  | 0.704323000  |
| O | -1.487916000  | 3.188083000  | 0.154795000  |
| O | -2.828234000  | 1.988402000  | -1.909056000 |
| O | -1.580494000  | 0.211634000  | 0.916989000  |
| H | -0.299221000  | 1.658014000  | 1.649300000  |
| H | -2.171199000  | 3.477685000  | -0.468251000 |
| H | 0.003235000   | 2.322703000  | -1.004654000 |
| H | -2.477895000  | 2.179098000  | -2.787228000 |
| H | -1.373350000  | 0.502404000  | -1.848464000 |
| H | -3.350912000  | 1.136916000  | 0.369755000  |
| H | 4.762307000   | -1.962290000 | -0.437335000 |
| H | 6.052141000   | -0.823632000 | -0.225120000 |
| H | -0.093275000  | -1.626802000 | -0.009099000 |
| H | 4.160717000   | 3.083098000  | 0.940145000  |
| C | -3.256636000  | -0.834836000 | -0.492163000 |
| H | -3.971784000  | -0.607741000 | -1.283512000 |
| H | -2.511312000  | -1.526252000 | -0.887314000 |
| S | -4.165618000  | -1.624504000 | 0.884989000  |
| C | -5.301642000  | -2.635919000 | -0.023499000 |
| H | -6.164793000  | -1.887288000 | -0.674610000 |
| H | -4.836030000  | -3.248316000 | -0.794100000 |
| H | -5.906154000  | -3.222622000 | 0.664253000  |
| N | -7.439305000  | 1.838751000  | 1.189060000  |
| N | -5.423004000  | 2.811174000  | 1.010360000  |
| N | -7.380518000  | 5.747687000  | 2.131363000  |
| N | -8.736081000  | 3.770348000  | 1.946776000  |
| N | -5.114229000  | 5.799719000  | 1.629522000  |
| C | -8.443449000  | 0.758887000  | 1.221163000  |
| C | -9.605169000  | 1.032755000  | 0.267907000  |
| C | -9.068960000  | 0.438122000  | -1.045211000 |
| C | -8.231896000  | -0.764908000 | -0.570262000 |
| C | -7.029724000  | -1.059688000 | -1.408948000 |
| C | -6.104150000  | 1.698268000  | 0.891914000  |
| C | -6.356884000  | 3.741309000  | 1.421170000  |
| C | -7.615845000  | 3.155013000  | 1.548960000  |
| C | -6.265844000  | 5.110797000  | 1.731784000  |
| C | -8.523722000  | 5.056615000  | 2.215484000  |
| O | -10.726558000 | 0.301917000  | 0.732108000  |
| O | -10.099016000 | -0.013046000 | -1.909158000 |
| O | -7.840621000  | -0.432781000 | 0.792439000  |

|   |               |              |              |
|---|---------------|--------------|--------------|
| H | -8.789933000  | 0.645942000  | 2.248940000  |
| H | -11.209036000 | 0.002154000  | -0.052840000 |
| H | -9.832660000  | 2.097546000  | 0.191001000  |
| H | -10.392575000 | 0.721606000  | -2.461115000 |
| H | -8.431997000  | 1.171138000  | -1.545104000 |
| H | -8.887715000  | -1.637688000 | -0.516977000 |
| H | -6.394503000  | -0.198845000 | -1.609346000 |
| H | -7.242080000  | -1.640628000 | -2.302234000 |
| H | -4.254716000  | 5.318533000  | 1.429155000  |
| H | -5.074349000  | 6.751255000  | 1.952819000  |
| H | -5.701994000  | 0.737243000  | 0.622756000  |
| H | -9.387416000  | 5.623232000  | 2.547283000  |

**27-TS- Ado**

|   |              |              |              |
|---|--------------|--------------|--------------|
| H | -0.132478000 | 0.684135000  | -0.197120000 |
| C | -1.059299000 | 3.467409000  | -1.820462000 |
| H | -1.746955000 | 4.026389000  | -1.182097000 |
| H | -0.366408000 | 4.173681000  | -2.271175000 |
| H | -1.629306000 | 2.968727000  | -2.599843000 |
| C | -0.260805000 | 2.500533000  | -0.980632000 |
| H | -4.110291000 | 0.802831000  | -1.362122000 |
| H | -1.961651000 | -0.445758000 | -0.374339000 |
| H | -2.445014000 | -1.045477000 | -4.007681000 |
| H | -3.299266000 | 2.330163000  | -1.204551000 |
| O | 0.860906000  | 2.799950000  | -0.573401000 |
| C | -1.788028000 | 0.137037000  | -2.563006000 |
| C | -1.975517000 | 0.635502000  | -1.136266000 |
| N | -0.808726000 | 1.303829000  | -0.627075000 |
| C | -3.316479000 | 1.310081000  | -0.818814000 |
| O | -0.878431000 | 0.584448000  | -3.262703000 |
| N | -2.623094000 | -0.811744000 | -3.041553000 |
| C | -3.644693000 | 1.328602000  | 0.655671000  |
| C | -4.544897000 | 0.405256000  | 1.188904000  |
| C | -3.035950000 | 2.241111000  | 1.519377000  |
| C | -4.820153000 | 0.380722000  | 2.552220000  |
| H | -5.035414000 | -0.304071000 | 0.532814000  |
| C | -3.307187000 | 2.219917000  | 2.883098000  |
| H | -2.342167000 | 2.971933000  | 1.125103000  |
| C | -4.197694000 | 1.286239000  | 3.405248000  |
| H | -5.520828000 | -0.344700000 | 2.946317000  |
| H | -2.824450000 | 2.934659000  | 3.537862000  |
| H | -4.409334000 | 1.269287000  | 4.466858000  |
| C | -3.715944000 | -1.524156000 | -2.399001000 |
| H | -3.608888000 | -1.514185000 | -1.320405000 |
| H | -4.686894000 | -1.095668000 | -2.658238000 |
| H | -3.698166000 | -2.563358000 | -2.724674000 |

|   |              |              |              |
|---|--------------|--------------|--------------|
| N | 2.562941000  | -1.069633000 | 0.506045000  |
| N | 3.365481000  | 0.161058000  | 2.205831000  |
| N | 4.969083000  | 1.951308000  | -0.614095000 |
| N | 3.613593000  | 0.110713000  | -1.356139000 |
| N | 5.248889000  | 2.518014000  | 1.617864000  |
| C | 1.726784000  | -1.982927000 | -0.243430000 |
| C | 1.496452000  | -3.347750000 | 0.417071000  |
| C | 0.088365000  | -3.202833000 | 1.031479000  |
| C | -0.610179000 | -2.266698000 | 0.033449000  |
| C | -1.711802000 | -1.435977000 | 0.598347000  |
| C | 2.602979000  | -0.843903000 | 1.867167000  |
| C | 3.850982000  | 0.646928000  | 1.005693000  |
| C | 3.359903000  | -0.097716000 | -0.061571000 |
| C | 4.699669000  | 1.723171000  | 0.683633000  |
| C | 4.424376000  | 1.151057000  | -1.537290000 |
| O | 1.487184000  | -4.323215000 | -0.610145000 |
| O | -0.606906000 | -4.432397000 | 1.107993000  |
| O | 0.439549000  | -1.392584000 | -0.424472000 |
| H | 2.204695000  | -2.112037000 | -1.213263000 |
| H | 0.864155000  | -5.013089000 | -0.335213000 |
| H | 2.261026000  | -3.577826000 | 1.163174000  |
| H | -0.421946000 | -4.852651000 | 1.956343000  |
| H | 0.149370000  | -2.723089000 | 2.010905000  |
| H | -0.968300000 | -2.872683000 | -0.805852000 |
| H | -1.432549000 | -0.816356000 | 1.446999000  |
| H | -2.658165000 | -1.948452000 | 0.730933000  |
| H | 5.010162000  | 2.405259000  | 2.587428000  |
| H | 5.796783000  | 3.313469000  | 1.338046000  |
| H | 2.054241000  | -1.460834000 | 2.560023000  |
| H | 4.677166000  | 1.385629000  | -2.565869000 |

### 28-TS- Ado

|   |              |              |              |
|---|--------------|--------------|--------------|
| H | 0.923513000  | 0.245780000  | 2.140723000  |
| C | 2.698848000  | 0.152091000  | -0.695367000 |
| H | 2.468423000  | 1.081320000  | -1.216594000 |
| H | 3.760860000  | -0.056991000 | -0.792153000 |
| H | 2.124155000  | -0.647067000 | -1.161262000 |
| C | 2.368877000  | 0.280732000  | 0.771463000  |
| H | -1.044601000 | 0.357458000  | 1.204449000  |
| H | -1.471704000 | -2.857486000 | -0.591912000 |
| O | 3.253395000  | 0.353070000  | 1.624072000  |
| C | -0.291009000 | -1.430329000 | 0.109659000  |
| C | -0.104639000 | 0.065626000  | 0.344989000  |
| N | 1.060254000  | 0.345695000  | 1.141792000  |
| O | 0.591095000  | -2.227826000 | 0.431028000  |
| N | -1.448478000 | -1.860376000 | -0.437599000 |

|   |              |              |              |
|---|--------------|--------------|--------------|
| C | -0.314444000 | 0.942911000  | -0.867672000 |
| C | -1.385056000 | 2.013309000  | -0.918425000 |
| C | 0.058044000  | 2.400192000  | -0.830363000 |
| H | -0.143048000 | 0.439351000  | -1.812107000 |
| H | -1.999812000 | 2.156205000  | -0.040980000 |
| H | -1.905176000 | 2.145966000  | -1.857355000 |
| H | 0.539909000  | 2.817429000  | -1.704380000 |
| H | 0.418448000  | 2.786901000  | 0.113391000  |
| C | -2.613167000 | -1.104087000 | -0.872967000 |
| H | -2.803824000 | -0.263944000 | -0.213022000 |
| H | -2.500158000 | -0.726014000 | -1.890452000 |
| H | -3.478023000 | -1.763521000 | -0.838186000 |
| N | 0.760658000  | 0.018531000  | 5.649499000  |
| N | 1.775129000  | 1.943321000  | 6.198777000  |
| N | 3.334381000  | -0.281188000 | 8.718400000  |
| N | 1.779900000  | -1.453062000 | 7.308344000  |
| N | 3.786008000  | 1.985560000  | 8.525184000  |
| C | -0.119331000 | -0.929890000 | 4.980825000  |
| C | -1.517845000 | -1.028481000 | 5.609842000  |
| C | -2.362224000 | -0.128644000 | 4.687193000  |
| C | -1.700705000 | -0.369453000 | 3.321837000  |
| C | -1.878764000 | 0.713562000  | 2.315566000  |
| C | 0.917472000  | 1.363366000  | 5.397947000  |
| C | 2.208699000  | 0.930580000  | 7.032008000  |
| C | 1.590450000  | -0.274209000 | 6.706217000  |
| C | 3.125398000  | 0.895187000  | 8.100464000  |
| C | 2.667273000  | -1.361533000 | 8.296706000  |
| O | -1.943227000 | -2.375498000 | 5.515646000  |
| O | -3.722778000 | -0.510801000 | 4.635290000  |
| O | -0.298447000 | -0.503337000 | 3.641625000  |
| H | 0.372140000  | -1.902535000 | 5.017136000  |
| H | -2.906282000 | -2.360898000 | 5.408797000  |
| H | -1.514659000 | -0.685687000 | 6.647631000  |
| H | -4.213624000 | -0.040081000 | 5.319202000  |
| H | -2.251336000 | 0.918162000  | 4.979457000  |
| H | -2.071976000 | -1.323217000 | 2.931655000  |
| H | -1.469128000 | 1.681723000  | 2.592406000  |
| H | -2.875418000 | 0.764607000  | 1.889935000  |
| H | 3.676215000  | 2.866082000  | 8.053830000  |
| H | 4.459701000  | 1.906381000  | 9.267418000  |
| H | 0.385927000  | 1.847132000  | 4.596514000  |
| H | 2.879620000  | -2.279836000 | 8.833965000  |

Cartesian coordinates of all reactant and products complexes of **substrates 1-28** with 5'-dAdo.

**1A-RC-complex**

|   |              |              |              |
|---|--------------|--------------|--------------|
| N | -2.803414000 | 1.001473000  | -0.395961000 |
| N | -1.870811000 | 2.523311000  | -1.757121000 |
| N | -0.404346000 | 3.641410000  | 1.455744000  |
| N | -1.856882000 | 1.746138000  | 1.729393000  |
| N | 0.002447000  | 4.658582000  | -0.588576000 |
| C | -3.557016000 | -0.159492000 | 0.039352000  |
| C | -5.082945000 | 0.028198000  | 0.041249000  |
| C | -5.523911000 | -0.719843000 | -1.230741000 |
| C | -4.489957000 | -1.865462000 | -1.302492000 |
| C | -4.288844000 | -2.462116000 | -2.631832000 |
| C | -2.652618000 | 1.477349000  | -1.680053000 |
| C | -1.478910000 | 2.757581000  | -0.452910000 |
| C | -2.047062000 | 1.822700000  | 0.408758000  |
| C | -0.614479000 | 3.704513000  | 0.128730000  |
| C | -1.022905000 | 2.688672000  | 2.162803000  |
| O | -5.600434000 | -0.608563000 | 1.195898000  |
| O | -6.829064000 | -1.254746000 | -1.132278000 |
| O | -3.272322000 | -1.230519000 | -0.859348000 |
| H | -3.209685000 | -0.403859000 | 1.043607000  |
| H | -6.478032000 | -0.945784000 | 0.960254000  |
| H | -5.353964000 | 1.087016000  | 0.021627000  |
| H | -7.464087000 | -0.613518000 | -1.472147000 |
| H | -5.422547000 | -0.073367000 | -2.104939000 |
| H | -4.797505000 | -2.625118000 | -0.573937000 |
| H | -3.648402000 | -1.966044000 | -3.347976000 |
| H | -4.874520000 | -3.315803000 | -2.937482000 |
| H | -0.108601000 | 4.700479000  | -1.586285000 |
| H | 0.644301000  | 5.288288000  | -0.138562000 |
| H | -3.129504000 | 0.993272000  | -2.516108000 |
| H | -0.813269000 | 2.687245000  | 3.227189000  |
| H | 10.254995000 | 0.419050000  | -1.465322000 |
| H | 7.755940000  | 0.030724000  | 0.907716000  |
| H | 7.096260000  | 1.156092000  | -0.247455000 |
| H | 5.805310000  | -0.716646000 | -1.338346000 |
| H | 6.463937000  | -1.844592000 | -0.173284000 |
| H | 5.380473000  | -0.556844000 | 1.688006000  |
| H | 4.726116000  | 0.576260000  | 0.521068000  |
| H | 3.452007000  | -1.280979000 | -0.566407000 |
| H | 4.092671000  | -2.413376000 | 0.604538000  |
| H | 3.015788000  | -1.166164000 | 2.459280000  |
| H | 2.387022000  | 0.023837000  | 1.339231000  |
| H | 1.576683000  | 0.031561000  | -0.993718000 |
| H | 0.293341000  | 0.424651000  | 0.158247000  |
| H | -0.111370000 | -0.205245000 | -1.442419000 |
| H | 0.553394000  | -1.863488000 | 3.200659000  |



|   |              |              |              |
|---|--------------|--------------|--------------|
| H | 1.745352000  | -2.955969000 | 1.277427000  |
| H | 1.007434000  | -2.376437000 | -0.854851000 |
| H | -1.513244000 | -2.012607000 | -0.223825000 |
| O | 8.532130000  | -1.049908000 | -1.895738000 |
| O | 9.548442000  | 0.646833000  | -0.839106000 |
| C | 8.508570000  | -0.187635000 | -1.049083000 |
| C | 7.367018000  | 0.104566000  | -0.112414000 |
| C | 6.159480000  | -0.803172000 | -0.307576000 |
| C | 5.022537000  | -0.469824000 | 0.656131000  |
| C | 3.800970000  | -1.366615000 | 0.467321000  |
| C | 2.664188000  | -1.029052000 | 1.431778000  |
| C | 0.600296000  | -0.275111000 | -0.618551000 |
| O | -1.897035000 | -2.061209000 | 2.342717000  |
| C | -0.847320000 | -1.968067000 | 1.710156000  |
| N | 0.388627000  | -1.659338000 | 2.227546000  |
| C | 1.435761000  | -1.903547000 | 1.232249000  |
| C | 0.631176000  | -1.704890000 | -0.083249000 |
| N | -0.696221000 | -2.144473000 | 0.360304000  |

### **1B-PC-complex**

|   |              |              |              |
|---|--------------|--------------|--------------|
| N | 1.523885000  | -1.361722000 | -0.423277000 |
| N | -0.314656000 | -2.133943000 | -1.454441000 |
| N | -1.268702000 | -2.861083000 | 2.049737000  |
| N | 0.909095000  | -1.859112000 | 1.890348000  |
| N | -2.606308000 | -3.314650000 | 0.209515000  |
| C | 2.798610000  | -0.704321000 | -0.247238000 |
| C | 4.033737000  | -1.464698000 | -0.797352000 |
| C | 4.695130000  | -0.416702000 | -1.734764000 |
| C | 4.082279000  | 0.904744000  | -1.271589000 |
| C | 4.056510000  | 2.008788000  | -2.299287000 |
| C | 0.849897000  | -1.557660000 | -1.608863000 |
| C | -0.421804000 | -2.333468000 | -0.091481000 |
| C | 0.709942000  | -1.858979000 | 0.567189000  |
| C | -1.453497000 | -2.844874000 | 0.716894000  |
| C | -0.125671000 | -2.381020000 | 2.548426000  |
| O | 4.889175000  | -1.824804000 | 0.270434000  |
| O | 6.108426000  | -0.381275000 | -1.599670000 |
| O | 2.739617000  | 0.534452000  | -0.934471000 |
| H | 2.940592000  | -0.552892000 | 0.823852000  |
| H | 5.780385000  | -1.536179000 | 0.015375000  |
| H | 3.726159000  | -2.359379000 | -1.343708000 |
| H | 6.509534000  | -0.939630000 | -2.275715000 |
| H | 4.406245000  | -0.612356000 | -2.769122000 |
| H | 4.601534000  | 1.233694000  | -0.362972000 |
| H | 3.496639000  | 1.694485000  | -3.182070000 |
| H | 5.076760000  | 2.252970000  | -2.598338000 |

|   |              |              |              |
|---|--------------|--------------|--------------|
| H | -2.809903000 | -3.197459000 | -0.768011000 |
| H | -3.357878000 | -3.556609000 | 0.832926000  |
| H | 1.270480000  | -1.236258000 | -2.547759000 |
| H | -0.036075000 | -2.410849000 | 3.628851000  |
| H | -8.800784000 | -0.083265000 | -1.766013000 |
| H | -5.832729000 | -0.852498000 | -0.149017000 |
| H | -5.343451000 | -0.340888000 | -1.740539000 |
| H | -4.772503000 | 1.942232000  | -0.838953000 |
| H | -5.272205000 | 1.434399000  | 0.760046000  |
| H | -3.503341000 | -0.346144000 | 0.746795000  |
| H | -3.001710000 | 0.163373000  | -0.850179000 |
| H | -2.406168000 | 2.420266000  | 0.051248000  |
| H | -2.908941000 | 1.915070000  | 1.654924000  |
| H | -1.212113000 | 0.091616000  | 1.623642000  |
| H | -0.683049000 | 0.589527000  | 0.026795000  |
| H | -0.442829000 | 3.369586000  | -1.337738000 |
| H | 1.020534000  | 2.217934000  | -1.198355000 |
| H | 3.592830000  | 2.906776000  | -1.890616000 |
| H | 1.222817000  | 0.343312000  | 2.336512000  |
| H | -0.560104000 | 2.324419000  | 2.526158000  |
| H | -0.203447000 | 4.007609000  | 0.996367000  |
| H | 2.418085000  | 3.792299000  | 0.672494000  |
| O | -7.567448000 | 1.628390000  | -0.839250000 |
| O | -7.914219000 | -0.448248000 | -1.610813000 |
| C | -7.145993000 | 0.518417000  | -1.065367000 |
| C | -5.749431000 | 0.027794000  | -0.793632000 |
| C | -4.833255000 | 1.075877000  | -0.174864000 |
| C | -3.433799000 | 0.526846000  | 0.088729000  |
| C | -2.486996000 | 1.551572000  | 0.711845000  |
| C | -1.104798000 | 0.957608000  | 0.964780000  |
| C | 0.330969000  | 2.911424000  | -0.738537000 |
| O | 3.402080000  | 1.777125000  | 1.950772000  |
| C | 2.226637000  | 2.056641000  | 1.723300000  |
| N | 1.148511000  | 1.263291000  | 1.928787000  |
| C | -0.114516000 | 1.912128000  | 1.612765000  |
| C | 0.377032000  | 3.124216000  | 0.730779000  |
| N | 1.762129000  | 3.260609000  | 1.224574000  |

### 1B-RC-complex

|   |              |              |              |
|---|--------------|--------------|--------------|
| 7 | -3.053715000 | 1.047093000  | -0.647082000 |
| 7 | -1.792224000 | 2.283620000  | -2.035056000 |
| 7 | -0.635260000 | 3.677593000  | 1.195699000  |
| 7 | -2.307935000 | 1.976812000  | 1.483926000  |
| 7 | 0.133144000  | 4.378649000  | -0.877786000 |
| 6 | -3.903130000 | -0.018743000 | -0.162802000 |
| 6 | -5.180128000 | -0.251353000 | -0.982123000 |

|   |              |              |              |
|---|--------------|--------------|--------------|
| 6 | -4.834865000 | -1.499525000 | -1.817876000 |
| 6 | -3.910623000 | -2.285959000 | -0.862551000 |
| 6 | -2.976107000 | -3.222199000 | -1.507641000 |
| 6 | -2.675841000 | 1.325688000  | -1.945139000 |
| 6 | -1.554160000 | 2.659046000  | -0.726018000 |
| 6 | -2.321924000 | 1.900338000  | 0.151353000  |
| 6 | -0.670158000 | 3.588353000  | -0.145906000 |
| 6 | -1.438925000 | 2.887677000  | 1.916837000  |
| 8 | -6.227809000 | -0.538890000 | -0.073543000 |
| 8 | -5.970209000 | -2.278222000 | -2.137706000 |
| 8 | -3.171512000 | -1.247576000 | -0.186730000 |
| 1 | -4.158381000 | 0.235425000  | 0.864839000  |
| 1 | -6.826806000 | -1.154601000 | -0.522714000 |
| 1 | -5.429462000 | 0.613579000  | -1.602300000 |
| 1 | -6.334485000 | -1.981776000 | -2.980265000 |
| 1 | -4.281952000 | -1.216610000 | -2.715893000 |
| 1 | -4.555338000 | -2.807203000 | -0.145059000 |
| 1 | -2.059628000 | -2.844194000 | -1.939393000 |
| 1 | -3.253917000 | -4.254825000 | -1.655082000 |
| 1 | 0.174739000  | 4.276741000  | -1.876678000 |
| 1 | 0.802120000  | 4.972786000  | -0.418681000 |
| 1 | -3.091126000 | 0.788632000  | -2.782193000 |
| 1 | -1.365598000 | 3.003929000  | 2.992765000  |
| 1 | 7.825466000  | 0.103379000  | 0.429570000  |
| 1 | 7.052255000  | 1.091561000  | -0.779815000 |
| 1 | 5.550928000  | -0.828266000 | -1.393261000 |
| 1 | 6.318973000  | -1.817127000 | -0.175928000 |
| 1 | 5.568751000  | -0.205249000 | 1.602945000  |
| 1 | 4.789058000  | 0.773695000  | 0.376300000  |
| 1 | 3.314547000  | -1.160906000 | -0.221627000 |
| 1 | 4.080059000  | -2.129859000 | 1.018278000  |
| 1 | 3.318707000  | -0.545168000 | 2.775130000  |
| 1 | 2.560200000  | 0.473175000  | 1.569665000  |
| 1 | 1.423945000  | 0.137727000  | -0.587184000 |
| 1 | 0.303043000  | 0.764057000  | 0.630877000  |
| 1 | -0.309848000 | -0.116366000 | -0.773854000 |
| 1 | 0.977373000  | -1.008959000 | 3.959464000  |
| 1 | 1.853259000  | -2.443862000 | 2.102013000  |
| 1 | 0.824029000  | -2.193174000 | 0.029197000  |
| 1 | -1.563876000 | -1.599228000 | 0.919567000  |
| 8 | 8.053053000  | -1.364606000 | -2.338626000 |
| 8 | 9.432260000  | 0.243065000  | -1.600946000 |
| 6 | 8.351446000  | -0.404488000 | -1.585219000 |
| 6 | 7.313365000  | 0.055208000  | -0.536980000 |
| 6 | 6.047736000  | -0.785247000 | -0.419852000 |
| 6 | 5.069536000  | -0.255819000 | 0.628178000  |

|   |              |              |              |
|---|--------------|--------------|--------------|
| 6 | 3.804448000  | -1.102526000 | 0.755558000  |
| 6 | 2.825466000  | -0.562157000 | 1.797881000  |
| 6 | 0.500466000  | -0.067373000 | -0.045666000 |
| 8 | -1.571596000 | -1.237934000 | 3.506143000  |
| 6 | -0.628533000 | -1.286093000 | 2.719874000  |
| 7 | 0.676743000  | -0.948696000 | 2.999299000  |
| 6 | 1.562453000  | -1.400215000 | 1.922842000  |
| 6 | 0.579200000  | -1.385733000 | 0.719426000  |
| 7 | -0.680589000 | -1.681827000 | 1.410358000  |

### 1B-PC-complex

|   |              |              |              |
|---|--------------|--------------|--------------|
| N | 1.491495000  | -1.357698000 | -0.434605000 |
| N | -0.342452000 | -2.120030000 | -1.481234000 |
| N | -1.314095000 | -2.875824000 | 2.011890000  |
| N | 0.865249000  | -1.874381000 | 1.871648000  |
| N | -2.642647000 | -3.315153000 | 0.161180000  |
| C | 2.765948000  | -0.703216000 | -0.246835000 |
| C | 4.002982000  | -1.460575000 | -0.796808000 |
| C | 4.669094000  | -0.406682000 | -1.724074000 |
| C | 4.056529000  | 0.912040000  | -1.252879000 |
| C | 4.036743000  | 2.024361000  | -2.271756000 |
| C | 0.823128000  | -1.543225000 | -1.625077000 |
| C | -0.456507000 | -2.330836000 | -0.120498000 |
| C | 0.672380000  | -1.862713000 | 0.547659000  |
| C | -1.492586000 | -2.847858000 | 0.678450000  |
| C | -0.173085000 | -2.401141000 | 2.520198000  |
| O | 4.853651000  | -1.827937000 | 0.272398000  |
| O | 6.082057000  | -0.374587000 | -1.584083000 |
| O | 2.711968000  | 0.541160000  | -0.924385000 |
| H | 2.902643000  | -0.560480000 | 0.826133000  |
| H | 5.746655000  | -1.541161000 | 0.021403000  |
| H | 3.697348000  | -2.351457000 | -1.350436000 |
| H | 6.484469000  | -0.928046000 | -2.263363000 |
| H | 4.383303000  | -0.594013000 | -2.760846000 |
| H | 4.572584000  | 1.232834000  | -0.339533000 |
| H | 3.480499000  | 1.717900000  | -3.159576000 |
| H | 5.058627000  | 2.269745000  | -2.564180000 |
| H | -2.847091000 | -3.171159000 | -0.812795000 |
| H | -3.401847000 | -3.543949000 | 0.780592000  |
| H | 1.248499000  | -1.214289000 | -2.559185000 |
| H | -0.088690000 | -2.440372000 | 3.600759000  |
| H | -5.895251000 | -0.838309000 | -0.104203000 |
| H | -5.364643000 | -0.396564000 | -1.703994000 |
| H | -4.802460000 | 1.912369000  | -0.881075000 |
| H | -5.309773000 | 1.460051000  | 0.728046000  |
| H | -3.553776000 | -0.342622000 | 0.769200000  |

|   |              |              |              |
|---|--------------|--------------|--------------|
| H | -3.036935000 | 0.134066000  | -0.831700000 |
| H | -2.441378000 | 2.408848000  | 0.040800000  |
| H | -2.945736000 | 1.920286000  | 1.648789000  |
| H | -1.254772000 | 0.083657000  | 1.623542000  |
| H | -0.717920000 | 0.585518000  | 0.030916000  |
| H | -0.472216000 | 3.372007000  | -1.319338000 |
| H | 0.993892000  | 2.223793000  | -1.181490000 |
| H | 3.572175000  | 2.919540000  | -1.857957000 |
| H | 1.179429000  | 0.326064000  | 2.339200000  |
| H | -0.602608000 | 2.310122000  | 2.537546000  |
| H | -0.239578000 | 4.000486000  | 1.018167000  |
| H | 2.383477000  | 3.784831000  | 0.703775000  |
| O | -7.486377000 | 1.707270000  | -1.103823000 |
| O | -8.036135000 | -0.435480000 | -1.474800000 |
| C | -7.232126000 | 0.477418000  | -1.146351000 |
| C | -5.804006000 | 0.012622000  | -0.786571000 |
| C | -4.872948000 | 1.064311000  | -0.194638000 |
| C | -3.476548000 | 0.518869000  | 0.095990000  |
| C | -2.524971000 | 1.545969000  | 0.709056000  |
| C | -1.143777000 | 0.951775000  | 0.967841000  |
| C | 0.301692000  | 2.913762000  | -0.720382000 |
| O | 3.361234000  | 1.761841000  | 1.973330000  |
| C | 2.186533000  | 2.043663000  | 1.743841000  |
| N | 1.107135000  | 1.250440000  | 1.941249000  |
| C | -0.154550000 | 1.901895000  | 1.623496000  |
| C | 0.341630000  | 3.118261000  | 0.750223000  |
| N | 1.724825000  | 3.251215000  | 1.250789000  |

### 2A-RC-complex

|   |              |              |              |
|---|--------------|--------------|--------------|
| O | -0.746488000 | -0.642135000 | -4.303662000 |
| P | -1.440804000 | -0.504785000 | -2.890544000 |
| O | -1.002372000 | -1.832048000 | -2.126960000 |
| O | -0.571688000 | 0.666781000  | -2.288074000 |
| O | -2.901465000 | -0.296089000 | -2.895428000 |
| C | -1.703619000 | -2.290772000 | -0.952120000 |
| C | -1.135038000 | -1.644841000 | 0.295029000  |
| C | -1.864529000 | -2.053323000 | 1.577958000  |
| O | -1.284617000 | -0.199078000 | 0.189800000  |
| C | -1.869554000 | 0.307904000  | 1.389000000  |
| C | -2.761250000 | -0.834583000 | 1.870644000  |
| N | -2.502042000 | 1.566722000  | 1.138003000  |
| O | -0.904485000 | -2.218670000 | 2.611468000  |
| O | -3.043012000 | -0.669475000 | 3.246659000  |
| C | -3.560295000 | 1.870459000  | 0.292162000  |
| C | -3.783102000 | 3.212820000  | 0.464244000  |
| N | -2.900188000 | 3.735573000  | 1.392297000  |

|   |              |              |              |
|---|--------------|--------------|--------------|
| C | -2.146103000 | 2.736171000  | 1.765396000  |
| N | -4.225033000 | 0.896211000  | -0.446068000 |
| H | -1.299228000 | -1.084773000 | -4.961976000 |
| H | -0.641096000 | 0.657358000  | -1.309587000 |
| H | -2.769626000 | -2.085649000 | -1.059764000 |
| H | -1.546615000 | -3.366999000 | -0.907622000 |
| H | -0.071167000 | -1.867049000 | 0.375758000  |
| H | -2.449823000 | -2.967634000 | 1.445242000  |
| H | -1.095587000 | 0.495491000  | 2.134854000  |
| H | -3.669870000 | -0.872386000 | 1.270265000  |
| H | -1.360022000 | -2.055074000 | 3.450599000  |
| H | -3.889865000 | -1.082734000 | 3.449703000  |
| H | -4.528884000 | 3.817372000  | -0.025714000 |
| H | -1.318369000 | 2.769727000  | 2.454550000  |
| H | -3.659458000 | 0.453461000  | -1.168647000 |
| H | -5.057214000 | 1.276143000  | -0.876864000 |
| N | 2.412827000  | 0.270047000  | 0.258033000  |
| N | 1.045716000  | 1.764045000  | 1.225329000  |
| N | 1.443709000  | 3.386803000  | -2.084670000 |
| N | 2.702194000  | 1.349212000  | -1.911436000 |
| N | 0.094851000  | 4.222936000  | -0.395709000 |
| C | 3.201026000  | -0.928289000 | 0.061953000  |
| C | 4.356453000  | -1.112603000 | 1.063925000  |
| C | 3.844288000  | -2.241994000 | 1.977303000  |
| C | 2.977953000  | -3.072957000 | 1.006120000  |
| C | 1.957924000  | -3.923071000 | 1.640946000  |
| C | 1.690575000  | 0.636880000  | 1.372364000  |
| C | 1.347832000  | 2.173629000  | -0.061680000 |
| C | 2.204121000  | 1.260460000  | -0.676593000 |
| C | 0.943188000  | 3.274481000  | -0.841966000 |
| C | 2.275361000  | 2.443512000  | -2.537262000 |
| O | 5.499570000  | -1.536995000 | 0.342382000  |
| O | 4.886976000  | -3.039901000 | 2.504030000  |
| O | 2.347227000  | -2.062392000 | 0.192232000  |
| H | 3.604957000  | -0.863075000 | -0.948436000 |
| H | 5.991208000  | -2.134765000 | 0.926223000  |
| H | 4.562900000  | -0.189267000 | 1.611326000  |
| H | 5.166418000  | -2.680729000 | 3.354306000  |
| H | 3.215634000  | -1.833467000 | 2.771275000  |
| H | 3.662001000  | -3.671767000 | 0.392286000  |
| H | 1.045641000  | -3.477548000 | 2.013638000  |
| H | 2.176363000  | -4.959660000 | 1.850085000  |
| H | -0.467663000 | 4.049472000  | 0.422226000  |
| H | -0.260852000 | 4.886161000  | -1.064789000 |
| H | 1.663806000  | 0.017133000  | 2.254113000  |
| H | 2.643231000  | 2.590047000  | -3.547242000 |

**2A-PC-complex**

|   |              |              |              |
|---|--------------|--------------|--------------|
| O | 4.009434000  | -0.974523000 | 2.531472000  |
| P | 3.158109000  | -0.633769000 | 1.250373000  |
| O | 2.369028000  | 0.698922000  | 1.704233000  |
| O | 4.292581000  | -0.162321000 | 0.267245000  |
| O | 2.246806000  | -1.677940000 | 0.753283000  |
| C | 1.468281000  | 1.348354000  | 0.888713000  |
| C | 2.021916000  | 2.222947000  | -0.162182000 |
| C | 0.993346000  | 3.033411000  | -0.938423000 |
| O | 2.712305000  | 1.394271000  | -1.190642000 |
| C | 2.085182000  | 1.546631000  | -2.463578000 |
| C | 0.709577000  | 2.152805000  | -2.166695000 |
| N | 2.076008000  | 0.300788000  | -3.179004000 |
| O | 1.593797000  | 4.259655000  | -1.326457000 |
| O | 0.281181000  | 2.892451000  | -3.295241000 |
| C | 1.406398000  | -0.880793000 | -2.880892000 |
| C | 1.674948000  | -1.719516000 | -3.929996000 |
| N | 2.486082000  | -1.093444000 | -4.857853000 |
| C | 2.717472000  | 0.098870000  | -4.375965000 |
| N | 0.602844000  | -1.013622000 | -1.746264000 |
| H | 3.591709000  | -1.622925000 | 3.114905000  |
| H | 3.908191000  | 0.356769000  | -0.481238000 |
| H | 0.436943000  | 1.032708000  | 0.962103000  |
| H | 3.225269000  | 4.536976000  | 2.555755000  |
| H | 2.795018000  | 2.864229000  | 0.257102000  |
| H | 0.089587000  | 3.212632000  | -0.349339000 |
| H | 2.661792000  | 2.251321000  | -3.065434000 |
| H | 0.007186000  | 1.361833000  | -1.906472000 |
| H | 1.155568000  | 4.543401000  | -2.142326000 |
| H | -0.682439000 | 2.914310000  | -3.313477000 |
| H | 1.326029000  | -2.731427000 | -4.059155000 |
| H | 3.334342000  | 0.861197000  | -4.824348000 |
| H | 1.137860000  | -1.113448000 | -0.885147000 |
| H | -0.005630000 | -1.816883000 | -1.834297000 |
| N | 5.760503000  | 2.666652000  | -0.997283000 |
| N | 4.922921000  | 3.413023000  | -2.941084000 |
| N | 6.846502000  | 0.516139000  | -4.213520000 |
| N | 7.035761000  | 0.756435000  | -1.829284000 |
| N | 5.591220000  | 1.939757000  | -5.551927000 |
| C | 6.065705000  | 2.584149000  | 0.428031000  |
| C | 7.244078000  | 3.472799000  | 0.851418000  |
| C | 6.528454000  | 4.721205000  | 1.399184000  |
| C | 5.269315000  | 4.123374000  | 2.024471000  |
| C | 4.085854000  | 5.055262000  | 2.132007000  |
| C | 4.977680000  | 3.594928000  | -1.645573000 |

|   |             |              |              |
|---|-------------|--------------|--------------|
| C | 5.711122000 | 2.301343000  | -3.167317000 |
| C | 6.239046000 | 1.820290000  | -1.970266000 |
| C | 6.053825000 | 1.594197000  | -4.333271000 |
| C | 7.280783000 | 0.165596000  | -2.996884000 |
| O | 7.945588000 | 2.806978000  | 1.887283000  |
| O | 7.281156000 | 5.402574000  | 2.388756000  |
| O | 4.934224000 | 3.021550000  | 1.155648000  |
| H | 6.282099000 | 1.537732000  | 0.639697000  |
| H | 8.271517000 | 3.492405000  | 2.489962000  |
| H | 7.904100000 | 3.692106000  | 0.008304000  |
| H | 7.864643000 | 6.041350000  | 1.962256000  |
| H | 6.261667000 | 5.390509000  | 0.576932000  |
| H | 5.533434000 | 3.727853000  | 3.010996000  |
| H | 3.810035000 | 5.447532000  | 1.151672000  |
| H | 4.339024000 | 5.891986000  | 2.784685000  |
| H | 5.129231000 | 2.824297000  | -5.677073000 |
| H | 5.961641000 | 1.475834000  | -6.364504000 |
| H | 4.441578000 | 4.355249000  | -1.104129000 |
| H | 7.916860000 | -0.712449000 | -2.963521000 |

### **2B-RC-complex**

|   |              |              |              |
|---|--------------|--------------|--------------|
| O | 0.441288000  | 0.722233000  | -3.797166000 |
| P | 1.213406000  | -0.676996000 | -3.443601000 |
| O | 0.478349000  | -1.146489000 | -2.069772000 |
| O | 0.832473000  | -1.681870000 | -4.471179000 |
| O | 2.647038000  | -0.345558000 | -3.150642000 |
| C | 0.612137000  | -0.359600000 | -0.889781000 |
| C | 0.859098000  | -1.271940000 | 0.293624000  |
| C | 0.916924000  | -0.521143000 | 1.624447000  |
| O | 2.137952000  | -1.939003000 | 0.137951000  |
| C | 2.966103000  | -1.664176000 | 1.251616000  |
| C | 2.427507000  | -0.360936000 | 1.848317000  |
| N | 4.349686000  | -1.633248000 | 0.852569000  |
| O | 0.346563000  | -1.330982000 | 2.650193000  |
| O | 2.790715000  | -0.282249000 | 3.216848000  |
| C | 4.969572000  | -0.793933000 | -0.061152000 |
| C | 6.303491000  | -1.109467000 | 0.009297000  |
| N | 6.516560000  | -2.113773000 | 0.935565000  |
| C | 5.335053000  | -2.410122000 | 1.409016000  |
| N | 4.271556000  | 0.177721000  | -0.772264000 |
| H | 0.954585000  | 1.479347000  | -3.491610000 |
| H | 1.434299000  | 0.352753000  | -0.984592000 |
| H | -0.310552000 | 0.200736000  | -0.728935000 |
| H | 0.079349000  | -2.032699000 | 0.330670000  |
| H | 0.399471000  | 0.440011000  | 1.578207000  |



|   |              |              |              |
|---|--------------|--------------|--------------|
| H | 2.884287000  | -2.453916000 | 2.006168000  |
| H | 2.806950000  | 0.487291000  | 1.278641000  |
| H | 0.854272000  | -1.156036000 | 3.457124000  |
| H | 2.782844000  | 0.641512000  | 3.493332000  |
| H | 7.107671000  | -0.667906000 | -0.557144000 |
| H | 5.107602000  | -3.167320000 | 2.142555000  |
| H | 3.605572000  | -0.187586000 | -1.458980000 |
| H | 4.913435000  | 0.792040000  | -1.255489000 |
| N | -2.788249000 | 0.501849000  | 0.254064000  |
| N | -2.575804000 | -1.720913000 | 0.031951000  |
| N | -3.132456000 | -0.836824000 | -3.520159000 |
| N | -3.185777000 | 1.089957000  | -2.084627000 |
| N | -2.781888000 | -2.998948000 | -2.753779000 |
| C | -2.780607000 | 1.823821000  | 0.863261000  |
| C | -4.027204000 | 2.132435000  | 1.702572000  |
| C | -3.550844000 | 1.821828000  | 3.131844000  |
| C | -2.066871000 | 2.252112000  | 3.076229000  |
| C | -1.181283000 | 1.588465000  | 4.046969000  |
| C | -2.558503000 | -0.711824000 | 0.864683000  |
| C | -2.828918000 | -1.150494000 | -1.200402000 |
| C | -2.964427000 | 0.230554000  | -1.085260000 |
| C | -2.906855000 | -1.682558000 | -2.500652000 |
| C | -3.256757000 | 0.469504000  | -3.260392000 |
| O | -4.314283000 | 3.512529000  | 1.563713000  |
| O | -4.228566000 | 2.575416000  | 4.118460000  |
| O | -1.661119000 | 1.919170000  | 1.729664000  |
| H | -2.697377000 | 2.537341000  | 0.043529000  |
| H | -4.692634000 | 3.807139000  | 2.405859000  |
| H | -4.879012000 | 1.519064000  | 1.397161000  |
| H | -5.013967000 | 2.093943000  | 4.404398000  |
| H | -3.625429000 | 0.750563000  | 3.330748000  |
| H | -2.043610000 | 3.340481000  | 3.204218000  |
| H | -0.820589000 | 0.590327000  | 3.840187000  |
| H | -1.000085000 | 2.037366000  | 5.012017000  |
| H | -2.464366000 | -3.616336000 | -2.026281000 |
| H | -2.696454000 | -3.305029000 | -3.708562000 |
| H | -2.338357000 | -0.781140000 | 1.917000000  |
| H | -3.433643000 | 1.102328000  | -4.123489000 |

### **2B-PC-complex**

|   |             |              |              |
|---|-------------|--------------|--------------|
| O | 4.619576000 | 0.715005000  | 1.464297000  |
| P | 3.888297000 | -0.301769000 | 0.423635000  |
| O | 3.084485000 | 0.761523000  | -0.573726000 |
| O | 4.938355000 | -0.908459000 | -0.429577000 |
| O | 2.856710000 | -1.098768000 | 1.151218000  |
| C | 2.027017000 | 1.475203000  | -0.109075000 |

|   |              |              |              |
|---|--------------|--------------|--------------|
| C | 1.056340000  | 1.919961000  | -1.120572000 |
| C | 0.023417000  | 2.899019000  | -0.574160000 |
| O | 0.264548000  | 0.762580000  | -1.620059000 |
| C | -1.090150000 | 0.906509000  | -1.244271000 |
| C | -1.117298000 | 1.969791000  | -0.140003000 |
| N | -1.652508000 | -0.371278000 | -0.874691000 |
| O | -0.403203000 | 3.752682000  | -1.631392000 |
| O | -2.388166000 | 2.597722000  | -0.120356000 |
| C | -1.260547000 | -1.231510000 | 0.138242000  |
| C | -2.147160000 | -2.278225000 | 0.087880000  |
| N | -3.067177000 | -2.083486000 | -0.925737000 |
| C | -2.737330000 | -0.949584000 | -1.485687000 |
| N | -0.228856000 | -0.928639000 | 1.021344000  |
| H | 4.072699000  | 0.880230000  | 2.241897000  |
| H | 1.753726000  | 1.361510000  | 0.932968000  |
| H | 3.708146000  | 3.993785000  | 2.722129000  |
| H | 1.571696000  | 2.337009000  | -1.985294000 |
| H | 0.425196000  | 3.485602000  | 0.255394000  |
| H | -1.689167000 | 1.267725000  | -2.086153000 |
| H | -0.880543000 | 1.510095000  | 0.820118000  |
| H | -1.289880000 | 4.066248000  | -1.401728000 |
| H | -2.550623000 | 2.953615000  | 0.760660000  |
| H | -2.165668000 | -3.147848000 | 0.724886000  |
| H | -3.220379000 | -0.484721000 | -2.330449000 |
| H | 0.686964000  | -0.800552000 | 0.599396000  |
| H | -0.147272000 | -1.632564000 | 1.742100000  |
| N | 2.286917000  | 6.954083000  | -0.697649000 |
| N | 2.355330000  | 9.033104000  | 0.145421000  |
| N | 0.683858000  | 9.762084000  | -3.079648000 |
| N | 1.190973000  | 7.425984000  | -2.826235000 |
| N | 1.206234000  | 11.369886000 | -1.491059000 |
| C | 2.482294000  | 5.509122000  | -0.828776000 |
| C | 3.750202000  | 5.152668000  | -1.617812000 |
| C | 4.768085000  | 4.902765000  | -0.490881000 |
| C | 3.897889000  | 4.285678000  | 0.600702000  |
| C | 4.406358000  | 4.439827000  | 2.013133000  |
| C | 2.656420000  | 7.772869000  | 0.343070000  |
| C | 1.756550000  | 9.051226000  | -1.098723000 |
| C | 1.704281000  | 7.767465000  | -1.638555000 |
| C | 1.209426000  | 10.083552000 | -1.884240000 |
| C | 0.704156000  | 8.482747000  | -3.472489000 |
| O | 3.504117000  | 3.961304000  | -2.344238000 |
| O | 5.788115000  | 3.987311000  | -0.858627000 |
| O | 2.623663000  | 4.956260000  | 0.463099000  |
| H | 1.598916000  | 5.112533000  | -1.329545000 |
| H | 4.309596000  | 3.424970000  | -2.289310000 |

|   |             |              |              |
|---|-------------|--------------|--------------|
| H | 4.044532000 | 5.962735000  | -2.289701000 |
| H | 6.496315000 | 4.464307000  | -1.307394000 |
| H | 5.193055000 | 5.852407000  | -0.154623000 |
| H | 3.758635000 | 3.226951000  | 0.367225000  |
| H | 4.545593000 | 5.491576000  | 2.269661000  |
| H | 5.363955000 | 3.925939000  | 2.109312000  |
| H | 1.524317000 | 11.620939000 | -0.571591000 |
| H | 0.740262000 | 12.061886000 | -2.052510000 |
| H | 3.124379000 | 7.370943000  | 1.225315000  |
| H | 0.265236000 | 8.286935000  | -4.445411000 |

### **2C-RC-complex**

|   |              |              |              |
|---|--------------|--------------|--------------|
| O | 4.206535000  | 3.510613000  | -1.430905000 |
| P | 3.148050000  | 2.564073000  | -1.981226000 |
| O | 2.032624000  | 2.348585000  | -0.731862000 |
| O | 2.274821000  | 3.134796000  | -3.084431000 |
| O | 3.687311000  | 1.157494000  | -2.269002000 |
| C | 2.484353000  | 1.760206000  | 0.466273000  |
| C | 1.415192000  | 0.830792000  | 1.013604000  |
| C | 1.822375000  | 0.140487000  | 2.311192000  |
| O | 1.137863000  | -0.233415000 | 0.063937000  |
| C | 1.456782000  | -1.492650000 | 0.623496000  |
| C | 2.374630000  | -1.202982000 | 1.813186000  |
| N | 2.000176000  | -2.375633000 | -0.380913000 |
| O | 0.667499000  | -0.061057000 | 3.124197000  |
| O | 2.258869000  | -2.252121000 | 2.764454000  |
| C | 3.195910000  | -2.287882000 | -1.082513000 |
| C | 3.241942000  | -3.427051000 | -1.849223000 |
| N | 2.114950000  | -4.201351000 | -1.643380000 |
| C | 1.392888000  | -3.541194000 | -0.775378000 |
| N | 4.101636000  | -1.248621000 | -0.895446000 |
| H | 3.410477000  | 1.200393000  | 0.307246000  |
| H | 2.683821000  | 2.531334000  | 1.223768000  |
| H | 0.489330000  | 1.385821000  | 1.155052000  |
| H | 2.574756000  | 0.712081000  | 2.862562000  |
| H | 0.553274000  | -1.984140000 | 0.993523000  |
| H | 3.401136000  | -1.083178000 | 1.468985000  |
| H | 0.827097000  | -0.862492000 | 3.644142000  |
| H | 3.069677000  | -2.296542000 | 3.283623000  |
| H | 4.025197000  | -3.719705000 | -2.530423000 |
| H | 0.425539000  | -3.831083000 | -0.397235000 |
| H | 3.807032000  | -0.338918000 | -1.300993000 |
| H | 4.990807000  | -1.490629000 | -1.313934000 |
| N | -2.389057000 | 0.042285000  | 0.127229000  |
| N | -1.905454000 | -1.939950000 | 1.060030000  |
| N | -2.866305000 | -3.108470000 | -2.319552000 |

|   |              |              |              |
|---|--------------|--------------|--------------|
| N | -3.030905000 | -0.720040000 | -2.102585000 |
| N | -2.175509000 | -4.510232000 | -0.600727000 |
| C | -2.625978000 | 1.478395000  | -0.007662000 |
| C | -4.021917000 | 1.890293000  | 0.469834000  |
| C | -3.760226000 | 2.252024000  | 1.941924000  |
| C | -2.351156000 | 2.887690000  | 1.868518000  |
| C | -1.543075000 | 2.800233000  | 3.097310000  |
| C | -1.961198000 | -0.643738000 | 1.240502000  |
| C | -2.312717000 | -2.125046000 | -0.246716000 |
| C | -2.615286000 | -0.902988000 | -0.845281000 |
| C | -2.457984000 | -3.269647000 | -1.049458000 |
| C | -3.121964000 | -1.872001000 | -2.764017000 |
| O | -4.416050000 | 3.035401000  | -0.263185000 |
| O | -4.679884000 | 3.197110000  | 2.454165000  |
| O | -1.698124000 | 2.182417000  | 0.789215000  |
| H | -2.489828000 | 1.723585000  | -1.060668000 |
| H | -4.963423000 | 3.574103000  | 0.327605000  |
| H | -4.744077000 | 1.077383000  | 0.354798000  |
| H | -5.438885000 | 2.732411000  | 2.826048000  |
| H | -3.739148000 | 1.348203000  | 2.553969000  |
| H | -2.495107000 | 3.934152000  | 1.573233000  |
| H | -0.903856000 | 1.944802000  | 3.269179000  |
| H | -1.669739000 | 3.542430000  | 3.871765000  |
| H | -2.036761000 | -4.662595000 | 0.383664000  |
| H | -2.415694000 | -5.301548000 | -1.174166000 |
| H | -1.650045000 | -0.131476000 | 2.134614000  |
| H | -3.447817000 | -1.805325000 | -3.796573000 |

### 2C-PC-complex

|   |              |              |              |
|---|--------------|--------------|--------------|
| O | 2.936813000  | -2.016085000 | -0.425806000 |
| P | 2.880920000  | -0.871113000 | -1.417751000 |
| O | 2.998398000  | 0.562322000  | -0.443185000 |
| O | 4.087069000  | -0.708246000 | -2.316018000 |
| O | 1.530859000  | -0.696742000 | -2.107668000 |
| C | 2.100384000  | 0.770397000  | 0.533426000  |
| C | 1.674454000  | 2.167302000  | 0.738965000  |
| C | 0.768195000  | 2.369271000  | 1.946102000  |
| O | 0.864728000  | 2.652817000  | -0.422490000 |
| C | -0.468012000 | 2.879287000  | -0.026262000 |
| C | -0.633876000 | 2.211867000  | 1.342928000  |
| N | -1.397517000 | 2.431425000  | -1.042037000 |
| O | 0.948968000  | 3.686060000  | 2.461301000  |
| O | -1.646947000 | 2.889410000  | 2.075151000  |
| C | -1.652231000 | 1.146518000  | -1.501054000 |
| C | -2.664066000 | 1.290207000  | -2.419542000 |
| N | -3.029399000 | 2.617970000  | -2.539947000 |

|   |              |              |              |
|---|--------------|--------------|--------------|
| C | -2.247623000 | 3.269527000  | -1.717235000 |
| N | -1.003731000 | 0.023238000  | -0.994568000 |
| H | 1.445568000  | -0.052871000 | 0.802582000  |
| H | 4.845478000  | 3.075545000  | 2.122236000  |
| H | 2.532569000  | 2.835032000  | 0.771701000  |
| H | 0.962293000  | 1.627790000  | 2.726201000  |
| H | -0.650877000 | 3.951241000  | 0.088258000  |
| H | -0.868760000 | 1.155457000  | 1.215539000  |
| H | 0.102859000  | 3.952661000  | 2.849447000  |
| H | -2.012690000 | 2.288460000  | 2.734134000  |
| H | -3.138751000 | 0.507999000  | -2.990476000 |
| H | -2.228059000 | 4.337366000  | -1.566444000 |
| H | -0.015566000 | -0.071141000 | -1.283544000 |
| H | -1.484061000 | -0.814196000 | -1.298385000 |
| N | 2.477436000  | 5.621641000  | -1.097242000 |
| N | 0.453325000  | 6.119378000  | -0.266264000 |
| N | -0.252179000 | 6.650077000  | -3.861758000 |
| N | 2.022920000  | 5.978646000  | -3.471414000 |
| N | -1.820951000 | 6.915302000  | -2.168428000 |
| C | 3.894160000  | 5.275717000  | -1.149206000 |
| C | 4.814919000  | 6.462708000  | -0.832235000 |
| C | 5.106193000  | 6.252065000  | 0.664291000  |
| C | 5.141855000  | 4.728377000  | 0.775079000  |
| C | 4.810239000  | 4.165290000  | 2.137455000  |
| C | 1.672920000  | 5.733407000  | 0.013610000  |
| C | 0.442703000  | 6.261237000  | -1.639942000 |
| C | 1.692097000  | 5.953041000  | -2.176271000 |
| C | -0.560546000 | 6.624912000  | -2.554061000 |
| C | 0.992739000  | 6.331709000  | -4.237242000 |
| O | 6.001257000  | 6.316785000  | -1.593778000 |
| O | 6.353400000  | 6.793314000  | 1.068076000  |
| O | 4.163526000  | 4.277491000  | -0.185185000 |
| H | 4.087440000  | 4.906226000  | -2.156494000 |
| H | 6.726571000  | 6.655620000  | -1.047924000 |
| H | 4.326792000  | 7.417290000  | -1.044943000 |
| H | 6.233961000  | 7.718493000  | 1.313081000  |
| H | 4.289130000  | 6.658753000  | 1.266005000  |
| H | 6.132515000  | 4.388799000  | 0.454302000  |
| H | 3.813284000  | 4.474442000  | 2.455350000  |
| H | 5.540385000  | 4.522492000  | 2.865490000  |
| H | -2.018763000 | 7.063475000  | -1.193474000 |
| H | -2.461789000 | 7.294247000  | -2.845516000 |
| H | 2.022293000  | 5.463598000  | 0.995268000  |
| H | 1.182397000  | 6.369787000  | -5.304682000 |

### 3-RC-complex

|   |              |              |              |
|---|--------------|--------------|--------------|
| N | 0.726871000  | -1.994846000 | 1.255077000  |
| N | 2.108724000  | -1.749508000 | 3.005419000  |
| N | 4.615412000  | -1.776430000 | 0.276662000  |
| N | 2.370603000  | -2.011296000 | -0.548046000 |
| N | 5.146383000  | -1.597798000 | 2.526048000  |
| C | -0.494556000 | -2.180640000 | 0.483425000  |
| C | -0.868582000 | -3.654509000 | 0.243594000  |
| C | -2.012515000 | -3.876480000 | 1.250810000  |
| C | -2.681112000 | -2.484428000 | 1.278999000  |
| C | -3.481143000 | -2.179436000 | 2.475029000  |
| C | 0.862731000  | -1.876116000 | 2.619636000  |
| C | 2.840478000  | -1.793095000 | 1.833669000  |
| C | 1.998111000  | -1.942355000 | 0.733852000  |
| C | 4.219237000  | -1.714959000 | 1.559543000  |
| C | 3.691606000  | -1.912079000 | -0.680727000 |
| O | -1.344308000 | -3.775459000 | -1.085009000 |
| O | -2.941700000 | -4.853793000 | 0.823713000  |
| O | -1.557821000 | -1.585718000 | 1.197958000  |
| H | -0.338251000 | -1.688444000 | -0.478250000 |
| H | -2.029110000 | -4.461333000 | -1.075841000 |
| H | -0.017422000 | -4.317668000 | 0.418533000  |
| H | -2.673913000 | -5.717889000 | 1.158125000  |
| H | -1.607421000 | -4.110842000 | 2.237542000  |
| H | -3.291476000 | -2.396362000 | 0.371650000  |
| H | -2.987450000 | -1.858846000 | 3.381843000  |
| H | -4.541677000 | -2.379757000 | 2.485069000  |
| H | 4.869828000  | -1.471608000 | 3.483702000  |
| H | 6.109460000  | -1.452858000 | 2.275380000  |
| H | 0.000672000  | -1.869423000 | 3.264461000  |
| H | 4.073137000  | -1.948091000 | -1.695460000 |
| H | -4.408879000 | 1.408822000  | -1.457094000 |
| H | 5.033295000  | 1.531787000  | 1.247511000  |
| H | 1.570162000  | 2.621503000  | 1.770661000  |
| H | 1.575230000  | 0.895674000  | 1.996886000  |
| H | 0.765607000  | 0.570771000  | -0.350450000 |
| H | 0.737696000  | 2.299651000  | -0.589051000 |
| H | -0.965005000 | 2.559699000  | 1.202846000  |
| H | -0.862219000 | 0.848847000  | 1.576846000  |
| H | -1.667057000 | 0.300008000  | -0.729554000 |
| H | -1.876024000 | 2.010178000  | -1.056261000 |
| H | -3.554633000 | 2.171124000  | 0.770931000  |
| H | -3.248211000 | 0.501243000  | 1.217670000  |
| O | 3.363154000  | 1.601969000  | -0.507555000 |
| C | -5.736578000 | 0.601337000  | 0.042146000  |
| C | -4.359024000 | 0.720003000  | -0.606806000 |
| C | 3.110823000  | 1.618473000  | 0.697877000  |

|   |              |              |              |
|---|--------------|--------------|--------------|
| C | 1.692814000  | 1.672810000  | 1.236288000  |
| C | 0.617635000  | 1.521719000  | 0.168557000  |
| C | -0.789911000 | 1.572467000  | 0.760069000  |
| C | -1.887026000 | 1.261721000  | -0.255448000 |
| C | -3.279605000 | 1.189722000  | 0.366789000  |
| H | -4.065802000 | -0.252139000 | -1.018417000 |
| H | -6.489773000 | 0.260495000  | -0.671533000 |
| H | -5.714321000 | -0.111007000 | 0.871282000  |
| H | -6.066243000 | 1.564012000  | 0.441917000  |
| N | 4.099006000  | 1.596898000  | 1.620735000  |
| C | 3.935952000  | 1.603465000  | 3.065523000  |
| H | 3.406101000  | 2.495317000  | 3.404581000  |
| H | 3.394100000  | 0.722556000  | 3.415271000  |
| H | 4.923452000  | 1.599615000  | 3.520226000  |

### 3-PC-complex

|   |              |              |              |
|---|--------------|--------------|--------------|
| N | 0.882392000  | -2.104591000 | 1.164254000  |
| N | 2.172440000  | -1.752872000 | 2.966171000  |
| N | 4.810315000  | -1.843491000 | 0.366218000  |
| N | 2.614586000  | -2.171703000 | -0.554163000 |
| N | 5.221125000  | -1.521409000 | 2.623937000  |
| C | -0.301690000 | -2.343305000 | 0.351476000  |
| C | -0.742428000 | -3.818979000 | 0.296184000  |
| C | -1.954023000 | -3.836543000 | 1.248763000  |
| C | -2.535123000 | -2.438081000 | 1.052993000  |
| C | -3.386880000 | -1.909149000 | 2.180707000  |
| C | 0.949701000  | -1.922338000 | 2.526806000  |
| C | 2.960977000  | -1.831976000 | 1.833862000  |
| C | 2.176633000  | -2.049879000 | 0.702974000  |
| C | 4.349049000  | -1.729933000 | 1.623551000  |
| C | 3.937866000  | -2.048484000 | -0.627078000 |
| O | -1.148821000 | -4.110078000 | -1.030340000 |
| O | -2.915040000 | -4.819914000 | 0.901628000  |
| O | -1.370035000 | -1.607521000 | 0.911841000  |
| H | -0.063538000 | -1.997820000 | -0.656316000 |
| H | -1.891636000 | -4.729386000 | -0.963996000 |
| H | 0.061091000  | -4.488421000 | 0.613680000  |
| H | -2.697503000 | -5.648917000 | 1.344211000  |
| H | -1.616879000 | -3.959567000 | 2.281184000  |
| H | -3.100786000 | -2.430557000 | 0.113708000  |
| H | -2.831929000 | -1.919588000 | 3.120387000  |
| H | -4.277224000 | -2.529660000 | 2.289947000  |
| H | 4.903882000  | -1.445255000 | 3.574293000  |
| H | 6.204789000  | -1.456557000 | 2.427488000  |
| H | 0.058147000  | -1.900918000 | 3.130077000  |
| H | 4.370754000  | -2.127408000 | -1.618694000 |

|   |              |              |              |
|---|--------------|--------------|--------------|
| H | -4.644904000 | 1.142950000  | -1.491152000 |
| H | 4.918514000  | 1.441523000  | 1.284707000  |
| H | 1.465149000  | 2.565687000  | 1.745267000  |
| H | 1.441664000  | 0.844338000  | 2.004061000  |
| H | 0.629392000  | 0.478604000  | -0.328705000 |
| H | 0.679888000  | 2.197632000  | -0.632112000 |
| H | -1.030586000 | 2.590020000  | 1.136814000  |
| H | -1.030893000 | 0.877294000  | 1.532288000  |
| H | -1.828700000 | 0.334239000  | -0.767634000 |
| H | -1.845371000 | 2.038427000  | -1.169677000 |
| H | -3.585200000 | 2.163262000  | 0.960040000  |
| H | -3.699499000 | -0.886589000 | 1.968767000  |
| O | 3.268053000  | 1.436483000  | -0.489216000 |
| C | -5.829456000 | 0.830187000  | 0.284558000  |
| C | -4.506505000 | 0.734898000  | -0.475195000 |
| C | 3.003386000  | 1.518390000  | 0.710698000  |
| C | 1.579372000  | 1.605325000  | 1.230304000  |
| C | 0.515669000  | 1.454350000  | 0.151617000  |
| C | -0.898041000 | 1.587954000  | 0.713261000  |
| C | -1.982803000 | 1.328718000  | -0.334648000 |
| C | -3.370061000 | 1.424106000  | 0.193738000  |
| H | -4.246223000 | -0.319771000 | -0.638966000 |
| H | -6.631322000 | 0.316547000  | -0.249296000 |
| H | -5.743576000 | 0.380357000  | 1.276306000  |
| H | -6.127773000 | 1.872740000  | 0.417402000  |
| N | 3.982023000  | 1.547007000  | 1.643689000  |
| C | 3.803776000  | 1.600130000  | 3.085589000  |
| H | 3.250161000  | 2.491549000  | 3.385927000  |
| H | 3.279220000  | 0.719335000  | 3.460884000  |
| H | 4.786323000  | 1.636959000  | 3.549138000  |

#### **4-RC-complex**

|   |              |              |              |
|---|--------------|--------------|--------------|
| C | 2.067873000  | 1.911480000  | -1.638593000 |
| C | 0.619802000  | 1.730555000  | -1.254563000 |
| O | -0.305618000 | 2.054231000  | -1.998807000 |
| N | 0.390872000  | 1.215774000  | -0.026670000 |
| C | -0.946488000 | 1.041692000  | 0.504752000  |
| C | -1.864543000 | 0.112743000  | -0.296686000 |
| O | -3.019991000 | 0.458320000  | -0.538065000 |
| H | 2.731383000  | 1.219255000  | -1.121205000 |
| H | -1.464672000 | 1.997204000  | 0.559068000  |
| H | -0.855003000 | 0.649888000  | 1.518427000  |
| N | -1.387774000 | -1.087495000 | -0.680907000 |
| H | -2.041301000 | -1.637619000 | -1.218158000 |
| H | 1.175569000  | 0.954783000  | 0.545624000  |
| H | 2.358446000  | 2.931443000  | -1.381458000 |



|   |              |              |              |
|---|--------------|--------------|--------------|
| H | 2.170266000  | 1.785614000  | -2.714103000 |
| C | -0.105566000 | -1.700970000 | -0.364203000 |
| H | 0.681649000  | -1.386777000 | -1.051230000 |
| H | 0.201361000  | -1.463699000 | 0.653098000  |
| H | -0.219624000 | -2.780883000 | -0.433897000 |
| N | 1.882828000  | 5.655731000  | -2.926618000 |
| N | 1.240352000  | 4.575375000  | -4.784330000 |
| N | 3.899941000  | 6.709565000  | -6.235371000 |
| N | 3.636410000  | 7.064429000  | -3.872649000 |
| N | 2.620199000  | 5.211784000  | -7.459824000 |
| C | 1.952239000  | 6.087518000  | -1.528751000 |
| C | 1.270023000  | 7.440373000  | -1.306097000 |
| C | -0.147086000 | 7.013329000  | -0.891180000 |
| C | 0.135576000  | 5.737562000  | -0.065426000 |
| C | -0.971212000 | 4.771506000  | 0.009954000  |
| C | 1.046458000  | 4.721759000  | -3.495874000 |
| C | 2.256977000  | 5.460298000  | -5.085567000 |
| C | 2.671996000  | 6.139351000  | -3.942328000 |
| C | 2.924450000  | 5.784241000  | -6.282009000 |
| C | 4.193553000  | 7.282020000  | -5.062109000 |
| O | 1.929756000  | 8.093860000  | -0.237324000 |
| O | -0.799931000 | 7.968967000  | -0.077694000 |
| O | 1.281698000  | 5.143791000  | -0.722962000 |
| H | 3.006887000  | 6.142335000  | -1.256210000 |
| H | 1.261843000  | 8.620877000  | 0.226173000  |
| H | 1.281831000  | 8.051906000  | -2.211754000 |
| H | -1.272135000 | 8.595358000  | -0.638932000 |
| H | -0.739937000 | 6.767523000  | -1.774903000 |
| H | 0.433452000  | 6.067846000  | 0.936664000  |
| H | -1.101528000 | 4.039206000  | -0.773946000 |
| H | -1.717115000 | 4.871586000  | 0.784524000  |
| H | 1.919602000  | 4.493658000  | -7.513178000 |
| H | 3.145696000  | 5.448634000  | -8.283610000 |
| H | 0.347589000  | 4.155421000  | -2.902814000 |
| H | 4.989205000  | 8.019158000  | -5.089066000 |

#### **4-PC-complex**

|   |              |             |              |
|---|--------------|-------------|--------------|
| C | 2.273429000  | 1.979657000 | -2.905566000 |
| C | 1.042047000  | 1.839044000 | -2.047675000 |
| O | -0.075515000 | 1.672473000 | -2.508267000 |
| N | 1.275754000  | 1.875264000 | -0.686396000 |
| C | 0.340193000  | 1.770056000 | 0.312392000  |
| C | -0.905787000 | 1.008967000 | 0.292594000  |
| O | -1.891105000 | 1.484573000 | 0.885800000  |
| H | 2.689486000  | 0.985927000 | -3.087877000 |
| H | -1.999733000 | 3.894698000 | 0.175985000  |

|   |              |              |              |
|---|--------------|--------------|--------------|
| H | 0.516477000  | 2.371025000  | 1.191518000  |
| N | -0.969748000 | -0.207376000 | -0.296729000 |
| H | -1.889864000 | -0.620094000 | -0.282658000 |
| H | 2.178061000  | 2.230661000  | -0.404743000 |
| H | 3.047843000  | 2.588890000  | -2.439946000 |
| H | 1.989931000  | 2.414062000  | -3.860815000 |
| C | 0.114833000  | -1.004434000 | -0.843182000 |
| H | 0.255840000  | -0.825763000 | -1.910464000 |
| H | 1.045904000  | -0.786640000 | -0.323694000 |
| H | -0.117427000 | -2.057519000 | -0.692710000 |
| N | 1.433518000  | 5.358565000  | -2.711948000 |
| N | 0.836249000  | 4.814691000  | -4.805531000 |
| N | 4.431691000  | 5.499416000  | -5.381442000 |
| N | 3.800556000  | 5.823984000  | -3.084747000 |
| N | 2.947129000  | 4.847962000  | -7.040404000 |
| C | 1.333179000  | 5.645340000  | -1.282362000 |
| C | 0.927847000  | 7.095854000  | -0.983642000 |
| C | -0.590106000 | 6.964069000  | -0.764635000 |
| C | -0.704872000 | 5.590154000  | -0.105480000 |
| C | -2.028267000 | 4.884574000  | -0.280517000 |
| C | 0.432206000  | 4.961604000  | -3.568423000 |
| C | 2.179525000  | 5.136019000  | -4.769733000 |
| C | 2.569991000  | 5.476294000  | -3.476533000 |
| C | 3.185978000  | 5.154785000  | -5.753991000 |
| C | 4.662165000  | 5.806180000  | -4.099680000 |
| O | 1.570880000  | 7.494368000  | 0.214832000  |
| O | -1.113639000 | 7.959603000  | 0.099277000  |
| O | 0.339864000  | 4.812054000  | -0.726711000 |
| H | 2.312087000  | 5.431551000  | -0.851363000 |
| H | 0.956018000  | 8.081985000  | 0.679599000  |
| H | 1.186755000  | 7.764143000  | -1.808864000 |
| H | -1.349971000 | 8.738031000  | -0.418889000 |
| H | -1.108055000 | 6.967850000  | -1.727610000 |
| H | -0.472949000 | 5.703407000  | 0.959167000  |
| H | -2.270072000 | 4.775542000  | -1.339608000 |
| H | -2.816713000 | 5.469066000  | 0.197046000  |
| H | 2.034837000  | 4.544619000  | -7.332420000 |
| H | 3.705220000  | 4.830529000  | -7.700760000 |
| H | -0.563121000 | 4.766503000  | -3.208117000 |
| H | 5.686044000  | 6.074177000  | -3.861189000 |

### 5-RC-complex

|   |          |           |           |
|---|----------|-----------|-----------|
| N | 0.515608 | 1.215290  | 0.574767  |
| N | 1.956065 | 1.094464  | -1.139056 |
| N | 3.659346 | -1.201118 | 1.218018  |
| N | 1.632545 | -0.292042 | 2.136652  |

|   |           |           |           |
|---|-----------|-----------|-----------|
| N | 4.458471  | -0.676358 | -0.896431 |
| C | -0.610124 | 1.625153  | 1.413244  |
| C | -0.257080 | 2.804472  | 2.344859  |
| C | -0.697269 | 3.987345  | 1.476539  |
| C | -1.995290 | 3.446642  | 0.841458  |
| C | -2.416717 | 4.099304  | -0.407836 |
| C | 0.841475  | 1.629986  | -0.699205 |
| C | 2.393343  | 0.291956  | -0.104694 |
| C | 1.511236  | 0.354680  | 0.971219  |
| C | 3.519126  | -0.536944 | 0.056473  |
| C | 2.730061  | -1.045068 | 2.168249  |
| O | -1.046653 | 2.779865  | 3.519235  |
| O | -0.953148 | 5.201116  | 2.142910  |
| O | -1.676566 | 2.050504  | 0.593912  |
| H | -0.901467 | 0.751828  | 1.999032  |
| H | -0.718164 | 2.082214  | 4.098484  |
| H | 0.810284  | 2.823917  | 2.577278  |
| H | -0.125266 | 5.547918  | 2.496616  |
| H | 0.049837  | 4.118191  | 0.686681  |
| H | -2.780861 | 3.505301  | 1.602353  |
| H | -1.890565 | 3.881884  | -1.328446 |
| H | -3.138663 | 4.901976  | -0.375437 |
| H | 4.341357  | -0.239419 | -1.793636 |
| H | 5.214537  | -1.325571 | -0.762739 |
| H | 0.228847  | 2.317272  | -1.267568 |
| H | 2.898287  | -1.606032 | 3.081608  |
| C | 3.343091  | 4.195537  | -2.770501 |
| N | 2.513220  | 5.085547  | -3.113999 |
| C | 1.276917  | 5.198833  | -2.349608 |
| C | 0.106303  | 4.701075  | -3.264949 |
| O | -0.315992 | 5.487849  | -4.138725 |
| C | 1.083699  | 6.641886  | -1.884479 |
| C | -0.181022 | 6.805072  | -1.047030 |
| C | -0.332551 | 8.195885  | -0.434731 |
| C | -1.593139 | 8.262821  | 0.409163  |
| N | -1.719425 | 9.604183  | 1.088354  |
| O | -0.298776 | 3.532620  | -3.035405 |
| H | 3.183439  | 3.512664  | -1.929106 |
| H | 1.305598  | 4.539351  | -1.472256 |
| H | 1.044337  | 7.292870  | -2.759938 |
| H | -1.054805 | 6.580425  | -1.663649 |
| H | -0.179591 | 6.073867  | -0.237266 |
| H | -0.370261 | 8.954843  | -1.221898 |
| H | 0.537860  | 8.419185  | 0.190063  |
| H | -2.491086 | 8.136942  | -0.192587 |
| H | -1.589004 | 7.510415  | 1.196407  |

|   |           |           |           |
|---|-----------|-----------|-----------|
| H | -2.577171 | 9.669186  | 1.638437  |
| H | -0.935246 | 9.774717  | 1.720228  |
| H | -1.733880 | 10.364765 | 0.406766  |
| H | 1.957252  | 6.936954  | -1.293548 |
| H | 4.266587  | 4.081363  | -3.336100 |

### 5-PC-complex

|   |           |           |           |
|---|-----------|-----------|-----------|
| N | 0.600815  | 1.105249  | 0.576943  |
| N | 2.025205  | 0.924724  | -1.145399 |
| N | 3.643850  | -1.443966 | 1.198805  |
| N | 1.664939  | -0.448501 | 2.131953  |
| N | 4.449984  | -0.952585 | -0.921023 |
| C | -0.497343 | 1.570099  | 1.419039  |
| C | -0.143088 | 2.835475  | 2.235097  |
| C | -0.722931 | 3.930998  | 1.331284  |
| C | -1.997325 | 3.274089  | 0.809523  |
| C | -2.544970 | 3.840306  | -0.477883 |
| C | 0.937340  | 1.506552  | -0.698258 |
| C | 2.434546  | 0.104195  | -0.113517 |
| C | 1.562639  | 0.204023  | 0.968100  |
| C | 3.523787  | -0.773730 | 0.038716  |
| C | 2.729073  | -1.247947 | 2.155756  |
| O | -0.831219 | 2.851557  | 3.473307  |
| O | -1.023499 | 5.162712  | 1.947685  |
| O | -1.603905 | 1.896989  | 0.604472  |
| H | -0.739800 | 0.746743  | 2.092938  |
| H | -0.405663 | 2.225288  | 4.070647  |
| H | 0.936038  | 2.926948  | 2.377022  |
| H | -0.204772 | 5.576289  | 2.245913  |
| H | -0.031727 | 4.071410  | 0.492465  |
| H | -2.752637 | 3.312989  | 1.601685  |
| H | -1.804468 | 3.770168  | -1.275459 |
| H | -3.444025 | 3.301872  | -0.780715 |
| H | 4.335885  | -0.522880 | -1.822177 |
| H | 5.168328  | -1.645419 | -0.798058 |
| H | 0.350968  | 2.219123  | -1.262665 |
| H | 2.879398  | -1.815991 | 3.067873  |
| C | 3.218994  | 4.286977  | -2.383964 |
| N | 2.443955  | 5.188179  | -2.814078 |
| C | 1.137602  | 5.325728  | -2.183777 |
| C | 0.080011  | 4.673429  | -3.195500 |
| O | -0.428832 | 5.425281  | -4.048970 |
| C | 0.835499  | 6.741632  | -1.878342 |
| C | -0.367278 | 7.079733  | -1.069722 |
| C | -0.376662 | 8.493077  | -0.474938 |

|   |           |           |           |
|---|-----------|-----------|-----------|
| C | -0.479434 | 9.567471  | -1.543237 |
| N | -0.534572 | 10.937663 | -0.913913 |
| O | -0.118735 | 3.449489  | -3.023648 |
| H | 2.970126  | 3.620177  | -1.552118 |
| H | 1.073854  | 4.719588  | -1.268620 |
| H | 1.297127  | 7.496269  | -2.503664 |
| H | -1.275603 | 6.947437  | -1.680428 |
| H | -0.475142 | 6.368889  | -0.246396 |
| H | 0.530330  | 8.648544  | 0.115894  |
| H | -1.228023 | 8.585136  | 0.204611  |
| H | 0.378171  | 9.575590  | -2.210998 |
| H | -1.385853 | 9.462405  | -2.136435 |
| H | -0.581058 | 11.673877 | -1.619970 |
| H | -1.352835 | 11.037881 | -0.310373 |
| H | 0.292434  | 11.114869 | -0.340782 |
| H | -2.809263 | 4.888513  | -0.328734 |
| H | 4.188073  | 4.146659  | -2.859889 |

#### **6A-RC-complex**

|   |              |              |              |
|---|--------------|--------------|--------------|
| C | 1.769164000  | -2.210008000 | -0.923093000 |
| N | 0.812070000  | -1.500178000 | -0.507371000 |
| C | 0.990439000  | -0.058079000 | -0.520938000 |
| C | 0.767118000  | 0.576539000  | 0.843960000  |
| O | 0.176667000  | -0.219465000 | 1.745846000  |
| C | 0.036311000  | 0.601230000  | -1.543176000 |
| C | -1.446176000 | 0.393503000  | -1.260793000 |
| O | 1.082828000  | 1.719017000  | 1.083439000  |
| H | 2.725305000  | -1.796850000 | -1.265490000 |
| H | 2.015883000  | 0.222363000  | -0.798077000 |
| H | 0.290875000  | 0.199186000  | -2.525103000 |
| H | -1.680805000 | -0.669218000 | -1.192329000 |
| H | -1.713751000 | 0.821116000  | -0.288225000 |
| H | 0.268950000  | 1.665154000  | -1.570094000 |
| H | 1.658207000  | -3.291778000 | -0.952027000 |
| C | -2.401119000 | 1.028176000  | -2.294529000 |
| O | -1.908907000 | 1.828371000  | -3.136805000 |
| O | -3.609480000 | 0.711240000  | -2.195388000 |
| N | 1.091003000  | 4.134445000  | -4.180500000 |
| N | 1.790450000  | 2.118323000  | -4.874122000 |
| N | 4.654158000  | 4.157958000  | -6.047474000 |
| N | 2.983942000  | 5.484609000  | -4.939987000 |
| N | 4.487322000  | 1.859698000  | -6.324627000 |
| C | 0.296262000  | 5.142858000  | -3.526593000 |
| C | -1.210282000 | 5.073041000  | -3.815066000 |
| C | -1.760478000 | 5.872257000  | -2.634296000 |

|   |              |             |              |
|---|--------------|-------------|--------------|
| C | -0.840622000 | 5.409691000 | -1.472051000 |
| C | -1.384342000 | 4.289507000 | -0.677155000 |
| C | 0.837747000  | 2.778985000 | -4.264386000 |
| C | 2.727189000  | 3.079510000 | -5.208465000 |
| C | 2.314084000  | 4.338537000 | -4.781173000 |
| C | 3.964641000  | 3.016099000 | -5.873928000 |
| C | 4.136376000  | 5.299726000 | -5.579916000 |
| O | -1.576469000 | 5.559417000 | -5.084510000 |
| O | -1.566752000 | 7.248693000 | -2.955352000 |
| O | 0.406184000  | 5.002832000 | -2.116220000 |
| H | 0.695812000  | 6.105762000 | -3.855734000 |
| H | -1.567056000 | 6.526240000 | -5.033960000 |
| H | -1.552801000 | 4.040797000 | -3.735504000 |
| H | -2.132187000 | 7.790934000 | -2.395004000 |
| H | -2.811209000 | 5.661424000 | -2.436057000 |
| H | -0.626950000 | 6.275642000 | -0.840827000 |
| H | -1.427798000 | 3.305363000 | -1.120423000 |
| H | -1.855553000 | 4.473229000 | 0.277709000  |
| H | 3.945938000  | 1.013723000 | -6.290862000 |
| H | 5.328665000  | 1.876756000 | -6.875114000 |
| H | -0.067205000 | 2.348973000 | -3.850017000 |
| H | 4.737301000  | 6.187512000 | -5.747369000 |
| H | 0.065850000  | 0.290070000 | 2.566339000  |

### 6A-PC-complex

|   |              |              |              |
|---|--------------|--------------|--------------|
| C | 2.796374000  | -0.053775000 | -2.355669000 |
| N | 1.725417000  | -0.260038000 | -1.720700000 |
| C | 1.143956000  | 0.882109000  | -1.019644000 |
| C | 0.925890000  | 0.574218000  | 0.463434000  |
| O | 0.445511000  | -0.658773000 | 0.689827000  |
| C | -0.189808000 | 1.273834000  | -1.582189000 |
| C | -1.188400000 | 0.299047000  | -2.076044000 |
| O | 1.105194000  | 1.385139000  | 1.343091000  |
| H | 3.303134000  | 0.916518000  | -2.391699000 |
| H | 1.804308000  | 1.757265000  | -1.036187000 |
| H | -0.417740000 | 2.326427000  | -1.589448000 |
| H | -0.816292000 | -0.189533000 | -2.990602000 |
| H | -1.334752000 | -0.518737000 | -1.363376000 |
| H | -1.095622000 | 4.029625000  | 0.267740000  |
| H | 3.252653000  | -0.870493000 | -2.910768000 |
| C | -2.558168000 | 0.919168000  | -2.444806000 |
| O | -2.545746000 | 2.068343000  | -2.963284000 |
| O | -3.569250000 | 0.211425000  | -2.228887000 |
| N | 0.863480000  | 3.724898000  | -3.965540000 |
| N | 1.142418000  | 1.706778000  | -4.910570000 |
| N | 4.650530000  | 2.891096000  | -5.036706000 |

|   |              |              |              |
|---|--------------|--------------|--------------|
| N | 3.174924000  | 4.516590000  | -4.057939000 |
| N | 3.938118000  | 0.825726000  | -5.822762000 |
| C | 0.241973000  | 4.857304000  | -3.327157000 |
| C | -1.226062000 | 5.094899000  | -3.705661000 |
| C | -1.663570000 | 6.005910000  | -2.556971000 |
| C | -0.899130000 | 5.425335000  | -1.355706000 |
| C | -1.729171000 | 4.505917000  | -0.481316000 |
| C | 0.286940000  | 2.533714000  | -4.365267000 |
| C | 2.354087000  | 2.370462000  | -4.858068000 |
| C | 2.203322000  | 3.624237000  | -4.272075000 |
| C | 3.656072000  | 2.010176000  | -5.246777000 |
| C | 4.358568000  | 4.068247000  | -4.471459000 |
| O | -1.416686000 | 5.628691000  | -4.994300000 |
| O | -1.223946000 | 7.321629000  | -2.903746000 |
| O | 0.216903000  | 4.676561000  | -1.917904000 |
| H | 0.845355000  | 5.730119000  | -3.593956000 |
| H | -1.242171000 | 6.579386000  | -4.935566000 |
| H | -1.772666000 | 4.154846000  | -3.637126000 |
| H | -1.673242000 | 7.965402000  | -2.345678000 |
| H | -2.743443000 | 5.989595000  | -2.403107000 |
| H | -0.485788000 | 6.249181000  | -0.768270000 |
| H | -2.203356000 | 3.728206000  | -1.082634000 |
| H | -2.500029000 | 5.081355000  | 0.034890000  |
| H | 3.226990000  | 0.119464000  | -5.897418000 |
| H | 4.896512000  | 0.569150000  | -5.986970000 |
| H | -0.760520000 | 2.334323000  | -4.187791000 |
| H | 5.199402000  | 4.739158000  | -4.329880000 |
| H | 0.269923000  | -0.743837000 | 1.641808000  |

### **6B-RC-complex**

|   |              |              |              |
|---|--------------|--------------|--------------|
| C | 2.166993000  | -1.716711000 | -0.020953000 |
| N | 1.344340000  | -0.767208000 | 0.104660000  |
| C | 1.500689000  | 0.391022000  | -0.760905000 |
| C | 1.788033000  | 1.697799000  | 0.051108000  |
| O | 1.163380000  | 1.880502000  | 1.121989000  |
| C | 0.241720000  | 0.577107000  | -1.628233000 |
| C | -1.051005000 | 0.682666000  | -0.826811000 |
| O | 2.608301000  | 2.479295000  | -0.488659000 |
| H | 2.990028000  | -1.710296000 | -0.747085000 |
| H | 2.351184000  | 0.255819000  | -1.441078000 |
| H | 0.170386000  | -0.262114000 | -2.325304000 |
| H | -1.299165000 | -0.269048000 | -0.350458000 |
| H | -0.943720000 | 1.395542000  | -0.008599000 |
| H | 0.374505000  | 1.477202000  | -2.229952000 |
| H | 2.075850000  | -2.596873000 | 0.613468000  |
| C | -2.234596000 | 1.093309000  | -1.652862000 |

|   |              |             |              |
|---|--------------|-------------|--------------|
| O | -2.262905000 | 1.224393000 | -2.856046000 |
| O | -3.324341000 | 1.314056000 | -0.885938000 |
| H | -4.059209000 | 1.566458000 | -1.468502000 |
| N | -0.731693000 | 4.634423000 | -5.127530000 |
| N | -2.884907000 | 4.200357000 | -5.589776000 |
| N | -2.065112000 | 6.283538000 | -8.541127000 |
| N | -0.178541000 | 5.996872000 | -7.079216000 |
| N | -4.161934000 | 5.382077000 | -8.122670000 |
| C | 0.573943000  | 4.582640000 | -4.449138000 |
| C | 1.014990000  | 5.962478000 | -3.961031000 |
| C | 0.401967000  | 5.999950000 | -2.552744000 |
| C | 0.544736000  | 4.543915000 | -2.077650000 |
| C | -0.484503000 | 4.099171000 | -1.121270000 |
| C | -1.895478000 | 4.003305000 | -4.751803000 |
| C | -2.344808000 | 4.996663000 | -6.579634000 |
| C | -1.003826000 | 5.269991000 | -6.315485000 |
| C | -2.876791000 | 5.549465000 | -7.759689000 |
| C | -0.792489000 | 6.459287000 | -8.165721000 |
| O | 2.430390000  | 5.970226000 | -3.894523000 |
| O | 1.105222000  | 6.855847000 | -1.667476000 |
| O | 0.471492000  | 3.758927000 | -3.317371000 |
| H | 1.299254000  | 4.165057000 | -5.149207000 |
| H | 2.671251000  | 6.521953000 | -3.135376000 |
| H | 0.647474000  | 6.762739000 | -4.606544000 |
| H | 0.762904000  | 7.753233000 | -1.756763000 |
| H | -0.652827000 | 6.278540000 | -2.617263000 |
| H | 1.539397000  | 4.393772000 | -1.657224000 |
| H | -1.529597000 | 4.141612000 | -1.399618000 |
| H | -0.204195000 | 3.694337000 | -0.160598000 |
| H | -4.758503000 | 4.764262000 | -7.600759000 |
| H | -4.474017000 | 5.719786000 | -9.017064000 |
| H | -1.936693000 | 3.395304000 | -3.863880000 |
| H | -0.186456000 | 7.057199000 | -8.838364000 |

### 6B-PC-complex

|   |              |              |              |
|---|--------------|--------------|--------------|
| C | 1.520811000  | -1.867144000 | -2.036314000 |
| N | 0.947090000  | -0.995613000 | -1.324614000 |
| C | 1.048904000  | 0.397965000  | -1.743359000 |
| C | 1.958877000  | 1.178394000  | -0.679289000 |
| O | 1.556298000  | 1.184631000  | 0.503009000  |
| C | -0.278312000 | 1.054916000  | -1.831103000 |
| C | -1.295384000 | 0.847317000  | -0.770922000 |
| O | 2.975678000  | 1.726471000  | -1.155660000 |
| H | 2.070628000  | -1.630484000 | -2.955504000 |
| H | 1.569145000  | 0.488974000  | -2.704032000 |
| H | -0.345614000 | 1.942165000  | -2.444133000 |



|   |              |              |              |
|---|--------------|--------------|--------------|
| H | -1.536125000 | -0.210214000 | -0.631603000 |
| H | -0.882628000 | 1.157103000  | 0.203432000  |
| H | 0.506476000  | 3.506548000  | -0.266568000 |
| H | 1.479784000  | -2.913997000 | -1.740326000 |
| C | -2.576625000 | 1.608837000  | -0.960701000 |
| O | -2.777911000 | 2.494708000  | -1.760296000 |
| O | -3.523264000 | 1.204779000  | -0.089049000 |
| H | -4.317460000 | 1.745869000  | -0.229063000 |
| N | -0.453780000 | 4.629436000  | -4.847139000 |
| N | -2.461831000 | 3.802947000  | -5.401535000 |
| N | -1.370894000 | 4.972210000  | -8.739397000 |
| N | 0.275867000  | 5.397332000  | -7.044501000 |
| N | -3.373731000 | 3.860250000  | -8.337680000 |
| C | 0.694658000  | 5.043377000  | -4.043650000 |
| C | 0.625770000  | 6.518042000  | -3.617778000 |
| C | 0.080810000  | 6.409647000  | -2.183203000 |
| C | 0.716032000  | 5.109840000  | -1.693856000 |
| C | -0.007360000 | 4.420748000  | -0.562211000 |
| C | -1.609292000 | 4.015056000  | -4.427470000 |
| C | -1.840282000 | 4.308389000  | -6.524030000 |
| C | -0.589697000 | 4.824788000  | -6.199416000 |
| C | -2.221443000 | 4.397440000  | -7.876488000 |
| C | -0.194280000 | 5.427174000  | -8.289700000 |
| O | 1.943522000  | 7.040559000  | -3.612262000 |
| O | 0.485201000  | 7.487606000  | -1.354294000 |
| O | 0.720889000  | 4.265464000  | -2.866209000 |
| H | 1.586883000  | 4.872398000  | -4.648269000 |
| H | 1.989549000  | 7.671900000  | -2.878350000 |
| H | -0.021628000 | 7.096883000  | -4.281285000 |
| H | -0.150061000 | 8.208472000  | -1.437156000 |
| H | -1.008068000 | 6.312445000  | -2.203053000 |
| H | 1.752490000  | 5.322806000  | -1.409762000 |
| H | -1.027378000 | 4.170306000  | -0.855057000 |
| H | -0.039916000 | 5.091819000  | 0.298228000  |
| H | -4.197130000 | 3.829516000  | -7.634787000 |
| H | -3.779794000 | 4.338124000  | -9.228752000 |
| H | -1.757907000 | 3.721279000  | -3.400897000 |
| H | 0.447322000  | 5.879919000  | -9.037154000 |

### **6C-RC-complex**

|   |             |              |              |
|---|-------------|--------------|--------------|
| C | 2.032204000 | -1.869296000 | -1.018833000 |
| N | 1.402914000 | -0.916143000 | -0.480860000 |
| C | 1.430295000 | 0.371631000  | -1.158484000 |
| C | 1.972489000 | 1.470425000  | -0.251090000 |
| O | 1.587255000 | 1.360123000  | 1.028928000  |
| C | 0.022010000 | 0.746921000  | -1.670137000 |

|   |              |              |              |
|---|--------------|--------------|--------------|
| C | -1.060410000 | 0.746480000  | -0.596904000 |
| O | 2.658599000  | 2.377737000  | -0.656265000 |
| H | 2.605193000  | -1.769587000 | -1.947601000 |
| H | 2.101133000  | 0.366109000  | -2.025275000 |
| H | -0.235154000 | 0.025208000  | -2.447907000 |
| H | -1.179113000 | -0.238430000 | -0.145497000 |
| H | -0.805133000 | 1.421043000  | 0.224659000  |
| H | 0.080373000  | 1.724250000  | -2.147618000 |
| H | 2.014401000  | -2.850180000 | -0.549275000 |
| C | -2.396054000 | 1.202353000  | -1.116202000 |
| O | -2.597714000 | 1.750200000  | -2.176079000 |
| O | -3.381824000 | 0.955769000  | -0.233281000 |
| H | -4.214141000 | 1.299218000  | -0.598016000 |
| N | -0.506756000 | 4.620655000  | -4.843961000 |
| N | -2.586175000 | 4.012852000  | -5.427844000 |
| N | -1.645136000 | 5.887671000  | -8.481785000 |
| N | 0.125758000  | 5.849145000  | -6.856917000 |
| N | -3.713160000 | 4.888872000  | -8.151956000 |
| C | 0.737656000  | 4.729420000  | -4.072809000 |
| C | 1.005711000  | 6.163883000  | -3.613220000 |
| C | 0.338555000  | 6.176710000  | -2.228729000 |
| C | 0.633242000  | 4.752170000  | -1.711873000 |
| C | -0.334132000 | 4.230513000  | -0.732661000 |
| C | -1.660514000 | 3.952684000  | -4.500602000 |
| C | -2.012967000 | 4.753949000  | -6.441926000 |
| C | -0.716822000 | 5.135044000  | -6.100737000 |
| C | -2.475521000 | 5.169743000  | -7.704708000 |
| C | -0.421253000 | 6.178171000  | -8.025013000 |
| O | 2.407423000  | 6.330214000  | -3.496985000 |
| O | 0.906146000  | 7.127881000  | -1.347630000 |
| O | 0.625941000  | 3.937197000  | -2.915077000 |
| H | 1.552972000  | 4.366223000  | -4.700312000 |
| H | 2.557369000  | 6.951717000  | -2.769106000 |
| H | 0.576250000  | 6.897981000  | -4.298452000 |
| H | 0.455039000  | 7.973058000  | -1.459788000 |
| H | -0.738436000 | 6.324073000  | -2.336436000 |
| H | 1.644450000  | 4.744786000  | -1.297152000 |
| H | -1.313698000 | 3.916516000  | -1.064891000 |
| H | -0.112359000 | 4.254736000  | 0.323437000  |
| H | -4.316464000 | 4.281624000  | -7.625408000 |
| H | -3.969484000 | 5.133503000  | -9.093156000 |
| H | -1.746074000 | 3.425194000  | -3.565555000 |
| H | 0.202333000  | 6.757214000  | -8.698080000 |
| H | 1.947528000  | 2.117783000  | 1.519916000  |

## 6C-PC-complex

|   |           |           |           |
|---|-----------|-----------|-----------|
| C | -0.303303 | 1.219100  | -3.304977 |
| N | -1.297763 | 1.065802  | -2.540936 |
| C | -1.281870 | 1.814368  | -1.285324 |
| C | -1.286431 | 0.851905  | -0.089266 |
| O | -2.198552 | -0.125584 | -0.206933 |
| C | -2.477401 | 2.701317  | -1.142650 |
| C | -3.799534 | 2.335143  | -1.703498 |
| O | -0.584688 | 0.994212  | 0.883029  |
| H | 0.540103  | 1.876952  | -3.076545 |
| H | -0.376907 | 2.417825  | -1.171903 |
| H | -2.404701 | 3.532729  | -0.456945 |
| H | -3.735866 | 2.087833  | -2.764398 |
| H | -4.187001 | 1.418590  | -1.229860 |
| H | 1.428518  | 3.631782  | 0.273517  |
| H | -0.277678 | 0.683360  | -4.250461 |
| C | -4.853820 | 3.391172  | -1.491353 |
| O | -4.857741 | 4.221769  | -0.617090 |
| O | -5.860566 | 3.271221  | -2.384289 |
| H | -6.533265 | 3.940786  | -2.176989 |
| N | -0.916179 | 4.995928  | -3.708083 |
| N | -3.155466 | 4.919477  | -3.552935 |
| N | -2.690887 | 2.545263  | -6.356444 |
| N | -0.607756 | 3.459886  | -5.582842 |
| N | -4.749804 | 3.064145  | -5.409972 |
| C | 0.467067  | 5.231550  | -3.344900 |
| C | 0.791354  | 6.686588  | -2.972926 |
| C | 0.861369  | 6.635295  | -1.434438 |
| C | 1.392605  | 5.226988  | -1.174650 |
| C | 1.041862  | 4.646166  | 0.174931  |
| C | -2.055269 | 5.418461  | -3.055839 |
| C | -2.730357 | 4.100830  | -4.582161 |
| C | -1.343461 | 4.137224  | -4.698091 |
| C | -3.412431 | 3.229693  | -5.451135 |
| C | -1.362896 | 2.701889  | -6.376059 |
| O | 2.063048  | 7.001345  | -3.514978 |
| O | 1.748591  | 7.598354  | -0.890867 |
| O | 0.793682  | 4.428943  | -2.211698 |
| H | 1.062608  | 4.925737  | -4.204296 |
| H | 2.494334  | 7.596596  | -2.882825 |
| H | 0.032201  | 7.379878  | -3.343286 |
| H | 1.269009  | 8.419976  | -0.731528 |
| H | -0.138846 | 6.741412  | -1.006741 |
| H | 2.479833  | 5.242971  | -1.312933 |
| H | -0.040684 | 4.623832  | 0.310672  |
| H | 1.482743  | 5.259887  | 0.961958  |
| H | -5.258425 | 3.380736  | -4.598663 |

|   |           |           |           |
|---|-----------|-----------|-----------|
| H | -5.150986 | 2.313045  | -5.947432 |
| H | -2.009195 | 6.094879  | -2.218160 |
| H | -0.835218 | 2.126049  | -7.128781 |
| H | -2.183312 | -0.658281 | 0.605694  |

**6D-RC-complex**

|   |              |              |              |
|---|--------------|--------------|--------------|
| C | 1.932595000  | -0.937912000 | 0.907125000  |
| N | 0.742569000  | -0.545638000 | 0.763801000  |
| C | 0.518709000  | 0.786353000  | 0.219582000  |
| C | -0.138217000 | 1.750945000  | 1.257201000  |
| O | -0.595692000 | 1.279172000  | 2.320774000  |
| C | -0.334576000 | 0.688367000  | -1.059215000 |
| C | -1.762103000 | 0.203020000  | -0.839358000 |
| O | -0.141465000 | 2.960932000  | 0.907690000  |
| H | 2.806039000  | -0.322541000 | 0.652708000  |
| H | 1.477590000  | 1.252207000  | -0.053588000 |
| H | 0.176264000  | 0.023065000  | -1.761256000 |
| H | -1.765011000 | -0.758735000 | -0.323002000 |
| H | -2.293802000 | 0.900202000  | -0.185513000 |
| H | -0.355636000 | 1.673636000  | -1.522900000 |
| H | 2.131698000  | -1.933210000 | 1.302439000  |
| C | -2.628265000 | 0.062832000  | -2.106989000 |
| O | -2.195560000 | 0.542976000  | -3.187412000 |
| O | -3.737977000 | -0.514070000 | -1.950164000 |
| N | -4.292249000 | 4.240892000  | 1.237025000  |
| N | -3.132427000 | 4.506248000  | 3.138842000  |
| N | -6.552353000 | 4.975452000  | 4.481291000  |
| N | -6.555765000 | 4.541924000  | 2.116621000  |
| N | -4.616758000 | 5.120545000  | 5.755062000  |
| C | -4.567732000 | 4.037910000  | -0.177005000 |
| C | -4.468361000 | 5.321920000  | -1.033482000 |
| C | -4.053637000 | 4.745377000  | -2.387485000 |
| C | -3.073339000 | 3.646273000  | -1.953913000 |
| C | -1.685913000 | 4.133156000  | -1.771108000 |
| C | -3.058936000 | 4.263714000  | 1.851707000  |
| C | -4.482109000 | 4.652983000  | 3.389496000  |
| C | -5.222620000 | 4.485049000  | 2.220176000  |
| C | -5.211862000 | 4.913816000  | 4.563512000  |
| C | -7.133155000 | 4.786874000  | 3.289720000  |
| O | -5.637256000 | 6.102399000  | -1.048209000 |
| O | -5.243868000 | 4.223155000  | -2.973725000 |
| O | -3.624544000 | 3.135985000  | -0.705007000 |
| H | -5.582262000 | 3.635257000  | -0.238887000 |
| H | -6.260083000 | 5.674804000  | -1.653630000 |
| H | -3.661827000 | 5.944799000  | -0.644499000 |

|   |              |             |              |
|---|--------------|-------------|--------------|
| H | -5.075639000 | 4.000315000 | -3.895830000 |
| H | -3.585940000 | 5.487065000 | -3.036672000 |
| H | -3.100376000 | 2.808725000 | -2.662521000 |
| H | -1.109837000 | 3.820475000 | -0.910320000 |
| H | -1.200754000 | 4.643661000 | -2.593086000 |
| H | -3.629995000 | 4.958808000 | 5.856607000  |
| H | -5.182785000 | 5.185080000 | 6.584052000  |
| H | -2.148479000 | 4.037352000 | 1.313713000  |
| H | -8.217019000 | 4.842384000 | 3.286008000  |

### 6D-PC-complex

|   |              |              |              |
|---|--------------|--------------|--------------|
| C | 1.875071000  | -0.911748000 | 1.028759000  |
| N | 0.679072000  | -0.586483000 | 0.789885000  |
| C | 0.437227000  | 0.732579000  | 0.207686000  |
| C | -0.362231000 | 1.655860000  | 1.224118000  |
| O | -1.227411000 | 1.113703000  | 1.942083000  |
| C | -0.343744000 | 0.632482000  | -1.057984000 |
| C | -1.594798000 | -0.158679000 | -1.162273000 |
| O | -0.063442000 | 2.873288000  | 1.165687000  |
| H | 2.733239000  | -0.260134000 | 0.818675000  |
| H | 1.383201000  | 1.252900000  | 0.011500000  |
| H | -0.108181000 | 1.321845000  | -1.855833000 |
| H | -1.384179000 | -1.237903000 | -1.118452000 |
| H | -2.228320000 | 0.020043000  | -0.284855000 |
| H | -1.032687000 | 3.459310000  | -1.089826000 |
| H | 2.092320000  | -1.885300000 | 1.466235000  |
| C | -2.449602000 | 0.063692000  | -2.432184000 |
| O | -1.923417000 | 0.639274000  | -3.417888000 |
| O | -3.627668000 | -0.376489000 | -2.373659000 |
| N | -4.282380000 | 4.261385000  | 1.288122000  |
| N | -3.096604000 | 4.664162000  | 3.149806000  |
| N | -6.501213000 | 5.168332000  | 4.516876000  |
| N | -6.535817000 | 4.585847000  | 2.184642000  |
| N | -4.547638000 | 5.426074000  | 5.745215000  |
| C | -4.573530000 | 3.965608000  | -0.109831000 |
| C | -4.564004000 | 5.210450000  | -1.031982000 |
| C | -4.056738000 | 4.611702000  | -2.346827000 |
| C | -3.035790000 | 3.588998000  | -1.859761000 |
| C | -1.645780000 | 4.165068000  | -1.647576000 |
| C | -3.040479000 | 4.338911000  | 1.880143000  |
| C | -4.444025000 | 4.809303000  | 3.412405000  |
| C | -5.200183000 | 4.555698000  | 2.268476000  |
| C | -5.158861000 | 5.133016000  | 4.579650000  |
| C | -7.098125000 | 4.895639000  | 3.349671000  |
| O | -5.799265000 | 5.876127000  | -1.124079000 |
| O | -5.195411000 | 4.003101000  | -2.957816000 |

|   |              |             |              |
|---|--------------|-------------|--------------|
| O | -3.588907000 | 3.093854000 | -0.604633000 |
| H | -5.563697000 | 3.502687000 | -0.128738000 |
| H | -6.346871000 | 5.374758000 | -1.745490000 |
| H | -3.840278000 | 5.929338000 | -0.648544000 |
| H | -4.959930000 | 3.702821000 | -3.842503000 |
| H | -3.614156000 | 5.362562000 | -3.004655000 |
| H | -2.985389000 | 2.732210000 | -2.531409000 |
| H | -1.674448000 | 5.101932000 | -1.087482000 |
| H | -1.176384000 | 4.359175000 | -2.614009000 |
| H | -3.557894000 | 5.278106000 | 5.840725000  |
| H | -5.101265000 | 5.525651000 | 6.579133000  |
| H | -2.137221000 | 4.082897000 | 1.344795000  |
| H | -8.182525000 | 4.933267000 | 3.361281000  |

### 7A-RC-complex

|   |              |              |              |
|---|--------------|--------------|--------------|
| C | 1.530078000  | -0.700077000 | 0.215247000  |
| C | 1.092225000  | 0.604091000  | 0.047302000  |
| C | 2.038543000  | 1.646831000  | -0.042248000 |
| N | 0.628562000  | -1.707749000 | 0.312066000  |
| C | -0.803198000 | -1.464526000 | 0.369060000  |
| C | -1.075832000 | -0.023857000 | 0.811980000  |
| N | -0.293630000 | 0.891084000  | -0.017068000 |
| C | -2.557588000 | 0.282514000  | 0.763233000  |
| O | -2.800056000 | 1.600878000  | 0.695840000  |
| O | -3.429828000 | -0.549144000 | 0.832040000  |
| O | 1.791915000  | 2.857781000  | -0.157181000 |
| N | 5.057929000  | -0.384071000 | 0.242223000  |
| H | -0.798283000 | 0.050013000  | 1.873140000  |
| H | 4.074793000  | 1.931689000  | -0.060185000 |
| H | 0.979970000  | -2.607819000 | 0.592336000  |
| H | -1.252872000 | -2.151678000 | 1.082762000  |
| H | -1.265331000 | -1.636060000 | -0.606337000 |
| H | -0.462429000 | 1.863435000  | 0.210583000  |
| H | 5.272600000  | -1.299244000 | 0.605868000  |
| H | 5.705027000  | 0.336582000  | 0.521502000  |
| N | 2.845038000  | -1.047710000 | 0.309013000  |
| C | 3.727082000  | -0.088649000 | 0.202508000  |
| N | 3.372555000  | 1.208986000  | 0.012410000  |
| H | -3.760963000 | 1.743482000  | 0.707603000  |
| N | 2.513806000  | -0.317704000 | 3.618173000  |
| N | 2.928124000  | 1.877729000  | 3.411321000  |
| N | 6.410977000  | 0.613973000  | 3.355189000  |
| N | 4.804710000  | -1.157186000 | 3.600470000  |
| N | 5.832592000  | 2.851850000  | 3.158047000  |
| C | 1.789139000  | -1.588535000 | 3.694358000  |
| C | 1.867838000  | -2.219581000 | 5.086672000  |

|   |              |              |             |
|---|--------------|--------------|-------------|
| C | 0.581638000  | -1.691953000 | 5.745177000 |
| C | -0.406099000 | -1.694537000 | 4.557812000 |
| C | -1.533681000 | -0.754019000 | 4.659819000 |
| C | 2.003311000  | 0.956026000  | 3.519646000 |
| C | 4.117546000  | 1.176403000  | 3.431830000 |
| C | 3.880307000  | -0.190679000 | 3.559106000 |
| C | 5.464093000  | 1.569923000  | 3.317712000 |
| C | 6.036567000  | -0.663124000 | 3.496531000 |
| O | 1.811708000  | -3.625892000 | 4.932640000 |
| O | 0.096656000  | -2.536151000 | 6.771068000 |
| O | 0.426815000  | -1.352987000 | 3.421247000 |
| H | 2.220234000  | -2.250231000 | 2.942081000 |
| H | 1.363349000  | -3.978061000 | 5.715913000 |
| H | 2.772480000  | -1.914960000 | 5.618501000 |
| H | 0.498356000  | -2.280823000 | 7.610079000 |
| H | 0.736007000  | -0.671653000 | 6.103996000 |
| H | -0.766649000 | -2.721102000 | 4.435651000 |
| H | -1.367776000 | 0.303404000  | 4.505808000 |
| H | -2.501564000 | -1.093723000 | 4.995904000 |
| H | 5.142984000  | 3.581771000  | 3.124077000 |
| H | 6.806423000  | 3.089492000  | 3.079898000 |
| H | 0.941972000  | 1.130541000  | 3.522188000 |
| H | 6.845025000  | -1.385988000 | 3.520983000 |

#### 7A-PC-complex

|   |              |              |              |
|---|--------------|--------------|--------------|
| C | 1.638719000  | -0.812229000 | 0.215965000  |
| C | 0.956688000  | 0.393678000  | 0.360348000  |
| C | 1.678159000  | 1.605438000  | 0.480179000  |
| N | 0.934164000  | -1.968485000 | 0.211495000  |
| C | -0.499327000 | -1.969349000 | -0.078995000 |
| C | -1.155576000 | -0.739743000 | 0.474422000  |
| N | -0.420347000 | 0.398310000  | 0.518185000  |
| C | -2.515257000 | -0.758841000 | 0.863675000  |
| O | -2.977409000 | 0.465377000  | 1.288631000  |
| O | -3.255173000 | -1.746605000 | 0.843358000  |
| O | 1.196498000  | 2.726814000  | 0.676206000  |
| N | 5.014315000  | 0.197323000  | 0.112365000  |
| H | -2.038235000 | 0.384549000  | 3.646294000  |
| H | 3.618145000  | 2.275852000  | 0.489990000  |
| H | 1.453318000  | -2.806298000 | -0.001840000 |
| H | -0.955104000 | -2.850598000 | 0.366854000  |
| H | -0.662866000 | -2.028457000 | -1.164350000 |
| H | -0.841802000 | 1.254200000  | 0.850984000  |
| H | 5.458328000  | -0.703577000 | 0.172187000  |
| H | 5.571532000  | 0.997638000  | 0.358229000  |
| N | 2.987555000  | -0.895047000 | 0.136608000  |

|   |              |              |             |
|---|--------------|--------------|-------------|
| C | 3.667991000  | 0.225127000  | 0.220703000 |
| N | 3.066523000  | 1.435977000  | 0.383881000 |
| H | -3.908302000 | 0.352163000  | 1.528757000 |
| N | 2.648667000  | -0.099237000 | 3.629803000 |
| N | 3.495879000  | 1.976306000  | 3.724524000 |
| N | 6.647351000  | 0.074524000  | 3.302665000 |
| N | 4.720660000  | -1.361428000 | 3.367856000 |
| N | 6.531061000  | 2.386154000  | 3.455960000 |
| C | 1.675903000  | -1.194180000 | 3.592892000 |
| C | 1.577734000  | -1.949747000 | 4.924101000 |
| C | 0.363210000  | -1.273007000 | 5.583901000 |
| C | -0.525478000 | -0.955955000 | 4.382037000 |
| C | -1.480797000 | 0.199239000  | 4.563949000 |
| C | 2.405719000  | 1.249258000  | 3.752111000 |
| C | 4.517853000  | 1.059286000  | 3.576971000 |
| C | 4.010615000  | -0.237492000 | 3.516482000 |
| C | 5.913822000  | 1.191706000  | 3.452691000 |
| C | 6.024075000  | -1.109538000 | 3.270470000 |
| O | 1.296661000  | -3.309166000 | 4.637426000 |
| O | -0.326505000 | -2.126635000 | 6.482763000 |
| O | 0.406375000  | -0.649374000 | 3.324042000 |
| H | 1.983263000  | -1.871442000 | 2.795213000 |
| H | 0.712260000  | -3.627852000 | 5.341770000 |
| H | 2.494457000  | -1.854271000 | 5.511027000 |
| H | 0.072630000  | -2.056060000 | 7.357953000 |
| H | 0.674763000  | -0.348775000 | 6.077890000 |
| H | -1.074664000 | -1.864276000 | 4.111490000 |
| H | -0.940224000 | 1.107213000  | 4.837775000 |
| H | -2.189700000 | -0.037482000 | 5.359168000 |
| H | 6.009402000  | 3.228446000  | 3.623816000 |
| H | 7.534988000  | 2.430513000  | 3.418972000 |
| H | 1.400566000  | 1.625711000  | 3.828369000 |
| H | 6.669402000  | -1.972724000 | 3.146669000 |

### 8A-RC-complex

|   |              |              |              |
|---|--------------|--------------|--------------|
| N | 1.153279000  | 0.828202000  | -0.762939000 |
| N | -0.251258000 | -0.672006000 | -1.639053000 |
| N | 2.958068000  | -2.285462000 | -2.544027000 |
| N | 3.273216000  | -0.205618000 | -1.384057000 |
| N | 0.877697000  | -3.181239000 | -3.037112000 |
| C | 1.635077000  | 1.988141000  | -0.006114000 |
| C | 1.947514000  | 3.181254000  | -0.909648000 |
| C | 0.602421000  | 3.927229000  | -0.917316000 |
| C | 0.101751000  | 3.703743000  | 0.529020000  |
| C | -1.360103000 | 3.740969000  | 0.705302000  |
| C | -0.145819000 | 0.452799000  | -0.971346000 |



|   |              |              |              |
|---|--------------|--------------|--------------|
| C | 1.049598000  | -1.065358000 | -1.884448000 |
| C | 1.939750000  | -0.137750000 | -1.348036000 |
| C | 1.616986000  | -2.196690000 | -2.499909000 |
| C | 3.692278000  | -1.309128000 | -1.999837000 |
| O | 2.948598000  | 3.956754000  | -0.277969000 |
| O | 0.737171000  | 5.313379000  | -1.162336000 |
| O | 0.622253000  | 2.396782000  | 0.884671000  |
| H | 2.521392000  | 1.666675000  | 0.541625000  |
| H | 2.784800000  | 4.880907000  | -0.518280000 |
| H | 2.261285000  | 2.862821000  | -1.907449000 |
| H | 0.706745000  | 5.473045000  | -2.113173000 |
| H | -0.080569000 | 3.460578000  | -1.630833000 |
| H | 0.587298000  | 4.456863000  | 1.158064000  |
| H | -1.965590000 | 2.893940000  | 0.412568000  |
| H | -1.846502000 | 4.655985000  | 1.008541000  |
| H | -0.123491000 | -3.176843000 | -2.952645000 |
| H | 1.331427000  | -4.001630000 | -3.401283000 |
| H | -0.981472000 | 1.012526000  | -0.590945000 |
| H | 4.766717000  | -1.441571000 | -2.062458000 |
| O | -2.899539000 | -1.557720000 | -1.549861000 |
| O | -6.146265000 | -0.820895000 | 1.213181000  |
| C | -3.051425000 | 0.095805000  | 1.951284000  |
| C | -2.045698000 | -1.043320000 | 1.772404000  |
| C | -0.701665000 | -0.773977000 | 2.411277000  |
| C | 2.869451000  | -1.633918000 | 1.560709000  |
| C | 1.478943000  | -3.454831000 | 0.810923000  |
| O | -0.558640000 | 0.061078000  | 3.285637000  |
| H | -6.733286000 | 0.091116000  | -0.676675000 |
| O | 4.199086000  | 0.252122000  | 2.068946000  |
| O | -6.063566000 | 0.094808000  | -1.376205000 |
| H | -4.667346000 | 1.098779000  | 0.967446000  |
| C | 0.478184000  | -1.544598000 | 1.904370000  |
| O | 5.245713000  | -1.581545000 | 1.310243000  |
| C | 1.743851000  | -0.979474000 | 2.051208000  |
| C | 2.734557000  | -2.885195000 | 0.954099000  |
| H | -3.733170000 | 0.139511000  | -2.397049000 |
| H | -4.435011000 | -1.907334000 | 0.755969000  |
| H | -5.360988000 | -1.861052000 | -1.473896000 |
| H | -6.572625000 | -1.682950000 | 1.286521000  |
| H | -1.965631000 | -1.272969000 | -1.699550000 |
| C | 4.220134000  | -1.020076000 | 1.625095000  |
| C | 0.351311000  | -2.780020000 | 1.264646000  |
| H | -3.629395000 | -0.025790000 | 2.869475000  |
| H | -2.422938000 | -1.978941000 | 2.198838000  |
| H | -2.513825000 | 1.039645000  | 2.054100000  |
| H | -1.891605000 | -1.245379000 | 0.712839000  |

|   |              |              |              |
|---|--------------|--------------|--------------|
| H | 1.831947000  | -0.015078000 | 2.528760000  |
| H | 3.614962000  | -3.385516000 | 0.576533000  |
| H | 1.373302000  | -4.415258000 | 0.325047000  |
| H | -0.623668000 | -3.225456000 | 1.123637000  |
| O | -3.296656000 | 0.472560000  | -0.439372000 |
| C | -4.926089000 | -0.968578000 | 0.496379000  |
| C | -5.107259000 | -0.895030000 | -1.030501000 |
| C | -3.723941000 | -0.431141000 | -1.464518000 |
| C | -4.020778000 | 0.234668000  | 0.785488000  |
| H | 5.110807000  | 0.584517000  | 2.075936000  |

### 8A-PC-complex

|   |              |              |              |
|---|--------------|--------------|--------------|
| N | 1.145995000  | 0.727011000  | -0.918678000 |
| N | -0.351278000 | -0.812630000 | -1.535649000 |
| N | 2.749110000  | -2.620412000 | -2.453989000 |
| N | 3.192990000  | -0.437243000 | -1.556095000 |
| N | 0.618992000  | -3.497941000 | -2.709106000 |
| C | 1.701215000  | 1.944685000  | -0.327684000 |
| C | 1.717354000  | 3.131943000  | -1.297351000 |
| C | 0.410080000  | 3.859302000  | -0.934033000 |
| C | 0.312419000  | 3.622293000  | 0.573124000  |
| C | -1.086113000 | 3.647199000  | 1.144045000  |
| C | -0.172941000 | 0.373565000  | -1.003535000 |
| C | 0.920811000  | -1.272861000 | -1.816575000 |
| C | 1.867607000  | -0.321723000 | -1.442810000 |
| C | 1.416947000  | -2.483947000 | -2.334043000 |
| C | 3.542166000  | -1.614210000 | -2.070597000 |
| O | 2.839355000  | 3.938068000  | -0.982956000 |
| O | 0.457989000  | 5.251275000  | -1.199216000 |
| O | 0.894777000  | 2.315602000  | 0.771146000  |
| H | 2.711439000  | 1.698067000  | -0.001977000 |
| H | 2.576995000  | 4.857490000  | -1.141310000 |
| H | 1.749511000  | 2.801585000  | -2.338709000 |
| H | 0.187080000  | 5.411532000  | -2.111032000 |
| H | -0.433944000 | 3.391510000  | -1.448083000 |
| H | 0.941100000  | 4.364976000  | 1.075238000  |
| H | -1.725507000 | 2.917203000  | 0.644888000  |
| H | -1.517946000 | 4.639564000  | 1.005283000  |
| H | -0.371665000 | -3.459237000 | -2.545794000 |
| H | 1.028845000  | -4.370827000 | -2.995201000 |
| H | -0.965910000 | 1.001096000  | -0.636996000 |
| H | 4.606401000  | -1.786869000 | -2.187548000 |
| O | -3.028066000 | -1.596540000 | -1.580727000 |
| O | -6.199345000 | -0.582949000 | 1.238865000  |
| C | -3.039744000 | 0.023563000  | 1.998935000  |
| C | -1.951062000 | -1.074687000 | 1.905037000  |

|   |              |              |              |
|---|--------------|--------------|--------------|
| C | -0.613115000 | -0.668412000 | 2.481685000  |
| C | 2.978795000  | -1.395901000 | 1.591139000  |
| C | 1.686325000  | -3.372737000 | 1.107899000  |
| O | -0.504345000 | 0.250241000  | 3.272984000  |
| H | -6.669861000 | 0.322030000  | -0.551658000 |
| O | 4.207455000  | 0.610489000  | 1.819608000  |
| O | -6.100872000 | 0.212761000  | -1.329617000 |
| H | -1.070296000 | 3.424521000  | 2.210930000  |
| C | 0.599219000  | -1.410898000 | 2.011672000  |
| O | 5.340996000  | -1.243349000 | 1.262340000  |
| C | 1.829024000  | -0.754595000 | 2.042101000  |
| C | 2.906236000  | -2.716055000 | 1.139269000  |
| H | -3.768256000 | 0.185792000  | -2.353238000 |
| H | -4.737909000 | -1.980509000 | 0.785077000  |
| H | -5.503405000 | -1.769868000 | -1.478754000 |
| H | -6.750843000 | -1.368284000 | 1.347861000  |
| H | -2.071662000 | -1.351709000 | -1.663355000 |
| C | 4.291866000  | -0.704529000 | 1.536621000  |
| C | 0.532583000  | -2.718331000 | 1.524219000  |
| H | -3.647938000 | -0.107575000 | 2.893562000  |
| H | -2.276172000 | -1.982838000 | 2.422060000  |
| H | -2.551595000 | 0.995917000  | 2.089334000  |
| H | -1.801817000 | -1.361964000 | 0.863570000  |
| H | 1.866188000  | 0.266626000  | 2.390480000  |
| H | 3.805961000  | -3.203779000 | 0.791845000  |
| H | 1.627715000  | -4.388358000 | 0.740832000  |
| H | -0.415057000 | -3.236603000 | 1.475589000  |
| O | -3.288946000 | 0.382202000  | -0.378217000 |
| C | -5.015101000 | -0.952991000 | 0.520098000  |
| C | -5.195982000 | -0.829787000 | -1.015365000 |
| C | -3.790643000 | -0.441272000 | -1.459426000 |
| C | -3.908437000 | 0.011537000  | 0.795180000  |
| H | 5.098869000  | 0.989698000  | 1.760416000  |

### 8B-RC-complex

|   |              |             |              |
|---|--------------|-------------|--------------|
| N | -0.655148000 | 1.625527000 | 0.218277000  |
| N | -0.738151000 | 1.125778000 | 2.403553000  |
| N | -4.366564000 | 1.462484000 | 1.741277000  |
| N | -3.043398000 | 1.859595000 | -0.224904000 |
| N | -3.463372000 | 0.898623000 | 3.802703000  |
| C | -0.117783000 | 1.954590000 | -1.106951000 |
| C | -0.245449000 | 3.449450000 | -1.406423000 |
| C | 1.084712000  | 3.986943000 | -0.852822000 |
| C | 2.063216000  | 2.845234000 | -1.214802000 |
| C | 3.254020000  | 2.721365000 | -0.357736000 |
| C | 0.039410000  | 1.307141000 | 1.363565000  |

|   |              |              |              |
|---|--------------|--------------|--------------|
| C | -2.015482000 | 1.330253000  | 1.920980000  |
| C | -1.985599000 | 1.633306000  | 0.561871000  |
| C | -3.288150000 | 1.236702000  | 2.511647000  |
| C | -4.187427000 | 1.752672000  | 0.447473000  |
| O | -0.308273000 | 3.611425000  | -2.811295000 |
| O | 1.505359000  | 5.184459000  | -1.477610000 |
| O | 1.254972000  | 1.646225000  | -1.138708000 |
| H | -0.655340000 | 1.357571000  | -1.844250000 |
| H | 0.112432000  | 4.459346000  | -3.017295000 |
| H | -1.117865000 | 3.888919000  | -0.917194000 |
| H | 1.132939000  | 5.937577000  | -1.003849000 |
| H | 1.019319000  | 4.103594000  | 0.231038000  |
| H | 2.356551000  | 3.003401000  | -2.259404000 |
| H | 3.223311000  | 2.115852000  | 0.536542000  |
| H | 4.133581000  | 3.309265000  | -0.574133000 |
| H | -2.671292000 | 0.807988000  | 4.414468000  |
| H | -4.387179000 | 0.911190000  | 4.199806000  |
| H | 1.108152000  | 1.181019000  | 1.347390000  |
| H | -5.094650000 | 1.916868000  | -0.123981000 |
| O | 3.253019000  | -2.380911000 | 2.489573000  |
| O | 5.329201000  | -1.333493000 | -1.191896000 |
| C | 2.028169000  | -1.533675000 | -1.133365000 |
| C | 1.623863000  | -2.950488000 | -0.687051000 |
| C | 0.261949000  | -3.284489000 | -1.254081000 |
| C | -3.337865000 | -2.261479000 | -0.700065000 |
| C | -2.111238000 | -1.861083000 | 1.349540000  |
| O | 0.171452000  | -3.928938000 | -2.288770000 |
| H | 5.971058000  | 0.082993000  | 0.309523000  |
| O | -4.597885000 | -2.621496000 | -2.686554000 |
| O | 5.549908000  | 0.024410000  | 1.179905000  |
| H | 3.379336000  | 0.068443000  | -0.758537000 |
| C | -0.958168000 | -2.756348000 | -0.573445000 |
| O | -5.655767000 | -1.767895000 | -0.899742000 |
| C | -2.164877000 | -2.729473000 | -1.281149000 |
| C | -3.298994000 | -1.836121000 | 0.629573000  |
| H | 3.643547000  | -0.368357000 | 2.795824000  |
| H | 4.250614000  | -2.762589000 | -0.137419000 |
| H | 5.577016000  | -1.983060000 | 1.718891000  |
| H | 5.996441000  | -2.024363000 | -1.281057000 |
| H | 2.423475000  | -2.299818000 | 2.975904000  |
| C | -4.645940000 | -2.213034000 | -1.500165000 |
| C | -0.938929000 | -2.300554000 | 0.749807000  |
| H | 2.342177000  | -1.551886000 | -2.179619000 |
| H | 2.327686000  | -3.690848000 | -1.065138000 |
| H | 1.170871000  | -0.862574000 | -1.077884000 |
| H | 1.630296000  | -3.000138000 | 0.401065000  |

|   |              |              |              |
|---|--------------|--------------|--------------|
| H | -2.188230000 | -3.070468000 | -2.305992000 |
| H | -4.209809000 | -1.470344000 | 1.082604000  |
| H | -2.092089000 | -1.520560000 | 2.375752000  |
| H | -0.020925000 | -2.290719000 | 1.318916000  |
| O | 2.665633000  | -0.645262000 | 1.035234000  |
| C | 4.432716000  | -1.687305000 | -0.145537000 |
| C | 4.923455000  | -1.246492000 | 1.245368000  |
| C | 3.603965000  | -1.106668000 | 1.992270000  |
| C | 3.131802000  | -0.895839000 | -0.307698000 |

### 8B-PC-complex

|   |           |           |           |
|---|-----------|-----------|-----------|
| N | -0.561049 | 1.904345  | 0.117935  |
| N | -1.463921 | 2.019731  | 2.169156  |
| N | -4.460820 | 0.954514  | 0.272731  |
| N | -2.533232 | 1.203733  | -1.139293 |
| N | -4.443255 | 1.368645  | 2.557238  |
| C | 0.426912  | 1.952037  | -0.941530 |
| C | 0.852769  | 3.370355  | -1.374483 |
| C | 2.272397  | 3.490852  | -0.786350 |
| C | 2.765364  | 2.047527  | -0.834938 |
| C | 3.882849  | 1.701595  | 0.116757  |
| C | -0.375012 | 2.161968  | 1.456934  |
| C | -2.428158 | 1.645237  | 1.252537  |
| C | -1.885176 | 1.562512  | -0.027799 |
| C | -3.788882 | 1.314892  | 1.378436  |
| C | -3.809206 | 0.913867  | -0.894353 |
| O | 0.898395  | 3.406344  | -2.791702 |
| O | 3.121159  | 4.322309  | -1.562808 |
| O | 1.593885  | 1.284298  | -0.489661 |
| H | -0.021723 | 1.442963  | -1.796434 |
| H | 1.663440  | 3.952346  | -3.030218 |
| H | 0.164496  | 4.127376  | -0.990668 |
| H | 3.036282  | 5.234787  | -1.262181 |
| H | 2.222623  | 3.837081  | 0.249383  |
| H | 3.062313  | 1.816644  | -1.862611 |
| H | 3.589409  | 1.907079  | 1.147944  |
| H | 4.763715  | 2.298144  | -0.125090 |
| H | -3.914907 | 1.467484  | 3.407457  |
| H | -5.355927 | 0.948685  | 2.618232  |
| H | 0.593776  | 2.432909  | 1.843155  |
| H | -4.400552 | 0.602912  | -1.748877 |
| O | 5.643539  | -1.831817 | -3.216520 |
| O | 2.797545  | 0.879224  | -5.220336 |
| C | 1.479489  | -0.967451 | -3.032505 |
| C | 1.330852  | -2.477241 | -2.684757 |
| C | -0.102146 | -2.814434 | -2.337566 |

|   |           |           |           |
|---|-----------|-----------|-----------|
| C | -2.569847 | -2.307686 | 0.484438  |
| C | -0.422148 | -1.438710 | 1.192506  |
| O | -0.808950 | -3.379407 | -3.161545 |
| H | 4.203272  | 2.022353  | -4.275645 |
| O | -4.749431 | -2.959654 | -0.209367 |
| O | 4.932143  | 1.614323  | -3.781324 |
| H | 4.144511  | 0.648102  | 0.022342  |
| C | -0.649050 | -2.408999 | -1.008559 |
| O | -4.430430 | -2.462352 | 1.956464  |
| C | -2.001642 | -2.645787 | -0.737286 |
| C | -1.762073 | -1.701420 | 1.449550  |
| H | 5.712772  | -0.083917 | -2.096723 |
| H | 3.584464  | -1.033424 | -5.294699 |
| H | 5.702762  | 0.015171  | -4.856595 |
| H | 2.963414  | 0.843025  | -6.171298 |
| H | 5.783575  | -2.355259 | -2.417635 |
| C | -4.047485 | -2.599809 | 0.768149  |
| C | 0.138345  | -1.794329 | -0.027063 |
| H | 0.869363  | -0.726220 | -3.903991 |
| H | 1.617158  | -3.083269 | -3.543304 |
| H | 1.095468  | -0.385134 | -2.193254 |
| H | 2.001376  | -2.712715 | -1.857847 |
| H | -2.621770 | -3.104067 | -1.493764 |
| H | -2.204000 | -1.432434 | 2.398971  |
| H | 0.187621  | -0.948125 | 1.940170  |
| H | 1.181012  | -1.576690 | -0.204881 |
| O | 3.793699  | -0.738434 | -2.305546 |
| C | 3.510952  | -0.194417 | -4.590478 |
| C | 4.926027  | 0.240853  | -4.123357 |
| C | 5.114324  | -0.587741 | -2.856282 |
| C | 2.868857  | -0.564903 | -3.305721 |

### 9-RC-complex

|   |              |              |              |
|---|--------------|--------------|--------------|
| H | -3.034081000 | -0.941796000 | -0.960465000 |
| C | -2.334284000 | -0.577272000 | -4.220636000 |
| H | -1.249818000 | -0.600555000 | -4.149879000 |
| H | -2.666540000 | -1.229353000 | -5.023978000 |
| H | -2.628276000 | 0.447227000  | -4.460155000 |
| C | -3.030374000 | -1.000854000 | -2.949175000 |
| H | 0.237966000  | -1.043789000 | -2.586736000 |
| H | -1.335578000 | 0.383171000  | -0.417899000 |
| H | -1.825288000 | 3.128515000  | -2.703989000 |
| H | -0.326144000 | -1.841160000 | -1.120688000 |
| O | -4.081501000 | -1.639249000 | -2.982348000 |
| C | -1.052534000 | 1.346329000  | -2.277474000 |
| C | -1.241269000 | 0.055617000  | -1.455902000 |

|   |              |              |              |
|---|--------------|--------------|--------------|
| N | -2.501009000 | -0.623825000 | -1.756621000 |
| C | -0.027747000 | -0.879527000 | -1.542138000 |
| O | -0.060661000 | 1.515340000  | -2.984209000 |
| N | -2.012501000 | 2.283618000  | -2.176927000 |
| C | 1.170625000  | -0.331023000 | -0.777678000 |
| H | 1.453085000  | 0.643948000  | -1.170651000 |
| H | 0.921959000  | -0.220238000 | 0.279964000  |
| S | 2.602470000  | -1.451466000 | -0.920785000 |
| C | 3.801092000  | -0.507800000 | 0.064393000  |
| H | 4.736755000  | -1.065078000 | 0.060943000  |
| H | 3.970740000  | 0.476035000  | -0.373876000 |
| H | 3.455641000  | -0.397755000 | 1.092450000  |
| C | -3.162108000 | 2.300794000  | -1.285299000 |
| H | -3.963279000 | 1.652261000  | -1.639058000 |
| H | -2.884428000 | 2.000569000  | -0.274659000 |
| H | -3.535899000 | 3.321228000  | -1.239093000 |
| N | -0.846528000 | 4.737905000  | -0.218900000 |
| N | -2.427405000 | 5.910718000  | 0.862631000  |
| N | -3.303291000 | 6.829979000  | -2.619028000 |
| N | -1.427217000 | 5.332400000  | -2.517735000 |
| N | -4.417835000 | 7.612793000  | -0.743340000 |
| C | 0.308437000  | 3.878690000  | -0.442113000 |
| C | 1.641910000  | 4.517258000  | -0.030164000 |
| C | 1.874757000  | 3.929718000  | 1.372867000  |
| C | 1.282694000  | 2.511629000  | 1.215611000  |
| C | 0.846619000  | 1.846967000  | 2.452867000  |
| C | -1.413791000 | 5.093252000  | 0.985870000  |
| C | -2.542323000 | 6.113794000  | -0.498848000 |
| C | -1.571919000 | 5.391520000  | -1.187966000 |
| C | -3.439925000 | 6.867665000  | -1.280433000 |
| C | -2.333972000 | 6.078910000  | -3.148536000 |
| O | 2.636140000  | 4.058748000  | -0.929029000 |
| O | 3.244426000  | 3.834870000  | 1.712825000  |
| O | 0.158426000  | 2.697397000  | 0.330397000  |
| H | 0.322933000  | 3.640499000  | -1.504829000 |
| H | 3.462216000  | 3.993311000  | -0.426442000 |
| H | 1.583010000  | 5.608811000  | -0.029853000 |
| H | 3.522724000  | 4.649040000  | 2.148842000  |
| H | 1.319504000  | 4.497035000  | 2.122137000  |
| H | 2.051379000  | 1.915867000  | 0.711513000  |
| H | -0.147169000 | 2.025999000  | 2.838506000  |
| H | 1.553029000  | 1.274473000  | 3.035056000  |
| H | -4.551003000 | 7.643253000  | 0.252184000  |
| H | -5.049619000 | 8.118443000  | -1.340335000 |
| H | -1.046525000 | 4.696777000  | 1.917765000  |
| H | -2.282212000 | 6.074587000  | -4.231882000 |

### 9-PC-complex

|   |              |              |              |
|---|--------------|--------------|--------------|
| H | -1.872730000 | -1.073442000 | -0.529076000 |
| C | -3.858341000 | -0.616347000 | -3.187522000 |
| H | -3.048779000 | -0.730472000 | -3.907853000 |
| H | -4.685633000 | -1.271581000 | -3.447755000 |
| H | -4.202177000 | 0.417666000  | -3.235863000 |
| C | -3.419562000 | -0.955665000 | -1.788867000 |
| H | 0.417069000  | -1.268879000 | -2.736170000 |
| H | -0.282221000 | 0.099220000  | 1.648891000  |
| H | -2.483204000 | 2.859456000  | -3.188765000 |
| H | 0.304357000  | -1.059827000 | -1.006958000 |
| O | -4.150433000 | -1.528459000 | -0.990653000 |
| C | -1.400180000 | 1.215864000  | -2.919609000 |
| C | -1.132195000 | 0.042595000  | -2.083056000 |
| N | -2.131461000 | -0.633470000 | -1.405495000 |
| C | 0.253143000  | -0.514936000 | -1.955385000 |
| O | -0.758067000 | 1.386600000  | -3.968452000 |
| N | -2.347687000 | 2.108337000  | -2.529581000 |
| C | 1.366578000  | 0.531119000  | -2.000803000 |
| H | 1.515874000  | 0.892153000  | -3.015462000 |
| H | 1.097616000  | 1.373934000  | -1.369058000 |
| S | 2.927072000  | -0.179169000 | -1.376978000 |
| C | 3.990140000  | 1.284509000  | -1.539447000 |
| H | 4.981229000  | 1.004071000  | -1.185041000 |
| H | 4.058847000  | 1.595176000  | -2.582119000 |
| H | 3.609455000  | 2.105501000  | -0.931986000 |
| C | -2.968964000 | 2.247379000  | -1.220117000 |
| H | -3.877320000 | 1.648275000  | -1.124985000 |
| H | -2.271202000 | 1.968133000  | -0.434109000 |
| H | -3.239109000 | 3.291765000  | -1.080823000 |
| N | -0.584033000 | 4.622197000  | -0.192448000 |
| N | -2.475229000 | 5.755286000  | 0.228859000  |
| N | -2.200699000 | 6.413013000  | -3.408133000 |
| N | -0.391518000 | 5.059978000  | -2.588465000 |
| N | -3.906771000 | 7.221834000  | -2.061260000 |
| C | 0.539141000  | 3.733537000  | 0.004377000  |
| C | 1.554820000  | 4.175959000  | 1.077456000  |
| C | 1.318113000  | 3.161664000  | 2.215849000  |
| C | 0.846729000  | 1.920753000  | 1.462060000  |
| C | 0.024245000  | 0.943894000  | 2.265631000  |
| C | -1.528477000 | 5.007940000  | 0.733567000  |
| C | -2.147679000 | 5.870149000  | -1.109851000 |
| C | -0.977734000 | 5.170397000  | -1.392943000 |
| C | -2.772408000 | 6.515355000  | -2.194714000 |
| C | -1.069263000 | 5.709909000  | -3.532114000 |



|   |              |             |              |
|---|--------------|-------------|--------------|
| O | 2.858014000  | 4.025215000 | 0.539410000  |
| O | 2.498089000  | 2.872044000 | 2.946935000  |
| O | 0.038376000  | 2.461087000 | 0.402821000  |
| H | 1.044750000  | 3.670560000 | -0.960189000 |
| H | 3.424382000  | 3.720478000 | 1.265453000  |
| H | 1.385113000  | 5.209545000 | 1.388417000  |
| H | 2.573365000  | 3.483247000 | 3.689139000  |
| H | 0.523436000  | 3.517745000 | 2.876341000  |
| H | 1.723927000  | 1.418890000 | 1.035113000  |
| H | -0.867383000 | 1.432332000 | 2.662439000  |
| H | 0.619450000  | 0.563307000 | 3.096866000  |
| H | -4.370009000 | 7.282807000 | -1.171716000 |
| H | -4.337889000 | 7.636148000 | -2.869687000 |
| H | -1.466210000 | 4.693755000 | 1.763000000  |
| H | -0.656056000 | 5.662919000 | -4.533995000 |

### 10A-RC-complex

|   |              |              |              |
|---|--------------|--------------|--------------|
| C | -0.375432000 | 0.630114000  | 1.764808000  |
| C | 0.461811000  | 0.814709000  | 0.512793000  |
| O | 0.080264000  | 1.828929000  | -0.264008000 |
| C | -1.118722000 | -0.731636000 | 1.660308000  |
| C | -2.082837000 | -0.834329000 | 0.518018000  |
| C | -1.797179000 | -1.279444000 | -0.747256000 |
| C | -3.472992000 | -0.465402000 | 0.508593000  |
| N | -2.918397000 | -1.203338000 | -1.541706000 |
| C | -3.964615000 | -0.712351000 | -0.800988000 |
| C | -4.353785000 | 0.037686000  | 1.476746000  |
| C | -5.290739000 | -0.466486000 | -1.157242000 |
| C | -5.671596000 | 0.280807000  | 1.127435000  |
| C | -6.135382000 | 0.032826000  | -0.178472000 |
| O | 1.391648000  | 0.084556000  | 0.229902000  |
| H | -1.642709000 | -0.891307000 | 2.605592000  |
| H | -0.366947000 | -1.517825000 | 1.576928000  |
| H | -0.866489000 | -1.647852000 | -1.146902000 |
| H | -4.007351000 | 0.237018000  | 2.482721000  |
| H | -6.359732000 | 0.669690000  | 1.867580000  |
| H | -5.645619000 | -0.659773000 | -2.161766000 |
| H | -7.170885000 | 0.235404000  | -0.422229000 |
| H | 0.353820000  | 0.522088000  | 2.573046000  |
| H | -2.965209000 | -1.486302000 | -2.505271000 |
| C | -1.303687000 | 1.798821000  | 2.082690000  |
| H | -2.061251000 | 1.924555000  | 1.310578000  |
| H | -1.810762000 | 1.617354000  | 3.031686000  |
| H | -0.745933000 | 2.731649000  | 2.166844000  |
| H | 0.677413000  | 1.894355000  | -1.051121000 |
| N | 3.018811000  | 5.430822000  | -0.983759000 |

|   |             |              |              |
|---|-------------|--------------|--------------|
| N | 4.326601000 | 7.223116000  | -0.649529000 |
| N | 1.713830000 | 8.784816000  | -2.762973000 |
| N | 1.293517000 | 6.450459000  | -2.373587000 |
| N | 3.553669000 | 9.917517000  | -1.919850000 |
| C | 2.502278000 | 4.061962000  | -0.918128000 |
| C | 2.745650000 | 3.300034000  | -2.224299000 |
| C | 4.077157000 | 2.588786000  | -1.938267000 |
| C | 3.943597000 | 2.252454000  | -0.435673000 |
| C | 5.209808000 | 2.105287000  | 0.298744000  |
| C | 4.152728000 | 5.948803000  | -0.401050000 |
| C | 3.248875000 | 7.570415000  | -1.440210000 |
| C | 2.422718000 | 6.470221000  | -1.656610000 |
| C | 2.847635000 | 8.780334000  | -2.038867000 |
| C | 1.018212000 | 7.648496000  | -2.885378000 |
| O | 1.705859000 | 2.339316000  | -2.393969000 |
| O | 4.227139000 | 1.392612000  | -2.678329000 |
| O | 3.171852000 | 3.360858000  | 0.102851000  |
| H | 1.436048000 | 4.129591000  | -0.697317000 |
| H | 2.104697000 | 1.563447000  | -2.821077000 |
| H | 2.784385000 | 3.967197000  | -3.086107000 |
| H | 4.662391000 | 1.587373000  | -3.516891000 |
| H | 4.910705000 | 3.273391000  | -2.106249000 |
| H | 3.341559000 | 1.341840000  | -0.359281000 |
| H | 5.754178000 | 2.981082000  | 0.623676000  |
| H | 5.658432000 | 1.129944000  | 0.413805000  |
| H | 4.381664000 | 9.948312000  | -1.351647000 |
| H | 3.209701000 | 10.766886000 | -2.333731000 |
| H | 4.795393000 | 5.334099000  | 0.204926000  |
| H | 0.113558000 | 7.717114000  | -3.480340000 |

### 10A-PC-complex

|   |              |              |              |
|---|--------------|--------------|--------------|
| C | -0.143582000 | 0.053099000  | 1.647108000  |
| C | 0.605113000  | 0.511472000  | 0.408120000  |
| O | 0.118750000  | 1.614464000  | -0.156731000 |
| C | -0.970107000 | -1.232645000 | 1.242423000  |
| C | -1.962845000 | -1.017391000 | 0.148781000  |
| C | -1.768582000 | -1.283277000 | -1.182510000 |
| C | -3.280614000 | -0.452458000 | 0.257955000  |
| N | -2.879382000 | -0.916188000 | -1.906227000 |
| C | -3.826637000 | -0.406246000 | -1.052407000 |
| C | -4.056534000 | 0.008762000  | 1.330640000  |
| C | -5.106223000 | 0.085999000  | -1.308687000 |
| C | -5.328081000 | 0.498053000  | 1.080068000  |
| C | -5.847256000 | 0.537453000  | -0.227627000 |
| O | 1.546672000  | -0.105813000 | -0.048218000 |
| H | -1.464223000 | -1.587764000 | 2.148664000  |

|   |              |              |              |
|---|--------------|--------------|--------------|
| H | -0.248526000 | -1.994924000 | 0.944050000  |
| H | -0.909056000 | -1.708675000 | -1.674527000 |
| H | -3.664171000 | -0.014722000 | 2.339286000  |
| H | -5.935935000 | 0.857501000  | 1.901000000  |
| H | -5.504253000 | 0.113743000  | -2.315193000 |
| H | -6.844258000 | 0.926518000  | -0.391943000 |
| H | 0.623824000  | -0.312832000 | 2.335080000  |
| H | -2.986123000 | -1.027569000 | -2.899625000 |
| C | -0.961771000 | 1.090950000  | 2.318370000  |
| H | -1.453568000 | 1.868917000  | 1.756050000  |
| H | -1.221868000 | 0.959189000  | 3.359477000  |
| H | 5.253262000  | 1.899083000  | 0.986092000  |
| H | 0.637276000  | 1.834151000  | -0.972924000 |
| N | 2.775971000  | 5.489636000  | -0.769157000 |
| N | 4.032880000  | 7.321724000  | -0.456350000 |
| N | 1.016705000  | 8.915293000  | -1.903898000 |
| N | 0.787417000  | 6.529331000  | -1.724623000 |
| N | 2.918909000  | 10.075684000 | -1.259564000 |
| C | 2.354246000  | 4.087853000  | -0.787534000 |
| C | 2.490194000  | 3.468652000  | -2.183336000 |
| C | 3.874086000  | 2.803322000  | -2.104513000 |
| C | 3.927450000  | 2.337625000  | -0.649902000 |
| C | 5.310264000  | 2.201152000  | -0.059886000 |
| C | 3.968031000  | 6.019342000  | -0.331451000 |
| C | 2.817413000  | 7.675828000  | -1.008643000 |
| C | 2.021537000  | 6.550450000  | -1.209110000 |
| C | 2.258197000  | 8.911863000  | -1.386134000 |
| C | 0.367987000  | 7.753064000  | -2.039914000 |
| O | 1.481361000  | 2.472213000  | -2.344180000 |
| O | 3.991476000  | 1.685666000  | -2.969284000 |
| O | 3.179716000  | 3.345318000  | 0.077889000  |
| H | 1.317223000  | 4.062297000  | -0.449121000 |
| H | 1.876328000  | 1.755962000  | -2.868557000 |
| H | 2.404637000  | 4.215835000  | -2.972709000 |
| H | 4.301430000  | 1.981257000  | -3.833673000 |
| H | 4.653288000  | 3.543076000  | -2.303394000 |
| H | 3.385395000  | 1.391001000  | -0.574145000 |
| H | 5.861742000  | 3.140402000  | -0.125509000 |
| H | 5.861885000  | 1.435198000  | -0.607594000 |
| H | 3.821322000  | 10.104097000 | -0.818520000 |
| H | 2.457431000  | 10.939678000 | -1.486692000 |
| H | 4.736069000  | 5.389610000  | 0.083290000  |
| H | -0.628710000 | 7.821983000  | -2.462733000 |

**10B-RC-complex**

|   |              |             |              |
|---|--------------|-------------|--------------|
| C | -0.475599000 | 4.815675000 | -0.961953000 |
|---|--------------|-------------|--------------|

|   |              |              |              |
|---|--------------|--------------|--------------|
| C | 0.029801000  | 5.677082000  | 0.224687000  |
| O | 1.273337000  | 5.838256000  | 0.356441000  |
| C | -1.338780000 | 3.642428000  | -0.437080000 |
| C | -0.614022000 | 2.649110000  | 0.421368000  |
| C | -0.457726000 | 2.707853000  | 1.781744000  |
| C | 0.058151000  | 1.450173000  | -0.003487000 |
| N | 0.263572000  | 1.620631000  | 2.227674000  |
| C | 0.596108000  | 0.831094000  | 1.157244000  |
| C | 0.261013000  | 0.837709000  | -1.248288000 |
| C | 1.323907000  | -0.357065000 | 1.098792000  |
| C | 0.981385000  | -0.343931000 | -1.310465000 |
| C | 1.510125000  | -0.935190000 | -0.147239000 |
| O | -0.853743000 | 6.159339000  | 0.975813000  |
| H | -1.774408000 | 3.122704000  | -1.296057000 |
| H | -2.165629000 | 4.070980000  | 0.130275000  |
| H | -0.807374000 | 3.455793000  | 2.473749000  |
| H | -0.134044000 | 1.288063000  | -2.150107000 |
| H | 1.145556000  | -0.822707000 | -2.267921000 |
| H | 1.731944000  | -0.807605000 | 1.995007000  |
| H | 2.072606000  | -1.856954000 | -0.227697000 |
| H | -1.160065000 | 5.465332000  | -1.519777000 |
| H | 0.524046000  | 1.450475000  | 3.183338000  |
| C | 0.626650000  | 4.354098000  | -1.909444000 |
| H | 1.351437000  | 3.723981000  | -1.394512000 |
| H | 0.204478000  | 3.778592000  | -2.737780000 |
| H | 1.165948000  | 5.203457000  | -2.327255000 |
| N | 4.988839000  | 6.074983000  | -1.281996000 |
| N | 3.531086000  | 7.038297000  | -2.687327000 |
| N | 6.660723000  | 7.697859000  | -4.559133000 |
| N | 7.058824000  | 6.502879000  | -2.512212000 |
| N | 4.549077000  | 8.339558000  | -5.278494000 |
| C | 5.502351000  | 5.365524000  | -0.127483000 |
| C | 5.259300000  | 6.075238000  | 1.216695000  |
| C | 4.125401000  | 5.246468000  | 1.842323000  |
| C | 4.413942000  | 3.834164000  | 1.301191000  |
| C | 3.247635000  | 2.935469000  | 1.279907000  |
| C | 3.674134000  | 6.390194000  | -1.556520000 |
| C | 4.813719000  | 7.159685000  | -3.187911000 |
| C | 5.735572000  | 6.565204000  | -2.329135000 |
| C | 5.332157000  | 7.748113000  | -4.355447000 |
| C | 7.429353000  | 7.090209000  | -3.647693000 |
| O | 6.442120000  | 5.973833000  | 1.994779000  |
| O | 4.177900000  | 5.243251000  | 3.262861000  |
| O | 4.869806000  | 4.092384000  | -0.052562000 |
| H | 6.575214000  | 5.256051000  | -0.290356000 |
| H | 6.153496000  | 5.883662000  | 2.916211000  |

|   |             |             |              |
|---|-------------|-------------|--------------|
| H | 4.983801000 | 7.122927000 | 1.069029000  |
| H | 3.600777000 | 5.938441000 | 3.598755000  |
| H | 3.153954000 | 5.582893000 | 1.476953000  |
| H | 5.236127000 | 3.403321000 | 1.883022000  |
| H | 2.373994000 | 3.214800000 | 0.707589000  |
| H | 3.214819000 | 2.048284000 | 1.892467000  |
| H | 3.571947000 | 8.482724000 | -5.091722000 |
| H | 4.974224000 | 8.838611000 | -6.041184000 |
| H | 2.863972000 | 6.103870000 | -0.893620000 |
| H | 8.492090000 | 7.079227000 | -3.866270000 |

### 10B-PC-complex

|   |              |              |              |
|---|--------------|--------------|--------------|
| C | 2.255294000  | 2.930684000  | 0.502685000  |
| C | 1.718607000  | 3.716065000  | 1.729532000  |
| O | 1.165634000  | 3.081918000  | 2.657647000  |
| C | 1.355367000  | 3.243112000  | -0.747923000 |
| C | -0.088811000 | 2.885891000  | -0.608722000 |
| C | -1.104607000 | 3.741851000  | -0.272166000 |
| C | -0.695555000 | 1.591221000  | -0.766189000 |
| N | -2.302010000 | 3.061320000  | -0.204560000 |
| C | -2.085094000 | 1.740178000  | -0.506561000 |
| C | -0.206694000 | 0.323665000  | -1.112485000 |
| C | -2.975299000 | 0.668641000  | -0.579225000 |
| C | -1.087956000 | -0.743076000 | -1.186918000 |
| C | -2.459610000 | -0.572294000 | -0.920788000 |
| O | 1.886046000  | 4.966347000  | 1.684786000  |
| H | 1.786936000  | 2.718644000  | -1.605498000 |
| H | 1.444706000  | 4.311230000  | -0.947456000 |
| H | -1.063719000 | 4.799252000  | -0.067575000 |
| H | 0.847664000  | 0.183121000  | -1.312776000 |
| H | -0.719559000 | -1.726258000 | -1.452597000 |
| H | -4.030516000 | 0.802675000  | -0.376184000 |
| H | -3.124116000 | -1.424885000 | -0.985195000 |
| H | 3.224932000  | 3.373311000  | 0.251022000  |
| H | -3.193497000 | 3.474980000  | 0.006254000  |
| C | 2.440623000  | 1.480439000  | 0.736391000  |
| H | 1.875535000  | 0.967661000  | 1.500028000  |
| H | 3.047268000  | 0.895909000  | 0.055273000  |
| H | 5.127306000  | 2.880212000  | 2.159251000  |
| N | 4.691313000  | 6.188480000  | -1.304994000 |
| N | 2.576730000  | 6.907650000  | -1.494947000 |
| N | 3.924161000  | 8.216461000  | -4.688490000 |
| N | 5.590978000  | 7.052692000  | -3.405854000 |
| N | 1.721179000  | 8.467093000  | -4.002147000 |
| C | 5.905062000  | 5.611309000  | -0.740440000 |
| C | 6.682382000  | 6.590669000  | 0.155575000  |

|   |             |             |              |
|---|-------------|-------------|--------------|
| C | 6.267845000 | 6.135604000 | 1.565074000  |
| C | 6.116271000 | 4.627473000 | 1.382389000  |
| C | 5.224951000 | 3.941853000 | 2.388697000  |
| C | 3.435313000 | 6.261408000 | -0.740920000 |
| C | 3.300726000 | 7.288333000 | -2.607147000 |
| C | 4.619680000 | 6.851390000 | -2.507505000 |
| C | 2.963935000 | 8.003659000 | -3.770883000 |
| C | 5.153100000 | 7.738584000 | -4.459277000 |
| O | 8.069421000 | 6.376972000 | -0.048535000 |
| O | 7.252530000 | 6.411373000 | 2.548602000  |
| O | 5.553160000 | 4.498607000 | 0.059535000  |
| H | 6.529869000 | 5.309560000 | -1.582458000 |
| H | 8.501607000 | 6.519363000 | 0.807229000  |
| H | 6.412208000 | 7.627833000 | -0.058365000 |
| H | 7.111561000 | 7.298854000 | 2.899343000  |
| H | 5.304538000 | 6.577241000 | 1.833706000  |
| H | 7.117309000 | 4.181080000 | 1.387141000  |
| H | 4.232303000 | 4.392030000 | 2.388679000  |
| H | 5.665685000 | 4.039681000 | 3.382376000  |
| H | 1.013726000 | 8.393578000 | -3.292252000 |
| H | 1.547282000 | 9.046573000 | -4.805323000 |
| H | 3.185690000 | 5.787315000 | 0.201053000  |
| H | 5.884331000 | 7.941134000 | -5.234877000 |

### 11A-RC-complex

|   |              |              |              |
|---|--------------|--------------|--------------|
| C | -2.960889000 | -1.127473000 | -0.265306000 |
| C | -3.003469000 | -0.690918000 | -1.713828000 |
| O | -2.713126000 | 0.588528000  | -1.879600000 |
| C | -1.485853000 | -1.031085000 | 0.236979000  |
| C | -0.468986000 | -1.625951000 | -0.691619000 |
| C | -0.176196000 | -2.952887000 | -0.876861000 |
| C | 0.361609000  | -0.899972000 | -1.618512000 |
| N | 0.771856000  | -3.095455000 | -1.865668000 |
| C | 1.125032000  | -1.855925000 | -2.338493000 |
| C | 0.544316000  | 0.461042000  | -1.902189000 |
| C | 2.039240000  | -1.488307000 | -3.326291000 |
| C | 1.458383000  | 0.829531000  | -2.873274000 |
| C | 2.195035000  | -0.136289000 | -3.583383000 |
| O | -3.233875000 | -1.448866000 | -2.642781000 |
| H | -1.447437000 | -1.515790000 | 1.214859000  |
| H | -1.244726000 | 0.020169000  | 0.396183000  |
| H | -0.570413000 | -3.820203000 | -0.373593000 |
| H | -0.038118000 | 1.211083000  | -1.383966000 |
| H | 1.596792000  | 1.877428000  | -3.107804000 |
| H | 2.600359000  | -2.234154000 | -3.875009000 |
| H | 2.885747000  | 0.183144000  | -4.353078000 |

|   |              |              |              |
|---|--------------|--------------|--------------|
| H | -3.540521000 | -0.399154000 | 0.308380000  |
| H | 1.159646000  | -3.970637000 | -2.172562000 |
| C | -3.556131000 | -2.517376000 | -0.076388000 |
| H | -2.987258000 | -3.263975000 | -0.630413000 |
| H | -3.544491000 | -2.786855000 | 0.980717000  |
| H | -4.586997000 | -2.554883000 | -0.430045000 |
| H | -2.500987000 | 0.789141000  | -2.850843000 |
| N | -0.382771000 | 2.676043000  | -5.321924000 |
| N | -1.782585000 | 1.265096000  | -4.307730000 |
| N | -0.049522000 | -1.130105000 | -6.550370000 |
| N | 0.750068000  | 1.118748000  | -6.810107000 |
| N | -1.716085000 | -1.746768000 | -5.064965000 |
| C | 0.322625000  | 3.908722000  | -5.683125000 |
| C | -0.202419000 | 4.516730000  | -6.987180000 |
| C | -1.240952000 | 5.525468000  | -6.468835000 |
| C | -0.570490000 | 6.029819000  | -5.170750000 |
| C | -1.482067000 | 6.567251000  | -4.148520000 |
| C | -1.369693000 | 2.508676000  | -4.392393000 |
| C | -1.022650000 | 0.567126000  | -5.229164000 |
| C | -0.144755000 | 1.435957000  | -5.870142000 |
| C | -0.942766000 | -0.792124000 | -5.599316000 |
| C | 0.725456000  | -0.184071000 | -7.085707000 |
| O | 0.872015000  | 5.184368000  | -7.622079000 |
| O | -1.448092000 | 6.611485000  | -7.350359000 |
| O | 0.121471000  | 4.861457000  | -4.663554000 |
| H | 1.380031000  | 3.658185000  | -5.775138000 |
| H | 0.494227000  | 5.940015000  | -8.096440000 |
| H | -0.638014000 | 3.756090000  | -7.640079000 |
| H | -2.145555000 | 6.384404000  | -7.976852000 |
| H | -2.177608000 | 5.014123000  | -6.235389000 |
| H | 0.169844000  | 6.782524000  | -5.464024000 |
| H | -2.020219000 | 5.893013000  | -3.496730000 |
| H | -1.712544000 | 7.621829000  | -4.128813000 |
| H | -2.301204000 | -1.560134000 | -4.255453000 |
| H | -1.527360000 | -2.703289000 | -5.314640000 |
| H | -1.725409000 | 3.325756000  | -3.790018000 |
| H | 1.425578000  | -0.524902000 | -7.841291000 |

### 11A-PC-complex

|   |              |              |              |
|---|--------------|--------------|--------------|
| C | -2.854471000 | -1.186055000 | -0.491948000 |
| C | -3.521363000 | -1.098678000 | -1.856481000 |
| O | -3.888273000 | 0.143991000  | -2.172157000 |
| C | -1.535368000 | -0.453930000 | -0.611893000 |
| C | -0.557636000 | -0.704204000 | -1.583064000 |
| C | -0.479063000 | -1.742703000 | -2.524987000 |
| C | 0.603935000  | 0.139906000  | -1.854774000 |

|   |              |              |              |
|---|--------------|--------------|--------------|
| N | 0.628840000  | -1.575779000 | -3.312869000 |
| C | 1.304820000  | -0.434059000 | -2.939080000 |
| C | 1.071425000  | 1.332375000  | -1.300572000 |
| C | 2.452314000  | 0.144496000  | -3.474056000 |
| C | 2.215422000  | 1.917396000  | -1.826490000 |
| C | 2.898970000  | 1.327069000  | -2.901247000 |
| O | -3.631029000 | -2.033594000 | -2.627556000 |
| H | -1.405895000 | 0.420056000  | 0.012065000  |
| H | -1.470313000 | 6.018232000  | -2.988091000 |
| H | -1.153296000 | -2.561421000 | -2.699127000 |
| H | 0.547013000  | 1.801246000  | -0.477334000 |
| H | 2.584226000  | 2.845216000  | -1.408430000 |
| H | 2.965762000  | -0.304188000 | -4.313919000 |
| H | 3.784424000  | 1.807576000  | -3.297530000 |
| H | -3.479802000 | -0.614106000 | 0.196884000  |
| H | 0.873981000  | -2.169101000 | -4.087401000 |
| C | -2.741957000 | -2.627680000 | 0.013067000  |
| H | -2.118381000 | -3.230564000 | -0.645037000 |
| H | -2.295774000 | -2.634214000 | 1.007699000  |
| H | -3.726303000 | -3.095327000 | 0.070992000  |
| H | -3.740604000 | 0.278923000  | -3.154186000 |
| N | -0.823152000 | 1.854222000  | -5.009040000 |
| N | -2.647422000 | 0.669726000  | -4.494932000 |
| N | -0.865048000 | -1.856300000 | -6.540716000 |
| N | 0.335462000  | 0.217623000  | -6.393230000 |
| N | -2.882992000 | -2.263691000 | -5.462075000 |
| C | 0.180295000  | 2.929994000  | -4.996266000 |
| C | 0.290411000  | 3.625849000  | -6.355297000 |
| C | -0.680344000 | 4.806418000  | -6.178894000 |
| C | -0.491817000 | 5.166506000  | -4.706135000 |
| C | -1.673708000 | 5.832623000  | -4.042995000 |
| C | -2.016650000 | 1.812674000  | -4.345361000 |
| C | -1.816216000 | -0.095467000 | -5.291909000 |
| C | -0.677773000 | 0.634571000  | -5.628809000 |
| C | -1.870743000 | -1.423209000 | -5.758966000 |
| C | 0.151140000  | -1.030608000 | -6.815548000 |
| O | 1.621531000  | 4.088969000  | -6.502338000 |
| O | -0.350846000 | 5.921758000  | -6.990751000 |
| O | -0.213349000 | 3.902433000  | -4.058160000 |
| H | 1.129431000  | 2.479971000  | -4.704493000 |
| H | 1.575332000  | 4.921390000  | -6.996095000 |
| H | 0.013262000  | 2.960024000  | -7.175466000 |
| H | -0.769658000 | 5.821637000  | -7.853928000 |
| H | -1.705910000 | 4.474603000  | -6.361540000 |
| H | 0.397855000  | 5.798722000  | -4.621349000 |
| H | -2.566951000 | 5.211303000  | -4.126012000 |



|   |              |              |              |
|---|--------------|--------------|--------------|
| H | -1.869196000 | 6.790288000  | -4.528304000 |
| H | -3.414470000 | -2.089108000 | -4.615870000 |
| H | -2.747746000 | -3.231185000 | -5.711378000 |
| H | -2.359452000 | 2.642307000  | -3.752664000 |
| H | 0.927124000  | -1.439626000 | -7.453650000 |

### 11B-RC-complex

|   |              |              |              |
|---|--------------|--------------|--------------|
| C | -2.613372000 | 0.686777000  | -0.313728000 |
| C | -3.619366000 | 0.587210000  | -1.494110000 |
| O | -3.802384000 | 1.648929000  | -2.150517000 |
| C | -1.212388000 | 1.101436000  | -0.801861000 |
| C | -0.490039000 | 0.156264000  | -1.716431000 |
| C | -0.967776000 | -0.936061000 | -2.389899000 |
| C | 0.870423000  | 0.327814000  | -2.153077000 |
| N | 0.011332000  | -1.453050000 | -3.215868000 |
| C | 1.146615000  | -0.691736000 | -3.102751000 |
| C | 1.866595000  | 1.268712000  | -1.862451000 |
| C | 2.371324000  | -0.781141000 | -3.761800000 |
| C | 3.086450000  | 1.183714000  | -2.515098000 |
| C | 3.335317000  | 0.168676000  | -3.457997000 |
| O | -4.177980000 | -0.515713000 | -1.713447000 |
| H | -0.583312000 | 1.292215000  | 0.075829000  |
| H | -1.302334000 | 2.057288000  | -1.324312000 |
| H | -1.953562000 | -1.367380000 | -2.370474000 |
| H | 1.676388000  | 2.064606000  | -1.153277000 |
| H | 3.860284000  | 1.911837000  | -2.305471000 |
| H | 2.555148000  | -1.553110000 | -4.498178000 |
| H | 4.294082000  | 0.132735000  | -3.960042000 |
| H | -2.972556000 | 1.530999000  | 0.285145000  |
| H | -0.118474000 | -2.218051000 | -3.854163000 |
| C | -2.586016000 | -0.546910000 | 0.586369000  |
| H | -2.242296000 | -1.429296000 | 0.048237000  |
| H | -1.915273000 | -0.384835000 | 1.435242000  |
| H | -3.580969000 | -0.766817000 | 0.975535000  |
| N | -0.701118000 | 1.289031000  | -5.187441000 |
| N | -2.443339000 | -0.107108000 | -5.394058000 |
| N | -0.160976000 | -1.648276000 | -7.872727000 |
| N | 0.801913000  | 0.292533000  | -6.832495000 |
| N | -2.270659000 | -2.470109000 | -7.355522000 |
| C | 0.139341000  | 2.402519000  | -4.729188000 |
| C | 0.204037000  | 3.515017000  | -5.777035000 |
| C | -0.993027000 | 4.389016000  | -5.368716000 |
| C | -0.945679000 | 4.286248000  | -3.826927000 |
| C | -2.224693000 | 4.475101000  | -3.120514000 |
| C | -1.968089000 | 0.946992000  | -4.771851000 |
| C | -1.434558000 | -0.487596000 | -6.256665000 |

|   |              |              |              |
|---|--------------|--------------|--------------|
| C | -0.341894000 | 0.370606000  | -6.142648000 |
| C | -1.305408000 | -1.545176000 | -7.173471000 |
| C | 0.804087000  | -0.743434000 | -7.667939000 |
| O | 1.422695000  | 4.216613000  | -5.601869000 |
| O | -0.856137000 | 5.743564000  | -5.759064000 |
| O | -0.422053000 | 2.966446000  | -3.570686000 |
| H | 1.127501000  | 2.000096000  | -4.507502000 |
| H | 1.251802000  | 5.140784000  | -5.836304000 |
| H | 0.117978000  | 3.122356000  | -6.793069000 |
| H | -1.207603000 | 5.853804000  | -6.650511000 |
| H | -1.920158000 | 3.956302000  | -5.750655000 |
| H | -0.206409000 | 5.028140000  | -3.493694000 |
| H | -2.780212000 | 3.616881000  | -2.763585000 |
| H | -2.616026000 | 5.476082000  | -3.004749000 |
| H | -3.176053000 | -2.333999000 | -6.940497000 |
| H | -2.182876000 | -3.129236000 | -8.110288000 |
| H | -2.472863000 | 1.481409000  | -3.981089000 |
| H | 1.701742000  | -0.875973000 | -8.262897000 |

#### **11B-PC-complex**

|   |              |              |              |
|---|--------------|--------------|--------------|
| C | -2.716190000 | 0.144120000  | -0.330988000 |
| C | -3.316251000 | 0.000340000  | -1.772216000 |
| O | -3.759186000 | 1.060761000  | -2.287632000 |
| C | -1.401704000 | 0.874130000  | -0.364223000 |
| C | -0.275455000 | 0.479882000  | -1.095060000 |
| C | -0.123315000 | -0.627653000 | -1.941393000 |
| C | 0.983861000  | 1.210107000  | -1.195239000 |
| N | 1.116061000  | -0.594976000 | -2.534499000 |
| C | 1.809537000  | 0.515175000  | -2.109728000 |
| C | 1.450479000  | 2.396781000  | -0.630367000 |
| C | 3.073114000  | 0.976316000  | -2.468382000 |
| C | 2.708911000  | 2.868271000  | -0.984249000 |
| C | 3.510726000  | 2.163580000  | -1.895723000 |
| O | -3.306891000 | -1.134701000 | -2.305730000 |
| H | -1.326480000 | 1.799141000  | 0.194936000  |
| H | -0.971501000 | 3.404239000  | -1.966398000 |
| H | -0.845917000 | -1.382958000 | -2.194516000 |
| H | 0.835541000  | 2.953782000  | 0.065855000  |
| H | 3.076128000  | 3.792720000  | -0.557105000 |
| H | 3.685857000  | 0.436108000  | -3.178718000 |
| H | 4.485561000  | 2.553335000  | -2.160390000 |
| H | -3.421591000 | 0.781617000  | 0.208175000  |
| H | 1.455105000  | -1.271880000 | -3.195638000 |
| C | -2.626187000 | -1.197616000 | 0.412520000  |
| H | -1.924510000 | -1.870033000 | -0.078146000 |
| H | -2.290936000 | -1.042418000 | 1.440774000  |

|   |              |              |              |
|---|--------------|--------------|--------------|
| H | -3.599779000 | -1.690962000 | 0.437897000  |
| N | -1.295199000 | 0.764106000  | -5.891896000 |
| N | -3.430701000 | 0.127172000  | -6.145323000 |
| N | -2.050131000 | -1.190386000 | -9.320389000 |
| N | -0.372569000 | -0.115102000 | -7.976004000 |
| N | -4.284089000 | -1.341813000 | -8.707521000 |
| C | -0.075448000 | 1.303204000  | -5.281040000 |
| C | 0.532791000  | 2.463491000  | -6.086203000 |
| C | 0.038185000  | 3.692135000  | -5.300943000 |
| C | -0.004179000 | 3.171698000  | -3.867174000 |
| C | -0.966569000 | 3.881099000  | -2.945555000 |
| C | -2.565342000 | 0.724718000  | -5.358825000 |
| C | -2.694621000 | -0.257454000 | -7.247514000 |
| C | -1.360750000 | 0.119962000  | -7.103241000 |
| C | -3.027084000 | -0.942824000 | -8.429987000 |
| C | -0.807681000 | -0.773282000 | -9.047758000 |
| O | 1.945909000  | 2.361464000  | -6.017528000 |
| O | 0.924396000  | 4.798415000  | -5.390455000 |
| O | -0.405888000 | 1.797224000  | -4.009550000 |
| H | 0.646699000  | 0.487457000  | -5.201346000 |
| H | 2.285493000  | 3.266752000  | -5.951102000 |
| H | 0.195723000  | 2.455722000  | -7.124208000 |
| H | 0.702154000  | 5.321330000  | -6.169667000 |
| H | -0.967139000 | 3.964325000  | -5.632879000 |
| H | 1.008743000  | 3.200199000  | -3.451665000 |
| H | -1.977861000 | 3.855527000  | -3.354654000 |
| H | -0.658600000 | 4.921601000  | -2.826803000 |
| H | -4.999899000 | -1.268948000 | -8.005504000 |
| H | -4.450863000 | -1.927599000 | -9.508041000 |
| H | -2.787685000 | 1.111865000  | -4.375054000 |
| H | -0.062259000 | -1.005046000 | -9.801261000 |

### 12A-RC-complex

|   |              |              |              |
|---|--------------|--------------|--------------|
| N | -2.946364000 | 0.930253000  | 1.118563000  |
| N | -3.031175000 | -0.832104000 | 2.504177000  |
| N | -5.274255000 | -2.083542000 | -0.165622000 |
| N | -4.436006000 | 0.118699000  | -0.639451000 |
| N | -4.745804000 | -3.269781000 | 1.756288000  |
| C | -2.614706000 | 2.239834000  | 0.584441000  |
| C | -3.364925000 | 3.401561000  | 1.253847000  |
| C | -2.315230000 | 3.964813000  | 2.227966000  |
| C | -1.001793000 | 3.746824000  | 1.446935000  |
| C | 0.219545000  | 3.684831000  | 2.265494000  |
| C | -2.524665000 | 0.357871000  | 2.300694000  |
| C | -3.835722000 | -1.062100000 | 1.404620000  |
| C | -3.794699000 | 0.019627000  | 0.529095000  |

|   |              |              |              |
|---|--------------|--------------|--------------|
| C | -4.622859000 | -2.160368000 | 1.008640000  |
| C | -5.146666000 | -0.975684000 | -0.904467000 |
| O | -3.676242000 | 4.354027000  | 0.253298000  |
| O | -2.491408000 | 5.342314000  | 2.492924000  |
| O | -1.225650000 | 2.474908000  | 0.783700000  |
| H | -2.851986000 | 2.211035000  | -0.478917000 |
| H | -3.654760000 | 5.224995000  | 0.677869000  |
| H | -4.268103000 | 3.052711000  | 1.761272000  |
| H | -3.069777000 | 5.449305000  | 3.257358000  |
| H | -2.300082000 | 3.378530000  | 3.149302000  |
| H | -0.932939000 | 4.536738000  | 0.691959000  |
| H | 0.426286000  | 2.798061000  | 2.850062000  |
| H | 0.840007000  | 4.561287000  | 2.374890000  |
| H | -4.230947000 | -3.367553000 | 2.613620000  |
| H | -5.280338000 | -4.049147000 | 1.412779000  |
| H | -1.798542000 | 0.839508000  | 2.935421000  |
| H | -5.694186000 | -0.973633000 | -1.840978000 |
| O | 2.702515000  | -1.874632000 | -0.674352000 |
| H | 2.701168000  | 1.892908000  | 0.127827000  |
| N | 0.457284000  | -2.028410000 | -0.656154000 |
| C | 1.487895000  | 0.153836000  | -0.151603000 |
| C | 2.406490000  | -0.875492000 | 2.589869000  |
| H | 3.710519000  | -0.217519000 | -2.176358000 |
| C | 1.202253000  | 0.011081000  | 2.387208000  |
| N | 0.831447000  | 0.377670000  | 1.135289000  |
| H | 3.240262000  | -0.242508000 | 2.901514000  |
| C | 1.604486000  | -1.341912000 | -0.514081000 |
| H | 0.073215000  | 1.051839000  | 1.108892000  |
| H | 0.817765000  | 0.603917000  | -0.885752000 |
| H | 0.585593000  | -3.009341000 | -0.856775000 |
| H | 2.187984000  | -1.561795000 | 3.405813000  |
| H | 3.591157000  | 0.383463000  | 0.347753000  |
| O | 0.561308000  | 0.418989000  | 3.358708000  |
| H | 2.713050000  | -1.435485000 | 1.711474000  |
| C | 2.832132000  | 0.879940000  | -0.250778000 |
| C | -0.908591000 | -1.556634000 | -0.478820000 |
| H | -1.167609000 | -1.463397000 | 0.575158000  |
| H | -1.061207000 | -0.595116000 | -0.966870000 |
| H | -1.579813000 | -2.275096000 | -0.943187000 |
| S | 3.450869000  | 1.081402000  | -1.958346000 |

### 12A-PC-complex

|   |              |              |              |
|---|--------------|--------------|--------------|
| N | -2.966656000 | 0.848746000  | 1.081634000  |
| N | -3.038465000 | -0.840721000 | 2.555174000  |
| N | -5.530327000 | -2.089879000 | 0.114278000  |
| N | -4.617302000 | 0.039388000  | -0.526213000 |

|   |              |              |              |
|---|--------------|--------------|--------------|
| N | -4.923006000 | -3.215444000 | 2.049175000  |
| C | -2.607012000 | 2.112927000  | 0.458488000  |
| C | -3.340065000 | 3.326256000  | 1.051553000  |
| C | -2.283038000 | 3.915384000  | 2.002451000  |
| C | -0.981709000 | 3.627819000  | 1.258175000  |
| C | 0.259014000  | 3.576058000  | 2.115292000  |
| C | -2.490677000 | 0.311818000  | 2.259096000  |
| C | -3.929217000 | -1.078792000 | 1.526376000  |
| C | -3.898531000 | -0.041204000 | 0.598340000  |
| C | -4.799341000 | -2.148859000 | 1.241888000  |
| C | -5.400118000 | -1.025706000 | -0.686021000 |
| O | -3.619568000 | 4.229765000  | -0.003555000 |
| O | -2.428353000 | 5.311926000  | 2.194003000  |
| O | -1.216373000 | 2.333881000  | 0.650730000  |
| H | -2.842962000 | 2.018504000  | -0.601598000 |
| H | -3.552427000 | 5.122779000  | 0.367071000  |
| H | -4.257119000 | 3.024881000  | 1.563788000  |
| H | -3.034523000 | 5.472204000  | 2.926988000  |
| H | -2.296784000 | 3.380999000  | 2.956257000  |
| H | -0.871025000 | 4.371703000  | 0.462713000  |
| H | 0.180302000  | 2.786593000  | 2.863505000  |
| H | 0.384004000  | 4.537171000  | 2.616479000  |
| H | -4.370022000 | -3.291975000 | 2.884539000  |
| H | -5.538842000 | -3.968759000 | 1.795789000  |
| H | -1.698531000 | 0.784314000  | 2.817393000  |
| H | -6.013874000 | -1.036748000 | -1.580502000 |
| O | 2.527441000  | -2.240332000 | -0.715734000 |
| H | 1.144839000  | 3.389968000  | 1.508640000  |
| N | 0.287296000  | -2.066349000 | -0.775636000 |
| C | 1.599069000  | -0.046654000 | -0.228996000 |
| C | 2.483379000  | -0.941664000 | 2.503860000  |
| H | 4.650070000  | 2.073931000  | -0.273616000 |
| C | 1.258809000  | -0.083620000 | 2.301697000  |
| N | 0.902860000  | 0.255210000  | 1.037339000  |
| H | 3.373894000  | -0.319121000 | 2.394330000  |
| C | 1.517552000  | -1.551416000 | -0.592503000 |
| H | 0.126337000  | 0.904462000  | 0.970793000  |
| H | 1.002703000  | 0.485969000  | -0.977906000 |
| H | 0.284127000  | -3.058158000 | -0.964228000 |
| H | 2.457723000  | -1.346834000 | 3.512067000  |
| H | 3.827806000  | -0.262158000 | -0.326924000 |
| O | 0.598989000  | 0.322524000  | 3.260283000  |
| H | 2.561917000  | -1.750187000 | 1.779487000  |
| C | 3.007718000  | 0.435120000  | -0.301159000 |
| C | -1.006685000 | -1.417316000 | -0.631789000 |
| H | -1.313334000 | -1.364544000 | 0.412324000  |

|   |              |              |              |
|---|--------------|--------------|--------------|
| H | -0.992021000 | -0.412022000 | -1.048888000 |
| H | -1.743238000 | -1.994808000 | -1.185830000 |
| S | 3.313908000  | 2.127553000  | -0.155609000 |

### 12B-RC-complex

|   |              |              |              |
|---|--------------|--------------|--------------|
| O | -1.462403000 | -2.810302000 | -0.300855000 |
| H | -4.503645000 | -0.192153000 | -0.253657000 |
| N | -1.156635000 | -2.104806000 | 1.815294000  |
| C | -2.483744000 | -0.704369000 | 0.270455000  |
| C | -2.743831000 | -1.217113000 | -2.791703000 |
| H | -5.248538000 | -1.909344000 | 1.336484000  |
| C | -1.927601000 | -0.107454000 | -2.176468000 |
| N | -1.912223000 | 0.060726000  | -0.830221000 |
| H | -3.802113000 | -0.949155000 | -2.772650000 |
| C | -1.654627000 | -1.967765000 | 0.574183000  |
| H | -1.329777000 | 0.835055000  | -0.529135000 |
| H | -2.439645000 | -0.024181000 | 1.118030000  |
| H | -0.602797000 | -2.937927000 | 1.952947000  |
| H | -2.436614000 | -1.328478000 | -3.828393000 |
| H | -4.095424000 | -1.891594000 | -0.582320000 |
| O | -1.292131000 | 0.676422000  | -2.887963000 |
| H | -2.607568000 | -2.153596000 | -2.257387000 |
| O | -4.410786000 | -1.441341000 | 1.420670000  |
| C | -3.961816000 | -1.067715000 | 0.118433000  |
| C | -1.337662000 | -1.220564000 | 2.960753000  |
| H | -0.859532000 | -0.253810000 | 2.799028000  |
| H | -2.394172000 | -1.079218000 | 3.184441000  |
| H | -0.861814000 | -1.687245000 | 3.819553000  |
| N | 1.448703000  | 0.563521000  | 0.034833000  |
| N | 1.607513000  | -1.189586000 | -1.358323000 |
| N | 2.210797000  | -2.941932000 | 1.849022000  |
| N | 1.885444000  | -0.580760000 | 2.149362000  |
| N | 2.187255000  | -3.985657000 | -0.223989000 |
| C | 1.205156000  | 1.905574000  | 0.513042000  |
| C | 2.050461000  | 2.996634000  | -0.164851000 |
| C | 1.041872000  | 3.683614000  | -1.103437000 |
| C | -0.277284000 | 3.558775000  | -0.315693000 |
| C | -1.499910000 | 3.646031000  | -1.131808000 |
| C | 1.383288000  | 0.093567000  | -1.262049000 |
| C | 1.828094000  | -1.603615000 | -0.057978000 |
| C | 1.734969000  | -0.530704000 | 0.823580000  |
| C | 2.074326000  | -2.865052000 | 0.512690000  |
| C | 2.119780000  | -1.820033000 | 2.573260000  |
| O | 2.487669000  | 3.896566000  | 0.838250000  |
| O | 1.343531000  | 5.046493000  | -1.331284000 |
| O | -0.167848000 | 2.240925000  | 0.283494000  |

|   |              |              |              |
|---|--------------|--------------|--------------|
| H | 1.413078000  | 1.890951000  | 1.582340000  |
| H | 2.535327000  | 4.772533000  | 0.425758000  |
| H | 2.900867000  | 2.568677000  | -0.701889000 |
| H | 1.904566000  | 5.123458000  | -2.111984000 |
| H | 0.958506000  | 3.130678000  | -2.041599000 |
| H | -0.270210000 | 4.316235000  | 0.474507000  |
| H | -1.713941000 | 2.858795000  | -1.842708000 |
| H | -2.115886000 | 4.531846000  | -1.101795000 |
| H | 1.945176000  | -3.967563000 | -1.199663000 |
| H | 2.233049000  | -4.876112000 | 0.242070000  |
| H | 1.117388000  | 0.738492000  | -2.083322000 |
| H | 2.244400000  | -1.943804000 | 3.643646000  |

### 12B-PC-complex

|   |              |              |              |
|---|--------------|--------------|--------------|
| O | 0.133700000  | -1.093201000 | -2.980483000 |
| H | -0.287241000 | 2.963729000  | 1.734146000  |
| N | 2.231245000  | -0.274733000 | -3.090617000 |
| C | 0.926417000  | 0.117874000  | -1.043036000 |
| C | -1.506672000 | -1.570265000 | -0.245121000 |
| H | 1.973540000  | -1.033616000 | 1.789088000  |
| C | -1.570641000 | -0.080028000 | -0.478762000 |
| N | -0.434224000 | 0.591995000  | -0.772822000 |
| H | -1.035245000 | -1.767848000 | 0.719752000  |
| C | 1.055858000  | -0.469751000 | -2.464583000 |
| H | -0.546244000 | 1.595931000  | -0.853598000 |
| H | 1.520640000  | 1.033975000  | -0.989655000 |
| H | 2.269212000  | -0.632491000 | -4.033790000 |
| H | -2.522088000 | -1.958526000 | -0.225596000 |
| H | 1.462638000  | -1.911335000 | -0.189410000 |
| O | -2.634173000 | 0.537120000  | -0.364064000 |
| H | -0.930812000 | -2.071432000 | -1.018870000 |
| O | 1.684000000  | -0.334600000 | 1.189376000  |
| C | 1.503726000  | -0.838683000 | -0.063302000 |
| C | 3.379443000  | 0.478439000  | -2.604942000 |
| H | 3.174645000  | 1.550602000  | -2.577831000 |
| H | 3.677769000  | 0.139198000  | -1.613032000 |
| H | 4.208976000  | 0.306604000  | -3.286333000 |
| N | -0.712891000 | 3.176971000  | -3.132646000 |
| N | -1.869396000 | 1.586958000  | -4.217876000 |
| N | 1.366791000  | 1.259135000  | -5.990447000 |
| N | 1.420914000  | 2.972845000  | -4.307755000 |
| N | -0.513693000 | -0.016397000 | -6.461293000 |
| C | -0.373046000 | 4.187530000  | -2.157835000 |
| C | -1.437601000 | 5.281648000  | -1.955431000 |
| C | -2.033088000 | 4.932806000  | -0.575894000 |
| C | -0.843407000 | 4.309663000  | 0.149492000  |

|   |              |              |              |
|---|--------------|--------------|--------------|
| C | -1.189793000 | 3.393663000  | 1.298672000  |
| C | -1.900823000 | 2.486779000  | -3.272358000 |
| C | -0.588995000 | 1.668289000  | -4.732846000 |
| C | 0.147668000  | 2.645553000  | -4.070878000 |
| C | 0.082401000  | 0.949363000  | -5.738555000 |
| C | 1.947332000  | 2.233597000  | -5.281235000 |
| O | -0.775073000 | 6.533736000  | -1.907548000 |
| O | -2.491162000 | 6.074511000  | 0.127917000  |
| O | -0.179935000 | 3.557090000  | -0.886566000 |
| H | 0.558900000  | 4.639789000  | -2.495245000 |
| H | -1.260513000 | 7.079471000  | -1.269757000 |
| H | -2.183310000 | 5.272130000  | -2.754135000 |
| H | -3.416709000 | 6.235053000  | -0.090593000 |
| H | -2.828625000 | 4.190868000  | -0.683872000 |
| H | -0.183343000 | 5.117813000  | 0.484438000  |
| H | -1.840564000 | 2.584673000  | 0.962494000  |
| H | -1.703674000 | 3.966889000  | 2.071695000  |
| H | -1.417554000 | -0.358930000 | -6.184422000 |
| H | 0.047088000  | -0.587219000 | -7.071257000 |
| H | -2.745051000 | 2.683935000  | -2.632040000 |
| H | 2.984100000  | 2.436243000  | -5.527288000 |

### 13A-RC-complex

|   |              |              |              |
|---|--------------|--------------|--------------|
| H | -1.508027000 | -2.804380000 | 1.550686000  |
| H | 4.232373000  | -4.426823000 | -0.618765000 |
| H | 4.176444000  | -3.128803000 | -1.753362000 |
| C | -4.421418000 | -2.120961000 | -1.135081000 |
| O | -2.535636000 | 1.167228000  | 2.073581000  |
| O | -0.372285000 | -0.711834000 | 2.471705000  |
| C | -3.498311000 | -1.872156000 | 0.051134000  |
| O | 0.140288000  | -0.901033000 | -1.361869000 |
| H | 0.099357000  | -4.116136000 | 1.601871000  |
| H | 2.330365000  | -4.923006000 | 0.880821000  |
| C | 0.692124000  | -1.868641000 | -0.845106000 |
| N | 0.045176000  | -2.562581000 | 0.223225000  |
| O | -5.444873000 | -1.499194000 | -1.321202000 |
| O | -4.015584000 | -3.113526000 | -1.923773000 |
| C | -1.245472000 | -2.120904000 | 0.735588000  |
| O | -4.861164000 | -0.085588000 | 1.004050000  |
| C | -1.185861000 | -0.701671000 | 1.313198000  |
| C | -2.580123000 | -0.194848000 | 1.674339000  |
| C | 2.486129000  | -3.353686000 | -0.655815000 |
| C | -3.565362000 | -0.405771000 | 0.526229000  |
| O | -2.186610000 | -2.247611000 | -0.316056000 |
| N | 3.694415000  | -3.732578000 | -1.107342000 |
| N | 1.908272000  | -2.316915000 | -1.241592000 |



|   |              |              |              |
|---|--------------|--------------|--------------|
| C | 0.647070000  | -3.637877000 | 0.802770000  |
| C | 1.861458000  | -4.074319000 | 0.407865000  |
| H | -3.877801000 | -2.510038000 | 0.865972000  |
| H | -3.278977000 | 0.245190000  | -0.310322000 |
| H | -2.950233000 | -0.758927000 | 2.537611000  |
| H | -0.769453000 | -0.050361000 | 0.549123000  |
| H | -5.475966000 | -0.249119000 | 0.273304000  |
| H | 0.458532000  | -0.235729000 | 2.258896000  |
| H | -1.848311000 | 1.613565000  | 1.549996000  |
| H | -4.669202000 | -3.228962000 | -2.634638000 |
| N | 1.785209000  | 2.160012000  | -0.007248000 |
| N | 3.493332000  | 1.660332000  | -1.384782000 |
| N | 3.995155000  | -1.020067000 | 1.118061000  |
| N | 2.080493000  | 0.340503000  | 1.611653000  |
| N | 5.315688000  | -0.721442000 | -0.762199000 |
| C | 0.659476000  | 2.861273000  | 0.603000000  |
| C | 0.510257000  | 4.310552000  | 0.143442000  |
| C | -0.408148000 | 4.177510000  | -1.091502000 |
| C | -1.317068000 | 2.978225000  | -0.718569000 |
| C | -1.698707000 | 2.081937000  | -1.825763000 |
| C | 2.495015000  | 2.468379000  | -1.153906000 |
| C | 3.455864000  | 0.757576000  | -0.341310000 |
| C | 2.398089000  | 1.040664000  | 0.515855000  |
| C | 4.277389000  | -0.333672000 | -0.003934000 |
| C | 2.932587000  | -0.663864000 | 1.835832000  |
| O | -0.155421000 | 5.007452000  | 1.178511000  |
| O | -1.212108000 | 5.323429000  | -1.297456000 |
| O | -0.576108000 | 2.239224000  | 0.284805000  |
| H | 0.796184000  | 2.797539000  | 1.680406000  |
| H | -0.727720000 | 5.663507000  | 0.752130000  |
| H | 1.467749000  | 4.782946000  | -0.089014000 |
| H | -0.739816000 | 5.946858000  | -1.862434000 |
| H | 0.174933000  | 3.950738000  | -1.984647000 |
| H | -2.205548000 | 3.400169000  | -0.235211000 |
| H | -1.117496000 | 1.189508000  | -2.011280000 |
| H | -2.509218000 | 2.359532000  | -2.483840000 |
| H | 5.604331000  | -0.164472000 | -1.547930000 |
| H | 5.936150000  | -1.436340000 | -0.421174000 |
| H | 2.238188000  | 3.310342000  | -1.773396000 |
| H | 2.725075000  | -1.272493000 | 2.708785000  |

### 13A-PC-complex

|   |              |              |              |
|---|--------------|--------------|--------------|
| H | -2.004393000 | 2.035075000  | -1.907866000 |
| H | -0.695053000 | 6.263165000  | 2.633387000  |
| H | -0.289140000 | 4.984179000  | 3.726598000  |
| C | -4.439679000 | -1.047583000 | -1.052210000 |

|   |              |              |              |
|---|--------------|--------------|--------------|
| O | 0.202817000  | -1.426768000 | -2.398571000 |
| O | 0.490517000  | 1.492067000  | -1.786184000 |
| C | -3.297636000 | -0.195895000 | -1.593602000 |
| O | -0.954562000 | 0.901375000  | 1.619871000  |
| H | -1.984619000 | 4.001658000  | -1.285728000 |
| H | -1.496945000 | 5.807952000  | 0.339019000  |
| C | -1.058631000 | 2.093721000  | 1.337337000  |
| N | -1.489267000 | 2.471035000  | 0.031090000  |
| O | -4.885353000 | -1.983266000 | -1.685112000 |
| O | -4.902625000 | -0.666888000 | 0.128761000  |
| C | -1.739100000 | 1.476860000  | -1.002970000 |
| O | -2.530005000 | -2.021299000 | -3.052599000 |
| C | -0.520188000 | 0.612926000  | -1.313220000 |
| C | -0.845668000 | -0.458871000 | -2.359073000 |
| C | -0.916204000 | 4.358844000  | 1.893189000  |
| C | -2.191202000 | -1.068659000 | -2.144020000 |
| O | -2.833895000 | 0.680355000  | -0.589305000 |
| N | -0.612504000 | 5.279627000  | 2.820717000  |
| N | -0.776983000 | 3.081792000  | 2.219892000  |
| C | -1.641474000 | 3.788241000  | -0.283734000 |
| C | -1.374021000 | 4.769129000  | 0.602577000  |
| H | -3.752514000 | 0.386809000  | -2.420143000 |
| H | -2.231295000 | -2.801972000 | 0.057558000  |
| H | -0.820978000 | 0.021263000  | -3.348319000 |
| H | -0.214616000 | 0.114071000  | -0.395546000 |
| H | -3.447906000 | -2.301281000 | -2.870528000 |
| H | 1.308895000  | 0.988899000  | -1.877581000 |
| H | 0.226955000  | -1.871407000 | -1.531961000 |
| H | -5.632173000 | -1.258237000 | 0.383540000  |
| N | 2.330051000  | -0.974705000 | 0.564730000  |
| N | 2.777809000  | 1.225415000  | 0.542308000  |
| N | 4.907807000  | 0.169363000  | -2.302460000 |
| N | 3.736654000  | -1.678101000 | -1.305782000 |
| N | 4.726721000  | 2.356118000  | -1.548772000 |
| C | 1.740611000  | -2.243096000 | 0.927287000  |
| C | 1.577337000  | -2.460185000 | 2.441345000  |
| C | 0.060539000  | -2.288311000 | 2.647208000  |
| C | -0.505669000 | -2.831946000 | 1.339091000  |
| C | -1.903557000 | -2.376286000 | 1.005872000  |
| C | 2.103354000  | 0.269216000  | 1.122274000  |
| C | 3.485138000  | 0.592543000  | -0.465257000 |
| C | 3.220376000  | -0.774791000 | -0.468894000 |
| C | 4.381743000  | 1.062409000  | -1.444905000 |
| C | 4.565818000  | -1.118349000 | -2.184748000 |
| O | 1.972679000  | -3.788833000 | 2.740017000  |
| O | -0.429516000 | -3.044337000 | 3.743160000  |

|   |              |              |              |
|---|--------------|--------------|--------------|
| O | 0.429962000  | -2.339641000 | 0.353411000  |
| H | 2.384722000  | -3.015076000 | 0.507961000  |
| H | 1.400523000  | -4.089685000 | 3.462789000  |
| H | 2.169899000  | -1.747039000 | 3.018970000  |
| H | -0.396215000 | -2.504002000 | 4.541170000  |
| H | -0.195894000 | -1.230665000 | 2.742001000  |
| H | -0.451105000 | -3.926069000 | 1.366392000  |
| H | -1.947039000 | -1.289361000 | 0.948313000  |
| H | -2.583158000 | -2.719927000 | 1.787727000  |
| H | 4.313307000  | 3.045293000  | -0.945554000 |
| H | 5.337586000  | 2.654448000  | -2.289701000 |
| H | 1.398793000  | 0.406833000  | 1.925830000  |
| H | 5.024900000  | -1.790320000 | -2.902024000 |

### 13B-RC-complex

|   |              |              |              |
|---|--------------|--------------|--------------|
| H | 2.447480000  | 0.749368000  | -1.535076000 |
| H | 6.364075000  | 4.247111000  | 2.405684000  |
| H | 6.502234000  | 4.894408000  | 0.806243000  |
| C | 1.990357000  | -2.222627000 | 1.333252000  |
| O | 3.164462000  | -3.330068000 | -1.590018000 |
| O | 4.722507000  | -0.700440000 | -2.010942000 |
| C | 1.337389000  | -1.309238000 | 0.297661000  |
| O | 4.283644000  | 2.066650000  | -2.157020000 |
| H | 3.647484000  | 0.429163000  | 1.815375000  |
| H | 5.126263000  | 2.159801000  | 2.859507000  |
| C | 4.436739000  | 2.191960000  | -0.931057000 |
| N | 3.820182000  | 1.252042000  | -0.078811000 |
| O | 1.265707000  | -3.341315000 | 1.481937000  |
| O | 2.987355000  | -1.973612000 | 1.961763000  |
| C | 2.908062000  | 0.264274000  | -0.673928000 |
| O | 0.480452000  | -1.121220000 | -1.956107000 |
| C | 3.658038000  | -0.992588000 | -1.120844000 |
| C | 2.682401000  | -1.997978000 | -1.745709000 |
| C | 5.404717000  | 3.183595000  | 0.933756000  |
| C | 1.286479000  | -1.927414000 | -1.113035000 |
| O | 1.921508000  | -0.019238000 | 0.300289000  |
| N | 6.142884000  | 4.189268000  | 1.427488000  |
| N | 5.173469000  | 3.173648000  | -0.375789000 |
| C | 4.103090000  | 1.228841000  | 1.250728000  |
| C | 4.902026000  | 2.168873000  | 1.804101000  |
| H | 0.315306000  | -1.169777000 | 0.653108000  |
| H | 0.893424000  | -2.944192000 | -1.037541000 |
| H | 2.570998000  | -1.748080000 | -2.804833000 |
| H | 4.093567000  | -1.451353000 | -0.229034000 |
| H | -0.434660000 | -1.158948000 | -1.624007000 |
| H | 4.585538000  | 0.191003000  | -2.383298000 |

|   |              |              |              |
|---|--------------|--------------|--------------|
| H | 4.054778000  | -3.372987000 | -1.961553000 |
| H | 1.681260000  | -3.905533000 | 2.155012000  |
| N | -3.613144000 | 0.248798000  | -0.350425000 |
| N | -5.419544000 | 0.625767000  | -1.626231000 |
| N | -5.512412000 | 3.694134000  | 0.449556000  |
| N | -3.664780000 | 2.266132000  | 1.019060000  |
| N | -7.058145000 | 3.196196000  | -1.206017000 |
| C | -2.423890000 | -0.387055000 | 0.209087000  |
| C | -2.683988000 | -1.026741000 | 1.572290000  |
| C | -3.089772000 | -2.457251000 | 1.181009000  |
| C | -2.154405000 | -2.740704000 | -0.014749000 |
| C | -2.625670000 | -3.732518000 | -0.991519000 |
| C | -4.433639000 | -0.194482000 | -1.363698000 |
| C | -5.245263000 | 1.670916000  | -0.740383000 |
| C | -4.125969000 | 1.456794000  | 0.059564000  |
| C | -5.958710000 | 2.863340000  | -0.509889000 |
| C | -4.417907000 | 3.357646000  | 1.141154000  |
| O | -1.456935000 | -1.031728000 | 2.279476000  |
| O | -2.835138000 | -3.402136000 | 2.200042000  |
| O | -2.005634000 | -1.432162000 | -0.651769000 |
| H | -1.644700000 | 0.372295000  | 0.281213000  |
| H | -1.455544000 | -1.816098000 | 2.848544000  |
| H | -3.462041000 | -0.498084000 | 2.127157000  |
| H | -3.606340000 | -3.466586000 | 2.775900000  |
| H | -4.134182000 | -2.478122000 | 0.863009000  |
| H | -1.187291000 | -3.037386000 | 0.401136000  |
| H | -3.394352000 | -3.470144000 | -1.704536000 |
| H | -2.280591000 | -4.753654000 | -0.935604000 |
| H | -7.407801000 | 2.594158000  | -1.930363000 |
| H | -7.534256000 | 4.060079000  | -1.011142000 |
| H | -4.235985000 | -1.120990000 | -1.874148000 |
| H | -4.108166000 | 4.068942000  | 1.899466000  |

### **13B-PC-complex**

|   |             |              |              |
|---|-------------|--------------|--------------|
| H | 1.893820000 | -0.583458000 | 0.806036000  |
| H | 7.435552000 | 0.003122000  | -2.646230000 |
| H | 7.658558000 | -1.244501000 | -1.467708000 |
| C | 0.194247000 | 2.768175000  | -1.006675000 |
| O | 0.474825000 | 2.693000000  | 2.780134000  |
| O | 3.067296000 | 1.271883000  | 2.407321000  |
| C | 0.050478000 | 1.330663000  | -0.485902000 |
| O | 3.987603000 | -1.301518000 | 1.393549000  |
| H | 3.158985000 | 1.728687000  | -1.611384000 |
| H | 5.407563000 | 1.417634000  | -2.670388000 |
| C | 4.340601000 | -0.730834000 | 0.348439000  |
| N | 3.466787000 | 0.212202000  | -0.233117000 |

|   |              |              |              |
|---|--------------|--------------|--------------|
| O | -1.016189000 | 3.312132000  | -1.202944000 |
| O | 1.237367000  | 3.348386000  | -1.180402000 |
| C | 2.129447000  | 0.369778000  | 0.340094000  |
| O | -1.625429000 | 1.287793000  | 1.336440000  |
| C | 2.080158000  | 1.463258000  | 1.407519000  |
| C | 0.678709000  | 1.487933000  | 2.022982000  |
| C | 5.898446000  | -0.234688000 | -1.303689000 |
| C | -0.336201000 | 1.350187000  | 0.956609000  |
| O | 1.252644000  | 0.616194000  | -0.743338000 |
| N | 7.087767000  | -0.513474000 | -1.857878000 |
| N | 5.524720000  | -0.957780000 | -0.251718000 |
| C | 3.869578000  | 0.988020000  | -1.274374000 |
| C | 5.084315000  | 0.810034000  | -1.839516000 |
| H | -0.738525000 | 0.851652000  | -1.071345000 |
| H | -3.861762000 | 3.110562000  | -0.526937000 |
| H | 0.593071000  | 0.627182000  | 2.704081000  |
| H | 2.275964000  | 2.429817000  | 0.938334000  |
| H | -2.221379000 | 1.049469000  | 0.590892000  |
| H | 3.282947000  | 0.324998000  | 2.459684000  |
| H | 1.117891000  | 2.685806000  | 3.502286000  |
| H | -0.908897000 | 4.240509000  | -1.468262000 |
| N | -2.537045000 | -1.601073000 | 0.041679000  |
| N | -1.452070000 | -2.268633000 | 1.891756000  |
| N | 1.263162000  | -2.747209000 | -0.582825000 |
| N | -0.759514000 | -1.942007000 | -1.595790000 |
| N | 1.500137000  | -3.137030000 | 1.695420000  |
| C | -3.502299000 | -0.943315000 | -0.798440000 |
| C | -4.981679000 | -1.258913000 | -0.507423000 |
| C | -5.528906000 | 0.080657000  | 0.035189000  |
| C | -4.645995000 | 1.112518000  | -0.661290000 |
| C | -4.565700000 | 2.466159000  | -0.000276000 |
| C | -2.565670000 | -1.788240000 | 1.411699000  |
| C | -0.623737000 | -2.400396000 | 0.790394000  |
| C | -1.276266000 | -1.987369000 | -0.367458000 |
| C | 0.724466000  | -2.775197000 | 0.648825000  |
| C | 0.510209000  | -2.345125000 | -1.611055000 |
| O | -5.606102000 | -1.594410000 | -1.733517000 |
| O | -6.888048000 | 0.289928000  | -0.301765000 |
| O | -3.344933000 | 0.482426000  | -0.640851000 |
| H | -3.267280000 | -1.218809000 | -1.825434000 |
| H | -6.511542000 | -1.249986000 | -1.686204000 |
| H | -5.088134000 | -2.075635000 | 0.210157000  |
| H | -7.449429000 | -0.043055000 | 0.408217000  |
| H | -5.374895000 | 0.137705000  | 1.115519000  |
| H | -4.975488000 | 1.209950000  | -1.701207000 |
| H | -4.248752000 | 2.372586000  | 1.039682000  |

|   |              |              |              |
|---|--------------|--------------|--------------|
| H | -5.550148000 | 2.934502000  | -0.023742000 |
| H | 1.136636000  | -2.964428000 | 2.619363000  |
| H | 2.497098000  | -3.004539000 | 1.583413000  |
| H | -3.439535000 | -1.545111000 | 1.994528000  |
| H | 1.002608000  | -2.335976000 | -2.576983000 |

### **13C-RC-complex**

|   |           |           |           |
|---|-----------|-----------|-----------|
| H | -3.331217 | -2.134831 | 1.165676  |
| H | -7.512529 | 2.558270  | 1.869017  |
| H | -6.632023 | 3.539995  | 0.747890  |
| C | 0.531821  | -1.353974 | 2.017460  |
| O | -1.433017 | -3.200167 | -2.178379 |
| O | -3.961304 | -2.180338 | -1.323764 |
| C | -0.737152 | -1.873512 | 1.294488  |
| O | -2.852747 | 1.233387  | -0.655732 |
| H | -4.968044 | -1.387396 | 2.130687  |
| H | -6.738617 | 0.303961  | 2.513732  |
| C | -3.809076 | 1.029998  | 0.086496  |
| N | -3.920008 | -0.215163 | 0.772589  |
| O | 1.502508  | -2.168513 | 1.985968  |
| O | 0.510956  | -0.236956 | 2.557643  |
| C | -2.926569 | -1.273644 | 0.620290  |
| O | 0.492006  | -3.495544 | -0.064455 |
| C | -2.705906 | -1.727782 | -0.825182 |
| C | -1.672505 | -2.842812 | -0.816615 |
| C | -5.796755 | 1.717157  | 1.111380  |
| C | -0.402632 | -2.392596 | -0.116930 |
| O | -1.724842 | -0.846760 | 1.221135  |
| N | -6.725126 | 2.677150  | 1.256789  |
| N | -4.786309 | 1.951365  | 0.288400  |
| C | -4.957664 | -0.430680 | 1.628418  |
| C | -5.920500 | 0.491672  | 1.835980  |
| H | -1.123067 | -2.716821 | 1.887017  |
| H | 0.030608  | -1.567477 | -0.690181 |
| H | -2.083843 | -3.706657 | -0.276199 |
| H | -2.330405 | -0.892485 | -1.415708 |
| H | 1.119337  | -3.245010 | 0.656729  |
| H | -3.794066 | -2.616614 | -2.168707 |
| H | -0.759920 | -3.892238 | -2.183011 |
| N | 2.727499  | 0.360333  | -0.404188 |
| N | 4.149837  | -1.279789 | -0.974503 |
| N | 6.008184  | 0.135166  | 1.900867  |
| N | 3.946115  | 1.299823  | 1.489480  |
| N | 6.756047  | -1.647671 | 0.616866  |
| C | 1.512519  | 1.179173  | -0.357484 |
| C | 1.749100  | 2.626130  | -0.804983 |

|   |           |           |           |
|---|-----------|-----------|-----------|
| C | 1.299958  | 2.590357  | -2.276594 |
| C | 0.136035  | 1.576871  | -2.229267 |
| C | -0.169807 | 0.893952  | -3.496540 |
| C | 3.009070  | -0.692114 | -1.242799 |
| C | 4.648761  | -0.581436 | 0.107280  |
| C | 3.775139  | 0.438922  | 0.479239  |
| C | 5.818649  | -0.715900 | 0.877335  |
| C | 5.083173  | 1.072383  | 2.142094  |
| O | 0.897882  | 3.466184  | -0.044301 |
| O | 0.828979  | 3.841702  | -2.742864 |
| O | 0.574383  | 0.614520  | -1.246844 |
| H | 1.138918  | 1.143221  | 0.667032  |
| H | 0.636162  | 4.196970  | -0.624291 |
| H | 2.795312  | 2.919116  | -0.688792 |
| H | 1.568831  | 4.347361  | -3.099334 |
| H | 2.106297  | 2.206152  | -2.905329 |
| H | -0.749246 | 2.096110  | -1.847452 |
| H | 0.426704  | 0.047801  | -3.808629 |
| H | -0.914383 | 1.297337  | -4.166285 |
| H | 6.575967  | -2.364007 | -0.064910 |
| H | 7.514547  | -1.777968 | 1.264570  |
| H | 2.323174  | -0.976470 | -2.021492 |
| H | 5.292591  | 1.728912  | 2.980165  |

### **<sup>13</sup>C-PC-complex**

|   |           |           |           |
|---|-----------|-----------|-----------|
| H | 3.517675  | -2.026243 | -1.118751 |
| H | 7.140073  | 3.056296  | -2.175339 |
| H | 6.233385  | 3.967496  | -1.016264 |
| C | -0.472375 | -1.657706 | -1.660216 |
| O | 1.940221  | -3.141143 | 2.403031  |
| O | 4.333771  | -1.881922 | 1.338166  |
| C | 0.922746  | -2.035853 | -1.086962 |
| O | 2.807862  | 1.315283  | 0.661469  |
| H | 5.015823  | -1.139474 | -2.199970 |
| H | 6.572780  | 0.717207  | -2.725353 |
| C | 3.736112  | 1.195107  | -0.133425 |
| N | 3.936405  | -0.047375 | -0.800860 |
| O | -1.371520 | -2.528816 | -1.434522 |
| O | -0.599136 | -0.613593 | -2.310495 |
| C | 3.069228  | -1.195651 | -0.559054 |
| O | -0.107205 | -3.601515 | 0.488455  |
| C | 3.000782  | -1.624510 | 0.909005  |
| C | 2.126420  | -2.868391 | 1.009435  |
| C | 5.575247  | 2.058745  | -1.291460 |
| C | 0.848567  | -2.659862 | 0.277050  |

|   |           |           |           |
|---|-----------|-----------|-----------|
| O | 1.791151  | -0.902398 | -1.076464 |
| N | 6.388992  | 3.105010  | -1.510190 |
| N | 4.597611  | 2.207461  | -0.410640 |
| C | 4.936187  | -0.176509 | -1.716262 |
| C | 5.782327  | 0.835538  | -2.000837 |
| H | 1.331459  | -2.773971 | -1.809782 |
| H | 0.442623  | -1.201783 | 3.075631  |
| H | 2.686918  | -3.713565 | 0.563099  |
| H | 2.548729  | -0.827624 | 1.496235  |
| H | -0.806076 | -3.379869 | -0.211025 |
| H | 4.287093  | -2.234430 | 2.235423  |
| H | 1.250562  | -3.812276 | 2.479807  |
| N | -3.022131 | 0.366586  | 0.233433  |
| N | -4.823959 | -0.918641 | 0.605388  |
| N | -6.092228 | 1.058118  | -2.260204 |
| N | -3.850771 | 1.676730  | -1.650234 |
| N | -7.322267 | -0.570318 | -1.155432 |
| C | -1.662641 | 0.902478  | 0.339412  |
| C | -1.607698 | 2.255040  | 1.064211  |
| C | -1.185913 | 1.842516  | 2.486600  |
| C | -0.287621 | 0.634812  | 2.225692  |
| C | -0.181598 | -0.354878 | 3.361534  |
| C | -3.600453 | -0.630451 | 0.979805  |
| C | -5.067174 | -0.064360 | -0.452204 |
| C | -3.956509 | 0.741566  | -0.698360 |
| C | -6.178637 | 0.127208  | -1.293604 |
| C | -4.959819 | 1.762120  | -2.380536 |
| O | -0.602477 | 3.048775  | 0.455133  |
| O | -0.452427 | 2.854482  | 3.161304  |
| O | -0.892283 | -0.009220 | 1.086348  |
| H | -1.277859 | 0.988779  | -0.676247 |
| H | -0.159029 | 3.530968  | 1.169376  |
| H | -2.573427 | 2.765717  | 1.035391  |
| H | -1.068072 | 3.448234  | 3.606798  |
| H | -2.064444 | 1.543933  | 3.064628  |
| H | 0.705033  | 0.996106  | 1.939935  |
| H | -1.169765 | -0.723308 | 3.645028  |
| H | 0.269590  | 0.133317  | 4.227472  |
| H | -7.368881 | -1.339370 | -0.510151 |
| H | -8.049850 | -0.469228 | -1.842345 |
| H | -3.054963 | -1.113907 | 1.771502  |
| H | -4.951933 | 2.498966  | -3.176917 |

**13D-RC-complex**

|   |              |              |             |
|---|--------------|--------------|-------------|
| H | -1.939468000 | -0.555854000 | 0.842655000 |
|---|--------------|--------------|-------------|



|   |              |              |              |
|---|--------------|--------------|--------------|
| H | -8.393902000 | -0.037659000 | 0.033593000  |
| H | -7.963727000 | -1.704518000 | -0.147358000 |
| C | -1.734448000 | 3.646204000  | 0.104249000  |
| O | 0.769818000  | 0.996226000  | -1.677887000 |
| O | -1.617737000 | -0.530378000 | -1.807924000 |
| C | -1.188281000 | 2.472338000  | 0.981858000  |
| O | -3.328259000 | -2.065380000 | -0.308484000 |
| H | -4.189538000 | 2.139003000  | 0.323964000  |
| H | -6.674430000 | 1.734057000  | 0.180415000  |
| C | -4.182589000 | -1.180079000 | -0.108856000 |
| N | -3.742494000 | 0.132919000  | 0.139477000  |
| O | -0.932344000 | 4.599372000  | -0.012899000 |
| O | -2.892416000 | 3.560095000  | -0.361970000 |
| C | -2.292242000 | 0.365854000  | 0.371911000  |
| O | 0.925937000  | 1.522315000  | 1.591080000  |
| C | -1.507272000 | 0.576691000  | -0.923467000 |
| C | -0.046978000 | 0.773937000  | -0.530795000 |
| C | -6.377837000 | -0.431153000 | -0.016553000 |
| C | 0.146535000  | 1.930053000  | 0.464438000  |
| O | -2.139645000 | 1.427900000  | 1.275735000  |
| N | -7.683838000 | -0.744151000 | -0.041207000 |
| N | -5.504821000 | -1.429444000 | -0.131988000 |
| C | -4.631242000 | 1.156381000  | 0.214652000  |
| C | -5.963083000 | 0.924257000  | 0.124147000  |
| H | -0.991744000 | 2.915370000  | 1.957972000  |
| H | 0.643042000  | 2.750408000  | -0.055411000 |
| H | 0.270384000  | -0.144183000 | -0.028488000 |
| H | -1.885467000 | 1.465541000  | -1.433805000 |
| H | 1.805783000  | 1.244269000  | 1.281646000  |
| H | -2.083007000 | -1.256436000 | -1.344453000 |
| H | 0.712540000  | 0.199529000  | -2.222919000 |
| N | 3.065260000  | -1.458659000 | -0.023628000 |
| N | 1.775231000  | -2.246850000 | -1.686574000 |
| N | -0.287919000 | -3.305526000 | 1.200028000  |
| N | 1.727724000  | -2.190657000 | 1.882042000  |
| N | -0.861018000 | -3.691291000 | -1.019082000 |
| C | 4.031877000  | -0.643741000 | 0.686010000  |
| C | 5.410315000  | -0.567866000 | 0.027459000  |
| C | 5.343384000  | 0.755111000  | -0.759415000 |
| C | 4.455377000  | 1.641301000  | 0.142301000  |
| C | 3.684320000  | 2.676653000  | -0.566435000 |
| C | 2.857979000  | -1.582528000 | -1.382327000 |
| C | 1.216080000  | -2.578517000 | -0.464555000 |
| C | 1.999332000  | -2.094503000 | 0.579522000  |
| C | 0.006200000  | -3.199998000 | -0.107158000 |
| C | 0.570785000  | -2.814016000 | 2.099469000  |

|   |              |              |              |
|---|--------------|--------------|--------------|
| O | 6.372467000  | -0.478743000 | 1.062252000  |
| O | 6.609872000  | 1.362823000  | -0.919581000 |
| O | 3.552019000  | 0.699499000  | 0.775864000  |
| H | 4.108352000  | -1.059595000 | 1.688723000  |
| H | 7.101322000  | 0.061545000  | 0.721160000  |
| H | 5.606316000  | -1.430593000 | -0.614509000 |
| H | 7.014694000  | 1.048865000  | -1.737011000 |
| H | 4.856685000  | 0.600912000  | -1.724316000 |
| H | 5.102399000  | 2.079791000  | 0.908499000  |
| H | 2.812751000  | 2.381738000  | -1.135500000 |
| H | 4.044017000  | 3.693623000  | -0.608377000 |
| H | -0.719651000 | -3.423921000 | -1.980240000 |
| H | -1.822869000 | -3.778898000 | -0.724020000 |
| H | 3.541878000  | -1.163925000 | -2.101647000 |
| H | 0.279819000  | -2.931556000 | 3.137751000  |

### 13D-PC-complex

62

symmetry c1

|   |              |              |              |
|---|--------------|--------------|--------------|
| H | -3.871476000 | -2.408610000 | -0.150688000 |
| H | -8.814517000 | 1.886996000  | -0.278246000 |
| H | -9.089341000 | 0.715461000  | -1.521927000 |
| C | -1.859118000 | 0.379588000  | 2.506744000  |
| O | -0.097976000 | -1.133610000 | -1.030410000 |
| O | -2.731965000 | -0.965452000 | -2.080382000 |
| C | -2.123439000 | -1.095966000 | 2.051147000  |
| O | -5.300886000 | -1.954503000 | -1.953405000 |
| H | -4.503718000 | 0.763499000  | 1.340945000  |
| H | -6.683246000 | 1.967363000  | 0.976894000  |
| C | -5.722394000 | -1.056074000 | -1.201738000 |
| N | -4.900601000 | -0.624732000 | -0.143910000 |
| O | -0.746167000 | 0.507014000  | 3.096241000  |
| O | -2.694233000 | 1.264564000  | 2.262400000  |
| C | -3.657538000 | -1.378268000 | 0.143642000  |
| O | 0.243101000  | -1.454274000 | 1.646836000  |
| C | -2.484783000 | -0.864264000 | -0.687192000 |
| C | -1.224399000 | -1.654760000 | -0.323322000 |
| C | -7.275851000 | 0.563872000  | -0.605336000 |
| C | -1.017804000 | -1.562547000 | 1.151074000  |
| O | -3.434801000 | -1.325339000 | 1.528704000  |
| N | -8.489419000 | 1.100793000  | -0.812264000 |
| N | -6.925122000 | -0.471861000 | -1.363754000 |
| C | -5.234333000 | 0.463374000  | 0.598086000  |
| C | -6.409906000 | 1.103004000  | 0.391305000  |
| H | -2.088638000 | -1.682608000 | 2.976295000  |
| H | -0.319431000 | 2.197989000  | 1.122738000  |

|   |              |              |              |
|---|--------------|--------------|--------------|
| H | -1.384261000 | -2.697337000 | -0.648138000 |
| H | -2.310877000 | 0.188693000  | -0.442695000 |
| H | 0.175391000  | -0.768513000 | 2.367791000  |
| H | -3.554787000 | -1.476993000 | -2.221745000 |
| H | -0.322500000 | -1.171263000 | -1.970047000 |
| N | 3.909811000  | 0.242927000  | 0.190439000  |
| N | 3.583656000  | -1.919686000 | -0.304005000 |
| N | 7.288926000  | -1.873430000 | -0.293944000 |
| N | 6.350764000  | 0.283946000  | 0.198951000  |
| N | 6.010613000  | -3.766504000 | -0.705561000 |
| C | 3.641976000  | 1.654542000  | 0.464088000  |
| C | 3.730655000  | 2.523561000  | -0.798537000 |
| C | 2.253763000  | 2.624856000  | -1.214428000 |
| C | 1.539363000  | 2.657534000  | 0.134748000  |
| C | 0.104359000  | 2.192336000  | 0.119543000  |
| C | 3.006821000  | -0.769338000 | -0.046363000 |
| C | 4.937184000  | -1.653604000 | -0.239909000 |
| C | 5.160148000  | -0.312859000 | 0.066366000  |
| C | 6.081310000  | -2.451697000 | -0.422893000 |
| C | 7.352979000  | -0.570281000 | 0.004272000  |
| O | 4.233799000  | 3.796368000  | -0.428455000 |
| O | 1.963064000  | 3.806190000  | -1.945024000 |
| O | 2.331171000  | 1.780850000  | 0.970314000  |
| H | 4.378705000  | 1.984224000  | 1.198456000  |
| H | 3.791522000  | 4.446269000  | -0.995157000 |
| H | 4.362104000  | 2.060241000  | -1.560725000 |
| H | 2.127716000  | 3.648622000  | -2.882264000 |
| H | 1.960156000  | 1.731997000  | -1.772925000 |
| H | 1.610699000  | 3.675927000  | 0.532537000  |
| H | 0.034525000  | 1.179944000  | -0.279294000 |
| H | -0.483326000 | 2.862761000  | -0.510748000 |
| H | 5.122254000  | -4.192854000 | -0.903216000 |
| H | 6.851516000  | -4.273047000 | -0.923958000 |
| H | 1.942470000  | -0.610010000 | 0.006355000  |
| H | 8.353858000  | -0.161464000 | 0.095771000  |

#### **14A-RC-complex**

|   |             |              |              |
|---|-------------|--------------|--------------|
| O | 3.791582000 | 1.245220000  | -2.102128000 |
| H | 1.015964000 | -0.298535000 | 0.905761000  |
| C | 2.643583000 | 0.675852000  | -0.077190000 |
| N | 1.709503000 | 1.756227000  | -0.360197000 |
| C | 3.684281000 | 0.446759000  | -1.194870000 |
| H | 2.246366000 | 2.570582000  | -0.633529000 |
| H | 3.242684000 | 0.988448000  | 0.785233000  |
| H | 1.521303000 | -1.154435000 | -0.539184000 |
| C | 1.890389000 | -0.606385000 | 0.325415000  |

|   |              |              |              |
|---|--------------|--------------|--------------|
| C | 2.625256000  | -1.592132000 | 1.195302000  |
| O | 2.508674000  | -2.792217000 | 1.112279000  |
| O | 3.399424000  | -1.002763000 | 2.124774000  |
| H | 3.803147000  | -1.695691000 | 2.672624000  |
| C | 4.590529000  | -0.751811000 | -1.084778000 |
| H | 5.013878000  | -0.824107000 | -0.081199000 |
| H | 4.019003000  | -1.666661000 | -1.261213000 |
| H | 5.387854000  | -0.683229000 | -1.821310000 |
| C | 0.713685000  | 1.479229000  | -1.397115000 |
| H | 0.164208000  | 2.397535000  | -1.602490000 |
| H | 1.140132000  | 1.114264000  | -2.339570000 |
| H | -0.005349000 | 0.741829000  | -1.038838000 |
| N | -3.141681000 | 0.888706000  | 1.600237000  |
| N | -4.731577000 | -0.304558000 | 2.642362000  |
| N | -6.494002000 | 0.354652000  | -0.549315000 |
| N | -4.298612000 | 1.332550000  | -0.504347000 |
| N | -7.401243000 | -0.843708000 | 1.217268000  |
| C | -1.891895000 | 1.594192000  | 1.371917000  |
| C | -1.816007000 | 2.979006000  | 2.044433000  |
| C | -0.885665000 | 2.723008000  | 3.245472000  |
| C | 0.047712000  | 1.620726000  | 2.702773000  |
| C | 0.707301000  | 0.785757000  | 3.718506000  |
| C | -3.527322000 | 0.200935000  | 2.728629000  |
| C | -5.173654000 | 0.072496000  | 1.388871000  |
| C | -4.199645000 | 0.815025000  | 0.724790000  |
| C | -6.374929000 | -0.153643000 | 0.690241000  |
| C | -5.473336000 | 1.050746000  | -1.063273000 |
| O | -1.222753000 | 3.887782000  | 1.134953000  |
| O | -0.126995000 | 3.862311000  | 3.606690000  |
| O | -0.840589000 | 0.806338000  | 1.904564000  |
| H | -1.792237000 | 1.712154000  | 0.292436000  |
| H | -0.671527000 | 4.487980000  | 1.660190000  |
| H | -2.807260000 | 3.325962000  | 2.348113000  |
| H | -0.610138000 | 4.372255000  | 4.267680000  |
| H | -1.459456000 | 2.341613000  | 4.092670000  |
| H | 0.782930000  | 2.095920000  | 2.043306000  |
| H | 0.158439000  | -0.016920000 | 4.191701000  |
| H | 1.703170000  | 1.024620000  | 4.058522000  |
| H | -7.312967000 | -1.281575000 | 2.117299000  |
| H | -8.218477000 | -1.027247000 | 0.660846000  |
| H | -2.862785000 | 0.093782000  | 3.569879000  |
| H | -5.628734000 | 1.434090000  | -2.066208000 |

#### 14A-PC-complex

|   |             |              |              |
|---|-------------|--------------|--------------|
| O | 0.475617000 | -1.644426000 | -1.953828000 |
| H | 1.858294000 | 3.801821000  | 1.791471000  |

|   |              |              |              |
|---|--------------|--------------|--------------|
| C | 1.596510000  | -0.465161000 | -0.172451000 |
| N | 1.842816000  | 0.595693000  | -1.137778000 |
| C | 0.726592000  | -1.647047000 | -0.773699000 |
| H | 2.183892000  | 0.158505000  | -1.985976000 |
| H | 2.548715000  | -0.967901000 | 0.037907000  |
| H | 0.367400000  | 0.887376000  | 1.086722000  |
| C | 1.037661000  | 0.042303000  | 1.099654000  |
| C | 1.311440000  | -0.482508000 | 2.410839000  |
| O | 0.783729000  | -0.059732000 | 3.431799000  |
| O | 2.222273000  | -1.485453000 | 2.438428000  |
| H | 2.333917000  | -1.765320000 | 3.360411000  |
| C | 0.312189000  | -2.752330000 | 0.149809000  |
| H | 1.152003000  | -3.069449000 | 0.767891000  |
| H | -0.459604000 | -2.373175000 | 0.825764000  |
| H | -0.082911000 | -3.588438000 | -0.422834000 |
| C | 0.686950000  | 1.433503000  | -1.478698000 |
| H | 0.946800000  | 2.033638000  | -2.350330000 |
| H | -0.217979000 | 0.863277000  | -1.716681000 |
| H | 0.454735000  | 2.118962000  | -0.663939000 |
| N | -2.335352000 | 1.363204000  | 1.349502000  |
| N | -2.383724000 | -0.881394000 | 1.372031000  |
| N | -3.270928000 | -0.318710000 | -2.181350000 |
| N | -2.931108000 | 1.740452000  | -0.989494000 |
| N | -3.100714000 | -2.412266000 | -1.197622000 |
| C | -2.061643000 | 2.728651000  | 1.747234000  |
| C | -2.332953000 | 3.033744000  | 3.229780000  |
| C | -0.911488000 | 3.115235000  | 3.820951000  |
| C | -0.110511000 | 3.678700000  | 2.650158000  |
| C | 1.377629000  | 3.430015000  | 2.696827000  |
| C | -2.158953000 | 0.200313000  | 2.070409000  |
| C | -2.711363000 | -0.419488000 | 0.109642000  |
| C | -2.682698000 | 0.971482000  | 0.073448000  |
| C | -3.027374000 | -1.074205000 | -1.095838000 |
| C | -3.214106000 | 1.012940000  | -2.068295000 |
| O | -2.975821000 | 4.295791000  | 3.305641000  |
| O | -0.832941000 | 3.987364000  | 4.936962000  |
| O | -0.680289000 | 3.009826000  | 1.509498000  |
| H | -2.682365000 | 3.365304000  | 1.117281000  |
| H | -2.659832000 | 4.716697000  | 4.119957000  |
| H | -2.948892000 | 2.265928000  | 3.703377000  |
| H | -1.006987000 | 3.488055000  | 5.743371000  |
| H | -0.543808000 | 2.115421000  | 4.065435000  |
| H | -0.314629000 | 4.753799000  | 2.579010000  |
| H | 1.585232000  | 2.365731000  | 2.800394000  |
| H | 1.804464000  | 3.955698000  | 3.552312000  |
| H | -2.853377000 | -2.996751000 | -0.418675000 |

|   |              |              |              |
|---|--------------|--------------|--------------|
| H | -3.23920000  | -2.836256000 | -2.099000000 |
| H | -1.835082000 | 0.214731000  | 3.097513000  |
| H | -3.422306000 | 1.567727000  | -2.976856000 |

### 14B-RC-complex

|   |              |              |              |
|---|--------------|--------------|--------------|
| O | 0.413791000  | -1.705076000 | -1.874700000 |
| H | 1.996486000  | 1.220685000  | 0.961197000  |
| C | 1.795806000  | -0.393031000 | -0.416882000 |
| N | 1.845558000  | 0.624885000  | -1.466460000 |
| C | 0.851447000  | -1.560257000 | -0.747850000 |
| H | 2.010636000  | 0.153204000  | -2.348769000 |
| H | 2.783724000  | -0.868780000 | -0.366316000 |
| H | 0.494746000  | 0.370324000  | 1.165795000  |
| C | 1.553301000  | 0.221602000  | 0.966171000  |
| C | 2.187967000  | -0.507467000 | 2.173384000  |
| O | 1.674682000  | -0.245683000 | 3.291700000  |
| O | 3.175595000  | -1.253535000 | 1.964031000  |
| C | 0.536994000  | -2.543880000 | 0.346458000  |
| H | 1.446286000  | -2.813510000 | 0.884697000  |
| H | -0.133441000 | -2.071717000 | 1.069534000  |
| H | 0.053276000  | -3.424986000 | -0.070830000 |
| C | 0.621566000  | 1.421077000  | -1.597840000 |
| H | 0.718961000  | 2.078203000  | -2.463263000 |
| H | -0.284817000 | 0.819347000  | -1.728368000 |
| H | 0.484167000  | 2.048517000  | -0.716683000 |
| N | -2.149355000 | 1.615763000  | 1.329658000  |
| N | -2.242337000 | -0.612163000 | 1.600970000  |
| N | -3.291232000 | -0.419231000 | -1.945726000 |
| N | -2.863977000 | 1.749954000  | -1.003289000 |
| N | -3.100934000 | -2.397827000 | -0.746764000 |
| C | -1.824818000 | 3.009734000  | 1.577304000  |
| C | -2.418800000 | 3.581088000  | 2.871403000  |
| C | -1.226361000 | 3.533916000  | 3.843699000  |
| C | -0.024124000 | 3.785453000  | 2.906399000  |
| C | 1.256768000  | 3.227988000  | 3.375761000  |
| C | -1.967012000 | 0.534495000  | 2.165064000  |
| C | -2.619052000 | -0.281751000 | 0.312491000  |
| C | -2.568424000 | 1.096906000  | 0.123476000  |
| C | -3.000205000 | -1.056423000 | -0.798316000 |
| C | -3.212459000 | 0.916000000  | -1.980513000 |
| O | -2.797135000 | 4.923404000  | 2.618741000  |
| O | -1.283000000 | 4.543356000  | 4.834659000  |
| O | -0.413387000 | 3.154917000  | 1.666067000  |
| H | -2.205961000 | 3.560702000  | 0.718189000  |
| H | -2.643296000 | 5.415330000  | 3.439743000  |

|   |              |              |              |
|---|--------------|--------------|--------------|
| H | -3.272663000 | 2.994191000  | 3.220097000  |
| H | -1.763065000 | 4.209866000  | 5.602111000  |
| H | -1.144344000 | 2.544745000  | 4.298079000  |
| H | 0.046606000  | 4.869110000  | 2.756554000  |
| H | 1.431758000  | 2.160976000  | 3.300738000  |
| H | 1.956552000  | 3.858136000  | 3.905173000  |
| H | -2.753859000 | -2.893220000 | 0.056358000  |
| H | -3.235139000 | -2.910944000 | -1.601776000 |
| H | -1.609619000 | 0.652388000  | 3.174281000  |
| H | -3.462004000 | 1.373475000  | -2.931922000 |

#### 14B-PC-complex

|   |              |              |              |
|---|--------------|--------------|--------------|
| O | 0.623958000  | -1.744982000 | -1.693429000 |
| H | 1.597323000  | 4.305114000  | 1.155534000  |
| C | 1.671006000  | -0.280826000 | -0.088885000 |
| N | 1.753891000  | 0.714049000  | -1.158106000 |
| C | 0.925423000  | -1.579577000 | -0.529562000 |
| H | 2.090339000  | 0.236821000  | -1.986929000 |
| H | 2.683998000  | -0.650858000 | 0.121627000  |
| H | 0.368058000  | 1.022473000  | 1.135231000  |
| C | 1.144691000  | 0.276000000  | 1.185150000  |
| C | 1.608449000  | -0.136144000 | 2.528487000  |
| O | 0.961792000  | 0.340379000  | 3.511325000  |
| O | 2.598595000  | -0.917655000 | 2.604809000  |
| C | 0.652189000  | -2.611130000 | 0.524977000  |
| H | 1.479389000  | -2.665573000 | 1.232646000  |
| H | -0.228112000 | -2.286322000 | 1.087950000  |
| H | 0.451245000  | -3.577061000 | 0.064582000  |
| C | 0.489090000  | 1.376924000  | -1.498123000 |
| H | 0.628667000  | 1.929204000  | -2.428113000 |
| H | -0.350184000 | 0.684252000  | -1.636950000 |
| H | 0.211984000  | 2.093150000  | -0.725391000 |
| N | -2.318583000 | 1.419737000  | 1.440198000  |
| N | -2.196466000 | -0.822042000 | 1.458742000  |
| N | -3.556945000 | -0.347784000 | -1.953118000 |
| N | -3.236048000 | 1.737675000  | -0.802086000 |
| N | -3.097036000 | -2.418544000 | -1.007320000 |
| C | -2.130578000 | 2.808703000  | 1.811816000  |
| C | -2.143236000 | 3.071655000  | 3.325551000  |
| C | -0.650257000 | 3.282418000  | 3.638114000  |
| C | -0.150702000 | 3.952056000  | 2.361145000  |
| C | 1.335369000  | 3.851826000  | 2.112356000  |
| C | -1.958482000 | 0.276963000  | 2.125930000  |
| C | -2.717932000 | -0.392795000 | 0.252410000  |
| C | -2.798072000 | 0.996392000  | 0.219204000  |
| C | -3.120395000 | -1.074479000 | -0.909546000 |

|   |              |              |              |
|---|--------------|--------------|--------------|
| C | -3.594157000 | 0.985130000  | -1.840459000 |
| O | -2.875528000 | 4.266198000  | 3.557528000  |
| O | -0.446001000 | 4.138928000  | 4.754859000  |
| O | -0.866968000 | 3.259375000  | 1.321373000  |
| H | -2.931293000 | 3.369101000  | 1.329177000  |
| H | -2.445706000 | 4.705560000  | 4.307542000  |
| H | -2.584964000 | 2.245258000  | 3.886627000  |
| H | -0.386872000 | 3.603506000  | 5.554333000  |
| H | -0.147119000 | 2.319926000  | 3.764036000  |
| H | -0.462709000 | 5.003747000  | 2.375756000  |
| H | 1.654014000  | 2.809999000  | 2.112016000  |
| H | 1.868852000  | 4.384866000  | 2.901215000  |
| H | -2.634247000 | -2.959688000 | -0.297342000 |
| H | -3.249155000 | -2.844714000 | -1.906002000 |
| H | -1.466713000 | 0.321591000  | 3.084026000  |
| H | -3.958592000 | 1.517218000  | -2.712789000 |

### 15-RC-complex

|   |           |           |           |
|---|-----------|-----------|-----------|
| P | -4.725904 | 1.729353  | 0.058796  |
| O | -6.187001 | 1.663895  | 0.614154  |
| O | -4.738103 | 2.421994  | -1.364151 |
| O | -4.057640 | 0.422146  | 0.135504  |
| O | -4.027073 | 2.873596  | 0.929245  |
| P | -2.641581 | 3.681832  | 0.741137  |
| O | -2.882482 | 4.658925  | -0.461955 |
| O | -2.232796 | 4.340622  | 1.972222  |
| O | -1.660543 | 2.588518  | 0.141544  |
| P | -0.750396 | 1.383521  | 0.778252  |
| O | -1.782911 | 0.469429  | 1.513239  |
| O | 0.341024  | 1.855441  | 1.623713  |
| O | -0.266951 | 0.696978  | -0.544219 |
| C | -1.124253 | 0.253543  | -1.622737 |
| C | -0.258701 | -0.397453 | -2.680499 |
| O | 0.693713  | 0.554544  | -3.205606 |
| C | 0.572385  | -1.593704 | -2.221934 |
| O | 0.772699  | -2.451939 | -3.337014 |
| C | 1.878435  | -0.941204 | -1.775309 |
| O | 2.962184  | -1.837562 | -1.887544 |
| C | 1.982396  | 0.279080  | -2.719665 |
| N | 2.504891  | 1.453793  | -2.014373 |
| C | 1.936176  | 2.702033  | -1.876751 |
| N | 2.657173  | 3.507375  | -1.139991 |
| C | 3.755267  | 2.757087  | -0.767928 |
| C | 4.874164  | 3.077775  | 0.057032  |
| O | 5.148674  | 4.123658  | 0.632833  |
| N | 5.742234  | 1.963900  | 0.176537  |



|   |           |           |           |
|---|-----------|-----------|-----------|
| C | 5.570926  | 0.733625  | -0.397838 |
| N | 6.527052  | -0.193587 | -0.182188 |
| N | 4.534469  | 0.446737  | -1.158670 |
| C | 3.672173  | 1.479283  | -1.306752 |
| H | -1.629284 | 1.120739  | -2.047102 |
| H | -1.862552 | -0.453813 | -1.244461 |
| H | -0.912862 | -0.697054 | -3.500722 |
| H | 0.094734  | -2.131115 | -1.402876 |
| H | 1.624960  | -2.891517 | -3.207997 |
| H | 1.760112  | -0.593843 | -0.749514 |
| H | 3.759216  | -1.317638 | -1.662323 |
| H | 2.654529  | 0.059465  | -3.553016 |
| H | 0.992414  | 2.934093  | -2.338150 |
| H | 7.198432  | -0.079863 | 0.557995  |
| H | 6.340215  | -1.134461 | -0.485581 |
| H | 6.563186  | 2.132197  | 0.742594  |
| H | -2.617049 | 0.250525  | 1.015848  |
| H | -3.245524 | 4.257946  | -1.267866 |
| H | -4.817485 | 1.821102  | -2.119929 |
| H | -6.726434 | 2.462386  | 0.514626  |
| N | -0.406100 | -3.274060 | 1.039933  |
| N | -0.155105 | -4.932139 | -0.454093 |
| N | -3.478057 | -3.682561 | -1.522092 |
| N | -2.598041 | -2.452276 | 0.343974  |
| N | -2.376579 | -5.467761 | -2.512088 |
| C | -0.061838 | -2.269687 | 2.021361  |
| C | 0.527211  | -2.804459 | 3.339561  |
| C | 2.003607  | -2.366672 | 3.264023  |
| C | 1.925292  | -1.078661 | 2.417982  |
| C | 3.174431  | -0.706903 | 1.733508  |
| C | 0.390092  | -4.283365 | 0.541620  |
| C | -1.378095 | -4.313594 | -0.641469 |
| C | -1.550524 | -3.277719 | 0.272274  |
| C | -2.413621 | -4.503514 | -1.577163 |
| C | -3.509566 | -2.725731 | -0.586989 |
| O | -0.132562 | -2.153720 | 4.411996  |
| O | 2.560544  | -2.088481 | 4.535044  |
| O | 0.913934  | -1.403886 | 1.445012  |
| H | -0.977460 | -1.718679 | 2.229251  |
| H | 0.528973  | -2.030618 | 5.110097  |
| H | 0.417687  | -3.888950 | 3.422108  |
| H | 2.971952  | -2.887149 | 4.885665  |
| H | 2.590569  | -3.115923 | 2.728315  |
| H | 1.573301  | -0.264920 | 3.060888  |
| H | 3.513019  | -1.296822 | 0.893670  |
| H | 3.794616  | 0.094255  | 2.105280  |

|   |           |           |           |
|---|-----------|-----------|-----------|
| H | -1.559885 | -6.043828 | -2.617209 |
| H | -3.103857 | -5.519305 | -3.204776 |
| H | 1.365288  | -4.486043 | 0.954524  |
| H | -4.379577 | -2.079531 | -0.596867 |

### 15-PC-complex

|   |           |           |           |
|---|-----------|-----------|-----------|
| P | 5.012249  | -0.992684 | 0.069595  |
| O | 6.445394  | -0.744474 | 0.647157  |
| O | 5.135387  | -1.550228 | -1.407450 |
| O | 4.142780  | 0.178700  | 0.245525  |
| O | 4.507649  | -2.305347 | 0.830969  |
| P | 3.291477  | -3.324012 | 0.529724  |
| O | 3.738679  | -4.154633 | -0.723745 |
| O | 2.965271  | -4.132265 | 1.694832  |
| O | 2.153899  | -2.375200 | -0.037820 |
| P | 1.024644  | -1.399846 | 0.642482  |
| O | 1.854849  | -0.400539 | 1.513307  |
| O | 0.000080  | -2.125395 | 1.385552  |
| O | 0.490876  | -0.680738 | -0.642760 |
| C | 1.305455  | -0.136905 | -1.709219 |
| C | 0.375353  | 0.500052  | -2.723535 |
| O | -0.541444 | -0.521981 | -3.227676 |
| C | -0.510143 | 1.584463  | -2.204387 |
| O | -0.547939 | 2.726607  | -2.939936 |
| C | -1.793011 | 0.935186  | -1.777970 |
| O | -2.894556 | 1.802970  | -1.902722 |
| C | -1.845909 | -0.280636 | -2.754729 |
| N | -2.353167 | -1.485109 | -2.099610 |
| C | -1.760931 | -2.725960 | -1.991501 |
| N | -2.489991 | -3.576509 | -1.316575 |
| C | -3.618904 | -2.866653 | -0.957040 |
| C | -4.756222 | -3.244807 | -0.183510 |
| O | -5.023774 | -4.318320 | 0.342638  |
| N | -5.653473 | -2.156485 | -0.049311 |
| C | -5.487813 | -0.898301 | -0.561197 |
| N | -6.468700 | 0.000427  | -0.336640 |
| N | -4.431714 | -0.556416 | -1.271171 |
| C | -3.545347 | -1.565239 | -1.437976 |
| H | 1.860275  | -0.951874 | -2.173714 |
| H | 1.997442  | 0.605174  | -1.310573 |
| H | 0.980254  | 0.858483  | -3.558583 |
| H | -2.661242 | -1.331577 | 1.400831  |
| H | -1.284954 | 3.271563  | -2.620818 |
| H | -1.694132 | 0.557993  | -0.757244 |
| H | -3.674722 | 1.271268  | -1.651894 |

|   |           |           |           |
|---|-----------|-----------|-----------|
| H | -2.511633 | -0.040490 | -3.588524 |
| H | -0.795689 | -2.917029 | -2.426200 |
| H | -7.163167 | -0.159034 | 0.373094  |
| H | -6.290177 | 0.957350  | -0.590776 |
| H | -6.486164 | -2.364834 | 0.485531  |
| H | 2.633640  | 0.028967  | 1.071195  |
| H | 4.063318  | -3.638795 | -1.479229 |
| H | 5.096786  | -0.881356 | -2.106937 |
| H | 7.104522  | -1.438455 | 0.494873  |
| N | -0.223962 | 2.958624  | 1.114892  |
| N | -0.764622 | 4.556669  | -0.365804 |
| N | 2.803296  | 4.117735  | -1.261867 |
| N | 2.129351  | 2.667930  | 0.530581  |
| N | 1.383335  | 5.651343  | -2.271753 |
| C | -0.369114 | 1.931757  | 2.118026  |
| C | -1.070548 | 2.367683  | 3.425253  |
| C | -2.342902 | 1.488886  | 3.442838  |
| C | -1.928743 | 0.280905  | 2.605981  |
| C | -3.057216 | -0.507104 | 1.991876  |
| C | -1.200941 | 3.771414  | 0.585739  |
| C | 0.577357  | 4.242056  | -0.484403 |
| C | 0.928454  | 3.240197  | 0.414511  |
| C | 1.586956  | 4.683031  | -1.357921 |
| C | 3.001636  | 3.163593  | -0.344024 |
| O | -0.225470 | 2.055683  | 4.519884  |
| O | -2.712483 | 1.086732  | 4.752859  |
| O | -1.143410 | 0.873160  | 1.564037  |
| H | 0.637235  | 1.585712  | 2.352243  |
| H | -0.802287 | 1.716540  | 5.222417  |
| H | -1.301443 | 3.435712  | 3.420442  |
| H | -3.340787 | 1.720916  | 5.117272  |
| H | -3.163630 | 2.011380  | 2.945528  |
| H | -1.295729 | -0.373096 | 3.217578  |
| H | -3.659055 | 0.136570  | 1.349182  |
| H | -3.693463 | -0.915428 | 2.778210  |
| H | 0.448617  | 5.973253  | -2.455168 |
| H | 2.092491  | 5.826404  | -2.963683 |
| H | -2.218207 | 3.729802  | 0.940572  |
| H | 3.992747  | 2.725965  | -0.319907 |

### 16-RC-complex

|   |              |              |              |
|---|--------------|--------------|--------------|
| C | -2.433618000 | 1.318335000  | 0.638423000  |
| C | -3.825050000 | 1.880796000  | 0.324278000  |
| C | -4.814591000 | 0.730998000  | 0.132746000  |
| C | -4.303017000 | -0.219591000 | -0.931439000 |
| C | -2.899639000 | -0.716655000 | -0.577903000 |

|   |              |              |              |
|---|--------------|--------------|--------------|
| O | -2.024652000 | 0.396354000  | -0.366039000 |
| N | -4.360033000 | 2.807978000  | 1.314433000  |
| O | -6.084356000 | 1.224663000  | -0.279532000 |
| O | -5.146544000 | -1.367805000 | -1.063688000 |
| C | -2.270060000 | -1.544696000 | -1.695474000 |
| O | -2.882165000 | -2.822017000 | -1.831196000 |
| O | -2.479609000 | 0.732396000  | 1.909847000  |
| C | -1.205966000 | 0.518613000  | 2.513444000  |
| H | -1.675362000 | 2.107221000  | 0.604198000  |
| H | -3.746357000 | 2.411755000  | -0.627143000 |
| H | -4.916212000 | 0.178504000  | 1.075702000  |
| H | -4.255763000 | 0.320617000  | -1.885413000 |
| H | -2.961263000 | -1.328196000 | 0.328980000  |
| H | -3.899225000 | 3.708240000  | 1.260688000  |
| H | -4.207029000 | 2.442154000  | 2.248481000  |
| H | -6.246858000 | 2.010795000  | 0.264517000  |
| H | -6.030964000 | -1.064056000 | -1.302853000 |
| H | -2.320573000 | -0.976340000 | -2.632979000 |
| H | -1.219589000 | -1.715757000 | -1.461470000 |
| H | -3.840571000 | -2.679281000 | -1.841746000 |
| H | -1.389083000 | 0.081447000  | 3.492556000  |
| H | -0.594258000 | -0.166748000 | 1.923965000  |
| H | -0.667273000 | 1.463972000  | 2.628982000  |
| N | 2.360319000  | 0.035355000  | -0.543381000 |
| N | 1.310508000  | 1.993715000  | -0.233210000 |
| N | 4.795034000  | 3.231138000  | -0.467522000 |
| N | 4.659262000  | 0.843952000  | -0.714582000 |
| N | 2.950958000  | 4.590520000  | -0.102664000 |
| C | 2.576489000  | -1.399315000 | -0.754541000 |
| C | 3.381377000  | -2.037582000 | 0.382943000  |
| C | 2.269252000  | -2.599897000 | 1.282241000  |
| C | 1.221889000  | -3.053032000 | 0.244395000  |
| C | -0.159336000 | -3.150112000 | 0.740881000  |
| C | 1.167818000  | 0.696160000  | -0.359531000 |
| C | 2.670113000  | 2.205174000  | -0.347607000 |
| C | 3.340137000  | 1.000385000  | -0.550268000 |
| C | 3.466539000  | 3.365192000  | -0.305231000 |
| C | 5.302693000  | 2.008039000  | -0.660041000 |
| O | 4.159364000  | -3.085778000 | -0.167326000 |
| O | 2.687818000  | -3.708731000 | 2.054853000  |
| O | 1.321542000  | -2.046101000 | -0.797000000 |
| H | 3.098993000  | -1.523373000 | -1.704703000 |
| H | 4.242064000  | -3.764961000 | 0.518558000  |
| H | 4.011006000  | -1.306653000 | 0.894136000  |
| H | 3.058911000  | -3.393955000 | 2.887731000  |
| H | 1.856575000  | -1.806364000 | 1.909155000  |

|   |              |              |              |
|---|--------------|--------------|--------------|
| H | 1.556423000  | -4.014358000 | -0.159161000 |
| H | -0.727392000 | -2.251959000 | 0.932245000  |
| H | -0.575844000 | -4.105790000 | 1.019977000  |
| H | 1.957478000  | 4.719798000  | -0.026940000 |
| H | 3.550760000  | 5.397057000  | -0.127660000 |
| H | 0.228418000  | 0.172118000  | -0.347089000 |
| H | 6.379279000  | 1.964796000  | -0.787465000 |

### 16-PC-complex

|   |              |              |              |
|---|--------------|--------------|--------------|
| C | -2.563498000 | 1.406065000  | 0.715586000  |
| C | -3.988080000 | 1.863712000  | 0.378266000  |
| C | -4.863261000 | 0.648536000  | 0.064514000  |
| C | -4.229298000 | -0.176959000 | -1.036541000 |
| C | -2.791364000 | -0.559596000 | -0.656507000 |
| O | -2.029931000 | 0.607037000  | -0.333674000 |
| N | -4.643662000 | 2.666540000  | 1.403790000  |
| O | -6.155377000 | 1.057989000  | -0.367444000 |
| O | -4.937197000 | -1.405142000 | -1.251268000 |
| C | -2.061638000 | -1.255102000 | -1.760685000 |
| O | -2.598996000 | -2.404224000 | -2.265585000 |
| O | -2.603740000 | 0.726494000  | 1.939292000  |
| C | -1.331335000 | 0.531157000  | 2.551739000  |
| H | -1.883238000 | 2.262042000  | 0.773145000  |
| H | -3.920841000 | 2.466552000  | -0.530178000 |
| H | -4.948775000 | 0.023426000  | 0.962564000  |
| H | -4.211137000 | 0.412466000  | -1.959996000 |
| H | -2.854970000 | -1.213457000 | 0.229455000  |
| H | -4.265667000 | 3.605754000  | 1.431167000  |
| H | -4.494763000 | 2.250605000  | 2.317307000  |
| H | -6.406166000 | 1.787693000  | 0.220155000  |
| H | -5.827539000 | -1.195936000 | -1.559584000 |
| H | -0.979934000 | -1.242630000 | -1.762985000 |
| H | -0.970270000 | -3.419435000 | -0.272595000 |
| H | -3.561749000 | -2.384425000 | -2.106845000 |
| H | -1.511050000 | 0.037675000  | 3.504304000  |
| H | -0.686521000 | -0.099260000 | 1.936750000  |
| H | -0.831259000 | 1.489380000  | 2.723739000  |
| N | 2.380074000  | 0.042195000  | -0.496414000 |
| N | 1.420970000  | 2.041675000  | -0.158317000 |
| N | 4.947628000  | 3.131287000  | -0.481623000 |
| N | 4.705353000  | 0.751496000  | -0.718319000 |
| N | 3.172591000  | 4.568729000  | -0.075473000 |
| C | 2.546137000  | -1.400202000 | -0.684565000 |
| C | 3.255475000  | -2.069393000 | 0.502852000  |
| C | 2.071926000  | -2.657447000 | 1.290562000  |
| C | 1.105537000  | -3.043603000 | 0.174456000  |

|   |              |              |              |
|---|--------------|--------------|--------------|
| C | -0.343144000 | -3.161934000 | 0.580052000  |
| C | 1.221602000  | 0.750776000  | -0.277476000 |
| C | 2.784595000  | 2.196895000  | -0.308927000 |
| C | 3.398254000  | 0.965064000  | -0.526086000 |
| C | 3.630180000  | 3.322130000  | -0.288981000 |
| C | 5.398715000  | 1.887314000  | -0.681355000 |
| O | 4.082153000  | -3.104139000 | -0.002274000 |
| O | 2.424583000  | -3.805919000 | 2.044383000  |
| O | 1.267679000  | -1.989476000 | -0.801501000 |
| H | 3.126752000  | -1.549355000 | -1.596921000 |
| H | 4.069285000  | -3.816977000 | 0.654087000  |
| H | 3.839562000  | -1.349033000 | 1.079369000  |
| H | 2.741483000  | -3.531673000 | 2.913079000  |
| H | 1.626323000  | -1.887713000 | 1.926160000  |
| H | 1.452335000  | -3.985259000 | -0.265094000 |
| H | -0.703432000 | -2.226923000 | 1.009541000  |
| H | -0.439083000 | -3.948321000 | 1.330352000  |
| H | 2.186381000  | 4.741479000  | 0.008905000  |
| H | 3.804045000  | 5.349342000  | -0.129629000 |
| H | 0.261854000  | 0.266871000  | -0.236669000 |
| H | 6.469483000  | 1.798244000  | -0.831939000 |

#### 17A-RC-complex

|   |              |              |              |
|---|--------------|--------------|--------------|
| O | 4.849630000  | 1.332550000  | -0.499032000 |
| O | 3.067869000  | -0.145500000 | 0.317900000  |
| H | -0.420468000 | -2.018588000 | -1.061116000 |
| O | 4.995387000  | 0.276209000  | 1.887237000  |
| C | 1.402861000  | -2.448684000 | -0.018224000 |
| O | -1.149403000 | 0.284404000  | -0.147486000 |
| H | -1.629536000 | -1.704811000 | 1.128646000  |
| H | 1.835653000  | -2.249687000 | 0.966621000  |
| C | 1.108488000  | 0.238636000  | -1.025514000 |
| H | 1.625128000  | 2.026339000  | -1.649862000 |
| H | -1.146697000 | -3.225935000 | 0.830975000  |
| C | 1.382918000  | -3.939540000 | -0.280163000 |
| H | 5.535310000  | -1.846537000 | 0.247514000  |
| O | 5.379475000  | -1.060771000 | -0.294214000 |
| H | -1.166872000 | 1.169638000  | 0.252119000  |
| C | 2.443470000  | -0.506533000 | -0.944609000 |
| H | 5.774159000  | 1.599277000  | -0.594342000 |
| P | 4.616350000  | 0.104766000  | 0.480404000  |
| O | 1.265175000  | 1.636652000  | -0.845008000 |
| O | 2.274116000  | -1.877953000 | -1.025137000 |
| H | 0.934763000  | -4.151333000 | -1.253045000 |
| C | 0.014948000  | -1.797772000 | -0.074840000 |
| H | 0.685878000  | 0.020800000  | -2.011747000 |

|   |              |              |              |
|---|--------------|--------------|--------------|
| H | 3.103749000  | -0.218431000 | -1.762767000 |
| H | 0.811565000  | -4.455651000 | 0.491114000  |
| C | 0.140264000  | -0.279577000 | 0.031000000  |
| N | -0.808013000 | -2.291798000 | 1.028928000  |
| H | 0.528254000  | -0.023462000 | 1.023580000  |
| H | 2.399016000  | -4.334646000 | -0.269854000 |
| N | -3.519148000 | 1.346783000  | 1.596843000  |
| N | -3.706251000 | -0.845982000 | 2.043318000  |
| N | -5.347274000 | -0.791853000 | -1.276191000 |
| N | -4.608244000 | 1.389520000  | -0.588972000 |
| N | -5.066235000 | -2.702806000 | 0.010598000  |
| C | -3.039367000 | 2.708333000  | 1.657346000  |
| C | -3.092896000 | 3.351108000  | 3.051094000  |
| C | -1.625847000 | 3.290938000  | 3.520271000  |
| C | -0.858277000 | 3.446560000  | 2.201398000  |
| C | 0.525757000  | 2.939907000  | 2.202504000  |
| C | -3.253437000 | 0.305547000  | 2.461649000  |
| C | -4.290533000 | -0.565656000 | 0.821739000  |
| C | -4.177987000 | 0.787253000  | 0.521570000  |
| C | -4.904483000 | -1.377402000 | -0.149259000 |
| C | -5.180479000 | 0.526684000  | -1.426757000 |
| O | -3.505303000 | 4.696648000  | 2.888460000  |
| O | -1.285034000 | 4.344216000  | 4.401122000  |
| O | -1.666121000 | 2.738094000  | 1.238678000  |
| H | -3.645071000 | 3.281818000  | 0.957641000  |
| H | -3.065001000 | 5.210165000  | 3.582828000  |
| H | -3.772422000 | 2.815770000  | 3.718478000  |
| H | -1.432501000 | 4.060455000  | 5.311027000  |
| H | -1.405489000 | 2.318462000  | 3.965213000  |
| H | -0.876712000 | 4.519640000  | 1.947078000  |
| H | 1.160639000  | 3.180006000  | 3.043792000  |
| H | 0.953537000  | 2.520495000  | 1.303767000  |
| H | -4.659853000 | -3.170936000 | 0.801718000  |
| H | -5.426096000 | -3.254811000 | -0.749218000 |
| H | -2.721601000 | 0.459126000  | 3.386318000  |
| H | -5.557957000 | 0.941962000  | -2.355157000 |

#### **17A-PC-complex**

|   |              |              |              |
|---|--------------|--------------|--------------|
| O | 4.082666000  | 0.903210000  | 2.814043000  |
| O | 2.129334000  | 0.428149000  | 1.399959000  |
| H | 1.116370000  | -1.888504000 | -2.054928000 |
| O | 1.705242000  | 1.725624000  | 3.506179000  |
| C | 0.572447000  | -1.514178000 | -0.016398000 |
| O | 1.667749000  | 0.770257000  | -2.733151000 |
| H | -0.526649000 | -0.128137000 | -2.841537000 |
| H | 0.077930000  | -0.725836000 | 0.555948000  |

|   |              |              |              |
|---|--------------|--------------|--------------|
| C | 2.939083000  | -0.034833000 | -0.827109000 |
| H | 4.539345000  | 1.102646000  | -0.815495000 |
| H | -1.174639000 | -1.481654000 | -2.217740000 |
| C | -0.177490000 | -2.817066000 | 0.145996000  |
| H | 1.575243000  | -0.958145000 | 4.002181000  |
| O | 2.454930000  | -0.734397000 | 3.667117000  |
| H | 2.378340000  | 1.428556000  | -2.685863000 |
| C | 2.713714000  | -0.616745000 | 0.575268000  |
| H | 4.537282000  | 0.981966000  | 3.664132000  |
| P | 2.523316000  | 0.656141000  | 2.905933000  |
| O | 3.584189000  | 1.234103000  | -0.810434000 |
| O | 1.891465000  | -1.728504000 | 0.544452000  |
| H | 0.289688000  | -3.606840000 | -0.445473000 |
| C | 0.687288000  | -1.046058000 | -1.477242000 |
| H | 3.579023000  | -0.764109000 | -1.351857000 |
| H | 3.657891000  | -0.930181000 | 1.019038000  |
| H | -1.214907000 | -2.697120000 | -0.164627000 |
| C | 1.641365000  | 0.097943000  | -1.545369000 |
| N | -0.632828000 | -0.657712000 | -1.983989000 |
| H | -1.058216000 | 3.541059000  | -1.972642000 |
| H | -0.176266000 | -3.116434000 | 1.194416000  |
| N | -3.452356000 | 0.874534000  | 1.208547000  |
| N | -3.481370000 | -1.262377000 | 0.528873000  |
| N | -6.047475000 | -1.463771000 | 3.193157000  |
| N | -5.138118000 | 0.750431000  | 2.971412000  |
| N | -5.366901000 | -3.266651000 | 1.899464000  |
| C | -3.065833000 | 2.277779000  | 1.326648000  |
| C | -1.917166000 | 2.506511000  | 2.321300000  |
| C | -0.694635000 | 2.645824000  | 1.393456000  |
| C | -1.302214000 | 3.300246000  | 0.154317000  |
| C | -0.557645000 | 3.053476000  | -1.135071000 |
| C | -2.943060000 | -0.078352000 | 0.355725000  |
| C | -4.388389000 | -1.085933000 | 1.554730000  |
| C | -4.384253000 | 0.237300000  | 1.992099000  |
| C | -5.276562000 | -1.959369000 | 2.208910000  |
| C | -5.937013000 | -0.168012000 | 3.509931000  |
| O | -2.147812000 | 3.724285000  | 3.010303000  |
| O | 0.312936000  | 3.467605000  | 1.942046000  |
| O | -2.627351000 | 2.731610000  | 0.062227000  |
| H | -3.953470000 | 2.821123000  | 1.654715000  |
| H | -1.279065000 | 4.149836000  | 3.093711000  |
| H | -1.827695000 | 1.674396000  | 3.024243000  |
| H | 0.871005000  | 2.909819000  | 2.525729000  |
| H | -0.300042000 | 1.657082000  | 1.141778000  |
| H | -1.392747000 | 4.375017000  | 0.348084000  |
| H | -0.484485000 | 1.985014000  | -1.336855000 |



|   |              |              |              |
|---|--------------|--------------|--------------|
| H | 0.451713000  | 3.460607000  | -1.054464000 |
| H | -4.873944000 | -3.631637000 | 1.103316000  |
| H | -6.081856000 | -3.829575000 | 2.327756000  |
| H | -2.186079000 | 0.150397000  | -0.380159000 |
| H | -6.584519000 | 0.172804000  | 4.311046000  |

**17B-RC-complex**

|   |              |              |              |
|---|--------------|--------------|--------------|
| O | 5.537279000  | 1.003465000  | 0.751739000  |
| O | 3.038042000  | 0.475724000  | 0.634181000  |
| H | 0.830501000  | -1.808552000 | -2.074800000 |
| O | 3.922060000  | 1.357004000  | 2.778625000  |
| C | 2.110930000  | -2.022493000 | -0.369098000 |
| O | -0.591329000 | 0.320609000  | -1.503932000 |
| H | -1.205081000 | -1.837881000 | -0.671191000 |
| H | 2.060198000  | -1.827576000 | 0.706633000  |
| C | 1.820805000  | 0.654170000  | -1.406701000 |
| H | 2.320621000  | 2.526738000  | -1.685463000 |
| H | -0.378506000 | -3.232788000 | -0.598118000 |
| C | 2.441201000  | -3.481810000 | -0.607745000 |
| H | 4.014640000  | -1.252387000 | 2.681111000  |
| O | 4.643511000  | -0.965658000 | 2.007745000  |
| H | -0.936051000 | 1.071482000  | -0.998352000 |
| C | 3.095052000  | 0.129666000  | -0.730252000 |
| P | 4.370111000  | 0.588184000  | 1.580735000  |
| O | 1.633320000  | 2.049212000  | -1.206932000 |
| O | 3.197742000  | -1.263004000 | -0.928944000 |
| H | 2.474658000  | -3.697886000 | -1.677772000 |
| C | 0.780936000  | -1.584827000 | -0.998144000 |
| H | 1.903257000  | 0.429404000  | -2.476234000 |
| H | 3.990735000  | 0.558179000  | -1.184387000 |
| H | 1.698014000  | -4.129182000 | -0.141451000 |
| C | 0.609099000  | -0.076717000 | -0.846212000 |
| N | -0.342385000 | -2.254312000 | -0.337016000 |
| H | 0.531081000  | 0.159283000  | 0.219015000  |
| H | 3.413294000  | -3.718318000 | -0.174062000 |
| N | -3.507127000 | 0.934079000  | 1.070905000  |
| N | -3.828681000 | -1.261688000 | 1.405861000  |
| N | -7.364896000 | -0.179625000 | 1.176347000  |
| N | -5.833775000 | 1.653856000  | 0.907408000  |
| N | -6.694556000 | -2.367006000 | 1.559855000  |
| C | -2.824084000 | 2.208195000  | 0.813649000  |
| C | -2.999313000 | 3.203058000  | 1.958895000  |
| C | -1.797137000 | 2.865197000  | 2.855571000  |
| C | -0.694443000 | 2.495721000  | 1.849306000  |
| C | 0.277270000  | 1.501602000  | 2.340483000  |
| C | -2.942737000 | -0.306806000 | 1.264750000  |

|   |              |              |              |
|---|--------------|--------------|--------------|
| C | -5.047173000 | -0.621999000 | 1.291597000  |
| C | -4.868341000 | 0.742775000  | 1.075837000  |
| C | -6.378162000 | -1.078432000 | 1.342758000  |
| C | -7.044188000 | 1.103216000  | 0.971548000  |
| O | -2.875586000 | 4.507298000  | 1.422245000  |
| O | -1.366815000 | 3.967032000  | 3.635852000  |
| O | -1.442400000 | 1.972075000  | 0.686963000  |
| H | -3.216248000 | 2.615851000  | -0.118861000 |
| H | -2.452575000 | 5.051973000  | 2.102827000  |
| H | -3.957271000 | 3.072890000  | 2.467262000  |
| H | -1.862410000 | 3.982401000  | 4.463259000  |
| H | -2.036932000 | 2.005482000  | 3.485437000  |
| H | -0.197220000 | 3.408323000  | 1.518441000  |
| H | -0.087903000 | 0.587647000  | 2.791916000  |
| H | 1.342195000  | 1.620912000  | 2.204869000  |
| H | -5.974077000 | -3.064573000 | 1.623214000  |
| H | -7.656407000 | -2.658203000 | 1.525455000  |
| H | -1.874584000 | -0.439551000 | 1.275435000  |
| H | -7.883276000 | 1.778578000  | 0.841533000  |

#### 17B-PC-complex

|   |              |              |              |
|---|--------------|--------------|--------------|
| O | 5.230981000  | -0.289955000 | 0.898020000  |
| O | 2.949620000  | 0.424234000  | -0.009852000 |
| H | -0.243835000 | -1.984918000 | -1.576659000 |
| O | 4.235960000  | 2.088769000  | 1.330843000  |
| C | 0.668563000  | -1.296718000 | 0.236637000  |
| O | 0.142148000  | 0.305536000  | -3.087958000 |
| H | -1.315161000 | 0.429336000  | -0.306078000 |
| H | 0.714346000  | -0.365450000 | 0.808359000  |
| C | 2.206959000  | -0.501837000 | -2.095862000 |
| H | 3.618245000  | 0.179746000  | -3.280597000 |
| H | -1.912745000 | -0.290400000 | -1.639295000 |
| C | 0.029180000  | -2.380512000 | 1.077878000  |
| H | 2.737841000  | 0.675187000  | 2.875196000  |
| O | 3.322487000  | 0.012375000  | 2.488980000  |
| H | 0.820487000  | 0.727237000  | -3.638211000 |
| C | 2.819662000  | -0.785427000 | -0.716363000 |
| P | 4.077943000  | 0.614855000  | 1.169978000  |
| O | 2.861722000  | 0.548799000  | -2.810859000 |
| O | 2.015082000  | -1.727443000 | -0.040540000 |
| H | 0.010584000  | -3.325898000 | 0.531122000  |
| C | -0.086848000 | -1.014955000 | -1.074237000 |
| H | 2.303417000  | -1.439156000 | -2.670886000 |
| H | 3.797283000  | -1.257574000 | -0.818600000 |
| H | -0.991946000 | -2.103278000 | 1.334127000  |
| C | 0.764536000  | -0.157962000 | -1.959292000 |

|   |              |              |              |
|---|--------------|--------------|--------------|
| N | -1.410865000 | -0.466476000 | -0.776778000 |
| H | 1.144190000  | 2.151364000  | 1.160249000  |
| H | 0.597512000  | -2.521768000 | 1.998042000  |
| N | -3.372930000 | 0.783748000  | 1.727188000  |
| N | -3.520573000 | -1.286653000 | 2.585947000  |
| N | -5.687846000 | -1.735490000 | -0.383974000 |
| N | -4.804546000 | 0.494165000  | -0.229507000 |
| N | -5.250509000 | -3.397832000 | 1.175105000  |
| C | -2.899498000 | 2.134532000  | 1.496873000  |
| C | -2.979289000 | 3.061679000  | 2.718482000  |
| C | -1.525769000 | 3.078749000  | 3.229222000  |
| C | -0.714232000 | 2.924499000  | 1.943359000  |
| C | 0.641669000  | 2.283126000  | 2.117440000  |
| C | -2.989362000 | -0.099544000 | 2.713693000  |
| C | -4.292330000 | -1.197282000 | 1.442614000  |
| C | -4.206124000 | 0.076719000  | 0.888934000  |
| C | -5.078848000 | -2.133233000 | 0.747284000  |
| C | -5.520360000 | -0.473991000 | -0.797007000 |
| O | -3.356305000 | 4.349998000  | 2.261956000  |
| O | -1.182230000 | 4.294152000  | 3.873963000  |
| O | -1.531171000 | 2.090444000  | 1.100808000  |
| H | -3.510886000 | 2.532889000  | 0.688202000  |
| H | -2.884463000 | 4.990069000  | 2.816618000  |
| H | -3.688979000 | 2.690877000  | 3.462196000  |
| H | -1.396078000 | 4.228377000  | 4.812173000  |
| H | -1.347486000 | 2.226788000  | 3.889773000  |
| H | -0.615577000 | 3.912656000  | 1.480794000  |
| H | 0.528671000  | 1.305083000  | 2.590198000  |
| H | 1.267860000  | 2.914001000  | 2.750209000  |
| H | -4.721742000 | -3.742150000 | 1.957430000  |
| H | -5.736072000 | -4.056633000 | 0.590489000  |
| H | -2.313046000 | 0.192135000  | 3.500512000  |
| H | -6.035146000 | -0.211494000 | -1.715258000 |

### 17C-RC-complex

|   |           |           |           |
|---|-----------|-----------|-----------|
| O | 5.467433  | 1.271335  | -0.750364 |
| O | 3.148381  | 0.222699  | -0.474486 |
| H | 2.088010  | -3.795340 | 0.076548  |
| O | 3.357857  | 2.717290  | -0.506711 |
| C | 2.739351  | -2.068540 | 1.168406  |
| O | 0.445226  | -2.837645 | -1.689338 |
| H | -0.301393 | -3.314461 | 0.552506  |
| H | 2.326022  | -1.100409 | 1.461556  |
| C | 2.635561  | -1.770971 | -1.682174 |
| H | 3.022418  | -0.991422 | -3.443115 |
| H | 0.557529  | -3.647078 | 1.888719  |

|   |           |           |           |
|---|-----------|-----------|-----------|
| C | 3.209329  | -2.820503 | 2.397841  |
| O | 4.262780  | 1.427574  | 1.504981  |
| H | 0.320247  | -2.372752 | -2.525987 |
| C | 3.642204  | -1.021559 | -0.793752 |
| P | 4.158095  | 1.521840  | -0.011736 |
| O | 2.262501  | -1.040926 | -2.852431 |
| O | 3.896300  | -1.850198 | 0.350129  |
| H | 3.607751  | -3.800137 | 2.122998  |
| C | 1.666276  | -2.821164 | 0.368181  |
| H | 3.092086  | -2.725347 | -1.969194 |
| H | 4.613747  | -0.942140 | -1.289965 |
| H | 2.392872  | -2.960799 | 3.107353  |
| C | 1.359117  | -2.051674 | -0.908720 |
| N | 0.434414  | -2.960079 | 1.154087  |
| H | 0.894351  | -1.097247 | -0.649425 |
| H | 3.995998  | -2.254473 | 2.898365  |
| N | -2.544561 | 0.248832  | -0.234264 |
| N | -3.282106 | -1.581245 | 0.835177  |
| N | -6.459926 | -0.502042 | -0.734024 |
| N | -4.633000 | 0.960995  | -1.281896 |
| N | -6.252234 | -2.354361 | 0.648518  |
| C | -1.611669 | 1.253826  | -0.773594 |
| C | -1.907136 | 2.653346  | -0.234811 |
| C | -1.044344 | 2.680411  | 1.036465  |
| C | 0.195986  | 1.862881  | 0.644476  |
| C | 0.828292  | 1.129058  | 1.755609  |
| C | -2.242683 | -0.825158 | 0.571025  |
| C | -4.326358 | -0.980564 | 0.160709  |
| C | -3.885608 | 0.155050  | -0.517262 |
| C | -5.690898 | -1.298511 | 0.029298  |
| C | -5.899691 | 0.555955  | -1.332777 |
| O | -1.436995 | 3.596369  | -1.182791 |
| O | -0.647633 | 3.993899  | 1.402930  |
| O | -0.308302 | 0.929140  | -0.382668 |
| H | -1.692751 | 1.229194  | -1.861694 |
| H | -1.078938 | 4.342108  | -0.678131 |
| H | -2.970583 | 2.798761  | -0.032503 |
| H | -1.340727 | 4.394540  | 1.941066  |
| H | -1.580612 | 2.190893  | 1.853326  |
| H | 0.929901  | 2.504637  | 0.155629  |
| H | 0.218511  | 0.500024  | 2.392490  |
| H | 1.903526  | 1.141179  | 1.872755  |
| H | -5.675840 | -3.017385 | 1.136671  |
| H | -7.205759 | -2.599574 | 0.443125  |
| H | -1.236037 | -1.008513 | 0.910337  |
| H | -6.569686 | 1.158102  | -1.937593 |

**17C-PC-complex**

|   |              |              |              |
|---|--------------|--------------|--------------|
| O | 4.624461000  | 2.194219000  | -0.877848000 |
| O | 2.427278000  | 1.056817000  | -0.195756000 |
| H | 0.823324000  | -2.746421000 | -1.384925000 |
| O | 3.025638000  | 3.272243000  | 0.817680000  |
| C | 1.990942000  | -1.751994000 | 0.112077000  |
| O | -1.039111000 | -0.732357000 | -1.792459000 |
| H | -1.295715000 | -2.365307000 | -0.050395000 |
| H | 1.811710000  | -1.064841000 | 0.943111000  |
| C | 1.253960000  | 0.036566000  | -2.029011000 |
| H | 1.145064000  | 1.624485000  | -3.181341000 |
| H | -0.235227000 | -3.424197000 | 0.573861000  |
| C | 2.624134000  | -3.028922000 | 0.626984000  |
| O | 4.387772000  | 1.207463000  | 1.471710000  |
| H | -1.146044000 | 0.092175000  | -2.291657000 |
| C | 2.566589000  | 0.161540000  | -1.229665000 |
| P | 3.745712000  | 2.016229000  | 0.352911000  |
| O | 0.680965000  | 1.294888000  | -2.403584000 |
| O | 2.926346000  | -1.159937000 | -0.797433000 |
| H | 2.801864000  | -3.728477000 | -0.193075000 |
| C | 0.643744000  | -1.987675000 | -0.595991000 |
| H | 1.501304000  | -0.524199000 | -2.947977000 |
| H | 3.381143000  | 0.462628000  | -1.892185000 |
| H | 1.982632000  | -3.510949000 | 1.365800000  |
| C | 0.226563000  | -0.722585000 | -1.264309000 |
| N | -0.372501000 | -2.442522000 | 0.363024000  |
| H | 1.330704000  | 1.075725000  | 2.057413000  |
| H | 3.578688000  | -2.803321000 | 1.103834000  |
| N | -3.166487000 | 1.111227000  | 1.067661000  |
| N | -3.636331000 | -1.062904000 | 0.778689000  |
| N | -6.999032000 | 0.354963000  | 0.135099000  |
| N | -5.377296000 | 2.055062000  | 0.642543000  |
| N | -6.501079000 | -1.909888000 | 0.043271000  |
| C | -2.410546000 | 2.336777000  | 1.353151000  |
| C | -2.709867000 | 2.879191000  | 2.753893000  |
| C | -1.608297000 | 2.202186000  | 3.586717000  |
| C | -0.427811000 | 2.172764000  | 2.616022000  |
| C | 0.566302000  | 1.056716000  | 2.832099000  |
| C | -2.705922000 | -0.183842000 | 1.062806000  |
| C | -4.776138000 | -0.307785000 | 0.582626000  |
| C | -4.503200000 | 1.048103000  | 0.756315000  |
| C | -6.103232000 | -0.641249000 | 0.254785000  |
| C | -6.594299000 | 1.615786000  | 0.329322000  |
| O | -2.528707000 | 4.284451000  | 2.732020000  |

|   |              |              |              |
|---|--------------|--------------|--------------|
| O | -1.255786000 | 2.941954000  | 4.745593000  |
| O | -1.035314000 | 2.047677000  | 1.305903000  |
| H | -2.675065000 | 3.069572000  | 0.589793000  |
| H | -2.156559000 | 4.531227000  | 3.592069000  |
| H | -3.719248000 | 2.618562000  | 3.081281000  |
| H | -1.840024000 | 2.692595000  | 5.471398000  |
| H | -1.912659000 | 1.185010000  | 3.847166000  |
| H | 0.077993000  | 3.142250000  | 2.662853000  |
| H | 0.070484000  | 0.084523000  | 2.819519000  |
| H | 1.048060000  | 1.186707000  | 3.803164000  |
| H | -5.871309000 | -2.672961000 | 0.219538000  |
| H | -7.477077000 | -2.107417000 | -0.097455000 |
| H | -1.670157000 | -0.414092000 | 1.242938000  |
| H | -7.361970000 | 2.374364000  | 0.217783000  |

### 18-RC-complex

|   |              |              |              |
|---|--------------|--------------|--------------|
| H | 3.978761000  | 1.747926000  | -1.506103000 |
| C | -3.358441000 | 2.549210000  | -0.529176000 |
| C | 0.064983000  | 2.133281000  | -1.227315000 |
| C | 3.907726000  | 1.110108000  | -0.616165000 |
| C | 1.256673000  | 2.427131000  | 1.004731000  |
| N | 0.091747000  | 2.388131000  | 0.122739000  |
| N | -1.141774000 | 2.150162000  | -1.737768000 |
| O | 3.376681000  | 1.873038000  | 3.030572000  |
| N | -1.695591000 | 2.821878000  | 1.727446000  |
| C | -1.214231000 | 2.566893000  | 0.505951000  |
| C | 3.524670000  | 1.980827000  | 0.575404000  |
| C | -1.966134000 | 2.415970000  | -0.661176000 |
| O | 6.667706000  | -1.452085000 | 0.006283000  |
| O | 5.147257000  | 0.494427000  | -0.347417000 |
| O | 4.995929000  | -1.507429000 | -1.939373000 |
| C | -3.022179000 | 2.931100000  | 1.723376000  |
| H | 3.122123000  | 0.371669000  | -0.801618000 |
| H | -3.864597000 | 1.966253000  | -2.398166000 |
| H | 1.085991000  | 0.909009000  | 2.577954000  |
| N | -3.861274000 | 2.812728000  | 0.688167000  |
| H | 3.589410000  | 0.188659000  | 1.796064000  |
| C | 1.605923000  | 1.079845000  | 1.637870000  |
| O | 2.382970000  | 2.807854000  | 0.238919000  |
| H | 4.357572000  | 2.646707000  | 0.814216000  |
| O | 4.155528000  | -1.718522000 | 0.467434000  |
| H | 1.037381000  | 3.183443000  | 1.762123000  |
| H | 1.360380000  | 0.284205000  | 0.938450000  |
| C | 3.112556000  | 1.169884000  | 1.806500000  |
| H | -3.488000000 | 3.136673000  | 2.681312000  |
| H | 0.975112000  | 1.949615000  | -1.771260000 |

|   |              |              |              |
|---|--------------|--------------|--------------|
| N | -4.206889000 | 2.449787000  | -1.582525000 |
| H | -5.177727000 | 2.283987000  | -1.361411000 |
| P | 5.245565000  | -1.197585000 | -0.466974000 |
| H | 4.332640000  | 1.937259000  | 3.140277000  |
| N | -2.006949000 | -1.183573000 | -0.363522000 |
| N | -3.666336000 | -0.814387000 | -1.828769000 |
| N | -5.547759000 | -0.312170000 | 1.321286000  |
| N | -3.242861000 | -0.862332000 | 1.717630000  |
| N | -6.455291000 | -0.033730000 | -0.798896000 |
| C | -0.676300000 | -1.470362000 | 0.158109000  |
| C | -0.351679000 | -2.969140000 | 0.256477000  |
| C | 0.502605000  | -3.205005000 | -1.001357000 |
| C | 1.268532000  | -1.876203000 | -1.130792000 |
| C | 1.755732000  | -1.541679000 | -2.478359000 |
| C | -2.397857000 | -1.103917000 | -1.679387000 |
| C | -4.145711000 | -0.694837000 | -0.538064000 |
| C | -3.127278000 | -0.917733000 | 0.387533000  |
| C | -5.404438000 | -0.358288000 | -0.012875000 |
| C | -4.482944000 | -0.556725000 | 2.093345000  |
| O | 0.418566000  | -3.178744000 | 1.427869000  |
| O | 1.418680000  | -4.276530000 | -0.849282000 |
| O | 0.275432000  | -0.891778000 | -0.707915000 |
| H | -0.634249000 | -1.021620000 | 1.152266000  |
| H | 1.076738000  | -3.856329000 | 1.209836000  |
| H | -1.261020000 | -3.575980000 | 0.274281000  |
| H | 0.983581000  | -5.102049000 | -1.093434000 |
| H | -0.143159000 | -3.357539000 | -1.869905000 |
| H | 2.106213000  | -1.879417000 | -0.424447000 |
| H | 1.043591000  | -1.298608000 | -3.257367000 |
| H | 2.822420000  | -1.531934000 | -2.662853000 |
| H | -6.415345000 | -0.245786000 | -1.781696000 |
| H | -7.364859000 | 0.044887000  | -0.374455000 |
| H | -1.690396000 | -1.243704000 | -2.478751000 |
| H | -4.656699000 | -0.496278000 | 3.162366000  |

### 18-PC-complex

|   |              |             |              |
|---|--------------|-------------|--------------|
| H | 1.909841000  | 1.728331000 | -2.057598000 |
| C | -4.768062000 | 1.312747000 | 2.009455000  |
| C | -2.002274000 | 1.290447000 | -0.165552000 |
| C | 2.038933000  | 1.624928000 | -0.975054000 |
| C | -0.740784000 | 3.487450000 | 0.295166000  |
| N | -1.846715000 | 2.502770000 | 0.459430000  |
| N | -3.063702000 | 0.630455000 | 0.233725000  |
| O | 2.441974000  | 3.006056000 | 1.999495000  |
| N | -3.161525000 | 3.618809000 | 2.190325000  |
| C | -2.890866000 | 2.617492000 | 1.343635000  |

|   |              |              |              |
|---|--------------|--------------|--------------|
| C | 1.444251000  | 2.841352000  | -0.282417000 |
| C | -3.633898000 | 1.446777000  | 1.189913000  |
| O | 5.520632000  | 0.571560000  | 0.231096000  |
| O | 3.424476000  | 1.543753000  | -0.684878000 |
| O | 3.535238000  | -0.986958000 | -0.296561000 |
| C | -4.256469000 | 3.377659000  | 2.906626000  |
| H | 1.507845000  | 0.722699000  | -0.658437000 |
| H | -5.276094000 | -0.580243000 | 1.453645000  |
| H | -0.253438000 | 3.829239000  | 2.482653000  |
| N | -5.057492000 | 2.306025000  | 2.865854000  |
| H | 1.016427000  | 1.654222000  | 1.412999000  |
| C | 0.112808000  | 3.545857000  | 1.509144000  |
| O | 0.090289000  | 3.044280000  | -0.759841000 |
| H | 2.046308000  | 3.727097000  | -0.511938000 |
| O | 3.419072000  | 0.603592000  | 1.685618000  |
| H | -1.214487000 | 4.437938000  | 0.034803000  |
| H | -0.343180000 | -1.536045000 | -0.626202000 |
| C | 1.297359000  | 2.703192000  | 1.243482000  |
| H | -4.535508000 | 4.140919000  | 3.624894000  |
| H | -1.294408000 | 0.956632000  | -0.903332000 |
| N | -5.587347000 | 0.240330000  | 1.945643000  |
| H | -6.264566000 | 0.114090000  | 2.679630000  |
| P | 4.033384000  | 0.319556000  | 0.283528000  |
| H | 2.970022000  | 2.156312000  | 1.964827000  |
| N | -0.880613000 | 0.102093000  | 3.878394000  |
| N | -2.977409000 | -0.214267000 | 4.620601000  |
| N | -2.373609000 | 3.161566000  | 6.018252000  |
| N | -0.474472000 | 2.326381000  | 4.806197000  |
| N | -4.346664000 | 1.966653000  | 6.298216000  |
| C | 0.343088000  | -0.104862000 | 3.117842000  |
| C | 1.227804000  | -1.280634000 | 3.586317000  |
| C | 0.906555000  | -2.370635000 | 2.542927000  |
| C | 0.661224000  | -1.542696000 | 1.279685000  |
| C | -0.195114000 | -2.201027000 | 0.225618000  |
| C | -1.984643000 | -0.718453000 | 3.933130000  |
| C | -2.513111000 | 1.017684000  | 5.040771000  |
| C | -1.212717000 | 1.234088000  | 4.587116000  |
| C | -3.098896000 | 2.054584000  | 5.787240000  |
| C | -1.131139000 | 3.232490000  | 5.525820000  |
| O | 2.601500000  | -0.967031000 | 3.574302000  |
| O | 1.938139000  | -3.326917000 | 2.414349000  |
| O | -0.017661000 | -0.360992000 | 1.771948000  |
| H | 0.903582000  | 0.825679000  | 3.211544000  |
| H | 2.869924000  | -0.394037000 | 2.780896000  |
| H | 0.969426000  | -1.587267000 | 4.600133000  |
| H | 2.759126000  | -2.846104000 | 2.608510000  |



|   |              |              |              |
|---|--------------|--------------|--------------|
| H | -0.004296000 | -2.907436000 | 2.822654000  |
| H | 1.627239000  | -1.254415000 | 0.855315000  |
| H | -1.172855000 | -2.473293000 | 0.628291000  |
| H | 0.302456000  | -3.104930000 | -0.130738000 |
| H | -4.965717000 | 1.268141000  | 5.920936000  |
| H | -4.771297000 | 2.812492000  | 6.642684000  |
| H | -1.999337000 | -1.671129000 | 3.430001000  |
| H | -0.595334000 | 4.151118000  | 5.740144000  |

### 19-RC-complex

|   |              |              |              |
|---|--------------|--------------|--------------|
| H | -1.073375000 | -2.214566000 | -1.252256000 |
| C | -3.864944000 | -3.371993000 | 0.196118000  |
| H | -4.631981000 | -2.704389000 | -0.200524000 |
| H | -4.237916000 | -4.391951000 | 0.163417000  |
| H | -3.651289000 | -3.095804000 | 1.224991000  |
| C | -2.627037000 | -3.289535000 | -0.659614000 |
| H | -3.116956000 | 0.656936000  | 0.885385000  |
| H | -1.226659000 | -0.276768000 | -0.261725000 |
| H | -0.514203000 | -0.576653000 | 3.252344000  |
| H | -3.966467000 | -0.874872000 | 0.914971000  |
| O | -2.299866000 | -4.219127000 | -1.396387000 |
| C | -1.350408000 | -1.317763000 | 1.619107000  |
| C | -1.905159000 | -0.982883000 | 0.215025000  |
| N | -1.888331000 | -2.144635000 | -0.660782000 |
| S | -3.967744000 | 0.103473000  | -1.291177000 |
| C | -3.260596000 | -0.277464000 | 0.346397000  |
| O | -1.442988000 | -2.453205000 | 2.076874000  |
| N | -0.753264000 | -0.322958000 | 2.303935000  |
| C | -5.285477000 | 1.236082000  | -0.758593000 |
| H | -5.967392000 | 0.727347000  | -0.078380000 |
| H | -4.863970000 | 2.119922000  | -0.279537000 |
| H | -5.824899000 | 1.537801000  | -1.655443000 |
| C | -0.699970000 | 1.097142000  | 1.995085000  |
| H | -1.605179000 | 1.612981000  | 2.322463000  |
| H | 0.153641000  | 1.530564000  | 2.512315000  |
| H | -0.561978000 | 1.264143000  | 0.929294000  |
| N | -5.328717000 | -1.275779000 | 3.319574000  |
| N | -5.386842000 | -3.491053000 | 3.678846000  |
| N | -7.656130000 | -3.314943000 | 0.755812000  |
| N | -6.840775000 | -1.150994000 | 1.406796000  |
| N | -7.094077000 | -5.278744000 | 1.853679000  |
| C | -4.968478000 | 0.127006000  | 3.462731000  |
| C | -5.616043000 | 0.827233000  | 4.665499000  |
| C | -4.488377000 | 0.806474000  | 5.712124000  |
| C | -3.228572000 | 0.953066000  | 4.828669000  |
| C | -1.986673000 | 0.423641000  | 5.416109000  |

|   |              |              |              |
|---|--------------|--------------|--------------|
| C | -4.883322000 | -2.346561000 | 4.063813000  |
| C | -6.213310000 | -3.166495000 | 2.620241000  |
| C | -6.189555000 | -1.795500000 | 2.379509000  |
| C | -6.993351000 | -3.943904000 | 1.743182000  |
| C | -7.544116000 | -1.986988000 | 0.645474000  |
| O | -5.913303000 | 2.157982000  | 4.282612000  |
| O | -4.561557000 | 1.882741000  | 6.626162000  |
| O | -3.564025000 | 0.216887000  | 3.631839000  |
| H | -5.282228000 | 0.618499000  | 2.541817000  |
| H | -5.808937000 | 2.708428000  | 5.073395000  |
| H | -6.514525000 | 0.302433000  | 5.000453000  |
| H | -5.100088000 | 1.623029000  | 7.383292000  |
| H | -4.471288000 | -0.154435000 | 6.231013000  |
| H | -3.123344000 | 2.016342000  | 4.585481000  |
| H | -1.823397000 | -0.645325000 | 5.441892000  |
| H | -1.311148000 | 1.077610000  | 5.946388000  |
| H | -6.558961000 | -5.775232000 | 2.544295000  |
| H | -7.609013000 | -5.800181000 | 1.165043000  |
| H | -4.172608000 | -2.216813000 | 4.862521000  |
| H | -8.094888000 | -1.536634000 | -0.173284000 |

### 19-PC-complex

|   |              |              |              |
|---|--------------|--------------|--------------|
| H | -0.810629000 | -1.545129000 | -0.650327000 |
| C | -0.007545000 | -1.080184000 | 2.573891000  |
| H | -0.915913000 | -0.650564000 | 3.000309000  |
| H | 0.368228000  | -1.838571000 | 3.255261000  |
| H | 0.733711000  | -0.294710000 | 2.452482000  |
| C | -0.334078000 | -1.748773000 | 1.261996000  |
| H | -1.267673000 | 2.355642000  | 0.560127000  |
| H | -0.990830000 | 0.588803000  | -1.038203000 |
| H | 2.195733000  | 2.285491000  | -0.882196000 |
| H | -0.723272000 | 1.358054000  | 1.901603000  |
| O | -0.399718000 | -2.974317000 | 1.175556000  |
| C | 0.969673000  | 0.888061000  | -0.196091000 |
| C | -0.506516000 | 0.439964000  | -0.073690000 |
| N | -0.617877000 | -0.988050000 | 0.168676000  |
| S | -2.942743000 | 0.760415000  | 1.207549000  |
| C | -1.231675000 | 1.337007000  | 0.941049000  |
| O | 1.866765000  | 0.238337000  | 0.331412000  |
| N | 1.222435000  | 2.014894000  | -0.890257000 |
| C | -3.490718000 | 1.888434000  | 2.363209000  |
| H | -2.558911000 | -2.855950000 | 2.790592000  |
| H | -2.940064000 | 2.794768000  | 2.566665000  |
| H | -4.437780000 | 1.684455000  | 2.840017000  |
| C | 0.302954000  | 2.914791000  | -1.571786000 |
| H | -0.016722000 | 3.734558000  | -0.924817000 |

|   |               |              |              |
|---|---------------|--------------|--------------|
| H | 0.807877000   | 3.336027000  | -2.439143000 |
| H | -0.576885000  | 2.384021000  | -1.926979000 |
| N | -7.260097000  | -2.301902000 | 2.756834000  |
| N | -8.163840000  | -4.342446000 | 2.519800000  |
| N | -11.242475000 | -2.299755000 | 2.240433000  |
| N | -9.282892000  | -0.949155000 | 2.578579000  |
| N | -11.201277000 | -4.615834000 | 2.120451000  |
| C | -6.269203000  | -1.248092000 | 2.977587000  |
| C | -6.200479000  | -0.800577000 | 4.444805000  |
| C | -5.008656000  | -1.619935000 | 4.972443000  |
| C | -4.091324000  | -1.686084000 | 3.753286000  |
| C | -3.147175000  | -2.863052000 | 3.707944000  |
| C | -7.059646000  | -3.661628000 | 2.704975000  |
| C | -9.152472000  | -3.380782000 | 2.449781000  |
| C | -8.610034000  | -2.105602000 | 2.594918000  |
| C | -10.546398000 | -3.450487000 | 2.263765000  |
| C | -10.586984000 | -1.143356000 | 2.394912000  |
| O | -5.909032000  | 0.585916000  | 4.474861000  |
| O | -4.333277000  | -0.984299000 | 6.045923000  |
| O | -4.997299000  | -1.747045000 | 2.629300000  |
| H | -6.547354000  | -0.406980000 | 2.340819000  |
| H | -5.319116000  | 0.732289000  | 5.230058000  |
| H | -7.133596000  | -1.012820000 | 4.972194000  |
| H | -4.757320000  | -1.228082000 | 6.877275000  |
| H | -5.341466000  | -2.622348000 | 5.254296000  |
| H | -3.530417000  | -0.748269000 | 3.696644000  |
| H | -3.696267000  | -3.804501000 | 3.766916000  |
| H | -2.459228000  | -2.807740000 | 4.553258000  |
| H | -10.696064000 | -5.483427000 | 2.080334000  |
| H | -12.190263000 | -4.615296000 | 1.938943000  |
| H | -6.071587000  | -4.079984000 | 2.791696000  |
| H | -11.203287000 | -0.250887000 | 2.366597000  |

### 20-RC-complex

|   |              |              |              |
|---|--------------|--------------|--------------|
| N | -0.829246000 | 1.326277000  | -2.990257000 |
| H | -4.466139000 | 3.312515000  | -4.200173000 |
| H | 3.227339000  | -1.932918000 | -0.974081000 |
| O | -3.559362000 | -0.882085000 | -1.825919000 |
| H | -5.016707000 | 0.400591000  | -0.880242000 |
| C | -2.713862000 | 0.257321000  | -1.764502000 |
| C | 4.284473000  | 0.202287000  | -1.473256000 |
| H | 4.348712000  | -0.074548000 | -0.421030000 |
| C | -4.008337000 | 1.759134000  | -3.126264000 |
| N | 2.899883000  | 0.494639000  | -1.851583000 |
| H | -1.526179000 | 3.270151000  | -3.569335000 |
| O | 3.447520000  | 2.722147000  | -2.154071000 |

|   |              |              |              |
|---|--------------|--------------|--------------|
| N | 0.522038000  | 3.113213000  | -3.000531000 |
| O | -4.725157000 | 1.320868000  | -0.799044000 |
| H | -1.996039000 | 0.184988000  | -0.947588000 |
| C | 1.971884000  | -0.525684000 | -1.860653000 |
| H | -3.064935000 | -1.664801000 | -1.559278000 |
| H | -3.052031000 | 2.339608000  | -1.302901000 |
| C | 1.224139000  | 1.993641000  | -2.588339000 |
| C | 0.398351000  | 0.880532000  | -2.576281000 |
| C | -2.029319000 | 0.495036000  | -3.119292000 |
| C | 2.586339000  | 1.848445000  | -2.202572000 |
| N | 2.389719000  | -1.764883000 | -1.516397000 |
| H | -1.730905000 | -0.444758000 | -3.582909000 |
| C | -0.690301000 | 2.681850000  | -3.228326000 |
| O | -4.046063000 | 3.137049000  | -3.348926000 |
| H | -4.959219000 | 1.292138000  | -3.393008000 |
| O | -2.985291000 | 1.137597000  | -3.927465000 |
| H | 4.679034000  | -0.607511000 | -2.084993000 |
| H | 1.659813000  | -2.451972000 | -1.431259000 |
| C | -3.626087000 | 1.484071000  | -1.661845000 |
| N | 0.709185000  | -0.374441000 | -2.218390000 |
| H | 4.869161000  | 1.098564000  | -1.638623000 |
| N | 6.061586000  | -4.397019000 | -0.504652000 |
| N | 8.282973000  | -4.257988000 | -0.791778000 |
| N | 7.593789000  | -7.186763000 | -2.956319000 |
| N | 5.599336000  | -6.326379000 | -1.926739000 |
| N | 9.703899000  | -6.287113000 | -2.617695000 |
| C | 4.720900000  | -4.127466000 | -0.004868000 |
| C | 4.415708000  | -4.813225000 | 1.331232000  |
| C | 4.745087000  | -3.707695000 | 2.348678000  |
| C | 4.275994000  | -2.439518000 | 1.601779000  |
| C | 4.915787000  | -1.179094000 | 2.008838000  |
| C | 7.235132000  | -3.743034000 | -0.200722000 |
| C | 7.780946000  | -5.315373000 | -1.526055000 |
| C | 6.401811000  | -5.418532000 | -1.361650000 |
| C | 8.382850000  | -6.265335000 | -2.374480000 |
| C | 6.279671000  | -7.164102000 | -2.706849000 |
| O | 3.033283000  | -5.115956000 | 1.356004000  |
| O | 4.025926000  | -3.833976000 | 3.558197000  |
| O | 4.585797000  | -2.729551000 | 0.211346000  |
| H | 4.022747000  | -4.467812000 | -0.769789000 |
| H | 2.747334000  | -5.060065000 | 2.280076000  |
| H | 5.023219000  | -5.711456000 | 1.469108000  |
| H | 4.530143000  | -4.379367000 | 4.173608000  |
| H | 5.822613000  | -3.665950000 | 2.524424000  |
| H | 3.188621000  | -2.379960000 | 1.717529000  |
| H | 5.904601000  | -0.933764000 | 1.647011000  |

|   |              |              |              |
|---|--------------|--------------|--------------|
| H | 4.457397000  | -0.558693000 | 2.764418000  |
| H | 10.312555000 | -5.601496000 | -2.206581000 |
| H | 10.088332000 | -6.976544000 | -3.240555000 |
| H | 7.243262000  | -2.882274000 | 0.446603000  |
| H | 5.696839000  | -7.931025000 | -3.206210000 |

### 20-PC-complex

|   |              |              |              |
|---|--------------|--------------|--------------|
| N | -0.712393000 | 1.382453000  | -2.994129000 |
| H | -4.108660000 | 3.803959000  | -4.069380000 |
| H | 2.885183000  | -2.363209000 | -1.011172000 |
| O | -3.652547000 | -0.571258000 | -1.889552000 |
| H | -4.957465000 | 0.818179000  | -0.875856000 |
| C | -2.690032000 | 0.467913000  | -1.791501000 |
| C | 4.215155000  | -0.298487000 | -1.640271000 |
| H | 3.659051000  | -0.683717000 | 1.349345000  |
| C | -3.823824000 | 2.161954000  | -3.070246000 |
| N | 2.925750000  | 0.096662000  | -1.926602000 |
| H | -1.202683000 | 3.410420000  | -3.486469000 |
| O | 3.693456000  | 2.278156000  | -2.136034000 |
| N | 0.818340000  | 3.017011000  | -2.937707000 |
| O | -4.567933000 | 1.696979000  | -0.756875000 |
| H | -1.977181000 | 0.283905000  | -0.988076000 |
| C | 1.865511000  | -0.816857000 | -1.948741000 |
| H | -3.239915000 | -1.414915000 | -1.673666000 |
| H | -2.797769000 | 2.550918000  | -1.233796000 |
| C | 1.400158000  | 1.813793000  | -2.575925000 |
| C | 0.461385000  | 0.794095000  | -2.605641000 |
| C | -1.995751000 | 0.690198000  | -3.143752000 |
| C | 2.737695000  | 1.518988000  | -2.214240000 |
| N | 2.134173000  | -2.108061000 | -1.643070000 |
| H | -1.803308000 | -0.254798000 | -3.650421000 |
| C | -0.432313000 | 2.724106000  | -3.176435000 |
| O | -3.707206000 | 3.543859000  | -3.230984000 |
| H | -4.823549000 | 1.817750000  | -3.345046000 |
| O | -2.883234000 | 1.465974000  | -3.911026000 |
| H | 4.454082000  | -1.338550000 | -1.539001000 |
| H | 1.314989000  | -2.692401000 | -1.588456000 |
| C | -3.463899000 | 1.780034000  | -1.624253000 |
| N | 0.636111000  | -0.497418000 | -2.291636000 |
| H | 4.959280000  | 0.474412000  | -1.605591000 |
| N | 5.939916000  | -4.382545000 | -0.569935000 |
| N | 7.990014000  | -3.682284000 | -1.154123000 |
| N | 8.024622000  | -7.016720000 | -2.769794000 |
| N | 5.954338000  | -6.580179000 | -1.629161000 |
| N | 9.789895000  | -5.514419000 | -2.847171000 |
| C | 4.616417000  | -4.411554000 | 0.041519000  |

|   |              |              |              |
|---|--------------|--------------|--------------|
| C | 4.596691000  | -5.081725000 | 1.421168000  |
| C | 4.693141000  | -3.874040000 | 2.371218000  |
| C | 3.896627000  | -2.806394000 | 1.624520000  |
| C | 4.251347000  | -1.375731000 | 1.947857000  |
| C | 6.887603000  | -3.384994000 | -0.513627000 |
| C | 7.765210000  | -4.947829000 | -1.659667000 |
| C | 6.495846000  | -5.400354000 | -1.307886000 |
| C | 8.549847000  | -5.824856000 | -2.433379000 |
| C | 6.787194000  | -7.318245000 | -2.360233000 |
| O | 3.348600000  | -5.734007000 | 1.570971000  |
| O | 4.098012000  | -4.115979000 | 3.634026000  |
| O | 4.181871000  | -3.075057000 | 0.227719000  |
| H | 3.954741000  | -4.942029000 | -0.643667000 |
| H | 3.110066000  | -5.672617000 | 2.508312000  |
| H | 5.426058000  | -5.783862000 | 1.535823000  |
| H | 4.753151000  | -4.504611000 | 4.225790000  |
| H | 5.735898000  | -3.564429000 | 2.478611000  |
| H | 2.831773000  | -2.987102000 | 1.799445000  |
| H | 5.308515000  | -1.184099000 | 1.758795000  |
| H | 4.043736000  | -1.184780000 | 3.001766000  |
| H | 10.216039000 | -4.644890000 | -2.579222000 |
| H | 10.327416000 | -6.185052000 | -3.369019000 |
| H | 6.690944000  | -2.458116000 | -0.002439000 |
| H | 6.419710000  | -8.292640000 | -2.664400000 |

### **21A-RC-complex**

|   |              |              |              |
|---|--------------|--------------|--------------|
| N | 0.401141000  | -0.888357000 | -1.413481000 |
| N | -1.048448000 | 0.791008000  | -1.747595000 |
| N | -3.328459000 | -1.625898000 | -0.109018000 |
| N | -1.096731000 | -2.489675000 | -0.335317000 |
| N | -3.965103000 | 0.484876000  | -0.831534000 |
| C | 1.624534000  | -1.668731000 | -1.443811000 |
| C | 1.936618000  | -2.307658000 | -2.809093000 |
| C | 3.054461000  | -1.403582000 | -3.361735000 |
| C | 3.789674000  | -0.997277000 | -2.065011000 |
| C | 4.593633000  | 0.231408000  | -2.158673000 |
| C | 0.185109000  | 0.382258000  | -1.903432000 |
| C | -1.690051000 | -0.265016000 | -1.130060000 |
| C | -0.806561000 | -1.318909000 | -0.911920000 |
| C | -3.014809000 | -0.455905000 | -0.693718000 |
| C | -2.374091000 | -2.552549000 | 0.034674000  |
| O | 2.424946000  | -3.616502000 | -2.578461000 |
| O | 3.937867000  | -2.084037000 | -4.229266000 |
| O | 2.714019000  | -0.812198000 | -1.123694000 |
| H | 1.510991000  | -2.453122000 | -0.694845000 |
| H | 3.057023000  | -3.810281000 | -3.287154000 |

|   |              |              |              |
|---|--------------|--------------|--------------|
| H | 1.053565000  | -2.324483000 | -3.452929000 |
| H | 3.630665000  | -1.989182000 | -5.138585000 |
| H | 2.626033000  | -0.518200000 | -3.836346000 |
| H | 4.409115000  | -1.848516000 | -1.759873000 |
| H | 4.100502000  | 1.194364000  | -2.190530000 |
| H | 5.636028000  | 0.168357000  | -2.434969000 |
| H | -3.766671000 | 1.342558000  | -1.315947000 |
| H | -4.911240000 | 0.284952000  | -0.556015000 |
| H | 0.984051000  | 0.976803000  | -2.314325000 |
| H | -2.687116000 | -3.474071000 | 0.514110000  |
| H | 0.122107000  | 2.840621000  | -0.059483000 |
| C | 2.022260000  | 2.121032000  | 0.638927000  |
| P | 3.770701000  | 2.549507000  | 0.657311000  |
| O | 1.508556000  | 3.306364000  | -1.456729000 |
| O | 4.598902000  | 1.204346000  | 0.902306000  |
| H | 1.682427000  | 1.977064000  | 1.666088000  |
| H | 2.459888000  | 3.503701000  | -1.488183000 |
| O | 4.201880000  | 3.298307000  | -0.550201000 |
| H | 1.947525000  | 1.161770000  | 0.125181000  |
| O | 3.953275000  | 3.313518000  | 2.042487000  |
| H | 1.221978000  | 4.133001000  | 0.434354000  |
| C | 1.161173000  | 3.167859000  | -0.081969000 |
| H | 4.797590000  | 3.779114000  | 2.128488000  |
| H | 4.758750000  | 0.718257000  | 0.072085000  |

### **21A-PC-complex**

|   |              |              |              |
|---|--------------|--------------|--------------|
| N | -0.030291000 | -1.140235000 | -1.444150000 |
| N | -1.190696000 | 0.752550000  | -1.769142000 |
| N | -3.967384000 | -1.458739000 | -0.707232000 |
| N | -1.855955000 | -2.606655000 | -0.749686000 |
| N | -4.227503000 | 0.771524000  | -1.290809000 |
| C | 1.081224000  | -2.080550000 | -1.419314000 |
| C | 1.405087000  | -2.689382000 | -2.795440000 |
| C | 2.637812000  | -1.876465000 | -3.230252000 |
| C | 3.333096000  | -1.614014000 | -1.896450000 |
| C | 4.268639000  | -0.429790000 | -1.871067000 |
| C | -0.010220000 | 0.186400000  | -1.812243000 |
| C | -2.042346000 | -0.254271000 | -1.357776000 |
| C | -1.340004000 | -1.439562000 | -1.150559000 |
| C | -3.428366000 | -0.296232000 | -1.115681000 |
| C | -3.169308000 | -2.521398000 | -0.550745000 |
| O | 1.748987000  | -4.051779000 | -2.607506000 |
| O | 3.499522000  | -2.597759000 | -4.095382000 |
| O | 2.240832000  | -1.394255000 | -0.980327000 |
| H | 0.802964000  | -2.873705000 | -0.724024000 |
| H | 2.436239000  | -4.258108000 | -3.259145000 |

|   |              |              |              |
|---|--------------|--------------|--------------|
| H | 0.561897000  | -2.590983000 | -3.483756000 |
| H | 3.217213000  | -2.467069000 | -5.008346000 |
| H | 2.324359000  | -0.931707000 | -3.682548000 |
| H | 3.866073000  | -2.526677000 | -1.606048000 |
| H | 3.741564000  | 0.487441000  | -2.134858000 |
| H | 5.076495000  | -0.595235000 | -2.585666000 |
| H | -3.834554000 | 1.667828000  | -1.518825000 |
| H | -5.198223000 | 0.715061000  | -1.034395000 |
| H | 0.908614000  | 0.686476000  | -2.068814000 |
| H | -3.661760000 | -3.429470000 | -0.219060000 |
| H | 4.708661000  | -0.308368000 | -0.880836000 |
| C | 3.766075000  | 2.385388000  | 0.733541000  |
| P | 3.957594000  | 4.178431000  | 0.773157000  |
| O | 2.289928000  | 2.434317000  | -1.241730000 |
| O | 5.416157000  | 4.512190000  | 1.331968000  |
| H | 3.781791000  | 1.992074000  | 1.750034000  |
| H | 2.708859000  | 3.313758000  | -1.334965000 |
| O | 3.661068000  | 4.793584000  | -0.545325000 |
| H | 4.666878000  | 2.008931000  | 0.222312000  |
| O | 3.024599000  | 4.620089000  | 1.981445000  |
| H | 2.098085000  | 0.993322000  | 0.200329000  |
| C | 2.514308000  | 1.975214000  | 0.025718000  |
| H | 2.866243000  | 5.573274000  | 2.039461000  |
| H | 6.085379000  | 4.594355000  | 0.637913000  |

### 21B-RC-complex

|   |           |           |           |
|---|-----------|-----------|-----------|
| N | 0.315222  | -0.950672 | -1.347023 |
| N | -1.080388 | 0.798555  | -1.496469 |
| N | -3.495741 | -1.780132 | -0.381606 |
| N | -1.271226 | -2.659162 | -0.619724 |
| N | -4.057814 | 0.426877  | -0.826378 |
| C | 1.522865  | -1.759168 | -1.435568 |
| C | 1.763125  | -2.355416 | -2.832356 |
| C | 2.823774  | -1.407794 | -3.419347 |
| C | 3.642459  | -1.043920 | -2.160526 |
| C | 4.413330  | 0.205244  | -2.249013 |
| C | 0.154358  | 0.385158  | -1.643959 |
| C | -1.776995 | -0.321710 | -1.087916 |
| C | -0.926750 | -1.420414 | -0.988545 |
| C | -3.127724 | -0.543074 | -0.760152 |
| C | -2.568651 | -2.743963 | -0.333895 |
| O | 2.295081  | -3.657707 | -2.668927 |
| O | 3.658267  | -2.033543 | -4.373960 |
| O | 2.638685  | -0.940953 | -1.129497 |
| H | 1.416505  | -2.564345 | -0.707452 |
| H | 2.890867  | -3.813942 | -3.417108 |



|   |           |           |           |
|---|-----------|-----------|-----------|
| H | 0.842748  | -2.376431 | -3.421775 |
| H | 3.279702  | -1.918671 | -5.253508 |
| H | 2.348564  | -0.512291 | -3.825851 |
| H | 4.301463  | -1.894565 | -1.948850 |
| H | 3.925134  | 1.160698  | -2.111351 |
| H | 5.417336  | 0.180214  | -2.647347 |
| H | -3.787809 | 1.374864  | -1.022247 |
| H | -4.992452 | 0.242973  | -0.503991 |
| H | 0.985350  | 1.014300  | -1.920886 |
| H | -2.925870 | -3.719602 | -0.021416 |
| H | 0.412783  | 2.754097  | 0.055452  |
| C | 2.392322  | 2.160688  | 0.697991  |
| P | 4.136941  | 2.723080  | 0.629064  |
| O | 1.734750  | 3.218154  | -1.415875 |
| O | 4.987764  | 1.330296  | 0.802810  |
| H | 2.098070  | 2.050347  | 1.744081  |
| H | 2.711055  | 3.327855  | -1.456444 |
| O | 4.371473  | 3.252911  | -0.771294 |
| H | 2.330041  | 1.177008  | 0.228007  |
| O | 4.478873  | 3.576200  | 1.809026  |
| H | 1.472342  | 4.111406  | 0.448181  |
| C | 1.438510  | 3.118860  | -0.021268 |
| H | 4.974106  | 0.819685  | -0.022139 |

### **21B-PC-complex**

|   |           |           |           |
|---|-----------|-----------|-----------|
| N | 0.114404  | -1.146339 | -1.615855 |
| N | -1.061211 | 0.694715  | -1.099418 |
| N | -3.365574 | -1.866200 | 0.265639  |
| N | -1.397769 | -2.840863 | -0.711750 |
| N | -3.772688 | 0.417323  | 0.319910  |
| C | 1.209384  | -1.972894 | -2.070961 |
| C | 1.727759  | -1.633722 | -3.483874 |
| C | 3.101088  | -0.994219 | -3.197347 |
| C | 3.531877  | -1.711008 | -1.920279 |
| C | 4.573069  | -0.996638 | -1.094277 |
| C | 0.032685  | 0.229034  | -1.644172 |
| C | -1.744039 | -0.431438 | -0.677716 |
| C | -1.028152 | -1.585996 | -0.984401 |
| C | -2.974967 | -0.611117 | -0.019451 |
| C | -2.573439 | -2.884518 | -0.088799 |
| O | 1.882332  | -2.845569 | -4.204484 |
| O | 4.040409  | -1.224173 | -4.236134 |
| O | 2.307622  | -1.813984 | -1.173486 |
| H | 0.846044  | -3.000912 | -2.054813 |
| H | 2.670295  | -2.736016 | -4.759116 |

|   |           |           |           |
|---|-----------|-----------|-----------|
| H | 1.048274  | -0.960178 | -4.011899 |
| H | 3.994279  | -0.501300 | -4.872629 |
| H | 2.983253  | 0.073776  | -2.998585 |
| H | 3.880924  | -2.715567 | -2.191171 |
| H | 4.262819  | 0.025966  | -0.876569 |
| H | 5.510452  | -0.955104 | -1.651609 |
| H | -3.463544 | 1.364481  | 0.188755  |
| H | -4.604857 | 0.245786  | 0.857842  |
| H | 0.815506  | 0.828981  | -2.080593 |
| H | -2.940966 | -3.872505 | 0.168000  |
| H | 4.754860  | -1.530566 | -0.160660 |
| C | 2.120537  | 2.895814  | -0.080872 |
| P | 3.924037  | 3.151673  | 0.180634  |
| O | 2.403287  | 2.570268  | -2.495821 |
| O | 4.253127  | 2.259231  | 1.514589  |
| H | 1.552180  | 3.508966  | 0.618994  |
| H | 3.324268  | 2.420144  | -2.143106 |
| O | 4.598118  | 2.496739  | -1.010679 |
| H | 1.912270  | 1.840720  | 0.165191  |
| O | 4.234297  | 4.568754  | 0.532040  |
| H | 0.693879  | 3.430336  | -1.740347 |
| C | 1.720942  | 3.198002  | -1.487240 |
| H | 4.320598  | 1.320011  | 1.301789  |

### 21C-RC-complex

|   |              |              |              |
|---|--------------|--------------|--------------|
| N | 1.143251000  | 0.081786000  | -0.025200000 |
| N | 0.408787000  | 2.127091000  | -0.576908000 |
| N | -2.262438000 | 1.151448000  | 1.809828000  |
| N | -0.611386000 | -0.571766000 | 1.532632000  |
| N | -2.196346000 | 3.204773000  | 0.736795000  |
| C | 1.943165000  | -1.135705000 | -0.024345000 |
| C | 1.564035000  | -2.108032000 | -1.149105000 |
| C | 2.593622000  | -1.762025000 | -2.237258000 |
| C | 3.843923000  | -1.431940000 | -1.390098000 |
| C | 4.840005000  | -0.561172000 | -2.034564000 |
| C | 1.335649000  | 1.224742000  | -0.768139000 |
| C | -0.454332000 | 1.557186000  | 0.341445000  |
| C | -0.015547000 | 0.279717000  | 0.688884000  |
| C | -1.645403000 | 2.007931000  | 0.959214000  |
| C | -1.727328000 | -0.048651000 | 2.039180000  |
| O | 1.764005000  | -3.428077000 | -0.675683000 |
| O | 2.874700000  | -2.845061000 | -3.102606000 |
| O | 3.303605000  | -0.788939000 | -0.215269000 |
| H | 1.796044000  | -1.610188000 | 0.946196000  |
| H | 2.029835000  | -3.963630000 | -1.438166000 |

|   |              |              |              |
|---|--------------|--------------|--------------|
| H | 0.532177000  | -1.958194000 | -1.477756000 |
| H | 2.258775000  | -2.828118000 | -3.844780000 |
| H | 2.272318000  | -0.878887000 | -2.794102000 |
| H | 4.295395000  | -2.390336000 | -1.105638000 |
| H | 5.619345000  | -0.992148000 | -2.645118000 |
| H | 4.719446000  | 0.512746000  | -2.002016000 |
| H | -1.686956000 | 4.023506000  | 0.320502000  |
| H | -2.998488000 | 3.424300000  | 1.307115000  |
| H | 2.191060000  | 1.334351000  | -1.413277000 |
| H | -2.275218000 | -0.679717000 | 2.732334000  |
| H | 2.655743000  | 4.559912000  | 1.836681000  |
| C | 0.627585000  | 5.334204000  | 1.959100000  |
| P | -0.593366000 | 6.380772000  | 1.026817000  |
| O | 2.587323000  | 6.382096000  | 0.919048000  |
| O | -1.698345000 | 6.745702000  | 2.010778000  |
| H | 0.171959000  | 4.360917000  | 2.164649000  |
| H | 1.829333000  | 6.986289000  | 0.690556000  |
| O | 0.243877000  | 7.586784000  | 0.546327000  |
| H | 0.821559000  | 5.815781000  | 2.923285000  |
| O | -1.083211000 | 5.514004000  | -0.151181000 |
| H | 1.780844000  | 4.558652000  | 0.305992000  |
| C | 1.953819000  | 5.136020000  | 1.223922000  |

### 21C-PC-complex

|   |              |              |              |
|---|--------------|--------------|--------------|
| N | 1.153609000  | 0.278180000  | -0.019669000 |
| N | 0.365730000  | 2.264854000  | -0.698817000 |
| N | -2.327186000 | 1.329642000  | 1.678144000  |
| N | -0.617970000 | -0.351765000 | 1.528050000  |
| N | -2.280742000 | 3.342010000  | 0.523412000  |
| C | 2.001206000  | -0.904114000 | 0.079238000  |
| C | 1.634557000  | -2.000050000 | -0.932958000 |
| C | 2.656264000  | -1.754983000 | -2.057157000 |
| C | 3.884630000  | -1.287171000 | -1.278837000 |
| C | 4.861373000  | -0.435882000 | -2.054407000 |
| C | 1.325105000  | 1.384000000  | -0.820994000 |
| C | -0.497664000 | 1.717668000  | 0.232886000  |
| C | -0.026838000 | 0.474815000  | 0.656775000  |
| C | -1.710205000 | 2.163762000  | 0.807907000  |
| C | -1.764355000 | 0.157242000  | 1.977199000  |
| O | 1.859930000  | -3.259530000 | -0.322312000 |
| O | 2.967730000  | -2.929176000 | -2.789559000 |
| O | 3.338691000  | -0.523295000 | -0.183160000 |
| H | 1.894259000  | -1.286632000 | 1.095096000  |
| H | 2.170676000  | -3.856414000 | -1.019717000 |
| H | 0.598040000  | -1.906094000 | -1.266406000 |
| H | 2.340182000  | -3.027458000 | -3.515298000 |

|   |              |              |              |
|---|--------------|--------------|--------------|
| H | 2.301550000  | -0.960361000 | -2.718927000 |
| H | 4.388969000  | -2.172946000 | -0.877093000 |
| H | 5.265902000  | -1.014344000 | -2.886508000 |
| H | 5.690315000  | -0.123254000 | -1.418936000 |
| H | -1.733911000 | 4.161217000  | 0.168417000  |
| H | -3.089398000 | 3.569072000  | 1.082303000  |
| H | 2.190910000  | 1.484164000  | -1.453321000 |
| H | -2.313463000 | -0.458408000 | 2.682989000  |
| H | 4.370156000  | 0.453407000  | -2.453246000 |
| C | 0.344603000  | 5.256541000  | 2.181902000  |
| P | -0.600849000 | 6.450028000  | 1.087316000  |
| O | 2.456138000  | 5.891502000  | 1.099289000  |
| O | -1.769047000 | 6.978251000  | 1.905964000  |
| H | -0.249443000 | 4.355713000  | 2.348043000  |
| H | 1.819358000  | 6.671842000  | 0.951814000  |
| O | 0.476776000  | 7.517498000  | 0.769528000  |
| H | 0.427533000  | 5.774670000  | 3.148796000  |
| O | -1.023948000 | 5.663390000  | -0.165252000 |
| H | 1.896523000  | 3.902446000  | 1.265333000  |
| C | 1.689911000  | 4.896212000  | 1.651097000  |

### 22A-RC-complex

|   |              |              |              |
|---|--------------|--------------|--------------|
| N | 0.373334000  | -1.438036000 | -1.881094000 |
| N | -0.381523000 | 0.062897000  | -3.374575000 |
| N | -1.475769000 | 1.751164000  | -0.259835000 |
| N | -0.330915000 | -0.310240000 | 0.173395000  |
| N | -1.857938000 | 2.571059000  | -2.392646000 |
| C | 1.043101000  | -2.584177000 | -1.289151000 |
| C | 1.244787000  | -3.766760000 | -2.235554000 |
| C | 2.672760000  | -3.532426000 | -2.766133000 |
| C | 3.391819000  | -2.936246000 | -1.535378000 |
| C | 4.518931000  | -2.036374000 | -1.832028000 |
| C | 0.251961000  | -1.066067000 | -3.207431000 |
| C | -0.691374000 | 0.480490000  | -2.094466000 |
| C | -0.225787000 | -0.431665000 | -1.155723000 |
| C | -1.353539000 | 1.619979000  | -1.595546000 |
| C | -0.965998000 | 0.809190000  | 0.532413000  |
| O | 1.196743000  | -4.943119000 | -1.450251000 |
| O | 3.317119000  | -4.729440000 | -3.151096000 |
| O | 2.346022000  | -2.206822000 | -0.840195000 |
| H | 0.450836000  | -2.883403000 | -0.425752000 |
| H | 1.786918000  | -5.586418000 | -1.871159000 |
| H | 0.496632000  | -3.801374000 | -3.030916000 |
| H | 3.133833000  | -4.907072000 | -4.081350000 |
| H | 2.661926000  | -2.807415000 | -3.582745000 |
| H | 3.710998000  | -3.773453000 | -0.907706000 |

|   |              |              |              |
|---|--------------|--------------|--------------|
| H | 4.319518000  | -1.037383000 | -2.194692000 |
| H | 5.535496000  | -2.396967000 | -1.791604000 |
| H | -1.763361000 | 2.507345000  | -3.391217000 |
| H | -2.304167000 | 3.378088000  | -1.991057000 |
| H | 0.641855000  | -1.674084000 | -4.006481000 |
| H | -1.044806000 | 0.979056000  | 1.599145000  |
| H | 2.904960000  | 0.204038000  | -0.345801000 |
| H | 1.912180000  | -1.381274000 | 2.622590000  |
| H | 1.050811000  | -0.756353000 | 1.341179000  |
| C | 2.795817000  | 0.324543000  | 1.795878000  |
| N | 2.009485000  | -0.952617000 | 1.705175000  |
| C | 2.813088000  | 0.991807000  | 0.405205000  |
| C | 2.156747000  | 1.225957000  | 2.885940000  |
| O | 0.989455000  | 0.922423000  | 3.230549000  |
| H | 1.851704000  | 1.477362000  | 0.232600000  |
| H | 3.807207000  | 0.051321000  | 2.091863000  |
| O | 2.868311000  | 2.167602000  | 3.287024000  |
| C | 3.933900000  | 1.979813000  | 0.214573000  |
| C | 3.696122000  | 3.350329000  | 0.156234000  |
| C | 5.251344000  | 1.536772000  | 0.074242000  |
| C | 4.733562000  | 4.258075000  | -0.029844000 |
| H | 2.684186000  | 3.721694000  | 0.262498000  |
| C | 6.299135000  | 2.427526000  | -0.108412000 |
| H | 5.463312000  | 0.473882000  | 0.103103000  |
| C | 6.040930000  | 3.796311000  | -0.159709000 |
| H | 4.527595000  | 5.321452000  | -0.072930000 |
| H | 7.317137000  | 2.076686000  | -0.218579000 |
| O | 7.107208000  | 4.633444000  | -0.344137000 |
| H | 6.808425000  | 5.551081000  | -0.363391000 |
| H | 2.434401000  | -1.613835000 | 1.045421000  |

### 22A-PC-complex

|   |              |              |              |
|---|--------------|--------------|--------------|
| N | 0.390417000  | -1.436444000 | -1.749860000 |
| N | -1.409099000 | -1.951341000 | -2.992045000 |
| N | -3.138058000 | -0.743955000 | 0.058114000  |
| N | -0.750752000 | -0.593569000 | 0.243636000  |
| N | -4.222635000 | -1.553092000 | -1.822372000 |
| C | 1.764786000  | -1.254356000 | -1.340184000 |
| C | 2.768802000  | -2.275618000 | -1.912085000 |
| C | 3.602072000  | -1.426696000 | -2.898691000 |
| C | 3.549953000  | -0.035180000 | -2.276688000 |
| C | 3.789223000  | 1.119406000  | -3.215879000 |
| C | -0.104909000 | -1.911145000 | -2.949153000 |
| C | -1.812235000 | -1.465517000 | -1.762562000 |
| C | -0.711669000 | -1.127495000 | -0.984438000 |
| C | -3.081224000 | -1.260169000 | -1.185562000 |

|   |              |              |              |
|---|--------------|--------------|--------------|
| C | -2.002331000 | -0.439113000 | 0.683603000  |
| O | 3.572710000  | -2.752050000 | -0.849745000 |
| O | 4.948777000  | -1.858725000 | -2.986201000 |
| O | 2.206077000  | 0.043797000  | -1.754758000 |
| H | 1.776295000  | -1.320979000 | -0.252048000 |
| H | 4.485958000  | -2.773656000 | -1.176028000 |
| H | 2.265644000  | -3.112316000 | -2.400696000 |
| H | 5.025538000  | -2.536580000 | -3.668336000 |
| H | 3.123290000  | -1.416177000 | -3.881093000 |
| H | 4.262094000  | -0.005859000 | -1.447751000 |
| H | 3.061466000  | 1.111740000  | -4.028797000 |
| H | 4.792373000  | 1.039931000  | -3.636720000 |
| H | -4.207987000 | -1.943488000 | -2.748324000 |
| H | -5.106376000 | -1.391551000 | -1.369963000 |
| H | 0.549979000  | -2.213526000 | -3.750132000 |
| H | -2.106367000 | -0.003786000 | 1.671259000  |
| H | 3.716723000  | 2.067525000  | -2.682195000 |
| H | 1.597070000  | 1.400847000  | -0.465753000 |
| H | 0.438451000  | 0.869661000  | 0.583940000  |
| C | 2.056444000  | 1.894089000  | 1.558525000  |
| N | 1.107068000  | 1.643887000  | 0.402980000  |
| C | 3.401429000  | 2.270061000  | 1.045667000  |
| C | 1.438851000  | 3.056038000  | 2.405602000  |
| O | 0.558285000  | 3.736347000  | 1.823170000  |
| H | 3.512458000  | 3.291317000  | 0.698595000  |
| H | 2.078608000  | 0.991327000  | 2.162582000  |
| O | 1.907238000  | 3.193711000  | 3.548288000  |
| C | 4.491671000  | 1.395782000  | 0.879948000  |
| C | 5.683362000  | 1.868486000  | 0.261756000  |
| C | 4.473792000  | 0.025154000  | 1.258717000  |
| C | 6.755671000  | 1.038439000  | 0.019442000  |
| H | 5.737065000  | 2.906366000  | -0.042751000 |
| C | 5.547868000  | -0.803648000 | 1.020928000  |
| H | 3.593451000  | -0.395702000 | 1.723887000  |
| C | 6.695140000  | -0.309990000 | 0.393374000  |
| H | 7.645351000  | 1.422875000  | -0.465734000 |
| H | 5.509762000  | -1.848920000 | 1.296476000  |
| O | 7.712746000  | -1.184137000 | 0.167445000  |
| H | 8.442298000  | -0.742265000 | -0.285404000 |
| H | 0.577999000  | 2.527241000  | 0.318601000  |

### **22B-RC-complex**

|   |              |              |              |
|---|--------------|--------------|--------------|
| H | -1.697705000 | -2.669302000 | -1.534431000 |
| H | -2.283837000 | -1.336098000 | -0.838106000 |
| C | -0.476188000 | -1.037960000 | -1.692168000 |
| N | -1.807120000 | -1.668997000 | -1.673516000 |

|   |              |              |              |
|---|--------------|--------------|--------------|
| C | -0.660929000 | 0.445626000  | -2.069058000 |
| C | 0.290622000  | -1.174830000 | -0.349066000 |
| O | -0.368372000 | -0.929366000 | 0.696006000  |
| H | -1.342844000 | 0.895367000  | -1.345738000 |
| H | 0.119392000  | -1.526060000 | -2.466728000 |
| H | -1.161815000 | 0.474819000  | -3.040259000 |
| O | 1.499397000  | -1.508815000 | -0.407987000 |
| C | 0.610616000  | 1.250811000  | -2.123858000 |
| C | 1.054388000  | 1.973092000  | -1.015770000 |
| C | 1.396258000  | 1.285542000  | -3.278077000 |
| C | 2.236147000  | 2.705667000  | -1.052362000 |
| H | 0.477530000  | 1.958576000  | -0.100108000 |
| C | 2.580153000  | 2.010448000  | -3.332438000 |
| H | 1.075071000  | 0.737331000  | -4.156708000 |
| C | 3.003478000  | 2.725216000  | -2.214398000 |
| H | 2.559363000  | 3.262542000  | -0.179800000 |
| H | 3.179669000  | 2.034263000  | -4.233637000 |
| O | 4.174728000  | 3.429871000  | -2.317308000 |
| H | 4.358604000  | 3.884424000  | -1.485983000 |
| N | -2.854493000 | 4.723310000  | 0.604610000  |
| N | -4.734131000 | 5.949168000  | 0.568873000  |
| N | -2.244760000 | 8.685613000  | 0.359092000  |
| N | -1.207750000 | 6.519936000  | 0.472295000  |
| N | -4.540681000 | 9.013015000  | 0.392011000  |
| C | -1.966855000 | 3.566697000  | 0.691243000  |
| C | -1.604323000 | 3.196691000  | 2.136760000  |
| C | -2.611439000 | 2.076047000  | 2.446026000  |
| C | -2.720887000 | 1.364390000  | 1.080225000  |
| C | -3.958861000 | 0.605423000  | 0.847809000  |
| C | -4.229615000 | 4.741946000  | 0.632223000  |
| C | -3.631795000 | 6.778679000  | 0.501287000  |
| C | -2.453657000 | 6.035098000  | 0.522595000  |
| C | -3.488646000 | 8.176722000  | 0.414460000  |
| C | -1.201191000 | 7.848444000  | 0.389365000  |
| O | -0.279451000 | 2.696962000  | 2.150177000  |
| O | -2.141004000 | 1.163769000  | 3.421147000  |
| O | -2.620541000 | 2.451487000  | 0.124196000  |
| H | -1.065896000 | 3.818387000  | 0.130737000  |
| H | -0.257107000 | 1.972802000  | 2.794115000  |
| H | -1.704819000 | 4.054658000  | 2.806815000  |
| H | -2.371101000 | 1.490369000  | 4.299194000  |
| H | -3.574383000 | 2.504719000  | 2.733263000  |
| H | -1.849381000 | 0.705909000  | 0.978493000  |
| H | -4.844089000 | 1.103091000  | 0.476438000  |
| H | -4.019369000 | -0.428644000 | 1.153626000  |
| H | -5.479224000 | 8.654593000  | 0.398935000  |

|   |              |              |             |
|---|--------------|--------------|-------------|
| H | -4.392876000 | 10.003067000 | 0.298209000 |
| H | -4.797100000 | 3.827905000  | 0.678982000 |
| H | -0.224743000 | 8.318887000  | 0.340696000 |

### 22B-PC-complex

|   |              |              |              |
|---|--------------|--------------|--------------|
| H | -1.624926000 | -1.211929000 | -0.839922000 |
| H | -2.193240000 | 0.235751000  | -1.336181000 |
| C | -1.301378000 | -0.904841000 | -2.808802000 |
| N | -2.122874000 | -0.742480000 | -1.591661000 |
| C | -0.623094000 | 0.350487000  | -3.272915000 |
| C | -0.253677000 | -2.071658000 | -2.627201000 |
| O | -0.015381000 | -2.449698000 | -1.455282000 |
| H | -2.750177000 | -0.224776000 | 1.226948000  |
| H | -1.943114000 | -1.240975000 | -3.627374000 |
| H | -0.773711000 | 0.636594000  | -4.307584000 |
| O | 0.250236000  | -2.511035000 | -3.685090000 |
| C | 0.165974000  | 1.210179000  | -2.478360000 |
| C | 0.572723000  | 0.892707000  | -1.152815000 |
| C | 0.568883000  | 2.481020000  | -2.976184000 |
| C | 1.254323000  | 1.803213000  | -0.373198000 |
| H | 0.347365000  | -0.084135000 | -0.751000000 |
| C | 1.235577000  | 3.396608000  | -2.187509000 |
| H | 0.304890000  | 2.750647000  | -3.992219000 |
| C | 1.549602000  | 3.080181000  | -0.862115000 |
| H | 1.539260000  | 1.549760000  | 0.639463000  |
| H | 1.487403000  | 4.378780000  | -2.567115000 |
| O | 2.119777000  | 4.039249000  | -0.072505000 |
| H | 1.830701000  | 3.886959000  | 0.847068000  |
| N | -2.454418000 | 4.597454000  | 0.766650000  |
| N | -4.439919000 | 5.637281000  | 0.880233000  |
| N | -2.573910000 | 8.154884000  | -1.097264000 |
| N | -1.215978000 | 6.254089000  | -0.531555000 |
| N | -4.791893000 | 8.382191000  | -0.457714000 |
| C | -1.417209000 | 3.603402000  | 0.980688000  |
| C | -0.778418000 | 3.659035000  | 2.385590000  |
| C | -1.370057000 | 2.412172000  | 3.074245000  |
| C | -1.588894000 | 1.455703000  | 1.903120000  |
| C | -2.635086000 | 0.389477000  | 2.120033000  |
| C | -3.754633000 | 4.574731000  | 1.218669000  |
| C | -3.544366000 | 6.412209000  | 0.168381000  |
| C | -2.304314000 | 5.783062000  | 0.086085000  |
| C | -3.655747000 | 7.664194000  | -0.466307000 |
| C | -1.443817000 | 7.438248000  | -1.094817000 |
| O | 0.635203000  | 3.534219000  | 2.277254000  |
| O | -0.481051000 | 1.835172000  | 4.016556000  |
| O | -1.999756000 | 2.319778000  | 0.830503000  |



|   |              |              |              |
|---|--------------|--------------|--------------|
| H | -0.658196000 | 3.783574000  | 0.220956000  |
| H | 0.922369000  | 2.959674000  | 3.005436000  |
| H | -1.030003000 | 4.589386000  | 2.897403000  |
| H | -0.639422000 | 2.221522000  | 4.886137000  |
| H | -2.327409000 | 2.664320000  | 3.536040000  |
| H | -0.627786000 | 0.995989000  | 1.649113000  |
| H | -3.599286000 | 0.838495000  | 2.363988000  |
| H | -2.329388000 | -0.256825000 | 2.944041000  |
| H | -5.622933000 | 8.018815000  | -0.025624000 |
| H | -4.837620000 | 9.255074000  | -0.954633000 |
| H | -4.137831000 | 3.734087000  | 1.772956000  |
| H | -0.606839000 | 7.885117000  | -1.620988000 |

### **22C-RC-complex**

|   |              |              |              |
|---|--------------|--------------|--------------|
| N | 0.526411000  | -1.365868000 | -1.824030000 |
| N | -1.261998000 | -1.808805000 | -3.109230000 |
| N | -2.870545000 | 0.486556000  | -0.691019000 |
| N | -0.535850000 | 0.173720000  | -0.231042000 |
| N | -3.967731000 | -0.543468000 | -2.451298000 |
| C | 1.904416000  | -1.301817000 | -1.373040000 |
| C | 2.699865000  | -2.601333000 | -1.539000000 |
| C | 3.503076000  | -2.348055000 | -2.829219000 |
| C | 3.763203000  | -0.825563000 | -2.767654000 |
| C | 3.939163000  | -0.161927000 | -4.069795000 |
| C | 0.009877000  | -2.028996000 | -2.920473000 |
| C | -1.616863000 | -0.942031000 | -2.095541000 |
| C | -0.519546000 | -0.648017000 | -1.292502000 |
| C | -2.842583000 | -0.336101000 | -1.758309000 |
| C | -1.749683000 | 0.690039000  | -0.008346000 |
| O | 3.570340000  | -2.704931000 | -0.426247000 |
| O | 4.737658000  | -3.036922000 | -2.848289000 |
| O | 2.598608000  | -0.293386000 | -2.093378000 |
| H | 1.862840000  | -1.040214000 | -0.316898000 |
| H | 4.382913000  | -3.129266000 | -0.742515000 |
| H | 2.051893000  | -3.478421000 | -1.606016000 |
| H | 4.615976000  | -3.903396000 | -3.254719000 |
| H | 2.902103000  | -2.592394000 | -3.707219000 |
| H | 4.644224000  | -0.674650000 | -2.135760000 |
| H | 3.069684000  | 0.085322000  | -4.663214000 |
| H | 4.927109000  | -0.030020000 | -4.484843000 |
| H | -3.973229000 | -1.153849000 | -3.250005000 |
| H | -4.820631000 | -0.087814000 | -2.174015000 |
| H | 0.623399000  | -2.664908000 | -3.536907000 |
| H | -1.831907000 | 1.362939000  | 0.838346000  |
| H | 2.609633000  | 1.262684000  | -0.293959000 |
| H | 0.567530000  | 0.889521000  | 2.647559000  |

|   |             |              |             |
|---|-------------|--------------|-------------|
| H | 0.724445000 | 2.288712000  | 1.799580000 |
| C | 2.486643000 | 1.168250000  | 1.846812000 |
| N | 0.994294000 | 1.303799000  | 1.817678000 |
| C | 3.084141000 | 1.758212000  | 0.554977000 |
| C | 3.069365000 | 1.860472000  | 3.071993000 |
| O | 2.441120000 | 3.016615000  | 3.321585000 |
| H | 2.820503000 | 2.815937000  | 0.500884000 |
| H | 2.712403000 | 0.108294000  | 1.931954000 |
| O | 4.005447000 | 1.435669000  | 3.692535000 |
| C | 4.580515000 | 1.586302000  | 0.477809000 |
| C | 5.434518000 | 2.684050000  | 0.540048000 |
| C | 5.144724000 | 0.314789000  | 0.348420000 |
| C | 6.814850000 | 2.527979000  | 0.470086000 |
| H | 5.022769000 | 3.680827000  | 0.642399000 |
| C | 6.517795000 | 0.142917000  | 0.278998000 |
| H | 4.509308000 | -0.560899000 | 0.295733000 |
| C | 7.359870000 | 1.253145000  | 0.340193000 |
| H | 7.464544000 | 3.394096000  | 0.515098000 |
| H | 6.949412000 | -0.843838000 | 0.173027000 |
| O | 8.703809000 | 1.027366000  | 0.266139000 |
| H | 9.186245000 | 1.861654000  | 0.323990000 |
| H | 0.556064000 | 0.821247000  | 0.970054000 |
| H | 2.850061000 | 3.455867000  | 4.086030000 |

### 22C-PC-complex

|   |              |              |              |
|---|--------------|--------------|--------------|
| N | 0.443937000  | -1.574518000 | -1.491739000 |
| N | -1.358365000 | -2.322159000 | -2.603425000 |
| N | -3.047092000 | 0.016599000  | -0.272774000 |
| N | -0.668026000 | 0.001197000  | 0.017012000  |
| N | -4.147933000 | -1.284275000 | -1.841253000 |
| C | 1.810933000  | -1.362545000 | -1.066050000 |
| C | 2.786042000  | -2.507477000 | -1.358033000 |
| C | 3.536279000  | -2.005542000 | -2.607512000 |
| C | 3.592560000  | -0.496644000 | -2.382826000 |
| C | 3.710619000  | 0.346656000  | -3.627830000 |
| C | -0.060219000 | -2.389391000 | -2.488216000 |
| C | -1.746816000 | -1.405456000 | -1.645316000 |
| C | -0.642872000 | -0.922342000 | -0.955128000 |
| C | -3.004901000 | -0.898127000 | -1.262794000 |
| C | -1.909942000 | 0.411467000  | 0.292390000  |
| O | 3.668280000  | -2.595186000 | -0.252787000 |
| O | 4.851759000  | -2.521167000 | -2.696180000 |
| O | 2.338629000  | -0.200574000 | -1.718207000 |
| H | 1.771896000  | -1.191701000 | 0.009400000  |
| H | 4.530168000  | -2.865774000 | -0.604674000 |
| H | 2.276851000  | -3.460000000 | -1.517835000 |

|   |              |              |              |
|---|--------------|--------------|--------------|
| H | 4.837196000  | -3.357680000 | -3.176367000 |
| H | 2.959785000  | -2.232020000 | -3.508447000 |
| H | 4.412698000  | -0.282642000 | -1.691794000 |
| H | 2.877488000  | 0.151055000  | -4.304514000 |
| H | 4.645053000  | 0.107234000  | -4.137639000 |
| H | -4.144775000 | -1.965031000 | -2.580874000 |
| H | -5.023127000 | -0.893646000 | -1.535663000 |
| H | 0.581793000  | -3.013152000 | -3.088087000 |
| H | -1.997583000 | 1.164336000  | 1.067559000  |
| H | 3.721034000  | 1.407145000  | -3.374935000 |
| H | 0.673582000  | 1.170696000  | 0.263059000  |
| H | 1.287376000  | 2.701728000  | -0.114249000 |
| C | 2.484391000  | 1.709071000  | 1.308639000  |
| N | 1.549935000  | 1.745346000  | 0.121638000  |
| C | 3.776033000  | 2.380075000  | 0.991008000  |
| C | 1.843573000  | 2.375482000  | 2.521408000  |
| O | 1.074715000  | 3.413294000  | 2.168574000  |
| H | 3.738698000  | 3.458412000  | 0.893736000  |
| H | 2.619803000  | 0.663306000  | 1.566194000  |
| O | 2.056152000  | 2.026508000  | 3.651942000  |
| C | 5.003611000  | 1.727746000  | 0.785312000  |
| C | 6.150577000  | 2.505563000  | 0.456389000  |
| C | 5.189706000  | 0.318955000  | 0.867040000  |
| C | 7.376517000  | 1.927401000  | 0.220624000  |
| H | 6.049421000  | 3.581364000  | 0.386965000  |
| C | 6.415774000  | -0.258448000 | 0.629183000  |
| H | 4.362242000  | -0.336035000 | 1.099727000  |
| C | 7.521302000  | 0.536046000  | 0.303709000  |
| H | 8.231909000  | 2.543317000  | -0.030109000 |
| H | 6.542154000  | -1.331324000 | 0.687464000  |
| O | 8.700369000  | -0.094668000 | 0.078963000  |
| H | 9.390758000  | 0.543889000  | -0.143361000 |
| H | 2.014885000  | 1.309910000  | -0.693166000 |
| H | 0.717732000  | 3.842933000  | 2.964061000  |

### 22D-RC-complex

|   |              |              |              |
|---|--------------|--------------|--------------|
| H | -2.638494000 | -1.994588000 | 0.743298000  |
| H | -3.388031000 | -0.755503000 | 1.495179000  |
| C | -1.666523000 | -0.196254000 | 0.534545000  |
| N | -2.873418000 | -1.011607000 | 0.658747000  |
| C | -2.059709000 | 1.280838000  | 0.333896000  |
| C | -0.708581000 | -0.346983000 | 1.712275000  |
| O | -1.303003000 | -0.068924000 | 2.889499000  |
| H | -2.690932000 | 1.591474000  | 1.167270000  |
| H | -1.108070000 | -0.536730000 | -0.338005000 |
| H | -2.676410000 | 1.316393000  | -0.565810000 |

|   |              |              |              |
|---|--------------|--------------|--------------|
| O | 0.449358000  | -0.681134000 | 1.628910000  |
| C | -0.886612000 | 2.219224000  | 0.206445000  |
| C | -0.346901000 | 2.851855000  | 1.326597000  |
| C | -0.291011000 | 2.464773000  | -1.032701000 |
| C | 0.744881000  | 3.705856000  | 1.220399000  |
| H | -0.779621000 | 2.683736000  | 2.304222000  |
| C | 0.801047000  | 3.312836000  | -1.156338000 |
| H | -0.691326000 | 1.989260000  | -1.920735000 |
| C | 1.322921000  | 3.937830000  | -0.025425000 |
| H | 1.141565000  | 4.193861000  | 2.103346000  |
| H | 1.253476000  | 3.502479000  | -2.121182000 |
| O | 2.395823000  | 4.767685000  | -0.200433000 |
| H | 2.669620000  | 5.138306000  | 0.647815000  |
| H | -0.653186000 | -0.179007000 | 3.602499000  |
| N | -3.828157000 | 5.650367000  | 3.134178000  |
| N | -5.681929000 | 6.915124000  | 3.154248000  |
| N | -3.153482000 | 9.586575000  | 2.707183000  |
| N | -2.155671000 | 7.404071000  | 2.844714000  |
| N | -5.436773000 | 9.966319000  | 2.857156000  |
| C | -2.957625000 | 4.481862000  | 3.210461000  |
| C | -2.531648000 | 4.140933000  | 4.644175000  |
| C | -3.558583000 | 3.066822000  | 5.040162000  |
| C | -3.752842000 | 2.315677000  | 3.704652000  |
| C | -5.019717000 | 1.584601000  | 3.550178000  |
| C | -5.199515000 | 5.700358000  | 3.235089000  |
| C | -4.568583000 | 7.717377000  | 2.996345000  |
| C | -3.406298000 | 6.949570000  | 2.981121000  |
| C | -4.402428000 | 9.107929000  | 2.849694000  |
| C | -2.126894000 | 8.728342000  | 2.711675000  |
| O | -1.228257000 | 3.588102000  | 4.593887000  |
| O | -3.073063000 | 2.170546000  | 6.020880000  |
| O | -3.653953000 | 3.359232000  | 2.706095000  |
| H | -2.082782000 | 4.701002000  | 2.598477000  |
| H | -1.172817000 | 2.928405000  | 5.301582000  |
| H | -2.562327000 | 5.019585000  | 5.293573000  |
| H | -3.266375000 | 2.522090000  | 6.898101000  |
| H | -4.494078000 | 3.535415000  | 5.353785000  |
| H | -2.903593000 | 1.632815000  | 3.598006000  |
| H | -5.908356000 | 2.103244000  | 3.218515000  |
| H | -5.091715000 | 0.556930000  | 3.873497000  |
| H | -6.381150000 | 9.627129000  | 2.909022000  |
| H | -5.275407000 | 10.946257000 | 2.699948000  |
| H | -5.783073000 | 4.802111000  | 3.345540000  |
| H | -1.145375000 | 9.174795000  | 2.591783000  |

## 22D-PC-complex

|   |              |              |              |
|---|--------------|--------------|--------------|
| H | -3.973672000 | 0.064100000  | -1.214228000 |
| H | -4.145171000 | 1.221872000  | -0.084107000 |
| C | -2.263825000 | 0.421340000  | -0.146260000 |
| N | -3.506308000 | 0.853186000  | -0.780839000 |
| C | -1.594475000 | 1.578982000  | 0.534171000  |
| C | -2.413028000 | -0.697114000 | 0.895548000  |
| O | -3.533431000 | -0.574408000 | 1.631382000  |
| H | -3.695765000 | 1.250675000  | 3.389980000  |
| H | -1.613110000 | 0.003628000  | -0.916965000 |
| H | -2.253385000 | 2.353894000  | 0.907868000  |
| O | -1.602654000 | -1.576818000 | 1.072044000  |
| C | -0.214919000 | 1.703985000  | 0.773756000  |
| C | 0.743598000  | 0.720999000  | 0.403667000  |
| C | 0.284349000  | 2.869127000  | 1.423786000  |
| C | 2.089586000  | 0.895935000  | 0.658360000  |
| H | 0.418241000  | -0.195077000 | -0.068582000 |
| C | 1.625572000  | 3.040874000  | 1.678221000  |
| H | -0.407214000 | 3.642044000  | 1.730702000  |
| C | 2.543579000  | 2.055456000  | 1.295004000  |
| H | 2.800200000  | 0.130072000  | 0.369226000  |
| H | 1.985458000  | 3.933163000  | 2.174351000  |
| O | 3.859120000  | 2.279336000  | 1.570854000  |
| H | 4.397653000  | 1.539814000  | 1.261054000  |
| H | -3.542909000 | -1.280284000 | 2.298454000  |
| N | -4.139782000 | 5.864372000  | 2.922917000  |
| N | -6.330078000 | 6.256880000  | 3.214684000  |
| N | -5.185003000 | 9.728750000  | 2.611189000  |
| N | -3.377197000 | 8.146903000  | 2.522857000  |
| N | -7.386679000 | 9.141161000  | 3.044124000  |
| C | -2.864864000 | 5.150650000  | 2.806178000  |
| C | -1.973402000 | 5.345042000  | 4.037946000  |
| C | -2.327298000 | 4.107896000  | 4.882579000  |
| C | -2.585737000 | 3.040133000  | 3.820497000  |
| C | -3.539157000 | 1.939374000  | 4.219383000  |
| C | -5.388059000 | 5.346567000  | 3.178164000  |
| C | -5.669692000 | 7.444547000  | 2.969370000  |
| C | -4.307335000 | 7.220592000  | 2.782380000  |
| C | -6.102645000 | 8.780989000  | 2.873710000  |
| C | -3.906441000 | 9.366492000  | 2.453839000  |
| O | -0.622308000 | 5.295244000  | 3.615069000  |
| O | -1.263699000 | 3.691034000  | 5.723989000  |
| O | -3.123377000 | 3.770653000  | 2.691446000  |
| H | -2.363913000 | 5.522534000  | 1.911247000  |
| H | -0.126072000 | 4.832824000  | 4.307393000  |
| H | -2.188956000 | 6.287426000  | 4.546389000  |
| H | -1.312352000 | 4.168878000  | 6.560601000  |

|   |              |              |             |
|---|--------------|--------------|-------------|
| H | -3.234785000 | 4.299721000  | 5.460688000 |
| H | -1.623102000 | 2.612779000  | 3.524030000 |
| H | -4.502063000 | 2.348917000  | 4.529297000 |
| H | -3.114678000 | 1.380327000  | 5.055142000 |
| H | -8.097506000 | 8.444676000  | 3.182724000 |
| H | -7.659085000 | 10.099996000 | 2.911732000 |
| H | -5.531091000 | 4.288306000  | 3.312240000 |
| H | -3.215201000 | 10.175766000 | 2.243211000 |

### **23A-RC-complex**

|   |              |              |              |
|---|--------------|--------------|--------------|
| C | -0.551080000 | -2.232007000 | -0.244226000 |
| N | -0.409233000 | -2.041675000 | -1.677993000 |
| C | -2.005102000 | -2.600513000 | 0.113158000  |
| C | -2.955747000 | -1.446599000 | -0.169396000 |
| C | -4.402111000 | -1.786915000 | 0.045020000  |
| O | -5.194915000 | -0.708043000 | -0.130661000 |
| H | -0.311635000 | -1.286380000 | 0.250300000  |
| H | -2.079612000 | -2.877584000 | 1.165180000  |
| H | -2.297557000 | -3.480092000 | -0.465746000 |
| O | -4.846531000 | -2.874262000 | 0.333003000  |
| C | 0.403354000  | -3.287895000 | 0.332603000  |
| O | 1.044165000  | -4.016449000 | -0.398784000 |
| H | -2.843837000 | -1.099872000 | -1.199308000 |
| H | -2.713668000 | -0.583147000 | 0.453269000  |
| H | -6.116620000 | -0.980742000 | 0.008089000  |
| C | 0.764995000  | -1.259911000 | -2.062676000 |
| H | 0.636684000  | -0.232737000 | -1.720973000 |
| H | 1.709483000  | -1.644123000 | -1.655668000 |
| H | 0.845247000  | -1.245042000 | -3.150161000 |
| H | -0.360021000 | -2.954934000 | -2.117435000 |
| C | 0.488771000  | -3.409609000 | 1.833656000  |
| H | -0.317347000 | -4.060822000 | 2.181692000  |
| H | 1.436937000  | -3.865755000 | 2.111936000  |
| H | 0.374488000  | -2.441958000 | 2.320897000  |
| N | 1.371879000  | 1.636872000  | 0.218692000  |
| N | 3.090742000  | 1.758871000  | -1.223222000 |
| N | 4.214038000  | -1.154475000 | 0.770376000  |
| N | 2.105529000  | -0.288015000 | 1.531371000  |
| N | 5.399446000  | -0.256698000 | -1.008972000 |
| C | 0.054684000  | 1.832654000  | 0.792649000  |
| C | -0.371040000 | 3.298901000  | 0.938748000  |
| C | -1.308619000 | 3.505549000  | -0.266304000 |
| C | -1.961137000 | 2.112896000  | -0.416541000 |
| C | -2.448036000 | 1.785982000  | -1.767257000 |
| C | 1.941182000  | 2.268473000  | -0.867870000 |
| C | 3.297181000  | 0.719837000  | -0.335228000 |

|   |              |              |              |
|---|--------------|--------------|--------------|
| C | 2.238814000  | 0.622056000  | 0.562540000  |
| C | 4.325344000  | -0.232961000 | -0.203285000 |
| C | 3.137329000  | -1.129008000 | 1.562877000  |
| O | -1.093192000 | 3.417817000  | 2.151895000  |
| O | -2.306590000 | 4.478924000  | -0.026744000 |
| O | -0.914562000 | 1.198255000  | -0.037117000 |
| H | 0.075115000  | 1.349993000  | 1.768904000  |
| H | -1.770304000 | 4.096476000  | 2.008212000  |
| H | 0.485827000  | 3.977442000  | 0.928445000  |
| H | -1.983295000 | 5.344692000  | -0.303062000 |
| H | -0.732110000 | 3.744180000  | -1.162205000 |
| H | -2.778291000 | 2.061503000  | 0.313588000  |
| H | -1.750005000 | 1.425991000  | -2.510033000 |
| H | -3.470778000 | 1.991615000  | -2.044603000 |
| H | 5.494560000  | 0.408272000  | -1.756136000 |
| H | 6.098183000  | -0.970478000 | -0.893628000 |
| H | 1.460304000  | 3.101933000  | -1.353091000 |
| H | 3.101750000  | -1.898120000 | 2.326230000  |

### 23A-PC-complex

|   |              |              |              |
|---|--------------|--------------|--------------|
| C | 0.419475000  | 2.270969000  | 0.298876000  |
| N | -0.484665000 | 2.499369000  | 1.406117000  |
| C | -0.179828000 | 2.840917000  | -1.024514000 |
| C | -1.348716000 | 2.054724000  | -1.465466000 |
| C | -2.701215000 | 2.512853000  | -1.290983000 |
| O | -3.618119000 | 1.581864000  | -1.669539000 |
| H | 0.548754000  | 1.194242000  | 0.176129000  |
| H | 0.588566000  | 2.811310000  | -1.802442000 |
| H | -0.453949000 | 3.882904000  | -0.854073000 |
| O | -3.034372000 | 3.607547000  | -0.861018000 |
| C | 1.805578000  | 2.910383000  | 0.486586000  |
| O | 1.932522000  | 3.912140000  | 1.160436000  |
| H | -3.428288000 | 0.922413000  | 1.365747000  |
| H | -1.201528000 | 1.064893000  | -1.871311000 |
| H | -4.500476000 | 1.958274000  | -1.526467000 |
| C | -0.164759000 | 1.704180000  | 2.589613000  |
| H | -0.308905000 | 0.649232000  | 2.354913000  |
| H | 0.862677000  | 1.840716000  | 2.956299000  |
| H | -0.850723000 | 1.967650000  | 3.395081000  |
| H | -0.463538000 | 3.486522000  | 1.640458000  |
| C | 2.969519000  | 2.241395000  | -0.188264000 |
| H | 2.694695000  | 1.827563000  | -1.158415000 |
| H | 3.808259000  | 2.927191000  | -0.287761000 |
| H | 3.272871000  | 1.399189000  | 0.440337000  |
| N | 0.546756000  | -1.665896000 | 0.102303000  |
| N | 2.221200000  | -1.852885000 | 1.586227000  |

|   |              |              |              |
|---|--------------|--------------|--------------|
| N | 4.201463000  | -0.953123000 | -1.413993000 |
| N | 1.845214000  | -1.055280000 | -1.875685000 |
| N | 5.114594000  | -1.352369000 | 0.679746000  |
| C | -0.797742000 | -1.606727000 | -0.428879000 |
| C | -1.638112000 | -2.889144000 | -0.245260000 |
| C | -2.706119000 | -2.452935000 | 0.780656000  |
| C | -2.839056000 | -0.957183000 | 0.503778000  |
| C | -3.391319000 | -0.131288000 | 1.639091000  |
| C | 0.929394000  | -1.929561000 | 1.399950000  |
| C | 2.729655000  | -1.515698000 | 0.345528000  |
| C | 1.705031000  | -1.388255000 | -0.589199000 |
| C | 4.037605000  | -1.279819000 | -0.119577000 |
| C | 3.122212000  | -0.858920000 | -2.198192000 |
| O | -2.240165000 | -3.209035000 | -1.487942000 |
| O | -3.951021000 | -3.104737000 | 0.587537000  |
| O | -1.487169000 | -0.555198000 | 0.233514000  |
| H | -0.693851000 | -1.400818000 | -1.495542000 |
| H | -3.129154000 | -3.540221000 | -1.286124000 |
| H | -1.025709000 | -3.721972000 | 0.109013000  |
| H | -3.973402000 | -3.913793000 | 1.111947000  |
| H | -2.334736000 | -2.607212000 | 1.796917000  |
| H | -3.447952000 | -0.819773000 | -0.397174000 |
| H | -2.769232000 | -0.240185000 | 2.528614000  |
| H | -4.403676000 | -0.465492000 | 1.871023000  |
| H | 5.020684000  | -1.626781000 | 1.641768000  |
| H | 6.032952000  | -1.202894000 | 0.298472000  |
| H | 0.203984000  | -2.163462000 | 2.162586000  |
| H | 3.316727000  | -0.584210000 | -3.229365000 |

### 23B-RC-complex

|   |              |              |              |
|---|--------------|--------------|--------------|
| C | -2.071517000 | 1.342859000  | 0.603173000  |
| N | -3.445174000 | 0.950766000  | 0.311620000  |
| C | -1.559756000 | 2.299517000  | -0.486459000 |
| C | -0.125695000 | 2.804257000  | -0.275433000 |
| C | 0.439102000  | 3.394659000  | -1.578706000 |
| O | 0.125716000  | 4.578912000  | -1.857098000 |
| H | -1.458448000 | 0.439885000  | 0.585536000  |
| H | -2.244428000 | 3.149867000  | -0.551805000 |
| H | -1.624032000 | 1.751726000  | -1.427642000 |
| O | 1.154274000  | 2.628861000  | -2.282671000 |
| C | -1.916808000 | 1.995851000  | 1.986345000  |
| O | -2.718418000 | 2.831012000  | 2.359495000  |
| H | 0.512914000  | 1.983854000  | 0.045398000  |
| H | -0.111051000 | 3.568742000  | 0.505551000  |
| C | -3.956902000 | -0.111127000 | 1.176614000  |
| H | -3.363091000 | -1.014650000 | 1.029042000  |



|   |              |              |              |
|---|--------------|--------------|--------------|
| H | -3.942025000 | 0.133095000  | 2.248564000  |
| H | -4.985956000 | -0.339094000 | 0.897083000  |
| H | -4.036589000 | 1.771250000  | 0.397149000  |
| C | -0.769860000 | 1.540839000  | 2.843264000  |
| H | -0.649946000 | 2.186415000  | 3.711195000  |
| H | -0.983216000 | 0.519195000  | 3.174953000  |
| H | 0.155345000  | 1.488184000  | 2.266892000  |
| N | 0.591443000  | -1.170940000 | -0.174006000 |
| N | -0.661898000 | -0.790914000 | -1.994445000 |
| N | -2.729364000 | -3.421995000 | -0.407158000 |
| N | -0.754672000 | -2.923357000 | 0.868927000  |
| N | -3.260823000 | -2.376010000 | -2.409810000 |
| C | 1.674993000  | -1.077214000 | 0.798462000  |
| C | 2.931058000  | -1.850550000 | 0.380245000  |
| C | 3.785878000  | -0.750740000 | -0.269900000 |
| C | 3.444415000  | 0.478678000  | 0.601702000  |
| C | 3.624697000  | 1.784367000  | -0.054379000 |
| C | 0.420553000  | -0.450902000 | -1.338824000 |
| C | -1.238627000 | -1.785676000 | -1.230401000 |
| C | -0.474345000 | -2.037264000 | -0.093140000 |
| C | -2.427835000 | -2.525664000 | -1.363214000 |
| C | -1.894644000 | -3.567650000 | 0.628699000  |
| O | 3.556355000  | -2.340039000 | 1.553401000  |
| O | 5.174705000  | -1.013682000 | -0.200755000 |
| O | 2.051267000  | 0.277973000  | 0.945620000  |
| H | 1.283225000  | -1.472917000 | 1.735690000  |
| H | 4.510459000  | -2.339919000 | 1.384064000  |
| H | 2.690725000  | -2.665033000 | -0.308305000 |
| H | 5.443340000  | -1.514803000 | -0.979826000 |
| H | 3.463020000  | -0.581813000 | -1.299564000 |
| H | 4.050427000  | 0.406654000  | 1.511721000  |
| H | 2.883262000  | 2.134436000  | -0.762605000 |
| H | 4.552258000  | 2.322852000  | 0.074447000  |
| H | -3.113515000 | -1.627549000 | -3.064531000 |
| H | -4.153013000 | -2.840521000 | -2.400511000 |
| H | 1.076518000  | 0.361184000  | -1.618638000 |
| H | -2.192203000 | -4.303618000 | 1.368025000  |

### 23B-PC-complex

|   |              |             |              |
|---|--------------|-------------|--------------|
| C | 0.657742000  | 2.481488000 | -0.368259000 |
| N | -0.273539000 | 2.990708000 | -1.362364000 |
| C | 2.057761000  | 3.138554000 | -0.584985000 |
| C | 3.145148000  | 2.606718000 | 0.271915000  |
| C | 4.146803000  | 1.621998000 | -0.201049000 |
| O | 4.842896000  | 1.055146000 | 0.693467000  |
| H | 0.762053000  | 1.402816000 | -0.506170000 |

|   |              |              |              |
|---|--------------|--------------|--------------|
| H | 1.928840000  | 4.216259000  | -0.425572000 |
| H | 2.313830000  | 2.972224000  | -1.630841000 |
| O | 4.229693000  | 1.413365000  | -1.446163000 |
| C | 0.217302000  | 2.757007000  | 1.075185000  |
| O | -0.400042000 | 3.770966000  | 1.342982000  |
| H | 3.359007000  | -0.757860000 | -1.663839000 |
| H | 3.188971000  | 2.891548000  | 1.316960000  |
| C | -1.546018000 | 2.270943000  | -1.391706000 |
| H | -1.370870000 | 1.240246000  | -1.703582000 |
| H | -2.071701000 | 2.247860000  | -0.427193000 |
| H | -2.207171000 | 2.733478000  | -2.125289000 |
| H | -0.448529000 | 3.970720000  | -1.163452000 |
| C | 0.560266000  | 1.741939000  | 2.128994000  |
| H | 0.715495000  | 2.227531000  | 3.091569000  |
| H | -0.305025000 | 1.075863000  | 2.213952000  |
| H | 1.425302000  | 1.139474000  | 1.855253000  |
| N | -1.195440000 | -1.367497000 | -0.118299000 |
| N | -2.734415000 | -1.327369000 | -1.752801000 |
| N | -4.586072000 | 0.571212000  | 0.833608000  |
| N | -2.419946000 | -0.133300000 | 1.598042000  |
| N | -5.414897000 | 0.093793000  | -1.279253000 |
| C | 0.061229000  | -1.611980000 | 0.565513000  |
| C | 0.393104000  | -3.098981000 | 0.791100000  |
| C | 1.487600000  | -3.364532000 | -0.259194000 |
| C | 2.185805000  | -2.009907000 | -0.363096000 |
| C | 2.909884000  | -1.751853000 | -1.662038000 |
| C | -1.534062000 | -1.716097000 | -1.407248000 |
| C | -3.222594000 | -0.681321000 | -0.633045000 |
| C | -2.281025000 | -0.692929000 | 0.392492000  |
| C | -4.427858000 | -0.002351000 | -0.372795000 |
| C | -3.596704000 | 0.475221000  | 1.728551000  |
| O | 0.917842000  | -3.238531000 | 2.101084000  |
| O | 2.412362000  | -4.360290000 | 0.148560000  |
| O | 1.113412000  | -1.059025000 | -0.212472000 |
| H | -0.017530000 | -1.113475000 | 1.530868000  |
| H | 1.613054000  | -3.912536000 | 2.050266000  |
| H | -0.489141000 | -3.730160000 | 0.658405000  |
| H | 2.091362000  | -5.226680000 | -0.128351000 |
| H | 1.032930000  | -3.623846000 | -1.218733000 |
| H | 2.874840000  | -1.912291000 | 0.483945000  |
| H | 2.219197000  | -1.837346000 | -2.503730000 |
| H | 3.702053000  | -2.493114000 | -1.784636000 |
| H | -5.299702000 | -0.286185000 | -2.202246000 |
| H | -6.238712000 | 0.630335000  | -1.068250000 |
| H | -0.844483000 | -2.244282000 | -2.045073000 |
| H | -3.779520000 | 0.960037000  | 2.681553000  |

**24-RC-complex**

|   |              |              |              |
|---|--------------|--------------|--------------|
| H | -0.112683000 | 0.604788000  | -1.603668000 |
| C | 1.390494000  | -1.360484000 | -1.414153000 |
| H | 1.841967000  | -1.654438000 | -0.466238000 |
| H | 1.666345000  | -2.105994000 | -2.159978000 |
| H | 1.790783000  | -0.392812000 | -1.712383000 |
| C | -0.117206000 | -1.380104000 | -1.248704000 |
| H | -2.277763000 | 0.921432000  | -2.161542000 |
| H | -2.213601000 | 1.381907000  | 1.846171000  |
| O | -0.697013000 | -2.426790000 | -0.965701000 |
| C | -2.373772000 | 1.116858000  | -0.105141000 |
| C | -2.125815000 | 0.220265000  | -1.337657000 |
| N | -0.721132000 | -0.185546000 | -1.434569000 |
| C | -3.181138000 | -0.891840000 | -1.523454000 |
| O | -2.880959000 | 2.228373000  | -0.276950000 |
| N | -2.044287000 | 0.692401000  | 1.127960000  |
| H | -3.007836000 | -1.673907000 | -0.787471000 |
| C | -3.052934000 | -1.507675000 | -2.918819000 |
| H | -3.238098000 | -0.753853000 | -3.689368000 |
| H | -2.064704000 | -1.933931000 | -3.081794000 |
| H | -3.788076000 | -2.304558000 | -3.046773000 |
| C | -4.591271000 | -0.330256000 | -1.316178000 |
| H | -4.794279000 | 0.492439000  | -2.006147000 |
| H | -5.328425000 | -1.113659000 | -1.499323000 |
| H | -4.742316000 | 0.038368000  | -0.300714000 |
| C | -1.459049000 | -0.569736000 | 1.558522000  |
| H | -0.371210000 | -0.501435000 | 1.610864000  |
| H | -1.847225000 | -0.806525000 | 2.548274000  |
| H | -1.728462000 | -1.376068000 | 0.885301000  |
| N | 2.308511000  | 2.096511000  | 0.044001000  |
| N | 4.410658000  | 1.620751000  | -0.584389000 |
| N | 3.947815000  | -1.034877000 | 1.959161000  |
| N | 2.003210000  | 0.357096000  | 1.730866000  |
| N | 5.896383000  | -0.720938000 | 0.741105000  |
| C | 0.991393000  | 2.689755000  | 0.029605000  |
| C | 0.945609000  | 4.205959000  | 0.295923000  |
| C | 0.611551000  | 4.796731000  | -1.089280000 |
| C | -0.237084000 | 3.676820000  | -1.727915000 |
| C | -0.293133000 | 3.675026000  | -3.197372000 |
| C | 3.378198000  | 2.399480000  | -0.772159000 |
| C | 4.007495000  | 0.744843000  | 0.406908000  |
| C | 2.704380000  | 1.021576000  | 0.809441000  |
| C | 4.639609000  | -0.347101000 | 1.032381000  |
| C | 2.699563000  | -0.652211000 | 2.249087000  |
| O | -0.102244000 | 4.459941000  | 1.213538000  |

|   |              |              |              |
|---|--------------|--------------|--------------|
| O | -0.142833000 | 5.990104000  | -1.007918000 |
| O | 0.427462000  | 2.480346000  | -1.266024000 |
| H | 0.408772000  | 2.169043000  | 0.790051000  |
| H | -0.492925000 | 5.310985000  | 0.962052000  |
| H | 1.899381000  | 4.570651000  | 0.686014000  |
| H | 0.455073000  | 6.746874000  | -0.995482000 |
| H | 1.525690000  | 4.941456000  | -1.669113000 |
| H | -1.241940000 | 3.724003000  | -1.294616000 |
| H | 0.534282000  | 3.268737000  | -3.762777000 |
| H | -1.096314000 | 4.180946000  | -3.711186000 |
| H | 6.412186000  | -0.255988000 | 0.014826000  |
| H | 6.288264000  | -1.539772000 | 1.173724000  |
| H | 3.325478000  | 3.201505000  | -1.490614000 |
| H | 2.190646000  | -1.245693000 | 3.001115000  |

#### **24-PC-complex**

|   |              |              |              |
|---|--------------|--------------|--------------|
| H | -0.604732000 | 1.029496000  | 0.193159000  |
| C | -0.490383000 | 1.061461000  | 2.677446000  |
| H | -0.732016000 | 2.103350000  | 2.464786000  |
| H | -0.645467000 | 0.855337000  | 3.732877000  |
| H | 0.562155000  | 0.910124000  | 2.425610000  |
| C | -1.352142000 | 0.129381000  | 1.858619000  |
| H | -2.377350000 | 3.193748000  | -0.216619000 |
| H | -4.965365000 | -1.806873000 | -0.554457000 |
| O | -2.050275000 | -0.745003000 | 2.354395000  |
| C | -3.406267000 | -0.607295000 | -0.231333000 |
| C | -1.959234000 | -0.408117000 | -0.446894000 |
| N | -1.262173000 | 0.319597000  | 0.501846000  |
| C | -1.292138000 | -0.648275000 | -1.775185000 |
| O | -4.104927000 | 0.296484000  | 0.248803000  |
| N | -3.960874000 | -1.776303000 | -0.640473000 |
| H | -1.980017000 | -1.239362000 | -2.380627000 |
| C | 0.017345000  | -1.437357000 | -1.618018000 |
| H | 0.719798000  | -0.900349000 | -0.981383000 |
| H | -0.156755000 | -2.416172000 | -1.170031000 |
| H | 0.490676000  | -1.584804000 | -2.590155000 |
| C | -1.047884000 | 0.670229000  | -2.537675000 |
| H | -0.352197000 | 1.320882000  | -2.006933000 |
| H | -0.619825000 | 0.455786000  | -3.518358000 |
| H | -1.980185000 | 1.218024000  | -2.680656000 |
| C | -3.275334000 | -3.029322000 | -0.909687000 |
| H | -3.849337000 | -3.850188000 | -0.480554000 |
| H | -3.153385000 | -3.215489000 | -1.979353000 |
| H | -2.292998000 | -3.024239000 | -0.441411000 |
| N | 2.355790000  | 2.139089000  | -0.762512000 |
| N | 3.053228000  | 1.244262000  | -2.700328000 |

|   |              |              |              |
|---|--------------|--------------|--------------|
| N | 3.697139000  | -1.637603000 | -0.461679000 |
| N | 2.776276000  | 0.243186000  | 0.716665000  |
| N | 4.136514000  | -1.632304000 | -2.738650000 |
| C | 1.671633000  | 3.008018000  | 0.163899000  |
| C | 1.925552000  | 4.514218000  | -0.021819000 |
| C | 0.587942000  | 5.020801000  | -0.602462000 |
| C | -0.427004000 | 4.068853000  | 0.025543000  |
| C | -1.741297000 | 3.933642000  | -0.703143000 |
| C | 2.526437000  | 2.291369000  | -2.123907000 |
| C | 3.228154000  | 0.333906000  | -1.674042000 |
| C | 2.793130000  | 0.866071000  | -0.464925000 |
| C | 3.699319000  | -0.992591000 | -1.642233000 |
| C | 3.247031000  | -0.999402000 | 0.623862000  |
| O | 2.156501000  | 5.077871000  | 1.257766000  |
| O | 0.301796000  | 6.357795000  | -0.232343000 |
| O | 0.263464000  | 2.805638000  | 0.009824000  |
| H | 1.983526000  | 2.705359000  | 1.163182000  |
| H | 1.772062000  | 5.967953000  | 1.241619000  |
| H | 2.774024000  | 4.706251000  | -0.682641000 |
| H | 0.661488000  | 6.957782000  | -0.896322000 |
| H | 0.581009000  | 4.900668000  | -1.688785000 |
| H | -0.593764000 | 4.378485000  | 1.063951000  |
| H | -1.576826000 | 3.628693000  | -1.736989000 |
| H | -2.259598000 | 4.893247000  | -0.694878000 |
| H | 4.115846000  | -1.181655000 | -3.636481000 |
| H | 4.426909000  | -2.593040000 | -2.677346000 |
| H | 2.241750000  | 3.199881000  | -2.629946000 |
| H | 3.263811000  | -1.572973000 | 1.544294000  |

### **25-RC-complex**

|   |              |              |              |
|---|--------------|--------------|--------------|
| H | 3.226993000  | 3.087591000  | -3.294997000 |
| H | -1.731732000 | 1.434531000  | -0.587064000 |
| H | -1.502664000 | 2.516624000  | -1.970439000 |
| H | -1.424782000 | -1.971840000 | -1.143638000 |
| H | 1.114909000  | -3.053369000 | -1.349125000 |
| H | 3.901330000  | -0.462056000 | -2.463830000 |
| H | 4.469797000  | -0.134449000 | -0.944809000 |
| H | -0.103198000 | 0.724941000  | -3.063433000 |
| H | -0.203803000 | -0.470221000 | -0.256779000 |
| H | 1.446624000  | -1.267050000 | -2.682155000 |
| H | 2.320264000  | -0.065268000 | -0.016773000 |
| H | 2.753337000  | 2.023190000  | -1.206603000 |
| C | 2.486653000  | 2.424657000  | -3.751270000 |
| O | 2.441250000  | 1.171714000  | -3.058510000 |
| O | -2.612264000 | 0.864996000  | -2.393256000 |
| C | -1.549268000 | 1.469763000  | -1.668407000 |

|   |              |              |              |
|---|--------------|--------------|--------------|
| O | -1.046480000 | -1.448010000 | -1.877567000 |
| O | 1.588252000  | -2.336539000 | -0.909570000 |
| N | 3.733517000  | -0.614009000 | -1.464879000 |
| O | 0.807281000  | 1.681811000  | -1.451494000 |
| C | -0.208721000 | 0.812443000  | -1.977191000 |
| C | -0.065984000 | -0.571213000 | -1.338656000 |
| C | 1.332256000  | -1.122322000 | -1.602582000 |
| C | 2.127654000  | 1.272119000  | -1.698561000 |
| H | -2.501876000 | -0.094138000 | -2.304123000 |
| H | 2.775354000  | 2.201220000  | -4.774923000 |
| H | 1.507834000  | 2.906618000  | -3.740909000 |
| C | 2.362098000  | -0.121023000 | -1.102692000 |
| H | 3.798707000  | -1.615985000 | -1.263371000 |
| N | -1.214235000 | -4.854835000 | 0.734695000  |
| N | 0.894402000  | -5.353133000 | 1.315650000  |
| N | -0.370634000 | -8.779904000 | 0.691542000  |
| N | -2.053911000 | -7.106113000 | 0.314257000  |
| N | 1.791673000  | -8.295849000 | 1.375936000  |
| C | -2.412330000 | -4.086052000 | 0.407462000  |
| C | -3.502845000 | -4.198957000 | 1.475047000  |
| C | -3.226759000 | -2.966980000 | 2.354300000  |
| C | -2.780827000 | -1.916462000 | 1.316938000  |
| C | -1.912874000 | -0.846931000 | 1.832608000  |
| C | 0.022615000  | -4.393786000 | 1.128606000  |
| C | 0.200795000  | -6.512758000 | 1.029985000  |
| C | -1.110614000 | -6.223743000 | 0.661420000  |
| C | 0.561884000  | -7.874089000 | 1.037655000  |
| C | -1.594153000 | -8.355167000 | 0.356486000  |
| O | -4.755375000 | -4.081246000 | 0.827896000  |
| O | -4.377585000 | -2.501768000 | 3.029316000  |
| O | -2.059614000 | -2.716205000 | 0.328810000  |
| H | -2.783889000 | -4.435308000 | -0.556266000 |
| H | -5.363282000 | -3.668614000 | 1.459459000  |
| H | -3.426390000 | -5.137916000 | 2.028304000  |
| H | -4.445045000 | -2.942411000 | 3.884593000  |
| H | -2.409919000 | -3.177162000 | 3.048200000  |
| H | -3.676027000 | -1.507842000 | 0.841991000  |
| H | -0.908589000 | -1.082742000 | 2.157472000  |
| H | -2.300365000 | 0.147765000  | 1.990211000  |
| H | 2.506591000  | -7.637975000 | 1.631877000  |
| H | 2.008252000  | -9.277581000 | 1.360814000  |
| H | 0.218276000  | -3.340619000 | 1.229975000  |
| H | -2.300146000 | -9.133064000 | 0.085624000  |

**25-PC-complex**

|   |             |             |              |
|---|-------------|-------------|--------------|
| H | 3.471147000 | 2.598475000 | -3.666304000 |
|---|-------------|-------------|--------------|

|   |              |              |              |
|---|--------------|--------------|--------------|
| H | -1.594527000 | 1.886968000  | -0.653090000 |
| H | -1.355602000 | 2.875978000  | -2.104085000 |
| H | -1.427743000 | -1.771304000 | -0.959660000 |
| H | 0.904370000  | -2.973193000 | -1.049998000 |
| H | 3.745786000  | -0.797589000 | -2.207188000 |
| H | 4.241625000  | -0.292154000 | -0.710115000 |
| H | -0.239689000 | 0.942163000  | -3.216670000 |
| H | -1.442779000 | -0.226361000 | 1.193852000  |
| H | 1.279092000  | -1.413668000 | -2.494781000 |
| H | 2.051466000  | 0.124815000  | 0.018011000  |
| H | 2.839199000  | 1.939608000  | -1.450535000 |
| C | 2.648822000  | 1.978517000  | -4.034351000 |
| O | 2.432615000  | 0.862552000  | -3.162727000 |
| O | -2.679892000 | 1.361431000  | -2.359605000 |
| C | -1.500464000 | 1.857404000  | -1.744477000 |
| O | -1.383309000 | -1.028231000 | -1.604694000 |
| O | 1.095228000  | -2.158121000 | -0.571188000 |
| N | 3.493687000  | -0.770620000 | -1.214652000 |
| O | 0.869203000  | 1.819111000  | -1.692926000 |
| C | -0.262473000 | 1.038290000  | -2.120066000 |
| C | -0.235069000 | -0.314560000 | -1.474541000 |
| C | 1.066126000  | -1.056018000 | -1.475778000 |
| C | 2.122722000  | 1.209595000  | -1.842584000 |
| H | -2.779015000 | 0.438657000  | -2.086307000 |
| H | 2.906867000  | 1.565743000  | -5.005877000 |
| H | 1.744490000  | 2.583144000  | -4.118803000 |
| C | 2.165556000  | -0.094137000 | -1.040833000 |
| H | 3.435575000  | -1.730034000 | -0.860014000 |
| N | -1.105649000 | -4.902803000 | 0.787220000  |
| N | 0.930314000  | -5.440919000 | 1.561576000  |
| N | -0.207940000 | -8.806565000 | 0.509253000  |
| N | -1.863423000 | -7.114637000 | 0.090414000  |
| N | 1.858852000  | -8.371742000 | 1.467215000  |
| C | -2.281954000 | -4.116811000 | 0.424523000  |
| C | -3.422926000 | -4.251445000 | 1.438057000  |
| C | -3.183735000 | -3.038835000 | 2.356468000  |
| C | -2.676009000 | -1.981291000 | 1.379692000  |
| C | -1.798700000 | -0.904377000 | 1.969724000  |
| C | 0.071017000  | -4.473261000 | 1.360696000  |
| C | 0.289435000  | -6.574237000 | 1.100280000  |
| C | -0.976577000 | -6.259993000 | 0.612274000  |
| C | 0.667438000  | -7.929038000 | 1.032112000  |
| C | -1.393267000 | -8.360512000 | 0.077999000  |
| O | -4.645602000 | -4.113705000 | 0.738058000  |
| O | -4.368296000 | -2.576782000 | 2.980619000  |
| O | -1.917727000 | -2.748269000 | 0.404050000  |

|   |              |              |              |
|---|--------------|--------------|--------------|
| H | -2.607407000 | -4.440886000 | -0.563831000 |
| H | -5.268128000 | -3.678995000 | 1.340316000  |
| H | -3.375598000 | -5.205403000 | 1.968093000  |
| H | -4.499720000 | -3.055658000 | 3.807396000  |
| H | -2.412929000 | -3.275930000 | 3.094049000  |
| H | -3.536436000 | -1.540038000 | 0.868800000  |
| H | -0.937162000 | -1.337646000 | 2.479439000  |
| H | -2.378399000 | -0.327758000 | 2.691842000  |
| H | 2.529430000  | -7.735459000 | 1.860656000  |
| H | 2.087275000  | -9.348537000 | 1.400232000  |
| H | 0.237609000  | -3.431258000 | 1.569064000  |
| H | -2.054168000 | -9.116140000 | -0.333539000 |

### 26-RC-complex

|   |              |              |              |
|---|--------------|--------------|--------------|
| N | -1.219711000 | 1.370131000  | -0.098946000 |
| N | 0.450519000  | 0.463917000  | 1.096437000  |
| N | -0.865059000 | 2.833119000  | 3.627552000  |
| N | -2.096078000 | 2.923604000  | 1.566679000  |
| N | 0.952713000  | 1.433729000  | 3.973862000  |
| C | -2.148416000 | 1.607411000  | -1.172829000 |
| C | -1.524356000 | 1.954082000  | -2.548223000 |
| C | -2.138243000 | 0.886462000  | -3.494042000 |
| C | -3.373812000 | 0.424299000  | -2.720444000 |
| C | -0.179740000 | 0.466644000  | -0.049024000 |
| C | -0.208352000 | 1.414164000  | 1.856139000  |
| C | -1.252994000 | 1.983330000  | 1.134279000  |
| C | -0.026844000 | 1.885288000  | 3.170757000  |
| C | -1.829781000 | 3.287270000  | 2.818171000  |
| O | -1.912423000 | 3.262980000  | -2.935627000 |
| O | -2.517203000 | 1.427604000  | -4.748937000 |
| O | -2.930446000 | 0.431476000  | -1.360473000 |
| H | -2.779455000 | 2.435272000  | -0.856246000 |
| H | -2.211343000 | 3.198965000  | -3.858015000 |
| H | -0.435128000 | 1.892386000  | -2.516987000 |
| H | -1.814890000 | 1.274781000  | -5.391792000 |
| H | -1.441078000 | 0.056034000  | -3.616482000 |
| H | -4.162572000 | 1.172655000  | -2.856416000 |
| H | 1.544593000  | 0.677143000  | 3.678904000  |
| H | 1.000951000  | 1.748754000  | 4.927611000  |
| H | 0.056017000  | -0.165239000 | -0.890423000 |
| H | -2.475921000 | 4.050258000  | 3.239278000  |
| C | -3.877298000 | -0.949071000 | -3.093155000 |
| H | -4.125806000 | -0.946163000 | -4.155838000 |
| H | -3.101517000 | -1.696031000 | -2.913962000 |
| S | -5.379012000 | -1.379691000 | -2.145220000 |
| C | -5.908056000 | -2.844393000 | -3.077497000 |



|   |               |              |              |
|---|---------------|--------------|--------------|
| H | -6.118555000  | -2.587370000 | -4.115457000 |
| H | -5.148736000  | -3.624923000 | -3.036007000 |
| H | -6.819851000  | -3.208992000 | -2.606241000 |
| N | -6.637765000  | 2.561734000  | 0.336474000  |
| N | -5.223332000  | 2.973363000  | -1.353400000 |
| N | -4.259176000  | 5.747318000  | 0.903133000  |
| N | -6.026788000  | 4.401172000  | 1.819827000  |
| N | -3.232810000  | 5.315986000  | -1.136097000 |
| C | -7.695017000  | 1.934526000  | 1.127332000  |
| C | -9.063266000  | 2.588092000  | 0.905629000  |
| C | -9.667577000  | 1.696336000  | -0.191458000 |
| C | -9.125550000  | 0.302781000  | 0.200853000  |
| C | -9.033243000  | -0.674947000 | -0.895279000 |
| C | -6.169722000  | 2.188714000  | -0.902188000 |
| C | -5.051883000  | 3.920310000  | -0.361932000 |
| C | -5.926560000  | 3.682748000  | 0.696372000  |
| C | -4.159799000  | 4.998362000  | -0.210134000 |
| C | -5.163177000  | 5.415468000  | 1.830332000  |
| O | -9.804074000  | 2.474448000  | 2.106932000  |
| O | -11.081873000 | 1.677327000  | -0.176844000 |
| O | -7.811117000  | 0.581053000  | 0.739503000  |
| H | -7.402259000  | 2.012382000  | 2.174960000  |
| H | -10.736056000 | 2.388007000  | 1.856573000  |
| H | -8.965237000  | 3.632479000  | 0.597838000  |
| H | -11.416184000 | 2.389604000  | -0.734735000 |
| H | -9.281545000  | 1.989525000  | -1.170344000 |
| H | -9.769020000  | -0.074454000 | 1.004123000  |
| H | -8.181000000  | -0.660672000 | -1.560500000 |
| H | -9.869177000  | -1.323200000 | -1.111831000 |
| H | -2.960335000  | 4.628023000  | -1.828320000 |
| H | -2.537104000  | 5.995256000  | -0.872681000 |
| H | -6.543744000  | 1.311729000  | -1.403322000 |
| H | -5.189479000  | 6.054334000  | 2.706974000  |

### 26-PC-complex

|   |              |              |              |
|---|--------------|--------------|--------------|
| N | -0.947587000 | 1.380028000  | 0.254255000  |
| N | 0.260041000  | -0.314950000 | 1.092482000  |
| N | 2.349999000  | 2.522526000  | 2.238381000  |
| N | 0.421177000  | 3.253751000  | 1.004568000  |
| N | 2.847622000  | 0.293510000  | 2.643265000  |
| C | -2.003496000 | 2.115710000  | -0.440372000 |
| C | -1.558775000 | 2.607995000  | -1.825063000 |
| C | -2.104109000 | 1.504017000  | -2.748336000 |
| C | -3.400603000 | 1.114387000  | -2.037983000 |
| C | -0.808826000 | 0.020277000  | 0.413166000  |
| C | 0.864239000  | 0.888180000  | 1.400405000  |

|   |               |              |              |
|---|---------------|--------------|--------------|
| C | 0.126600000   | 1.953802000  | 0.890159000  |
| C | 2.035349000   | 1.221141000  | 2.107997000  |
| C | 1.544828000   | 3.441857000  | 1.693602000  |
| O | -2.203845000  | 3.842400000  | -2.099596000 |
| O | -2.397638000  | 1.969437000  | -4.053173000 |
| O | -3.102954000  | 1.253151000  | -0.635395000 |
| H | -2.281900000  | 2.957200000  | 0.194345000  |
| H | -2.422449000  | 3.845813000  | -3.044437000 |
| H | -0.474801000  | 2.720709000  | -1.882901000 |
| H | -1.612826000  | 1.884044000  | -4.607773000 |
| H | -1.407837000  | 0.662378000  | -2.773053000 |
| H | -4.175295000  | 1.838863000  | -2.303027000 |
| H | 2.601871000   | -0.680193000 | 2.609120000  |
| H | 3.642898000   | 0.579381000  | 3.188216000  |
| H | -1.541353000  | -0.662594000 | 0.018816000  |
| H | 1.852039000   | 4.472871000  | 1.833814000  |
| C | -3.858552000  | -0.293902000 | -2.339858000 |
| H | -3.973349000  | -0.397680000 | -3.419791000 |
| H | -3.125526000  | -1.021192000 | -1.989491000 |
| S | -5.468383000  | -0.657861000 | -1.558238000 |
| C | -5.762391000  | -2.238728000 | -2.127608000 |
| H | -9.085892000  | -1.792940000 | -0.584320000 |
| H | -5.125802000  | -2.695342000 | -2.870452000 |
| H | -6.663349000  | -2.727093000 | -1.790121000 |
| N | -7.674579000  | 2.809427000  | -0.091411000 |
| N | -5.845090000  | 3.381354000  | -1.258994000 |
| N | -5.160373000  | 5.267663000  | 1.856905000  |
| N | -7.233732000  | 4.057848000  | 1.961319000  |
| N | -3.749290000  | 5.249986000  | 0.015357000  |
| C | -8.941036000  | 2.185006000  | 0.240472000  |
| C | -10.108704000 | 2.588373000  | -0.679423000 |
| C | -10.277361000 | 1.346576000  | -1.575323000 |
| C | -9.869855000  | 0.211285000  | -0.638697000 |
| C | -9.391293000  | -1.048271000 | -1.319987000 |
| C | -6.957120000  | 2.694417000  | -1.261429000 |
| C | -5.813101000  | 3.986937000  | -0.016661000 |
| C | -6.943573000  | 3.645411000  | 0.723770000  |
| C | -4.883204000  | 4.838591000  | 0.610892000  |
| C | -6.291207000  | 4.864146000  | 2.445172000  |
| O | -11.259810000 | 2.777824000  | 0.126576000  |
| O | -11.612504000 | 1.161166000  | -2.016576000 |
| O | -8.798264000  | 0.773316000  | 0.139685000  |
| H | -9.165072000  | 2.481745000  | 1.265281000  |
| H | -12.017137000 | 2.469140000  | -0.394113000 |
| H | -9.878106000  | 3.494640000  | -1.245009000 |
| H | -11.743378000 | 1.638567000  | -2.844380000 |

|   |               |              |              |
|---|---------------|--------------|--------------|
| H | -9.589572000  | 1.396678000  | -2.423251000 |
| H | -10.719675000 | -0.008741000 | 0.018344000  |
| H | -8.544591000  | -0.831967000 | -1.972757000 |
| H | -10.200344000 | -1.469162000 | -1.918931000 |
| H | -3.414211000  | 4.803498000  | -0.829279000 |
| H | -3.085614000  | 5.767366000  | 0.568029000  |
| H | -7.296709000  | 2.069446000  | -2.070522000 |
| H | -6.456938000  | 5.243341000  | 3.448204000  |

### 27-RC-complex

|   |              |              |              |
|---|--------------|--------------|--------------|
| H | -0.466268000 | 0.062947000  | -0.678597000 |
| C | -0.470244000 | -2.888611000 | -2.301913000 |
| H | -1.460550000 | -3.096167000 | -2.712072000 |
| H | 0.259856000  | -3.116973000 | -3.076975000 |
| H | -0.285621000 | -3.521746000 | -1.442989000 |
| C | -0.380653000 | -1.411917000 | -2.005611000 |
| H | -2.045746000 | -2.855799000 | 1.639980000  |
| H | -0.826474000 | -0.756431000 | 1.228265000  |
| H | 1.563084000  | -2.936495000 | 2.636584000  |
| H | -1.913021000 | -3.293892000 | -0.046059000 |
| O | -0.246333000 | -0.607296000 | -2.933745000 |
| C | 0.539507000  | -2.385341000 | 1.025590000  |
| C | -0.687724000 | -1.593354000 | 0.544574000  |
| N | -0.473348000 | -0.948164000 | -0.738104000 |
| C | -1.979622000 | -2.444776000 | 0.631060000  |
| O | 1.288610000  | -2.964577000 | 0.244831000  |
| N | 0.737184000  | -2.426947000 | 2.359594000  |
| C | -3.205638000 | -1.619804000 | 0.326995000  |
| C | -3.672889000 | -0.684275000 | 1.253231000  |
| C | -3.871936000 | -1.738658000 | -0.891607000 |
| C | -4.774881000 | 0.112625000  | 0.968005000  |
| H | -3.169339000 | -0.577447000 | 2.207277000  |
| C | -4.977068000 | -0.943894000 | -1.182019000 |
| H | -3.527274000 | -2.460641000 | -1.621296000 |
| C | -5.431281000 | -0.014452000 | -0.253402000 |
| H | -5.122515000 | 0.832049000  | 1.698822000  |
| H | -5.479623000 | -1.050046000 | -2.135270000 |
| H | -6.288660000 | 0.607161000  | -0.478257000 |
| C | 0.021905000  | -1.697638000 | 3.398763000  |
| H | 0.116199000  | -0.618247000 | 3.269791000  |
| H | -1.034034000 | -1.965786000 | 3.429226000  |
| H | 0.461290000  | -1.963360000 | 4.356886000  |
| N | 1.709533000  | 1.543146000  | -0.042448000 |
| N | 3.060578000  | 0.094304000  | -1.101091000 |
| N | 3.824295000  | -0.856352000 | 2.397038000  |
| N | 2.211442000  | 0.919451000  | 2.267807000  |

|   |              |              |              |
|---|--------------|--------------|--------------|
| N | 4.805147000  | -1.835064000 | 0.535731000  |
| C | 0.671888000  | 2.524063000  | 0.186418000  |
| C | 0.713529000  | 3.742570000  | -0.747023000 |
| C | -0.434425000 | 3.463035000  | -1.735624000 |
| C | -1.456531000 | 2.715195000  | -0.866917000 |
| C | -2.387467000 | 1.843677000  | -1.607131000 |
| C | 2.177112000  | 1.044808000  | -1.242907000 |
| C | 3.183622000  | -0.065584000 | 0.266782000  |
| C | 2.349822000  | 0.819049000  | 0.942973000  |
| C | 3.948118000  | -0.940371000 | 1.060599000  |
| C | 2.985894000  | 0.048948000  | 2.912146000  |
| O | 0.428630000  | 4.892788000  | 0.030107000  |
| O | -1.012511000 | 4.648118000  | -2.250493000 |
| O | -0.607455000 | 1.904380000  | 0.003125000  |
| H | 0.775784000  | 2.845478000  | 1.221840000  |
| H | -0.051292000 | 5.506463000  | -0.546851000 |
| H | 1.682090000  | 3.841912000  | -1.243668000 |
| H | -0.543280000 | 4.910706000  | -3.051305000 |
| H | -0.091528000 | 2.807004000  | -2.539249000 |
| H | -1.991823000 | 3.443795000  | -0.252332000 |
| H | -1.983466000 | 1.096442000  | -2.278165000 |
| H | -3.450472000 | 1.876443000  | -1.425960000 |
| H | 4.799372000  | -2.008626000 | -0.454625000 |
| H | 5.222306000  | -2.523875000 | 1.138950000  |
| H | 1.811243000  | 1.412909000  | -2.186950000 |
| H | 2.924232000  | 0.066225000  | 3.994900000  |

### **27-PC-complex**

|   |              |              |              |
|---|--------------|--------------|--------------|
| H | 0.793776000  | 0.129616000  | -1.673178000 |
| C | -0.218089000 | 2.925050000  | -0.055771000 |
| H | -0.853778000 | 2.456601000  | 0.691290000  |
| H | 0.454286000  | 3.631144000  | 0.424061000  |
| H | -0.856768000 | 3.474181000  | -0.749120000 |
| C | 0.626009000  | 1.923472000  | -0.794266000 |
| H | -3.212924000 | 0.523161000  | -1.702184000 |
| H | -3.076798000 | -2.977431000 | 1.831692000  |
| H | -2.011113000 | -2.770246000 | -2.609060000 |
| H | -2.289267000 | 1.965506000  | -1.486696000 |
| O | 1.818701000  | 2.122814000  | -0.998689000 |
| C | -1.107461000 | -1.135094000 | -2.001305000 |
| C | -1.165030000 | 0.182651000  | -1.356633000 |
| N | 0.090635000  | 0.734370000  | -1.249101000 |
| C | -2.418019000 | 0.954706000  | -1.093940000 |
| O | -0.035358000 | -1.517524000 | -2.515405000 |
| N | -2.210220000 | -1.926482000 | -2.093715000 |
| C | -2.914514000 | 1.058345000  | 0.341453000  |

|   |              |              |              |
|---|--------------|--------------|--------------|
| C | -3.969105000 | 1.928825000  | 0.623852000  |
| C | -2.361271000 | 0.315708000  | 1.381070000  |
| C | -4.458607000 | 2.054712000  | 1.917676000  |
| H | -4.405363000 | 2.516085000  | -0.176123000 |
| C | -2.848815000 | 0.441329000  | 2.679412000  |
| H | -1.551287000 | -0.371282000 | 1.178299000  |
| C | -3.897554000 | 1.310529000  | 2.953426000  |
| H | -5.275815000 | 2.735927000  | 2.119444000  |
| H | -2.407238000 | -0.143355000 | 3.476598000  |
| H | -4.275753000 | 1.409757000  | 3.962898000  |
| C | -3.375034000 | -1.986090000 | -1.219821000 |
| H | -3.144987000 | -1.585785000 | -0.237196000 |
| H | -4.232582000 | -1.451364000 | -1.632712000 |
| H | -3.654836000 | -3.030938000 | -1.096237000 |
| N | 1.430844000  | -1.528190000 | 1.065011000  |
| N | 1.931082000  | 0.131555000  | 2.490670000  |
| N | 4.661106000  | 0.628954000  | 0.037501000  |
| N | 3.224309000  | -1.202738000 | -0.560067000 |
| N | 4.350119000  | 1.939657000  | 1.925528000  |
| C | 0.743262000  | -2.668294000 | 0.469958000  |
| C | 1.219504000  | -4.027730000 | 1.003543000  |
| C | 0.128759000  | -4.375863000 | 2.031814000  |
| C | -1.119552000 | -3.766586000 | 1.396527000  |
| C | -2.238410000 | -3.436086000 | 2.354809000  |
| C | 1.115478000  | -0.858379000 | 2.224958000  |
| C | 2.844747000  | 0.112273000  | 1.454723000  |
| C | 2.549947000  | -0.910630000 | 0.557076000  |
| C | 3.958163000  | 0.915263000  | 1.146115000  |
| C | 4.259315000  | -0.384058000 | -0.737122000 |
| O | 1.203277000  | -4.952391000 | -0.071356000 |
| O | -0.045489000 | -5.771968000 | 2.206761000  |
| O | -0.635626000 | -2.558145000 | 0.778858000  |
| H | 0.904646000  | -2.607109000 | -0.606059000 |
| H | 0.956813000  | -5.811637000 | 0.302982000  |
| H | 2.217066000  | -3.957801000 | 1.444424000  |
| H | 0.562353000  | -6.085599000 | 2.886907000  |
| H | 0.342506000  | -3.882340000 | 2.983895000  |
| H | -1.475435000 | -4.447640000 | 0.615461000  |
| H | -1.894394000 | -2.750251000 | 3.130398000  |
| H | -2.589655000 | -4.353200000 | 2.829953000  |
| H | 3.784554000  | 2.227573000  | 2.704689000  |
| H | 5.093676000  | 2.542029000  | 1.616290000  |
| H | 0.263271000  | -1.142362000 | 2.817871000  |
| H | 4.858839000  | -0.559536000 | -1.624253000 |

## 28-RC-complex

|   |              |              |              |
|---|--------------|--------------|--------------|
| H | -0.169575000 | 1.685221000  | 3.546211000  |
| C | 2.573957000  | 0.224250000  | 2.291939000  |
| H | 2.749182000  | 0.761033000  | 1.359145000  |
| H | 3.522025000  | 0.081648000  | 2.803893000  |
| H | 2.132733000  | -0.741630000 | 2.056491000  |
| C | 1.668242000  | 1.028638000  | 3.192457000  |
| H | -1.347457000 | 1.189083000  | 1.781563000  |
| H | -2.130837000 | -2.316593000 | 1.935742000  |
| O | 2.098553000  | 1.549310000  | 4.223599000  |
| C | -0.814445000 | -0.852287000 | 2.180945000  |
| C | -0.436437000 | 0.593068000  | 1.795814000  |
| N | 0.372348000  | 1.215443000  | 2.835816000  |
| O | -0.077064000 | -1.528723000 | 2.895457000  |
| N | -1.966830000 | -1.350951000 | 1.691985000  |
| C | 0.163957000  | 0.627362000  | 0.396673000  |
| C | -0.618379000 | 1.217339000  | -0.749388000 |
| C | 0.568835000  | 1.949001000  | -0.193035000 |
| H | 0.793603000  | -0.215794000 | 0.146244000  |
| H | -1.599368000 | 1.621893000  | -0.538636000 |
| H | -0.528689000 | 0.741543000  | -1.716690000 |
| H | 1.479552000  | 1.983545000  | -0.775664000 |
| H | 0.382091000  | 2.831334000  | 0.405117000  |
| C | -2.947973000 | -0.706868000 | 0.831405000  |
| H | -3.163128000 | 0.306727000  | 1.168617000  |
| H | -2.619997000 | -0.671231000 | -0.207544000 |
| H | -3.872475000 | -1.277070000 | 0.886588000  |
| N | -0.796805000 | 0.648652000  | 6.231570000  |
| N | -0.003622000 | 2.408772000  | 7.375821000  |
| N | 2.726201000  | -0.002564000 | 8.048613000  |
| N | 0.989669000  | -0.952134000 | 6.684991000  |
| N | 2.671781000  | 2.167574000  | 8.867931000  |
| C | -1.676757000 | -0.164569000 | 5.413805000  |
| C | -2.911539000 | -0.711521000 | 6.150420000  |
| C | -4.042207000 | 0.208408000  | 5.652918000  |
| C | -3.582334000 | 0.511227000  | 4.210052000  |
| C | -4.141368000 | 1.721672000  | 3.590010000  |
| C | -0.974793000 | 1.956968000  | 6.624096000  |
| C | 0.865793000  | 1.341538000  | 7.493623000  |
| C | 0.392295000  | 0.238782000  | 6.787581000  |
| C | 2.102463000  | 1.184826000  | 8.145733000  |
| C | 2.147220000  | -0.979765000 | 7.340961000  |
| O | -3.126944000 | -2.042250000 | 5.714022000  |
| O | -5.304997000 | -0.427503000 | 5.634911000  |
| O | -2.155895000 | 0.645750000  | 4.346454000  |
| H | -1.076055000 | -0.988577000 | 5.029267000  |
| H | -4.084455000 | -2.191273000 | 5.730884000  |

|   |              |              |             |
|---|--------------|--------------|-------------|
| H | -2.780604000 | -0.669911000 | 7.234822000 |
| H | -5.751248000 | -0.275103000 | 6.476133000 |
| H | -4.066302000 | 1.130776000  | 6.236803000 |
| H | -3.812883000 | -0.377350000 | 3.609152000 |
| H | -3.683925000 | 2.681888000  | 3.783399000 |
| H | -5.076540000 | 1.671108000  | 3.053213000 |
| H | 2.270400000  | 3.088874000  | 8.873485000 |
| H | 3.597961000  | 2.038943000  | 9.238125000 |
| H | -1.832825000 | 2.524051000  | 6.302956000 |
| H | 2.697033000  | -1.914224000 | 7.299961000 |

### 28-PC-complex

|   |              |              |              |
|---|--------------|--------------|--------------|
| H | -0.612289000 | -0.088554000 | 3.135636000  |
| C | 2.134269000  | -1.149846000 | 1.518853000  |
| H | 2.954910000  | -0.451818000 | 1.350903000  |
| H | 2.565340000  | -2.089592000 | 1.861767000  |
| H | 1.608697000  | -1.306525000 | 0.580849000  |
| C | 1.249645000  | -0.631072000 | 2.624757000  |
| H | -3.610263000 | 0.884059000  | 2.876435000  |
| H | -3.622116000 | -1.004794000 | 0.043199000  |
| O | 1.613190000  | -0.667733000 | 3.797042000  |
| C | -1.908539000 | -0.734820000 | 0.984008000  |
| C | -0.627573000 | -0.026305000 | 1.084709000  |
| N | -0.000586000 | -0.154228000 | 2.319573000  |
| O | -2.149850000 | -1.681785000 | 1.754329000  |
| N | -2.817529000 | -0.397048000 | 0.024618000  |
| C | -0.037063000 | 0.774272000  | 0.005635000  |
| C | -0.104906000 | 2.309230000  | 0.060607000  |
| C | 1.204672000  | 1.611465000  | 0.185241000  |
| H | -0.187937000 | 0.368494000  | -0.986860000 |
| H | -0.531819000 | 2.741173000  | 0.955812000  |
| H | -0.357208000 | 2.814994000  | -0.861353000 |
| H | 1.892940000  | 1.642379000  | -0.648545000 |
| H | 1.677164000  | 1.623793000  | 1.156430000  |
| C | -2.998443000 | 0.876986000  | -0.663079000 |
| H | -2.767913000 | 1.716440000  | -0.009553000 |
| H | -2.386886000 | 0.955831000  | -1.562074000 |
| H | -4.043742000 | 0.950969000  | -0.956074000 |
| N | -0.579911000 | 0.891692000  | 6.569285000  |
| N | -0.442221000 | 2.982331000  | 7.373270000  |
| N | 2.380783000  | 1.454464000  | 9.223863000  |
| N | 1.274450000  | -0.124318000 | 7.787870000  |
| N | 1.734311000  | 3.672159000  | 9.433631000  |
| C | -1.049791000 | -0.265834000 | 5.816473000  |
| C | -2.060949000 | -1.125589000 | 6.585951000  |
| C | -3.407303000 | -0.620851000 | 6.034607000  |

|   |              |              |              |
|---|--------------|--------------|--------------|
| C | -3.065590000 | -0.307642000 | 4.581114000  |
| C | -3.946737000 | 0.708843000  | 3.898436000  |
| C | -1.085517000 | 2.171333000  | 6.570710000  |
| C | 0.542450000  | 2.196313000  | 7.939265000  |
| C | 0.473795000  | 0.893110000  | 7.451244000  |
| C | 1.560799000  | 2.461802000  | 8.874723000  |
| C | 2.195452000  | 0.248787000  | 8.673529000  |
| O | -1.851160000 | -2.479465000 | 6.223582000  |
| O | -4.428597000 | -1.603371000 | 6.085878000  |
| O | -1.710451000 | 0.203668000  | 4.651498000  |
| H | -0.169642000 | -0.848916000 | 5.546041000  |
| H | -2.720785000 | -2.907243000 | 6.224669000  |
| H | -1.962913000 | -0.988556000 | 7.665787000  |
| H | -4.872735000 | -1.556677000 | 6.940822000  |
| H | -3.708822000 | 0.289245000  | 6.559950000  |
| H | -3.050946000 | -1.238625000 | 4.009742000  |
| H | -3.942765000 | 1.656646000  | 4.439476000  |
| H | -4.969664000 | 0.331300000  | 3.860213000  |
| H | 1.169914000  | 4.452298000  | 9.146635000  |
| H | 2.507774000  | 3.829413000  | 10.056585000 |
| H | -1.915070000 | 2.441224000  | 5.939721000  |
| H | 2.888320000  | -0.521731000 | 8.995021000  |

Cartesian coordinates of Substrates• radical and Ado-H for substrates **1-28**.

**1A•**

|   |              |              |              |
|---|--------------|--------------|--------------|
| H | 7.131665000  | 0.128468000  | 0.176429000  |
| H | 4.116280000  | -1.581563000 | 0.224081000  |
| H | 3.966084000  | -0.391882000 | 1.488280000  |
| H | 2.644874000  | 1.094456000  | -0.062472000 |
| H | 2.793826000  | -0.101788000 | -1.331415000 |
| H | 1.560428000  | -1.763106000 | 0.088234000  |
| H | 1.412469000  | -0.564352000 | 1.359227000  |
| H | 0.111495000  | 0.911300000  | -0.183812000 |
| H | 0.248527000  | -0.288496000 | -1.454228000 |
| H | -0.979431000 | -1.943112000 | -0.041405000 |
| H | -1.134335000 | -0.752039000 | 1.240698000  |
| H | -1.499262000 | 2.226296000  | 1.330305000  |
| H | -2.925967000 | 1.274041000  | 2.052845000  |
| H | -3.657335000 | -2.053142000 | -0.240207000 |
| H | -2.249813000 | -0.449509000 | -1.579859000 |
| H | -2.319432000 | 1.773312000  | -0.929132000 |
| H | -4.796275000 | 1.776608000  | -0.045691000 |
| O | 5.317547000  | 1.048700000  | -0.906455000 |
| O | 6.352095000  | -0.337506000 | 0.520535000  |
| C | 5.254955000  | 0.165622000  | -0.083557000 |



|   |              |              |              |
|---|--------------|--------------|--------------|
| C | 3.998899000  | -0.508101000 | 0.400732000  |
| C | 2.725432000  | 0.019896000  | -0.247098000 |
| C | 1.474849000  | -0.686463000 | 0.272264000  |
| C | 0.189905000  | -0.164870000 | -0.367480000 |
| C | -1.060915000 | -0.869507000 | 0.156113000  |
| C | -2.374531000 | 1.609674000  | 1.184756000  |
| O | -5.811174000 | -0.614513000 | 0.032158000  |
| C | -4.643622000 | -0.264675000 | -0.098943000 |
| N | -3.536180000 | -1.073799000 | -0.034888000 |
| C | -2.340489000 | -0.365096000 | -0.489536000 |
| C | -2.745022000 | 1.119093000  | -0.168000000 |
| N | -4.202150000 | 1.016316000  | -0.339009000 |

**1B•**

|   |              |              |              |
|---|--------------|--------------|--------------|
| 1 | 4.165794000  | -1.587120000 | 0.222987000  |
| 1 | 4.025322000  | -0.406479000 | 1.496574000  |
| 1 | 2.710816000  | 1.092343000  | -0.036240000 |
| 1 | 2.853076000  | -0.091331000 | -1.312558000 |
| 1 | 1.618326000  | -1.762667000 | 0.098873000  |
| 1 | 1.470381000  | -0.569665000 | 1.374040000  |
| 1 | 0.170732000  | 0.913011000  | -0.164945000 |
| 1 | 0.309436000  | -0.281820000 | -1.439254000 |
| 1 | -0.920392000 | -1.941682000 | -0.031396000 |
| 1 | -1.082538000 | -0.750918000 | 1.249921000  |
| 1 | -1.449187000 | 2.220509000  | 1.338707000  |
| 1 | -2.886735000 | 1.277092000  | 2.051536000  |
| 1 | -3.597864000 | -2.054884000 | -0.241251000 |
| 1 | -2.184922000 | -0.450141000 | -1.575840000 |
| 1 | -2.258736000 | 1.772345000  | -0.926158000 |
| 1 | -4.741403000 | 1.773789000  | -0.057075000 |
| 8 | 5.338995000  | 1.076730000  | -0.892884000 |
| 8 | 6.442929000  | -0.322832000 | 0.468994000  |
| 6 | 5.395293000  | 0.144512000  | -0.052493000 |
| 6 | 4.073515000  | -0.511286000 | 0.407131000  |
| 6 | 2.792291000  | 0.018004000  | -0.225699000 |
| 6 | 1.535679000  | -0.685580000 | 0.285859000  |
| 6 | 0.249605000  | -0.162858000 | -0.351742000 |
| 6 | -1.003754000 | -0.867967000 | 0.165548000  |
| 6 | -2.327574000 | 1.609794000  | 1.187264000  |
| 8 | -5.754903000 | -0.617579000 | 0.015516000  |
| 6 | -4.586651000 | -0.267066000 | -0.109152000 |
| 7 | -3.479134000 | -1.074879000 | -0.037840000 |
| 6 | -2.281000000 | -0.365572000 | -0.485961000 |
| 6 | -2.688953000 | 1.118207000  | -0.167524000 |
| 7 | -4.145006000 | 1.014301000  | -0.347919000 |

**2A•**

|   |              |              |              |
|---|--------------|--------------|--------------|
| O | 4.330373000  | -0.531169000 | -0.448864000 |
| P | 2.809684000  | -0.447297000 | -0.047934000 |
| O | 2.590975000  | 1.135499000  | 0.191237000  |
| O | 2.128828000  | -0.764512000 | -1.431390000 |
| O | 2.375609000  | -1.251460000 | 1.105983000  |
| C | 1.415241000  | 1.639737000  | 0.703231000  |
| C | 0.327686000  | 1.895616000  | -0.262339000 |
| C | -0.923923000 | 2.524164000  | 0.341353000  |
| O | -0.123947000 | 0.600647000  | -0.839162000 |
| C | -1.511233000 | 0.397241000  | -0.567794000 |
| C | -1.821536000 | 1.307466000  | 0.624198000  |
| N | -1.794883000 | -0.997394000 | -0.383940000 |
| O | -1.518378000 | 3.366033000  | -0.633593000 |
| O | -3.200890000 | 1.621765000  | 0.621018000  |
| C | -1.399695000 | -1.853030000 | 0.638721000  |
| C | -2.012953000 | -3.046814000 | 0.364329000  |
| N | -2.767695000 | -2.952725000 | -0.789929000 |
| C | -2.606398000 | -1.729717000 | -1.216662000 |
| N | -0.607367000 | -1.425720000 | 1.704438000  |
| H | 4.917915000  | -0.728925000 | 0.293699000  |
| H | 1.199012000  | -0.436416000 | -1.441936000 |
| H | 1.285053000  | 1.576210000  | 1.775130000  |
| H | 0.690310000  | 2.487781000  | -1.103933000 |
| H | -0.695604000 | 3.083181000  | 1.253114000  |
| H | -2.104236000 | 0.726259000  | -1.424133000 |
| H | -1.516977000 | 0.817280000  | 1.548181000  |
| H | -2.463861000 | 3.411408000  | -0.427666000 |
| H | -3.489294000 | 1.795238000  | 1.524357000  |
| H | -1.948202000 | -3.957374000 | 0.937802000  |
| H | -3.032443000 | -1.297934000 | -2.108499000 |
| H | 0.364714000  | -1.255984000 | 1.451247000  |
| H | -0.625748000 | -2.102803000 | 2.455601000  |

**2B•**

|   |              |              |              |
|---|--------------|--------------|--------------|
| O | 3.944407000  | -0.050260000 | 1.284794000  |
| P | 3.296371000  | -0.524473000 | -0.130910000 |
| O | 2.425862000  | 0.823305000  | -0.568003000 |
| O | 4.380415000  | -0.621404000 | -1.137409000 |
| O | 2.325313000  | -1.630167000 | 0.129749000  |
| C | 1.404063000  | 1.283260000  | 0.198432000  |
| C | 0.210291000  | 1.747333000  | -0.532668000 |
| C | -0.816503000 | 2.454863000  | 0.347550000  |
| O | -0.511025000 | 0.588019000  | -1.117994000 |
| C | -1.802785000 | 0.489317000  | -0.551943000 |
| C | -1.761094000 | 1.311137000  | 0.740489000  |

|   |              |              |              |
|---|--------------|--------------|--------------|
| N | -2.183046000 | -0.892054000 | -0.381761000 |
| O | -1.506502000 | 3.421548000  | -0.434658000 |
| O | -3.070870000 | 1.744213000  | 1.067157000  |
| C | -1.583466000 | -1.867566000 | 0.399775000  |
| C | -2.387097000 | -2.973297000 | 0.275168000  |
| N | -3.457091000 | -2.703333000 | -0.557948000 |
| C | -3.299066000 | -1.463366000 | -0.940022000 |
| N | -0.451982000 | -1.614062000 | 1.170089000  |
| H | 3.448975000  | -0.410357000 | 2.030244000  |
| H | 1.338889000  | 0.936187000  | 1.223400000  |
| H | 0.497435000  | 2.378783000  | -1.375027000 |
| H | -0.350752000 | 2.923811000  | 1.218796000  |
| H | -2.552109000 | 0.929397000  | -1.217835000 |
| H | -1.319888000 | 0.715181000  | 1.539642000  |
| H | -2.380546000 | 3.534643000  | -0.033309000 |
| H | -3.128072000 | 1.890650000  | 2.018198000  |
| H | -2.246238000 | -3.936308000 | 0.739157000  |
| H | -3.935036000 | -0.912461000 | -1.614709000 |
| H | 0.394016000  | -1.411004000 | 0.634256000  |
| H | -0.254268000 | -2.397414000 | 1.778389000  |

## 2C•

|   |              |              |              |
|---|--------------|--------------|--------------|
| O | 3.851453000  | 0.001817000  | 1.338969000  |
| P | 3.321859000  | -0.472965000 | 0.000217000  |
| O | 2.379119000  | 0.862505000  | -0.595341000 |
| O | 4.340763000  | -0.621611000 | -1.107665000 |
| O | 2.290801000  | -1.593885000 | 0.089567000  |
| C | 1.383792000  | 1.351778000  | 0.158888000  |
| C | 0.178887000  | 1.805084000  | -0.558879000 |
| C | -0.862211000 | 2.464517000  | 0.337407000  |
| O | -0.540708000 | 0.645881000  | -1.177599000 |
| C | -1.788982000 | 0.462825000  | -0.550467000 |
| C | -1.746206000 | 1.279464000  | 0.745444000  |
| N | -2.086214000 | -0.941870000 | -0.372380000 |
| O | -1.613781000 | 3.404223000  | -0.424615000 |
| O | -3.067102000 | 1.653435000  | 1.110079000  |
| C | -1.440890000 | -1.885436000 | 0.415668000  |
| C | -2.181751000 | -3.033995000 | 0.274111000  |
| N | -3.253308000 | -2.823337000 | -0.573250000 |
| C | -3.158841000 | -1.574112000 | -0.948031000 |
| N | -0.337942000 | -1.579622000 | 1.206874000  |
| H | 1.318246000  | 1.023961000  | 1.191634000  |
| H | 0.440476000  | 2.451810000  | -1.398516000 |
| H | -0.402243000 | 2.951392000  | 1.201916000  |
| H | -2.596390000 | 0.856872000  | -1.177031000 |
| H | -1.259999000 | 0.699676000  | 1.529686000  |

|   |              |              |              |
|---|--------------|--------------|--------------|
| H | -2.485048000 | 3.468043000  | -0.006981000 |
| H | -3.099209000 | 1.805415000  | 2.061320000  |
| H | -1.994898000 | -3.988573000 | 0.739846000  |
| H | -3.815273000 | -1.057846000 | -1.630730000 |
| H | 0.540667000  | -1.404948000 | 0.691395000  |
| H | -0.159116000 | -2.337189000 | 1.853481000  |

### 3•

|   |              |              |              |
|---|--------------|--------------|--------------|
| H | 4.345306000  | 1.228870000  | -0.712734000 |
| H | -5.638997000 | -0.192665000 | 0.017051000  |
| H | -4.724782000 | -1.284579000 | 1.085197000  |
| H | -4.695489000 | -1.556574000 | -0.649021000 |
| H | -2.173667000 | -1.203606000 | -0.945070000 |
| H | -2.134809000 | -1.303094000 | 0.789561000  |
| H | -0.988093000 | 0.943913000  | 0.893581000  |
| H | -1.031780000 | 1.041853000  | -0.851352000 |
| H | 0.380398000  | -1.024935000 | -1.008159000 |
| H | 0.422165000  | -1.130524000 | 0.740961000  |
| H | 1.566048000  | 1.104337000  | 0.846723000  |
| H | 1.492429000  | 1.225051000  | -0.890557000 |
| H | 2.904319000  | -1.190781000 | -0.656332000 |
| O | -3.613703000 | 1.324763000  | -0.003992000 |
| C | 5.382268000  | -0.455141000 | 0.148269000  |
| C | 4.173152000  | 0.478889000  | 0.078474000  |
| C | -4.727397000 | -0.778272000 | 0.116134000  |
| C | -3.513270000 | 0.113054000  | 0.019728000  |
| C | -2.172587000 | -0.586144000 | -0.038521000 |
| C | -0.963178000 | 0.338452000  | -0.017127000 |
| C | 0.358270000  | -0.423323000 | -0.092783000 |
| C | 1.582346000  | 0.494666000  | -0.066988000 |
| C | 2.882974000  | -0.220641000 | -0.168154000 |
| H | 4.100813000  | 1.065749000  | 1.003667000  |
| H | 6.305887000  | 0.103343000  | 0.311339000  |
| H | 5.273204000  | -1.173758000 | 0.963692000  |
| H | 5.491213000  | -1.019943000 | -0.780795000 |

### 4•

|   |              |              |              |
|---|--------------|--------------|--------------|
| C | 3.365152000  | 0.201904000  | -0.059140000 |
| C | 1.859957000  | 0.255350000  | 0.003396000  |
| O | 1.262809000  | 1.327268000  | -0.036273000 |
| N | 1.233567000  | -0.964890000 | 0.093878000  |
| C | -0.086777000 | -1.359636000 | 0.157182000  |
| C | -1.360225000 | -0.647234000 | 0.093711000  |
| O | -2.396769000 | -1.335714000 | 0.169524000  |
| N | -1.398963000 | 0.690816000  | -0.046423000 |
| C | -2.656400000 | 1.405776000  | -0.107369000 |

|   |              |              |              |
|---|--------------|--------------|--------------|
| H | 3.680501000  | 0.553055000  | -1.043318000 |
| H | -0.199936000 | -2.427704000 | 0.257783000  |
| H | 1.872029000  | -1.746313000 | 0.130803000  |
| H | -3.260413000 | 1.070406000  | -0.953350000 |
| H | -0.514200000 | 1.189637000  | -0.073418000 |
| H | -2.446554000 | 2.466934000  | -0.221770000 |
| H | -3.243046000 | 1.255611000  | 0.802046000  |
| H | 3.780751000  | -0.789425000 | 0.110917000  |
| H | 3.765680000  | 0.892990000  | 0.682199000  |

### 5•

|   |              |              |              |
|---|--------------|--------------|--------------|
| C | 2.766433000  | 2.229437000  | -0.061952000 |
| N | 1.895503000  | 1.375340000  | -0.387404000 |
| C | 1.683329000  | 0.248318000  | 0.509789000  |
| C | 2.130812000  | -1.120224000 | -0.184152000 |
| O | 1.855864000  | -1.264702000 | -1.392426000 |
| C | 0.253013000  | 0.099067000  | 0.886126000  |
| C | -0.841845000 | 0.261142000  | -0.110461000 |
| C | -2.224961000 | -0.008232000 | 0.484132000  |
| C | -3.319217000 | 0.177768000  | -0.550382000 |
| N | -4.675107000 | -0.112889000 | 0.045382000  |
| O | 2.678762000  | -1.934858000 | 0.591413000  |
| H | 3.357305000  | 2.169616000  | 0.860865000  |
| H | 2.297041000  | 0.335125000  | 1.415353000  |
| H | 0.052660000  | -0.469758000 | 1.787412000  |
| H | -0.811248000 | 1.267183000  | -0.544077000 |
| H | -0.662181000 | -0.418508000 | -0.957909000 |
| H | -2.399445000 | 0.667749000  | 1.326118000  |
| H | -2.261474000 | -1.028916000 | 0.875918000  |
| H | -3.358903000 | 1.199925000  | -0.921598000 |
| H | -3.201860000 | -0.498779000 | -1.394613000 |
| H | -5.424187000 | 0.030546000  | -0.633671000 |
| H | -4.737283000 | -1.078916000 | 0.371626000  |
| H | -4.866332000 | 0.493065000  | 0.845639000  |
| H | 2.959100000  | 3.077844000  | -0.716623000 |

### 6A•

|   |              |              |              |
|---|--------------|--------------|--------------|
| C | -3.107384000 | 1.289375000  | 0.267574000  |
| N | -1.908829000 | 0.950359000  | 0.472534000  |
| C | -1.278393000 | 0.093983000  | -0.532531000 |
| C | -0.848724000 | -1.241257000 | 0.084106000  |
| O | -0.320327000 | -1.116558000 | 1.309925000  |
| C | -0.060969000 | 0.743019000  | -1.127331000 |
| C | 1.024009000  | 1.316711000  | -0.307166000 |
| O | -0.935075000 | -2.298324000 | -0.496636000 |
| H | -3.688135000 | 0.970527000  | -0.605519000 |

|   |              |              |              |
|---|--------------|--------------|--------------|
| H | -1.972657000 | -0.174275000 | -1.336620000 |
| H | 0.132678000  | 0.510413000  | -2.166090000 |
| H | 1.478642000  | 2.168475000  | -0.825444000 |
| H | 0.653260000  | 1.682579000  | 0.649472000  |
| H | -3.607308000 | 1.936192000  | 0.985612000  |
| C | 2.230405000  | 0.343726000  | -0.005383000 |
| O | 2.334259000  | -0.688835000 | -0.705616000 |
| O | 2.997238000  | 0.724906000  | 0.908173000  |
| H | 0.002897000  | -1.989278000 | 1.588464000  |

**6B•**

|   |              |              |              |
|---|--------------|--------------|--------------|
| C | -2.474585000 | 2.182326000  | -0.144149000 |
| N | -1.592331000 | 1.386732000  | 0.284015000  |
| C | -1.279822000 | 0.219543000  | -0.531615000 |
| C | -1.733972000 | -1.113846000 | 0.228657000  |
| O | -2.346602000 | -1.937179000 | -0.484986000 |
| C | 0.174738000  | 0.107431000  | -0.802565000 |
| C | 1.163786000  | 0.336385000  | 0.280213000  |
| O | -1.401230000 | -1.218903000 | 1.427116000  |
| H | -3.002309000 | 2.045031000  | -1.096184000 |
| H | -1.834607000 | 0.229824000  | -1.477058000 |
| H | 0.482481000  | -0.457274000 | -1.672155000 |
| H | 1.131682000  | 1.362950000  | 0.659618000  |
| H | 0.908600000  | -0.278322000 | 1.158158000  |
| H | -2.741649000 | 3.057028000  | 0.446467000  |
| C | 2.585853000  | 0.014187000  | -0.090094000 |
| O | 2.959388000  | -0.531541000 | -1.102034000 |
| O | 3.443926000  | 0.400769000  | 0.877995000  |
| H | 4.342269000  | 0.152311000  | 0.605640000  |

**6C•**

|   |              |              |              |
|---|--------------|--------------|--------------|
| C | -2.251475000 | 2.358398000  | -0.200396000 |
| N | -1.539676000 | 1.451183000  | 0.312716000  |
| C | -1.274229000 | 0.271684000  | -0.505912000 |
| C | -1.727282000 | -0.984145000 | 0.254398000  |
| O | -2.153998000 | -1.929850000 | -0.599403000 |
| C | 0.191212000  | 0.101126000  | -0.762716000 |
| C | 1.182409000  | 0.324862000  | 0.316265000  |
| O | -1.655131000 | -1.143074000 | 1.447017000  |
| H | -2.681062000 | 2.298385000  | -1.206268000 |
| H | -1.809902000 | 0.291882000  | -1.461533000 |
| H | 0.497787000  | -0.377844000 | -1.680800000 |
| H | 1.169228000  | 1.361602000  | 0.671400000  |
| H | 0.936647000  | -0.262371000 | 1.213169000  |
| H | -2.458824000 | 3.257747000  | 0.375225000  |
| C | 2.599187000  | -0.016730000 | -0.073040000 |

|   |              |              |              |
|---|--------------|--------------|--------------|
| O | 2.955682000  | -0.480727000 | -1.129117000 |
| O | 3.454524000  | 0.260460000  | 0.928881000  |
| H | 4.351652000  | 0.021989000  | 0.643100000  |
| H | -2.355349000 | -2.735313000 | -0.093922000 |

**6D•**

|   |              |              |              |
|---|--------------|--------------|--------------|
| C | -2.125413000 | 2.343744000  | -0.364769000 |
| N | -1.416743000 | 1.463449000  | 0.197246000  |
| C | -1.178028000 | 0.220873000  | -0.526335000 |
| C | -1.862493000 | -1.009983000 | 0.215990000  |
| O | -1.877949000 | -1.000797000 | 1.464547000  |
| C | 0.275755000  | -0.081113000 | -0.663052000 |
| C | 1.243933000  | 0.070110000  | 0.451669000  |
| O | -2.287205000 | -1.903783000 | -0.552965000 |
| H | -2.559276000 | 2.223134000  | -1.366030000 |
| H | -1.636487000 | 0.253083000  | -1.523695000 |
| H | 0.557073000  | -0.738563000 | -1.476052000 |
| H | 1.079413000  | 1.001572000  | 0.995022000  |
| H | 1.084222000  | -0.731896000 | 1.195925000  |
| H | -2.331833000 | 3.280419000  | 0.151227000  |
| C | 2.733382000  | -0.036759000 | 0.038302000  |
| O | 3.031556000  | -0.900986000 | -0.823845000 |
| O | 3.533759000  | 0.733925000  | 0.628770000  |

**7A•**

|   |              |              |              |
|---|--------------|--------------|--------------|
| C | -0.803476000 | -0.929368000 | -0.048504000 |
| C | -0.394127000 | 0.396959000  | 0.076159000  |
| C | -1.355183000 | 1.437436000  | 0.111085000  |
| N | 0.143052000  | -1.897891000 | -0.137554000 |
| C | 1.484948000  | -1.650304000 | 0.395486000  |
| C | 1.920495000  | -0.249552000 | 0.084321000  |
| N | 0.957711000  | 0.708269000  | 0.069298000  |
| C | 3.289828000  | 0.071190000  | -0.081043000 |
| O | 3.512317000  | 1.409793000  | -0.299052000 |
| O | 4.224181000  | -0.733092000 | -0.036779000 |
| O | -1.119882000 | 2.648304000  | 0.182526000  |
| N | -4.314794000 | -0.659046000 | -0.196030000 |
| H | -3.392737000 | 1.683866000  | 0.046237000  |
| H | -0.196174000 | -2.847410000 | -0.101519000 |
| H | 2.184228000  | -2.353866000 | -0.049722000 |
| H | 1.495069000  | -1.816418000 | 1.482386000  |
| H | 1.211765000  | 1.681089000  | -0.032106000 |
| H | -4.554733000 | -1.634204000 | -0.129669000 |
| H | -5.026681000 | 0.002346000  | 0.064747000  |
| N | -2.102905000 | -1.299291000 | -0.119156000 |
| C | -3.005161000 | -0.345154000 | -0.080906000 |

|   |              |             |              |
|---|--------------|-------------|--------------|
| N | -2.675478000 | 0.971649000 | 0.038658000  |
| H | 4.469275000  | 1.531484000 | -0.380010000 |

**7B•**

|   |              |              |              |
|---|--------------|--------------|--------------|
| C | -0.756188000 | -0.918613000 | -0.062847000 |
| C | -0.357312000 | 0.411508000  | 0.044666000  |
| C | -1.335291000 | 1.434455000  | 0.088007000  |
| N | 0.198462000  | -1.889309000 | -0.160659000 |
| C | 1.547771000  | -1.616692000 | 0.361783000  |
| C | 1.972059000  | -0.220920000 | 0.039777000  |
| N | 0.991369000  | 0.730254000  | 0.053673000  |
| C | 3.370870000  | 0.203599000  | -0.090244000 |
| O | 3.577409000  | 1.446703000  | -0.265978000 |
| O | 4.263677000  | -0.694695000 | -0.015371000 |
| O | -1.124199000 | 2.654257000  | 0.154504000  |
| N | -4.289683000 | -0.695866000 | -0.167054000 |
| H | -3.375761000 | 1.656359000  | 0.040542000  |
| H | -0.145323000 | -2.831288000 | -0.043849000 |
| H | 2.253132000  | -2.316194000 | -0.080385000 |
| H | 1.558089000  | -1.788059000 | 1.450748000  |
| H | 1.279023000  | 1.690477000  | -0.072651000 |
| H | -4.499789000 | -1.671778000 | -0.030331000 |
| H | -4.978841000 | -0.058645000 | 0.199217000  |
| N | -2.057783000 | -1.307622000 | -0.098701000 |
| C | -2.969007000 | -0.369421000 | -0.059854000 |
| N | -2.651369000 | 0.951903000  | 0.033274000  |

**8A•**

|   |              |              |              |
|---|--------------|--------------|--------------|
| O | -4.056112000 | -1.381204000 | 1.745364000  |
| O | -4.104573000 | 1.972632000  | -1.098394000 |
| C | -1.246106000 | 0.607616000  | -0.529875000 |
| C | -0.606281000 | 0.596426000  | 0.895460000  |
| C | 0.833496000  | 1.040448000  | 0.842223000  |
| C | 4.209390000  | -0.325318000 | -0.155468000 |
| C | 2.617217000  | -2.130436000 | -0.300617000 |
| O | 1.132515000  | 2.193077000  | 1.113090000  |
| H | -5.418843000 | 0.533618000  | -1.794956000 |
| O | 5.782314000  | 1.437970000  | -0.019428000 |
| O | -5.543835000 | -0.294710000 | -1.305766000 |
| C | 1.884999000  | 0.071100000  | 0.395348000  |
| O | 6.530336000  | -0.574006000 | -0.668447000 |
| C | 3.195708000  | 0.532978000  | 0.256277000  |
| C | 3.915095000  | -1.663825000 | -0.434517000 |
| H | -4.584930000 | -2.267704000 | -0.056906000 |
| H | -3.706818000 | 1.451153000  | 0.866474000  |
| H | -5.709620000 | 0.133027000  | 0.718927000  |



|   |              |              |              |
|---|--------------|--------------|--------------|
| H | -4.589004000 | 2.695694000  | -0.680013000 |
| H | -3.570300000 | -2.175123000 | 2.001750000  |
| C | 5.614646000  | 0.135097000  | -0.313040000 |
| C | 1.606079000  | -1.269553000 | 0.112127000  |
| H | -1.205475000 | 1.620944000  | -0.932018000 |
| H | -1.141986000 | 1.295309000  | 1.536367000  |
| H | -0.662665000 | -0.033725000 | -1.194632000 |
| H | -0.705718000 | -0.403387000 | 1.317652000  |
| H | 3.408076000  | 1.568827000  | 0.473990000  |
| H | 4.710308000  | -2.323073000 | -0.753968000 |
| H | 2.388744000  | -3.165447000 | -0.516231000 |
| H | 0.601834000  | -1.655760000 | 0.210706000  |
| O | -2.868092000 | -1.177041000 | -0.250039000 |
| C | -3.836192000 | 0.971353000  | -0.112368000 |
| C | -4.954013000 | -0.098583000 | -0.034571000 |
| C | -4.167754000 | -1.346967000 | 0.351728000  |
| C | -2.651833000 | 0.155406000  | -0.503027000 |
| H | 6.719274000  | 1.657456000  | -0.146269000 |

**8B•**

|   |              |              |              |
|---|--------------|--------------|--------------|
| O | -3.996276000 | -1.414818000 | 1.727795000  |
| O | -4.083773000 | 1.965523000  | -1.085438000 |
| C | -1.207860000 | 0.625394000  | -0.524476000 |
| C | -0.572672000 | 0.616879000  | 0.901019000  |
| C | 0.869709000  | 1.064549000  | 0.851350000  |
| C | 4.257750000  | -0.284045000 | -0.154003000 |
| C | 2.655367000  | -2.099093000 | -0.269300000 |
| O | 1.153843000  | 2.222726000  | 1.124474000  |
| H | -5.380924000 | 0.520301000  | -1.792359000 |
| O | 5.882246000  | 1.453733000  | -0.064533000 |
| O | -5.500304000 | -0.312959000 | -1.310106000 |
| C | 1.921182000  | 0.100603000  | 0.410799000  |
| O | 6.550543000  | -0.592151000 | -0.703884000 |
| C | 3.233992000  | 0.560795000  | 0.257298000  |
| C | 3.952898000  | -1.622389000 | -0.415442000 |
| H | -4.518316000 | -2.288300000 | -0.082798000 |
| H | -3.677486000 | 1.432080000  | 0.874388000  |
| H | -5.665648000 | 0.092869000  | 0.718953000  |
| H | -4.576153000 | 2.679127000  | -0.660127000 |
| H | -3.496306000 | -2.202959000 | 1.974655000  |
| C | 5.691088000  | 0.239906000  | -0.321662000 |
| C | 1.640101000  | -1.244394000 | 0.141268000  |
| H | -1.175032000 | 1.639914000  | -0.924888000 |
| H | -1.111804000 | 1.315081000  | 1.540192000  |
| H | -0.615037000 | -0.009016000 | -1.187553000 |
| H | -0.671444000 | -0.382625000 | 1.323755000  |

|   |              |              |              |
|---|--------------|--------------|--------------|
| H | 3.459615000  | 1.597281000  | 0.461165000  |
| H | 4.750281000  | -2.279254000 | -0.735507000 |
| H | 2.432135000  | -3.138406000 | -0.475124000 |
| H | 0.637687000  | -1.633766000 | 0.248381000  |
| O | -2.813140000 | -1.178679000 | -0.266843000 |
| C | -3.802629000 | 0.958557000  | -0.108070000 |
| C | -4.909239000 | -0.123533000 | -0.038286000 |
| C | -4.109370000 | -1.367464000 | 0.334082000  |
| C | -2.609765000 | 0.159344000  | -0.507051000 |

**9•**

|   |              |              |              |
|---|--------------|--------------|--------------|
| H | 0.885393000  | -1.838141000 | -0.711685000 |
| C | 3.413407000  | -0.369546000 | 0.922298000  |
| H | 2.810755000  | -0.153906000 | 1.804319000  |
| H | 4.328025000  | -0.881173000 | 1.210652000  |
| H | 3.675649000  | 0.582286000  | 0.459265000  |
| C | 2.680433000  | -1.246778000 | -0.055948000 |
| H | -1.109865000 | -0.211890000 | 1.773339000  |
| H | 1.796643000  | 2.842151000  | -0.168553000 |
| H | -0.932922000 | -1.689465000 | 0.829355000  |
| O | 3.238203000  | -2.123945000 | -0.701878000 |
| C | 0.802395000  | 1.270456000  | 0.532870000  |
| C | 0.463294000  | -0.148946000 | 0.370007000  |
| N | 1.314931000  | -1.075793000 | -0.198988000 |
| C | -0.904986000 | -0.600228000 | 0.772278000  |
| O | 0.351126000  | 1.903006000  | 1.500047000  |
| N | 1.593252000  | 1.879379000  | -0.391051000 |
| C | -1.987044000 | -0.093364000 | -0.192203000 |
| H | -1.966389000 | 0.996574000  | -0.238091000 |
| H | -1.814977000 | -0.483621000 | -1.197017000 |
| S | -3.638574000 | -0.625592000 | 0.373070000  |
| C | -4.648850000 | 0.114110000  | -0.941824000 |
| H | -5.688256000 | -0.129039000 | -0.725616000 |
| H | -4.530505000 | 1.197534000  | -0.955811000 |
| H | -4.380127000 | -0.298712000 | -1.914138000 |
| C | 1.882647000  | 1.440639000  | -1.749684000 |
| H | 2.808828000  | 0.865140000  | -1.814431000 |
| H | 1.068749000  | 0.834277000  | -2.142972000 |
| H | 1.986486000  | 2.321791000  | -2.379588000 |

**10A•**

|   |              |              |              |
|---|--------------|--------------|--------------|
| C | -2.241781000 | 1.035990000  | -0.367243000 |
| C | -2.807311000 | -0.078123000 | 0.492469000  |
| O | -2.273262000 | -0.149796000 | 1.722531000  |
| C | -1.309475000 | 0.359698000  | -1.451465000 |
| C | -0.153832000 | -0.403284000 | -0.895191000 |

|   |              |              |              |
|---|--------------|--------------|--------------|
| C | -0.106571000 | -1.757174000 | -0.681234000 |
| C | 1.105421000  | 0.120491000  | -0.439490000 |
| N | 1.098845000  | -2.105687000 | -0.118153000 |
| C | 1.866824000  | -0.978132000 | 0.040252000  |
| C | 1.669758000  | 1.403206000  | -0.400078000 |
| C | 3.153947000  | -0.823766000 | 0.554729000  |
| C | 2.948480000  | 1.560356000  | 0.108851000  |
| C | 3.682700000  | 0.457295000  | 0.583407000  |
| O | -3.639872000 | -0.863911000 | 0.100237000  |
| H | -0.963884000 | 1.160437000  | -2.107694000 |
| H | -1.940265000 | -0.301344000 | -2.048077000 |
| H | -0.851993000 | -2.507246000 | -0.890032000 |
| H | 1.111475000  | 2.258015000  | -0.759942000 |
| H | 3.394183000  | 2.546580000  | 0.144397000  |
| H | 3.717875000  | -1.673958000 | 0.917218000  |
| H | 4.679467000  | 0.612184000  | 0.976837000  |
| H | -3.092457000 | 1.426308000  | -0.932321000 |
| H | 1.380054000  | -3.042616000 | 0.113762000  |
| C | -1.581762000 | 2.140371000  | 0.369804000  |
| H | -1.011904000 | 1.955761000  | 1.266831000  |
| H | -1.507401000 | 3.110306000  | -0.101489000 |
| H | -2.660393000 | -0.916536000 | 2.176570000  |

**10B•**

|   |              |              |              |
|---|--------------|--------------|--------------|
| C | -2.251771000 | 1.023761000  | -0.316986000 |
| C | -2.906398000 | -0.094236000 | 0.546449000  |
| O | -2.587809000 | -0.181008000 | 1.756920000  |
| C | -1.313239000 | 0.356231000  | -1.385989000 |
| C | -0.157633000 | -0.409445000 | -0.827489000 |
| C | -0.116266000 | -1.755850000 | -0.575925000 |
| C | 1.118062000  | 0.111548000  | -0.415580000 |
| N | 1.101218000  | -2.103203000 | -0.029844000 |
| C | 1.882791000  | -0.980145000 | 0.077356000  |
| C | 1.694088000  | 1.389661000  | -0.423975000 |
| C | 3.183792000  | -0.822068000 | 0.555230000  |
| C | 2.986680000  | 1.550662000  | 0.048504000  |
| C | 3.724163000  | 0.454754000  | 0.535042000  |
| O | -3.712057000 | -0.841533000 | -0.067013000 |
| H | -0.946745000 | 1.142913000  | -2.051383000 |
| H | -1.939634000 | -0.308977000 | -1.982347000 |
| H | -0.875368000 | -2.502989000 | -0.739898000 |
| H | 1.131061000  | 2.238549000  | -0.790326000 |
| H | 3.440456000  | 2.534033000  | 0.046686000  |
| H | 3.750090000  | -1.666623000 | 0.927664000  |
| H | 4.731778000  | 0.611559000  | 0.899355000  |
| H | -3.060510000 | 1.468590000  | -0.909850000 |

|   |              |              |              |
|---|--------------|--------------|--------------|
| H | 1.378519000  | -3.035674000 | 0.222800000  |
| C | -1.577054000 | 2.090817000  | 0.457031000  |
| H | -1.163802000 | 1.882517000  | 1.432598000  |
| H | -1.358731000 | 3.044713000  | -0.007656000 |

### 11A•

|   |              |              |              |
|---|--------------|--------------|--------------|
| C | -2.471066000 | 0.806707000  | 0.591426000  |
| C | -3.073656000 | 0.218294000  | -0.677192000 |
| O | -3.111754000 | -1.128076000 | -0.678813000 |
| C | -0.994719000 | 1.043599000  | 0.375702000  |
| C | 0.001666000  | 0.072114000  | 0.234779000  |
| C | -0.096396000 | -1.328776000 | 0.211945000  |
| C | 1.427588000  | 0.352725000  | 0.074700000  |
| N | 1.146941000  | -1.880779000 | 0.057279000  |
| C | 2.097621000  | -0.886294000 | -0.029916000 |
| C | 2.170957000  | 1.532490000  | 0.016486000  |
| C | 3.477899000  | -0.976229000 | -0.190494000 |
| C | 3.547937000  | 1.454405000  | -0.145095000 |
| C | 4.193260000  | 0.211787000  | -0.247262000 |
| O | -3.459100000 | 0.874899000  | -1.617857000 |
| H | -0.687090000 | 2.078603000  | 0.310539000  |
| H | -0.968259000 | -1.954212000 | 0.268005000  |
| H | 1.684668000  | 2.496832000  | 0.095870000  |
| H | 4.134747000  | 2.362858000  | -0.192756000 |
| H | 3.972208000  | -1.936173000 | -0.268103000 |
| H | 5.268146000  | 0.178845000  | -0.372304000 |
| H | -2.939999000 | 1.787429000  | 0.673902000  |
| H | 1.332985000  | -2.867681000 | 0.004228000  |
| C | -2.804041000 | 0.003889000  | 1.859186000  |
| H | -2.348545000 | -0.983635000 | 1.845939000  |
| H | -2.429067000 | 0.540618000  | 2.730987000  |
| H | -3.883200000 | -0.118273000 | 1.966777000  |
| H | -3.460653000 | -1.422608000 | -1.536276000 |

### 11B•

|   |              |              |              |
|---|--------------|--------------|--------------|
| C | 2.502868000  | -0.856282000 | 0.462524000  |
| C | 3.087089000  | -0.000369000 | -0.712897000 |
| O | 3.299760000  | 1.219480000  | -0.505935000 |
| C | 1.034221000  | -1.110108000 | 0.261282000  |
| C | 0.038649000  | -0.126632000 | 0.186799000  |
| C | 0.176981000  | 1.268683000  | 0.219091000  |
| C | -1.396314000 | -0.362258000 | 0.049636000  |
| N | -1.058235000 | 1.863408000  | 0.116433000  |
| C | -2.035561000 | 0.899596000  | 0.011403000  |
| C | -2.174651000 | -1.517460000 | -0.041957000 |
| C | -3.416982000 | 1.029992000  | -0.113702000 |

|   |              |              |              |
|---|--------------|--------------|--------------|
| C | -3.552644000 | -1.397842000 | -0.170101000 |
| C | -4.166180000 | -0.135179000 | -0.204822000 |
| O | 3.283534000  | -0.618890000 | -1.789920000 |
| H | 0.712774000  | -2.140654000 | 0.168001000  |
| H | 1.081081000  | 1.849662000  | 0.270228000  |
| H | -1.711756000 | -2.496417000 | -0.014672000 |
| H | -4.164572000 | -2.288007000 | -0.243983000 |
| H | -3.887240000 | 2.004942000  | -0.139870000 |
| H | -5.242312000 | -0.068341000 | -0.304592000 |
| H | 3.006195000  | -1.822981000 | 0.390067000  |
| H | -1.219872000 | 2.855540000  | 0.107513000  |
| C | 2.815483000  | -0.260148000 | 1.843737000  |
| H | 2.337327000  | 0.710074000  | 1.968153000  |
| H | 2.460330000  | -0.923483000 | 2.636422000  |
| H | 3.891583000  | -0.120859000 | 1.968572000  |

### 12A•

|   |              |              |              |
|---|--------------|--------------|--------------|
| O | 0.406643000  | -2.211876000 | 0.562481000  |
| N | 2.396093000  | -1.218459000 | 0.180065000  |
| C | 0.347156000  | -0.018392000 | -0.464702000 |
| C | -2.145291000 | -0.323748000 | 1.257082000  |
| H | 0.242444000  | 3.365194000  | 1.080697000  |
| C | -2.128445000 | -0.609525000 | -0.224584000 |
| N | -1.000467000 | -0.336480000 | -0.935979000 |
| H | -2.127932000 | 0.753716000  | 1.427651000  |
| C | 1.050896000  | -1.259252000 | 0.136965000  |
| H | -1.068918000 | -0.600653000 | -1.908345000 |
| H | 0.887723000  | 0.250568000  | -1.378682000 |
| H | 2.827302000  | -2.044260000 | 0.568398000  |
| H | -3.062116000 | -0.735756000 | 1.671336000  |
| H | 0.686974000  | 0.984632000  | 1.528619000  |
| O | -3.125817000 | -1.036820000 | -0.804751000 |
| H | -1.284961000 | -0.762269000 | 1.757327000  |
| C | 0.432669000  | 1.130023000  | 0.490734000  |
| C | 3.273976000  | -0.201330000 | -0.385826000 |
| H | 3.276374000  | -0.229689000 | -1.477798000 |
| H | 2.982584000  | 0.795501000  | -0.056750000 |
| H | 4.284764000  | -0.393282000 | -0.034877000 |
| S | -0.040375000 | 2.698987000  | -0.050377000 |

### 12B•

|   |              |              |              |
|---|--------------|--------------|--------------|
| O | 0.402048000  | -1.892565000 | 0.631169000  |
| N | 2.395363000  | -0.941794000 | 0.172494000  |
| C | 0.345848000  | 0.273583000  | -0.447201000 |
| C | -2.188544000 | -0.010282000 | 1.228672000  |
| H | 0.050745000  | 3.293471000  | 0.670478000  |

|   |              |              |              |
|---|--------------|--------------|--------------|
| C | -2.141814000 | -0.309080000 | -0.250497000 |
| N | -0.996803000 | -0.056527000 | -0.936757000 |
| H | -2.157870000 | 1.068143000  | 1.392516000  |
| C | 1.049159000  | -0.960240000 | 0.165247000  |
| H | -1.050368000 | -0.314325000 | -1.911872000 |
| H | 0.890268000  | 0.560310000  | -1.352712000 |
| H | 2.823028000  | -1.764812000 | 0.570592000  |
| H | -3.122241000 | -0.402030000 | 1.624439000  |
| H | 0.471365000  | 1.303965000  | 1.569932000  |
| O | -3.132462000 | -0.732365000 | -0.846981000 |
| H | -1.348011000 | -0.461019000 | 1.751422000  |
| O | 0.044868000  | 2.619112000  | -0.020494000 |
| C | 0.425713000  | 1.418791000  | 0.496715000  |
| C | 3.274784000  | 0.056945000  | -0.422051000 |
| H | 3.252962000  | 0.018606000  | -1.513465000 |
| H | 3.003335000  | 1.060283000  | -0.094795000 |
| H | 4.290369000  | -0.146099000 | -0.091561000 |

### 13A•

|   |              |              |              |
|---|--------------|--------------|--------------|
| H | 0.040191000  | 0.482349000  | -1.628045000 |
| H | -6.097338000 | -0.695262000 | -0.623111000 |
| H | -5.830071000 | -0.718310000 | 1.086814000  |
| C | 2.740592000  | -2.027508000 | -0.034822000 |
| O | 2.390849000  | 2.790018000  | 0.669064000  |
| O | -0.349303000 | 2.652320000  | -0.243248000 |
| C | 2.008396000  | -0.789179000 | -0.532537000 |
| O | -1.306891000 | -0.072846000 | 1.930615000  |
| H | -1.812908000 | 0.058712000  | -2.409438000 |
| H | -4.247788000 | -0.361070000 | -2.225653000 |
| C | -2.047397000 | -0.124528000 | 0.953394000  |
| N | -1.497860000 | 0.044089000  | -0.353078000 |
| O | 3.951564000  | -2.105089000 | -0.081515000 |
| O | 1.952974000  | -2.993041000 | 0.413708000  |
| C | -0.084972000 | 0.311004000  | -0.553254000 |
| O | 4.011690000  | 0.616678000  | -0.210859000 |
| C | 0.435863000  | 1.547824000  | 0.179979000  |
| C | 1.905311000  | 1.745144000  | -0.173675000 |
| C | -4.150819000 | -0.416291000 | -0.024859000 |
| C | 2.673190000  | 0.471705000  | -0.024268000 |
| O | 0.644448000  | -0.843598000 | -0.165229000 |
| N | -5.464218000 | -0.626965000 | 0.153949000  |
| N | -3.383427000 | -0.337794000 | 1.051893000  |
| C | -2.299540000 | -0.058025000 | -1.451723000 |
| C | -3.624286000 | -0.286328000 | -1.348502000 |
| H | 2.100673000  | -0.835293000 | -1.636797000 |
| H | 1.959433000  | 2.079135000  | -1.225276000 |

|   |             |              |              |
|---|-------------|--------------|--------------|
| H | 0.349138000 | 1.389483000  | 1.254211000  |
| H | 4.418457000 | -0.271746000 | -0.216074000 |
| H | 0.044190000 | 3.450074000  | 0.132700000  |
| H | 3.288203000 | 3.013387000  | 0.393640000  |
| H | 2.505679000 | -3.745223000 | 0.688984000  |

**13B•**

|   |              |              |              |
|---|--------------|--------------|--------------|
| H | -0.099375000 | -1.234840000 | 1.395270000  |
| H | -5.559387000 | 1.853794000  | -0.504526000 |
| H | -5.991827000 | 0.249170000  | -0.020701000 |
| C | 2.217221000  | 1.875876000  | -0.241899000 |
| O | 2.864862000  | -1.826643000 | -1.377652000 |
| O | -0.023350000 | -2.150430000 | -1.162776000 |
| C | 2.019665000  | 0.849273000  | 0.886095000  |
| O | -2.100052000 | -2.206773000 | 0.698773000  |
| H | -0.842386000 | 1.833457000  | -0.287475000 |
| H | -3.199807000 | 2.556496000  | -0.709583000 |
| C | -2.426340000 | -1.033778000 | 0.452600000  |
| N | -1.405165000 | -0.069779000 | 0.311700000  |
| O | 3.453629000  | 2.388528000  | -0.180548000 |
| O | 1.401143000  | 2.160045000  | -1.082046000 |
| C | -0.023822000 | -0.470590000 | 0.619654000  |
| O | 3.970576000  | -0.674777000 | 1.068841000  |
| C | 0.683771000  | -1.057909000 | -0.604597000 |
| C | 2.096771000  | -1.492502000 | -0.212148000 |
| C | -3.987118000 | 0.601561000  | -0.082221000 |
| C | 2.745500000  | -0.410459000 | 0.555338000  |
| O | 0.629675000  | 0.673025000  | 1.140469000  |
| N | -5.280074000 | 0.934340000  | -0.211324000 |
| N | -3.705175000 | -0.640212000 | 0.301753000  |
| C | -1.689858000 | 1.182671000  | -0.135075000 |
| C | -2.967697000 | 1.562691000  | -0.359369000 |
| H | 2.446159000  | 1.287000000  | 1.793055000  |
| H | 2.013291000  | -2.388559000 | 0.422812000  |
| H | 0.757049000  | -0.280594000 | -1.370103000 |
| H | 4.296553000  | 0.061976000  | 1.603461000  |
| H | -0.670790000 | -2.475700000 | -0.507533000 |
| H | 2.412604000  | -2.565687000 | -1.807611000 |
| H | 3.590402000  | 2.988243000  | -0.932719000 |

**13C•**

|   |              |              |              |
|---|--------------|--------------|--------------|
| H | 0.055232000  | 0.393219000  | -1.623060000 |
| H | -6.097477000 | -0.713333000 | -0.618656000 |
| H | -5.841185000 | -0.684531000 | 1.092830000  |
| C | 2.773625000  | -2.104067000 | 0.009632000  |
| O | 2.401153000  | 2.791300000  | 0.591024000  |

|   |              |              |              |
|---|--------------|--------------|--------------|
| O | -0.343841000 | 2.613953000  | -0.337259000 |
| C | 2.022455000  | -0.835856000 | -0.484935000 |
| O | -1.322857000 | -0.026065000 | 1.948498000  |
| H | -1.794255000 | -0.036442000 | -2.395400000 |
| H | -4.234251000 | -0.433346000 | -2.218508000 |
| C | -2.053191000 | -0.109501000 | 0.965224000  |
| N | -1.493790000 | 0.010384000  | -0.340063000 |
| O | 4.038596000  | -2.012760000 | -0.099464000 |
| O | 2.129493000  | -3.073360000 | 0.422501000  |
| C | -0.070467000 | 0.256142000  | -0.541855000 |
| O | 4.011370000  | 0.533269000  | -0.112759000 |
| C | 0.441925000  | 1.527390000  | 0.140532000  |
| C | 1.914468000  | 1.705665000  | -0.205418000 |
| C | -4.152834000 | -0.422441000 | -0.016986000 |
| C | 2.663238000  | 0.434283000  | 0.008737000  |
| O | 0.645143000  | -0.882111000 | -0.115795000 |
| N | -5.469478000 | -0.622103000 | 0.160043000  |
| N | -3.392399000 | -0.313664000 | 1.061803000  |
| C | -2.288536000 | -0.119578000 | -1.438051000 |
| C | -3.616962000 | -0.335586000 | -1.339173000 |
| H | 2.089722000  | -0.874388000 | -1.592061000 |
| H | 1.978907000  | 1.996237000  | -1.271644000 |
| H | 0.343595000  | 1.419040000  | 1.219852000  |
| H | 4.314224000  | -0.432195000 | -0.140276000 |
| H | 0.054126000  | 3.427761000  | -0.003576000 |
| H | 3.346244000  | 2.883150000  | 0.417818000  |

### 13D•

|   |              |              |              |
|---|--------------|--------------|--------------|
| H | -0.143173000 | -1.273070000 | 1.482633000  |
| H | -5.459229000 | 1.903024000  | -0.659919000 |
| H | -5.942688000 | 0.307891000  | -0.193480000 |
| C | 2.199997000  | 1.953635000  | -0.198433000 |
| O | 2.901062000  | -1.953601000 | -1.188840000 |
| O | 0.061152000  | -2.269203000 | -0.996388000 |
| C | 1.997877000  | 0.879718000  | 0.925306000  |
| O | -2.135285000 | -2.225553000 | 0.687457000  |
| H | -0.741195000 | 1.778361000  | -0.253949000 |
| H | -3.078884000 | 2.555140000  | -0.773031000 |
| C | -2.423676000 | -1.043965000 | 0.423870000  |
| N | -1.380928000 | -0.104558000 | 0.321604000  |
| O | 3.417241000  | 2.267588000  | -0.344473000 |
| O | 1.221260000  | 2.379234000  | -0.833174000 |
| C | -0.010994000 | -0.515968000 | 0.705950000  |
| O | 4.138938000  | -0.152640000 | 0.462848000  |
| C | 0.735907000  | -1.135969000 | -0.472301000 |
| C | 2.154380000  | -1.524682000 | -0.045268000 |



|   |              |              |              |
|---|--------------|--------------|--------------|
| C | -3.928797000 | 0.620187000  | -0.175452000 |
| C | 2.799227000  | -0.344615000 | 0.602243000  |
| O | 0.631606000  | 0.609086000  | 1.247335000  |
| N | -5.210546000 | 0.978211000  | -0.356673000 |
| N | -3.688693000 | -0.626967000 | 0.221108000  |
| C | -1.618335000 | 1.153199000  | -0.134182000 |
| C | -2.880342000 | 1.557759000  | -0.411732000 |
| H | 2.413108000  | 1.335870000  | 1.830151000  |
| H | 2.069911000  | -2.374075000 | 0.653139000  |
| H | 0.816589000  | -0.386660000 | -1.266848000 |
| H | 4.234131000  | 0.810352000  | 0.231948000  |
| H | -0.660119000 | -2.520198000 | -0.385054000 |
| H | 2.413470000  | -2.698501000 | -1.565992000 |

#### 14A•

|   |              |              |              |
|---|--------------|--------------|--------------|
| O | -2.280243000 | 1.325777000  | -0.065099000 |
| C | -0.505315000 | -0.196069000 | 0.524822000  |
| N | -1.540140000 | -1.191924000 | 0.763636000  |
| C | -1.085949000 | 1.155357000  | -0.060245000 |
| H | -2.282607000 | -0.733590000 | 1.279325000  |
| H | -0.111527000 | 0.125047000  | 1.496210000  |
| H | 0.422447000  | -1.330410000 | -1.150120000 |
| C | 0.619708000  | -0.703918000 | -0.293120000 |
| C | 2.011557000  | -0.405560000 | -0.071791000 |
| O | 2.916154000  | -0.823543000 | -0.779799000 |
| O | 2.248796000  | 0.382495000  | 1.006556000  |
| H | 3.206241000  | 0.524121000  | 1.069943000  |
| C | -0.106806000 | 2.191115000  | -0.527718000 |
| H | 0.718856000  | 2.286509000  | 0.178083000  |
| H | 0.320778000  | 1.860701000  | -1.478857000 |
| H | -0.606022000 | 3.147064000  | -0.669487000 |
| C | -2.120083000 | -1.812132000 | -0.431361000 |
| H | -3.026763000 | -2.339701000 | -0.137296000 |
| H | -2.382361000 | -1.096637000 | -1.220532000 |
| H | -1.434378000 | -2.550230000 | -0.849507000 |

#### 14B•

|   |              |              |              |
|---|--------------|--------------|--------------|
| 8 | -2.313024000 | 1.252901000  | -0.097487000 |
| 6 | -0.468830000 | -0.181296000 | 0.504232000  |
| 7 | -1.450788000 | -1.235606000 | 0.759265000  |
| 6 | -1.107529000 | 1.124310000  | -0.048498000 |
| 1 | -2.221507000 | -0.811043000 | 1.263504000  |
| 1 | -0.051007000 | 0.142296000  | 1.466750000  |
| 1 | 0.508468000  | -1.136609000 | -1.254222000 |
| 6 | 0.690152000  | -0.615348000 | -0.323253000 |
| 6 | 2.097540000  | -0.298147000 | 0.023458000  |

|   |              |              |              |
|---|--------------|--------------|--------------|
| 8 | 2.979502000  | -0.752733000 | -0.761157000 |
| 8 | 2.307976000  | 0.392886000  | 1.062028000  |
| 6 | -0.163986000 | 2.219473000  | -0.463092000 |
| 1 | 0.711795000  | 2.238281000  | 0.186224000  |
| 1 | 0.193567000  | 1.998487000  | -1.473223000 |
| 1 | -0.676476000 | 3.179854000  | -0.470788000 |
| 6 | -1.993809000 | -1.891268000 | -0.433272000 |
| 1 | -2.854924000 | -2.491229000 | -0.137493000 |
| 1 | -2.317383000 | -1.193944000 | -1.216852000 |
| 1 | -1.253887000 | -2.567628000 | -0.863274000 |

**15•**

|    |              |              |              |
|----|--------------|--------------|--------------|
| 15 | -5.144355000 | -0.460845000 | -0.769229000 |
| 8  | -5.639393000 | -1.331732000 | -1.975660000 |
| 8  | -6.215338000 | -0.522802000 | 0.381335000  |
| 8  | -4.740960000 | 0.882207000  | -1.217694000 |
| 8  | -3.962768000 | -1.329360000 | -0.140271000 |
| 15 | -2.849636000 | -1.104340000 | 1.004173000  |
| 8  | -3.626463000 | -0.587817000 | 2.270963000  |
| 8  | -2.026084000 | -2.298100000 | 1.144921000  |
| 8  | -2.138558000 | 0.247203000  | 0.593963000  |
| 15 | -1.343087000 | 0.734900000  | -0.747859000 |
| 8  | -2.307677000 | 1.813773000  | -1.335648000 |
| 8  | -0.932624000 | -0.385009000 | -1.594486000 |
| 8  | -0.136835000 | 1.544522000  | -0.167190000 |
| 6  | -0.283836000 | 2.669546000  | 0.734364000  |
| 6  | 1.111140000  | 3.076386000  | 1.185748000  |
| 8  | 1.730057000  | 1.997253000  | 1.908022000  |
| 6  | 2.062975000  | 3.364805000  | 0.072054000  |
| 8  | 1.662202000  | 4.210128000  | -0.907861000 |
| 6  | 2.900819000  | 2.167771000  | -0.182392000 |
| 8  | 4.222021000  | 2.487832000  | -0.581857000 |
| 6  | 2.819302000  | 1.461224000  | 1.189993000  |
| 7  | 2.642585000  | 0.015904000  | 1.052775000  |
| 6  | 1.671788000  | -0.794835000 | 1.603977000  |
| 7  | 1.836906000  | -2.055955000 | 1.300024000  |
| 6  | 2.969741000  | -2.085361000 | 0.511503000  |
| 6  | 3.640279000  | -3.172007000 | -0.125373000 |
| 8  | 3.372615000  | -4.367539000 | -0.121110000 |
| 7  | 4.768685000  | -2.708809000 | -0.845851000 |
| 6  | 5.188894000  | -1.410195000 | -0.951703000 |
| 7  | 6.264060000  | -1.163530000 | -1.729829000 |
| 7  | 4.564772000  | -0.412889000 | -0.358081000 |
| 6  | 3.480180000  | -0.803610000 | 0.349475000  |
| 1  | -0.881329000 | 2.367756000  | 1.594800000  |
| 1  | -0.768420000 | 3.493779000  | 0.211251000  |

|   |              |              |              |
|---|--------------|--------------|--------------|
| 1 | 0.992522000  | 3.922712000  | 1.870782000  |
| 1 | 2.318318000  | 4.218043000  | -1.618834000 |
| 1 | 2.426702000  | 1.531974000  | -0.945862000 |
| 1 | 4.659776000  | 1.627830000  | -0.727311000 |
| 1 | 3.747552000  | 1.636630000  | 1.740009000  |
| 1 | 0.879847000  | -0.382111000 | 2.204034000  |
| 1 | 6.876017000  | -1.909339000 | -2.014533000 |
| 1 | 6.665464000  | -0.241843000 | -1.684469000 |
| 1 | 5.281477000  | -3.433501000 | -1.330221000 |
| 1 | -3.266445000 | 1.523107000  | -1.366555000 |
| 1 | -3.896594000 | -1.288175000 | 2.882496000  |
| 1 | -6.931850000 | 0.125087000  | 0.313416000  |
| 1 | -6.035170000 | -2.187555000 | -1.753856000 |

**16•**

|   |              |              |              |
|---|--------------|--------------|--------------|
| 6 | -1.277187000 | -0.794845000 | 0.577512000  |
| 6 | -1.405371000 | 0.732384000  | 0.638362000  |
| 6 | -0.359560000 | 1.375687000  | -0.274381000 |
| 6 | 1.027599000  | 0.873385000  | 0.073995000  |
| 6 | 1.060043000  | -0.667655000 | 0.047718000  |
| 8 | 0.045360000  | -1.200495000 | 0.900994000  |
| 7 | -2.719629000 | 1.264801000  | 0.296818000  |
| 8 | -0.373087000 | 2.792093000  | -0.135961000 |
| 8 | 1.998814000  | 1.313751000  | -0.885022000 |
| 6 | 2.353056000  | -1.248663000 | 0.514737000  |
| 8 | 3.534327000  | -0.735467000 | 0.063842000  |
| 8 | -1.668356000 | -1.211980000 | -0.701350000 |
| 6 | -1.788117000 | -2.626086000 | -0.845951000 |
| 1 | -1.900188000 | -1.269334000 | 1.343754000  |
| 1 | -1.178118000 | 1.028121000  | 1.665076000  |
| 1 | -0.573229000 | 1.099386000  | -1.314769000 |
| 1 | 1.298192000  | 1.225963000  | 1.075488000  |
| 1 | 0.862439000  | -0.962539000 | -0.994523000 |
| 1 | -3.386728000 | 1.098481000  | 1.040525000  |
| 1 | -3.072674000 | 0.807165000  | -0.537175000 |
| 1 | -1.309912000 | 3.041228000  | -0.107847000 |
| 1 | 2.062730000  | 2.275738000  | -0.839062000 |
| 1 | 2.408681000  | -1.812240000 | 1.435238000  |
| 1 | 3.343523000  | 0.045975000  | -0.488731000 |
| 1 | -2.141009000 | -2.810367000 | -1.858402000 |
| 1 | -0.824765000 | -3.120015000 | -0.700294000 |
| 1 | -2.510779000 | -3.029632000 | -0.128993000 |

**17A•**

|   |              |              |              |
|---|--------------|--------------|--------------|
| 8 | -3.119094000 | -1.011157000 | -0.484061000 |
| 8 | -0.945842000 | -0.224246000 | 0.345483000  |

|    |              |              |              |
|----|--------------|--------------|--------------|
| 1  | 3.093615000  | 0.426443000  | -0.883942000 |
| 8  | -2.953021000 | 0.265450000  | 1.790108000  |
| 6  | 1.360273000  | 1.404359000  | -0.084931000 |
| 8  | 2.818315000  | -1.964094000 | 0.519858000  |
| 1  | 3.892613000  | -0.079223000 | 1.480681000  |
| 1  | 0.833402000  | 1.448460000  | 0.871441000  |
| 6  | 0.852433000  | -1.369082000 | -0.777404000 |
| 1  | -0.017052000 | -3.092675000 | -1.135702000 |
| 1  | 3.977334000  | 1.464632000  | 0.989209000  |
| 6  | 1.828053000  | 2.785935000  | -0.486662000 |
| 1  | -2.571333000 | 2.254445000  | -0.056574000 |
| 8  | -2.716208000 | 1.415458000  | -0.515293000 |
| 1  | 2.357992000  | -2.815408000 | 0.454565000  |
| 6  | -0.184318000 | -0.243413000 | -0.884764000 |
| 1  | -4.074043000 | -0.933895000 | -0.615783000 |
| 15 | -2.481687000 | 0.137647000  | 0.407022000  |
| 8  | 0.293881000  | -2.610918000 | -0.360485000 |
| 8  | 0.426273000  | 0.981720000  | -1.107732000 |
| 1  | 2.357040000  | 2.749391000  | -1.440988000 |
| 6  | 2.506183000  | 0.386845000  | 0.054667000  |
| 1  | 1.278438000  | -1.480200000 | -1.788692000 |
| 1  | -0.859877000 | -0.418360000 | -1.721610000 |
| 1  | 2.496268000  | 3.196455000  | 0.270464000  |
| 6  | 1.929858000  | -0.983866000 | 0.177748000  |
| 7  | 3.328218000  | 0.722356000  | 1.223063000  |
| 1  | 0.974052000  | 3.456374000  | -0.584785000 |

**17B•**

|    |              |              |              |
|----|--------------|--------------|--------------|
| 8  | 2.679461000  | 1.260685000  | 0.177504000  |
| 8  | 0.895388000  | -0.547690000 | 0.251781000  |
| 1  | -3.167857000 | 0.166061000  | -0.782295000 |
| 8  | 2.895245000  | -0.831167000 | 1.715683000  |
| 6  | -1.808651000 | -1.287793000 | 0.024447000  |
| 8  | -1.979726000 | 2.412852000  | 0.405235000  |
| 1  | -3.589464000 | 1.074154000  | 1.556035000  |
| 1  | -1.279189000 | -1.447237000 | 0.967029000  |
| 6  | -0.477395000 | 1.085122000  | -0.967156000 |
| 1  | 1.252802000  | 1.896967000  | -0.410320000 |
| 1  | -4.220207000 | -0.379187000 | 1.208150000  |
| 6  | -2.742942000 | -2.447207000 | -0.250039000 |
| 1  | 3.243526000  | -1.911639000 | -0.674442000 |
| 8  | 3.163987000  | -0.962744000 | -0.834456000 |
| 1  | -1.253956000 | 3.024037000  | 0.193461000  |
| 6  | 0.162213000  | -0.312082000 | -0.946166000 |
| 15 | 2.479817000  | -0.205595000 | 0.433639000  |
| 8  | 0.426523000  | 2.173054000  | -0.888798000 |

|   |              |              |              |
|---|--------------|--------------|--------------|
| 8 | -0.846611000 | -1.279711000 | -1.053812000 |
| 1 | -3.277580000 | -2.294738000 | -1.189937000 |
| 6 | -2.537421000 | 0.067267000  | 0.124775000  |
| 1 | -0.967322000 | 1.163067000  | -1.953258000 |
| 1 | 0.814536000  | -0.450057000 | -1.810646000 |
| 1 | -3.471529000 | -2.550005000 | 0.554749000  |
| 6 | -1.522582000 | 1.158643000  | 0.100279000  |
| 7 | -3.345170000 | 0.112025000  | 1.350226000  |
| 1 | -2.178286000 | -3.377605000 | -0.316627000 |

**17C•**

|    |              |              |              |
|----|--------------|--------------|--------------|
| 8  | 2.603276000  | 1.238255000  | 0.393596000  |
| 8  | 0.898516000  | -0.634796000 | 0.240273000  |
| 1  | -3.143471000 | 0.236796000  | -0.786456000 |
| 8  | 2.940844000  | -0.966169000 | 1.648558000  |
| 6  | -1.841885000 | -1.258664000 | 0.038846000  |
| 8  | -1.849836000 | 2.452653000  | 0.368991000  |
| 1  | -3.531165000 | 1.201649000  | 1.530962000  |
| 1  | -1.313423000 | -1.421926000 | 0.982065000  |
| 6  | -0.405255000 | 1.040781000  | -0.975922000 |
| 1  | 1.346488000  | 1.783167000  | -0.338989000 |
| 1  | -4.217309000 | -0.232658000 | 1.211231000  |
| 6  | -2.828881000 | -2.382732000 | -0.203085000 |
| 8  | 3.173730000  | -0.883641000 | -0.913964000 |
| 1  | -1.087447000 | 3.011209000  | 0.134900000  |
| 6  | 0.181044000  | -0.383104000 | -0.930768000 |
| 15 | 2.559489000  | -0.301751000 | 0.345224000  |
| 8  | 0.543888000  | 2.086874000  | -0.891240000 |
| 8  | -0.895685000 | -1.304290000 | -1.042786000 |
| 1  | -3.364081000 | -2.227584000 | -1.142630000 |
| 6  | -2.516107000 | 0.126689000  | 0.122344000  |
| 1  | -0.888317000 | 1.134706000  | -1.965885000 |
| 1  | 0.811922000  | -0.558013000 | -1.806484000 |
| 1  | -3.555786000 | -2.439100000 | 0.608122000  |
| 6  | -1.454907000 | 1.170286000  | 0.081482000  |
| 7  | -3.323777000 | 0.226481000  | 1.346475000  |
| 1  | -2.305226000 | -3.337989000 | -0.255326000 |

**18•**

|   |              |              |              |
|---|--------------|--------------|--------------|
| 1 | -1.909114000 | -0.498177000 | 2.167197000  |
| 6 | 4.477500000  | -1.161884000 | -0.268005000 |
| 6 | 1.433876000  | -0.633345000 | 1.419493000  |
| 6 | -2.058469000 | -0.153534000 | 1.136255000  |
| 6 | 0.621961000  | 1.689104000  | 0.670086000  |
| 7 | 1.547277000  | 0.525201000  | 0.692302000  |
| 7 | 2.432208000  | -1.464803000 | 1.234137000  |

|    |              |              |              |
|----|--------------|--------------|--------------|
| 8  | -2.088678000 | 3.155465000  | -0.577077000 |
| 7  | 3.260865000  | 1.312569000  | -0.856784000 |
| 6  | 2.719958000  | 0.425058000  | -0.012226000 |
| 6  | -1.666554000 | 1.318288000  | 1.050801000  |
| 6  | 3.252964000  | -0.816321000 | 0.333714000  |
| 8  | -5.329537000 | -1.181218000 | -0.542851000 |
| 8  | -3.411327000 | -0.285051000 | 0.769565000  |
| 8  | -3.259550000 | -2.661520000 | -0.179185000 |
| 6  | 4.412162000  | 0.873997000  | -1.359379000 |
| 1  | -1.404207000 | -0.750654000 | 0.491796000  |
| 1  | 4.665937000  | -3.026279000 | 0.551977000  |
| 1  | 0.396201000  | 1.999420000  | -1.565130000 |
| 7  | 5.036796000  | -0.286101000 | -1.121432000 |
| 1  | -2.085331000 | 1.124773000  | -1.066413000 |
| 6  | -0.099598000 | 1.829595000  | -0.622769000 |
| 8  | -0.361285000 | 1.536854000  | 1.657947000  |
| 1  | -2.380503000 | 1.918006000  | 1.615909000  |
| 8  | -3.127976000 | -0.654739000 | -1.752650000 |
| 1  | 1.244204000  | 2.559989000  | 0.905135000  |
| 6  | -1.563275000 | 1.818013000  | -0.397163000 |
| 1  | 4.913850000  | 1.538746000  | -2.054880000 |
| 1  | 0.597029000  | -0.795244000 | 2.076165000  |
| 7  | 5.111252000  | -2.320809000 | -0.008330000 |
| 1  | 5.937361000  | -2.562632000 | -0.528337000 |
| 15 | -3.814040000 | -1.290245000 | -0.544464000 |
| 1  | -3.039940000 | 3.071186000  | -0.716534000 |

## 19•

|    |              |              |              |
|----|--------------|--------------|--------------|
| 1  | -0.291318000 | -1.410052000 | -1.872325000 |
| 6  | -1.423177000 | -1.686514000 | 1.272685000  |
| 1  | -2.075960000 | -0.816808000 | 1.371075000  |
| 1  | -1.924872000 | -2.549720000 | 1.701680000  |
| 1  | -0.497146000 | -1.497523000 | 1.809712000  |
| 6  | -1.171500000 | -1.967345000 | -0.187810000 |
| 1  | 0.565511000  | 1.894831000  | 0.427345000  |
| 1  | 0.807430000  | 0.422508000  | -1.444299000 |
| 1  | 3.640300000  | -0.232073000 | 0.701482000  |
| 1  | -0.348693000 | 0.718415000  | 1.361859000  |
| 8  | -1.696092000 | -2.926712000 | -0.749436000 |
| 6  | 1.759268000  | -0.598936000 | 0.197846000  |
| 6  | 0.498846000  | -0.042726000 | -0.508990000 |
| 7  | -0.403110000 | -1.106642000 | -0.915954000 |
| 16 | -1.668043000 | 1.684387000  | -0.405653000 |
| 6  | -0.129379000 | 1.060709000  | 0.353807000  |
| 8  | 1.730397000  | -1.688410000 | 0.761164000  |
| 7  | 2.872544000  | 0.159622000  | 0.174520000  |

|   |              |             |              |
|---|--------------|-------------|--------------|
| 6 | -1.983641000 | 3.044091000 | 0.576576000  |
| 1 | -1.244705000 | 3.426333000 | 1.264814000  |
| 1 | -2.899652000 | 3.583346000 | 0.389268000  |
| 6 | 3.097065000  | 1.465750000 | -0.428404000 |
| 1 | 2.905117000  | 2.277172000 | 0.277039000  |
| 1 | 4.135504000  | 1.525756000 | -0.748663000 |
| 1 | 2.471803000  | 1.607572000 | -1.306575000 |

**20•**

|   |              |              |              |
|---|--------------|--------------|--------------|
| 7 | 0.343643000  | -0.448699000 | -0.469178000 |
| 1 | 4.250968000  | -2.229817000 | -0.934393000 |
| 1 | -4.118435000 | 2.720093000  | 0.284613000  |
| 8 | 2.729127000  | 2.343597000  | -0.024270000 |
| 1 | 4.276411000  | 1.618153000  | 1.296941000  |
| 6 | 2.022958000  | 1.181070000  | 0.382588000  |
| 6 | -4.926522000 | 0.346092000  | 0.242029000  |
| 6 | 3.557126000  | -0.491687000 | -0.414193000 |
| 7 | -3.559800000 | 0.196455000  | 0.126594000  |
| 1 | 1.314976000  | -2.351589000 | -0.289798000 |
| 8 | -3.794993000 | -2.052756000 | 0.653463000  |
| 7 | -0.774928000 | -2.297218000 | 0.122257000  |
| 8 | 4.090120000  | 0.741092000  | 1.663360000  |
| 1 | 1.258721000  | 1.411063000  | 1.124724000  |
| 6 | -2.732650000 | 1.281420000  | -0.174489000 |
| 1 | 2.131536000  | 3.099519000  | -0.030848000 |
| 1 | 2.578563000  | -0.590296000 | 1.485411000  |
| 6 | -1.638829000 | -1.217040000 | 0.081025000  |
| 6 | -0.956868000 | -0.066089000 | -0.282309000 |
| 6 | 1.445386000  | 0.445855000  | -0.836731000 |
| 6 | -3.033118000 | -1.154094000 | 0.330004000  |
| 7 | -3.319043000 | 2.503467000  | -0.289033000 |
| 1 | 1.063333000  | 1.146455000  | -1.578138000 |
| 6 | 0.389831000  | -1.805308000 | -0.207361000 |
| 8 | 3.769627000  | -1.852501000 | -0.187551000 |
| 1 | 4.459000000  | -0.012901000 | -0.802259000 |
| 8 | 2.511011000  | -0.290839000 | -1.384619000 |
| 1 | -5.401063000 | 1.224540000  | -0.154690000 |
| 1 | -2.662537000 | 3.261782000  | -0.392740000 |
| 6 | 3.066845000  | 0.176151000  | 0.881607000  |
| 7 | -1.443333000 | 1.180051000  | -0.394767000 |
| 1 | -5.481328000 | -0.522344000 | 0.543978000  |

**21A•**

|    |              |              |              |
|----|--------------|--------------|--------------|
| 6  | 0.646310000  | -0.985235000 | 0.576898000  |
| 15 | -0.678431000 | 0.092332000  | -0.007317000 |
| 8  | 2.432432000  | 0.612999000  | -0.020489000 |

|   |              |              |              |
|---|--------------|--------------|--------------|
| 8 | -1.966382000 | -0.163666000 | 0.902465000  |
| 1 | 0.372874000  | -2.026211000 | 0.403683000  |
| 1 | 1.673549000  | 1.228751000  | 0.017319000  |
| 8 | -0.252677000 | 1.513442000  | -0.061736000 |
| 1 | 0.683808000  | -0.833134000 | 1.667667000  |
| 8 | -1.103889000 | -0.569445000 | -1.388649000 |
| 1 | 2.725324000  | -1.413949000 | -0.146004000 |
| 6 | 1.950105000  | -0.663270000 | -0.080409000 |
| 1 | -1.705054000 | -0.031614000 | -1.923857000 |
| 1 | -2.028398000 | 0.435558000  | 1.659272000  |

**21B•**

|    |              |              |              |
|----|--------------|--------------|--------------|
| 6  | -0.580893000 | -1.164060000 | -0.336854000 |
| 15 | 0.782807000  | 0.052773000  | -0.102522000 |
| 8  | -2.296328000 | 0.602524000  | -0.119625000 |
| 8  | 2.069441000  | -0.463264000 | -0.656771000 |
| 1  | -0.318790000 | -2.106708000 | 0.144922000  |
| 1  | -1.486035000 | 1.094762000  | -0.418131000 |
| 8  | 0.223967000  | 1.382758000  | -0.569292000 |
| 1  | -0.596791000 | -1.349007000 | -1.422141000 |
| 8  | 0.968149000  | 0.119552000  | 1.527706000  |
| 1  | -2.466080000 | -1.177826000 | 0.928891000  |
| 6  | -1.898552000 | -0.677482000 | 0.156401000  |
| 1  | 0.280426000  | 0.663864000  | 1.930863000  |

**21C•**

|    |              |              |              |
|----|--------------|--------------|--------------|
| 6  | -0.587955000 | -1.128336000 | -0.411821000 |
| 15 | 0.803471000  | 0.055589000  | 0.037321000  |
| 8  | -2.241914000 | 0.646646000  | -0.045845000 |
| 8  | 2.002709000  | -0.328806000 | -0.822338000 |
| 1  | -0.365956000 | -2.131602000 | -0.040739000 |
| 1  | -1.350991000 | 1.116525000  | -0.242656000 |
| 8  | 0.174671000  | 1.420388000  | -0.373244000 |
| 1  | -0.564837000 | -1.177664000 | -1.510933000 |
| 8  | 1.033642000  | -0.061254000 | 1.541267000  |
| 1  | -2.443045000 | -1.199506000 | 0.875447000  |
| 6  | -1.925396000 | -0.681228000 | 0.071881000  |

**22A•**

|   |             |              |              |
|---|-------------|--------------|--------------|
| 1 | 3.305672000 | -0.984550000 | -2.022214000 |
| 1 | 3.799890000 | -1.033419000 | -0.412751000 |
| 6 | 1.988559000 | -0.169468000 | -0.567320000 |
| 7 | 2.998566000 | -1.181723000 | -1.071832000 |
| 6 | 0.866090000 | -0.848083000 | 0.120429000  |
| 6 | 2.801699000 | 0.760110000  | 0.423894000  |
| 8 | 3.934687000 | 0.316610000  | 0.741652000  |



|   |              |              |              |
|---|--------------|--------------|--------------|
| 1 | 1.140080000  | -1.635998000 | 0.814588000  |
| 1 | 1.665183000  | 0.430180000  | -1.412495000 |
| 8 | 2.228367000  | 1.796547000  | 0.778608000  |
| 6 | -0.489067000 | -0.477625000 | 0.046955000  |
| 6 | -1.452403000 | -1.187519000 | 0.816748000  |
| 6 | -0.980706000 | 0.582129000  | -0.764872000 |
| 6 | -2.793868000 | -0.874905000 | 0.772813000  |
| 1 | -1.118774000 | -1.998645000 | 1.452370000  |
| 6 | -2.322296000 | 0.894684000  | -0.808490000 |
| 1 | -0.295369000 | 1.170708000  | -1.358650000 |
| 6 | -3.242387000 | 0.170378000  | -0.043290000 |
| 1 | -3.504146000 | -1.436265000 | 1.368532000  |
| 1 | -2.681743000 | 1.703935000  | -1.430945000 |
| 8 | -4.552990000 | 0.528515000  | -0.130121000 |
| 1 | -5.094252000 | -0.034206000 | 0.438483000  |
| 1 | 2.659260000  | -2.141261000 | -1.036423000 |

**22B•**

|   |              |              |              |
|---|--------------|--------------|--------------|
| 1 | -4.106642000 | 0.204403000  | -0.710700000 |
| 1 | -3.701887000 | 0.194432000  | 0.851161000  |
| 6 | -2.103672000 | 0.024286000  | -0.369726000 |
| 7 | -3.429904000 | 0.577179000  | -0.051576000 |
| 6 | -1.056459000 | 0.712974000  | 0.494321000  |
| 6 | -2.019298000 | -1.520464000 | -0.148149000 |
| 8 | -2.495484000 | -1.948322000 | 0.934172000  |
| 1 | -1.337968000 | 0.655971000  | 1.547501000  |
| 1 | -1.901394000 | 0.220269000  | -1.423840000 |
| 1 | -1.175075000 | 1.943085000  | 0.228357000  |
| 8 | -1.479268000 | -2.198950000 | -1.055182000 |
| 6 | 0.370045000  | 0.371438000  | 0.290910000  |
| 6 | 1.206853000  | 0.096019000  | 1.377423000  |
| 6 | 0.953067000  | 0.370444000  | -0.984909000 |
| 6 | 2.558991000  | -0.181464000 | 1.209154000  |
| 1 | 0.791464000  | 0.091622000  | 2.378347000  |
| 6 | 2.299187000  | 0.098301000  | -1.169366000 |
| 1 | 0.342328000  | 0.590201000  | -1.851109000 |
| 6 | 3.109817000  | -0.181763000 | -0.069628000 |
| 1 | 3.183231000  | -0.399296000 | 2.068480000  |
| 1 | 2.736992000  | 0.100626000  | -2.159544000 |
| 8 | 4.431697000  | -0.446333000 | -0.308389000 |
| 1 | 4.889436000  | -0.616783000 | 0.524076000  |
| 6 | -1.250034000 | 3.363856000  | -0.137691000 |
| 1 | -1.470159000 | 3.321129000  | -1.199206000 |
| 1 | -0.256789000 | 3.723924000  | 0.110066000  |
| 1 | -2.050761000 | 3.757244000  | 0.478601000  |

**22C•**

|   |              |              |              |
|---|--------------|--------------|--------------|
| 1 | 3.626856000  | -0.697628000 | -1.793204000 |
| 1 | 3.326548000  | -1.734833000 | -0.546540000 |
| 6 | 1.945506000  | -0.134884000 | -0.622181000 |
| 7 | 2.882324000  | -1.148083000 | -1.256327000 |
| 6 | 0.837735000  | -0.832814000 | 0.085079000  |
| 6 | 2.707439000  | 0.742004000  | 0.372811000  |
| 8 | 3.704054000  | 0.071586000  | 0.962222000  |
| 1 | 1.133821000  | -1.623289000 | 0.764688000  |
| 1 | 1.598556000  | 0.506835000  | -1.425773000 |
| 8 | 2.383330000  | 1.871990000  | 0.617712000  |
| 6 | -0.515962000 | -0.465118000 | 0.026569000  |
| 6 | -1.462775000 | -1.195485000 | 0.799894000  |
| 6 | -1.021660000 | 0.607303000  | -0.760923000 |
| 6 | -2.803404000 | -0.888190000 | 0.782250000  |
| 1 | -1.114182000 | -2.015850000 | 1.414557000  |
| 6 | -2.362285000 | 0.915367000  | -0.776458000 |
| 1 | -0.351456000 | 1.209325000  | -1.358583000 |
| 6 | -3.267350000 | 0.172305000  | -0.007933000 |
| 1 | -3.502952000 | -1.462249000 | 1.377873000  |
| 1 | -2.735591000 | 1.734287000  | -1.376994000 |
| 8 | -4.573617000 | 0.527420000  | -0.066754000 |
| 1 | -5.108919000 | -0.044751000 | 0.498966000  |
| 1 | 4.134937000  | 0.633204000  | 1.628577000  |
| 1 | 2.362512000  | -1.759372000 | -1.889372000 |

**22D•**

|   |              |              |              |
|---|--------------|--------------|--------------|
| 1 | -3.887940000 | -0.726330000 | 1.520720000  |
| 1 | -3.475496000 | -1.724368000 | 0.304132000  |
| 6 | -2.064525000 | -0.294771000 | 0.697300000  |
| 7 | -3.108509000 | -1.229382000 | 1.110348000  |
| 6 | -0.914610000 | -1.029980000 | 0.074618000  |
| 6 | -2.510772000 | 0.784100000  | -0.300767000 |
| 8 | -3.344743000 | 0.302940000  | -1.240523000 |
| 1 | -1.731880000 | 0.255341000  | 1.579174000  |
| 1 | -1.167155000 | -1.950028000 | -0.440045000 |
| 8 | -2.132189000 | 1.932134000  | -0.278717000 |
| 6 | 0.422842000  | -0.598058000 | 0.053826000  |
| 6 | 0.865492000  | 0.619987000  | 0.639305000  |
| 6 | 1.417432000  | -1.400956000 | -0.575668000 |
| 6 | 2.193959000  | 0.994677000  | 0.606205000  |
| 1 | 0.150621000  | 1.281802000  | 1.107368000  |
| 6 | 2.741344000  | -1.027268000 | -0.606281000 |
| 1 | 1.118587000  | -2.333884000 | -1.038074000 |
| 6 | 3.143683000  | 0.175622000  | -0.012468000 |
| 1 | 2.504467000  | 1.929684000  | 1.058128000  |

|   |              |              |              |
|---|--------------|--------------|--------------|
| 1 | 3.485288000  | -1.650796000 | -1.085159000 |
| 8 | 4.466672000  | 0.493566000  | -0.073138000 |
| 1 | 4.630608000  | 1.337249000  | 0.367545000  |
| 1 | -3.554515000 | 1.017767000  | -1.863622000 |

**23A•**

|   |              |              |              |
|---|--------------|--------------|--------------|
| 6 | 0.878520000  | -0.384100000 | -0.003680000 |
| 7 | 1.958271000  | -1.311863000 | 0.274828000  |
| 6 | -0.252842000 | -0.596554000 | 1.053294000  |
| 6 | -1.479623000 | 0.193138000  | 0.816131000  |
| 6 | -2.531303000 | -0.309273000 | -0.036666000 |
| 8 | -3.570395000 | 0.554585000  | -0.151727000 |
| 1 | 0.469565000  | -0.613958000 | -0.990407000 |
| 1 | 0.164160000  | -0.353764000 | 2.033440000  |
| 1 | -0.485556000 | -1.661412000 | 1.021299000  |
| 8 | -2.512891000 | -1.388244000 | -0.608669000 |
| 6 | 1.317209000  | 1.092099000  | 0.026172000  |
| 8 | 2.137029000  | 1.462208000  | 0.841374000  |
| 1 | -1.602398000 | 1.178006000  | 1.245694000  |
| 1 | -4.231413000 | 0.153448000  | -0.737971000 |
| 6 | 2.983550000  | -1.354225000 | -0.768818000 |
| 1 | 2.537740000  | -1.709258000 | -1.700029000 |
| 1 | 3.460706000  | -0.384728000 | -0.967322000 |
| 1 | 3.760570000  | -2.060692000 | -0.476405000 |
| 1 | 2.387792000  | -1.051658000 | 1.157180000  |
| 6 | 0.705553000  | 2.019251000  | -0.984739000 |
| 1 | 0.931821000  | 3.056516000  | -0.747344000 |
| 1 | 1.116877000  | 1.768866000  | -1.967514000 |
| 1 | -0.374093000 | 1.871265000  | -1.052405000 |

**23B•**

|   |              |              |              |
|---|--------------|--------------|--------------|
| 6 | 0.794435000  | -0.378430000 | 0.055600000  |
| 7 | 1.923865000  | -1.261266000 | 0.302285000  |
| 6 | -0.275979000 | -0.575686000 | 1.171638000  |
| 6 | -1.560548000 | 0.131942000  | 0.938791000  |
| 6 | -2.531568000 | -0.305219000 | -0.092620000 |
| 8 | -3.548226000 | 0.430905000  | -0.263405000 |
| 1 | 0.328500000  | -0.662174000 | -0.890343000 |
| 1 | 0.170231000  | -0.275731000 | 2.123943000  |
| 1 | -0.453133000 | -1.653722000 | 1.197598000  |
| 8 | -2.268055000 | -1.367518000 | -0.727622000 |
| 6 | 1.185945000  | 1.104913000  | -0.000036000 |
| 8 | 2.079628000  | 1.529945000  | 0.706907000  |
| 1 | -1.782831000 | 1.041054000  | 1.485420000  |
| 6 | 2.892384000  | -1.298357000 | -0.793302000 |
| 1 | 2.410889000  | -1.698921000 | -1.687971000 |

|   |              |              |              |
|---|--------------|--------------|--------------|
| 1 | 3.320080000  | -0.318686000 | -1.048561000 |
| 1 | 3.712575000  | -1.965701000 | -0.525981000 |
| 1 | 2.391659000  | -0.952747000 | 1.148868000  |
| 6 | 0.428999000  | 1.988017000  | -0.951935000 |
| 1 | 0.669386000  | 3.035973000  | -0.783365000 |
| 1 | 0.703063000  | 1.707268000  | -1.973318000 |
| 1 | -0.646268000 | 1.822520000  | -0.858147000 |

**24•**

|   |              |              |              |
|---|--------------|--------------|--------------|
| 1 | 1.226142000  | 1.626039000  | 0.242168000  |
| 6 | 3.471996000  | 0.565941000  | -0.184972000 |
| 1 | 3.903176000  | 0.297731000  | 0.782548000  |
| 1 | 4.134313000  | 0.198316000  | -0.965925000 |
| 1 | 3.408837000  | 1.652657000  | -0.238184000 |
| 6 | 2.130642000  | -0.111626000 | -0.319671000 |
| 1 | -1.713034000 | -2.732939000 | 0.605495000  |
| 8 | 2.007992000  | -1.258916000 | -0.722695000 |
| 6 | -0.515222000 | -1.139127000 | 0.680266000  |
| 6 | -0.259730000 | 0.208661000  | 0.123882000  |
| 7 | 1.049511000  | 0.647298000  | 0.068144000  |
| 6 | -1.348268000 | 1.245554000  | 0.042953000  |
| 8 | 0.113310000  | -1.549352000 | 1.663864000  |
| 7 | -1.509692000 | -1.870950000 | 0.122620000  |
| 1 | -2.298708000 | 0.711011000  | 0.063245000  |
| 6 | -1.285649000 | 2.061040000  | -1.257269000 |
| 1 | -0.360621000 | 2.637555000  | -1.321474000 |
| 1 | -1.340126000 | 1.414680000  | -2.134203000 |
| 1 | -2.119102000 | 2.764310000  | -1.297637000 |
| 6 | -1.330980000 | 2.171356000  | 1.277657000  |
| 1 | -0.419033000 | 2.771835000  | 1.318080000  |
| 1 | -2.175769000 | 2.861063000  | 1.237016000  |
| 1 | -1.400137000 | 1.595102000  | 2.201172000  |
| 6 | -2.144293000 | -1.657671000 | -1.166879000 |
| 1 | -2.250327000 | -2.614222000 | -1.678301000 |
| 1 | -3.133826000 | -1.204432000 | -1.071113000 |
| 1 | -1.521903000 | -1.011771000 | -1.783388000 |

**25•**

|   |              |              |              |
|---|--------------|--------------|--------------|
| 1 | 2.297201000  | 3.179165000  | -0.165762000 |
| 1 | -2.646929000 | 0.385864000  | 1.597735000  |
| 1 | -2.525282000 | 1.992932000  | 0.860172000  |
| 1 | -1.653488000 | -2.569341000 | -0.598416000 |
| 1 | 0.843289000  | -3.202769000 | -0.927212000 |
| 1 | 3.099279000  | -0.423441000 | -0.572219000 |
| 1 | 3.490389000  | -0.594752000 | 1.024798000  |
| 1 | -1.092571000 | 1.038931000  | -0.943813000 |

|   |              |              |              |
|---|--------------|--------------|--------------|
| 1 | 0.779502000  | -1.120889000 | -1.348161000 |
| 1 | 1.256331000  | -0.983667000 | 1.659215000  |
| 1 | 1.750946000  | 1.414565000  | 1.367424000  |
| 6 | 1.589293000  | 2.725604000  | -0.864810000 |
| 8 | 1.545248000  | 1.305192000  | -0.683013000 |
| 8 | -3.582672000 | 0.668015000  | -0.250105000 |
| 6 | -2.516525000 | 0.923015000  | 0.652219000  |
| 8 | -1.917763000 | -1.636744000 | -0.575678000 |
| 8 | 0.623131000  | -2.766546000 | -0.095761000 |
| 7 | 2.846782000  | -0.906105000 | 0.295105000  |
| 8 | -0.170811000 | 1.172803000  | 0.914525000  |
| 6 | -1.153507000 | 0.571020000  | 0.050971000  |
| 6 | -0.901839000 | -0.900385000 | -0.046318000 |
| 6 | 0.495270000  | -1.360435000 | -0.312588000 |
| 6 | 1.167118000  | 0.894694000  | 0.600425000  |
| 1 | -3.597491000 | -0.280465000 | -0.432599000 |
| 1 | 1.921340000  | 2.895647000  | -1.885591000 |
| 1 | 0.600485000  | 3.163738000  | -0.720879000 |
| 6 | 1.418250000  | -0.617241000 | 0.648745000  |
| 1 | 2.984100000  | -1.912179000 | 0.167958000  |

## 26•

|   |              |              |              |
|---|--------------|--------------|--------------|
| 7 | -0.860255000 | -0.141685000 | -0.359537000 |
| 7 | -1.854613000 | -1.992649000 | 0.428920000  |
| 7 | -4.858595000 | 0.113609000  | -0.089334000 |
| 7 | -2.833206000 | 1.250375000  | -0.708693000 |
| 7 | -4.913181000 | -2.046438000 | 0.753944000  |
| 6 | 0.179614000  | 0.782323000  | -0.818145000 |
| 6 | 0.422010000  | 1.926874000  | 0.171695000  |
| 6 | 1.591902000  | 1.379508000  | 1.008574000  |
| 6 | 2.387029000  | 0.597134000  | -0.038442000 |
| 6 | -0.716857000 | -1.427629000 | 0.108539000  |
| 6 | -2.805911000 | -1.029656000 | 0.156302000  |
| 6 | -2.207824000 | 0.126820000  | -0.339004000 |
| 6 | -4.208618000 | -1.005134000 | 0.278424000  |
| 6 | -4.151526000 | 1.151394000  | -0.551394000 |
| 8 | 0.827363000  | 3.063480000  | -0.568927000 |
| 8 | 2.405531000  | 2.396812000  | 1.562773000  |
| 8 | 1.394154000  | 0.072730000  | -0.939940000 |
| 1 | -0.130026000 | 1.175669000  | -1.787131000 |
| 1 | 1.445255000  | 3.559164000  | -0.011075000 |
| 1 | -0.466964000 | 2.139509000  | 0.769346000  |
| 1 | 2.057323000  | 2.648318000  | 2.426414000  |
| 1 | 1.213123000  | 0.707864000  | 1.783093000  |
| 1 | 3.025573000  | 1.299679000  | -0.583326000 |
| 1 | -4.454610000 | -2.910505000 | 0.983450000  |

|    |              |              |              |
|----|--------------|--------------|--------------|
| 1  | -5.917586000 | -2.003630000 | 0.774873000  |
| 1  | 0.253233000  | -1.889302000 | 0.171855000  |
| 1  | -4.732684000 | 2.023288000  | -0.832662000 |
| 6  | 3.219054000  | -0.523109000 | 0.543755000  |
| 1  | 3.916562000  | -0.095731000 | 1.265679000  |
| 1  | 2.585253000  | -1.250218000 | 1.052049000  |
| 16 | 4.187791000  | -1.381486000 | -0.744460000 |
| 6  | 5.180355000  | -2.395784000 | 0.202934000  |
| 1  | 5.255344000  | -2.266145000 | 1.272350000  |
| 1  | 5.832742000  | -3.077304000 | -0.321338000 |

**27•**

|   |              |              |              |
|---|--------------|--------------|--------------|
| 1 | 2.743872000  | -0.667107000 | -0.604383000 |
| 6 | 0.474295000  | -2.792814000 | 0.732188000  |
| 1 | -0.457935000 | -2.327923000 | 0.418485000  |
| 1 | 0.429391000  | -3.861103000 | 0.539208000  |
| 1 | 0.589803000  | -2.638087000 | 1.806064000  |
| 6 | 1.664510000  | -2.243976000 | -0.006226000 |
| 1 | -0.026577000 | 1.205238000  | 1.686618000  |
| 1 | 2.186317000  | 3.412578000  | -0.208621000 |
| 1 | 0.105333000  | -0.499248000 | 1.904151000  |
| 8 | 2.491283000  | -2.988525000 | -0.525473000 |
| 6 | 2.016321000  | 1.455558000  | -0.097183000 |
| 6 | 1.247139000  | 0.267422000  | 0.294669000  |
| 7 | 1.876666000  | -0.884393000 | -0.115037000 |
| 6 | 0.013385000  | 0.268065000  | 1.133861000  |
| 8 | 3.176858000  | 1.313663000  | -0.534576000 |
| 7 | 1.506647000  | 2.710543000  | 0.041165000  |
| 6 | -1.312987000 | 0.071609000  | 0.411435000  |
| 6 | -2.489430000 | 0.049793000  | 1.163408000  |
| 6 | -1.398064000 | -0.085417000 | -0.969996000 |
| 6 | -3.722252000 | -0.124665000 | 0.548114000  |
| 1 | -2.436120000 | 0.169640000  | 2.239365000  |
| 6 | -2.632883000 | -0.261959000 | -1.590118000 |
| 1 | -0.497622000 | -0.073378000 | -1.571402000 |
| 6 | -3.798487000 | -0.281858000 | -0.834241000 |
| 1 | -4.624534000 | -0.138655000 | 1.146602000  |
| 1 | -2.679394000 | -0.383621000 | -2.664998000 |
| 1 | -4.758681000 | -0.419017000 | -1.314898000 |
| 6 | 0.122786000  | 3.166397000  | 0.100168000  |
| 1 | -0.544533000 | 2.472926000  | -0.405681000 |
| 1 | -0.224730000 | 3.311036000  | 1.125056000  |
| 1 | 0.061088000  | 4.123637000  | -0.414546000 |

**28•**

|   |             |             |              |
|---|-------------|-------------|--------------|
| 1 | 1.036729000 | 1.718930000 | -0.590443000 |
|---|-------------|-------------|--------------|

|   |              |              |              |
|---|--------------|--------------|--------------|
| 6 | 2.582094000  | -0.774057000 | 1.070508000  |
| 1 | 2.460020000  | -1.690672000 | 0.494806000  |
| 1 | 3.593925000  | -0.736644000 | 1.465286000  |
| 1 | 1.866013000  | -0.797514000 | 1.891367000  |
| 6 | 2.377657000  | 0.435541000  | 0.198635000  |
| 1 | -3.168181000 | 1.538940000  | -0.083458000 |
| 8 | 3.313430000  | 1.140198000  | -0.166949000 |
| 6 | -1.232862000 | 1.152859000  | -0.226239000 |
| 6 | -0.132459000 | 0.205469000  | 0.012784000  |
| 7 | 1.100193000  | 0.796836000  | -0.165616000 |
| 8 | -1.008903000 | 2.228604000  | -0.813676000 |
| 7 | -2.490037000 | 0.839366000  | 0.177257000  |
| 6 | -0.288297000 | -1.262822000 | 0.123222000  |
| 6 | -1.212827000 | -1.983077000 | -0.827958000 |
| 6 | 0.270067000  | -2.137692000 | -0.978275000 |
| 1 | -0.232613000 | -1.687006000 | 1.120073000  |
| 1 | -1.737576000 | -1.387043000 | -1.562428000 |
| 1 | -1.779353000 | -2.815212000 | -0.432879000 |
| 1 | 0.724150000  | -3.075870000 | -0.688985000 |
| 1 | 0.749485000  | -1.640331000 | -1.811095000 |
| 6 | -2.895521000 | -0.105465000 | 1.209790000  |
| 1 | -3.188979000 | -1.069858000 | 0.794940000  |
| 1 | -2.092335000 | -0.261679000 | 1.927334000  |
| 1 | -3.745706000 | 0.315590000  | 1.744190000  |

**Ado-H**

|   |              |              |              |
|---|--------------|--------------|--------------|
| 7 | 0.220422000  | -0.292879000 | 0.430681000  |
| 7 | 1.654634000  | -1.892738000 | -0.217838000 |
| 7 | 3.993743000  | 0.977958000  | -0.091851000 |
| 7 | 1.753043000  | 1.603625000  | 0.513634000  |
| 7 | 4.606809000  | -1.175437000 | -0.697718000 |
| 6 | -1.023549000 | 0.372399000  | 0.823467000  |
| 6 | -1.679056000 | 1.127635000  | -0.339830000 |
| 6 | -2.696975000 | 0.094401000  | -0.853457000 |
| 6 | -3.130463000 | -0.601833000 | 0.435681000  |
| 6 | -3.642890000 | -2.012903000 | 0.272420000  |
| 6 | 0.415224000  | -1.614585000 | 0.104125000  |
| 6 | 2.318455000  | -0.687542000 | -0.100791000 |
| 6 | 1.443735000  | 0.319043000  | 0.302677000  |
| 6 | 3.659531000  | -0.308083000 | -0.301026000 |
| 6 | 3.044911000  | 1.838838000  | 0.294663000  |
| 8 | -2.343179000 | 2.261455000  | 0.190728000  |
| 8 | -3.822966000 | 0.688795000  | -1.478639000 |
| 8 | -1.941671000 | -0.605758000 | 1.258693000  |
| 1 | -0.778266000 | 1.063088000  | 1.631483000  |
| 1 | -3.140291000 | 2.394522000  | -0.344092000 |

|   |              |              |              |
|---|--------------|--------------|--------------|
| 1 | -0.944839000 | 1.419774000  | -1.094549000 |
| 1 | -3.633037000 | 0.823786000  | -2.414572000 |
| 1 | -2.203784000 | -0.615201000 | -1.522969000 |
| 1 | -3.887681000 | 0.023189000  | 0.920551000  |
| 1 | -2.895460000 | -2.645488000 | -0.209421000 |
| 1 | -4.541528000 | -2.002549000 | -0.346513000 |
| 1 | 4.390203000  | -2.149306000 | -0.816500000 |
| 1 | 5.560597000  | -0.869950000 | -0.786771000 |
| 1 | -0.396121000 | -2.320796000 | 0.143420000  |
| 1 | 3.376868000  | 2.860371000  | 0.447631000  |
| 1 | -3.898229000 | -2.445303000 | 1.240114000  |

Cartesian coordinates of RC, PC and TS for HAA, decay and cyclization reactions for PFL-AE and LAM from **Figure 3** and **Figure 4**.

**PFL-AE**

|   |               |               |              |
|---|---------------|---------------|--------------|
| C | -6.668955000  | -39.094448000 | 19.404607000 |
| S | -5.185893000  | -38.082989000 | 18.991291000 |
| C | -2.257929000  | -34.068201000 | 24.906886000 |
| S | -1.917667000  | -33.798648000 | 23.114547000 |
| C | -4.154338000  | -32.632969000 | 29.356146000 |
| C | -5.461251000  | -32.985012000 | 28.673525000 |
| O | -6.517341000  | -32.434428000 | 28.998044000 |
| C | -3.675200000  | -31.204177000 | 29.000336000 |
| C | -3.252330000  | -30.989563000 | 27.559323000 |
| C | -4.199341000  | -30.963297000 | 26.518349000 |
| C | -1.910128000  | -30.767991000 | 27.217403000 |
| C | -3.833781000  | -30.708185000 | 25.197298000 |
| C | -1.524782000  | -30.511270000 | 25.895946000 |
| C | -2.489209000  | -30.474104000 | 24.882369000 |
| O | -2.178894000  | -30.196325000 | 23.580805000 |
| N | -5.411735000  | -33.899656000 | 27.681283000 |
| C | -6.533464000  | -34.178830000 | 26.786050000 |
| C | -7.868015000  | -34.194518000 | 27.558314000 |
| O | -8.121550000  | -35.082096000 | 28.362601000 |
| C | -6.339144000  | -35.556891000 | 26.143828000 |
| S | -7.629823000  | -35.922063000 | 24.876369000 |
| N | -8.758946000  | -33.242315000 | 27.177578000 |
| C | -10.047746000 | -33.158618000 | 27.839459000 |
| C | -11.122105000 | -34.111588000 | 27.260258000 |
| O | -12.228437000 | -34.150353000 | 27.791574000 |
| C | -10.552164000 | -31.708369000 | 27.930822000 |
| C | -10.663048000 | -30.975338000 | 26.623858000 |
| C | -10.787308000 | -31.469459000 | 25.342130000 |
| N | -10.593016000 | -29.595072000 | 26.570379000 |
| C | -10.658776000 | -29.266265000 | 25.291503000 |



|    |               |               |              |
|----|---------------|---------------|--------------|
| N  | -10.776002000 | -30.370882000 | 24.514415000 |
| N  | -10.750874000 | -34.877442000 | 26.208059000 |
| C  | -11.619377000 | -35.867478000 | 25.592829000 |
| C  | -11.694736000 | -35.702978000 | 24.073312000 |
| C  | -12.400781000 | -34.412119000 | 23.649098000 |
| N  | -12.308244000 | -34.088353000 | 22.333375000 |
| O  | -13.021402000 | -33.717403000 | 24.448428000 |
| C  | -9.880163000  | -28.946450000 | 15.692044000 |
| C  | -9.642939000  | -28.068780000 | 16.930469000 |
| O  | -8.464293000  | -27.610827000 | 17.091475000 |
| O  | -10.618356000 | -27.850897000 | 17.683996000 |
| C  | -6.650367000  | -30.561492000 | 14.217745000 |
| C  | -5.347096000  | -30.434290000 | 14.998617000 |
| O  | -5.020569000  | -29.372245000 | 15.537021000 |
| N  | -4.606714000  | -31.567957000 | 15.086647000 |
| C  | -3.300789000  | -31.662072000 | 15.720692000 |
| C  | -2.802804000  | -28.166726000 | 18.285687000 |
| C  | -3.888391000  | -27.907497000 | 19.321181000 |
| O  | -4.914234000  | -27.280803000 | 18.924463000 |
| O  | -3.720676000  | -28.345074000 | 20.490955000 |
| C  | -2.160801000  | -31.443721000 | 20.433922000 |
| N  | -3.408444000  | -31.057783000 | 21.133315000 |
| C  | -7.076607000  | -24.153286000 | 19.058776000 |
| N  | -8.102142000  | -24.159243000 | 20.089509000 |
| C  | -9.182983000  | -24.961010000 | 20.078245000 |
| N  | -10.082661000 | -24.866713000 | 21.072208000 |
| N  | -9.396449000  | -25.795221000 | 19.066817000 |
| C  | -9.359039000  | -26.911872000 | 32.330059000 |
| C  | -9.665771000  | -27.068918000 | 30.867862000 |
| C  | -9.888020000  | -28.236411000 | 30.158633000 |
| N  | -9.780715000  | -25.988269000 | 30.016455000 |
| C  | -10.056938000 | -26.501997000 | 28.830093000 |
| N  | -10.139361000 | -27.856939000 | 28.860762000 |
| S  | -7.495102000  | -35.760628000 | 20.941237000 |
| S  | -4.500793000  | -36.782226000 | 22.751444000 |
| S  | -3.959632000  | -34.635443000 | 19.888028000 |
| S  | -5.664266000  | -33.134551000 | 22.903182000 |
| Fe | -3.905878000  | -34.545685000 | 22.220268000 |
| Fe | -6.212013000  | -33.640881000 | 20.541086000 |
| Fe | -6.427392000  | -35.373114000 | 22.966891000 |
| Fe | -5.282617000  | -36.426179000 | 20.559930000 |
| N  | -6.931116000  | -33.664951000 | 18.413823000 |
| C  | -7.238256000  | -32.288279000 | 17.995151000 |
| C  | -6.234349000  | -31.320537000 | 18.670127000 |
| O  | -5.539916000  | -31.799258000 | 19.625466000 |
| C  | -8.706637000  | -31.900057000 | 18.293805000 |

|    |               |               |              |
|----|---------------|---------------|--------------|
| C  | -9.316303000  | -32.459676000 | 19.586163000 |
| S  | -8.278776000  | -32.105599000 | 21.053144000 |
| C  | -9.235032000  | -32.968859000 | 22.327055000 |
| C  | -9.725457000  | -29.237923000 | 20.594489000 |
| C  | -8.830775000  | -28.377280000 | 21.392055000 |
| O  | -8.888428000  | -28.745075000 | 22.782913000 |
| C  | -7.318479000  | -28.385609000 | 20.980559000 |
| O  | -6.939193000  | -27.085404000 | 20.604431000 |
| C  | -6.624530000  | -28.878158000 | 22.281001000 |
| O  | -5.356795000  | -28.372818000 | 22.569234000 |
| C  | -7.631725000  | -28.419881000 | 23.335046000 |
| O  | -6.176314000  | -30.162427000 | 18.244341000 |
| N  | -6.924154000  | -27.559533000 | 28.337938000 |
| C  | -7.004718000  | -26.727666000 | 27.297642000 |
| N  | -7.199359000  | -27.031910000 | 26.012502000 |
| C  | -7.318172000  | -28.350288000 | 25.824632000 |
| C  | -7.289250000  | -29.343073000 | 26.814658000 |
| C  | -7.080676000  | -28.886781000 | 28.143201000 |
| N  | -7.044350000  | -29.704102000 | 29.211994000 |
| N  | -7.464518000  | -30.593216000 | 26.238544000 |
| C  | -7.575346000  | -30.362603000 | 24.951077000 |
| N  | -7.499048000  | -29.025634000 | 24.633402000 |
| C  | -13.942770000 | -25.637293000 | 20.827335000 |
| C  | -13.164959000 | -26.934675000 | 20.849757000 |
| O  | -11.962009000 | -26.961229000 | 21.122722000 |
| N  | -13.852201000 | -28.073409000 | 20.571837000 |
| C  | -13.194195000 | -29.363333000 | 20.487355000 |
| C  | -13.072903000 | -30.152091000 | 21.799075000 |
| O  | -12.313000000 | -31.129570000 | 21.846999000 |
| N  | -13.847435000 | -29.742714000 | 22.813884000 |
| C  | -13.980204000 | -30.421112000 | 24.094318000 |
| C  | -2.438130000  | -26.177569000 | 25.078540000 |
| C  | -3.509576000  | -26.878364000 | 25.921226000 |
| C  | -2.429069000  | -26.644210000 | 23.618583000 |
| C  | -5.404181000  | -22.904772000 | 24.902314000 |
| C  | -6.361449000  | -23.403856000 | 23.807800000 |
| C  | -5.787117000  | -24.641103000 | 23.104751000 |
| C  | -7.754638000  | -23.703156000 | 24.380603000 |
| Na | -6.292791000  | -28.181201000 | 17.234058000 |
| H  | -2.831478000  | -30.960759000 | 29.667872000 |
| H  | -4.491045000  | -30.503902000 | 29.253816000 |
| H  | -5.256160000  | -31.125446000 | 26.737383000 |
| H  | -1.142661000  | -30.779777000 | 27.998696000 |
| H  | -4.583337000  | -30.668093000 | 24.403556000 |
| H  | -0.471955000  | -30.332247000 | 25.653593000 |
| H  | -1.218549000  | -30.080775000 | 23.477761000 |

|   |               |               |              |
|---|---------------|---------------|--------------|
| H | -4.344982000  | -32.677500000 | 30.441912000 |
| H | -9.858392000  | -31.145854000 | 28.580510000 |
| H | -11.526854000 | -31.737960000 | 28.448579000 |
| H | -10.883863000 | -32.481915000 | 24.966989000 |
| H | -10.835935000 | -30.384236000 | 23.499350000 |
| H | -10.597054000 | -28.262748000 | 24.874589000 |
| H | -9.924188000  | -33.522949000 | 28.873624000 |
| H | -12.241880000 | -36.559702000 | 23.637331000 |
| H | -10.679291000 | -35.731951000 | 23.635068000 |
| H | -12.550006000 | -33.130788000 | 22.061934000 |
| H | -11.692894000 | -34.608052000 | 21.716441000 |
| H | -12.616181000 | -35.738950000 | 26.036351000 |
| H | -9.046747000  | -29.654004000 | 15.552729000 |
| H | -10.828091000 | -29.500963000 | 15.784155000 |
| H | -7.372174000  | -31.172809000 | 14.788356000 |
| H | -3.122801000  | -30.740687000 | 16.292572000 |
| H | -1.841368000  | -28.423113000 | 18.757414000 |
| H | -3.129205000  | -29.005056000 | 17.644152000 |
| H | -2.221227000  | -32.509903000 | 20.174606000 |
| H | -2.066947000  | -30.834187000 | 19.523187000 |
| H | -3.474501000  | -31.541567000 | 22.043189000 |
| H | -4.259178000  | -31.298913000 | 20.550702000 |
| H | -3.435970000  | -30.029497000 | 21.273482000 |
| H | -6.371978000  | -24.996846000 | 19.169226000 |
| H | -7.547256000  | -24.205664000 | 18.063171000 |
| H | -7.862765000  | -23.727771000 | 20.976150000 |
| H | -10.833847000 | -25.571505000 | 21.160870000 |
| H | -10.014027000 | -24.125148000 | 21.760014000 |
| H | -10.218267000 | -26.406445000 | 19.007644000 |
| H | -8.644493000  | -26.184132000 | 18.484825000 |
| H | -9.330281000  | -27.894542000 | 32.831763000 |
| H | -10.126554000 | -26.295757000 | 32.836327000 |
| H | -9.874671000  | -29.281207000 | 30.462118000 |
| H | -10.309905000 | -28.485914000 | 28.045191000 |
| H | -10.199398000 | -25.935994000 | 27.907395000 |
| H | -14.982549000 | -25.748189000 | 20.481548000 |
| H | -12.180128000 | -29.224977000 | 20.089629000 |
| H | -13.748281000 | -30.002848000 | 19.780887000 |
| H | -14.827974000 | -28.004655000 | 20.302710000 |
| H | -13.542423000 | -31.428480000 | 24.029778000 |
| H | -14.394690000 | -28.900413000 | 22.662503000 |
| H | -1.442152000  | -26.361143000 | 25.527564000 |
| H | -3.497792000  | -26.529191000 | 26.970381000 |
| H | -3.355316000  | -27.973124000 | 25.928308000 |
| H | -4.522633000  | -26.692275000 | 25.521842000 |
| H | -2.218554000  | -27.726033000 | 23.549085000 |

|   |               |               |              |
|---|---------------|---------------|--------------|
| H | -3.410521000  | -26.482696000 | 23.139632000 |
| H | -1.665171000  | -26.107139000 | 23.025720000 |
| H | -5.303805000  | -23.664631000 | 25.701547000 |
| H | -4.393934000  | -22.719760000 | 24.492064000 |
| H | -6.465519000  | -22.595063000 | 23.055391000 |
| H | -5.655402000  | -25.469840000 | 23.822446000 |
| H | -6.447887000  | -25.020602000 | 22.304739000 |
| H | -4.800909000  | -24.428244000 | 22.652746000 |
| H | -8.187969000  | -22.818731000 | 24.883199000 |
| H | -7.703079000  | -24.533958000 | 25.108631000 |
| H | -8.454706000  | -24.017493000 | 23.583113000 |
| H | -6.484110000  | -39.720064000 | 20.294524000 |
| H | -7.534608000  | -38.441988000 | 19.604340000 |
| H | -1.729782000  | -33.303007000 | 25.499398000 |
| H | -3.338232000  | -33.975324000 | 25.108929000 |
| H | -4.508412000  | -34.280077000 | 27.416690000 |
| H | -6.563303000  | -33.411454000 | 25.993141000 |
| H | -6.395368000  | -36.318674000 | 26.938121000 |
| H | -5.341748000  | -35.618078000 | 25.675932000 |
| H | -7.080622000  | -32.155603000 | 16.911001000 |
| H | -8.769658000  | -30.799030000 | 18.290502000 |
| H | -9.342659000  | -32.254103000 | 17.462888000 |
| H | -9.427620000  | -33.556456000 | 19.537378000 |
| H | -10.314309000 | -32.020600000 | 19.750092000 |
| H | -8.634142000  | -32.960907000 | 23.248726000 |
| H | -9.378062000  | -34.019036000 | 22.032277000 |
| H | -10.201237000 | -32.467781000 | 22.478628000 |
| H | -10.322678000 | -30.005969000 | 21.085281000 |
| H | -9.928359000  | -28.966739000 | 19.555272000 |
| H | -9.144913000  | -27.319903000 | 21.312564000 |
| H | -7.136315000  | -29.095436000 | 20.158513000 |
| H | -6.120825000  | -27.143574000 | 20.031752000 |
| H | -6.628863000  | -29.987409000 | 22.263739000 |
| H | -4.812231000  | -28.277781000 | 21.738862000 |
| H | -7.516214000  | -27.331779000 | 23.491272000 |
| H | -6.892088000  | -25.660158000 | 27.527273000 |
| H | -6.875325000  | -29.274764000 | 30.115544000 |
| H | -6.956354000  | -30.722609000 | 29.119172000 |
| H | -7.713978000  | -31.122620000 | 24.184473000 |
| H | -9.787643000  | -34.823298000 | 25.872198000 |
| H | -3.379159000  | -33.373587000 | 29.119334000 |
| H | -15.050133000 | -30.510044000 | 24.349193000 |
| H | -13.468995000 | -29.860638000 | 24.896570000 |
| H | -11.265107000 | -36.892462000 | 25.830988000 |
| H | -1.913798000  | -35.072741000 | 25.208304000 |
| H | -6.898252000  | -39.750033000 | 18.546878000 |

|   |               |               |              |
|---|---------------|---------------|--------------|
| H | -1.304832000  | -31.275093000 | 21.103854000 |
| H | -13.413484000 | -24.924069000 | 20.173203000 |
| H | -13.944702000 | -25.212607000 | 21.846283000 |
| H | -6.526289000  | -23.201162000 | 19.125145000 |
| H | -5.754194000  | -21.962790000 | 25.369743000 |
| H | -2.588136000  | -25.079365000 | 25.119182000 |
| H | -2.689218000  | -27.283585000 | 17.635547000 |
| H | -6.522915000  | -31.032517000 | 13.223460000 |
| H | -3.241182000  | -32.525914000 | 16.408859000 |
| H | -2.501213000  | -31.776673000 | 14.964116000 |
| H | -9.936356000  | -28.312976000 | 14.783498000 |
| H | -8.384156000  | -26.413538000 | 32.509369000 |
| H | -6.111783000  | -34.023305000 | 17.915277000 |
| H | -8.379668000  | -32.388171000 | 26.748874000 |
| H | -4.933335000  | -32.382188000 | 14.575950000 |
| H | -7.077489000  | -29.557395000 | 14.083165000 |
| H | -7.697259000  | -34.316126000 | 18.230167000 |

#### LAM

|   |               |              |               |
|---|---------------|--------------|---------------|
| C | -50.944127000 | 14.239373000 | -69.032011000 |
| S | -49.676737000 | 15.520158000 | -68.638620000 |
| C | -50.277543000 | 10.530594000 | -62.716538000 |
| S | -49.944593000 | 10.382551000 | -64.522401000 |
| C | -48.711151000 | 11.683120000 | -58.070553000 |
| C | -48.206125000 | 10.483840000 | -58.828181000 |
| C | -47.519233000 | 10.454901000 | -60.032574000 |
| N | -48.338833000 | 9.196938000  | -58.345439000 |
| C | -47.749445000 | 8.419210000  | -59.237987000 |
| N | -47.236023000 | 9.128138000  | -60.277412000 |
| C | -49.046043000 | 15.451148000 | -61.120591000 |
| S | -47.683711000 | 16.148062000 | -62.152055000 |
| C | -44.654700000 | 16.948860000 | -59.800015000 |
| C | -43.251257000 | 17.399063000 | -59.423577000 |
| O | -44.595470000 | 16.204566000 | -61.005176000 |
| C | -43.776019000 | 18.930122000 | -63.614957000 |
| N | -43.415513000 | 18.476712000 | -64.948955000 |
| C | -42.287937000 | 17.817617000 | -65.255812000 |
| N | -41.426314000 | 17.449820000 | -64.297066000 |
| N | -41.984314000 | 17.564213000 | -66.535696000 |
| C | -40.265750000 | 16.426161000 | -70.095747000 |
| O | -40.913803000 | 15.961865000 | -68.931926000 |
| C | -44.309952000 | 7.283136000  | -66.036573000 |
| C | -44.926539000 | 7.833286000  | -64.783091000 |
| C | -45.218765000 | 7.293881000  | -63.540838000 |
| N | -45.431894000 | 9.116109000  | -64.734925000 |

|   |               |              |               |
|---|---------------|--------------|---------------|
| C | -45.989324000 | 9.303792000  | -63.513968000 |
| N | -45.883589000 | 8.220817000  | -62.760081000 |
| C | -38.964421000 | 6.547809000  | -63.519102000 |
| C | -39.019232000 | 8.025118000  | -63.904421000 |
| C | -37.717358000 | 8.495323000  | -64.585593000 |
| C | -37.793696000 | 9.941213000  | -65.045548000 |
| N | -38.278011000 | 10.153451000 | -66.288151000 |
| O | -37.463619000 | 10.890463000 | -64.326327000 |
| C | -43.241242000 | 8.224355000  | -58.717392000 |
| C | -43.820907000 | 7.476195000  | -59.921572000 |
| C | -44.249215000 | 9.186033000  | -58.081377000 |
| C | -39.288670000 | 9.971556000  | -57.409976000 |
| C | -38.580361000 | 10.496831000 | -58.636867000 |
| C | -38.907629000 | 10.035468000 | -59.922106000 |
| C | -37.534598000 | 11.431677000 | -58.537814000 |
| C | -38.216100000 | 10.475606000 | -61.053330000 |
| C | -36.823400000 | 11.871610000 | -59.655957000 |
| C | -37.155755000 | 11.389241000 | -60.930462000 |
| O | -36.457936000 | 11.834181000 | -62.003138000 |
| C | -42.467531000 | 15.448093000 | -55.375401000 |
| C | -41.300939000 | 14.900417000 | -56.219831000 |
| O | -40.455519000 | 14.153344000 | -55.690754000 |
| O | -41.331195000 | 15.242189000 | -57.448847000 |
| C | -36.780219000 | 15.336348000 | -56.437308000 |
| C | -36.408069000 | 14.794063000 | -57.835891000 |
| O | -35.318345000 | 14.203067000 | -57.968427000 |
| O | -37.271101000 | 14.991232000 | -58.749021000 |
| N | -45.197819000 | 13.301788000 | -68.095416000 |
| C | -43.914042000 | 12.581069000 | -68.110350000 |
| C | -44.024654000 | 11.313096000 | -67.224093000 |
| O | -43.077150000 | 10.504904000 | -67.266751000 |
| C | -42.755937000 | 13.493689000 | -67.662378000 |
| C | -43.037916000 | 14.443999000 | -66.493948000 |
| S | -43.805409000 | 13.619836000 | -65.051373000 |
| C | -43.979017000 | 15.010957000 | -63.904028000 |
| C | -40.759468000 | 12.198265000 | -65.072562000 |
| C | -41.027700000 | 11.293588000 | -63.940947000 |
| O | -41.337448000 | 12.007159000 | -62.743173000 |
| C | -42.248334000 | 10.349781000 | -64.106825000 |
| O | -42.069391000 | 9.338639000  | -65.048526000 |
| C | -42.463779000 | 9.878901000  | -62.660640000 |
| O | -41.658752000 | 8.750771000  | -62.380081000 |
| C | -41.987021000 | 11.124225000 | -61.843865000 |
| O | -45.074099000 | 11.203877000 | -66.514557000 |
| N | -43.694306000 | 12.893311000 | -57.328899000 |
| C | -42.514970000 | 12.361506000 | -57.679227000 |

|    |               |              |               |
|----|---------------|--------------|---------------|
| N  | -42.118704000 | 11.967157000 | -58.892120000 |
| C  | -43.064071000 | 12.164197000 | -59.818527000 |
| C  | -44.319188000 | 12.752184000 | -59.608666000 |
| C  | -44.616434000 | 13.128259000 | -58.277758000 |
| N  | -45.790724000 | 13.708484000 | -57.941815000 |
| N  | -45.050213000 | 12.781805000 | -60.778583000 |
| C  | -44.270087000 | 12.222953000 | -61.671223000 |
| N  | -43.048936000 | 11.823806000 | -61.157603000 |
| S  | -50.036613000 | 14.410674000 | -64.884432000 |
| S  | -48.269470000 | 12.285462000 | -67.238602000 |
| S  | -46.906836000 | 12.630207000 | -63.815249000 |
| S  | -46.770049000 | 15.605269000 | -66.102849000 |
| Fe | -46.154543000 | 13.113688000 | -66.081935000 |
| Fe | -47.758918000 | 14.840582000 | -64.098740000 |
| Fe | -48.697334000 | 14.535695000 | -66.820251000 |
| Fe | -48.871607000 | 12.358007000 | -64.995816000 |
| C  | -36.186947000 | 16.581218000 | -65.310115000 |
| N  | -37.376023000 | 16.288756000 | -64.987431000 |
| C  | -37.868555000 | 14.948725000 | -65.283827000 |
| C  | -39.087292000 | 15.094064000 | -66.235051000 |
| O  | -40.071288000 | 15.759923000 | -65.803611000 |
| C  | -38.152687000 | 14.194924000 | -63.964009000 |
| C  | -39.140318000 | 14.816880000 | -62.964261000 |
| C  | -39.056827000 | 14.105017000 | -61.607482000 |
| C  | -40.033760000 | 14.630572000 | -60.557697000 |
| N  | -39.748986000 | 14.055629000 | -59.213600000 |
| O  | -39.018621000 | 14.578514000 | -67.372838000 |
| H  | -48.878157000 | 12.536914000 | -58.751671000 |
| H  | -47.979019000 | 12.014216000 | -57.309166000 |
| H  | -47.191419000 | 11.250370000 | -60.700153000 |
| H  | -46.731067000 | 8.730451000  | -61.095318000 |
| H  | -47.666300000 | 7.332091000  | -59.182425000 |
| H  | -45.317422000 | 17.833088000 | -59.920215000 |
| H  | -43.286210000 | 18.078159000 | -58.551892000 |
| H  | -42.614515000 | 16.541995000 | -59.143420000 |
| H  | -42.782919000 | 17.940226000 | -60.267159000 |
| H  | -45.516583000 | 15.998318000 | -61.290339000 |
| H  | -44.239641000 | 18.132303000 | -63.002603000 |
| H  | -42.887492000 | 19.317708000 | -63.088493000 |
| H  | -44.084412000 | 18.632528000 | -65.695252000 |
| H  | -41.715252000 | 17.450185000 | -63.325675000 |
| H  | -40.659713000 | 16.811783000 | -64.594162000 |
| H  | -41.246481000 | 16.868746000 | -66.729343000 |
| H  | -42.638076000 | 17.787095000 | -67.277047000 |
| H  | -39.462834000 | 17.162204000 | -69.872032000 |
| H  | -39.808399000 | 15.601845000 | -70.684237000 |

|   |               |              |               |
|---|---------------|--------------|---------------|
| H | -40.276497000 | 15.419146000 | -68.390411000 |
| H | -43.905497000 | 8.104904000  | -66.649222000 |
| H | -45.062581000 | 6.749466000  | -66.648785000 |
| H | -44.985731000 | 6.294378000  | -63.171465000 |
| H | -46.461693000 | 10.245772000 | -63.234820000 |
| H | -39.205914000 | 8.628022000  | -63.004895000 |
| H | -39.884885000 | 8.215633000  | -64.559781000 |
| H | -36.876523000 | 8.424492000  | -63.875312000 |
| H | -37.489857000 | 7.839156000  | -65.445538000 |
| H | -38.428560000 | 11.110740000 | -66.596914000 |
| H | -38.617153000 | 9.397542000  | -66.873261000 |
| H | -38.070154000 | 6.315223000  | -62.911605000 |
| H | -42.345797000 | 8.798278000  | -59.026956000 |
| H | -44.186371000 | 8.171070000  | -60.698435000 |
| H | -44.690241000 | 6.860430000  | -59.624026000 |
| H | -43.080766000 | 6.794809000  | -60.382710000 |
| H | -43.809667000 | 9.729973000  | -57.226869000 |
| H | -45.147825000 | 8.649151000  | -57.724957000 |
| H | -44.591292000 | 9.938890000  | -58.814621000 |
| H | -39.321550000 | 10.731797000 | -56.609006000 |
| H | -40.327640000 | 9.677491000  | -57.640260000 |
| H | -39.723875000 | 9.316687000  | -60.050444000 |
| H | -37.260477000 | 11.841630000 | -57.559306000 |
| H | -38.499786000 | 10.128525000 | -62.047182000 |
| H | -36.040796000 | 12.623334000 | -59.529693000 |
| H | -36.813417000 | 11.436052000 | -62.837373000 |
| H | -42.568398000 | 16.538804000 | -55.522157000 |
| H | -43.394490000 | 14.975303000 | -55.745252000 |
| H | -37.117418000 | 16.386037000 | -56.518531000 |
| H | -37.640870000 | 14.762873000 | -56.041812000 |
| H | -51.824301000 | 14.346152000 | -68.374826000 |
| H | -50.522376000 | 13.229936000 | -68.896380000 |
| H | -50.116135000 | 9.553146000  | -62.229953000 |
| H | -49.598505000 | 11.262143000 | -62.248000000 |
| H | -49.334414000 | 16.188902000 | -60.351958000 |
| H | -49.921995000 | 15.234122000 | -61.754419000 |
| H | -45.105790000 | 14.263181000 | -68.431522000 |
| H | -43.666304000 | 12.213384000 | -69.122186000 |
| H | -41.898614000 | 12.847879000 | -67.425918000 |
| H | -42.437494000 | 14.136939000 | -68.500543000 |
| H | -42.089044000 | 14.895587000 | -66.171916000 |
| H | -43.728916000 | 15.250568000 | -66.790079000 |
| H | -44.626627000 | 14.668003000 | -63.085187000 |
| H | -42.995204000 | 15.292419000 | -63.499549000 |
| H | -44.460930000 | 15.863103000 | -64.407572000 |
| H | -40.818397000 | 13.280985000 | -64.974621000 |



|   |               |              |               |
|---|---------------|--------------|---------------|
| H | -40.585789000 | 11.745670000 | -66.049614000 |
| H | -40.147030000 | 10.638972000 | -63.766613000 |
| H | -43.111577000 | 10.985233000 | -64.370895000 |
| H | -42.441018000 | 9.676459000  | -65.906080000 |
| H | -43.524967000 | 9.651345000  | -62.461254000 |
| H | -41.929153000 | 8.389667000  | -61.519897000 |
| H | -41.284109000 | 10.798619000 | -61.060949000 |
| H | -41.783647000 | 12.254979000 | -56.871041000 |
| H | -45.982360000 | 13.938575000 | -56.973668000 |
| H | -46.500163000 | 13.867505000 | -58.646839000 |
| H | -44.537025000 | 12.063603000 | -62.715657000 |
| H | -35.494526000 | 15.872279000 | -65.814236000 |
| H | -37.111140000 | 14.359506000 | -65.839703000 |
| H | -37.175403000 | 14.080561000 | -63.459405000 |
| H | -38.912692000 | 15.891326000 | -62.838290000 |
| H | -40.169267000 | 14.755706000 | -63.358961000 |
| H | -38.037559000 | 14.204249000 | -61.196575000 |
| H | -39.241977000 | 13.027550000 | -61.750788000 |
| H | -39.949376000 | 15.725407000 | -60.450180000 |
| H | -41.080016000 | 14.398209000 | -60.821244000 |
| H | -40.393751000 | 14.493697000 | -58.447642000 |
| H | -45.887628000 | 12.841249000 | -68.694822000 |
| H | -39.882417000 | 13.034241000 | -59.202783000 |
| H | -38.746421000 | 14.295509000 | -58.943082000 |
| H | -38.468289000 | 13.168756000 | -64.215317000 |
| H | -45.315650000 | 9.854561000  | -65.460814000 |
| H | -41.004593000 | 16.930446000 | -70.758133000 |
| H | -51.261520000 | 14.357695000 | -70.081909000 |
| H | -51.322620000 | 10.844297000 | -62.551717000 |
| H | -49.661419000 | 11.476913000 | -57.534189000 |
| H | -39.853000000 | 6.232544000  | -62.953146000 |
| H | -38.768273000 | 9.078870000  | -57.002293000 |
| H | -35.930657000 | 15.274712000 | -55.730140000 |
| H | -42.887769000 | 7.489038000  | -57.966145000 |
| H | -42.364048000 | 15.224415000 | -54.297091000 |
| H | -45.073777000 | 16.339106000 | -58.968283000 |
| H | -43.482217000 | 6.576208000  | -65.842468000 |
| H | -44.475203000 | 19.767611000 | -63.736529000 |
| H | -38.951035000 | 5.911356000  | -64.412720000 |
| H | -48.749492000 | 14.517895000 | -60.609670000 |
| H | -35.791573000 | 17.586854000 | -65.087925000 |

**PFL-AE-TS-HAA**

|   |              |              |              |
|---|--------------|--------------|--------------|
| C | -6.144271000 | -5.743692000 | 2.642479000  |
| S | -6.540868000 | -5.111792000 | 0.956197000  |
| C | -0.541688000 | -4.747661000 | -3.940523000 |

|   |              |              |              |
|---|--------------|--------------|--------------|
| S | -2.139858000 | -3.851818000 | -4.154709000 |
| C | 4.487202000  | -4.951194000 | -3.168479000 |
| C | 4.074466000  | -4.630400000 | -1.746590000 |
| O | 4.826907000  | -4.019695000 | -0.981675000 |
| C | 4.591962000  | -3.679315000 | -4.044445000 |
| C | 3.282306000  | -2.952725000 | -4.280935000 |
| C | 2.666904000  | -2.221671000 | -3.248236000 |
| C | 2.648673000  | -2.965263000 | -5.532071000 |
| C | 1.477631000  | -1.523140000 | -3.448661000 |
| C | 1.453748000  | -2.269377000 | -5.751653000 |
| C | 0.865639000  | -1.546565000 | -4.707463000 |
| O | -0.289620000 | -0.833270000 | -4.865526000 |
| N | 2.835423000  | -5.015947000 | -1.376146000 |
| C | 2.194111000  | -4.615971000 | -0.125644000 |
| C | 3.210183000  | -4.612182000 | 1.033507000  |
| O | 3.675446000  | -5.659743000 | 1.463963000  |
| C | 1.084829000  | -5.620081000 | 0.206112000  |
| S | 0.104313000  | -5.111319000 | 1.681879000  |
| N | 3.446671000  | -3.396684000 | 1.592593000  |
| C | 4.428036000  | -3.285515000 | 2.657247000  |
| C | 3.863272000  | -3.578760000 | 4.068159000  |
| O | 4.625756000  | -3.565561000 | 5.030054000  |
| C | 5.188890000  | -1.949706000 | 2.602895000  |
| C | 4.333728000  | -0.719890000 | 2.708363000  |
| C | 3.061859000  | -0.584170000 | 3.222326000  |
| N | 4.755140000  | 0.502737000  | 2.219134000  |
| C | 3.757105000  | 1.348357000  | 2.423323000  |
| N | 2.712611000  | 0.730101000  | 3.027823000  |
| N | 2.541395000  | -3.865107000 | 4.144538000  |
| C | 1.876446000  | -4.237120000 | 5.382304000  |
| C | 0.596121000  | -3.436687000 | 5.623957000  |
| C | 0.850333000  | -1.951023000 | 5.894068000  |
| N | -0.249579000 | -1.151841000 | 5.874351000  |
| O | 1.972232000  | -1.509966000 | 6.123643000  |
| C | -4.814578000 | 5.635325000  | 2.849227000  |
| C | -3.461227000 | 5.886525000  | 2.175089000  |
| O | -3.440452000 | 5.824598000  | 0.903082000  |
| O | -2.475937000 | 6.140693000  | 2.906894000  |
| C | -7.636253000 | 3.940584000  | 0.534493000  |
| C | -7.208849000 | 3.388178000  | -0.820840000 |
| O | -6.367312000 | 3.966539000  | -1.516203000 |
| N | -7.787391000 | 2.216316000  | -1.182266000 |
| C | -7.583244000 | 1.541431000  | -2.454773000 |
| C | -4.182402000 | 3.370773000  | -4.348573000 |
| C | -2.870446000 | 3.442655000  | -3.576714000 |
| O | -2.735935000 | 4.415509000  | -2.778851000 |

|    |              |              |              |
|----|--------------|--------------|--------------|
| O  | -2.010661000 | 2.534278000  | -3.749099000 |
| C  | -3.634881000 | -0.624053000 | -4.235039000 |
| N  | -2.603236000 | -0.143053000 | -3.283457000 |
| C  | -0.867733000 | 7.654489000  | -1.882734000 |
| N  | 0.335016000  | 7.477486000  | -1.087432000 |
| C  | 0.319973000  | 7.083154000  | 0.196974000  |
| N  | 1.474840000  | 6.966612000  | 0.872998000  |
| N  | -0.837947000 | 6.870338000  | 0.812409000  |
| C  | 10.548064000 | -0.007689000 | -0.669085000 |
| C  | 9.277696000  | 0.573901000  | -0.115342000 |
| C  | 8.263775000  | -0.074015000 | 0.569241000  |
| N  | 8.975652000  | 1.917570000  | -0.213682000 |
| C  | 7.808765000  | 2.062129000  | 0.390481000  |
| N  | 7.336107000  | 0.890546000  | 0.888297000  |
| S  | -3.364932000 | -3.405737000 | 2.038166000  |
| S  | -2.913939000 | -5.679312000 | -0.770328000 |
| S  | -4.845464000 | -2.714684000 | -1.474216000 |
| S  | -1.148037000 | -2.302307000 | -0.817883000 |
| Fe | -2.734986000 | -3.622767000 | -1.934474000 |
| Fe | -3.295974000 | -1.644547000 | 0.231651000  |
| Fe | -1.697001000 | -4.132487000 | 0.589914000  |
| Fe | -4.532662000 | -4.288174000 | 0.220802000  |
| N  | -5.012488000 | -0.628750000 | 1.253370000  |
| C  | -4.778329000 | 0.822730000  | 1.264821000  |
| C  | -4.062243000 | 1.228407000  | -0.050563000 |
| O  | -3.606563000 | 0.276100000  | -0.763476000 |
| C  | -4.000232000 | 1.275521000  | 2.521895000  |
| C  | -2.877717000 | 0.350444000  | 3.018425000  |
| S  | -1.720649000 | -0.142864000 | 1.682965000  |
| C  | -0.610489000 | -1.239525000 | 2.603412000  |
| C  | -0.962750000 | 3.309108000  | 1.955297000  |
| C  | 0.024054000  | 3.486552000  | 0.855167000  |
| O  | 1.099018000  | 2.529718000  | 0.933146000  |
| C  | -0.657238000 | 3.285257000  | -0.540633000 |
| O  | -0.564235000 | 4.470700000  | -1.284767000 |
| C  | 0.153582000  | 2.105811000  | -1.142562000 |
| O  | 0.341514000  | 2.108965000  | -2.523614000 |
| C  | 1.479880000  | 2.276305000  | -0.404820000 |
| O  | -3.988232000 | 2.435770000  | -0.311953000 |
| N  | 6.035536000  | 0.669147000  | -2.082322000 |
| C  | 5.450363000  | 1.867688000  | -2.110975000 |
| N  | 4.257375000  | 2.212619000  | -1.621914000 |
| C  | 3.632024000  | 1.176482000  | -1.054413000 |
| C  | 4.124071000  | -0.129461000 | -0.923114000 |
| C  | 5.411560000  | -0.363086000 | -1.474760000 |
| N  | 6.045169000  | -1.548469000 | -1.412763000 |

|    |              |              |              |
|----|--------------|--------------|--------------|
| N  | 3.192320000  | -0.924704000 | -0.271235000 |
| C  | 2.173326000  | -0.131734000 | -0.033811000 |
| N  | 2.378682000  | 1.156566000  | -0.474411000 |
| C  | 0.076030000  | 7.365791000  | 4.504219000  |
| C  | 0.323038000  | 5.910463000  | 4.178886000  |
| O  | 1.058664000  | 5.541774000  | 3.261060000  |
| N  | -0.356125000 | 5.011376000  | 4.948798000  |
| C  | -0.512966000 | 3.641586000  | 4.572463000  |
| C  | 0.513500000  | 2.627914000  | 4.956999000  |
| O  | 0.341170000  | 1.445471000  | 4.599143000  |
| N  | 1.597457000  | 3.045450000  | 5.633326000  |
| C  | 2.681864000  | 2.173091000  | 6.055288000  |
| C  | 2.586678000  | 2.066281000  | -6.325689000 |
| C  | 3.370302000  | 1.457592000  | -5.157382000 |
| C  | 1.098065000  | 2.256361000  | -6.012297000 |
| C  | 4.336658000  | 5.775940000  | -4.746232000 |
| C  | 3.388956000  | 6.088497000  | -3.576847000 |
| C  | 2.112795000  | 5.240466000  | -3.667164000 |
| C  | 4.088250000  | 5.880849000  | -2.225241000 |
| Na | -4.132615000 | 4.607066000  | -0.869605000 |
| H  | 5.031267000  | -3.973688000 | -5.012453000 |
| H  | 5.312121000  | -2.995166000 | -3.561578000 |
| H  | 3.125547000  | -2.182984000 | -2.259650000 |
| H  | 3.097605000  | -3.521393000 | -6.361918000 |
| H  | 1.018013000  | -0.946502000 | -2.642776000 |
| H  | 0.976230000  | -2.290108000 | -6.736823000 |
| H  | -0.669070000 | -0.998382000 | -5.745899000 |
| H  | 5.480164000  | -5.429281000 | -3.115726000 |
| H  | 5.742122000  | -1.910713000 | 1.647598000  |
| H  | 5.941144000  | -1.973567000 | 3.410858000  |
| H  | 2.398138000  | -1.293109000 | 3.701993000  |
| H  | 1.817813000  | 1.138826000  | 3.309378000  |
| H  | 3.728919000  | 2.397472000  | 2.132625000  |
| H  | 5.172283000  | -4.087061000 | 2.514123000  |
| H  | 0.059448000  | -3.861476000 | 6.492906000  |
| H  | -0.086966000 | -3.544973000 | 4.760695000  |
| H  | -0.092926000 | -0.148097000 | 5.739807000  |
| H  | -1.137327000 | -1.521398000 | 5.550020000  |
| H  | 2.593269000  | -4.062008000 | 6.196113000  |
| H  | -5.329618000 | 4.779770000  | 2.379527000  |
| H  | -4.692052000 | 5.453744000  | 3.929173000  |
| H  | -7.218777000 | 3.314488000  | 1.343912000  |
| H  | -6.779320000 | 2.055198000  | -2.999657000 |
| H  | -4.144750000 | 2.619294000  | -5.152533000 |
| H  | -4.990665000 | 3.116832000  | -3.639243000 |
| H  | -4.150380000 | -1.485521000 | -3.789082000 |

|   |              |              |              |
|---|--------------|--------------|--------------|
| H | -4.350396000 | 0.191066000  | -4.420897000 |
| H | -1.841321000 | -0.834015000 | -3.199922000 |
| H | -3.003595000 | 0.036014000  | -2.322289000 |
| H | -2.208765000 | 0.774713000  | -3.598665000 |
| H | -1.308158000 | 6.690654000  | -2.191522000 |
| H | -1.615641000 | 8.228270000  | -1.310689000 |
| H | 1.215486000  | 7.402236000  | -1.585585000 |
| H | 1.476669000  | 6.509760000  | 1.798731000  |
| H | 2.349739000  | 7.268630000  | 0.459426000  |
| H | -0.915331000 | 6.603791000  | 1.799343000  |
| H | -1.692531000 | 6.578593000  | 0.323997000  |
| H | 10.580783000 | -1.099242000 | -0.508842000 |
| H | 11.437101000 | 0.431536000  | -0.176880000 |
| H | 8.124785000  | -1.119095000 | 0.838105000  |
| H | 6.419860000  | 0.748342000  | 1.367316000  |
| H | 7.253024000  | 2.996688000  | 0.489115000  |
| H | 0.099345000  | 7.553940000  | 5.591292000  |
| H | -0.530176000 | 3.547962000  | 3.260214000  |
| H | -1.519045000 | 3.271927000  | 4.811467000  |
| H | -1.059826000 | 5.395526000  | 5.573238000  |
| H | 2.343205000  | 1.125453000  | 6.028453000  |
| H | 1.645015000  | 4.031008000  | 5.873733000  |
| H | 2.691468000  | 1.412829000  | -7.214008000 |
| H | 4.437989000  | 1.319112000  | -5.409120000 |
| H | 2.959516000  | 0.470336000  | -4.875435000 |
| H | 3.323087000  | 2.099690000  | -4.259677000 |
| H | 0.614697000  | 1.291296000  | -5.777212000 |
| H | 0.952403000  | 2.907004000  | -5.132168000 |
| H | 0.559860000  | 2.710174000  | -6.865433000 |
| H | 4.688708000  | 4.727720000  | -4.686868000 |
| H | 3.822893000  | 5.898979000  | -5.717820000 |
| H | 3.098756000  | 7.156475000  | -3.653182000 |
| H | 2.352372000  | 4.163752000  | -3.619819000 |
| H | 1.412466000  | 5.439358000  | -2.836266000 |
| H | 1.574494000  | 5.420813000  | -4.615951000 |
| H | 5.002667000  | 6.496839000  | -2.141631000 |
| H | 4.364628000  | 4.819008000  | -2.087821000 |
| H | 3.422259000  | 6.148487000  | -1.382578000 |
| H | -5.719735000 | -6.760919000 | 2.589452000  |
| H | -5.415131000 | -5.081406000 | 3.136018000  |
| H | 0.114421000  | -4.532012000 | -4.799619000 |
| H | -0.033733000 | -4.402204000 | -3.024389000 |
| H | 2.243411000  | -5.467713000 | -2.065952000 |
| H | 1.752154000  | -3.611751000 | -0.248695000 |
| H | 1.554238000  | -6.596346000 | 0.408249000  |
| H | 0.409892000  | -5.734134000 | -0.659933000 |

|   |              |              |              |
|---|--------------|--------------|--------------|
| H | -5.729759000 | 1.383322000  | 1.257032000  |
| H | -3.610650000 | 2.285666000  | 2.318073000  |
| H | -4.713210000 | 1.380185000  | 3.359221000  |
| H | -3.286833000 | -0.586155000 | 3.434118000  |
| H | -2.293290000 | 0.853458000  | 3.807709000  |
| H | 0.023684000  | -1.754621000 | 1.866469000  |
| H | -1.201085000 | -2.007020000 | 3.125489000  |
| H | -0.006923000 | -0.647811000 | 3.303513000  |
| H | -1.291373000 | 2.271366000  | 2.060485000  |
| H | -1.775786000 | 4.041809000  | 1.913479000  |
| H | 0.461213000  | 4.495667000  | 0.860283000  |
| H | -1.711828000 | 2.986959000  | -0.423730000 |
| H | -1.315227000 | 4.463041000  | -1.944867000 |
| H | -0.311392000 | 1.160759000  | -0.789833000 |
| H | -0.512370000 | 2.348134000  | -2.976586000 |
| H | 2.024993000  | 3.131730000  | -0.844439000 |
| H | 6.018928000  | 2.668040000  | -2.601917000 |
| H | 6.962440000  | -1.603949000 | -1.842756000 |
| H | 5.575757000  | -2.416755000 | -1.133249000 |
| H | 1.249478000  | -0.421364000 | 0.463227000  |
| H | 2.001618000  | -3.920039000 | 3.280199000  |
| H | 3.784525000  | -5.669535000 | -3.609799000 |
| H | 2.982896000  | 2.431371000  | 7.084268000  |
| H | 3.559470000  | 2.275354000  | 5.391140000  |
| H | 1.623532000  | -5.316384000 | 5.367344000  |
| H | -0.713539000 | -5.836013000 | -3.874627000 |
| H | -7.070090000 | -5.774192000 | 3.244923000  |
| H | -3.151020000 | -0.936082000 | -5.174269000 |
| H | -0.930655000 | 7.623750000  | 4.128607000  |
| H | 0.830335000  | 7.990797000  | 4.003865000  |
| H | -0.601209000 | 8.234912000  | -2.774789000 |
| H | 5.227692000  | 6.434967000  | -4.751868000 |
| H | 3.036388000  | 3.039035000  | -6.613434000 |
| H | -4.427871000 | 4.363137000  | -4.768264000 |
| H | -8.736719000 | 3.974186000  | 0.663179000  |
| H | -7.295664000 | 0.482781000  | -2.316764000 |
| H | -8.505880000 | 1.565120000  | -3.065175000 |
| H | -5.456145000 | 6.526688000  | 2.713512000  |
| H | 10.666334000 | 0.177838000  | -1.756839000 |
| H | -5.793853000 | -0.868340000 | 0.636741000  |
| H | 3.259312000  | -2.562158000 | 1.021260000  |
| H | -8.493238000 | 1.831116000  | -0.562590000 |
| H | -7.233176000 | 4.958168000  | 0.642879000  |
| H | -5.237685000 | -1.002394000 | 2.177868000  |

**PFL-AE-PC-HAA**

|   |              |              |              |
|---|--------------|--------------|--------------|
| C | -3.881671000 | -7.431020000 | 2.212228000  |
| S | -4.425952000 | -6.779200000 | 0.578059000  |
| C | 1.514616000  | -4.414320000 | -4.030528000 |
| S | -0.316758000 | -4.295125000 | -4.190578000 |
| C | 6.214135000  | -2.733159000 | -2.640145000 |
| C | 5.636281000  | -2.707783000 | -1.237037000 |
| O | 6.153142000  | -2.026865000 | -0.347063000 |
| C | 5.905711000  | -1.454279000 | -3.457820000 |
| C | 4.483889000  | -1.336407000 | -3.970085000 |
| C | 3.416603000  | -1.037999000 | -3.104103000 |
| C | 4.186259000  | -1.496682000 | -5.331818000 |
| C | 2.113107000  | -0.874991000 | -3.571185000 |
| C | 2.882233000  | -1.345698000 | -5.817749000 |
| C | 1.843070000  | -1.023389000 | -4.937409000 |
| O | 0.556228000  | -0.831403000 | -5.357121000 |
| N | 4.532739000  | -3.455193000 | -1.019255000 |
| C | 3.726731000  | -3.428525000 | 0.201749000  |
| C | 4.566233000  | -3.064411000 | 1.445948000  |
| O | 5.306002000  | -3.884273000 | 1.973687000  |
| C | 3.114069000  | -4.814802000 | 0.431386000  |
| S | 1.928972000  | -4.824598000 | 1.846696000  |
| N | 4.300581000  | -1.839957000 | 1.977819000  |
| C | 5.039923000  | -1.403514000 | 3.148808000  |
| C | 4.461448000  | -1.929141000 | 4.485786000  |
| O | 5.049194000  | -1.667862000 | 5.531961000  |
| C | 5.246210000  | 0.123974000  | 3.167557000  |
| C | 3.987700000  | 0.946639000  | 3.184460000  |
| C | 2.780962000  | 0.669907000  | 3.791998000  |
| N | 3.894317000  | 2.164580000  | 2.536107000  |
| C | 2.659942000  | 2.599463000  | 2.733216000  |
| N | 1.949413000  | 1.724163000  | 3.490456000  |
| N | 3.329177000  | -2.670781000 | 4.414040000  |
| C | 2.730686000  | -3.325765000 | 5.567012000  |
| C | 1.212782000  | -3.140760000 | 5.622932000  |
| C | 0.795136000  | -1.697527000 | 5.917836000  |
| N | -0.489043000 | -1.372278000 | 5.620144000  |
| O | 1.573728000  | -0.884915000 | 6.412322000  |
| C | -7.049800000 | 3.341101000  | 2.708357000  |
| C | -5.836817000 | 3.417034000  | 1.795035000  |
| O | -6.006284000 | 3.136463000  | 0.594882000  |
| O | -4.721479000 | 3.809839000  | 2.287098000  |
| C | -8.632007000 | 0.689981000  | -0.050989000 |
| C | -7.908208000 | 0.424088000  | -1.363839000 |
| O | -7.244500000 | 1.293531000  | -1.939584000 |
| N | -8.028340000 | -0.835962000 | -1.842497000 |

|    |              |              |              |
|----|--------------|--------------|--------------|
| C  | -7.457820000 | -1.296991000 | -3.095041000 |
| C  | -4.695652000 | 1.782635000  | -4.916609000 |
| C  | -3.545363000 | 2.267332000  | -4.039385000 |
| O  | -3.813194000 | 3.165528000  | -3.179031000 |
| O  | -2.423322000 | 1.727699000  | -4.181944000 |
| C  | -2.645450000 | -1.486575000 | -4.450484000 |
| N  | -1.575106000 | -1.133237000 | -3.491519000 |
| C  | -3.250583000 | 6.778556000  | -2.068767000 |
| N  | -3.885637000 | 7.101322000  | -0.799501000 |
| C  | -4.016535000 | 6.223633000  | 0.204219000  |
| N  | -4.670970000 | 6.578709000  | 1.332626000  |
| N  | -3.500298000 | 5.005887000  | 0.115845000  |
| C  | 9.591401000  | 4.360745000  | 0.378010000  |
| C  | 8.121094000  | 4.267503000  | 0.675199000  |
| C  | 7.446514000  | 3.269870000  | 1.357097000  |
| N  | 7.222401000  | 5.236732000  | 0.277834000  |
| C  | 6.041905000  | 4.820320000  | 0.703987000  |
| N  | 6.120743000  | 3.636444000  | 1.365599000  |
| S  | -1.967774000 | -4.189206000 | 1.913491000  |
| S  | -0.648939000 | -6.402838000 | -0.678003000 |
| S  | -3.218289000 | -4.078951000 | -1.752867000 |
| S  | 0.121974000  | -2.662465000 | -0.850192000 |
| Fe | -0.931597000 | -4.432152000 | -1.962227000 |
| Fe | -2.182694000 | -2.556481000 | 0.008280000  |
| Fe | -0.032387000 | -4.502180000 | 0.650037000  |
| Fe | -2.663819000 | -5.426000000 | 0.059156000  |
| N  | -4.230554000 | -2.018657000 | 0.787394000  |
| C  | -4.398065000 | -0.561458000 | 0.689021000  |
| C  | -3.704981000 | -0.076583000 | -0.609713000 |
| O  | -2.875747000 | -0.882202000 | -1.143681000 |
| C  | -3.867031000 | 0.156568000  | 1.954833000  |
| C  | -2.604472000 | -0.432488000 | 2.599666000  |
| S  | -1.217089000 | -0.521756000 | 1.409543000  |
| C  | 0.094348000  | -1.237009000 | 2.433823000  |
| C  | -0.932128000 | 3.308607000  | 1.750831000  |
| C  | -0.525337000 | 3.655268000  | 0.330564000  |
| O  | 0.873195000  | 3.374145000  | 0.171933000  |
| C  | -1.276085000 | 2.878156000  | -0.784401000 |
| O  | -1.755666000 | 3.813700000  | -1.731665000 |
| C  | -0.190060000 | 1.927557000  | -1.346459000 |
| O  | -0.273165000 | 1.552158000  | -2.690675000 |
| C  | 1.101305000  | 2.709204000  | -1.051252000 |
| O  | -3.989107000 | 1.044326000  | -1.043349000 |
| N  | 6.175605000  | 2.586255000  | -1.733654000 |
| C  | 5.245103000  | 3.453364000  | -2.136795000 |
| N  | 3.924553000  | 3.389813000  | -1.950457000 |



|    |              |              |              |
|----|--------------|--------------|--------------|
| C  | 3.568223000  | 2.300212000  | -1.263707000 |
| C  | 4.427592000  | 1.317742000  | -0.748416000 |
| C  | 5.810367000  | 1.503733000  | -1.015941000 |
| N  | 6.772416000  | 0.669204000  | -0.571494000 |
| N  | 3.692582000  | 0.355863000  | -0.069489000 |
| C  | 2.444625000  | 0.744234000  | -0.174108000 |
| N  | 2.292970000  | 1.904414000  | -0.904143000 |
| C  | -4.275209000 | 6.134340000  | 5.040518000  |
| C  | -3.274083000 | 5.059651000  | 5.418096000  |
| O  | -2.490547000 | 5.200897000  | 6.355880000  |
| N  | -3.316741000 | 3.951908000  | 4.606059000  |
| C  | -2.542443000 | 2.819552000  | 4.533339000  |
| C  | -1.264965000 | 2.427822000  | 5.116970000  |
| O  | -0.701293000 | 1.406153000  | 4.632645000  |
| N  | -0.707989000 | 3.126685000  | 6.122480000  |
| C  | 0.583460000  | 2.773725000  | 6.682375000  |
| C  | 2.117300000  | 3.150445000  | -6.340146000 |
| C  | 3.155091000  | 2.566018000  | -5.376448000 |
| C  | 0.705057000  | 2.612141000  | -6.085908000 |
| C  | 2.239828000  | 7.180400000  | -4.450294000 |
| C  | 1.201591000  | 6.732704000  | -3.408692000 |
| C  | 0.522972000  | 5.428913000  | -3.847744000 |
| C  | 1.830410000  | 6.570676000  | -2.016425000 |
| Na | -5.413536000 | 2.678158000  | -1.502970000 |
| H  | 6.598723000  | -1.437701000 | -4.315669000 |
| H  | 6.159527000  | -0.579199000 | -2.834972000 |
| H  | 3.605666000  | -0.919145000 | -2.036504000 |
| H  | 4.989612000  | -1.731454000 | -6.038134000 |
| H  | 1.303678000  | -0.618116000 | -2.885801000 |
| H  | 2.674424000  | -1.464508000 | -6.886362000 |
| H  | 0.476947000  | -0.993538000 | -6.312843000 |
| H  | 7.306683000  | -2.818825000 | -2.518488000 |
| H  | 5.834651000  | 0.401071000  | 2.275666000  |
| H  | 5.870753000  | 0.346892000  | 4.050666000  |
| H  | 2.457822000  | -0.148261000 | 4.426428000  |
| H  | 0.968945000  | 1.782751000  | 3.799503000  |
| H  | 2.228023000  | 3.503388000  | 2.308176000  |
| H  | 6.042804000  | -1.863049000 | 3.112878000  |
| H  | 0.801771000  | -3.783889000 | 6.423746000  |
| H  | 0.748832000  | -3.488855000 | 4.681725000  |
| H  | -0.707965000 | -0.372990000 | 5.535419000  |
| H  | -1.065828000 | -2.015795000 | 5.087600000  |
| H  | 3.196102000  | -2.890806000 | 6.461910000  |
| H  | -7.421374000 | 2.302052000  | 2.749604000  |
| H  | -6.844954000 | 3.703780000  | 3.728028000  |
| H  | -8.180047000 | 0.084113000  | 0.755742000  |

|   |              |              |              |
|---|--------------|--------------|--------------|
| H | -6.875651000 | -0.475723000 | -3.536629000 |
| H | -4.321843000 | 1.358475000  | -5.861936000 |
| H | -5.234045000 | 0.987243000  | -4.368083000 |
| H | -3.231860000 | -2.310789000 | -4.019091000 |
| H | -3.269677000 | -0.598550000 | -4.608930000 |
| H | -0.919218000 | -1.932136000 | -3.389897000 |
| H | -2.000078000 | -0.907438000 | -2.550697000 |
| H | -1.032314000 | -0.316670000 | -3.804531000 |
| H | -2.149086000 | 6.738828000  | -1.988015000 |
| H | -3.607507000 | 5.807516000  | -2.451766000 |
| H | -4.168843000 | 8.061031000  | -0.634742000 |
| H | -4.836729000 | 5.834887000  | 2.014205000  |
| H | -5.299303000 | 7.374882000  | 1.331800000  |
| H | -3.788079000 | 4.326694000  | 0.843946000  |
| H | -2.885133000 | 4.712954000  | -0.661114000 |
| H | 10.138552000 | 3.526118000  | 0.849620000  |
| H | 10.017095000 | 5.306252000  | 0.764345000  |
| H | 7.789368000  | 2.340101000  | 1.806039000  |
| H | 5.322889000  | 3.093751000  | 1.767180000  |
| H | 5.091018000  | 5.334290000  | 0.551205000  |
| H | -4.370086000 | 6.844812000  | 5.874704000  |
| H | -0.321053000 | 3.873675000  | 2.476118000  |
| H | -2.895349000 | 2.139637000  | 3.761020000  |
| H | -4.025802000 | 3.965372000  | 3.838763000  |
| H | 0.708153000  | 1.678164000  | 6.706370000  |
| H | -1.207439000 | 3.965693000  | 6.440388000  |
| H | 2.412287000  | 2.922985000  | -7.383381000 |
| H | 4.170518000  | 2.948152000  | -5.591026000 |
| H | 3.185990000  | 1.462823000  | -5.443693000 |
| H | 2.921689000  | 2.828251000  | -4.328943000 |
| H | 0.662209000  | 1.521209000  | -6.251954000 |
| H | 0.385874000  | 2.778601000  | -5.042251000 |
| H | -0.040178000 | 3.089466000  | -6.748933000 |
| H | 3.061672000  | 6.441292000  | -4.517652000 |
| H | 1.783698000  | 7.261182000  | -5.454720000 |
| H | 0.422661000  | 7.519299000  | -3.343298000 |
| H | 1.273379000  | 4.624550000  | -3.944233000 |
| H | -0.235355000 | 5.087830000  | -3.121078000 |
| H | 0.032253000  | 5.537650000  | -4.832859000 |
| H | 2.307213000  | 7.508410000  | -1.674234000 |
| H | 2.598053000  | 5.773848000  | -2.024730000 |
| H | 1.069096000  | 6.281036000  | -1.267347000 |
| H | -2.973544000 | -8.048465000 | 2.106293000  |
| H | -3.663772000 | -6.601101000 | 2.904602000  |
| H | 1.988894000  | -4.041548000 | -4.953451000 |
| H | 1.861852000  | -3.798151000 | -3.184953000 |

|   |              |              |              |
|---|--------------|--------------|--------------|
| H | 4.126763000  | -3.951420000 | -1.806962000 |
| H | 2.911988000  | -2.695664000 | 0.072983000  |
| H | 3.930727000  | -5.520800000 | 0.650649000  |
| H | 2.599148000  | -5.153476000 | -0.483285000 |
| H | -5.459260000 | -0.275792000 | 0.579574000  |
| H | -3.721534000 | 1.221718000  | 1.705923000  |
| H | -4.657270000 | 0.128712000  | 2.726747000  |
| H | -2.779789000 | -1.459285000 | 2.962117000  |
| H | -2.275978000 | 0.185868000  | 3.447705000  |
| H | 0.973685000  | -1.369907000 | 1.787366000  |
| H | -0.213434000 | -2.230040000 | 2.791684000  |
| H | 0.327159000  | -0.561522000 | 3.264211000  |
| H | -0.801185000 | 2.232348000  | 1.945185000  |
| H | -1.987443000 | 3.569153000  | 1.923780000  |
| H | -0.682150000 | 4.731960000  | 0.141975000  |
| H | -2.115384000 | 2.290721000  | -0.378430000 |
| H | -2.508059000 | 3.445021000  | -2.308515000 |
| H | -0.208221000 | 1.026272000  | -0.708214000 |
| H | -1.122574000 | 1.831986000  | -3.141047000 |
| H | 1.299015000  | 3.418562000  | -1.872477000 |
| H | 5.612305000  | 4.325301000  | -2.692392000 |
| H | 7.717986000  | 0.873959000  | -0.880202000 |
| H | 6.546947000  | -0.304179000 | -0.333719000 |
| H | 1.591079000  | 0.220810000  | 0.252870000  |
| H | 2.960057000  | -2.911863000 | 3.493724000  |
| H | 5.860232000  | -3.617238000 | -3.184451000 |
| H | 0.651512000  | 3.175333000  | 7.705934000  |
| H | 1.414989000  | 3.193420000  | 6.083567000  |
| H | 2.957307000  | -4.411368000 | 5.552070000  |
| H | 1.804171000  | -5.464887000 | -3.866336000 |
| H | -4.690614000 | -8.053966000 | 2.630729000  |
| H | -2.189860000 | -1.811403000 | -5.395847000 |
| H | -5.264406000 | 5.710455000  | 4.796119000  |
| H | -3.913907000 | 6.680853000  | 4.149657000  |
| H | -3.535073000 | 7.556028000  | -2.785797000 |
| H | 2.688255000  | 8.163929000  | -4.208565000 |
| H | 2.122410000  | 4.256103000  | -6.260078000 |
| H | -5.414562000 | 2.593276000  | -5.119554000 |
| H | -9.706090000 | 0.419276000  | -0.112137000 |
| H | -6.793721000 | -2.164197000 | -2.938839000 |
| H | -8.254587000 | -1.595911000 | -3.798556000 |
| H | -7.832803000 | 3.952880000  | 2.230076000  |
| H | 9.814850000  | 4.333893000  | -0.709479000 |
| H | -4.840562000 | -2.502726000 | 0.122806000  |
| H | 3.955302000  | -1.111999000 | 1.337134000  |
| H | -8.603024000 | -1.490558000 | -1.321174000 |

|   |              |              |             |
|---|--------------|--------------|-------------|
| H | -8.520667000 | 1.751816000  | 0.210885000 |
| H | -4.451570000 | -2.384075000 | 1.716053000 |

**LAM-TS-HAA**

|   |               |              |               |
|---|---------------|--------------|---------------|
| C | -50.924494000 | 14.276430000 | -69.034303000 |
| S | -49.633313000 | 15.554152000 | -68.708633000 |
| C | -50.241347000 | 10.728396000 | -62.742584000 |
| S | -49.953466000 | 10.482787000 | -64.548098000 |
| C | -48.731668000 | 11.707265000 | -58.096225000 |
| C | -48.204549000 | 10.511829000 | -58.845242000 |
| C | -47.522846000 | 10.486105000 | -60.052641000 |
| N | -48.311266000 | 9.226143000  | -58.352245000 |
| C | -47.712542000 | 8.452192000  | -59.241706000 |
| N | -47.216871000 | 9.162495000  | -60.288882000 |
| C | -49.079849000 | 15.402187000 | -61.182845000 |
| S | -47.706661000 | 16.152657000 | -62.162065000 |
| C | -44.665428000 | 16.962165000 | -59.793722000 |
| C | -43.254482000 | 17.401703000 | -59.435215000 |
| O | -44.627996000 | 16.232701000 | -61.008138000 |
| C | -43.798270000 | 18.917754000 | -63.570640000 |
| N | -43.361189000 | 18.450500000 | -64.877687000 |
| C | -42.185617000 | 17.855778000 | -65.132124000 |
| N | -41.359523000 | 17.510294000 | -64.130267000 |
| N | -41.791132000 | 17.631942000 | -66.387924000 |
| C | -40.329044000 | 16.370704000 | -70.075565000 |
| O | -40.983126000 | 16.148826000 | -68.847194000 |
| C | -44.243355000 | 7.352695000  | -66.041873000 |
| C | -44.876645000 | 7.891976000  | -64.792965000 |
| C | -45.182467000 | 7.342985000  | -63.558383000 |
| N | -45.389097000 | 9.172306000  | -64.743706000 |
| C | -45.965991000 | 9.347871000  | -63.529552000 |
| N | -45.863504000 | 8.260982000  | -62.780828000 |
| C | -38.938710000 | 6.511224000  | -63.495471000 |
| C | -38.904342000 | 7.998240000  | -63.837753000 |
| C | -37.555852000 | 8.417444000  | -64.459302000 |
| C | -37.551660000 | 9.851988000  | -64.961566000 |
| N | -38.052107000 | 10.049513000 | -66.200968000 |
| O | -37.136717000 | 10.801796000 | -64.289053000 |
| C | -43.232511000 | 8.208770000  | -58.736461000 |
| C | -43.848801000 | 7.437984000  | -59.907951000 |
| C | -44.204723000 | 9.218306000  | -58.118724000 |
| C | -39.305592000 | 9.941972000  | -57.449955000 |
| C | -38.561462000 | 10.477671000 | -58.651487000 |
| C | -38.816013000 | 9.991871000  | -59.944455000 |
| C | -37.548426000 | 11.444234000 | -58.515802000 |
| C | -38.082711000 | 10.439160000 | -61.046242000 |

|    |               |              |               |
|----|---------------|--------------|---------------|
| C  | -36.794440000 | 11.888477000 | -59.604121000 |
| C  | -37.053310000 | 11.379361000 | -60.884780000 |
| O  | -36.308658000 | 11.820294000 | -61.930433000 |
| C  | -42.448605000 | 15.514596000 | -55.359390000 |
| C  | -41.262062000 | 15.021833000 | -56.205106000 |
| O  | -40.447724000 | 14.215640000 | -55.714002000 |
| O  | -41.245820000 | 15.459180000 | -57.403335000 |
| C  | -36.760024000 | 15.335108000 | -56.460462000 |
| C  | -36.337208000 | 14.809614000 | -57.849881000 |
| O  | -35.232894000 | 14.241296000 | -57.955563000 |
| O  | -37.175880000 | 14.992027000 | -58.789102000 |
| N  | -45.045793000 | 13.387518000 | -68.060619000 |
| C  | -43.759218000 | 12.671336000 | -68.024535000 |
| C  | -43.903750000 | 11.394660000 | -67.156575000 |
| O  | -42.950052000 | 10.593179000 | -67.167186000 |
| C  | -42.616232000 | 13.579906000 | -67.530157000 |
| C  | -42.937388000 | 14.530757000 | -66.370277000 |
| S  | -43.777595000 | 13.697191000 | -64.972490000 |
| C  | -44.016452000 | 15.068064000 | -63.815703000 |
| C  | -40.501182000 | 12.179255000 | -64.824211000 |
| C  | -40.829883000 | 11.174375000 | -63.773741000 |
| O  | -41.162242000 | 11.832870000 | -62.543329000 |
| C  | -42.082279000 | 10.308154000 | -64.040160000 |
| O  | -41.921432000 | 9.333851000  | -65.024147000 |
| C  | -42.391283000 | 9.775226000  | -62.632496000 |
| O  | -41.599887000 | 8.634418000  | -62.360719000 |
| C  | -41.953264000 | 10.976487000 | -61.741063000 |
| O  | -44.985391000 | 11.271118000 | -66.499720000 |
| N  | -43.830115000 | 13.159813000 | -57.484227000 |
| C  | -42.643359000 | 12.587471000 | -57.735190000 |
| N  | -42.204253000 | 12.076944000 | -58.889173000 |
| C  | -43.112191000 | 12.189497000 | -59.866544000 |
| C  | -44.365891000 | 12.806684000 | -59.761931000 |
| C  | -44.715004000 | 13.303250000 | -58.485458000 |
| N  | -45.913344000 | 13.885928000 | -58.248910000 |
| N  | -45.046422000 | 12.744046000 | -60.958743000 |
| C  | -44.240891000 | 12.098628000 | -61.765927000 |
| N  | -43.051334000 | 11.723269000 | -61.165896000 |
| S  | -49.990721000 | 14.461186000 | -64.966016000 |
| S  | -48.180537000 | 12.346953000 | -67.315774000 |
| S  | -46.894356000 | 12.670998000 | -63.862713000 |
| S  | -46.714699000 | 15.666246000 | -66.145412000 |
| Fe | -46.093665000 | 13.171606000 | -66.100961000 |
| Fe | -47.725051000 | 14.896768000 | -64.147067000 |
| Fe | -48.632656000 | 14.594705000 | -66.886836000 |
| Fe | -48.828908000 | 12.409341000 | -65.086245000 |

|   |               |              |               |
|---|---------------|--------------|---------------|
| C | -35.786820000 | 15.168751000 | -65.263595000 |
| N | -36.990275000 | 15.428468000 | -64.963178000 |
| C | -38.011207000 | 14.435260000 | -65.286813000 |
| C | -39.107488000 | 15.096561000 | -66.165898000 |
| O | -39.643992000 | 16.150133000 | -65.722780000 |
| C | -38.538410000 | 13.828289000 | -63.986983000 |
| C | -39.243866000 | 14.693920000 | -62.951806000 |
| C | -39.098056000 | 14.091860000 | -61.546344000 |
| C | -40.001602000 | 14.726636000 | -60.493416000 |
| N | -39.708098000 | 14.194798000 | -59.135634000 |
| O | -39.379475000 | 14.551996000 | -67.260910000 |
| H | -48.942981000 | 12.542583000 | -58.787468000 |
| H | -47.992723000 | 12.080136000 | -57.361406000 |
| H | -47.212183000 | 11.280823000 | -60.729362000 |
| H | -46.712565000 | 8.767727000  | -61.107900000 |
| H | -47.609713000 | 7.367177000  | -59.178600000 |
| H | -45.326605000 | 17.850279000 | -59.891604000 |
| H | -43.269269000 | 18.060884000 | -58.548076000 |
| H | -42.613278000 | 16.539057000 | -59.185246000 |
| H | -42.801324000 | 17.959663000 | -60.276133000 |
| H | -45.553298000 | 16.039071000 | -61.289200000 |
| H | -44.306992000 | 18.129963000 | -62.982417000 |
| H | -42.937298000 | 19.294471000 | -62.993410000 |
| H | -43.987669000 | 18.595240000 | -65.662204000 |
| H | -41.691362000 | 17.478433000 | -63.173571000 |
| H | -40.524835000 | 16.959549000 | -64.391396000 |
| H | -40.954529000 | 17.029703000 | -66.516582000 |
| H | -42.395344000 | 17.812046000 | -67.180575000 |
| H | -39.399371000 | 16.970724000 | -69.962434000 |
| H | -40.054436000 | 15.424083000 | -70.589310000 |
| H | -40.414236000 | 15.560831000 | -68.272415000 |
| H | -43.752227000 | 8.167241000  | -66.597715000 |
| H | -45.004437000 | 6.904844000  | -66.710116000 |
| H | -44.947828000 | 6.342610000  | -63.192543000 |
| H | -46.451336000 | 10.283727000 | -63.252071000 |
| H | -39.093912000 | 8.583615000  | -62.927722000 |
| H | -39.736033000 | 8.244249000  | -64.517827000 |
| H | -36.752487000 | 8.331757000  | -63.709045000 |
| H | -37.309646000 | 7.737332000  | -65.295592000 |
| H | -38.134821000 | 11.000429000 | -66.551310000 |
| H | -38.456507000 | 9.296875000  | -66.747763000 |
| H | -38.067973000 | 6.206324000  | -62.885977000 |
| H | -42.325279000 | 8.745852000  | -59.077688000 |
| H | -44.200370000 | 8.117336000  | -60.704782000 |
| H | -44.732979000 | 6.860134000  | -59.579814000 |
| H | -43.135086000 | 6.718124000  | -60.352122000 |

|   |               |              |               |
|---|---------------|--------------|---------------|
| H | -43.734459000 | 9.783322000  | -57.294580000 |
| H | -45.107674000 | 8.716414000  | -57.724546000 |
| H | -44.544773000 | 9.950142000  | -58.873790000 |
| H | -39.409050000 | 10.711979000 | -56.664460000 |
| H | -40.318950000 | 9.598299000  | -57.723048000 |
| H | -39.603592000 | 9.247090000  | -60.103221000 |
| H | -37.331759000 | 11.868400000 | -57.528802000 |
| H | -38.304804000 | 10.071267000 | -62.047225000 |
| H | -36.029994000 | 12.654594000 | -59.454169000 |
| H | -36.588195000 | 11.370391000 | -62.767344000 |
| H | -42.555577000 | 16.611079000 | -55.443251000 |
| H | -43.361969000 | 15.056118000 | -55.778724000 |
| H | -37.104392000 | 16.382362000 | -56.542866000 |
| H | -37.626550000 | 14.750839000 | -56.094563000 |
| H | -51.790217000 | 14.418863000 | -68.364860000 |
| H | -50.512631000 | 13.267278000 | -68.868955000 |
| H | -49.864092000 | 9.857277000  | -62.179922000 |
| H | -49.712065000 | 11.623941000 | -62.377784000 |
| H | -49.471225000 | 16.148469000 | -60.470080000 |
| H | -49.894097000 | 15.091553000 | -61.858517000 |
| H | -44.942714000 | 14.354007000 | -68.378454000 |
| H | -43.469710000 | 12.311158000 | -69.027881000 |
| H | -41.765280000 | 12.934628000 | -67.268830000 |
| H | -42.274269000 | 14.225954000 | -68.355223000 |
| H | -42.000830000 | 14.979930000 | -66.006887000 |
| H | -43.605692000 | 15.346893000 | -66.691127000 |
| H | -44.668162000 | 14.687856000 | -63.016917000 |
| H | -43.053238000 | 15.375773000 | -63.382127000 |
| H | -44.514993000 | 15.910100000 | -64.319508000 |
| H | -41.277639000 | 12.939513000 | -64.956361000 |
| H | -40.172314000 | 11.729662000 | -65.768749000 |
| H | -39.972682000 | 10.497848000 | -63.611885000 |
| H | -42.900699000 | 11.001485000 | -64.307640000 |
| H | -42.295554000 | 9.710976000  | -65.863271000 |
| H | -43.461610000 | 9.540429000  | -62.504511000 |
| H | -41.912799000 | 8.234139000  | -61.533044000 |
| H | -41.361249000 | 10.611085000 | -60.887079000 |
| H | -41.946016000 | 12.549855000 | -56.891554000 |
| H | -46.088295000 | 14.320290000 | -57.349738000 |
| H | -46.523348000 | 14.103054000 | -59.028847000 |
| H | -44.464783000 | 11.862870000 | -62.805599000 |
| H | -35.468118000 | 14.234390000 | -65.774745000 |
| H | -37.583348000 | 13.606029000 | -65.885748000 |
| H | -37.765609000 | 13.184728000 | -63.543321000 |
| H | -38.828759000 | 15.719352000 | -62.969711000 |
| H | -40.316072000 | 14.791617000 | -63.214576000 |

|   |               |              |               |
|---|---------------|--------------|---------------|
| H | -38.052070000 | 14.186008000 | -61.207066000 |
| H | -39.324570000 | 13.014278000 | -61.591979000 |
| H | -39.852473000 | 15.818721000 | -60.441152000 |
| H | -41.067947000 | 14.544330000 | -60.714343000 |
| H | -40.329016000 | 14.681584000 | -58.376033000 |
| H | -45.702485000 | 12.932881000 | -68.700606000 |
| H | -39.872797000 | 13.179531000 | -59.089038000 |
| H | -38.688741000 | 14.408797000 | -58.894994000 |
| H | -39.433244000 | 12.938670000 | -64.388116000 |
| H | -45.261635000 | 9.917208000  | -65.461722000 |
| H | -41.004642000 | 16.930453000 | -70.758079000 |
| H | -51.261445000 | 14.357691000 | -70.081835000 |
| H | -51.322547000 | 10.844280000 | -62.551678000 |
| H | -49.661433000 | 11.476900000 | -57.534185000 |
| H | -39.853141000 | 6.232424000  | -62.953207000 |
| H | -38.768322000 | 9.078831000  | -57.002348000 |
| H | -35.930633000 | 15.274698000 | -55.730126000 |
| H | -42.887680000 | 7.489097000  | -57.966148000 |
| H | -42.364056000 | 15.224441000 | -54.297067000 |
| H | -45.073855000 | 16.339053000 | -58.968303000 |
| H | -43.482253000 | 6.576170000  | -65.842482000 |
| H | -44.475173000 | 19.767704000 | -63.736606000 |
| H | -38.950924000 | 5.911438000  | -64.412646000 |
| H | -48.749520000 | 14.517925000 | -60.609720000 |
| H | -34.992649000 | 15.891093000 | -65.010005000 |

#### LAM-PC-HAA

|   |               |              |               |
|---|---------------|--------------|---------------|
| C | -50.998405000 | 14.292158000 | -69.012696000 |
| S | -49.714961000 | 15.560687000 | -68.630688000 |
| C | -50.283239000 | 10.523426000 | -62.737083000 |
| S | -49.979078000 | 10.393330000 | -64.549613000 |
| C | -48.730054000 | 11.706555000 | -58.093704000 |
| C | -48.207625000 | 10.511249000 | -58.846081000 |
| C | -47.513880000 | 10.485708000 | -60.046961000 |
| N | -48.333615000 | 9.223971000  | -58.362475000 |
| C | -47.734244000 | 8.449124000  | -59.250889000 |
| N | -47.220205000 | 9.160281000  | -60.288200000 |
| C | -49.042313000 | 15.464093000 | -61.098095000 |
| S | -47.690552000 | 16.155945000 | -62.145542000 |
| C | -44.648873000 | 16.958192000 | -59.788717000 |
| C | -43.241129000 | 17.388807000 | -59.405991000 |
| O | -44.597927000 | 16.229657000 | -61.003472000 |
| C | -43.768267000 | 18.934162000 | -63.637221000 |
| N | -43.432959000 | 18.492977000 | -64.981935000 |
| C | -42.310988000 | 17.835226000 | -65.313190000 |
| N | -41.433778000 | 17.461054000 | -64.373446000 |



|   |               |              |               |
|---|---------------|--------------|---------------|
| N | -42.032986000 | 17.591576000 | -66.602304000 |
| C | -40.236798000 | 16.469811000 | -70.098324000 |
| O | -40.861364000 | 15.942306000 | -68.948397000 |
| C | -44.305362000 | 7.287090000  | -66.041946000 |
| C | -44.922538000 | 7.844206000  | -64.792002000 |
| C | -45.210401000 | 7.311202000  | -63.545987000 |
| N | -45.433830000 | 9.125005000  | -64.751031000 |
| C | -45.990882000 | 9.317338000  | -63.530688000 |
| N | -45.878412000 | 8.239734000  | -62.769993000 |
| C | -38.953023000 | 6.532466000  | -63.508902000 |
| C | -38.979540000 | 8.014566000  | -63.874287000 |
| C | -37.650895000 | 8.492400000  | -64.497807000 |
| C | -37.726229000 | 9.923812000  | -65.003889000 |
| N | -38.216151000 | 10.090159000 | -66.250533000 |
| O | -37.391103000 | 10.899178000 | -64.320809000 |
| C | -43.242566000 | 8.214531000  | -58.726439000 |
| C | -43.845070000 | 7.450858000  | -59.909614000 |
| C | -44.231619000 | 9.199488000  | -58.096242000 |
| C | -39.290365000 | 9.964617000  | -57.422046000 |
| C | -38.570114000 | 10.486851000 | -58.643281000 |
| C | -38.869086000 | 10.004993000 | -59.928176000 |
| C | -37.541038000 | 11.439689000 | -58.538038000 |
| C | -38.168368000 | 10.446715000 | -61.052866000 |
| C | -36.820122000 | 11.880217000 | -59.649846000 |
| C | -37.126600000 | 11.380108000 | -60.923975000 |
| O | -36.419580000 | 11.824179000 | -61.991487000 |
| C | -42.456641000 | 15.443655000 | -55.376977000 |
| C | -41.288864000 | 14.881467000 | -56.208969000 |
| O | -40.472415000 | 14.103767000 | -55.677984000 |
| O | -41.291708000 | 15.238535000 | -57.433890000 |
| C | -36.782296000 | 15.334414000 | -56.434464000 |
| C | -36.406180000 | 14.809724000 | -57.838327000 |
| O | -35.314053000 | 14.224771000 | -57.976473000 |
| O | -37.269599000 | 15.012521000 | -58.750060000 |
| N | -45.204675000 | 13.334758000 | -68.083674000 |
| C | -43.917374000 | 12.619316000 | -68.080784000 |
| C | -44.037142000 | 11.349077000 | -67.199028000 |
| O | -43.082531000 | 10.548589000 | -67.224391000 |
| C | -42.767608000 | 13.533352000 | -67.612977000 |
| C | -43.074470000 | 14.486514000 | -66.452879000 |
| S | -43.870654000 | 13.661312000 | -65.026299000 |
| C | -44.049742000 | 15.043225000 | -63.870056000 |
| C | -40.586405000 | 12.115173000 | -64.998469000 |
| C | -40.914481000 | 11.158629000 | -63.877344000 |
| O | -41.200875000 | 11.860496000 | -62.658424000 |
| C | -42.175694000 | 10.309451000 | -64.089520000 |

|    |               |              |               |
|----|---------------|--------------|---------------|
| O  | -42.042896000 | 9.314036000  | -65.060763000 |
| C  | -42.450306000 | 9.807242000  | -62.664509000 |
| O  | -41.670978000 | 8.657195000  | -62.394706000 |
| C  | -41.964172000 | 11.018965000 | -61.809936000 |
| O  | -45.100627000 | 11.229775000 | -66.512857000 |
| N  | -43.793923000 | 13.016094000 | -57.440704000 |
| C  | -42.614807000 | 12.444839000 | -57.725990000 |
| N  | -42.183965000 | 11.993419000 | -58.906747000 |
| C  | -43.091755000 | 12.169377000 | -59.874248000 |
| C  | -44.340996000 | 12.788499000 | -59.732446000 |
| C  | -44.678200000 | 13.225196000 | -58.430486000 |
| N  | -45.863318000 | 13.819573000 | -58.160525000 |
| N  | -45.030959000 | 12.783041000 | -60.926285000 |
| C  | -44.233672000 | 12.171911000 | -61.767687000 |
| N  | -43.037682000 | 11.771931000 | -61.196881000 |
| S  | -50.069991000 | 14.426380000 | -64.885746000 |
| S  | -48.299157000 | 12.316081000 | -67.258681000 |
| S  | -46.952872000 | 12.635711000 | -63.824950000 |
| S  | -46.808502000 | 15.631166000 | -66.099572000 |
| Fe | -46.196788000 | 13.135924000 | -66.086406000 |
| Fe | -47.793225000 | 14.853989000 | -64.096969000 |
| Fe | -48.732597000 | 14.563908000 | -66.821060000 |
| Fe | -48.908860000 | 12.371872000 | -65.015464000 |
| C  | -36.474162000 | 17.047130000 | -65.198774000 |
| N  | -37.601334000 | 16.570532000 | -64.873791000 |
| C  | -37.885525000 | 15.169909000 | -65.204477000 |
| C  | -39.057566000 | 15.188348000 | -66.251469000 |
| O  | -40.120958000 | 15.753220000 | -65.875367000 |
| C  | -38.226235000 | 14.397994000 | -63.962588000 |
| C  | -39.248140000 | 14.833332000 | -62.959282000 |
| C  | -39.050898000 | 14.150565000 | -61.597215000 |
| C  | -40.057969000 | 14.593939000 | -60.538045000 |
| N  | -39.731527000 | 14.033329000 | -59.198687000 |
| O  | -38.867502000 | 14.675695000 | -67.373086000 |
| H  | -48.936980000 | 12.545843000 | -58.781608000 |
| H  | -47.990582000 | 12.072553000 | -57.355930000 |
| H  | -47.188480000 | 11.281293000 | -60.716042000 |
| H  | -46.713852000 | 8.762785000  | -61.105186000 |
| H  | -47.644039000 | 7.362648000  | -59.193683000 |
| H  | -45.302488000 | 17.850906000 | -59.896036000 |
| H  | -43.269425000 | 18.055430000 | -58.524540000 |
| H  | -42.611743000 | 16.522267000 | -59.138382000 |
| H  | -42.767338000 | 17.937595000 | -60.241546000 |
| H  | -45.520737000 | 16.030922000 | -61.288575000 |
| H  | -44.215214000 | 18.129875000 | -63.020952000 |
| H  | -42.871494000 | 19.323687000 | -63.126318000 |

|   |               |              |               |
|---|---------------|--------------|---------------|
| H | -44.116293000 | 18.654081000 | -65.713953000 |
| H | -41.701158000 | 17.466825000 | -63.396077000 |
| H | -40.671937000 | 16.821299000 | -64.688241000 |
| H | -41.305985000 | 16.896006000 | -66.826457000 |
| H | -42.704160000 | 17.825466000 | -67.324567000 |
| H | -39.490072000 | 17.256710000 | -69.854847000 |
| H | -39.717986000 | 15.688939000 | -70.694701000 |
| H | -40.194394000 | 15.435475000 | -68.411604000 |
| H | -43.894946000 | 8.104528000  | -66.656407000 |
| H | -45.059304000 | 6.755717000  | -66.654584000 |
| H | -44.971251000 | 6.315412000  | -63.170594000 |
| H | -46.467477000 | 10.258886000 | -63.256863000 |
| H | -39.198824000 | 8.602989000  | -62.973084000 |
| H | -39.819331000 | 8.216022000  | -64.559168000 |
| H | -36.845895000 | 8.451493000  | -63.745471000 |
| H | -37.370051000 | 7.821255000  | -65.330175000 |
| H | -38.379531000 | 11.033614000 | -66.592379000 |
| H | -38.567284000 | 9.312609000  | -66.799328000 |
| H | -38.067968000 | 6.272072000  | -62.899419000 |
| H | -42.344093000 | 8.771775000  | -59.057590000 |
| H | -44.206981000 | 8.135238000  | -60.697452000 |
| H | -44.720372000 | 6.854321000  | -59.591148000 |
| H | -43.119505000 | 6.748607000  | -60.362698000 |
| H | -43.775662000 | 9.751358000  | -57.255535000 |
| H | -45.132791000 | 8.679596000  | -57.721601000 |
| H | -44.572093000 | 9.944409000  | -58.838352000 |
| H | -39.340182000 | 10.730536000 | -56.627409000 |
| H | -40.323936000 | 9.660368000  | -57.663996000 |
| H | -39.669398000 | 9.268957000  | -60.061368000 |
| H | -37.288365000 | 11.862303000 | -57.559143000 |
| H | -38.431300000 | 10.085659000 | -62.046713000 |
| H | -36.048671000 | 12.643049000 | -59.520387000 |
| H | -36.748484000 | 11.401149000 | -62.825344000 |
| H | -42.549955000 | 16.533855000 | -55.531128000 |
| H | -43.382635000 | 14.973885000 | -55.753920000 |
| H | -37.131999000 | 16.380740000 | -56.504358000 |
| H | -37.634704000 | 14.746347000 | -56.042433000 |
| H | -51.905306000 | 14.459511000 | -68.406466000 |
| H | -50.612483000 | 13.281245000 | -68.802043000 |
| H | -50.123163000 | 9.538904000  | -62.264485000 |
| H | -49.590817000 | 11.243927000 | -62.271054000 |
| H | -49.303372000 | 16.192748000 | -60.311262000 |
| H | -49.934794000 | 15.270512000 | -61.716277000 |
| H | -45.111908000 | 14.297489000 | -68.415698000 |
| H | -43.653811000 | 12.254136000 | -69.089500000 |
| H | -41.914550000 | 12.887093000 | -67.358926000 |

|   |               |              |               |
|---|---------------|--------------|---------------|
| H | -42.430496000 | 14.173069000 | -68.446757000 |
| H | -42.130337000 | 14.935591000 | -66.113859000 |
| H | -43.758832000 | 15.292935000 | -66.763976000 |
| H | -44.680480000 | 14.682707000 | -63.045605000 |
| H | -43.065078000 | 15.336407000 | -63.476058000 |
| H | -44.550190000 | 15.890420000 | -64.363695000 |
| H | -41.311085000 | 12.939282000 | -65.014985000 |
| H | -40.650660000 | 11.566653000 | -65.952496000 |
| H | -40.066522000 | 10.474822000 | -63.709851000 |
| H | -42.997200000 | 11.001299000 | -64.352355000 |
| H | -42.438218000 | 9.673313000  | -65.897153000 |
| H | -43.519240000 | 9.594038000  | -62.495746000 |
| H | -41.962594000 | 8.283279000  | -61.547300000 |
| H | -41.339631000 | 10.658968000 | -60.977310000 |
| H | -41.916732000 | 12.352447000 | -56.887367000 |
| H | -46.041200000 | 14.187680000 | -57.233059000 |
| H | -46.489538000 | 14.059395000 | -58.920129000 |
| H | -44.470455000 | 11.973360000 | -62.812276000 |
| H | -35.682624000 | 16.462641000 | -65.715490000 |
| H | -37.025757000 | 14.688100000 | -65.709160000 |
| H | -37.778001000 | 13.405954000 | -63.851134000 |
| H | -39.213361000 | 15.934281000 | -62.847246000 |
| H | -40.269939000 | 14.604886000 | -63.336732000 |
| H | -38.037354000 | 14.357703000 | -61.214013000 |
| H | -39.132311000 | 13.058957000 | -61.727402000 |
| H | -40.053923000 | 15.691403000 | -60.424622000 |
| H | -41.084948000 | 14.288206000 | -60.801603000 |
| H | -40.372217000 | 14.466164000 | -58.425314000 |
| H | -45.881882000 | 12.872628000 | -68.696141000 |
| H | -39.837774000 | 13.009642000 | -59.180102000 |
| H | -38.730409000 | 14.298898000 | -58.944214000 |
| H | -39.574746000 | 12.532918000 | -64.894435000 |
| H | -45.323081000 | 9.863179000  | -65.478382000 |
| H | -41.004679000 | 16.930491000 | -70.758101000 |
| H | -51.261440000 | 14.357686000 | -70.081832000 |
| H | -51.322543000 | 10.844267000 | -62.551678000 |
| H | -49.661444000 | 11.476913000 | -57.534187000 |
| H | -39.853092000 | 6.232451000  | -62.953189000 |
| H | -38.768231000 | 9.078862000  | -57.002306000 |
| H | -35.930643000 | 15.274696000 | -55.730132000 |
| H | -42.887765000 | 7.489058000  | -57.966180000 |
| H | -42.364083000 | 15.224448000 | -54.297012000 |
| H | -45.073837000 | 16.339038000 | -58.968304000 |
| H | -43.482263000 | 6.576154000  | -65.842491000 |
| H | -44.475113000 | 19.767745000 | -63.736656000 |
| H | -38.950953000 | 5.911395000  | -64.412663000 |

|   |               |              |               |
|---|---------------|--------------|---------------|
| H | -48.749537000 | 14.517901000 | -60.609698000 |
| H | -36.239403000 | 18.099087000 | -64.963302000 |

**PFL-AE-decay-TS**

|   |               |               |              |
|---|---------------|---------------|--------------|
| C | -6.721690000  | -39.019421000 | 19.353751000 |
| S | -5.422834000  | -37.837959000 | 18.797478000 |
| C | -2.147193000  | -34.052550000 | 24.859755000 |
| S | -1.933616000  | -33.952249000 | 23.032422000 |
| C | -4.164899000  | -32.648534000 | 29.366447000 |
| C | -5.467050000  | -33.045259000 | 28.698888000 |
| O | -6.550160000  | -32.609036000 | 29.096944000 |
| C | -3.710496000  | -31.211243000 | 29.010044000 |
| C | -3.194124000  | -31.012289000 | 27.597929000 |
| C | -4.068144000  | -31.013907000 | 26.495714000 |
| C | -1.834100000  | -30.779854000 | 27.343715000 |
| C | -3.620519000  | -30.766040000 | 25.198753000 |
| C | -1.364347000  | -30.537127000 | 26.047083000 |
| C | -2.260573000  | -30.520082000 | 24.972060000 |
| O | -1.866500000  | -30.256563000 | 23.689247000 |
| N | -5.375095000  | -33.885035000 | 27.645385000 |
| C | -6.487801000  | -34.248662000 | 26.771046000 |
| C | -7.833573000  | -34.260323000 | 27.526751000 |
| O | -8.113758000  | -35.160981000 | 28.306911000 |
| C | -6.241128000  | -35.655321000 | 26.213337000 |
| S | -7.543697000  | -36.171679000 | 25.016249000 |
| N | -8.712023000  | -33.296892000 | 27.137888000 |
| C | -10.033617000 | -33.241229000 | 27.736255000 |
| C | -11.078492000 | -34.134338000 | 27.023367000 |
| O | -12.238409000 | -34.148965000 | 27.430483000 |
| C | -10.533740000 | -31.798387000 | 27.912959000 |
| C | -10.624433000 | -30.993624000 | 26.647235000 |
| C | -10.875831000 | -31.410777000 | 25.354736000 |
| N | -10.423871000 | -29.627233000 | 26.647146000 |
| C | -10.534503000 | -29.232760000 | 25.389256000 |
| N | -10.806620000 | -30.278675000 | 24.572497000 |
| N | -10.628101000 | -34.886126000 | 25.994238000 |
| C | -11.436137000 | -35.905980000 | 25.347582000 |
| C | -11.130565000 | -36.030052000 | 23.855724000 |
| C | -11.656649000 | -34.875245000 | 23.004841000 |
| N | -11.361516000 | -34.973978000 | 21.680386000 |
| O | -12.311900000 | -33.944560000 | 23.465208000 |
| C | -9.922167000  | -28.994897000 | 15.654349000 |
| C | -9.572448000  | -28.138628000 | 16.867980000 |
| O | -8.353152000  | -27.904191000 | 17.094284000 |
| O | -10.540093000 | -27.664834000 | 17.523158000 |

|    |               |               |              |
|----|---------------|---------------|--------------|
| C  | -6.675481000  | -30.612418000 | 14.236826000 |
| C  | -5.378753000  | -30.471197000 | 15.025054000 |
| O  | -5.081506000  | -29.416818000 | 15.595114000 |
| N  | -4.606855000  | -31.584424000 | 15.078254000 |
| C  | -3.303427000  | -31.664310000 | 15.718164000 |
| C  | -2.707773000  | -28.091628000 | 18.384430000 |
| C  | -3.775479000  | -27.822569000 | 19.441556000 |
| O  | -4.820584000  | -27.213461000 | 19.046016000 |
| O  | -3.577675000  | -28.242216000 | 20.605966000 |
| C  | -2.240755000  | -31.271926000 | 20.526023000 |
| N  | -3.392300000  | -31.186619000 | 21.452131000 |
| C  | -7.347228000  | -23.509216000 | 18.522426000 |
| N  | -8.629729000  | -23.447638000 | 19.206367000 |
| C  | -9.544945000  | -24.435935000 | 19.146760000 |
| N  | -10.747583000 | -24.279111000 | 19.721792000 |
| N  | -9.267136000  | -25.555666000 | 18.496222000 |
| C  | -9.425187000  | -26.728500000 | 32.294142000 |
| C  | -9.650937000  | -26.953450000 | 30.827603000 |
| C  | -9.906183000  | -28.144824000 | 30.172500000 |
| N  | -9.603732000  | -25.925978000 | 29.907654000 |
| C  | -9.816520000  | -26.496409000 | 28.733221000 |
| N  | -10.009529000 | -27.835779000 | 28.837498000 |
| S  | -7.680881000  | -35.688786000 | 21.026917000 |
| S  | -4.637115000  | -36.972599000 | 22.605963000 |
| S  | -4.078437000  | -34.551002000 | 19.993822000 |
| S  | -5.651056000  | -33.303005000 | 23.135330000 |
| Fe | -3.987445000  | -34.721606000 | 22.304874000 |
| Fe | -6.298471000  | -33.576483000 | 20.772873000 |
| Fe | -6.514929000  | -35.528486000 | 23.043317000 |
| Fe | -5.483036000  | -36.331169000 | 20.506585000 |
| N  | -7.017798000  | -33.498730000 | 18.636808000 |
| C  | -7.279526000  | -32.098841000 | 18.274851000 |
| C  | -6.211578000  | -31.205285000 | 18.954542000 |
| O  | -5.594503000  | -31.710133000 | 19.947437000 |
| C  | -8.724421000  | -31.676450000 | 18.645278000 |
| C  | -9.313326000  | -32.287900000 | 19.925273000 |
| S  | -8.261652000  | -31.958530000 | 21.383832000 |
| C  | -9.191042000  | -32.776154000 | 22.705952000 |
| C  | -9.227926000  | -27.027825000 | 21.212590000 |
| C  | -8.531051000  | -28.188296000 | 21.269712000 |
| O  | -8.448436000  | -27.831707000 | 23.576070000 |
| C  | -7.031401000  | -28.230837000 | 21.222169000 |
| O  | -6.466495000  | -26.956792000 | 21.048328000 |
| C  | -6.530671000  | -28.890597000 | 22.521972000 |
| O  | -5.138831000  | -28.992917000 | 22.607767000 |
| C  | -7.115237000  | -28.100518000 | 23.734246000 |

|    |               |               |              |
|----|---------------|---------------|--------------|
| O  | -6.033603000  | -30.069534000 | 18.503318000 |
| N  | -6.736642000  | -27.759690000 | 28.837341000 |
| C  | -6.600617000  | -26.853465000 | 27.866932000 |
| N  | -6.655847000  | -27.044757000 | 26.547614000 |
| C  | -6.885657000  | -28.325099000 | 26.234320000 |
| C  | -7.090623000  | -29.379787000 | 27.138229000 |
| C  | -7.000131000  | -29.043200000 | 28.515050000 |
| N  | -7.182372000  | -29.933839000 | 29.511513000 |
| N  | -7.336752000  | -30.556162000 | 26.444722000 |
| C  | -7.271772000  | -30.218894000 | 25.177244000 |
| N  | -6.979584000  | -28.887674000 | 24.974959000 |
| C  | -13.616392000 | -26.497391000 | 18.053016000 |
| C  | -12.883000000 | -27.255998000 | 19.132762000 |
| O  | -12.257751000 | -26.686802000 | 20.029677000 |
| N  | -12.902893000 | -28.614181000 | 19.034595000 |
| C  | -11.863130000 | -29.402726000 | 19.668218000 |
| C  | -12.140116000 | -29.872145000 | 21.091614000 |
| O  | -11.196522000 | -30.290459000 | 21.777820000 |
| N  | -13.411891000 | -29.875152000 | 21.507675000 |
| C  | -13.808226000 | -30.421022000 | 22.797378000 |
| C  | -2.208158000  | -26.120423000 | 25.171473000 |
| C  | -3.031885000  | -26.916480000 | 26.189506000 |
| C  | -2.220074000  | -26.758160000 | 23.777609000 |
| C  | -5.206590000  | -22.857117000 | 25.015789000 |
| C  | -5.923112000  | -23.559593000 | 23.851777000 |
| C  | -5.068327000  | -24.713402000 | 23.313853000 |
| C  | -7.313744000  | -24.063365000 | 24.266796000 |
| Na | -6.154798000  | -28.181841000 | 17.348497000 |
| H  | -2.920452000  | -30.928522000 | 29.726006000 |
| H  | -4.561340000  | -30.532144000 | 29.198000000 |
| H  | -5.132382000  | -31.195657000 | 26.650785000 |
| H  | -1.120712000  | -30.770543000 | 28.174692000 |
| H  | -4.319305000  | -30.737540000 | 24.360393000 |
| H  | -0.300035000  | -30.346925000 | 25.872594000 |
| H  | -0.904206000  | -30.121921000 | 23.646164000 |
| H  | -4.347423000  | -32.699243000 | 30.452763000 |
| H  | -9.850126000  | -31.278087000 | 28.606243000 |
| H  | -11.517822000 | -31.860643000 | 28.410008000 |
| H  | -11.105685000 | -32.387091000 | 24.933891000 |
| H  | -10.937756000 | -30.244566000 | 23.549353000 |
| H  | -10.382621000 | -28.221047000 | 25.018292000 |
| H  | -9.965124000  | -33.689499000 | 28.742347000 |
| H  | -11.577796000 | -36.964458000 | 23.470481000 |
| H  | -10.041633000 | -36.127057000 | 23.688899000 |
| H  | -11.589496000 | -34.184135000 | 21.082572000 |
| H  | -10.645045000 | -35.616244000 | 21.348197000 |

|   |               |               |              |
|---|---------------|---------------|--------------|
| H | -12.491305000 | -35.638584000 | 25.501662000 |
| H | -9.165345000  | -29.773618000 | 15.474441000 |
| H | -10.922563000 | -29.445587000 | 15.757321000 |
| H | -7.372468000  | -31.279776000 | 14.775343000 |
| H | -3.136718000  | -30.737531000 | 16.285765000 |
| H | -1.712585000  | -28.212822000 | 18.841126000 |
| H | -2.970927000  | -29.028897000 | 17.860345000 |
| H | -2.328307000  | -32.208836000 | 19.956797000 |
| H | -2.276016000  | -30.402830000 | 19.856938000 |
| H | -3.339198000  | -31.947255000 | 22.156085000 |
| H | -4.297645000  | -31.273325000 | 20.915360000 |
| H | -3.411720000  | -30.291288000 | 21.959298000 |
| H | -6.614224000  | -24.140768000 | 19.060229000 |
| H | -7.481277000  | -23.907362000 | 17.502603000 |
| H | -8.783811000  | -22.693922000 | 19.867165000 |
| H | -11.378711000 | -25.088788000 | 19.830466000 |
| H | -11.012528000 | -23.390200000 | 20.129759000 |
| H | -9.947787000  | -26.335251000 | 18.302048000 |
| H | -8.316223000  | -25.803761000 | 18.244904000 |
| H | -9.620007000  | -27.650392000 | 32.868984000 |
| H | -10.087659000 | -25.933953000 | 32.686002000 |
| H | -9.998854000  | -29.166062000 | 30.536396000 |
| H | -10.156350000 | -28.510250000 | 28.048435000 |
| H | -9.833230000  | -25.983815000 | 27.769317000 |
| H | -14.515511000 | -27.026466000 | 17.695112000 |
| H | -10.918248000 | -28.840743000 | 19.670961000 |
| H | -11.696870000 | -30.306532000 | 19.059199000 |
| H | -13.331766000 | -29.007115000 | 18.203446000 |
| H | -13.374486000 | -31.427548000 | 22.934991000 |
| H | -14.112370000 | -29.485303000 | 20.883692000 |
| H | -1.161445000  | -26.040337000 | 25.525219000 |
| H | -2.987612000  | -26.459831000 | 27.195815000 |
| H | -2.665977000  | -27.956921000 | 26.271798000 |
| H | -4.096035000  | -26.960698000 | 25.895362000 |
| H | -1.746659000  | -27.755454000 | 23.794098000 |
| H | -3.248688000  | -26.909118000 | 23.405874000 |
| H | -1.683436000  | -26.136379000 | 23.037397000 |
| H | -5.095360000  | -23.548361000 | 25.873734000 |
| H | -4.192242000  | -22.530785000 | 24.718823000 |
| H | -6.055458000  | -22.819017000 | 23.037046000 |
| H | -4.880429000  | -25.448350000 | 24.115884000 |
| H | -5.564385000  | -25.252928000 | 22.488634000 |
| H | -4.083718000  | -24.357233000 | 22.958132000 |
| H | -7.946412000  | -23.239731000 | 24.648415000 |
| H | -7.228142000  | -24.832420000 | 25.057497000 |
| H | -7.838722000  | -24.531983000 | 23.413252000 |



|   |               |               |              |
|---|---------------|---------------|--------------|
| H | -6.400109000  | -39.557610000 | 20.261540000 |
| H | -7.660298000  | -38.484189000 | 19.574186000 |
| H | -1.468013000  | -33.333737000 | 25.346762000 |
| H | -3.182437000  | -33.791526000 | 25.134773000 |
| H | -4.450689000  | -34.168298000 | 27.334926000 |
| H | -6.537101000  | -33.534422000 | 25.931404000 |
| H | -6.240347000  | -36.364778000 | 27.056075000 |
| H | -5.255501000  | -35.697149000 | 25.719575000 |
| H | -7.158105000  | -31.928177000 | 17.191118000 |
| H | -8.757445000  | -30.574095000 | 18.691365000 |
| H | -9.395735000  | -31.970782000 | 17.818536000 |
| H | -9.418533000  | -33.381666000 | 19.837752000 |
| H | -10.302685000 | -31.852434000 | 20.128400000 |
| H | -8.729190000  | -32.483815000 | 23.659408000 |
| H | -9.114884000  | -33.865677000 | 22.600516000 |
| H | -10.235960000 | -32.440662000 | 22.680657000 |
| H | -8.686648000  | -26.079927000 | 21.166528000 |
| H | -10.320499000 | -27.012824000 | 21.228227000 |
| H | -9.055803000  | -29.147849000 | 21.323404000 |
| H | -6.722498000  | -28.902896000 | 20.397494000 |
| H | -5.812134000  | -27.002822000 | 20.282246000 |
| H | -6.962527000  | -29.903988000 | 22.551362000 |
| H | -4.690508000  | -28.458727000 | 21.891703000 |
| H | -6.497564000  | -27.196518000 | 23.883963000 |
| H | -6.416222000  | -25.823218000 | 28.197561000 |
| H | -7.039519000  | -29.588410000 | 30.455345000 |
| H | -7.082099000  | -30.941576000 | 29.343267000 |
| H | -7.401395000  | -30.911235000 | 24.348032000 |
| H | -9.632308000  | -34.870883000 | 25.767024000 |
| H | -3.379179000  | -33.373588000 | 29.119325000 |
| H | -14.905612000 | -30.491950000 | 22.830017000 |
| H | -13.466252000 | -29.779337000 | 23.628377000 |
| H | -11.265120000 | -36.892503000 | 25.830968000 |
| H | -1.913796000  | -35.072741000 | 25.208309000 |
| H | -6.898253000  | -39.750051000 | 18.546876000 |
| H | -1.304796000  | -31.275169000 | 21.103886000 |
| H | -12.910665000 | -26.395880000 | 17.208250000 |
| H | -13.890923000 | -25.496519000 | 18.418441000 |
| H | -6.945682000  | -22.491017000 | 18.425041000 |
| H | -5.754197000  | -21.962763000 | 25.369768000 |
| H | -2.588141000  | -25.079356000 | 25.119174000 |
| H | -2.689185000  | -27.283473000 | 17.635492000 |
| H | -6.522930000  | -31.032526000 | 13.223439000 |
| H | -3.241123000  | -32.525949000 | 16.408903000 |
| H | -2.501265000  | -31.776677000 | 14.964118000 |
| H | -9.936391000  | -28.312970000 | 14.783449000 |

|   |              |               |              |
|---|--------------|---------------|--------------|
| H | -8.384136000 | -26.413508000 | 32.509422000 |
| H | -6.207829000 | -33.864429000 | 18.128582000 |
| H | -8.324738000 | -32.431101000 | 26.742155000 |
| H | -4.915304000 | -32.395612000 | 14.551668000 |
| H | -7.141439000 | -29.620956000 | 14.146384000 |
| H | -7.802907000 | -34.119673000 | 18.430282000 |

**PFL-AE-decay-PC**

|   |               |               |              |
|---|---------------|---------------|--------------|
| C | -6.651188000  | -39.065577000 | 19.375686000 |
| S | -5.342701000  | -37.901506000 | 18.803955000 |
| C | -2.108729000  | -34.044409000 | 24.859936000 |
| S | -1.872040000  | -33.945362000 | 23.035588000 |
| C | -4.149229000  | -32.623902000 | 29.339049000 |
| C | -5.439530000  | -32.980130000 | 28.626833000 |
| O | -6.517464000  | -32.481385000 | 28.961001000 |
| C | -3.634722000  | -31.203281000 | 29.002154000 |
| C | -3.113672000  | -31.004181000 | 27.591861000 |
| C | -3.990299000  | -30.977235000 | 26.492336000 |
| C | -1.750469000  | -30.792160000 | 27.337696000 |
| C | -3.541830000  | -30.718771000 | 25.197786000 |
| C | -1.279872000  | -30.539383000 | 26.043346000 |
| C | -2.178459000  | -30.491633000 | 24.971578000 |
| O | -1.783235000  | -30.211017000 | 23.692571000 |
| N | -5.346363000  | -33.858599000 | 27.606237000 |
| C | -6.447002000  | -34.205441000 | 26.710334000 |
| C | -7.806445000  | -34.171870000 | 27.438210000 |
| O | -8.108504000  | -35.034841000 | 28.251589000 |
| C | -6.221183000  | -35.628601000 | 26.184616000 |
| S | -7.508639000  | -36.149623000 | 24.974479000 |
| N | -8.672323000  | -33.219899000 | 26.992654000 |
| C | -10.002062000 | -33.125491000 | 27.569818000 |
| C | -11.053474000 | -34.030853000 | 26.879139000 |
| O | -12.226848000 | -33.974145000 | 27.241784000 |
| C | -10.480564000 | -31.670009000 | 27.706949000 |
| C | -10.544450000 | -30.883854000 | 26.426814000 |
| C | -10.859902000 | -31.309194000 | 25.150740000 |
| N | -10.252165000 | -29.533529000 | 26.393635000 |
| C | -10.369367000 | -29.157748000 | 25.129881000 |
| N | -10.736212000 | -30.200154000 | 24.341812000 |
| N | -10.591667000 | -34.884131000 | 25.937890000 |
| C | -11.412946000 | -35.912794000 | 25.320048000 |
| C | -11.099653000 | -36.084182000 | 23.833831000 |
| C | -11.554351000 | -34.919908000 | 22.953902000 |
| N | -11.189747000 | -35.027197000 | 21.647383000 |
| O | -12.221894000 | -33.978997000 | 23.374679000 |

|    |               |               |              |
|----|---------------|---------------|--------------|
| C  | -10.061842000 | -28.913951000 | 15.703501000 |
| C  | -9.428060000  | -28.118186000 | 16.844270000 |
| O  | -8.197957000  | -28.280152000 | 17.057822000 |
| O  | -10.168880000 | -27.311151000 | 17.464990000 |
| C  | -6.677971000  | -30.619884000 | 14.240149000 |
| C  | -5.370703000  | -30.468029000 | 15.009178000 |
| O  | -5.050381000  | -29.400778000 | 15.541081000 |
| N  | -4.610768000  | -31.588509000 | 15.087112000 |
| C  | -3.303352000  | -31.664195000 | 15.719309000 |
| C  | -2.676453000  | -28.031509000 | 18.446805000 |
| C  | -3.759105000  | -27.753687000 | 19.486852000 |
| O  | -4.798896000  | -27.143728000 | 19.083948000 |
| O  | -3.580597000  | -28.176077000 | 20.655547000 |
| C  | -2.254754000  | -31.256129000 | 20.555777000 |
| N  | -3.360615000  | -31.143343000 | 21.529486000 |
| C  | -7.032823000  | -23.146254000 | 19.317893000 |
| N  | -8.429481000  | -23.425039000 | 19.633385000 |
| C  | -9.130220000  | -24.490956000 | 19.191916000 |
| N  | -10.469503000 | -24.418045000 | 19.122941000 |
| N  | -8.513844000  | -25.609028000 | 18.809944000 |
| C  | -9.372979000  | -26.840455000 | 32.238070000 |
| C  | -9.553385000  | -27.003717000 | 30.754638000 |
| C  | -9.766700000  | -28.170177000 | 30.040891000 |
| N  | -9.534793000  | -25.932915000 | 29.883636000 |
| C  | -9.720375000  | -26.451928000 | 28.681851000 |
| N  | -9.871742000  | -27.801291000 | 28.719915000 |
| S  | -7.593047000  | -35.675048000 | 20.970949000 |
| S  | -4.573158000  | -36.990471000 | 22.587108000 |
| S  | -3.980999000  | -34.596259000 | 19.970841000 |
| S  | -5.571161000  | -33.316320000 | 23.104296000 |
| Fe | -3.909763000  | -34.741566000 | 22.285358000 |
| Fe | -6.190519000  | -33.583422000 | 20.728573000 |
| Fe | -6.449636000  | -35.533240000 | 23.005637000 |
| Fe | -5.401918000  | -36.358295000 | 20.479078000 |
| N  | -6.851323000  | -33.461465000 | 18.573273000 |
| C  | -7.083009000  | -32.050355000 | 18.229139000 |
| C  | -6.021766000  | -31.186664000 | 18.956841000 |
| O  | -5.444752000  | -31.727153000 | 19.954926000 |
| C  | -8.532337000  | -31.620440000 | 18.567593000 |
| C  | -9.153910000  | -32.237904000 | 19.829707000 |
| S  | -8.136310000  | -31.926553000 | 21.318068000 |
| C  | -9.110898000  | -32.725083000 | 22.620608000 |
| C  | -9.516725000  | -27.101687000 | 21.346076000 |
| C  | -8.717495000  | -28.164127000 | 21.163610000 |
| O  | -8.131877000  | -27.191711000 | 23.618498000 |
| C  | -7.218871000  | -28.122262000 | 21.090508000 |

|    |               |               |              |
|----|---------------|---------------|--------------|
| O  | -6.700085000  | -26.836473000 | 20.825405000 |
| C  | -6.667934000  | -28.755459000 | 22.387013000 |
| O  | -5.325463000  | -29.093735000 | 22.362940000 |
| C  | -6.976790000  | -27.844850000 | 23.670200000 |
| O  | -5.802475000  | -30.045012000 | 18.541332000 |
| N  | -6.620469000  | -27.603019000 | 28.756282000 |
| C  | -6.527899000  | -26.683615000 | 27.793086000 |
| N  | -6.602872000  | -26.862582000 | 26.473284000 |
| C  | -6.800097000  | -28.148002000 | 26.152294000 |
| C  | -6.964739000  | -29.217040000 | 27.047152000 |
| C  | -6.857446000  | -28.890156000 | 28.426310000 |
| N  | -6.992834000  | -29.791989000 | 29.417517000 |
| N  | -7.177293000  | -30.392819000 | 26.344286000 |
| C  | -7.128255000  | -30.040885000 | 25.079066000 |
| N  | -6.890653000  | -28.695968000 | 24.888345000 |
| C  | -13.454584000 | -26.648171000 | 17.517891000 |
| C  | -12.761560000 | -27.331861000 | 18.672921000 |
| O  | -12.231076000 | -26.701251000 | 19.585709000 |
| N  | -12.715032000 | -28.695461000 | 18.625974000 |
| C  | -11.705334000 | -29.419316000 | 19.372278000 |
| C  | -12.077720000 | -29.868459000 | 20.782880000 |
| O  | -11.189480000 | -30.309729000 | 21.526849000 |
| N  | -13.366801000 | -29.818951000 | 21.137523000 |
| C  | -13.828682000 | -30.321754000 | 22.422488000 |
| C  | -2.213190000  | -26.122980000 | 25.140307000 |
| C  | -3.020128000  | -26.934758000 | 26.158729000 |
| C  | -2.257670000  | -26.730822000 | 23.734118000 |
| C  | -5.208225000  | -22.826349000 | 24.943442000 |
| C  | -5.921156000  | -23.413553000 | 23.715435000 |
| C  | -5.092276000  | -24.551482000 | 23.105181000 |
| C  | -7.335133000  | -23.896653000 | 24.068378000 |
| Na | -6.028406000  | -28.186592000 | 17.347340000 |
| H  | -2.833237000  | -30.964388000 | 29.721421000 |
| H  | -4.455784000  | -30.491374000 | 29.199068000 |
| H  | -5.058560000  | -31.135923000 | 26.646202000 |
| H  | -1.035132000  | -30.805882000 | 28.166894000 |
| H  | -4.246878000  | -30.669288000 | 24.364362000 |
| H  | -0.213137000  | -30.364373000 | 25.868164000 |
| H  | -0.820696000  | -30.078047000 | 23.648514000 |
| H  | -4.369384000  | -32.668916000 | 30.418907000 |
| H  | -9.795830000  | -31.148434000 | 28.397730000 |
| H  | -11.470662000 | -31.706863000 | 28.193941000 |
| H  | -11.162038000 | -32.277936000 | 24.756618000 |
| H  | -10.900898000 | -30.181700000 | 23.323812000 |
| H  | -10.140506000 | -28.169842000 | 24.730750000 |
| H  | -9.948227000  | -33.545461000 | 28.589275000 |

|   |               |               |              |
|---|---------------|---------------|--------------|
| H | -11.596170000 | -36.999352000 | 23.462130000 |
| H | -10.016549000 | -36.245612000 | 23.682593000 |
| H | -11.374727000 | -34.233492000 | 21.039793000 |
| H | -10.451306000 | -35.665605000 | 21.357186000 |
| H | -12.463850000 | -35.620617000 | 25.457382000 |
| H | -9.553051000  | -29.880594000 | 15.555472000 |
| H | -11.140809000 | -29.066703000 | 15.871327000 |
| H | -7.361544000  | -31.300236000 | 14.779910000 |
| H | -3.136121000  | -30.737012000 | 16.286570000 |
| H | -1.679729000  | -28.074345000 | 18.914636000 |
| H | -2.887741000  | -29.019449000 | 17.996761000 |
| H | -2.385089000  | -32.191787000 | 19.993131000 |
| H | -2.297589000  | -30.387017000 | 19.887024000 |
| H | -3.303397000  | -31.913512000 | 22.222567000 |
| H | -4.283688000  | -31.202670000 | 21.018684000 |
| H | -3.314081000  | -30.255354000 | 22.042414000 |
| H | -6.559980000  | -22.647930000 | 20.179589000 |
| H | -6.487834000  | -24.081030000 | 19.127884000 |
| H | -8.966857000  | -22.649753000 | 20.008517000 |
| H | -11.044260000 | -25.273600000 | 19.156437000 |
| H | -10.943772000 | -23.531087000 | 19.255581000 |
| H | -9.116107000  | -26.350585000 | 18.370824000 |
| H | -7.705230000  | -25.932211000 | 19.356381000 |
| H | -9.466929000  | -27.813139000 | 32.751419000 |
| H | -10.136560000 | -26.160080000 | 32.661127000 |
| H | -9.828933000  | -29.209896000 | 30.355037000 |
| H | -9.988887000  | -28.435073000 | 27.897653000 |
| H | -9.744806000  | -25.894999000 | 27.743215000 |
| H | -14.228857000 | -27.273041000 | 17.042246000 |
| H | -10.795809000 | -28.805143000 | 19.441746000 |
| H | -11.440237000 | -30.328648000 | 18.808304000 |
| H | -13.111705000 | -29.153372000 | 17.812378000 |
| H | -13.433874000 | -31.338365000 | 22.597322000 |
| H | -14.027690000 | -29.423676000 | 20.475102000 |
| H | -1.158683000  | -26.055523000 | 25.472854000 |
| H | -2.957367000  | -26.495929000 | 27.171851000 |
| H | -2.657512000  | -27.977658000 | 26.216446000 |
| H | -4.088749000  | -26.967536000 | 25.881356000 |
| H | -1.796678000  | -27.733867000 | 23.720873000 |
| H | -3.294367000  | -26.859591000 | 23.375139000 |
| H | -1.727798000  | -26.100147000 | 22.996661000 |
| H | -5.117722000  | -23.593002000 | 25.737367000 |
| H | -4.186281000  | -22.487564000 | 24.689598000 |
| H | -6.013107000  | -22.610389000 | 22.955761000 |
| H | -4.903706000  | -25.329697000 | 23.866156000 |
| H | -5.611462000  | -25.037356000 | 22.259666000 |

|   |               |               |              |
|---|---------------|---------------|--------------|
| H | -4.106375000  | -24.194261000 | 22.754363000 |
| H | -7.938409000  | -23.081909000 | 24.511955000 |
| H | -7.291399000  | -24.731875000 | 24.791768000 |
| H | -7.863235000  | -24.268292000 | 23.171394000 |
| H | -6.299756000  | -39.657304000 | 20.238414000 |
| H | -7.557394000  | -38.510960000 | 19.671931000 |
| H | -1.411032000  | -33.349935000 | 25.356256000 |
| H | -3.137618000  | -33.750413000 | 25.124888000 |
| H | -4.427452000  | -34.203157000 | 27.346322000 |
| H | -6.458983000  | -33.504582000 | 25.858167000 |
| H | -6.249784000  | -36.318944000 | 27.042871000 |
| H | -5.227046000  | -35.699708000 | 25.711722000 |
| H | -6.928586000  | -31.862746000 | 17.152865000 |
| H | -8.561504000  | -30.517901000 | 18.606460000 |
| H | -9.184116000  | -31.912352000 | 17.723939000 |
| H | -9.262112000  | -33.330715000 | 19.732458000 |
| H | -10.144334000 | -31.798885000 | 20.015764000 |
| H | -8.701663000  | -32.389804000 | 23.584488000 |
| H | -9.010478000  | -33.815959000 | 22.553962000 |
| H | -10.160661000 | -32.413360000 | 22.537951000 |
| H | -9.101042000  | -26.095990000 | 21.439013000 |
| H | -10.604300000 | -27.209748000 | 21.387923000 |
| H | -9.156399000  | -29.166895000 | 21.121026000 |
| H | -6.897337000  | -28.823744000 | 20.294834000 |
| H | -5.892809000  | -26.936588000 | 20.220202000 |
| H | -7.242805000  | -29.681300000 | 22.534818000 |
| H | -4.782064000  | -28.525291000 | 21.732488000 |
| H | -6.123703000  | -27.140780000 | 23.716197000 |
| H | -6.364246000  | -25.652281000 | 28.131489000 |
| H | -6.862443000  | -29.451070000 | 30.364320000 |
| H | -6.926611000  | -30.801515000 | 29.240595000 |
| H | -7.223808000  | -30.738426000 | 24.249050000 |
| H | -9.592626000  | -34.900035000 | 25.723681000 |
| H | -3.379179000  | -33.373588000 | 29.119325000 |
| H | -14.928248000 | -30.353813000 | 22.419173000 |
| H | -13.490347000 | -29.675123000 | 23.251657000 |
| H | -11.265120000 | -36.892503000 | 25.830968000 |
| H | -1.913796000  | -35.072741000 | 25.208309000 |
| H | -6.898253000  | -39.750051000 | 18.546876000 |
| H | -1.304796000  | -31.275169000 | 21.103886000 |
| H | -12.667142000 | -26.430248000 | 16.773768000 |
| H | -13.895642000 | -25.699088000 | 17.859118000 |
| H | -6.945682000  | -22.491017000 | 18.425041000 |
| H | -5.754197000  | -21.962763000 | 25.369768000 |
| H | -2.588141000  | -25.079356000 | 25.119174000 |
| H | -2.689185000  | -27.283473000 | 17.635492000 |

|   |              |               |              |
|---|--------------|---------------|--------------|
| H | -6.522930000 | -31.032526000 | 13.223439000 |
| H | -3.241123000 | -32.525949000 | 16.408903000 |
| H | -2.501265000 | -31.776677000 | 14.964118000 |
| H | -9.936391000 | -28.312970000 | 14.783449000 |
| H | -8.384136000 | -26.413508000 | 32.509422000 |
| H | -6.030264000 | -33.828245000 | 18.084023000 |
| H | -8.274431000 | -32.378620000 | 26.563442000 |
| H | -4.934733000 | -32.412377000 | 14.590315000 |
| H | -7.160452000 | -29.635028000 | 14.162076000 |
| H | -7.638326000 | -34.065603000 | 18.327366000 |

**LAM-decay-TS**

|   |               |              |               |
|---|---------------|--------------|---------------|
| C | -51.071301000 | 14.399939000 | -68.996365000 |
| S | -49.745503000 | 15.639487000 | -68.661765000 |
| C | -50.292631000 | 10.542286000 | -62.810244000 |
| S | -50.101367000 | 10.444482000 | -64.641986000 |
| C | -48.592902000 | 11.509239000 | -57.838383000 |
| C | -48.182372000 | 10.352707000 | -58.709214000 |
| C | -47.485859000 | 10.384737000 | -59.907708000 |
| N | -48.417686000 | 9.039394000  | -58.351282000 |
| C | -47.877276000 | 8.306966000  | -59.309914000 |
| N | -47.301486000 | 9.068593000  | -60.277026000 |
| C | -49.037545000 | 15.469426000 | -61.089156000 |
| S | -47.690681000 | 16.150033000 | -62.149171000 |
| C | -44.601953000 | 16.957836000 | -59.761295000 |
| C | -43.172695000 | 17.286917000 | -59.358523000 |
| O | -44.587693000 | 16.262488000 | -60.996986000 |
| C | -43.767260000 | 18.935076000 | -63.630675000 |
| N | -43.431803000 | 18.478978000 | -64.971052000 |
| C | -42.320062000 | 17.796944000 | -65.288134000 |
| N | -41.464392000 | 17.401639000 | -64.339461000 |
| N | -42.029959000 | 17.548239000 | -66.574605000 |
| C | -40.211674000 | 16.601530000 | -70.049582000 |
| O | -40.798500000 | 15.949181000 | -68.943969000 |
| C | -44.290050000 | 7.306835000  | -66.039591000 |
| C | -44.941027000 | 7.836179000  | -64.793770000 |
| C | -45.227218000 | 7.292421000  | -63.552272000 |
| N | -45.478534000 | 9.105946000  | -64.751148000 |
| C | -46.045437000 | 9.283739000  | -63.533026000 |
| N | -45.917148000 | 8.205729000  | -62.775333000 |
| C | -38.966579000 | 6.551527000  | -63.521033000 |
| C | -39.054127000 | 8.031404000  | -63.888177000 |
| C | -37.780230000 | 8.569170000  | -64.575202000 |
| C | -37.936794000 | 10.016095000 | -65.020948000 |
| N | -38.574301000 | 10.209136000 | -66.195000000 |

|   |               |              |               |
|---|---------------|--------------|---------------|
| O | -37.547831000 | 10.977185000 | -64.345039000 |
| C | -43.331813000 | 8.164571000  | -58.722564000 |
| C | -43.867514000 | 7.334413000  | -59.892665000 |
| C | -44.407404000 | 9.043480000  | -58.078900000 |
| C | -39.296559000 | 9.962374000  | -57.420901000 |
| C | -38.576281000 | 10.485762000 | -58.642034000 |
| C | -38.911486000 | 10.041823000 | -59.930547000 |
| C | -37.512660000 | 11.401341000 | -58.533122000 |
| C | -38.205937000 | 10.476085000 | -61.053984000 |
| C | -36.798481000 | 11.845058000 | -59.647795000 |
| C | -37.138765000 | 11.377039000 | -60.926792000 |
| O | -36.446769000 | 11.829033000 | -62.002546000 |
| C | -42.444252000 | 15.385043000 | -55.391371000 |
| C | -41.344458000 | 14.673441000 | -56.211182000 |
| O | -40.594076000 | 13.851792000 | -55.649811000 |
| O | -41.340761000 | 14.968194000 | -57.452087000 |
| C | -36.817153000 | 15.279397000 | -56.393269000 |
| C | -36.477235000 | 14.774702000 | -57.814447000 |
| O | -35.363681000 | 14.246043000 | -58.000108000 |
| O | -37.388720000 | 14.936729000 | -58.686166000 |
| N | -45.152181000 | 13.342525000 | -68.061596000 |
| C | -43.871993000 | 12.615397000 | -67.998610000 |
| C | -44.043947000 | 11.352857000 | -67.116078000 |
| O | -43.078484000 | 10.565833000 | -67.063110000 |
| C | -42.730412000 | 13.512893000 | -67.478315000 |
| C | -43.087997000 | 14.475168000 | -66.342553000 |
| S | -43.952691000 | 13.652927000 | -64.956305000 |
| C | -44.150575000 | 15.027868000 | -63.795883000 |
| C | -40.663478000 | 12.319759000 | -64.389416000 |
| C | -40.887226000 | 11.095358000 | -63.841106000 |
| O | -41.095382000 | 11.650995000 | -61.732194000 |
| C | -42.223827000 | 10.393522000 | -63.823011000 |
| O | -42.256869000 | 9.376661000  | -64.797078000 |
| C | -42.480319000 | 9.793111000  | -62.429555000 |
| O | -41.620363000 | 8.692102000  | -62.235719000 |
| C | -42.160785000 | 10.895581000 | -61.368198000 |
| O | -45.151892000 | 11.225949000 | -66.507839000 |
| N | -44.455887000 | 13.299192000 | -57.468131000 |
| C | -43.309538000 | 12.603252000 | -57.552934000 |
| N | -42.774338000 | 12.024457000 | -58.629207000 |
| C | -43.533086000 | 12.193805000 | -59.718572000 |
| C | -44.735185000 | 12.909869000 | -59.784237000 |
| C | -45.188767000 | 13.487151000 | -58.578182000 |
| N | -46.349687000 | 14.188741000 | -58.521624000 |
| N | -45.271197000 | 12.849958000 | -61.050551000 |
| C | -44.424066000 | 12.118234000 | -61.736109000 |



|    |               |              |               |
|----|---------------|--------------|---------------|
| N  | -43.344098000 | 11.687258000 | -60.990477000 |
| S  | -50.107016000 | 14.468704000 | -64.942745000 |
| S  | -48.326240000 | 12.381180000 | -67.345913000 |
| S  | -47.059069000 | 12.603042000 | -63.889950000 |
| S  | -46.822103000 | 15.652407000 | -66.122611000 |
| Fe | -46.243864000 | 13.148301000 | -66.113706000 |
| Fe | -47.828276000 | 14.866613000 | -64.120226000 |
| Fe | -48.756576000 | 14.624920000 | -66.864949000 |
| Fe | -48.989423000 | 12.396003000 | -65.118223000 |
| C  | -36.775693000 | 17.683857000 | -65.078487000 |
| N  | -37.810762000 | 16.999600000 | -64.825261000 |
| C  | -37.819279000 | 15.585316000 | -65.179041000 |
| C  | -38.973443000 | 15.379809000 | -66.200579000 |
| O  | -40.142174000 | 15.640319000 | -65.794379000 |
| C  | -37.917944000 | 14.728597000 | -63.893231000 |
| C  | -39.073972000 | 15.028169000 | -62.924118000 |
| C  | -38.960443000 | 14.203700000 | -61.635585000 |
| C  | -40.040608000 | 14.526372000 | -60.602884000 |
| N  | -39.768960000 | 13.850096000 | -59.302347000 |
| O  | -38.682042000 | 15.018809000 | -67.360859000 |
| H  | -48.403322000 | 12.467235000 | -58.349727000 |
| H  | -48.001455000 | 11.522157000 | -56.902149000 |
| H  | -47.099559000 | 11.213448000 | -60.499138000 |
| H  | -46.795081000 | 8.706890000  | -61.109567000 |
| H  | -47.872329000 | 7.216072000  | -59.354814000 |
| H  | -45.196915000 | 17.893122000 | -59.845977000 |
| H  | -43.165830000 | 17.928659000 | -58.458425000 |
| H  | -42.599379000 | 16.375932000 | -59.113111000 |
| H  | -42.659468000 | 17.828747000 | -60.175126000 |
| H  | -45.516693000 | 16.098602000 | -61.282708000 |
| H  | -44.214360000 | 18.137442000 | -63.006078000 |
| H  | -42.869341000 | 19.328021000 | -63.124000000 |
| H  | -44.104917000 | 18.650793000 | -65.710016000 |
| H  | -41.739707000 | 17.412375000 | -63.364193000 |
| H  | -40.700701000 | 16.759270000 | -64.647903000 |
| H  | -41.320069000 | 16.836061000 | -66.793323000 |
| H  | -42.679798000 | 17.807468000 | -67.307700000 |
| H  | -39.634437000 | 17.504643000 | -69.753625000 |
| H  | -39.524205000 | 15.937191000 | -70.615888000 |
| H  | -40.079226000 | 15.538210000 | -68.389284000 |
| H  | -43.848850000 | 8.138498000  | -66.613121000 |
| H  | -45.030952000 | 6.807987000  | -66.694204000 |
| H  | -44.970561000 | 6.300267000  | -63.178744000 |
| H  | -46.542734000 | 10.214906000 | -63.259522000 |
| H  | -39.245929000 | 8.605218000  | -62.971106000 |
| H  | -39.936756000 | 8.207891000  | -64.525112000 |

|   |               |              |               |
|---|---------------|--------------|---------------|
| H | -36.928502000 | 8.530235000  | -63.876537000 |
| H | -37.533083000 | 7.938357000  | -65.448899000 |
| H | -38.819656000 | 11.157060000 | -66.470196000 |
| H | -38.987142000 | 9.440665000  | -66.713211000 |
| H | -38.068905000 | 6.329663000  | -62.914889000 |
| H | -42.499248000 | 8.806529000  | -59.069937000 |
| H | -44.294225000 | 7.973124000  | -60.686671000 |
| H | -44.681635000 | 6.663046000  | -59.561022000 |
| H | -43.083223000 | 6.692158000  | -60.338345000 |
| H | -43.996641000 | 9.638614000  | -57.244847000 |
| H | -45.243866000 | 8.432175000  | -57.692348000 |
| H | -44.834394000 | 9.749437000  | -58.813563000 |
| H | -39.358279000 | 10.730431000 | -56.628820000 |
| H | -40.326839000 | 9.647259000  | -57.666105000 |
| H | -39.746233000 | 9.348054000  | -60.074574000 |
| H | -37.234864000 | 11.798137000 | -57.550317000 |
| H | -38.498432000 | 10.144750000 | -62.048337000 |
| H | -36.013281000 | 12.593518000 | -59.517202000 |
| H | -36.821341000 | 11.450257000 | -62.837008000 |
| H | -42.436716000 | 16.469101000 | -55.606253000 |
| H | -43.420708000 | 14.996108000 | -55.734621000 |
| H | -37.235920000 | 16.300974000 | -56.445313000 |
| H | -37.609712000 | 14.638526000 | -55.960450000 |
| H | -52.003902000 | 14.678370000 | -68.476150000 |
| H | -50.758217000 | 13.399419000 | -68.655520000 |
| H | -50.087777000 | 9.553199000  | -62.365064000 |
| H | -49.582448000 | 11.267692000 | -62.379488000 |
| H | -49.282324000 | 16.196516000 | -60.295603000 |
| H | -49.939534000 | 15.286423000 | -61.696494000 |
| H | -45.036690000 | 14.303531000 | -68.391344000 |
| H | -43.568420000 | 12.242456000 | -68.993219000 |
| H | -41.908038000 | 12.847101000 | -67.168159000 |
| H | -42.333635000 | 14.138901000 | -68.297272000 |
| H | -42.157809000 | 14.919331000 | -65.964026000 |
| H | -43.752951000 | 15.283322000 | -66.688575000 |
| H | -44.817865000 | 14.669093000 | -63.000170000 |
| H | -43.178262000 | 15.303141000 | -63.361021000 |
| H | -44.618049000 | 15.886002000 | -64.302908000 |
| H | -39.644225000 | 12.695448000 | -64.495876000 |
| H | -41.489660000 | 12.967835000 | -64.687943000 |
| H | -40.035946000 | 10.466393000 | -63.594891000 |
| H | -43.014330000 | 11.139047000 | -64.016241000 |
| H | -42.557447000 | 9.782429000  | -65.653761000 |
| H | -43.535457000 | 9.478520000  | -62.347234000 |
| H | -41.994387000 | 8.121080000  | -61.545076000 |
| H | -41.889510000 | 10.363024000 | -60.434879000 |

|   |               |              |               |
|---|---------------|--------------|---------------|
| H | -42.741526000 | 12.505619000 | -56.621981000 |
| H | -46.568848000 | 14.699986000 | -57.673274000 |
| H | -46.761454000 | 14.508058000 | -59.393114000 |
| H | -44.556327000 | 11.850725000 | -62.782816000 |
| H | -35.864465000 | 17.265335000 | -65.557809000 |
| H | -36.885297000 | 15.297479000 | -65.702123000 |
| H | -36.966062000 | 14.876716000 | -63.348337000 |
| H | -39.062475000 | 16.106253000 | -62.680009000 |
| H | -40.040221000 | 14.830979000 | -63.417674000 |
| H | -37.979535000 | 14.380198000 | -61.161302000 |
| H | -39.013445000 | 13.128382000 | -61.874014000 |
| H | -40.070629000 | 15.607556000 | -60.386498000 |
| H | -41.038168000 | 14.213819000 | -60.951292000 |
| H | -40.441687000 | 14.193679000 | -58.519642000 |
| H | -45.801932000 | 12.883854000 | -68.705689000 |
| H | -39.824258000 | 12.826430000 | -59.392466000 |
| H | -38.790980000 | 14.123396000 | -58.979029000 |
| H | -37.922128000 | 13.661446000 | -64.181159000 |
| H | -45.371797000 | 9.851092000  | -65.471191000 |
| H | -41.004588000 | 16.930437000 | -70.758120000 |
| H | -51.261512000 | 14.357696000 | -70.081905000 |
| H | -51.322622000 | 10.844298000 | -62.551716000 |
| H | -49.661421000 | 11.476915000 | -57.534186000 |
| H | -39.853004000 | 6.232533000  | -62.953150000 |
| H | -38.768273000 | 9.078868000  | -57.002288000 |
| H | -35.930670000 | 15.274702000 | -55.730165000 |
| H | -42.887764000 | 7.489049000  | -57.966162000 |
| H | -42.364047000 | 15.224418000 | -54.297092000 |
| H | -45.073781000 | 16.339107000 | -58.968277000 |
| H | -43.482213000 | 6.576202000  | -65.842469000 |
| H | -44.475205000 | 19.767615000 | -63.736529000 |
| H | -38.951031000 | 5.911374000  | -64.412710000 |
| H | -48.749492000 | 14.517893000 | -60.609665000 |
| H | -36.752189000 | 18.755067000 | -64.816816000 |

### LAM-decay-PC

|   |               |              |               |
|---|---------------|--------------|---------------|
| C | -51.092150000 | 14.419888000 | -68.994014000 |
| S | -49.764201000 | 15.656776000 | -68.657903000 |
| C | -50.293215000 | 10.547347000 | -62.817657000 |
| S | -50.117037000 | 10.450687000 | -64.650962000 |
| C | -48.592579000 | 11.504371000 | -57.837054000 |
| C | -48.189294000 | 10.350198000 | -58.714261000 |
| C | -47.486029000 | 10.383816000 | -59.908775000 |
| N | -48.439707000 | 9.036846000  | -58.366916000 |
| C | -47.901557000 | 8.305875000  | -59.327987000 |
| N | -47.312659000 | 9.068580000  | -60.286403000 |

|   |               |              |               |
|---|---------------|--------------|---------------|
| C | -49.036860000 | 15.471548000 | -61.085046000 |
| S | -47.692849000 | 16.150884000 | -62.149443000 |
| C | -44.602105000 | 16.956844000 | -59.762160000 |
| C | -43.173095000 | 17.286686000 | -59.359210000 |
| O | -44.587839000 | 16.259489000 | -60.996875000 |
| C | -43.766612000 | 18.935438000 | -63.631820000 |
| N | -43.429493000 | 18.482383000 | -64.972592000 |
| C | -42.319862000 | 17.796128000 | -65.288716000 |
| N | -41.467315000 | 17.396628000 | -64.339268000 |
| N | -42.028989000 | 17.547034000 | -66.574956000 |
| C | -40.212059000 | 16.600889000 | -70.049506000 |
| O | -40.799206000 | 15.947244000 | -68.944899000 |
| C | -44.320802000 | 7.270553000  | -66.044472000 |
| C | -44.965419000 | 7.815214000  | -64.801679000 |
| C | -45.246649000 | 7.282852000  | -63.554166000 |
| N | -45.498841000 | 9.086977000  | -64.766834000 |
| C | -46.057273000 | 9.277389000  | -63.546570000 |
| N | -45.928462000 | 8.205159000  | -62.780758000 |
| C | -38.966709000 | 6.552010000  | -63.522388000 |
| C | -39.049887000 | 8.028078000  | -63.904424000 |
| C | -37.773022000 | 8.549482000  | -64.599057000 |
| C | -37.915026000 | 9.996181000  | -65.050449000 |
| N | -38.513793000 | 10.188947000 | -66.244983000 |
| O | -37.549463000 | 10.956263000 | -64.360441000 |
| C | -43.330696000 | 8.165239000  | -58.723092000 |
| C | -43.865213000 | 7.336714000  | -59.894962000 |
| C | -44.406345000 | 9.044731000  | -58.080098000 |
| C | -39.292769000 | 9.964381000  | -57.421787000 |
| C | -38.572478000 | 10.485787000 | -58.644030000 |
| C | -38.909062000 | 10.040369000 | -59.931818000 |
| C | -37.510312000 | 11.403398000 | -58.538010000 |
| C | -38.206633000 | 10.474797000 | -61.057331000 |
| C | -36.798475000 | 11.846986000 | -59.654552000 |
| C | -37.140426000 | 11.377165000 | -60.932519000 |
| O | -36.452127000 | 11.829148000 | -62.011057000 |
| C | -42.446250000 | 15.381065000 | -55.391763000 |
| C | -41.342999000 | 14.674112000 | -56.210494000 |
| O | -40.597687000 | 13.846470000 | -55.651076000 |
| O | -41.332856000 | 14.976875000 | -57.449444000 |
| C | -36.817072000 | 15.278584000 | -56.393452000 |
| C | -36.476415000 | 14.774433000 | -57.814685000 |
| O | -35.364279000 | 14.242511000 | -57.999131000 |
| O | -37.386207000 | 14.939691000 | -58.687616000 |
| N | -45.180961000 | 13.352045000 | -68.070730000 |
| C | -43.905398000 | 12.616431000 | -68.018001000 |
| C | -44.081833000 | 11.346962000 | -67.146363000 |

|    |               |              |               |
|----|---------------|--------------|---------------|
| O  | -43.127981000 | 10.544220000 | -67.122268000 |
| C  | -42.755247000 | 13.502518000 | -67.494779000 |
| C  | -43.103095000 | 14.469536000 | -66.359747000 |
| S  | -43.970345000 | 13.655116000 | -64.970625000 |
| C  | -44.161698000 | 15.032469000 | -63.811644000 |
| C  | -40.672158000 | 12.314190000 | -64.447168000 |
| C  | -40.893368000 | 11.067738000 | -63.978713000 |
| O  | -41.071703000 | 11.617878000 | -61.707524000 |
| C  | -42.237193000 | 10.391117000 | -63.898701000 |
| O  | -42.321171000 | 9.357355000  | -64.854658000 |
| C  | -42.473034000 | 9.795597000  | -62.496896000 |
| O  | -41.617052000 | 8.693012000  | -62.309982000 |
| C  | -42.158485000 | 10.879930000 | -61.406259000 |
| O  | -45.179223000 | 11.228423000 | -66.517998000 |
| N  | -44.420347000 | 13.285188000 | -57.499045000 |
| C  | -43.273113000 | 12.592244000 | -57.593700000 |
| N  | -42.745376000 | 12.016411000 | -58.675637000 |
| C  | -43.514109000 | 12.186444000 | -59.757825000 |
| C  | -44.717356000 | 12.900402000 | -59.813658000 |
| C  | -45.162576000 | 13.474047000 | -58.602715000 |
| N  | -46.324913000 | 14.171837000 | -58.535362000 |
| N  | -45.263697000 | 12.839565000 | -61.075537000 |
| C  | -44.421812000 | 12.109337000 | -61.768807000 |
| N  | -43.334933000 | 11.680432000 | -61.031333000 |
| S  | -50.122584000 | 14.477278000 | -64.941551000 |
| S  | -48.348280000 | 12.392982000 | -67.352221000 |
| S  | -47.077606000 | 12.603383000 | -63.896812000 |
| S  | -46.838471000 | 15.660627000 | -66.124284000 |
| Fe | -46.263695000 | 13.153347000 | -66.119511000 |
| Fe | -47.840817000 | 14.870370000 | -64.122180000 |
| Fe | -48.774544000 | 14.636607000 | -66.864939000 |
| Fe | -49.008228000 | 12.403830000 | -65.125287000 |
| C  | -36.776395000 | 17.682881000 | -65.074468000 |
| N  | -37.811329000 | 16.998008000 | -64.821887000 |
| C  | -37.820259000 | 15.584458000 | -65.178836000 |
| C  | -38.973225000 | 15.381697000 | -66.202329000 |
| O  | -40.142928000 | 15.638690000 | -65.796746000 |
| C  | -37.920818000 | 14.724629000 | -63.895197000 |
| C  | -39.078810000 | 15.021661000 | -62.927627000 |
| C  | -38.962647000 | 14.200914000 | -61.636879000 |
| C  | -40.040311000 | 14.526679000 | -60.602390000 |
| N  | -39.766734000 | 13.854042000 | -59.300346000 |
| O  | -38.679535000 | 15.026488000 | -67.363887000 |
| H  | -48.396125000 | 12.464032000 | -58.342540000 |
| H  | -48.002250000 | 11.507567000 | -56.900137000 |
| H  | -47.089298000 | 11.212761000 | -60.492999000 |

|   |               |              |               |
|---|---------------|--------------|---------------|
| H | -46.805118000 | 8.707778000  | -61.118903000 |
| H | -47.908413000 | 7.215315000  | -59.381210000 |
| H | -45.197157000 | 17.891886000 | -59.848240000 |
| H | -43.166947000 | 17.927929000 | -58.458728000 |
| H | -42.599108000 | 16.376098000 | -59.113918000 |
| H | -42.659885000 | 17.829278000 | -60.175309000 |
| H | -45.516931000 | 16.098858000 | -61.284148000 |
| H | -44.214045000 | 18.136250000 | -63.009424000 |
| H | -42.869560000 | 19.327801000 | -63.123033000 |
| H | -44.100305000 | 18.658439000 | -65.712793000 |
| H | -41.743224000 | 17.408503000 | -63.364055000 |
| H | -40.704594000 | 16.752996000 | -64.647505000 |
| H | -41.319674000 | 16.833900000 | -66.792847000 |
| H | -42.675763000 | 17.810234000 | -67.309167000 |
| H | -39.635000000 | 17.503805000 | -69.752454000 |
| H | -39.524211000 | 15.937266000 | -70.616244000 |
| H | -40.079050000 | 15.538525000 | -68.389504000 |
| H | -43.920926000 | 8.099197000  | -66.651519000 |
| H | -45.055759000 | 6.725171000  | -66.667883000 |
| H | -44.992470000 | 6.292426000  | -63.174211000 |
| H | -46.549687000 | 10.212537000 | -63.277673000 |
| H | -39.239437000 | 8.615513000  | -62.995742000 |
| H | -39.931150000 | 8.197217000  | -64.545133000 |
| H | -36.920534000 | 8.505574000  | -63.901516000 |
| H | -37.534546000 | 7.910584000  | -65.469136000 |
| H | -38.758747000 | 11.135955000 | -66.523561000 |
| H | -38.907081000 | 9.419707000  | -66.777319000 |
| H | -38.068421000 | 6.332919000  | -62.916207000 |
| H | -42.497389000 | 8.807005000  | -59.069216000 |
| H | -44.292444000 | 7.977071000  | -60.687766000 |
| H | -44.678912000 | 6.663825000  | -59.565084000 |
| H | -43.079482000 | 6.696792000  | -60.341332000 |
| H | -43.995632000 | 9.640273000  | -57.246181000 |
| H | -45.242946000 | 8.433895000  | -57.692827000 |
| H | -44.833440000 | 9.750348000  | -58.815155000 |
| H | -39.351587000 | 10.732948000 | -56.629974000 |
| H | -40.324320000 | 9.652995000  | -57.666460000 |
| H | -39.742747000 | 9.344608000  | -60.073171000 |
| H | -37.231747000 | 11.802418000 | -57.556299000 |
| H | -38.502316000 | 10.145223000 | -62.051652000 |
| H | -36.014389000 | 12.596867000 | -59.525124000 |
| H | -36.826369000 | 11.445900000 | -62.843250000 |
| H | -42.447259000 | 16.464265000 | -55.610478000 |
| H | -43.419879000 | 14.982989000 | -55.732925000 |
| H | -37.237056000 | 16.299620000 | -56.445364000 |
| H | -37.608859000 | 14.636582000 | -55.960720000 |

|   |               |              |               |
|---|---------------|--------------|---------------|
| H | -52.032524000 | 14.715070000 | -68.497549000 |
| H | -50.793353000 | 13.423598000 | -68.628895000 |
| H | -50.079253000 | 9.559694000  | -62.373483000 |
| H | -49.583518000 | 11.276953000 | -62.393104000 |
| H | -49.275828000 | 16.197005000 | -60.288424000 |
| H | -49.942102000 | 15.292952000 | -61.688577000 |
| H | -45.061110000 | 14.314612000 | -68.394278000 |
| H | -43.607444000 | 12.249996000 | -69.016597000 |
| H | -41.939913000 | 12.828836000 | -67.183198000 |
| H | -42.351292000 | 14.124705000 | -68.313306000 |
| H | -42.168799000 | 14.908098000 | -65.984061000 |
| H | -43.762505000 | 15.282341000 | -66.705568000 |
| H | -44.832600000 | 14.677839000 | -63.017034000 |
| H | -43.188614000 | 15.302211000 | -63.374994000 |
| H | -44.623281000 | 15.893122000 | -64.319743000 |
| H | -39.652158000 | 12.689462000 | -64.551908000 |
| H | -41.496152000 | 12.983992000 | -64.700497000 |
| H | -40.045247000 | 10.430196000 | -63.743734000 |
| H | -43.023892000 | 11.145105000 | -64.074866000 |
| H | -42.616752000 | 9.759967000  | -65.714662000 |
| H | -43.528783000 | 9.484425000  | -62.406939000 |
| H | -42.007543000 | 8.100526000  | -61.646814000 |
| H | -41.917552000 | 10.309139000 | -60.485778000 |
| H | -42.697402000 | 12.494125000 | -56.667616000 |
| H | -46.538666000 | 14.680376000 | -57.684004000 |
| H | -46.743679000 | 14.492774000 | -59.402961000 |
| H | -44.562050000 | 11.841453000 | -62.814362000 |
| H | -35.865416000 | 17.265469000 | -65.555251000 |
| H | -36.885747000 | 15.297594000 | -65.701561000 |
| H | -36.969842000 | 14.872288000 | -63.348538000 |
| H | -39.071765000 | 16.100356000 | -62.685912000 |
| H | -40.043601000 | 14.818694000 | -63.421614000 |
| H | -37.980906000 | 14.378988000 | -61.164903000 |
| H | -39.015285000 | 13.125160000 | -61.872996000 |
| H | -40.068900000 | 15.608523000 | -60.389123000 |
| H | -41.039619000 | 14.215421000 | -60.947323000 |
| H | -40.437013000 | 14.201340000 | -58.516803000 |
| H | -45.836233000 | 12.901932000 | -68.715261000 |
| H | -39.824946000 | 12.830189000 | -59.385732000 |
| H | -38.787646000 | 14.126948000 | -58.979715000 |
| H | -37.924788000 | 13.658108000 | -64.185295000 |
| H | -45.391846000 | 9.828569000  | -65.489685000 |
| H | -41.004588000 | 16.930437000 | -70.758120000 |
| H | -51.261512000 | 14.357696000 | -70.081905000 |
| H | -51.322622000 | 10.844298000 | -62.551716000 |
| H | -49.661421000 | 11.476915000 | -57.534186000 |

|   |               |              |               |
|---|---------------|--------------|---------------|
| H | -39.853004000 | 6.232533000  | -62.953150000 |
| H | -38.768273000 | 9.078868000  | -57.002288000 |
| H | -35.930670000 | 15.274702000 | -55.730165000 |
| H | -42.887764000 | 7.489049000  | -57.966162000 |
| H | -42.364047000 | 15.224418000 | -54.297092000 |
| H | -45.073781000 | 16.339107000 | -58.968277000 |
| H | -43.482213000 | 6.576202000  | -65.842469000 |
| H | -44.475205000 | 19.767615000 | -63.736529000 |
| H | -38.951031000 | 5.911374000  | -64.412710000 |
| H | -48.749492000 | 14.517893000 | -60.609665000 |
| H | -36.752741000 | 18.753593000 | -64.810784000 |

### **PFL-AE-cyclization-TS**

|   |              |               |              |
|---|--------------|---------------|--------------|
| C | 14.361315000 | -57.255208000 | 51.127294000 |
| S | 14.376173000 | -57.074706000 | 49.293663000 |
| C | 20.158635000 | -52.994658000 | 46.360263000 |
| S | 18.523293000 | -53.355805000 | 45.593095000 |
| C | 23.492288000 | -49.784676000 | 48.336572000 |
| C | 22.526151000 | -49.765719000 | 49.508688000 |
| O | 22.547973000 | -48.829476000 | 50.309575000 |
| C | 23.062912000 | -48.781301000 | 47.232355000 |
| C | 21.847017000 | -49.177800000 | 46.416373000 |
| C | 20.561685000 | -49.201283000 | 46.987641000 |
| C | 21.953375000 | -49.517289000 | 45.058571000 |
| C | 19.436446000 | -49.547578000 | 46.243065000 |
| C | 20.826922000 | -49.839201000 | 44.289928000 |
| C | 19.558171000 | -49.846389000 | 44.881701000 |
| O | 18.410433000 | -50.108653000 | 44.189480000 |
| N | 21.626871000 | -50.772290000 | 49.603629000 |
| C | 20.467652000 | -50.742686000 | 50.497847000 |
| C | 20.831387000 | -50.119528000 | 51.858052000 |
| O | 21.616050000 | -50.675959000 | 52.614984000 |
| C | 19.984069000 | -52.175715000 | 50.749944000 |
| S | 18.448143000 | -52.230394000 | 51.776721000 |
| N | 20.128358000 | -49.005161000 | 52.195039000 |
| C | 20.402632000 | -48.351927000 | 53.463226000 |
| C | 19.672085000 | -48.977438000 | 54.677950000 |
| O | 19.924610000 | -48.552554000 | 55.801607000 |
| C | 20.202027000 | -46.830492000 | 53.401285000 |
| C | 18.810393000 | -46.357513000 | 53.096365000 |
| C | 17.606696000 | -47.024756000 | 53.198460000 |
| N | 18.567906000 | -45.051796000 | 52.712884000 |
| C | 17.254033000 | -44.937106000 | 52.597786000 |
| N | 16.632328000 | -46.106361000 | 52.890664000 |
| N | 18.798980000 | -49.979361000 | 54.418339000 |
| C | 18.091104000 | -50.709184000 | 55.457584000 |



|    |              |               |              |
|----|--------------|---------------|--------------|
| C  | 16.591796000 | -50.816584000 | 55.184234000 |
| C  | 15.878758000 | -49.464071000 | 55.230017000 |
| N  | 14.692761000 | -49.416106000 | 54.569067000 |
| O  | 16.335889000 | -48.498089000 | 55.829216000 |
| C  | 8.324300000  | -48.074774000 | 48.380224000 |
| C  | 9.454088000  | -47.512695000 | 47.515359000 |
| O  | 9.281872000  | -47.504707000 | 46.265756000 |
| O  | 10.499136000 | -47.120196000 | 48.102853000 |
| C  | 8.213012000  | -51.141527000 | 45.961817000 |
| C  | 9.305943000  | -51.358544000 | 44.922716000 |
| O  | 9.675276000  | -50.457402000 | 44.165723000 |
| N  | 9.862450000  | -52.597332000 | 44.918030000 |
| C  | 10.895313000 | -53.022184000 | 43.989237000 |
| C  | 13.005381000 | -49.488304000 | 42.416647000 |
| C  | 13.687080000 | -48.677804000 | 43.510381000 |
| O  | 12.975410000 | -47.931382000 | 44.228270000 |
| O  | 14.941959000 | -48.825744000 | 43.653761000 |
| C  | 15.627245000 | -52.062868000 | 43.985441000 |
| N  | 15.722552000 | -51.044539000 | 45.057101000 |
| C  | 12.562498000 | -44.125698000 | 43.909908000 |
| N  | 13.106031000 | -43.990053000 | 45.248012000 |
| C  | 12.612012000 | -44.542105000 | 46.370394000 |
| N  | 13.286115000 | -44.330414000 | 47.516861000 |
| N  | 11.465227000 | -45.218192000 | 46.375319000 |
| C  | 23.793317000 | -41.643079000 | 50.911687000 |
| C  | 22.374162000 | -42.077990000 | 51.137797000 |
| C  | 21.905588000 | -43.111997000 | 51.928868000 |
| N  | 21.310789000 | -41.462869000 | 50.510931000 |
| C  | 20.236830000 | -42.122351000 | 50.910394000 |
| N  | 20.538744000 | -43.125251000 | 51.773525000 |
| S  | 14.793215000 | -53.529000000 | 50.679658000 |
| S  | 17.759702000 | -54.919265000 | 49.170505000 |
| S  | 15.029302000 | -54.267412000 | 46.873495000 |
| S  | 16.753486000 | -51.288742000 | 48.381516000 |
| Fe | 17.140440000 | -53.426468000 | 47.429730000 |
| Fe | 14.523616000 | -52.322824000 | 48.480860000 |
| Fe | 16.957454000 | -52.886459000 | 50.126510000 |
| Fe | 15.420553000 | -55.062181000 | 49.027767000 |
| N  | 12.373469000 | -52.933663000 | 48.474619000 |
| C  | 11.566468000 | -51.801723000 | 47.996880000 |
| C  | 12.374050000 | -51.017056000 | 46.933253000 |
| O  | 13.615263000 | -51.294329000 | 46.830550000 |
| C  | 11.085144000 | -50.897924000 | 49.156185000 |
| C  | 12.059024000 | -50.728515000 | 50.327242000 |
| S  | 13.680848000 | -50.088411000 | 49.764903000 |
| C  | 14.618499000 | -50.110974000 | 51.321737000 |

|    |              |               |              |
|----|--------------|---------------|--------------|
| C  | 16.135238000 | -47.180832000 | 49.722017000 |
| C  | 15.273894000 | -46.697125000 | 48.595294000 |
| O  | 15.902550000 | -45.546558000 | 47.975909000 |
| C  | 15.014230000 | -47.647675000 | 47.399611000 |
| O  | 13.747685000 | -47.328484000 | 46.882155000 |
| C  | 16.173432000 | -47.283714000 | 46.395871000 |
| O  | 15.728351000 | -46.853058000 | 45.149667000 |
| C  | 16.858974000 | -46.090823000 | 47.083348000 |
| O  | 11.755753000 | -50.190879000 | 46.258137000 |
| N  | 21.323233000 | -44.444864000 | 48.914636000 |
| C  | 20.484265000 | -43.923739000 | 48.020129000 |
| N  | 19.353502000 | -44.459295000 | 47.547952000 |
| C  | 19.080411000 | -45.636572000 | 48.115471000 |
| C  | 19.810498000 | -46.264744000 | 49.144595000 |
| C  | 21.026524000 | -45.619120000 | 49.505353000 |
| N  | 21.893537000 | -46.127032000 | 50.410069000 |
| N  | 19.211441000 | -47.451546000 | 49.507763000 |
| C  | 18.127098000 | -47.555272000 | 48.728616000 |
| N  | 18.048717000 | -46.490780000 | 47.812554000 |
| C  | 9.985584000  | -44.626300000 | 49.743526000 |
| C  | 11.107423000 | -45.477060000 | 50.286836000 |
| O  | 12.281961000 | -45.331705000 | 49.939990000 |
| N  | 10.800179000 | -46.356434000 | 51.278039000 |
| C  | 11.829730000 | -47.231580000 | 51.795808000 |
| C  | 12.885131000 | -46.533048000 | 52.654105000 |
| O  | 13.985631000 | -47.078747000 | 52.830270000 |
| N  | 12.544774000 | -45.371357000 | 53.222411000 |
| C  | 13.452599000 | -44.603786000 | 54.057324000 |
| C  | 19.301266000 | -45.934268000 | 42.768053000 |
| C  | 19.848131000 | -46.001231000 | 44.198166000 |
| C  | 18.193703000 | -46.961930000 | 42.512109000 |
| C  | 17.538784000 | -41.917124000 | 43.595573000 |
| C  | 16.395619000 | -42.615562000 | 44.339075000 |
| C  | 16.258605000 | -44.060682000 | 43.855931000 |
| C  | 16.614606000 | -42.538804000 | 45.857794000 |
| Na | 10.915197000 | -48.516781000 | 45.099918000 |
| H  | 23.923007000 | -48.639857000 | 46.556615000 |
| H  | 22.883795000 | -47.806589000 | 47.723358000 |
| H  | 20.425601000 | -48.927438000 | 48.035232000 |
| H  | 22.936400000 | -49.513605000 | 44.575841000 |
| H  | 18.454080000 | -49.612687000 | 46.711695000 |
| H  | 20.936166000 | -50.077964000 | 43.226976000 |
| H  | 18.615453000 | -50.382306000 | 43.279001000 |
| H  | 24.465596000 | -49.458843000 | 48.738766000 |
| H  | 20.894045000 | -46.416026000 | 52.648866000 |
| H  | 20.516691000 | -46.432202000 | 54.382250000 |

|   |              |               |              |
|---|--------------|---------------|--------------|
| H | 17.368944000 | -48.045493000 | 53.473507000 |
| H | 15.623327000 | -46.316694000 | 52.864609000 |
| H | 16.714413000 | -44.036899000 | 52.301300000 |
| H | 21.466202000 | -48.524271000 | 53.697113000 |
| H | 16.135910000 | -51.471606000 | 55.950628000 |
| H | 16.417247000 | -51.309305000 | 54.210395000 |
| H | 14.284153000 | -48.505567000 | 54.358117000 |
| H | 14.387055000 | -50.196774000 | 54.000163000 |
| H | 18.268168000 | -50.177984000 | 56.402572000 |
| H | 8.360477000  | -49.178513000 | 48.338945000 |
| H | 8.427880000  | -47.762955000 | 49.432170000 |
| H | 8.650342000  | -51.179521000 | 46.975041000 |
| H | 11.353066000 | -52.127348000 | 43.544788000 |
| H | 13.730972000 | -49.857411000 | 41.675428000 |
| H | 12.501119000 | -50.353110000 | 42.885131000 |
| H | 15.600912000 | -53.060675000 | 44.444466000 |
| H | 14.707643000 | -51.881176000 | 43.409616000 |
| H | 16.611417000 | -51.147879000 | 45.572520000 |
| H | 14.918925000 | -51.116965000 | 45.736617000 |
| H | 15.662843000 | -50.096127000 | 44.619867000 |
| H | 13.371787000 | -43.946669000 | 43.185384000 |
| H | 12.195220000 | -45.153134000 | 43.749908000 |
| H | 13.832838000 | -43.295699000 | 45.383603000 |
| H | 12.864112000 | -44.695575000 | 48.384123000 |
| H | 14.305452000 | -44.432416000 | 47.477736000 |
| H | 11.252673000 | -45.952658000 | 47.101454000 |
| H | 10.886534000 | -45.258763000 | 45.543142000 |
| H | 24.487163000 | -42.209194000 | 51.556939000 |
| H | 23.923773000 | -40.566699000 | 51.131888000 |
| H | 22.420945000 | -43.832555000 | 52.561205000 |
| H | 19.863367000 | -43.811327000 | 52.174784000 |
| H | 19.210484000 | -41.917017000 | 50.599365000 |
| H | 8.993465000  | -45.077226000 | 49.901669000 |
| H | 12.373527000 | -47.726010000 | 50.973514000 |
| H | 11.357328000 | -48.011009000 | 52.414861000 |
| H | 9.829231000  | -46.550278000 | 51.495494000 |
| H | 14.068885000 | -45.289316000 | 54.660404000 |
| H | 11.637762000 | -44.979817000 | 52.985974000 |
| H | 20.129484000 | -46.096695000 | 42.051141000 |
| H | 20.649059000 | -45.258145000 | 44.365730000 |
| H | 20.259720000 | -47.003467000 | 44.419646000 |
| H | 19.055959000 | -45.800329000 | 44.941539000 |
| H | 18.567651000 | -47.991415000 | 42.656092000 |
| H | 17.353720000 | -46.829465000 | 43.216825000 |
| H | 17.796194000 | -46.884543000 | 41.483099000 |
| H | 18.496297000 | -42.439284000 | 43.784816000 |

|   |              |               |              |
|---|--------------|---------------|--------------|
| H | 17.367985000 | -41.909441000 | 42.503425000 |
| H | 15.457160000 | -42.072905000 | 44.098985000 |
| H | 17.193834000 | -44.612969000 | 44.037989000 |
| H | 15.471345000 | -44.620487000 | 44.380221000 |
| H | 16.055409000 | -44.102803000 | 42.769384000 |
| H | 16.664167000 | -41.489268000 | 46.201944000 |
| H | 17.556415000 | -43.037125000 | 46.152601000 |
| H | 15.800894000 | -43.033013000 | 46.419339000 |
| H | 15.323797000 | -57.654008000 | 51.490743000 |
| H | 14.176151000 | -56.280659000 | 51.607506000 |
| H | 20.742457000 | -52.341209000 | 45.691522000 |
| H | 20.027002000 | -52.472720000 | 47.322484000 |
| H | 21.620481000 | -51.479948000 | 48.875267000 |
| H | 19.655912000 | -50.164575000 | 50.023415000 |
| H | 20.783148000 | -52.721731000 | 51.276733000 |
| H | 19.796778000 | -52.682049000 | 49.788319000 |
| H | 10.669720000 | -52.152334000 | 47.461686000 |
| H | 10.821924000 | -49.911233000 | 48.737706000 |
| H | 10.155892000 | -51.323762000 | 49.575525000 |
| H | 12.253893000 | -51.685551000 | 50.839344000 |
| H | 11.628615000 | -50.031836000 | 51.063757000 |
| H | 15.685620000 | -50.167040000 | 51.054989000 |
| H | 14.367435000 | -51.024754000 | 51.881964000 |
| H | 14.415336000 | -49.196696000 | 51.898131000 |
| H | 16.483696000 | -46.408917000 | 50.411594000 |
| H | 15.927937000 | -48.159434000 | 50.158041000 |
| H | 14.300614000 | -46.361107000 | 48.994950000 |
| H | 15.073739000 | -48.710440000 | 47.698382000 |
| H | 13.685345000 | -47.499297000 | 45.911334000 |
| H | 16.877152000 | -48.128225000 | 46.294221000 |
| H | 15.461699000 | -47.634988000 | 44.577045000 |
| H | 17.147611000 | -45.314741000 | 46.368525000 |
| H | 20.763991000 | -42.943419000 | 47.615245000 |
| H | 22.768347000 | -45.619188000 | 50.509304000 |
| H | 21.937551000 | -47.141702000 | 50.544590000 |
| H | 17.675152000 | -48.524673000 | 48.508301000 |
| H | 18.716161000 | -50.326795000 | 53.461001000 |
| H | 23.623366000 | -50.793769000 | 47.919238000 |
| H | 12.868546000 | -43.956412000 | 54.729090000 |
| H | 14.125168000 | -43.971352000 | 53.448440000 |
| H | 18.496610000 | -51.734286000 | 55.549123000 |
| H | 20.706339000 | -53.937258000 | 46.526393000 |
| H | 13.554341000 | -57.954772000 | 51.405227000 |
| H | 16.510968000 | -51.969233000 | 43.338101000 |
| H | 10.144989000 | -44.471467000 | 48.667240000 |
| H | 10.015402000 | -43.642738000 | 50.247437000 |

|   |              |               |              |
|---|--------------|---------------|--------------|
| H | 11.754456000 | -43.390608000 | 43.725189000 |
| H | 17.649993000 | -40.876066000 | 43.936212000 |
| H | 18.916207000 | -44.914437000 | 42.562260000 |
| H | 12.227865000 | -48.881002000 | 41.925496000 |
| H | 7.413321000  | -51.907658000 | 45.910222000 |
| H | 11.682177000 | -53.614482000 | 44.492249000 |
| H | 10.464867000 | -53.642324000 | 43.183209000 |
| H | 7.347135000  | -47.760420000 | 47.978386000 |
| H | 24.113028000 | -41.794854000 | 49.859471000 |
| H | 12.379570000 | -53.692827000 | 47.787912000 |
| H | 19.646407000 | -48.488165000 | 51.451966000 |
| H | 9.450342000  | -53.305386000 | 45.516880000 |
| H | 7.778283000  | -50.142283000 | 45.816048000 |
| H | 12.028260000 | -53.331434000 | 49.350555000 |

### **PFL-AE-cyclization-PC**

|   |              |               |              |
|---|--------------|---------------|--------------|
| C | 14.358417000 | -57.259444000 | 51.106907000 |
| S | 14.353140000 | -57.095493000 | 49.271059000 |
| C | 20.149282000 | -53.005229000 | 46.332296000 |
| S | 18.538033000 | -53.387963000 | 45.523803000 |
| C | 23.489616000 | -49.802477000 | 48.378186000 |
| C | 22.544090000 | -49.832819000 | 49.567576000 |
| O | 22.613870000 | -48.957932000 | 50.433220000 |
| C | 23.028829000 | -48.766780000 | 47.316262000 |
| C | 21.819193000 | -49.162357000 | 46.491106000 |
| C | 20.527235000 | -49.188166000 | 47.047658000 |
| C | 21.942009000 | -49.504093000 | 45.135016000 |
| C | 19.410937000 | -49.531826000 | 46.288181000 |
| C | 20.826086000 | -49.828279000 | 44.353177000 |
| C | 19.550247000 | -49.832015000 | 44.929141000 |
| O | 18.410539000 | -50.090335000 | 44.222648000 |
| N | 21.605755000 | -50.807294000 | 49.601277000 |
| C | 20.445292000 | -50.806633000 | 50.495174000 |
| C | 20.774347000 | -50.164961000 | 51.857862000 |
| O | 21.513360000 | -50.727654000 | 52.655171000 |
| C | 19.997571000 | -52.249788000 | 50.755657000 |
| S | 18.437753000 | -52.323034000 | 51.743277000 |
| N | 20.082552000 | -49.031261000 | 52.150459000 |
| C | 20.341891000 | -48.360945000 | 53.412528000 |
| C | 19.613904000 | -48.983575000 | 54.630618000 |
| O | 19.860257000 | -48.547379000 | 55.751469000 |
| C | 20.119214000 | -46.842486000 | 53.326689000 |
| C | 18.717826000 | -46.384981000 | 53.040900000 |
| C | 17.519610000 | -47.042618000 | 53.229202000 |
| N | 18.459376000 | -45.100307000 | 52.601958000 |
| C | 17.140901000 | -44.988120000 | 52.538570000 |

|    |              |               |              |
|----|--------------|---------------|--------------|
| N  | 16.533111000 | -46.139544000 | 52.917689000 |
| N  | 18.746342000 | -49.993388000 | 54.379414000 |
| C  | 18.053104000 | -50.727893000 | 55.426317000 |
| C  | 16.562602000 | -50.899274000 | 55.137162000 |
| C  | 15.790252000 | -49.579399000 | 55.176430000 |
| N  | 14.597257000 | -49.586058000 | 54.526378000 |
| O  | 16.209841000 | -48.589741000 | 55.765570000 |
| C  | 8.328451000  | -48.072091000 | 48.371553000 |
| C  | 9.443076000  | -47.544890000 | 47.468147000 |
| O  | 9.235637000  | -47.543744000 | 46.225186000 |
| O  | 10.515605000 | -47.171159000 | 48.020909000 |
| C  | 8.211484000  | -51.140043000 | 45.956352000 |
| C  | 9.299525000  | -51.361877000 | 44.913413000 |
| O  | 9.656737000  | -50.466967000 | 44.142843000 |
| N  | 9.865272000  | -52.595820000 | 44.918713000 |
| C  | 10.896503000 | -53.021496000 | 43.988347000 |
| C  | 13.051614000 | -49.397342000 | 42.446775000 |
| C  | 13.622504000 | -48.491317000 | 43.533655000 |
| O  | 12.842421000 | -47.728953000 | 44.146322000 |
| O  | 14.874261000 | -48.589119000 | 43.771639000 |
| C  | 15.606631000 | -52.018220000 | 43.961947000 |
| N  | 15.673862000 | -50.955154000 | 44.992883000 |
| C  | 12.574190000 | -44.124304000 | 43.866448000 |
| N  | 13.139611000 | -44.052854000 | 45.201542000 |
| C  | 12.673500000 | -44.678153000 | 46.296346000 |
| N  | 13.393531000 | -44.605305000 | 47.428276000 |
| N  | 11.499433000 | -45.307835000 | 46.291527000 |
| C  | 23.662319000 | -41.628500000 | 50.859865000 |
| C  | 22.258010000 | -42.153041000 | 50.952832000 |
| C  | 21.767307000 | -43.154379000 | 51.772462000 |
| N  | 21.233438000 | -41.657042000 | 50.173546000 |
| C  | 20.161382000 | -42.351651000 | 50.514888000 |
| N  | 20.427746000 | -43.269039000 | 51.480018000 |
| S  | 14.812935000 | -53.544051000 | 50.617462000 |
| S  | 17.758490000 | -54.965586000 | 49.072569000 |
| S  | 15.002074000 | -54.297256000 | 46.815789000 |
| S  | 16.785981000 | -51.338794000 | 48.308611000 |
| Fe | 17.125993000 | -53.468031000 | 47.339076000 |
| Fe | 14.542464000 | -52.336797000 | 48.422873000 |
| Fe | 16.980879000 | -52.934169000 | 50.046925000 |
| Fe | 15.411611000 | -55.094163000 | 48.968394000 |
| N  | 12.376774000 | -52.902130000 | 48.443055000 |
| C  | 11.590987000 | -51.749455000 | 47.978376000 |
| C  | 12.396433000 | -51.007866000 | 46.882203000 |
| O  | 13.628125000 | -51.321711000 | 46.772169000 |
| C  | 11.167662000 | -50.827900000 | 49.147369000 |

|    |              |               |              |
|----|--------------|---------------|--------------|
| C  | 12.166965000 | -50.699918000 | 50.303574000 |
| S  | 13.782862000 | -50.069633000 | 49.715963000 |
| C  | 14.760210000 | -50.102236000 | 51.247121000 |
| C  | 16.784483000 | -47.163898000 | 49.717128000 |
| C  | 15.635586000 | -46.740772000 | 48.786262000 |
| O  | 16.058301000 | -45.537495000 | 48.091958000 |
| C  | 15.315089000 | -47.730935000 | 47.639446000 |
| O  | 13.964409000 | -47.667500000 | 47.262879000 |
| C  | 16.238869000 | -47.211645000 | 46.466039000 |
| O  | 15.472437000 | -46.708757000 | 45.415548000 |
| C  | 16.980729000 | -46.039537000 | 47.127109000 |
| O  | 11.788607000 | -50.194523000 | 46.182345000 |
| N  | 21.654078000 | -44.671502000 | 48.712013000 |
| C  | 20.854544000 | -44.169143000 | 47.779738000 |
| N  | 19.665096000 | -44.647915000 | 47.363512000 |
| C  | 19.280794000 | -45.731641000 | 48.023101000 |
| C  | 19.978612000 | -46.337313000 | 49.121756000 |
| C  | 21.257571000 | -45.756525000 | 49.409801000 |
| N  | 22.072967000 | -46.243176000 | 50.369033000 |
| N  | 19.303259000 | -47.358782000 | 49.662692000 |
| C  | 18.064685000 | -47.468605000 | 48.905780000 |
| N  | 18.171618000 | -46.481555000 | 47.806002000 |
| C  | 10.128479000 | -44.643225000 | 49.641659000 |
| C  | 11.191308000 | -45.539701000 | 50.229320000 |
| O  | 12.378791000 | -45.471329000 | 49.905481000 |
| N  | 10.813172000 | -46.373359000 | 51.236572000 |
| C  | 11.789378000 | -47.270087000 | 51.815039000 |
| C  | 12.825638000 | -46.586210000 | 52.707587000 |
| O  | 13.904375000 | -47.155365000 | 52.937748000 |
| N  | 12.492810000 | -45.404366000 | 53.237588000 |
| C  | 13.379732000 | -44.641430000 | 54.098801000 |
| C  | 19.259476000 | -45.954869000 | 42.740368000 |
| C  | 19.920960000 | -46.043750000 | 44.119035000 |
| C  | 18.085676000 | -46.928788000 | 42.585343000 |
| C  | 17.557629000 | -41.918335000 | 43.598395000 |
| C  | 16.437785000 | -42.637251000 | 44.356276000 |
| C  | 16.332065000 | -44.085251000 | 43.876673000 |
| C  | 16.671529000 | -42.551884000 | 45.873049000 |
| Na | 10.875788000 | -48.533803000 | 45.043086000 |
| H  | 23.881154000 | -48.581833000 | 46.641289000 |
| H  | 22.831934000 | -47.813801000 | 47.841355000 |
| H  | 20.384364000 | -48.924011000 | 48.097105000 |
| H  | 22.931015000 | -49.499848000 | 44.664851000 |
| H  | 18.421762000 | -49.595565000 | 46.742804000 |
| H  | 20.947994000 | -50.068255000 | 43.291951000 |
| H  | 18.625726000 | -50.386519000 | 43.321589000 |

|   |              |               |              |
|---|--------------|---------------|--------------|
| H | 24.466187000 | -49.480521000 | 48.774459000 |
| H | 20.795891000 | -46.433480000 | 52.557411000 |
| H | 20.447570000 | -46.423512000 | 54.294630000 |
| H | 17.293350000 | -48.045717000 | 53.569178000 |
| H | 15.525861000 | -46.357434000 | 52.931581000 |
| H | 16.589408000 | -44.103968000 | 52.216906000 |
| H | 21.406586000 | -48.511951000 | 53.658558000 |
| H | 16.127270000 | -51.573506000 | 55.898774000 |
| H | 16.418639000 | -51.399432000 | 54.161956000 |
| H | 14.161961000 | -48.689602000 | 54.303841000 |
| H | 14.329392000 | -50.378154000 | 53.953693000 |
| H | 18.196483000 | -50.169740000 | 56.361402000 |
| H | 8.357035000  | -49.176971000 | 48.362436000 |
| H | 8.456214000  | -47.731209000 | 49.411713000 |
| H | 8.651424000  | -51.172852000 | 46.968685000 |
| H | 11.354334000 | -52.127079000 | 43.542530000 |
| H | 13.826735000 | -49.711301000 | 41.729768000 |
| H | 12.631194000 | -50.300332000 | 42.927288000 |
| H | 15.557264000 | -52.993980000 | 44.464902000 |
| H | 14.706241000 | -51.858509000 | 43.350034000 |
| H | 16.561507000 | -51.020479000 | 45.515002000 |
| H | 14.871358000 | -51.038558000 | 45.678370000 |
| H | 15.587557000 | -50.012191000 | 44.541159000 |
| H | 13.371870000 | -43.899343000 | 43.141379000 |
| H | 12.217622000 | -45.147778000 | 43.662005000 |
| H | 13.915901000 | -43.418442000 | 45.349691000 |
| H | 12.979965000 | -44.981542000 | 48.294730000 |
| H | 14.413967000 | -44.689103000 | 47.379407000 |
| H | 11.252407000 | -46.046422000 | 47.004825000 |
| H | 10.894087000 | -45.261665000 | 45.479221000 |
| H | 24.313786000 | -42.116995000 | 51.604980000 |
| H | 23.694089000 | -40.537855000 | 51.044031000 |
| H | 22.252214000 | -43.789485000 | 52.511436000 |
| H | 19.743608000 | -43.928987000 | 51.910916000 |
| H | 19.163585000 | -42.236059000 | 50.086866000 |
| H | 9.113831000  | -45.056026000 | 49.755137000 |
| H | 12.357247000 | -47.786356000 | 51.023927000 |
| H | 11.268106000 | -48.028422000 | 52.420775000 |
| H | 9.829742000  | -46.503151000 | 51.445571000 |
| H | 13.984364000 | -45.332477000 | 54.706819000 |
| H | 11.607178000 | -44.995554000 | 52.953571000 |
| H | 20.013316000 | -46.164068000 | 41.956635000 |
| H | 20.775092000 | -45.347742000 | 44.208071000 |
| H | 20.292065000 | -47.065949000 | 44.318049000 |
| H | 19.211125000 | -45.787721000 | 44.925378000 |
| H | 18.419708000 | -47.973847000 | 42.713778000 |



|   |              |               |              |
|---|--------------|---------------|--------------|
| H | 17.303394000 | -46.752326000 | 43.345275000 |
| H | 17.612047000 | -46.841789000 | 41.589964000 |
| H | 18.527827000 | -42.420377000 | 43.776948000 |
| H | 17.373228000 | -41.916017000 | 42.508583000 |
| H | 15.485635000 | -42.115371000 | 44.124695000 |
| H | 17.275416000 | -44.614396000 | 44.083535000 |
| H | 15.544172000 | -44.657788000 | 44.384883000 |
| H | 16.156603000 | -44.135101000 | 42.785932000 |
| H | 16.695710000 | -41.501135000 | 46.215590000 |
| H | 17.634135000 | -43.020171000 | 46.151480000 |
| H | 15.880862000 | -43.069319000 | 46.447309000 |
| H | 15.324956000 | -57.655692000 | 51.462400000 |
| H | 14.181515000 | -56.279516000 | 51.579286000 |
| H | 20.745171000 | -52.352632000 | 45.673301000 |
| H | 19.984452000 | -52.472936000 | 47.283690000 |
| H | 21.564972000 | -51.454618000 | 48.819501000 |
| H | 19.617563000 | -50.257849000 | 50.011896000 |
| H | 20.797015000 | -52.761974000 | 51.314344000 |
| H | 19.851195000 | -52.779541000 | 49.799608000 |
| H | 10.669459000 | -52.076539000 | 47.471036000 |
| H | 10.932363000 | -49.830239000 | 48.736993000 |
| H | 10.230596000 | -51.220527000 | 49.581681000 |
| H | 12.355724000 | -51.669958000 | 50.792931000 |
| H | 11.760117000 | -50.013886000 | 51.062530000 |
| H | 15.819844000 | -50.133690000 | 50.948261000 |
| H | 14.544729000 | -51.029934000 | 51.799055000 |
| H | 14.555011000 | -49.204909000 | 51.849579000 |
| H | 16.996020000 | -46.322151000 | 50.390274000 |
| H | 16.506751000 | -48.035439000 | 50.328079000 |
| H | 14.731492000 | -46.497397000 | 49.361850000 |
| H | 15.567706000 | -48.766091000 | 47.922519000 |
| H | 13.928467000 | -47.278238000 | 46.360390000 |
| H | 16.945285000 | -47.983878000 | 46.119731000 |
| H | 15.269681000 | -47.443550000 | 44.741393000 |
| H | 17.238716000 | -45.245516000 | 46.420308000 |
| H | 21.205510000 | -43.258336000 | 47.280215000 |
| H | 22.983961000 | -45.797158000 | 50.439922000 |
| H | 22.039073000 | -47.241012000 | 50.600648000 |
| H | 17.980570000 | -48.489385000 | 48.487336000 |
| H | 18.668279000 | -50.349904000 | 53.425522000 |
| H | 23.623373000 | -50.793769000 | 47.919241000 |
| H | 12.779876000 | -44.002475000 | 54.765059000 |
| H | 14.062602000 | -44.000877000 | 53.510311000 |
| H | 18.496609000 | -51.734315000 | 55.549134000 |
| H | 20.706346000 | -53.937225000 | 46.526392000 |
| H | 13.554314000 | -57.954786000 | 51.405248000 |

|   |              |               |              |
|---|--------------|---------------|--------------|
| H | 16.510975000 | -51.969243000 | 43.338088000 |
| H | 10.338346000 | -44.488473000 | 48.574400000 |
| H | 10.174162000 | -43.664465000 | 50.154030000 |
| H | 11.754452000 | -43.390588000 | 43.725171000 |
| H | 17.650018000 | -40.876018000 | 43.936202000 |
| H | 18.916200000 | -44.914437000 | 42.562274000 |
| H | 12.227840000 | -48.881038000 | 41.925503000 |
| H | 7.413324000  | -51.907655000 | 45.910219000 |
| H | 11.682153000 | -53.614488000 | 44.492256000 |
| H | 10.464870000 | -53.642324000 | 43.183192000 |
| H | 7.347160000  | -47.760440000 | 47.978389000 |
| H | 24.113042000 | -41.794842000 | 49.859464000 |
| H | 12.359741000 | -53.656771000 | 47.751445000 |
| H | 19.667138000 | -48.491696000 | 51.377988000 |
| H | 9.465173000  | -53.299740000 | 45.530482000 |
| H | 7.775078000  | -50.142182000 | 45.807084000 |
| H | 12.030015000 | -53.296684000 | 49.319764000 |

#### LAM-cyclization-TS

|   |               |              |               |
|---|---------------|--------------|---------------|
| C | -50.714500000 | 14.143747000 | -69.146162000 |
| S | -49.450149000 | 15.456466000 | -68.859733000 |
| C | -50.308194000 | 11.229785000 | -62.741984000 |
| S | -49.811757000 | 10.723711000 | -64.442728000 |
| C | -48.631002000 | 11.135907000 | -57.774243000 |
| C | -48.550711000 | 10.178368000 | -58.934093000 |
| C | -47.703486000 | 10.244952000 | -60.027491000 |
| N | -49.284420000 | 9.008387000  | -58.991392000 |
| C | -48.881836000 | 8.388845000  | -60.087071000 |
| N | -47.922618000 | 9.090609000  | -60.750752000 |
| C | -49.163000000 | 15.193275000 | -61.380249000 |
| S | -47.839339000 | 16.189712000 | -62.202306000 |
| C | -44.789758000 | 16.301860000 | -60.041475000 |
| C | -43.271372000 | 16.349432000 | -60.138562000 |
| O | -45.297685000 | 15.107349000 | -60.620259000 |
| C | -43.574790000 | 19.162529000 | -63.560106000 |
| N | -42.962261000 | 18.868214000 | -64.846839000 |
| C | -41.725659000 | 18.370922000 | -65.008301000 |
| N | -40.957430000 | 18.083283000 | -63.944378000 |
| N | -41.202886000 | 18.184380000 | -66.223502000 |
| C | -40.384246000 | 16.416806000 | -69.995441000 |
| O | -40.872684000 | 16.728207000 | -68.712152000 |
| C | -44.094118000 | 7.431442000  | -66.182847000 |
| C | -45.034479000 | 7.923135000  | -65.124060000 |
| C | -45.528253000 | 7.375983000  | -63.953014000 |
| N | -45.619099000 | 9.175449000  | -65.195954000 |
| C | -46.397253000 | 9.341480000  | -64.093432000 |

|   |               |              |               |
|---|---------------|--------------|---------------|
| N | -46.372824000 | 8.270215000  | -63.317337000 |
| C | -38.990432000 | 6.577971000  | -63.533492000 |
| C | -39.187054000 | 8.049977000  | -63.897311000 |
| C | -37.929566000 | 8.738604000  | -64.436529000 |
| C | -38.095185000 | 10.217418000 | -64.764185000 |
| N | -39.226589000 | 10.576589000 | -65.403210000 |
| O | -37.206154000 | 11.041765000 | -64.498428000 |
| C | -43.389816000 | 7.986527000  | -58.814365000 |
| C | -43.691303000 | 6.972029000  | -59.920536000 |
| C | -44.639030000 | 8.719866000  | -58.321359000 |
| C | -39.133514000 | 10.064313000 | -57.358354000 |
| C | -38.408201000 | 10.545887000 | -58.595926000 |
| C | -38.758932000 | 10.069440000 | -59.870781000 |
| C | -37.373222000 | 11.495961000 | -58.535343000 |
| C | -38.113016000 | 10.513168000 | -61.027861000 |
| C | -36.713355000 | 11.948751000 | -59.680552000 |
| C | -37.078905000 | 11.461677000 | -60.944635000 |
| O | -36.429237000 | 11.947088000 | -62.032522000 |
| C | -42.463841000 | 15.367506000 | -55.387939000 |
| C | -41.288156000 | 14.769123000 | -56.179338000 |
| O | -40.532604000 | 13.944479000 | -55.630121000 |
| O | -41.211551000 | 15.157569000 | -57.391946000 |
| C | -36.787731000 | 15.318806000 | -56.430746000 |
| C | -36.397982000 | 14.857490000 | -57.854885000 |
| O | -35.283152000 | 14.321527000 | -58.012797000 |
| O | -37.271604000 | 15.053957000 | -58.757884000 |
| N | -44.962181000 | 13.534003000 | -68.198468000 |
| C | -43.608074000 | 12.956530000 | -68.201524000 |
| C | -43.579346000 | 11.747351000 | -67.227268000 |
| O | -42.532705000 | 11.069659000 | -67.205757000 |
| C | -42.539155000 | 14.027888000 | -67.891309000 |
| C | -42.895292000 | 15.060757000 | -66.816007000 |
| S | -43.395568000 | 14.212707000 | -65.282905000 |
| C | -43.744317000 | 15.586383000 | -64.150205000 |
| C | -43.204189000 | 12.356835000 | -62.869651000 |
| C | -42.127484000 | 11.431377000 | -63.348187000 |
| O | -41.339205000 | 10.945966000 | -62.244372000 |
| C | -42.693628000 | 10.150299000 | -64.012428000 |
| O | -41.910436000 | 9.668815000  | -65.075870000 |
| C | -42.768247000 | 9.144488000  | -62.814738000 |
| O | -42.073413000 | 7.950466000  | -63.074884000 |
| C | -42.141696000 | 9.958886000  | -61.640476000 |
| O | -44.624868000 | 11.532052000 | -66.537448000 |
| N | -43.328196000 | 12.703596000 | -57.399345000 |
| C | -42.260020000 | 11.941766000 | -57.667675000 |
| N | -42.019725000 | 11.216346000 | -58.768508000 |

|    |               |              |               |
|----|---------------|--------------|---------------|
| C  | -43.017938000 | 11.282631000 | -59.654998000 |
| C  | -44.167735000 | 12.083585000 | -59.523113000 |
| C  | -44.286131000 | 12.836237000 | -58.330858000 |
| N  | -45.353661000 | 13.655126000 | -58.123313000 |
| N  | -45.003761000 | 11.938116000 | -60.595024000 |
| C  | -44.364931000 | 11.110730000 | -61.409589000 |
| N  | -43.189984000 | 10.582863000 | -60.835015000 |
| S  | -49.804168000 | 14.536630000 | -65.089358000 |
| S  | -47.945007000 | 12.330445000 | -67.299659000 |
| S  | -46.585906000 | 12.869098000 | -63.902297000 |
| S  | -46.600868000 | 15.816056000 | -66.271017000 |
| Fe | -45.842740000 | 13.352742000 | -66.156142000 |
| Fe | -47.559857000 | 15.040424000 | -64.238232000 |
| Fe | -48.435587000 | 14.600800000 | -66.993150000 |
| Fe | -48.564911000 | 12.538665000 | -65.084795000 |
| C  | -36.308751000 | 14.444332000 | -63.891603000 |
| N  | -37.417586000 | 15.048831000 | -63.990885000 |
| C  | -38.393089000 | 14.526623000 | -64.928877000 |
| C  | -39.027827000 | 15.619585000 | -65.822116000 |
| O  | -38.988092000 | 16.826030000 | -65.451153000 |
| C  | -39.501434000 | 13.765341000 | -64.163328000 |
| C  | -40.089689000 | 14.455054000 | -62.915197000 |
| C  | -39.519962000 | 13.884498000 | -61.608132000 |
| C  | -40.242976000 | 14.413263000 | -60.377322000 |
| N  | -39.685389000 | 13.907301000 | -59.098487000 |
| O  | -39.582265000 | 15.199569000 | -66.869391000 |
| H  | -48.007918000 | 12.026959000 | -57.966231000 |
| H  | -48.243177000 | 10.659302000 | -56.852613000 |
| H  | -46.964175000 | 10.988122000 | -60.324862000 |
| H  | -47.421943000 | 8.783658000  | -61.602491000 |
| H  | -49.251685000 | 7.428035000  | -60.450507000 |
| H  | -45.241179000 | 17.182688000 | -60.538178000 |
| H  | -42.894087000 | 17.329369000 | -59.791598000 |
| H  | -42.806179000 | 15.581096000 | -59.498312000 |
| H  | -42.941078000 | 16.195382000 | -61.181761000 |
| H  | -46.097461000 | 15.333901000 | -61.165671000 |
| H  | -43.869686000 | 18.244983000 | -63.017904000 |
| H  | -42.892873000 | 19.755769000 | -62.926163000 |
| H  | -43.506911000 | 19.038738000 | -65.684843000 |
| H  | -41.318405000 | 18.117519000 | -62.999060000 |
| H  | -40.070019000 | 17.592744000 | -64.133836000 |
| H  | -40.285549000 | 17.686714000 | -66.243805000 |
| H  | -41.763589000 | 18.188406000 | -67.070386000 |
| H  | -39.331417000 | 16.743422000 | -70.144179000 |
| H  | -40.431352000 | 15.328233000 | -70.215811000 |
| H  | -40.376922000 | 16.184489000 | -68.036162000 |

|   |               |              |               |
|---|---------------|--------------|---------------|
| H | -43.393549000 | 8.233858000  | -66.464907000 |
| H | -44.638962000 | 7.117469000  | -67.093736000 |
| H | -45.304452000 | 6.395740000  | -63.530270000 |
| H | -46.967856000 | 10.252046000 | -63.919065000 |
| H | -39.541794000 | 8.596908000  | -63.007917000 |
| H | -40.017653000 | 8.129145000  | -64.613410000 |
| H | -37.099237000 | 8.665904000  | -63.714239000 |
| H | -37.588321000 | 8.239163000  | -65.365229000 |
| H | -39.343015000 | 11.567325000 | -65.598832000 |
| H | -40.099699000 | 10.034571000 | -65.331714000 |
| H | -38.079640000 | 6.415309000  | -62.927728000 |
| H | -42.656563000 | 8.722513000  | -59.175955000 |
| H | -44.202951000 | 7.461165000  | -60.771440000 |
| H | -44.361256000 | 6.168434000  | -59.561928000 |
| H | -42.766974000 | 6.493486000  | -60.295676000 |
| H | -44.387755000 | 9.468481000  | -57.548705000 |
| H | -45.374686000 | 8.015723000  | -57.888255000 |
| H | -45.140711000 | 9.253023000  | -59.148719000 |
| H | -39.017314000 | 10.781260000 | -56.526214000 |
| H | -40.210438000 | 9.956167000  | -57.568294000 |
| H | -39.571312000 | 9.342881000  | -59.965162000 |
| H | -37.076344000 | 11.920761000 | -57.570036000 |
| H | -38.440065000 | 10.150943000 | -62.003445000 |
| H | -35.948018000 | 12.722121000 | -59.583404000 |
| H | -36.752080000 | 11.548467000 | -62.879250000 |
| H | -42.582784000 | 16.441031000 | -55.617564000 |
| H | -43.377735000 | 14.846953000 | -55.725208000 |
| H | -37.187648000 | 16.348857000 | -56.462618000 |
| H | -37.607995000 | 14.677873000 | -56.052695000 |
| H | -51.434145000 | 14.111325000 | -68.310337000 |
| H | -50.228523000 | 13.157229000 | -69.226335000 |
| H | -49.611444000 | 10.814501000 | -61.994699000 |
| H | -50.324328000 | 12.328054000 | -62.645153000 |
| H | -49.883055000 | 15.873517000 | -60.893783000 |
| H | -49.698881000 | 14.589957000 | -62.130553000 |
| H | -44.987703000 | 14.476202000 | -68.594478000 |
| H | -43.353602000 | 12.530308000 | -69.188700000 |
| H | -41.601855000 | 13.517516000 | -67.618766000 |
| H | -42.325089000 | 14.603637000 | -68.806544000 |
| H | -42.009560000 | 15.675621000 | -66.612935000 |
| H | -43.724193000 | 15.718498000 | -67.127548000 |
| H | -44.286126000 | 15.165535000 | -63.287256000 |
| H | -42.801263000 | 16.040670000 | -63.808554000 |
| H | -44.389358000 | 16.326363000 | -64.647104000 |
| H | -42.933523000 | 13.128877000 | -62.143627000 |
| H | -44.064778000 | 12.548533000 | -63.509930000 |

|   |               |              |               |
|---|---------------|--------------|---------------|
| H | -41.435480000 | 11.936445000 | -64.040200000 |
| H | -43.704286000 | 10.363261000 | -64.382009000 |
| H | -42.202345000 | 10.153703000 | -65.908531000 |
| H | -43.819684000 | 8.909266000  | -62.602404000 |
| H | -42.451227000 | 7.257592000  | -62.508890000 |
| H | -41.507878000 | 9.344908000  | -60.991345000 |
| H | -41.479616000 | 11.942881000 | -56.898610000 |
| H | -45.276609000 | 14.282752000 | -57.326747000 |
| H | -45.735267000 | 14.065894000 | -58.985337000 |
| H | -44.879094000 | 10.599714000 | -62.222630000 |
| H | -36.040971000 | 13.554080000 | -64.496957000 |
| H | -37.939703000 | 13.795238000 | -65.628807000 |
| H | -39.067612000 | 12.800821000 | -63.853630000 |
| H | -39.918017000 | 15.544268000 | -62.959120000 |
| H | -41.184473000 | 14.316798000 | -62.918124000 |
| H | -38.441861000 | 14.106629000 | -61.534960000 |
| H | -39.620963000 | 12.784635000 | -61.623653000 |
| H | -40.195984000 | 15.513778000 | -60.324114000 |
| H | -41.309222000 | 14.135384000 | -60.408509000 |
| H | -40.281973000 | 14.341601000 | -58.277378000 |
| H | -45.610186000 | 12.962511000 | -68.746743000 |
| H | -39.706520000 | 12.879388000 | -59.052547000 |
| H | -38.684250000 | 14.246734000 | -58.958071000 |
| H | -40.303457000 | 13.555737000 | -64.892148000 |
| H | -45.353494000 | 9.935167000  | -65.843967000 |
| H | -41.004632000 | 16.930448000 | -70.758089000 |
| H | -51.261482000 | 14.357688000 | -70.081872000 |
| H | -51.322513000 | 10.844276000 | -62.551695000 |
| H | -49.661441000 | 11.476912000 | -57.534192000 |
| H | -39.853190000 | 6.232536000  | -62.953268000 |
| H | -38.768160000 | 9.078881000  | -57.002273000 |
| H | -35.930664000 | 15.274724000 | -55.730109000 |
| H | -42.887849000 | 7.489060000  | -57.966169000 |
| H | -42.364053000 | 15.224388000 | -54.297137000 |
| H | -45.073575000 | 16.339365000 | -58.968065000 |
| H | -43.482266000 | 6.576155000  | -65.842491000 |
| H | -44.475195000 | 19.767721000 | -63.736597000 |
| H | -38.950770000 | 5.911175000  | -64.412696000 |
| H | -48.749834000 | 14.517776000 | -60.609779000 |
| H | -35.562580000 | 14.789887000 | -63.157359000 |

#### LAM-cyclization-PC

|   |               |              |               |
|---|---------------|--------------|---------------|
| C | -50.998405000 | 14.292158000 | -69.012696000 |
| S | -49.714961000 | 15.560687000 | -68.630688000 |
| C | -50.283239000 | 10.523426000 | -62.737083000 |
| S | -49.979078000 | 10.393330000 | -64.549613000 |

|   |               |              |               |
|---|---------------|--------------|---------------|
| C | -48.730054000 | 11.706555000 | -58.093704000 |
| C | -48.207625000 | 10.511249000 | -58.846081000 |
| C | -47.513880000 | 10.485708000 | -60.046961000 |
| N | -48.333615000 | 9.223971000  | -58.362475000 |
| C | -47.734244000 | 8.449124000  | -59.250889000 |
| N | -47.220205000 | 9.160281000  | -60.288200000 |
| C | -49.042313000 | 15.464093000 | -61.098095000 |
| S | -47.690552000 | 16.155945000 | -62.145542000 |
| C | -44.648873000 | 16.958192000 | -59.788717000 |
| C | -43.241129000 | 17.388807000 | -59.405991000 |
| O | -44.597927000 | 16.229657000 | -61.003472000 |
| C | -43.768267000 | 18.934162000 | -63.637221000 |
| N | -43.432959000 | 18.492977000 | -64.981935000 |
| C | -42.310988000 | 17.835226000 | -65.313190000 |
| N | -41.433778000 | 17.461054000 | -64.373446000 |
| N | -42.032986000 | 17.591576000 | -66.602304000 |
| C | -40.236798000 | 16.469811000 | -70.098324000 |
| O | -40.861364000 | 15.942306000 | -68.948397000 |
| C | -44.305362000 | 7.287090000  | -66.041946000 |
| C | -44.922538000 | 7.844206000  | -64.792002000 |
| C | -45.210401000 | 7.311202000  | -63.545987000 |
| N | -45.433830000 | 9.125005000  | -64.751031000 |
| C | -45.990882000 | 9.317338000  | -63.530688000 |
| N | -45.878412000 | 8.239734000  | -62.769993000 |
| C | -38.953023000 | 6.532466000  | -63.508902000 |
| C | -38.979540000 | 8.014566000  | -63.874287000 |
| C | -37.650895000 | 8.492400000  | -64.497807000 |
| C | -37.726229000 | 9.923812000  | -65.003889000 |
| N | -38.216151000 | 10.090159000 | -66.250533000 |
| O | -37.391103000 | 10.899178000 | -64.320809000 |
| C | -43.242566000 | 8.214531000  | -58.726439000 |
| C | -43.845070000 | 7.450858000  | -59.909614000 |
| C | -44.231619000 | 9.199488000  | -58.096242000 |
| C | -39.290365000 | 9.964617000  | -57.422046000 |
| C | -38.570114000 | 10.486851000 | -58.643281000 |
| C | -38.869086000 | 10.004993000 | -59.928176000 |
| C | -37.541038000 | 11.439689000 | -58.538038000 |
| C | -38.168368000 | 10.446715000 | -61.052866000 |
| C | -36.820122000 | 11.880217000 | -59.649846000 |
| C | -37.126600000 | 11.380108000 | -60.923975000 |
| O | -36.419580000 | 11.824179000 | -61.991487000 |
| C | -42.456641000 | 15.443655000 | -55.376977000 |
| C | -41.288864000 | 14.881467000 | -56.208969000 |
| O | -40.472415000 | 14.103767000 | -55.677984000 |
| O | -41.291708000 | 15.238535000 | -57.433890000 |
| C | -36.782296000 | 15.334414000 | -56.434464000 |

|    |               |              |               |
|----|---------------|--------------|---------------|
| C  | -36.406180000 | 14.809724000 | -57.838327000 |
| O  | -35.314053000 | 14.224771000 | -57.976473000 |
| O  | -37.269599000 | 15.012521000 | -58.750060000 |
| N  | -45.204675000 | 13.334758000 | -68.083674000 |
| C  | -43.917374000 | 12.619316000 | -68.080784000 |
| C  | -44.037142000 | 11.349077000 | -67.199028000 |
| O  | -43.082531000 | 10.548589000 | -67.224391000 |
| C  | -42.767608000 | 13.533352000 | -67.612977000 |
| C  | -43.074470000 | 14.486514000 | -66.452879000 |
| S  | -43.870654000 | 13.661312000 | -65.026299000 |
| C  | -44.049742000 | 15.043225000 | -63.870056000 |
| C  | -40.586405000 | 12.115173000 | -64.998469000 |
| C  | -40.914481000 | 11.158629000 | -63.877344000 |
| O  | -41.200875000 | 11.860496000 | -62.658424000 |
| C  | -42.175694000 | 10.309451000 | -64.089520000 |
| O  | -42.042896000 | 9.314036000  | -65.060763000 |
| C  | -42.450306000 | 9.807242000  | -62.664509000 |
| O  | -41.670978000 | 8.657195000  | -62.394706000 |
| C  | -41.964172000 | 11.018965000 | -61.809936000 |
| O  | -45.100627000 | 11.229775000 | -66.512857000 |
| N  | -43.793923000 | 13.016094000 | -57.440704000 |
| C  | -42.614807000 | 12.444839000 | -57.725990000 |
| N  | -42.183965000 | 11.993419000 | -58.906747000 |
| C  | -43.091755000 | 12.169377000 | -59.874248000 |
| C  | -44.340996000 | 12.788499000 | -59.732446000 |
| C  | -44.678200000 | 13.225196000 | -58.430486000 |
| N  | -45.863318000 | 13.819573000 | -58.160525000 |
| N  | -45.030959000 | 12.783041000 | -60.926285000 |
| C  | -44.233672000 | 12.171911000 | -61.767687000 |
| N  | -43.037682000 | 11.771931000 | -61.196881000 |
| S  | -50.069991000 | 14.426380000 | -64.885746000 |
| S  | -48.299157000 | 12.316081000 | -67.258681000 |
| S  | -46.952872000 | 12.635711000 | -63.824950000 |
| S  | -46.808502000 | 15.631166000 | -66.099572000 |
| Fe | -46.196788000 | 13.135924000 | -66.086406000 |
| Fe | -47.793225000 | 14.853989000 | -64.096969000 |
| Fe | -48.732597000 | 14.563908000 | -66.821060000 |
| Fe | -48.908860000 | 12.371872000 | -65.015464000 |
| C  | -36.474162000 | 17.047130000 | -65.198774000 |
| N  | -37.601334000 | 16.570532000 | -64.873791000 |
| C  | -37.885525000 | 15.169909000 | -65.204477000 |
| C  | -39.057566000 | 15.188348000 | -66.251469000 |
| O  | -40.120958000 | 15.753220000 | -65.875367000 |
| C  | -38.226235000 | 14.397994000 | -63.962588000 |
| C  | -39.248140000 | 14.833332000 | -62.959282000 |
| C  | -39.050898000 | 14.150565000 | -61.597215000 |



|   |               |              |               |
|---|---------------|--------------|---------------|
| C | -40.057969000 | 14.593939000 | -60.538045000 |
| N | -39.731527000 | 14.033329000 | -59.198687000 |
| O | -38.867502000 | 14.675695000 | -67.373086000 |
| H | -48.936980000 | 12.545843000 | -58.781608000 |
| H | -47.990582000 | 12.072553000 | -57.355930000 |
| H | -47.188480000 | 11.281293000 | -60.716042000 |
| H | -46.713852000 | 8.762785000  | -61.105186000 |
| H | -47.644039000 | 7.362648000  | -59.193683000 |
| H | -45.302488000 | 17.850906000 | -59.896036000 |
| H | -43.269425000 | 18.055430000 | -58.524540000 |
| H | -42.611743000 | 16.522267000 | -59.138382000 |
| H | -42.767338000 | 17.937595000 | -60.241546000 |
| H | -45.520737000 | 16.030922000 | -61.288575000 |
| H | -44.215214000 | 18.129875000 | -63.020952000 |
| H | -42.871494000 | 19.323687000 | -63.126318000 |
| H | -44.116293000 | 18.654081000 | -65.713953000 |
| H | -41.701158000 | 17.466825000 | -63.396077000 |
| H | -40.671937000 | 16.821299000 | -64.688241000 |
| H | -41.305985000 | 16.896006000 | -66.826457000 |
| H | -42.704160000 | 17.825466000 | -67.324567000 |
| H | -39.490072000 | 17.256710000 | -69.854847000 |
| H | -39.717986000 | 15.688939000 | -70.694701000 |
| H | -40.194394000 | 15.435475000 | -68.411604000 |
| H | -43.894946000 | 8.104528000  | -66.656407000 |
| H | -45.059304000 | 6.755717000  | -66.654584000 |
| H | -44.971251000 | 6.315412000  | -63.170594000 |
| H | -46.467477000 | 10.258886000 | -63.256863000 |
| H | -39.198824000 | 8.602989000  | -62.973084000 |
| H | -39.819331000 | 8.216022000  | -64.559168000 |
| H | -36.845895000 | 8.451493000  | -63.745471000 |
| H | -37.370051000 | 7.821255000  | -65.330175000 |
| H | -38.379531000 | 11.033614000 | -66.592379000 |
| H | -38.567284000 | 9.312609000  | -66.799328000 |
| H | -38.067968000 | 6.272072000  | -62.899419000 |
| H | -42.344093000 | 8.771775000  | -59.057590000 |
| H | -44.206981000 | 8.135238000  | -60.697452000 |
| H | -44.720372000 | 6.854321000  | -59.591148000 |
| H | -43.119505000 | 6.748607000  | -60.362698000 |
| H | -43.775662000 | 9.751358000  | -57.255535000 |
| H | -45.132791000 | 8.679596000  | -57.721601000 |
| H | -44.572093000 | 9.944409000  | -58.838352000 |
| H | -39.340182000 | 10.730536000 | -56.627409000 |
| H | -40.323936000 | 9.660368000  | -57.663996000 |
| H | -39.669398000 | 9.268957000  | -60.061368000 |
| H | -37.288365000 | 11.862303000 | -57.559143000 |
| H | -38.431300000 | 10.085659000 | -62.046713000 |

|   |               |              |               |
|---|---------------|--------------|---------------|
| H | -36.048671000 | 12.643049000 | -59.520387000 |
| H | -36.748484000 | 11.401149000 | -62.825344000 |
| H | -42.549955000 | 16.533855000 | -55.531128000 |
| H | -43.382635000 | 14.973885000 | -55.753920000 |
| H | -37.131999000 | 16.380740000 | -56.504358000 |
| H | -37.634704000 | 14.746347000 | -56.042433000 |
| H | -51.905306000 | 14.459511000 | -68.406466000 |
| H | -50.612483000 | 13.281245000 | -68.802043000 |
| H | -50.123163000 | 9.538904000  | -62.264485000 |
| H | -49.590817000 | 11.243927000 | -62.271054000 |
| H | -49.303372000 | 16.192748000 | -60.311262000 |
| H | -49.934794000 | 15.270512000 | -61.716277000 |
| H | -45.111908000 | 14.297489000 | -68.415698000 |
| H | -43.653811000 | 12.254136000 | -69.089500000 |
| H | -41.914550000 | 12.887093000 | -67.358926000 |
| H | -42.430496000 | 14.173069000 | -68.446757000 |
| H | -42.130337000 | 14.935591000 | -66.113859000 |
| H | -43.758832000 | 15.292935000 | -66.763976000 |
| H | -44.680480000 | 14.682707000 | -63.045605000 |
| H | -43.065078000 | 15.336407000 | -63.476058000 |
| H | -44.550190000 | 15.890420000 | -64.363695000 |
| H | -41.311085000 | 12.939282000 | -65.014985000 |
| H | -40.650660000 | 11.566653000 | -65.952496000 |
| H | -40.066522000 | 10.474822000 | -63.709851000 |
| H | -42.997200000 | 11.001299000 | -64.352355000 |
| H | -42.438218000 | 9.673313000  | -65.897153000 |
| H | -43.519240000 | 9.594038000  | -62.495746000 |
| H | -41.962594000 | 8.283279000  | -61.547300000 |
| H | -41.339631000 | 10.658968000 | -60.977310000 |
| H | -41.916732000 | 12.352447000 | -56.887367000 |
| H | -46.041200000 | 14.187680000 | -57.233059000 |
| H | -46.489538000 | 14.059395000 | -58.920129000 |
| H | -44.470455000 | 11.973360000 | -62.812276000 |
| H | -35.682624000 | 16.462641000 | -65.715490000 |
| H | -37.025757000 | 14.688100000 | -65.709160000 |
| H | -37.778001000 | 13.405954000 | -63.851134000 |
| H | -39.213361000 | 15.934281000 | -62.847246000 |
| H | -40.269939000 | 14.604886000 | -63.336732000 |
| H | -38.037354000 | 14.357703000 | -61.214013000 |
| H | -39.132311000 | 13.058957000 | -61.727402000 |
| H | -40.053923000 | 15.691403000 | -60.424622000 |
| H | -41.084948000 | 14.288206000 | -60.801603000 |
| H | -40.372217000 | 14.466164000 | -58.425314000 |
| H | -45.881882000 | 12.872628000 | -68.696141000 |
| H | -39.837774000 | 13.009642000 | -59.180102000 |
| H | -38.730409000 | 14.298898000 | -58.944214000 |

|   |               |              |               |
|---|---------------|--------------|---------------|
| H | -39.574746000 | 12.532918000 | -64.894435000 |
| H | -45.323081000 | 9.863179000  | -65.478382000 |
| H | -41.004679000 | 16.930491000 | -70.758101000 |
| H | -51.261440000 | 14.357686000 | -70.081832000 |
| H | -51.322543000 | 10.844267000 | -62.551678000 |
| H | -49.661444000 | 11.476913000 | -57.534187000 |
| H | -39.853092000 | 6.232451000  | -62.953189000 |
| H | -38.768231000 | 9.078862000  | -57.002306000 |
| H | -35.930643000 | 15.274696000 | -55.730132000 |
| H | -42.887765000 | 7.489058000  | -57.966180000 |
| H | -42.364083000 | 15.224448000 | -54.297012000 |
| H | -45.073837000 | 16.339038000 | -58.968304000 |
| H | -43.482263000 | 6.576154000  | -65.842491000 |
| H | -44.475113000 | 19.767745000 | -63.736656000 |
| H | -38.950953000 | 5.911395000  | -64.412663000 |
| H | -48.749537000 | 14.517901000 | -60.609698000 |
| H | -36.239403000 | 18.099087000 | -64.963302000 |
